# Supplementary material for: The characteristics of proteome and metabolome associated with contrasting sperm motility in goat seminal plasma
Source: Sci Rep. 2021 Jul 30;11:15562. doi: 10.1038/s41598-021-95138-9 (PMC8324791; doi:10.1038/s41598-021-95138-9)
Supplement: Supplementary file 4 — Supplementary Information 4. [file 41598_2021_95138_MOESM4_ESM.xlsx]

## Sheet: Summary
Header line description of table 1			Table 1. MS/MS spectrum database search analysis summary
Total spectrum	Number of spectrum produced by mass spectrometer
Matched spectrum	Number of spectrum matched with alignment protein		Total spectrum	Matched spectrum	Peptides	Unique peptides	Identified proteins	Quantifiable proteins
Peptides	Number of peptides whitch spectrum hit		308933	36946 (12.0%)	15724	14861	2299	2098
Unique peptides	Number of identified peptides that only come form this protein groups
Identified proteins	Number of proteins detected by spectrum search analysis
Quantifiable proteins	Number of proteins quantifiable		Table 2. Differentially expressed protein summary (Filtered with threshold value of expression fold change and P value < 0.05)
Header line description of worksheet "Protein_quant"			Compare group	Regulated type	fold change >1.2	fold change >1.3	fold change >1.5	fold change >2
Protein accession	Protein accession number of database used for search		G/B	up-regulated	402	340	175	31
Protein description	Protein functional description			down-regulated	416	374	274	125
Gene name	Indicates the name of the gene that code for the protein sequence
MW [kDa]	Protein molecular weight ,unit [kDa]
Coverage [%]	Percent of identified peptdie sequence covering in protein sequence
Peptides	Number of peptides whitch spectrum hit
PSMs	Number of spectrum which protein matched
Unique peptides	Number of identified peptides that only come form this protein groups
Header line description of worksheet "Peptide_quant"
ID	Identified peptide index number
Sequence	Identified peptide amino acid sequence
Protein accession	Protein accession number of database used for search
Protein description	Protein functional description
Charge	Carried charge of peptide
m/z	Mass-to-charge ratio of peptide
mass error [ppm]	Parts per million ratio of peptide mass error between the theory and practice
PEP	The maximal posterior error probability for peptides
Score	A simple rule to be used to judge whether a result is significant or not
Unique [yes/no]	When marked with 'yes', this particular peptide is unique to a single identified protein group

## Sheet: Protein_quant
Protein accession	Protein description	Gene name	MW [kDa]	Coverage [%]	Peptides	PSMs	Unique peptides	B1	B2	B3	B4	B5	G1	G2	G3	G4	G5	G/B Ratio	G/B P value
A0A023NDA9	Cytochrome c oxidase subunit II (Fragment) OS=Capra hircus OX=9925 GN=COX2 PE=4 SV=1	COX2	17.849	16.8	2	2	2	1.563	0.679	1.877	1.069	0.73	0.848	1.063	0.936	0.674	1.044	0.771	0.40256
A0A059TZ04	Beta-defensin 132 OS=Capra hircus OX=9925 GN=DEFB132 PE=2 SV=1	DEFB132	9.055	18.3	2	4	2	0.923	0.889	0.685	0.97	0.823	1.705	1.307	1	1.186	0.94	1.431	0.022976
A0A059U1E1	Beta-defensin OS=Capra hircus OX=9925 PE=2 SV=1	---	7.5138	21.9	2	3	2	1.515	1.115	0.93	1.483	1.371	0.655	0.483	0.822	0.409	0.904	0.51	0.0043376
A0A059U1E3	Lipocalin 8 OS=Capra hircus OX=9925 PE=2 SV=1	---	19.382	37	5	18	5	2.233	0.66	0.642	2.435	0.73	1.007	0.73	0.728	0.655	0.604	0.556	0.2604
A0A059U2L0	Beta-defensin OS=Capra hircus OX=9925 GN=DEFB126 PE=2 SV=1	DEFB126	9.7333	48.4	8	73	8	1.061	0.918	0.802	1.032	1.084	1.241	1.192	0.861	0.951	1.031	1.077	0.44334
A0A059U2L1	Lipocalin OS=Capra hircus OX=9925 GN=LOC108637125 PE=2 SV=1	LOC108637125	19.466	48.9	11	72	11	0.846	0.846	0.652	0.88	1.053	1.703	1.429	0.838	1.067	0.943	1.398	0.07506
A0A059U2V4	Beta-defensin OS=Capra hircus OX=9925 GN=DEFB119 PE=2 SV=1	DEFB119	9.1909	17.7	2	7	2	0.729	0.823	0.492	0.746	1.071	1.889	0.865	1.057	1.146	1.274	1.614	0.030138
A0A059U2V6	Beta-defensin OS=Capra hircus OX=9925 GN=LOC106502770 PE=2 SV=1	LOC106502770	10.593	32.6	6	16	6	0.731	0.959	0.611	0.759	0.988	1.441	1.43	0.987	1.374	0.963	1.53	0.010615
A0A060INS8	Cathepsin H OS=Capra hircus OX=9925 GN=CTSH PE=2 SV=1	CTSH	37.387	15.8	5	5	5	0.801	0.87	0.694	0.695	0.916	1.607	1.171	1.171	1.401	1.11	1.625	0.000662
A0A097C2Z0	60S acidic ribosomal protein P0 OS=Capra hircus OX=9925 GN=RPLP0 PE=2 SV=1	RPLP0	34.342	19.2	6	6	6	1.639	0.935	0.536	1.847	0.639	1.217	0.71	0.609	0.822	0.668	0.719	0.40384
A0A097C2Z1	Tyrosine 3-monooxygenase/tryptophan 5-monooxygenase activation protein zeta polypeptide (Fragment) OS=Capra hircus OX=9925 GN=YWHAZ PE=2 SV=1	YWHAZ	27.745	49	15	71	11	1.043	1.042	0.824	1.028	1.008	1.312	1.255	0.803	0.924	1.037	1.078	0.5607
A0A0D3RWY9	Eukaryotic translation initiation factor 2 subunit 3 structural gene Y-linked OS=Capra hircus OX=9925 GN=Eif2s3y PE=2 SV=1	Eif2s3y	51.176	5.5	3	3	3	1.65	0.95	0.803	1.708	0.911	1.507	0.595	0.764	0.773	0.781	0.734	0.199297
A0A0K0QVA4	Chemerin OS=Capra hircus OX=9925 GN=RARRES2 PE=2 SV=1	RARRES2	18.361	6.8	1	1	1	0.887	1.282	1.29	0.835	1.039	0.711	1.178	1.211	1.096	0.951	0.965	0.78728
A0A1Q1N997	Proteasome subunit beta (Fragment) OS=Capra hircus OX=9925 GN=PSMB1 PE=2 SV=1	PSMB1	26.362	42.3	10	24	10	1.158	1.036	0.975	1.087	1.083	1.139	0.995	0.898	0.959	0.927	0.921	0.132438
A0A344X8B1	Small peptide transporter (Fragment) OS=Capra hircus OX=9925 GN=SLC15A1 PE=2 SV=1	SLC15A1	74.479	2.2	1	1	1
A0A3B8DGC7	Adaptor related protein complex 1 mu 1 subunit OS=Capra hircus OX=9925 GN=AP1M1 PE=2 SV=1	AP1M1	48.586	28.4	12	16	12	1.016	0.913	0.956	1.054	0.909	1.026	1.215	1.136	0.848	1.062	1.091	0.26274
A0A452DJW3	Acyl-CoA synthetase long chain family member 4(predicted) OS=Capra hircus OX=9925 GN=ACSL4 PE=4 SV=1	ACSL4	74.476	10	5	5	5	0.97	0.98	0.77	0.941	1.378	1.108	0.679	0.884	1.434	0.907	0.995	0.90818
A0A452DJW6	Annexin A8(predicted) OS=Capra hircus OX=9925 GN=LOC102176495 PE=4 SV=1	LOC102176495	36.813	10.7	3	3	3	0.821	0.944	1.277	0.82	0.839	0.917	1.175	1.099	1.136	1.047	1.143	0.164002
A0A452DJZ6	Cytosolic non-specific dipeptidase(predicted) OS=Capra hircus OX=9925 GN=CNDP2 PE=4 SV=1	CNDP2	52.728	35.2	13	20	13	0.974	1.078	0.987	1.023	1.133	0.974	0.921	0.952	1.283	1.064	1	0.93004
A0A452DK08	putative IQ motif and ankyrin repeat domain-containing protein LOC642574 homolog(predicted) OS=Capra hircus OX=9925 GN=IQANK1 PE=4 SV=1	IQANK1	63.58	21.8	9	10	9	0.863	0.819	0.862	1.004	0.811	1.023	1.438	1.242	1.005	1.272	1.372	0.0041991
A0A452DK19	Protein phosphatase, Mg2+/Mn2+ dependent 1F(predicted) OS=Capra hircus OX=9925 GN=PPM1F PE=4 SV=1	PPM1F	45.501	3.8	1	1	1
A0A452DK41	ARHGAP4 protein(predicted) OS=Capra hircus OX=9925 GN=ARHGAP4 PE=4 SV=1	ARHGAP4	105.18	0.8	1	2	1	1.84	0.864	1.167	1.58	1.139	1.136	0.929	0.722	0.629	0.451	0.587	0.029715
A0A452DKA9	four and a half LIM domains protein 1 isoform X8(predicted) OS=Capra hircus OX=9925 PE=4 SV=1	---	8.8953	52.6	6	10	6	0.879	0.842	0.795	0.924	0.766	1.471	1.337	1.077	1.15	1.3	1.506	0.00024205
A0A452DKC0	fibrous sheath-interacting protein 2-like(predicted) OS=Capra hircus OX=9925 PE=4 SV=1	---	18.623	4.5	1	1	1	0.673	0.975	0.669	0.842	0.878	1.721	1.508	0.882	0.896	1.347	1.574	0.025123
A0A452DKF9	ACOT13(predicted) OS=Capra hircus OX=9925 PE=4 SV=1	---	13.761	16.3	2	5	1	1.717	1.09	0.848	1.074	0.931	0.858	0.71	0.565	0.66	1.857	0.822	0.30474
A0A452DKG5	chitinase domain-containing protein 1 isoform X2(predicted) OS=Capra hircus OX=9925 GN=CHID1 PE=4 SV=1	CHID1	11.506	30	3	4	3	1.126	0.838	0.879	0.854	0.811	0.732	1.146	1.333	1.304	1.262	1.281	0.102021
A0A452DKI8	Alpha-(1,3)-fucosyltransferase(predicted) OS=Capra hircus OX=9925 GN=FUT11 PE=4 SV=1	FUT11	55.624	8.7	3	3	3	0.842	1.118	1.085	0.952	0.936	0.817	0.867	2.195	0.956	0.872	1.157	0.73184
A0A452DKK9	Trypsin-like serine protease-like protein(predicted) OS=Capra hircus OX=9925 PE=4 SV=1	---	32.616	7.7	2	2	2
A0A452DKP1	Lysosome-associated membrane glycoprotein 1(predicted) OS=Capra hircus OX=9925 GN=LAMP1 PE=4 SV=1	LAMP1	43.961	8.1	4	5	4	1.776	0.889	0.689	1.822	0.839	1.088	0.775	0.675	0.837	0.843	0.701	0.22684
A0A452DKP9	Stromal cell-derived factor 2-like protein 1(predicted) OS=Capra hircus OX=9925 GN=SDF2L1 PE=4 SV=1	SDF2L1	23.613	13.6	4	5	4	1.748	0.752	0.624	1.746	0.693	1.802	0.799	0.791	0.8	0.819	0.901	0.8445
A0A452DKQ0	APC down-regulated 1(predicted) OS=Capra hircus OX=9925 GN=APCDD1 PE=4 SV=1	APCDD1	58.221	26.4	11	17	11	0.825	1.18	1.228	0.887	1.073	0.721	0.994	1.531	1.107	0.802	0.993	0.8445
A0A452DKR6	Outer dense fiber protein 3(predicted) OS=Capra hircus OX=9925 GN=ODF3 PE=4 SV=1	ODF3	27.568	5.1	1	1	1	1.139	1.144	1.013	1.217	1.131	0.575	0.806	1.415	1.093	0.966	0.86	0.27792
A0A452DKU0	40S ribosomal protein S24(predicted) OS=Capra hircus OX=9925 GN=RPS24 PE=4 SV=1	RPS24	15.197	11.5	1	1	1
A0A452DKU9	vinculin isoform X1(predicted) OS=Capra hircus OX=9925 GN=VCL PE=4 SV=1	VCL	116.71	18.7	19	21	19	1.09	1.034	1.046	1.187	1.128	0.942	0.95	0.951	0.95	0.979	0.87	0.006162
A0A452DKW0	Putative serine protease(predicted) OS=Capra hircus OX=9925 PE=4 SV=1	---	23.838	23.8	4	6	4	2.076	1.365	1.086	1.654	1.449	0.454	0.61	0.567	0.654	0.705	0.392	0.000102995
A0A452DKW7	Coiled-coil domain containing 116(predicted) OS=Capra hircus OX=9925 GN=CCDC116 PE=4 SV=1	CCDC116	59.047	3.9	2	2	2	0.805	0.979	0.916	0.913	1.372	1.505	1.069	0.929	1.114	0.831	1.093	0.54556
A0A452DKX4	SERPINA3-6(predicted) OS=Capra hircus OX=9925 PE=4 SV=1	---	12.357	29.6	3	5	1	2.827	0.83	1.117	1.88	0.916	0.589	0.489	0.693	0.658	0.454	0.381	0.0079373
A0A452DKY9	ubiquitin fusion degradation protein 1 homolog isoform X2(predicted) OS=Capra hircus OX=9925 GN=UFD1 PE=4 SV=1	UFD1	34.839	17	4	5	4	0.962	1.002	0.856	1.078	1.058	1.309	1.079	0.954	0.979	1.191	1.112	0.193823
A0A452DL24	Progesterone receptor membrane component 1(predicted) OS=Capra hircus OX=9925 GN=PGRMC1 PE=4 SV=1	PGRMC1	21.632	11.9	3	3	3	0.854	1.025	1.066	0.775	0.865	0.854	1.368	1.572	1.095	1.041	1.293	0.084002
A0A452DL31	Non-POU domain containing, octamer-binding protein (Fragment)(predicted) OS=Capra hircus OX=9925 GN=NONO PE=4 SV=1	NONO	49.136	2.6	1	1	1
A0A452DL42	Thioredoxin reductase 2, mitochondrial(predicted) OS=Capra hircus OX=9925 GN=TXNRD2 PE=4 SV=1	TXNRD2	52.868	30.7	11	13	10	1.556	1.189	1.404	1.459	1.084	0.773	0.696	0.706	0.85	0.809	0.573	0.000100559
A0A452DL46	structural maintenance of chromosomes flexible hinge domain-containing protein 1 isoform X1(predicted) OS=Capra hircus OX=9925 GN=SMCHD1 PE=4 SV=1	SMCHD1	224.01	0.5	1	1	1	0.807	1.595	1.528	0.802	1.243	0.339	0.463	1.587	1.126	1.068	0.767	0.28524
A0A452DL52	ATP-dependent 6-phosphofructokinase(predicted) OS=Capra hircus OX=9925 GN=PFKL PE=4 SV=1	PFKL	81.988	7.1	5	6	2
A0A452DL53	Lysosomal-trafficking regulator(predicted) OS=Capra hircus OX=9925 GN=LYST PE=4 SV=1	LYST	426.45	0.4	1	1	1	0.978	0.681	0.412	0.918	0.891	2.184	1.608	0.816	1.162	0.745	1.679	0.099379
A0A452DL63	collagen alpha-5(IV) chain isoform X1(predicted) OS=Capra hircus OX=9925 PE=4 SV=1	---	57.361	1.8	1	2	1
A0A452DL66	cysteine-rich protein 1 isoform X2(predicted) OS=Capra hircus OX=9925 GN=CRIP1 PE=4 SV=1	CRIP1	8.5027	10.4	1	1	1	0.721	0.596	0.941	0.544	0.749	1.38	1.158	1.466	1.497	1.414	1.947	0.00020081
A0A452DL82	Annexin(predicted) OS=Capra hircus OX=9925 GN=ANXA11 PE=4 SV=1	ANXA11	53.963	14.5	7	9	6	1.06	1.061	0.964	1.083	1.091	1.114	0.832	1.359	0.972	0.918	0.988	0.78104
A0A452DLA1	Plasminogen activator(predicted) OS=Capra hircus OX=9925 GN=PLAT PE=4 SV=1	PLAT	62.645	3.4	2	3	2	0.7	0.552	0.564	0.46	0.404	1.178	0.668	1.35	2.119	2.54	2.931	0.0044648
A0A452DLA3	Cysteine-rich with EGF-like domain protein 2(predicted) OS=Capra hircus OX=9925 GN=CRELD2 PE=4 SV=1	CRELD2	38.068	29.1	9	13	9	1.398	0.738	0.688	1.401	0.816	1.359	0.878	0.917	0.914	1.014	1.008	0.80616
A0A452DLC3	Vesicle-associated membrane protein-associated protein A(predicted) OS=Capra hircus OX=9925 GN=VAPA PE=4 SV=1	VAPA	27.814	34.9	9	15	8	1.551	1.441	1.178	1.353	1.368	0.802	0.676	0.595	0.686	0.755	0.51	4.6256e-06
A0A452DLD0	Cullin 4A(predicted) OS=Capra hircus OX=9925 GN=CUL4A PE=4 SV=1	CUL4A	88.335	7.9	6	7	2	1.012	0.885	1.001	0.905	0.924	1.102	1.237	1.127	1.118	1.129	1.209	0.00051702
A0A452DLE1	Glutamate dehydrogenase 1, mitochondrial(predicted) OS=Capra hircus OX=9925 GN=GLUD1 PE=4 SV=1	GLUD1	61.586	4.3	2	2	2	1.344	0.912	1.752	1.17	0.988	0.83	0.833	0.855	0.852	0.934	0.698	0.047997
A0A452DLG8	14 kDa phosphohistidine phosphatase(predicted) OS=Capra hircus OX=9925 GN=PHPT1 PE=4 SV=1	PHPT1	13.888	34.4	4	5	4	1.304	0.794	0.701	1.541	0.787	1.412	0.894	0.834	1.388	0.678	1.015	0.91462
A0A452DLH9	Ubiquitin conjugating enzyme E2 L3(predicted) OS=Capra hircus OX=9925 GN=UBE2L3 PE=4 SV=1	UBE2L3	16.944	19.9	2	3	2	1.176	0.845	1.105	0.926	0.881	0.967	0.927	1.029	1.195	1.038	1.045	0.54732
A0A452DLK4	Gamma-glutamyltransferase 5(predicted) OS=Capra hircus OX=9925 GN=GGT5 PE=4 SV=1	GGT5	60.815	4	2	2	2	0.817	1.19	0.747	1.108	0.982	0.6	0.701	1.818	1.139	1.421	1.172	0.70312
A0A452DLL2	Testis specific serine kinase 2 OS=Capra hircus OX=9925 GN=TSSK2 PE=4 SV=1	TSSK2	40.733	17.9	6	8	6	1.157	0.985	1.194	1.037	1.081	0.833	0.981	0.913	0.964	1.092	0.877	0.047062
A0A452DLL7	MGC152348 protein(predicted) OS=Capra hircus OX=9925 PE=4 SV=1	---	30.398	38.4	7	10	7	1.286	1.055	1.008	1.161	1.116	0.913	0.897	0.829	0.978	0.871	0.798	0.0020559
A0A452DLM2	Spermadhesin-1(predicted) OS=Capra hircus OX=9925 GN=LOC102175091 PE=4 SV=1	LOC102175091	14.978	78.4	9	57	9	0.701	0.751	0.612	0.741	0.906	1.981	1.524	0.867	1.317	0.811	1.752	0.022101
A0A452DLN9	Probable inactive serine protease 37(predicted) OS=Capra hircus OX=9925 GN=PRSS37 PE=4 SV=1	PRSS37	26.263	6.8	1	1	1
A0A452DLP5	LOC790886 protein(predicted) OS=Capra hircus OX=9925 PE=4 SV=1	---	40.987	6.4	4	5	2	0.851	0.862	1.606	0.976	0.94	0.697	1.084	1.481	1.01	1.025	1.012	0.93618
A0A452DLP6	Jumonji domain containing 8(predicted) OS=Capra hircus OX=9925 GN=JMJD8 PE=4 SV=1	JMJD8	28.541	14.5	4	4	4	0.708	0.56	0.617	0.748	0.703	1.993	2.046	1.093	1.21	0.754	2.127	0.024678
A0A452DLQ9	Enoyl-CoA hydratase, mitochondrial(predicted) OS=Capra hircus OX=9925 GN=ECHS1 PE=4 SV=1	ECHS1	31.105	30.7	9	11	9	1.538	0.957	0.903	1.028	0.845	1.136	0.972	0.751	0.892	1.361	0.97	0.85638
A0A452DLS3	transmembrane protein 109(predicted) OS=Capra hircus OX=9925 GN=TMEM109 PE=4 SV=1	TMEM109	26.223	6.2	1	1	1	1.194	1.054	1.199	0.993	0.823	0.805	1.147	1.07	1.215	0.953	0.986	0.88534
A0A452DLT7	Hexokinase-1(predicted) OS=Capra hircus OX=9925 GN=HK1 PE=4 SV=1	HK1	102.22	46	48	107	47	1.052	1.019	0.983	0.957	1.176	0.965	1.041	0.83	0.959	1.26	0.975	0.6828
A0A452DLV8	POFUT2(predicted) OS=Capra hircus OX=9925 GN=POFUT2 PE=4 SV=1	POFUT2	49.688	8.4	5	5	5	0.854	1.033	0.769	0.834	0.938	1.058	1.17	1.405	1.367	1.044	1.365	0.0049825
A0A452DLX8	Protein FAM75D1(predicted) OS=Capra hircus OX=9925 PE=4 SV=1	---	166.92	2.3	3	4	3	1.276	1.193	1.446	1.123	1.892	0.456	0.478	0.498	0.685	0.847	0.428	0.00046212
A0A452DLY4	cob(I)yrinic acid a,c-diamide adenosyltransferase, mitochondrial(predicted) OS=Capra hircus OX=9925 GN=MMAB PE=4 SV=1	MMAB	26.823	4.1	1	1	1
A0A452DM15	Calnexin (Fragment)(predicted) OS=Capra hircus OX=9925 GN=CANX PE=4 SV=1	CANX	67.79	6.6	4	4	4	0.929	1.151	1.252	0.899	1.215	0.725	0.946	1.266	1.176	0.926	0.925	0.48946
A0A452DM41	Potassium channel modulatory factor 1(predicted) OS=Capra hircus OX=9925 GN=KCMF1 PE=4 SV=1	KCMF1	38.077	3.2	1	1	1	0.831	0.955	0.783	0.974	0.901	0.923	1.36	1.243	1.219	1.241	1.347	0.0054637
A0A452DM49	2-oxoglutarate and iron dependent oxygenase domain containing 2(predicted) OS=Capra hircus OX=9925 GN=OGFOD2 PE=4 SV=1	OGFOD2	39.228	6.9	2	2	2	0.857	0.973	1.113	0.866	0.738	0.927	1.06	1.437	1.19	1.326	1.306	0.034516
A0A452DM53	2-oxoglutarate and iron dependent oxygenase domain containing 3(predicted) OS=Capra hircus OX=9925 GN=OGFOD3 PE=4 SV=1	OGFOD3	34.946	13.7	4	5	4	1.086	1.036	1.525	0.952	0.934	0.769	0.868	1.241	0.869	0.824	0.826	0.158898
A0A452DM80	Ectonucleotide pyrophosphatase/phosphodiesterase family member 3(predicted) OS=Capra hircus OX=9925 GN=ENPP3 PE=4 SV=1	ENPP3	99.319	35.8	26	57	25	1.023	1.109	0.967	0.973	1.284	1.444	0.699	0.926	1.08	0.903	0.943	0.54866
A0A452DMC5	Hsp90 co-chaperone Cdc37(predicted) OS=Capra hircus OX=9925 GN=CDC37 PE=4 SV=1	CDC37	44.58	22.9	6	7	6	1.07	0.604	0.652	1.186	0.644	1.726	1.232	1.058	0.986	1.219	1.497	0.038642
A0A452DMD1	Late cornified envelope-like proline-rich protein 1(predicted) OS=Capra hircus OX=9925 GN=LELP1 PE=4 SV=1	LELP1	11.085	46.6	5	7	5	1.956	0.818	1.093	2.152	0.882	0.885	0.646	0.621	0.743	0.689	0.519	0.05132
A0A452DMD4	Neuron navigator 2(predicted) OS=Capra hircus OX=9925 GN=NAV2 PE=4 SV=1	NAV2	253	0.3	1	2	1	0.846	0.975	1.693	0.939	0.958	0.883	1.004	1.299	0.988	0.94	0.945	0.82314
A0A452DME8	14-3-3 protein sigma(predicted) OS=Capra hircus OX=9925 GN=SFN PE=4 SV=1	SFN	27.849	16.9	4	12	2	0.771	1.157	2.06	0.981	0.98	0.914	0.823	0.85	0.876	1.339	0.807	0.38836
A0A452DMI1	ARSB protein(predicted) OS=Capra hircus OX=9925 GN=ARSB PE=4 SV=1	ARSB	59.044	17.9	7	10	7	1.097	1.045	1.005	1.161	1.135	1.118	0.771	1.272	0.929	0.846	0.907	0.29954
A0A452DMK2	Prostaglandin G/H synthase 1(predicted) OS=Capra hircus OX=9925 GN=PTGS1 PE=4 SV=1	PTGS1	68.292	12.3	7	7	7	0.873	1.352	1.468	0.932	1.115	0.595	0.803	1.133	0.894	1.075	0.784	0.143965
A0A452DMM0	Ribophorin II(predicted) OS=Capra hircus OX=9925 GN=RPN2 PE=4 SV=1	RPN2	55.755	4.5	1	2	1	0.914	1.062	1.212	0.94	0.951	0.754	1.019	1.303	1.188	1.135	1.063	0.65554
A0A452DMM6	Disintegrin and metalloproteinase domain-containing protein 32 (Fragment)(predicted) OS=Capra hircus OX=9925 GN=ADAM32 PE=4 SV=1	ADAM32	83.32	19.8	15	21	15	1.591	1.099	1.318	1.562	1.293	0.71	0.738	0.59	0.687	0.71	0.501	2.1475e-05
A0A452DMQ9	interferon-induced very large GTPase 1-like(predicted) OS=Capra hircus OX=9925 GN=LOC102184922 PE=4 SV=1	LOC102184922	267.9	0.6	1	1	1	1.125	1.225	1.465	1.173	1.373	0.592	0.756	1.194	0.952	0.658	0.653	0.0102776
A0A452DMV7	Polypeptide N-acetylgalactosaminyltransferase(predicted) OS=Capra hircus OX=9925 GN=GALNT5 PE=4 SV=1	GALNT5	101.6	8.1	7	7	6	0.626	1.191	0.663	0.62	1.338	0.81	1.435	1.15	1.524	0.715	1.269	0.29626
A0A452DMW4	60S ribosomal protein L13(predicted) OS=Capra hircus OX=9925 GN=RPL13 PE=4 SV=1	RPL13	24.291	10.4	2	2	2	1.205	0.942	1.166	1.534	0.975	0.777	0.706	1.276	0.953	0.966	0.804	0.133577
A0A452DMX8	Staufen double-stranded RNA binding protein 1(predicted) OS=Capra hircus OX=9925 GN=STAU1 PE=4 SV=1	STAU1	62.924	9.7	5	7	5	0.782	1.032	1.102	0.893	1.009	0.808	0.975	1.546	1.111	1.111	1.152	0.33336
A0A452DMY8	Slit-like 2(predicted) OS=Capra hircus OX=9925 GN=VASN PE=4 SV=1	VASN	71.454	6.4	4	4	4	1.237	1.13	0.956	1.354	1.077	0.9	0.918	0.976	0.872	0.788	0.774	0.0065612
A0A452DN41	CDGSH iron sulfur domain 3(predicted) OS=Capra hircus OX=9925 GN=CISD3 PE=4 SV=1	CISD3	13.918	16.5	2	2	2	1.207	1.004	1.372	1.046	0.872	0.812	0.896	0.994	1.007	1.236	0.899	0.34872
A0A452DN51	Trafficking protein particle complex subunit 5(predicted) OS=Capra hircus OX=9925 GN=TRAPPC5 PE=4 SV=1	TRAPPC5	20.767	13.3	3	3	3	0.733	0.706	0.853	0.739	0.758	1.267	1.657	1.131	1.214	1.349	1.747	6.1676e-05
A0A452DN57	Dynein regulatory complex protein 1(predicted) OS=Capra hircus OX=9925 GN=DRC1 PE=4 SV=1	DRC1	84.084	1.4	1	1	1	1.786	1.029	1.037	1.777	1.203	0.659	0.544	0.874	0.835	0.707	0.53	0.0034227
A0A452DN79	Serine protease 55(predicted) OS=Capra hircus OX=9925 PE=4 SV=1	---	28.409	41.7	8	26	8	0.994	0.899	0.807	1.05	1.013	1.388	0.99	0.859	1.033	1.21	1.151	0.20934
A0A452DN90	Inactive ribonuclease-like protein 10(predicted) OS=Capra hircus OX=9925 GN=RNASE10 PE=4 SV=1	RNASE10	23.57	28.2	6	13	6	1.591	0.759	0.919	1.712	0.795	1.184	0.853	0.838	0.628	1.026	0.784	0.3479
A0A452DN93	Collectrin(predicted) OS=Capra hircus OX=9925 GN=CLTRN PE=4 SV=1	CLTRN	25.307	5.9	1	1	1
A0A452DN94	phosphatidylinositol transfer protein beta isoform isoform X3(predicted) OS=Capra hircus OX=9925 GN=PITPNB PE=4 SV=1	PITPNB	31.539	13.3	4	6	1	1.262	1.526	1.127	1.091	1.447	0.98	0.819	0.572	0.844	0.744	0.614	0.0021229
A0A452DNA3	Coiled-coil domain containing 136(predicted) OS=Capra hircus OX=9925 GN=CCDC136 PE=4 SV=1	CCDC136	130.85	13.4	12	13	12	1.636	1.219	1.104	1.512	1.455	0.583	0.459	0.61	0.601	0.615	0.414	1.55887e-05
A0A452DNC1	Aquaporin 7(predicted) OS=Capra hircus OX=9925 GN=AQP7 PE=4 SV=1	AQP7	35.97	12.4	4	12	4	1.433	1.176	1.19	1.361	1.36	0.666	0.699	0.878	0.827	0.838	0.599	6.0668e-05
A0A452DNE7	Actin-like protein 7A(predicted) OS=Capra hircus OX=9925 GN=ACTL7A PE=4 SV=1	ACTL7A	49.064	16.4	6	6	6	1.23	0.986	1.97	1.122	1.109	0.811	0.673	0.744	0.654	0.888	0.588	0.0051831
A0A452DNE8	Tubulin polymerization-promoting protein family member 2(predicted) OS=Capra hircus OX=9925 GN=TPPP2 PE=4 SV=1	TPPP2	18.503	80.1	18	72	18	0.814	0.917	0.619	0.765	0.987	1.672	1.453	0.823	1.042	1.248	1.521	0.026722
A0A452DNG0	Serine/threonine-protein phosphatase(predicted) OS=Capra hircus OX=9925 GN=PPP6C PE=4 SV=1	PPP6C	35.144	9.8	3	3	3	0.997	0.896	1.259	0.99	0.858	1.047	1.082	1.253	1.09	1.116	1.118	0.144619
A0A452DNH8	Kinesin-like protein(predicted) OS=Capra hircus OX=9925 GN=KIF23 PE=4 SV=1	KIF23	98.851	2.2	1	1	1	0.374	0.702	0.654	0.417	0.419	1.76	2.054	1.615	1.41	1.081	3.087	0.000143568
A0A452DNH9	Tubulin alpha chain(predicted) OS=Capra hircus OX=9925 GN=TUBA4A PE=4 SV=1	TUBA4A	49.47	38.7	14	40	1	0.739	1.12	1.084	1.016	0.895	1.001	1.204	1.449	0.993	1.012	1.166	0.185817
A0A452DNI3	MTHFD1 protein(predicted) OS=Capra hircus OX=9925 GN=MTHFD1 PE=4 SV=1	MTHFD1	101.26	11.9	9	10	9	0.8	0.809	0.908	0.799	0.837	0.969	1.323	1.097	1.263	1.458	1.471	0.00109618
A0A452DNI4	Alpha-mannosidase(predicted) OS=Capra hircus OX=9925 GN=MAN2B1 PE=4 SV=1	MAN2B1	107.2	12.6	10	13	10	1.154	1.159	1.136	0.941	0.999	1.129	0.899	1.053	0.962	0.904	0.918	0.20128
A0A452DNJ5	Maestro heat like repeat family member 2B(predicted) OS=Capra hircus OX=9925 PE=4 SV=1	---	66.927	21	14	25	14	0.719	0.721	0.864	0.658	0.725	1.036	1.49	1.25	1.306	1.558	1.801	0.000123633
A0A452DNK3	armadillo repeat-containing protein 8 isoform X1(predicted) OS=Capra hircus OX=9925 GN=ARMC8 PE=4 SV=1	ARMC8	72.454	7	4	4	4	0.881	0.692	0.953	0.945	0.763	1.251	1.238	1.227	1.262	1.232	1.467	0.0034408
A0A452DNL3	G protein subunit beta 2 OS=Capra hircus OX=9925 GN=GNB2 PE=4 SV=1	GNB2	37.331	20.6	6	9	4	1.13	1.042	1.042	1.14	1.221	0.9	0.912	0.907	0.977	0.85	0.815	0.00061735
A0A452DNL7	MBTPS1 protein(predicted) OS=Capra hircus OX=9925 GN=MBTPS1 PE=4 SV=1	MBTPS1	118.16	9.5	9	12	9	0.828	1.191	1.243	0.828	1.014	0.794	1.185	1.378	0.997	0.912	1.032	0.83946
A0A452DNU3	matrix metalloproteinase-15 isoform X2(predicted) OS=Capra hircus OX=9925 GN=MMP15 PE=4 SV=1	MMP15	74.726	2.1	1	2	1	0.801	1.461	1.165	0.852	1.019	0.683	0.785	1.194	1.436	1.069	0.975	0.83626
A0A452DNW9	V-type proton ATPase subunit E 2(predicted) OS=Capra hircus OX=9925 GN=ATP6V1E2 PE=4 SV=1	ATP6V1E2	26.154	59.7	15	39	10	0.777	0.949	0.789	0.773	0.878	1.28	1.466	1.02	1.23	1.201	1.488	0.00054446
A0A452DNY5	Sialin(predicted) OS=Capra hircus OX=9925 GN=SLC17A5 PE=4 SV=1	SLC17A5	54.678	3	2	2	2
A0A452DNY6	LOW QUALITY PROTEIN: nuclease-sensitive element-binding protein 1-like(predicted) OS=Capra hircus OX=9925 PE=4 SV=1	---	34.718	2.2	1	1	1
A0A452DNZ6	Actin-like protein 7B(predicted) OS=Capra hircus OX=9925 GN=ACTL7B PE=4 SV=1	ACTL7B	45.485	12.2	4	5	4	1.497	1.113	1.14	1.088	1.213	0.878	1.005	0.933	0.877	0.806	0.744	0.002741
A0A452DP37	Golgi associated, gamma adaptin ear containing, ARF binding protein 3(predicted) OS=Capra hircus OX=9925 GN=GGA3 PE=4 SV=1	GGA3	76.355	2.7	2	2	2	0.884	0.772	0.783	0.888	0.657	1.309	2.141	1.31	0.874	0.849	1.627	0.040378
A0A452DP52	N-acetylneuraminic acid synthase(predicted) OS=Capra hircus OX=9925 GN=NANS PE=4 SV=1	NANS	40.248	17.8	6	9	6	0.638	0.959	0.617	0.77	0.926	1.738	1.338	0.995	1.128	1.357	1.677	0.0043828
A0A452DP54	Bridging integrator 2(predicted) OS=Capra hircus OX=9925 GN=BIN2 PE=4 SV=1	BIN2	55.038	15.2	6	6	1	0.79	0.798	0.602	0.787	0.72	1.455	1.591	0.832	1.208	1.562	1.798	0.0026781
A0A452DP57	RBR-type E3 ubiquitin transferase(predicted) OS=Capra hircus OX=9925 GN=ARIH1 PE=4 SV=1	ARIH1	64.044	4	2	2	2	1.135	1.192	1.498	1.221	0.771	0.879	0.934	1.109	0.912	0.855	0.806	0.130743
A0A452DP59	CutC copper transporter(predicted) OS=Capra hircus OX=9925 GN=CUTC PE=4 SV=1	CUTC	28.442	25.9	5	5	5	0.766	0.92	0.838	0.84	1	1.512	1.283	0.953	1.072	1.097	1.356	0.0124191
A0A452DP64	Glutathione S-transferase omega-2(predicted) OS=Capra hircus OX=9925 GN=GSTO2 PE=4 SV=1	GSTO2	28.275	3.7	1	1	1	0.992	1.033	1.653	1.097	0.899	0.777	0.794	0.991	1.07	1.159	0.844	0.2659
A0A452DP85	Proline-rich protein 24(predicted) OS=Capra hircus OX=9925 GN=INAFM1 PE=4 SV=1	INAFM1	14.776	29.7	3	3	3	0.293	1.328	0.504	0.274	1.094	0.471	1.426	1.133	1.358	2.429	1.952	0.112798
A0A452DP87	Beta-defensin(predicted) OS=Capra hircus OX=9925 PE=4 SV=1	---	7.7061	26.1	2	2	2
A0A452DP98	Leucyl-tRNA synthetase 2, mitochondrial(predicted) OS=Capra hircus OX=9925 GN=LARS2 PE=4 SV=1	LARS2	101.96	0.8	1	1	1	0.615	0.774	3.255	0.82	2.493	0.474	0.575	0.556	0.507	0.447	0.322	0.057505
A0A452DPA0	Rab9 effector protein with kelch motifs(predicted) OS=Capra hircus OX=9925 GN=RABEPK PE=4 SV=1	RABEPK	40.293	15.9	4	4	4	0.949	0.843	0.935	1.074	0.954	1.397	1.196	1.108	0.932	1.067	1.199	0.052382
A0A452DPA5	CD59 glycoprotein(predicted) OS=Capra hircus OX=9925 GN=CD59 PE=4 SV=1	CD59	13.603	27.9	4	10	4	1.419	1.147	1.178	1.207	1.226	1.105	0.663	0.821	0.821	0.752	0.674	0.0022205
A0A452DPA6	WD repeat-containing protein 7(predicted) OS=Capra hircus OX=9925 GN=WDR7 PE=4 SV=1	WDR7	159.99	2.1	3	3	3	0.762	0.74	0.873	0.76	0.858	0.73	1.594	1.724	1.486	0.972	1.629	0.059338
A0A452DPC8	WAP four-disulfide core domain protein 5(predicted) OS=Capra hircus OX=9925 GN=WFDC5 PE=4 SV=1	WFDC5	12.678	28	3	3	3	1.616	1.051	1.023	1.752	0.963	0.973	0.782	0.655	0.978	0.629	0.627	0.020735
A0A452DPF2	Protein phosphatase, Mg2+/Mn2+ dependent 1L OS=Capra hircus OX=9925 GN=PPM1L PE=4 SV=1	PPM1L	26.36	4.7	2	2	2	0.834	0.929	0.918	0.729	1.181	0.858	1.315	1.35	1.288	1.055	1.278	0.071324
A0A452DPH5	Eukaryotic translation initiation factor 3 subunit G(predicted) OS=Capra hircus OX=9925 GN=EIF3G PE=4 SV=1	EIF3G	35.611	10.6	3	3	3	1.382	0.915	0.822	1.493	0.853	1.228	0.973	0.834	1.046	0.873	0.906	0.61716
A0A452DPJ4	DnaJ homolog subfamily C member 10(predicted) OS=Capra hircus OX=9925 GN=DNAJC10 PE=4 SV=1	DNAJC10	91.257	14.8	10	12	10	0.898	0.998	1.129	0.955	0.907	0.758	1.078	1.627	1.132	1.045	1.154	0.3893
A0A452DPJ7	Fumarate hydratase(predicted) OS=Capra hircus OX=9925 GN=FH PE=4 SV=1	FH	54.621	44.5	21	52	21	1.798	1.002	1.347	1.467	1.03	0.745	0.767	0.609	0.632	0.825	0.539	0.00131883
A0A452DPP1	Mitochondrial import inner membrane translocase subunit TIM50(predicted) OS=Capra hircus OX=9925 GN=TIMM50 PE=4 SV=1	TIMM50	39.675	10.3	3	3	3	1.023	1.11	0.975	1.453	1.323	0.705	0.943	1.024	0.955	0.928	0.774	0.035298
A0A452DPP7	Testis-expressed protein 101(predicted) OS=Capra hircus OX=9925 GN=TEX101 PE=4 SV=1	TEX101	27.214	51	12	42	12	1.12	0.909	0.756	1.14	1.07	1.178	1.091	0.807	1.007	1.279	1.073	0.54208
A0A452DPQ2	Relaxin-3 (Fragment)(predicted) OS=Capra hircus OX=9925 GN=RLN3 PE=4 SV=1	RLN3	14.754	55.9	14	73	14	1.295	0.695	2.087	1.307	0.685	0.702	0.499	1.067	1.161	0.797	0.696	0.2601
A0A452DPQ8	Cystatin(predicted) OS=Capra hircus OX=9925 GN=LOC102173204 PE=4 SV=1	LOC102173204	15.071	13.8	1	2	1	2.026	0.566	0.554	2.161	0.736	0.987	0.695	0.967	0.933	0.806	0.726	0.6744
A0A452DPV3	Phosphoglycerate kinase(predicted) OS=Capra hircus OX=9925 GN=PGK2 PE=4 SV=1	PGK2	44.7	79.1	38	177	28	0.704	0.83	0.618	0.711	0.83	1.681	1.545	0.889	1.068	1.405	1.784	0.0028551
A0A452DPX9	WD repeat domain 78(predicted) OS=Capra hircus OX=9925 GN=WDR78 PE=4 SV=1	WDR78	91.191	2	1	1	1
A0A452DPZ2	LRP10 protein(predicted) OS=Capra hircus OX=9925 GN=LRP10 PE=4 SV=1	LRP10	72.597	2.5	2	2	2	0.835	1.215	1.415	0.95	1.078	0.836	1.063	1.237	0.982	0.892	0.912	0.48212
A0A452DPZ6	Probable inactive peptidyl-prolyl cis-trans isomerase-like 6(predicted) OS=Capra hircus OX=9925 GN=PPIL6 PE=4 SV=1	PPIL6	34.729	3.3	1	1	1	1.335	1.058	0.883	1.448	1.037	1.004	1.027	0.981	0.931	0.747	0.814	0.104184
A0A452DQ06	Lon protease homolog, mitochondrial(predicted) OS=Capra hircus OX=9925 GN=LONP1 PE=4 SV=1	LONP1	105.64	1.9	2	2	2	1.447	1.003	1.137	1.284	1.017	0.762	0.938	0.79	0.872	1.156	0.767	0.031003
A0A452DQ07	26S proteasome non-ATPase regulatory subunit 3(predicted) OS=Capra hircus OX=9925 GN=PSMD3 PE=4 SV=1	PSMD3	60.972	41.2	22	39	22	0.791	0.782	0.661	0.786	0.728	1.48	1.46	0.987	1.225	1.359	1.737	0.00016256
A0A452DQA1	Ubiquitin carboxyl-terminal hydrolase(predicted) OS=Capra hircus OX=9925 GN=UCHL5 PE=4 SV=1	UCHL5	37.03	28.6	8	10	8	0.736	0.88	0.694	0.819	0.798	1.302	1.381	1.114	1.156	1.534	1.652	0.000118811
A0A452DQC0	Drebrin 1(predicted) OS=Capra hircus OX=9925 GN=DBN1 PE=4 SV=1	DBN1	71.653	2.4	1	1	1	1.007	0.815	0.891	0.882	0.751	1.099	1.247	1.155	1.182	1.393	1.398	0.00072325
A0A452DQC8	Isocitrate dehydrogenase [NADP](predicted) OS=Capra hircus OX=9925 GN=IDH2 PE=4 SV=1	IDH2	50.71	39.6	20	31	18	1.556	0.989	0.714	1.171	0.943	1.112	0.909	0.718	0.955	1.214	0.913	0.65374
A0A452DQG7	HCG1995540, isoform CRA_c(predicted) OS=Capra hircus OX=9925 GN=RAB4B PE=4 SV=1	RAB4B	23.586	26.3	4	4	4	1.01	0.99	1.1	1.049	0.96	0.923	0.957	1.307	1.055	1.131	1.052	0.53086
A0A452DQI5	Dipeptidyl peptidase 3(predicted) OS=Capra hircus OX=9925 GN=DPP3 PE=4 SV=1	DPP3	83.669	35.6	22	30	22	0.863	0.995	0.892	0.869	1.007	1.293	1.145	0.969	1.066	1.076	1.2	0.0149767
A0A452DQJ7	TCTE3(predicted) OS=Capra hircus OX=9925 GN=TCTE3 PE=4 SV=1	TCTE3	22.656	12.4	2	2	2	1.036	1.262	0.981	0.897	1.37	1.069	0.962	0.948	0.871	1.038	0.881	0.21824
A0A452DQM4	Ferritin(predicted) OS=Capra hircus OX=9925 GN=FTMT PE=4 SV=1	FTMT	27.381	52.9	10	19	10	1.481	0.742	2.091	1.325	0.728	0.646	0.793	0.578	0.728	0.96	0.582	0.065844
A0A452DQM6	Heat shock 60kDa protein(predicted) OS=Capra hircus OX=9925 GN=HSPD1 PE=4 SV=1	HSPD1	60.963	30.4	15	17	15	1.364	0.874	1.28	1.191	0.874	0.854	0.979	0.645	0.796	1.456	0.847	0.2924
A0A452DQP6	Actin, alpha cardiac muscle 1(predicted) OS=Capra hircus OX=9925 GN=ACTC1 PE=4 SV=1	ACTC1	41.657	29.1	10	33	1	0.72	1.057	0.903	0.829	0.957	1.49	0.864	1.093	0.995	1.266	1.278	0.073944
A0A452DQQ7	B-box and SPRY domain containing(predicted) OS=Capra hircus OX=9925 GN=BSPRY PE=4 SV=1	BSPRY	44.146	5.5	2	2	2	1.06	0.759	0.848	1.001	0.838	0.925	1.169	1.225	1.294	1.308	1.314	0.0146993
A0A452DQX3	Actin-like protein 7B(predicted) OS=Capra hircus OX=9925 GN=LOC102177288 PE=4 SV=1	LOC102177288	129.17	7.8	6	7	6	1.438	1.201	1.807	1.367	1.286	0.594	0.485	0.627	0.568	0.617	0.407	2.595e-06
A0A452DQZ3	Cathepsin F(predicted) OS=Capra hircus OX=9925 GN=CTSF PE=4 SV=1	CTSF	50.807	35.9	17	25	17	1.321	1.403	0.868	1.067	1.723	0.874	0.794	0.645	0.75	0.795	0.605	0.0055402
A0A452DR05	Homeodomain-only protein(predicted) OS=Capra hircus OX=9925 GN=HOPX PE=4 SV=1	HOPX	8.2991	13.7	1	1	1
A0A452DR39	carbonyl reductase [NADPH] 1-like(predicted) OS=Capra hircus OX=9925 GN=LOC108633281 PE=4 SV=1	LOC108633281	30.438	37.2	8	8	6	0.848	0.831	0.74	0.838	0.883	1.43	1.24	1.16	1.241	1.266	1.531	1.6653e-05
A0A452DR63	Carbohydrate sulfotransferase(predicted) OS=Capra hircus OX=9925 GN=CHST14 PE=4 SV=1	CHST14	43.208	9.6	4	5	4	0.956	0.869	1.343	0.957	0.962	0.982	0.962	1.41	1.053	0.939	1.051	0.65058
A0A452DR88	Transforming growth factor-beta-induced protein ig-h3(predicted) OS=Capra hircus OX=9925 GN=TGFBI PE=4 SV=1	TGFBI	70.661	1.7	1	1	1	1.065	1.682	1.05	1.235	1.313	0.674	0.754	1.045	0.785	0.872	0.651	0.0055796
A0A452DR91	Phosphoglycerate mutase(predicted) OS=Capra hircus OX=9925 GN=PGAM2 PE=4 SV=1	PGAM2	28.727	68.4	24	117	18	0.969	0.996	0.902	0.984	0.98	1.333	1.242	0.955	0.896	1.055	1.135	0.21146
A0A452DR96	Beta defensin soabd1 (Fragment)(predicted) OS=Capra hircus OX=9925 PE=4 SV=1	---	6.5867	28.3	3	6	3	0.756	1.291	1.097	0.76	1.102	0.446	1.3	1.183	1.425	0.705	1.011	0.83534
A0A452DRA2	Ephrin-A1 (Fragment)(predicted) OS=Capra hircus OX=9925 GN=EFNA1 PE=4 SV=1	EFNA1	23.735	36.1	10	25	10	1.001	1.151	1.566	0.931	1.067	0.77	1.096	1.016	0.994	0.81	0.82	0.130242
A0A452DRA9	60S ribosomal protein L35a(predicted) OS=Capra hircus OX=9925 GN=LOC102169908 PE=4 SV=1	LOC102169908	12.609	22.7	3	3	3
A0A452DRB6	Protein yippee-like(predicted) OS=Capra hircus OX=9925 GN=YPEL4 PE=4 SV=1	YPEL4	13.628	6.7	1	1	1
A0A452DRC0	Galactokinase(predicted) OS=Capra hircus OX=9925 GN=GALK1 PE=4 SV=1	GALK1	42.241	40.1	15	18	15	0.887	0.8	0.785	0.875	0.848	1.175	1.468	0.834	1.096	1.463	1.439	0.033016
A0A452DRD5	Eukaryotic translation initiation factor 3 subunit E(predicted) OS=Capra hircus OX=9925 GN=EIF3E PE=4 SV=1	EIF3E	52.19	6.7	3	3	3	1.15	0.907	1.192	1.179	0.782	0.905	1.171	0.788	1.302	1.024	0.996	0.9634
A0A452DRE7	Lymphocyte antigen 6 complex, locus E(predicted) OS=Capra hircus OX=9925 GN=LY6E PE=4 SV=1	LY6E	13.656	8.5	1	1	1
A0A452DRG4	Mesothelin(predicted) OS=Capra hircus OX=9925 GN=MSLN PE=4 SV=1	MSLN	44.4	19.6	7	8	7	1.715	1.235	0.94	1.686	1.452	0.459	0.563	0.886	0.622	0.873	0.484	0.0025214
A0A452DRH7	Chromosome 9 C6orf203 homolog(predicted) OS=Capra hircus OX=9925 GN=C6orf203 PE=4 SV=1	C6orf203	27.687	6.7	2	2	2	1.315	1.805	0.772	1.102	1.67	0.98	0.752	0.626	0.741	0.65	0.563	0.0133397
A0A452DRI6	IST1-like protein (Fragment)(predicted) OS=Capra hircus OX=9925 GN=IST1 PE=4 SV=1	IST1	39.758	12.4	4	5	4	0.742	0.967	0.821	0.834	0.956	1.481	1.209	1.186	1.079	1.096	1.401	0.0021562
A0A452DRI9	Sushi domain containing 1(predicted) OS=Capra hircus OX=9925 GN=SUSD1 PE=4 SV=1	SUSD1	80.585	5	4	4	4	0.894	1.436	1.585	0.939	1.462	0.674	0.769	1.039	1.258	0.685	0.701	0.071318
A0A452DRK4	Secretory carrier-associated membrane protein(predicted) OS=Capra hircus OX=9925 GN=SCAMP3 PE=4 SV=1	SCAMP3	38.324	22.8	7	7	7	0.783	0.858	0.919	0.774	0.817	0.987	1.123	1.129	1.213	1.495	1.433	0.00157834
A0A452DRK5	Hemopexin(predicted) OS=Capra hircus OX=9925 GN=HPX PE=4 SV=1	HPX	51.945	47.5	21	40	21	0.888	1.223	1.739	0.888	1.174	0.816	0.884	1.151	0.875	0.69	0.747	0.104043
A0A452DRL0	Stanniocalcin 2(predicted) OS=Capra hircus OX=9925 GN=STC2 PE=4 SV=1	STC2	33.211	18.5	5	9	5	0.645	1.117	1.101	0.987	1.007	0.725	0.861	1.805	1.075	1.13	1.152	0.56556
A0A452DRL4	Interferon-gamma-inducible lysosomal thiol reductase(predicted) OS=Capra hircus OX=9925 GN=IFI30 PE=4 SV=1	IFI30	27.685	29.9	4	12	4	1.14	0.918	0.802	1.011	1.001	1.527	1.129	0.872	0.997	1.052	1.145	0.29308
A0A452DRL6	protein transport protein Sec31A isoform X6(predicted) OS=Capra hircus OX=9925 GN=SEC31A PE=4 SV=1	SEC31A	121.62	1.9	2	2	2	0.876	0.846	1.267	1.112	0.916	1.328	0.929	1.204	0.89	1.124	1.091	0.441
A0A452DRQ8	ERO1-like protein alpha(predicted) OS=Capra hircus OX=9925 GN=ERO1A PE=4 SV=1	ERO1A	52.257	14.3	4	4	3	1.124	0.838	1.3	1.394	0.815	0.729	0.841	1.324	1.153	0.982	0.919	0.60412
A0A452DRS8	Transmembrane protein ENSP00000340100-like protein(predicted) OS=Capra hircus OX=9925 GN=FAM205C PE=4 SV=1	FAM205C	43.821	9.8	4	4	4	1.706	1.973	0.921	1.427	1.887	0.308	0.454	0.565	0.648	0.528	0.316	0.0002957
A0A452DRV9	Prosaposin(predicted) OS=Capra hircus OX=9925 GN=PSAP PE=4 SV=1	PSAP	57.424	28.3	14	42	14	0.867	1.004	1.039	0.828	0.772	1.1	1.11	1.116	1.258	1.116	1.264	0.0048207
A0A452DRW1	F-actin-capping protein subunit alpha(predicted) OS=Capra hircus OX=9925 GN=CAPZA3 PE=4 SV=1	CAPZA3	35.066	15.7	6	8	6	1.114	0.794	4.363	1.106	1.003	0.375	0.503	0.52	0.434	0.488	0.277	0.025744
A0A452DRX9	Sperm acrosome membrane-associated protein 1(predicted) OS=Capra hircus OX=9925 GN=SPACA1 PE=4 SV=1	SPACA1	30.924	43.2	9	26	9	1.835	1.59	1.125	1.615	1.357	0.435	0.469	0.461	0.571	0.616	0.339	4.2833e-06
A0A452DRY0	Beta-defensin(predicted) OS=Capra hircus OX=9925 PE=4 SV=1	---	11.242	31.4	6	13	6	0.601	0.817	0.555	0.628	0.897	2.023	1.067	1.106	1.276	1.11	1.882	0.0034785
A0A452DRZ8	Aldo-keto reductase family 1 member A1(predicted) OS=Capra hircus OX=9925 GN=AKR1A1 PE=4 SV=1	AKR1A1	36.56	17.2	6	7	6	0.849	1.144	0.964	0.866	1.257	1.104	0.982	0.876	1.227	0.968	1.015	0.83904
A0A452DS15	HHIP like 1(predicted) OS=Capra hircus OX=9925 GN=HHIPL1 PE=4 SV=1	HHIPL1	87.036	16.3	12	14	12	0.932	0.864	1.12	0.894	0.864	0.741	0.983	1.36	1.434	1.091	1.2	0.24886
A0A452DS18	TKTL1(predicted) OS=Capra hircus OX=9925 GN=TKTL1 PE=4 SV=1	TKTL1	64.838	17.3	8	11	8	1.316	0.562	0.605	1.487	0.628	2.704	0.724	0.934	0.78	0.588	1.246	0.69306
A0A452DS19	Prostaglandin-H2 D-isomerase(predicted) OS=Capra hircus OX=9925 GN=LOC106502686 PE=4 SV=1	LOC106502686	21.108	35.6	9	26	9	2.07	0.792	0.715	2.011	0.786	0.767	0.718	0.687	0.754	0.781	0.582	0.155705
A0A452DS23	N(4)-(Beta-N-acetylglucosaminyl)-L-asparaginase (Fragment)(predicted) OS=Capra hircus OX=9925 GN=AGA PE=4 SV=1	AGA	37.077	39.3	11	32	11	1.242	1.218	1.178	1.143	1.427	0.783	0.757	0.745	0.728	0.805	0.615	1.5287e-06
A0A452DS27	Protein rogdi homolog(predicted) OS=Capra hircus OX=9925 GN=ROGDI PE=4 SV=1	ROGDI	32.276	10.5	2	3	2	0.724	0.947	0.825	0.627	0.636	0.791	1.826	1.22	1.441	0.996	1.669	0.0188
A0A452DS37	Alpha-L-fucosidase(predicted) OS=Capra hircus OX=9925 GN=FUCA1 PE=4 SV=1	FUCA1	53.855	36.3	15	25	15	0.886	0.854	0.718	0.838	0.904	1.269	1.641	1.031	1.081	0.943	1.42	0.01328
A0A452DS44	Disintegrin and metalloproteinase domain-containing protein 15(predicted) OS=Capra hircus OX=9925 GN=ADAM15 PE=4 SV=1	ADAM15	92.826	3.8	3	3	3	0.847	0.924	1.193	0.991	0.829	1.047	1.171	1.242	1.137	1.007	1.171	0.062136
A0A452DS73	Armadillo repeat-containing protein 4(predicted) OS=Capra hircus OX=9925 GN=ARMC4 PE=4 SV=1	ARMC4	116.07	4.4	5	5	5	1.211	1.19	1.033	1.034	1.095	0.725	0.996	1.152	0.912	1.11	0.88	0.159055
A0A452DS87	Uncharacterized protein OS=Capra hircus OX=9925 PE=4 SV=1	---	10.442	13.5	1	1	1	1.41	1.359	1.009	1.431	1.419	0.906	0.667	0.816	0.906	0.53	0.577	0.00182103
A0A452DS93	STE20-related kinase adapter protein alpha(predicted) OS=Capra hircus OX=9925 GN=STRADA PE=4 SV=1	STRADA	43.371	7.4	3	3	3	0.938	0.898	0.875	1.094	0.844	1.069	1.216	0.998	1.058	1.156	1.182	0.0178642
A0A452DSB1	Annexin (Fragment)(predicted) OS=Capra hircus OX=9925 GN=ANXA2 PE=4 SV=1	ANXA2	38.612	31	9	11	9	0.892	1.244	1.51	0.909	1.315	0.839	0.722	0.914	0.939	1.069	0.764	0.070616
A0A452DSD6	FGD1 protein(predicted) OS=Capra hircus OX=9925 GN=FGD1 PE=4 SV=1	FGD1	104.83	1	1	2	1	0.759	1.463	2.103	0.764	1.108	0.759	0.879	1.278	0.859	0.607	0.707	0.23048
A0A452DSE5	BBS12 protein(predicted) OS=Capra hircus OX=9925 GN=BBS12 PE=4 SV=1	BBS12	77.531	1.3	1	1	1	1.062	0.956	1.281	0.852	0.847	1.146	1.151	1.317	1.14	0.763	1.104	0.45164
A0A452DSH1	Coiled-coil domain-containing protein 40 (Fragment)(predicted) OS=Capra hircus OX=9925 GN=CCDC40 PE=4 SV=1	CCDC40	108.87	0.9	1	1	1
A0A452DSJ0	Transcobalamin-2(predicted) OS=Capra hircus OX=9925 GN=TCN2 PE=4 SV=1	TCN2	47.653	41.4	16	64	16	0.859	1.008	1.363	0.824	0.877	0.919	0.886	1.224	1.343	1.022	1.094	0.46198
A0A452DSM0	TIP41-like protein isoform X1(predicted) OS=Capra hircus OX=9925 PE=4 SV=1	---	31.174	7	2	2	2	0.699	0.83	0.679	0.701	0.562	1.951	1.565	1.204	1.2	1.062	2.012	0.00064289
A0A452DSN2	Choline transporter-like protein 2(predicted) OS=Capra hircus OX=9925 GN=SLC44A2 PE=4 SV=1	SLC44A2	78.562	3.7	3	3	3	1.011	1.127	0.764	0.912	1.22	1.115	0.951	0.944	1.333	1.029	1.067	0.52052
A0A452DSP1	Ubiquitin carboxyl-terminal hydrolase 14(predicted) OS=Capra hircus OX=9925 GN=USP14 PE=4 SV=1	USP14	55.98	8.9	4	4	4	0.776	0.85	0.593	0.78	0.81	1.561	1.613	0.965	1.169	1.161	1.698	0.0020961
A0A452DSP4	Spermatid-associated protein(predicted) OS=Capra hircus OX=9925 GN=SPERT PE=4 SV=1	SPERT	48.371	24.7	12	17	12	1.496	0.763	0.816	1.706	0.823	1.479	0.671	1.012	0.748	0.7	0.823	0.4446
A0A452DSR1	Inositol polyphosphate 1-phosphatase(predicted) OS=Capra hircus OX=9925 GN=INPP1 PE=4 SV=1	INPP1	42.79	12.3	4	6	4	0.774	0.883	0.7	0.781	0.768	1.64	1.449	0.923	1.213	1.371	1.689	0.00123956
A0A452DSS6	Ribonuclease A family member 13 (inactive) OS=Capra hircus OX=9925 GN=RNASE13 PE=4 SV=1	RNASE13	17.831	5.2	1	2	1	1.19	1.024	0.993	1.057	1.247	1.113	1.263	0.94	0.802	0.811	0.894	0.2479
A0A452DSU1	Programmed cell death protein 5(predicted) OS=Capra hircus OX=9925 GN=PDCD5 PE=4 SV=1	PDCD5	14.226	34.4	4	7	4	0.827	0.905	0.61	0.978	0.837	2.096	1.142	0.873	1.04	1.217	1.532	0.048025
A0A452DT04	tumor necrosis factor alpha-induced protein 2(predicted) OS=Capra hircus OX=9925 GN=TNFAIP2 PE=4 SV=1	TNFAIP2	73.597	3.7	3	3	3	0.743	0.781	0.657	0.75	0.748	0.799	1.44	0.901	1.432	1.63	1.686	0.028915
A0A452DT26	26S proteasome non-ATPase regulatory subunit 13(predicted) OS=Capra hircus OX=9925 GN=PSMD13 PE=4 SV=1	PSMD13	42.761	42.6	17	24	17	0.963	0.821	0.734	0.885	0.839	1.361	1.395	1.003	1.173	1.243	1.456	0.00102027
A0A452DT41	UDP-glucose:glycoprotein glucosyltransferase 2 (Fragment)(predicted) OS=Capra hircus OX=9925 GN=UGGT2 PE=4 SV=1	UGGT2	168.93	1.2	2	2	2
A0A452DT47	Myosin light polypeptide 6(predicted) OS=Capra hircus OX=9925 GN=MYL6B PE=4 SV=1	MYL6B	17.949	15	2	2	2	0.911	1.104	1.411	0.935	1.148	0.984	1.021	0.911	0.978	1.043	0.896	0.3006
A0A452DT65	GTP-binding nuclear protein Ran(predicted) OS=Capra hircus OX=9925 GN=LOC108637516 PE=4 SV=1	LOC108637516	24.437	19	4	5	4	0.958	1.094	0.996	1.116	1.06	1.038	1.026	0.983	1.066	0.966	0.972	0.44598
A0A452DTB9	Synaptophysin like 1(predicted) OS=Capra hircus OX=9925 GN=SYPL1 PE=4 SV=1	SYPL1	28.389	12.5	3	7	3	1.172	0.787	1.5	1.092	0.759	0.85	1.045	0.916	1.07	1.068	0.932	0.76596
A0A452DTD6	platelet-derived growth factor D isoform X2(predicted) OS=Capra hircus OX=9925 GN=PDGFD PE=4 SV=1	PDGFD	42.79	17.3	6	8	6	0.516	1.759	0.669	0.49	1.337	1.043	0.942	2.352	0.969	0.601	1.238	0.49464
A0A452DTF4	brain acid soluble protein 1(predicted) OS=Capra hircus OX=9925 GN=BASP1 PE=4 SV=1	BASP1	23.14	68	13	31	13	0.808	1.109	0.742	0.897	1.293	1.482	0.821	0.801	1.18	1.11	1.112	0.533
A0A452DTH2	Talin-1 (Fragment)(predicted) OS=Capra hircus OX=9925 GN=TLN1 PE=4 SV=1	TLN1	267.22	0.8	2	2	2	1.49	1.207	0.917	1.795	1.273	1.267	0.697	0.498	0.733	0.538	0.559	0.0146961
A0A452DTH7	Complement factor I(predicted) OS=Capra hircus OX=9925 GN=CFI PE=4 SV=1	CFI	68.558	45	23	30	23	1.35	1.28	1.542	1.464	1.5	0.706	0.578	0.644	0.633	0.38	0.412	0.00135939
A0A452DTI8	V-type proton ATPase subunit S1(predicted) OS=Capra hircus OX=9925 GN=ATP6AP1 PE=4 SV=1	ATP6AP1	51.821	17.9	6	9	6	0.812	0.992	0.956	0.915	0.903	1.49	1.238	1.332	1.207	0.681	1.299	0.175075
A0A452DTJ9	von Willebrand factor A domain containing 1 OS=Capra hircus OX=9925 GN=VWA1 PE=4 SV=1	VWA1	42.901	4.4	1	1	1	1.06	1.171	1.075	0.945	1.296	0.985	0.842	1.084	0.945	1.055	0.885	0.120681
A0A452DTK8	agrin isoform X8(predicted) OS=Capra hircus OX=9925 GN=AGRN PE=4 SV=1	AGRN	200.3	1.5	3	3	3	1.294	1.116	1.103	1.337	1.149	0.821	0.747	1.049	1.009	0.841	0.745	0.0041602
A0A452DTL0	2-oxoglutarate dehydrogenase, mitochondrial(predicted) OS=Capra hircus OX=9925 GN=OGDH PE=4 SV=1	OGDH	115.51	25.3	25	30	25	1.573	0.962	1.191	1.497	1.018	0.597	0.917	0.682	0.627	1.111	0.63	0.0161818
A0A452DTM0	general transcription factor 3C polypeptide 4(predicted) OS=Capra hircus OX=9925 GN=GTF3C4 PE=4 SV=1	GTF3C4	91.339	0.9	1	1	1	2.081	2.118	0.79	1.714	2.241	0.255	0.21	0.173	0.443	0.346	0.16	0.000100279
A0A452DTT2	AP-1 complex subunit gamma(predicted) OS=Capra hircus OX=9925 GN=AP1G1 PE=4 SV=1	AP1G1	91.396	20.8	16	24	15	1.053	0.895	0.87	1.063	0.819	1.012	1.39	1.24	0.906	1.011	1.183	0.124216
A0A452DTV3	Deaminated glutathione amidase(predicted) OS=Capra hircus OX=9925 GN=NIT1 PE=4 SV=1	NIT1	36.156	30.6	8	12	8	1.08	1.07	0.932	1.061	1.092	1.134	1.118	0.781	0.946	1.135	0.977	0.69548
A0A452DTX4	Beta-glucuronidase(predicted) OS=Capra hircus OX=9925 PE=4 SV=1	---	62.719	23.7	12	19	1	1.455	0.877	1.083	1.382	0.995	1.691	0.521	0.655	1.024	0.754	0.802	0.23408
A0A452DTY2	ADP/ATP translocase 2(predicted) OS=Capra hircus OX=9925 GN=SLC25A5 PE=4 SV=1	SLC25A5	32.955	11.7	3	4	2
A0A452DU41	Protein phosphatase inhibitor 2(predicted) OS=Capra hircus OX=9925 GN=PPP1R2 PE=4 SV=1	PPP1R2	22.995	33.3	5	5	5	0.722	0.796	0.886	0.771	0.615	1.974	1.559	0.835	0.996	1.09	1.703	0.0192995
A0A452DU42	Histone H2A deubiquitinase MYSM1(predicted) OS=Capra hircus OX=9925 GN=MYSM1 PE=4 SV=1	MYSM1	94.076	1.3	1	1	1	1.162	1.185	2.551	0.916	1.168	0.629	0.743	0.896	0.829	0.47	0.511	0.0169799
A0A452DU53	2',3'-cyclic-nucleotide 3'-phosphodiesterase(predicted) OS=Capra hircus OX=9925 GN=CNP PE=4 SV=1	CNP	47.4	23.1	9	11	9	1.007	1.084	1.004	0.931	1.253	1.182	0.948	0.881	1.112	1.069	0.984	0.82144
A0A452DU54	Transmembrane protein 205(predicted) OS=Capra hircus OX=9925 GN=TMEM205 PE=4 SV=1	TMEM205	20.945	9	1	2	1	1.089	0.964	0.957	1.689	1.221	1	0.874	0.902	0.798	0.94	0.763	0.054145
A0A452DUA0	Profilin(predicted) OS=Capra hircus OX=9925 GN=PFN3 PE=4 SV=1	PFN3	14.613	37.2	4	7	4	1.431	1.022	1.099	1.059	1.231	1.568	0.855	0.613	0.774	0.772	0.784	0.124717
A0A452DUE0	ran-binding protein 17 isoform X2(predicted) OS=Capra hircus OX=9925 PE=4 SV=1	---	65.427	16.1	7	7	7	0.906	0.992	0.902	0.914	1.034	1.012	1.195	0.965	1.15	1.089	1.14	0.028117
A0A452DUE2	Axonemal dynein light intermediate polypeptide 1 (Fragment)(predicted) OS=Capra hircus OX=9925 GN=DNALI1 PE=4 SV=1	DNALI1	29.672	43.8	14	20	14	1.672	1.141	1.075	1.558	1.241	0.734	0.706	0.802	0.771	0.715	0.557	0.0031776
A0A452DUF0	Pro-neuropeptide Y(predicted) OS=Capra hircus OX=9925 GN=NPY PE=4 SV=1	NPY	10.75	21.6	2	3	2	0.888	1.109	1.014	0.875	0.964	0.727	1.162	1.712	1.156	0.933	1.173	0.45172
A0A452DUF3	cochlin(predicted) OS=Capra hircus OX=9925 GN=COCH PE=4 SV=1	COCH	59.674	10.6	6	7	6	0.669	0.944	0.984	0.722	0.798	0.642	0.776	0.902	0.973	2.685	1.452	0.41294
A0A452DUG3	Synaptosomal-associated protein(predicted) OS=Capra hircus OX=9925 GN=LOC108636029 PE=4 SV=1	LOC108636029	23.226	43.6	7	8	7	1.146	0.926	0.97	1.202	1.144	1.154	0.969	0.751	1.078	0.979	0.915	0.3256
A0A452DUH2	Disintegrin and metalloproteinase domain-containing protein 10(predicted) OS=Capra hircus OX=9925 GN=ADAM10 PE=4 SV=1	ADAM10	84.206	11.4	6	6	6	0.782	1.103	1.44	0.782	1.121	0.826	0.958	1.269	1.38	0.979	1.035	0.7782
A0A452DUM2	Plastin-1(predicted) OS=Capra hircus OX=9925 GN=PLS1 PE=4 SV=1	PLS1	70.556	11	7	7	5	0.584	0.734	0.584	0.596	0.938	2.245	1.238	1.262	1.017	1.261	2.044	0.0027218
A0A452DUN3	ATPase inhibitor, mitochondrial(predicted) OS=Capra hircus OX=9925 GN=ATP5IF1 PE=4 SV=1	ATP5IF1	12.302	26.6	6	16	6	0.987	1.791	0.68	0.778	1.464	1.069	0.744	0.526	0.97	1.002	0.756	0.3138
A0A452DUR7	Acylamino-acid-releasing enzyme(predicted) OS=Capra hircus OX=9925 GN=APEH PE=4 SV=1	APEH	80.99	23.8	14	21	14	0.988	1.06	0.877	0.976	1.055	1.161	1.151	0.84	0.955	1.092	1.049	0.5648
A0A452DUS0	Cytoplasmic aconitate hydratase(predicted) OS=Capra hircus OX=9925 GN=ACO1 PE=4 SV=1	ACO1	98.128	11.5	9	11	9	0.927	0.893	0.846	1.053	1.029	1.43	1.062	1.048	1.032	1.106	1.196	0.045139
A0A452DUT6	Alpha-(1,6)-fucosyltransferase(predicted) OS=Capra hircus OX=9925 GN=FUT8 PE=4 SV=1	FUT8	66.485	6.4	3	3	3	0.804	1.163	1.22	1.033	1.05	0.706	0.883	1.494	1.25	0.919	0.997	0.85244
A0A452DUU0	40S ribosomal protein S4(predicted) OS=Capra hircus OX=9925 GN=LOC102173821 PE=4 SV=1	LOC102173821	28.319	3.6	1	1	1	1.858	0.842	0.794	2.603	0.835	0.653	0.717	0.756	0.798	0.571	0.504	0.090421
A0A452DUV6	sperm mitochondrial-associated cysteine-rich protein(predicted) OS=Capra hircus OX=9925 GN=SMCP PE=4 SV=1	SMCP	10.967	38.8	4	5	4	2.086	0.76	0.75	2.551	0.83	1.064	0.586	0.556	0.572	0.529	0.474	0.065403
A0A452DUZ4	LY6G6C(predicted) OS=Capra hircus OX=9925 GN=LY6G6C PE=4 SV=1	LY6G6C	13.638	12.8	1	1	1
A0A452DV15	Acyl-CoA synthetase long-chain family member 6(predicted) OS=Capra hircus OX=9925 GN=ACSL6 PE=4 SV=1	ACSL6	76.471	9.3	6	6	6	1.685	0.811	0.961	1.371	1.183	1.077	0.778	0.757	0.88	0.821	0.718	0.064337
A0A452DV34	FUN14 domain containing 2(predicted) OS=Capra hircus OX=9925 PE=4 SV=1	---	19.878	24.7	6	9	2	1.319	1.03	0.937	1.171	1.286	1.079	0.904	0.652	0.839	1.043	0.787	0.057083
A0A452DV68	Sulfotransferase(predicted) OS=Capra hircus OX=9925 GN=CHST4 PE=4 SV=1	CHST4	45.932	4.1	2	2	2	0.798	1.044	1.487	0.917	0.805	0.874	0.86	1.3	1.483	0.935	1.079	0.63706
A0A452DVG8	PDIA6 protein (Fragment)(predicted) OS=Capra hircus OX=9925 GN=PDIA6 PE=4 SV=1	PDIA6	48.141	20.9	7	12	7	1.19	0.888	0.864	1.253	0.932	1.267	1.1	1.185	0.964	0.842	1.045	0.67958
A0A452DVJ9	Interleukin 6 signal transducer(predicted) OS=Capra hircus OX=9925 GN=IL6ST PE=4 SV=1	IL6ST	103.88	4.7	5	5	5	0.863	1.277	1.159	1.002	1.272	0.807	1.036	1.12	0.918	0.918	0.861	0.162397
A0A452DVL5	60S ribosomal protein L37a(predicted) OS=Capra hircus OX=9925 GN=LOC108636730 PE=4 SV=1	LOC108636730	10.275	19.6	1	1	1	0.597	0.986	1.314	1.272	1.136	0.891	0.92	1.216	1.068	1.079	0.975	0.97262
A0A452DVL8	Epididymis secretory protein Li 85(predicted) OS=Capra hircus OX=9925 GN=PCBP1 PE=4 SV=1	PCBP1	37.497	11.2	3	3	3	1.09	1.127	1.263	1.049	1.303	1.062	0.905	0.998	0.781	0.894	0.796	0.0090365
A0A452DVP7	Lymphocyte cytosolic protein 1(predicted) OS=Capra hircus OX=9925 GN=LCP1 PE=4 SV=1	LCP1	70.178	59.3	31	59	24	0.828	1.035	0.836	0.907	1.258	1.494	0.888	0.927	1.001	1.127	1.118	0.41046
A0A452DVV1	Cytosol aminopeptidase(predicted) OS=Capra hircus OX=9925 GN=LAP3 PE=4 SV=1	LAP3	56.196	66.7	32	73	32	1.272	0.984	0.974	1.087	1.025	1.234	1.068	0.71	0.8	1.189	0.936	0.50292
A0A452DVV6	ras-related protein Rab-10(predicted) OS=Capra hircus OX=9925 GN=RAB10 PE=4 SV=1	RAB10	21.485	25	5	5	4	0.897	1.078	1.183	0.901	1.021	0.963	1.022	1.249	1.112	0.947	1.042	0.58964
A0A452DVX4	Ephrin-B1(predicted) OS=Capra hircus OX=9925 GN=EFNB1 PE=4 SV=1	EFNB1	38.01	3.2	1	1	1	0.816	1.279	0.965	0.899	1.12	1.201	1.148	1.149	0.919	0.973	1.061	0.50424
A0A452DVX5	Hyaluronidase-2(predicted) OS=Capra hircus OX=9925 GN=HYAL2 PE=4 SV=1	HYAL2	54.218	10.5	5	7	5	0.773	1.3	1.507	0.809	1.016	0.634	0.989	1.415	1.172	0.791	0.925	0.67794
A0A452DVX9	WD repeat and FYVE domain-containing protein 1 (Fragment)(predicted) OS=Capra hircus OX=9925 GN=WDFY1 PE=4 SV=1	WDFY1	34.322	6.6	2	2	2	1.011	0.853	1.01	0.966	0.879	1.285	1.162	1.241	1.085	0.985	1.22	0.0106395
A0A452DVZ8	Cullin-3 isoform 2(predicted) OS=Capra hircus OX=9925 GN=CUL3 PE=4 SV=1	CUL3	88.958	54.2	42	115	42	0.928	0.94	0.754	0.978	0.855	1.405	1.313	0.991	1.02	1.144	1.318	0.0111045
A0A452DW17	Serine/threonine-protein phosphatase 2A catalytic subunit beta isoform(predicted) OS=Capra hircus OX=9925 GN=PPP2CB PE=4 SV=1	PPP2CB	35.561	39.5	12	19	2	0.917	0.827	0.695	0.918	1.055	1.612	1.147	0.852	0.975	1.385	1.353	0.066316
A0A452DW23	vitelline membrane outer layer protein 1 homolog(predicted) OS=Capra hircus OX=9925 GN=VMO1 PE=4 SV=1	VMO1	21.343	40.9	5	8	5	0.943	2.443	1.022	1.095	1.566	0.637	0.51	0.929	0.625	0.684	0.479	0.009075
A0A452DW40	inorganic pyrophosphatase 2, mitochondrial isoform X1(predicted) OS=Capra hircus OX=9925 GN=PPA2 PE=4 SV=1	PPA2	38.721	34.8	12	22	12	1.04	0.862	0.756	0.867	0.872	1.146	1.381	1.026	1.047	1.28	1.337	0.005384
A0A452DW73	Aconitate hydratase, mitochondrial(predicted) OS=Capra hircus OX=9925 GN=ACO2 PE=4 SV=1	ACO2	85.4	46.3	31	74	31	1.079	1.316	0.771	0.973	1.282	1.114	0.896	0.772	0.922	1.092	0.885	0.37038
A0A452DW79	Radial spoke head 14 homolog OS=Capra hircus OX=9925 GN=RSPH14 PE=4 SV=1	RSPH14	41.112	5.3	2	2	2	1.138	1.099	1.14	1.3	1.447	0.851	0.768	1.171	0.696	0.879	0.713	0.0089353
A0A452DW85	60S ribosomal protein L7 (Fragment)(predicted) OS=Capra hircus OX=9925 GN=RPL7 PE=4 SV=1	RPL7	29.368	12.8	3	3	3	1.502	0.899	0.881	1.732	0.772	0.839	0.777	1.002	1.025	1.008	0.804	0.34452
A0A452DW90	60S ribosomal protein L22-like(predicted) OS=Capra hircus OX=9925 PE=4 SV=1	---	13.378	10.1	1	1	1	0.783	0.934	0.766	0.853	1.148	1.422	1.38	1.113	1.015	1.024	1.328	0.025039
A0A452DW92	Proteasome 26S subunit, non-ATPase 11(predicted) OS=Capra hircus OX=9925 GN=PSMD11 PE=4 SV=1	PSMD11	46.114	33.4	13	20	13	0.826	0.804	0.628	0.846	0.717	1.613	1.471	0.922	1.176	1.281	1.691	0.00174268
A0A452DWA3	ubiquitin domain-containing protein 2 isoform X1(predicted) OS=Capra hircus OX=9925 GN=UBTD2 PE=4 SV=1	UBTD2	26.145	23.1	4	4	4	0.867	0.835	0.939	0.946	0.853	1.212	1.112	1.271	1.092	1.359	1.362	0.00021969
A0A452DWC1	Cilia and flagella associated protein 52(predicted) OS=Capra hircus OX=9925 GN=CFAP52 PE=4 SV=1	CFAP52	68.691	17.3	10	12	10	1.541	1.233	1.17	1.554	1.15	0.61	0.646	0.815	0.783	0.617	0.522	9.8504e-05
A0A452DWD6	Zona pellucida binding protein(predicted) OS=Capra hircus OX=9925 GN=ZPBP PE=4 SV=1	ZPBP	39.559	39.7	15	48	15	1.84	1.568	1.026	1.426	1.408	0.492	0.496	0.556	0.651	0.576	0.381	2.1295e-05
A0A452DWD8	Pyruvate dehydrogenase E1 component subunit alpha(predicted) OS=Capra hircus OX=9925 GN=PDHA2 PE=4 SV=1	PDHA2	43.327	26.3	9	12	9	1.039	0.987	0.878	0.771	0.854	0.963	1.193	0.904	0.963	1.847	1.296	0.147422
A0A452DWG0	Phosphoribosyl pyrophosphate synthetase 1-like 1 OS=Capra hircus OX=9925 GN=PRPS1L1 PE=4 SV=1	PRPS1L1	33.132	23.5	6	9	1
A0A452DWG5	Synaptogyrin-2(predicted) OS=Capra hircus OX=9925 GN=SYNGR2 PE=4 SV=1	SYNGR2	24.987	5.4	1	1	1
A0A452DWN7	NEDD8 (Fragment)(predicted) OS=Capra hircus OX=9925 GN=NEDD8 PE=4 SV=1	NEDD8	8.6338	50.6	4	8	4	0.8	0.773	0.511	0.856	0.738	1.477	1.348	0.888	0.908	1.213	1.586	0.0105837
A0A452DWR2	Beta-hexosaminidase(predicted) OS=Capra hircus OX=9925 GN=LOC102181993 PE=4 SV=1	LOC102181993	63.155	38.8	21	85	2	0.884	0.821	0.709	0.808	0.935	1.871	1.389	1.154	1.079	0.831	1.521	0.026882
A0A452DWR4	Alpha-aminoadipic semialdehyde dehydrogenase(predicted) OS=Capra hircus OX=9925 GN=ALDH7A1 PE=4 SV=1	ALDH7A1	57.388	8.7	4	5	4	0.887	1.054	0.857	0.812	0.967	1.148	1.08	1.01	1.055	1.389	1.241	0.0181756
A0A452DWS2	Tissue specific transplantation antigen P35B(predicted) OS=Capra hircus OX=9925 GN=TSTA3 PE=4 SV=1	TSTA3	34.447	6.2	2	3	2	1.442	0.777	0.812	1.389	0.766	1.212	1.314	0.771	0.718	1.102	0.987	0.99702
A0A452DWU1	Histone H4(predicted) OS=Capra hircus OX=9925 GN=LOC102180307 PE=4 SV=1	LOC102180307	11.367	40.8	4	6	4	1.256	1.308	1.643	1.342	1.054	0.687	0.567	1.033	0.912	0.763	0.6	0.0033625
A0A452DWV7	Glutathione peroxidase(predicted) OS=Capra hircus OX=9925 GN=LOC102168954 PE=4 SV=1	LOC102168954	25.076	59.8	14	73	13	1.798	0.623	0.598	1.845	0.667	1.117	0.888	0.726	0.952	0.985	0.844	0.88994
A0A452DWY5	Beta-hexosaminidase(predicted) OS=Capra hircus OX=9925 GN=LOC102181993 PE=4 SV=1	LOC102181993	56.697	39.8	19	79	0
A0A452DWZ4	V-type proton ATPase subunit F(predicted) OS=Capra hircus OX=9925 GN=ATP6V1F PE=4 SV=1	ATP6V1F	13.398	32.8	6	10	6	0.772	0.982	0.854	0.809	0.899	1.371	1.38	1.013	1.128	1.091	1.386	0.0026812
A0A452DX07	protein MON2 homolog isoform X2(predicted) OS=Capra hircus OX=9925 GN=MON2 PE=4 SV=1	MON2	189.7	10.8	17	18	17	0.809	0.834	0.844	0.852	0.854	1.319	1.407	1.166	1.078	1.141	1.457	0.00175696
A0A452DX30	C1GALT1-specific chaperone 1(predicted) OS=Capra hircus OX=9925 GN=C1GALT1C1 PE=4 SV=1	C1GALT1C1	36.412	36.8	13	24	13	0.963	1.128	1.141	0.973	0.894	0.79	0.908	1.558	1.185	0.891	1.046	0.89386
A0A452DX82	Double-headed protease inhibitor, submandibular gland(predicted) OS=Capra hircus OX=9925 PE=4 SV=1	---	11.481	43.6	9	43	9	1.565	0.844	0.946	1.454	1.051	0.948	1.158	0.629	0.91	0.598	0.724	0.100219
A0A452DXA3	Small membrane A-kinase anchor protein(predicted) OS=Capra hircus OX=9925 GN=C2orf88 PE=4 SV=1	C2orf88	10.969	27.4	3	3	3	0.772	0.757	0.692	0.68	0.693	0.991	1.65	1.11	1.138	1.876	1.882	0.0089372
A0A452DXB7	Beta-defensin(predicted) OS=Capra hircus OX=9925 GN=DEFB112 PE=4 SV=1	DEFB112	13.856	35.5	6	16	6	1.03	0.864	0.979	1.102	0.923	1.026	1.155	1.103	1.012	0.965	1.074	0.20568
A0A452DXE2	Complement component 3(predicted) OS=Capra hircus OX=9925 GN=C3 PE=4 SV=1	C3	187.2	43.2	81	64	32	1.183	1.013	2.12	1.566	1.112	0.486	0.665	0.79	0.657	0.548	0.45	0.00122442
A0A452DXH7	Pyridoxal kinase(predicted) OS=Capra hircus OX=9925 GN=PDXK PE=4 SV=1	PDXK	34.741	9.3	2	2	2	0.685	1.224	0.882	0.632	1.096	1.161	1.301	1.065	1.227	1.148	1.306	0.088395
A0A452DXI9	Bleomycin hydrolase (Fragment)(predicted) OS=Capra hircus OX=9925 GN=BLMH PE=4 SV=1	BLMH	52.732	22.6	13	26	13	1.013	1.027	0.811	0.983	1.006	1.185	1.207	0.849	1.072	1.066	1.111	0.2201
A0A452DXK3	Sulfotransferase(predicted) OS=Capra hircus OX=9925 GN=CHST1 PE=4 SV=1	CHST1	46.646	28.5	9	15	9	0.953	1.22	1.249	0.922	0.996	0.737	0.862	1.418	1.248	0.856	0.959	0.65342
A0A452DXL0	Cytochrome b5 domain containing 2(predicted) OS=Capra hircus OX=9925 GN=CYB5D2 PE=4 SV=1	CYB5D2	29.32	6	1	1	1	1.855	1.184	0.789	0.912	1.128	0.633				0.752	0.59	0.106337
A0A452DXL2	NPL4 homolog, ubiquitin recognition factor(predicted) OS=Capra hircus OX=9925 GN=NPLOC4 PE=4 SV=1	NPLOC4	68.03	6.7	4	4	4	0.844	0.914	1.652	1.03	0.985	0.837	1.025	1.087	0.857	1.242	0.931	0.71372
A0A452DXP3	Cathepsin L(predicted) OS=Capra hircus OX=9925 GN=CTSV PE=4 SV=1	CTSV	37.253	31.7	10	16	10	0.91	1.514	1.002	0.877	1.165	0.703	0.793	1.358	1.101	1.008	0.908	0.51934
A0A452DXS5	ADP-ribosylation factor 6(predicted) OS=Capra hircus OX=9925 GN=ARF6 PE=4 SV=1	ARF6	20.082	38.3	4	5	4	0.896	0.989	1.049	0.789	0.881	1.067	1.318	0.99	1.205	1.177	1.25	0.0127207
A0A452DXT0	Equatorin(predicted) OS=Capra hircus OX=9925 GN=EQTN PE=4 SV=1	EQTN	36.213	11.2	3	6	3	1.685	1.297	1.234	1.468	1.319	0.746	0.582	0.445	0.523	0.683	0.425	4.1253e-05
A0A452DXU5	Probable phospholipid-transporting ATPase IA(predicted) OS=Capra hircus OX=9925 GN=ATP8A1 PE=4 SV=1	ATP8A1	127.54	0.9	1	1	1	1.023	0.852	1.119	0.927	0.826	1.031	0.978	1.15	1.404	1.138	1.201	0.062239
A0A452DY02	Beta-2-microglobulin(predicted) OS=Capra hircus OX=9925 PE=4 SV=1	---	13.613	44.1	6	27	1	0.562	1.123	0.584	0.553	1.042	0.696	1.545	1.253	1.398	1.622	1.686	0.042215
A0A452DY16	Epididymal sperm-binding protein 1(predicted) OS=Capra hircus OX=9925 GN=ELSPBP1 PE=4 SV=1	ELSPBP1	24.707	84.3	21	68	21	0.907	0.986	0.603	0.932	1.105	1.876	0.963	0.884	1.083	1.037	1.289	0.199883
A0A452DY24	PRDX2(predicted) OS=Capra hircus OX=9925 GN=PRDX2 PE=4 SV=1	PRDX2	21.786	18.2	3	5	3	0.862	1.423	1.067	1.027	1.443	0.806	0.731	1.009	0.915	0.917	0.752	0.044885
A0A452DYD4	Putative cell division control protein 42 (Fragment)(predicted) OS=Capra hircus OX=9925 PE=4 SV=1	---	20.245	26.9	4	4	2	0.94	0.899	1.218	0.994	0.924	0.946	1.138	1.175	1.214	1.014	1.103	0.20388
A0A452DYG7	Common salivary protein BSP30 form C(predicted) OS=Capra hircus OX=9925 GN=LOC102171351 PE=4 SV=1	LOC102171351	17.361	16.1	2	4	2	0.67	1.314	2.118	0.651	1.181	0.745	0.887	0.767	1.548	0.648	0.774	0.46242
A0A452DYJ3	Cytochrome P450 4F22(predicted) OS=Capra hircus OX=9925 GN=CYP4F22 PE=4 SV=1	CYP4F22	61.638	2.3	1	1	1	1.32	0.77	0.581	0.794	0.763	0.728	1.122	1.604	1.345	1.431	1.474	0.076439
A0A452DYK8	thioredoxin reductase 3 isoform X1(predicted) OS=Capra hircus OX=9925 GN=TXNRD3 PE=4 SV=1	TXNRD3	70.33	1.4	1	1	1	1.069	0.749	0.811	1.418	0.819	1.493	1.121	0.858	1.041	1.032	1.14	0.36272
A0A452DYL2	Phosphoinositide-3-kinase-interacting protein 1(predicted) OS=Capra hircus OX=9925 GN=PIK3IP1 PE=4 SV=1	PIK3IP1	27.556	4.3	1	1	1	0.931	1.155	1.462	1.327	1.484	0.837	0.778	1.163	0.769	0.615	0.655	0.0125387
A0A452DYR7	Cystatin(predicted) OS=Capra hircus OX=9925 GN=LOC102184534 PE=4 SV=1	LOC102184534	18.024	29.3	8	29	8	0.766	1.085	1.166	0.736	0.928	0.997	1.123	1.592	1.037	0.96	1.22	0.165282
A0A452DYS4	Cation-dependent mannose-6-phosphate receptor(predicted) OS=Capra hircus OX=9925 GN=M6PR PE=4 SV=1	M6PR	31.267	12.5	3	3	3	1.513	1.089	1.03	1.584	1.003	0.81	0.74	0.901	0.943	0.808	0.676	0.008155
A0A452DYS7	MLYCD protein(predicted) OS=Capra hircus OX=9925 GN=MLYCD PE=4 SV=1	MLYCD	55.174	11.6	4	4	4	1.224	0.882	1.129	1.214	0.973	0.866	0.949	1.216	1.104	0.921	0.932	0.4601
A0A452DYT9	Protocadherin gamma subfamily A, 7 OS=Capra hircus OX=9925 GN=PCDHGA7 PE=4 SV=1	PCDHGA7	87.471	5.1	3	3	3	0.86	0.966	1.185	0.916	0.982	1.267	1.084	1.337	0.925	0.987	1.141	0.188298
A0A452DYV1	Proliferation-associated protein 2G4 (Fragment)(predicted) OS=Capra hircus OX=9925 GN=PA2G4 PE=4 SV=1	PA2G4	41.948	21.7	8	9	8	1.24	0.805	0.721	1.424	0.919	1.423	0.981	0.941	0.945	0.818	1	0.9268
A0A452DYV8	Alpha-2-glycoprotein 1, zinc-binding(predicted) OS=Capra hircus OX=9925 GN=AZGP1 PE=4 SV=1	AZGP1	33.821	56.9	22	135	22	1.018	1.065	1.175	0.97	0.927	0.645	0.854	1.295	1.338	0.981	0.992	0.79008
A0A452DYZ1	Peptidylprolyl isomerase (Fragment)(predicted) OS=Capra hircus OX=9925 GN=LOC108637382 PE=4 SV=1	LOC108637382	11.909	25	2	15	2	1.204	1.017	0.951	1.156	1.149	1.107	1.047	0.877	0.82	0.92	0.871	0.084303
A0A452DZ19	LRP11 isoform 3(predicted) OS=Capra hircus OX=9925 GN=LOC108636740 PE=4 SV=1	LOC108636740	31.159	15.2	3	4	3	0.943	0.814	1.18	0.874	0.813	1.087	1.806	0.835	1.212	0.77	1.235	0.32832
A0A452DZ25	NEDD8-activating enzyme E1 regulatory subunit(predicted) OS=Capra hircus OX=9925 GN=NAE1 PE=4 SV=1	NAE1	57.66	21.4	10	11	10	0.837	0.904	0.837	0.94	0.945	1.328	1.271	1.007	1.011	1.118	1.285	0.0045992
A0A452DZ43	Fructose-bisphosphate aldolase(predicted) OS=Capra hircus OX=9925 GN=ALDOC PE=4 SV=1	ALDOC	39.407	24.2	10	17	3	1.149	1.116	1.064	1.228	1.052	0.877	0.929	1.134	0.834	1.112	0.871	0.068021
A0A452DZ50	Actin-like protein 9(predicted) OS=Capra hircus OX=9925 GN=ACTL9 PE=4 SV=1	ACTL9	45.514	15.4	5	5	5	1.527	0.99	1.306	1.22	0.925	1.337	0.946	0.872	0.651	0.814	0.774	0.109805
A0A452DZ71	GLOD4 protein(predicted) OS=Capra hircus OX=9925 GN=GLOD4 PE=4 SV=1	GLOD4	33.175	9.5	3	3	3	1.095	0.86	0.831	1.056	1.056	2.361	0.719	0.908	0.842	0.864	1.163	0.8312
A0A452DZ75	Epididymal-specific lipocalin-6 (Fragment)(predicted) OS=Capra hircus OX=9925 GN=LCN6 PE=4 SV=1	LCN6	18.074	15.2	2	6	2	1.337	0.948	0.9	1.489	0.838	1.196	0.999	0.916	0.91	0.801	0.875	0.40738
A0A452DZA2	Outer dense fiber protein 2(predicted) OS=Capra hircus OX=9925 GN=ODF2 PE=4 SV=1	ODF2	95.509	21.8	15	17	15	1.467	1.19	1.898	1.213	1.174	0.526	0.647	0.676	0.695	0.657	0.461	8.2626e-05
A0A452DZA3	eukaryotic peptide chain release factor GTP-binding subunit ERF3A(predicted) OS=Capra hircus OX=9925 GN=GSPT1 PE=4 SV=1	GSPT1	66.673	15.4	10	11	10	0.952	0.828	0.868	0.979	0.793	1.166	1.35	1.167	1.142	1.134	1.348	0.00039694
A0A452DZA7	IGLV2-23 isoform 1 (Fragment)(predicted) OS=Capra hircus OX=9925 PE=4 SV=1	---	12.074	13.9	2	10	1	0.686	0.584	5.961	0.504	0.697	0.607	0.264	0.336	0.699	0.337	0.266	0.129462
A0A452DZD6	Immunoglobulin light chain, lambda gene cluster(predicted) OS=Capra hircus OX=9925 PE=4 SV=1	---	11.298	77.4	10	60	9	0.882	1.644	1.62	0.865	1.8	0.47	0.709	0.857	0.701	0.675	0.501	0.0082823
A0A452DZE0	Betaine--homocysteine S-methyltransferase 1(predicted) OS=Capra hircus OX=9925 GN=BHMT PE=4 SV=1	BHMT	44.665	63.8	19	44	19	0.917	0.884	0.654	0.882	0.885	1.774	1.329	0.92	1.001	1.133	1.458	0.026964
A0A452DZE4	Diazepam-binding inhibitor-like 5(predicted) OS=Capra hircus OX=9925 GN=LOC102175985 PE=4 SV=1	LOC102175985	9.7883	54	6	14	6	0.84	0.531	0.661	0.808	0.461	2.337	1.525	1.193	1.062	1.082	2.181	0.0037634
A0A452DZE7	Protein S100(predicted) OS=Capra hircus OX=9925 GN=S100A11 PE=4 SV=1	S100A11	11.278	19.4	3	3	3	0.885	1.551	1.42	0.975	1.667	0.757	0.635	0.654	0.979	0.899	0.604	0.0131199
A0A452DZE9	Lysophospholipase I(predicted) OS=Capra hircus OX=9925 GN=LYPLA1 PE=4 SV=1	LYPLA1	23.59	31.8	5	13	5	0.904	0.945	0.797	0.9	1.015	1.461	1.243	0.986	0.94	1.088	1.254	0.042238
A0A452DZI2	Protein FAM234A(predicted) OS=Capra hircus OX=9925 GN=FAM234A PE=4 SV=1	FAM234A	58.585	6.2	3	3	3	1.117	0.992	1.081	1.165	1.002	1.268	0.92	0.952	1.079	0.908	0.957	0.49536
A0A452DZI9	NADH dehydrogenase [ubiquinone] 1 alpha subcomplex subunit 7(predicted) OS=Capra hircus OX=9925 GN=NDUFA7 PE=4 SV=1	NDUFA7	14.053	15.1	2	2	2	0.829	1.09	0.905	0.802	0.907	1.45	1.105	1.116	0.924	1.32	1.305	0.025078
A0A452DZJ3	Trafficking protein particle complex 6B(predicted) OS=Capra hircus OX=9925 GN=TRAPPC6B PE=4 SV=1	TRAPPC6B	17.983	5.1	1	1	1	0.82	0.91	0.868	0.97	0.754	1.266	1.495	1.315	1.254	0.825	1.424	0.0147214
A0A452DZK5	Proteasome subunit alpha type(predicted) OS=Capra hircus OX=9925 GN=PSMA5 PE=4 SV=1	PSMA5	26.411	50.6	10	29	10	1.116	0.974	0.948	1.111	1.056	1.204	1.005	0.883	0.918	1	0.963	0.52616
A0A452DZN3	Cell cycle control protein(predicted) OS=Capra hircus OX=9925 GN=TMEM30B PE=4 SV=1	TMEM30B	39.415	4	1	1	1	1.263	1.228	0.819	1.086	1.195	0.756	0.939	0.916	1.169	1.036	0.861	0.20494
A0A452DZP2	Interferon alpha-C(predicted) OS=Capra hircus OX=9925 GN=LOC102174842 PE=4 SV=1	LOC102174842	21.308	4.8	1	1	1	0.819	0.795	0.518	0.823	0.722	1.613	1.543	1.096	1.215	1.26	1.829	0.00070396
A0A452DZQ3	NIF3-like protein 1(predicted) OS=Capra hircus OX=9925 GN=NIF3L1 PE=4 SV=1	NIF3L1	41.92	12.7	5	5	5	0.997	1.103	1.089	0.98	0.994	1.211	1.089	0.97	0.964	1.048	1.023	0.68636
A0A452DZT8	heat shock 70 kDa protein 4(predicted) OS=Capra hircus OX=9925 GN=HSPA4 PE=4 SV=1	HSPA4	94.472	37.7	27	47	24	0.918	0.805	0.787	1.04	0.759	1.665	1.36	0.99	0.935	1.094	1.403	0.029825
A0A452DZU0	Serpin A3-7 (Fragment)(predicted) OS=Capra hircus OX=9925 GN=LOC102174926 PE=4 SV=1	LOC102174926	52.671	27.2	14	28	12	1.069	1.262	1.762	1.065	1.26	0.698	0.726	1.155	0.79	0.727	0.638	0.0086615
A0A452DZU5	choline/ethanolamine kinase(predicted) OS=Capra hircus OX=9925 GN=CHKB PE=4 SV=1	CHKB	45.159	4.3	1	1	1	1.115	0.913	1.042	0.981	1.195	0.933	1.058	1.132	1.047	1.033	0.992	0.922
A0A452DZV3	Oncostatin-M-specific receptor subunit beta (Fragment)(predicted) OS=Capra hircus OX=9925 GN=OSMR PE=4 SV=1	OSMR	106.72	7.6	8	11	8	0.982	1.109	1.197	1.005	1.074	0.835	1.006	1.35	0.982	0.953	0.955	0.53272
A0A452DZV9	ZNRF2 protein(predicted) OS=Capra hircus OX=9925 GN=ZNRF2 PE=4 SV=1	ZNRF2	23.799	5.1	1	1	1	1.051	1.111	0.857	1.055	1.117	1.195	1.044	1.096	0.965	0.963	1.014	0.81954
A0A452DZW3	Ribosome biogenesis protein WDR12(predicted) OS=Capra hircus OX=9925 GN=WDR12 PE=4 SV=1	WDR12	47.766	1.7	1	1	1	1.063	0.793	0.847	0.822	0.784	1.858	0.948	1.46	0.923	1.028	1.443	0.054637
A0A452DZX1	Alpha-1,3-mannosyl-glycoprotein 2-beta-N-acetylglucosaminyltransferase(predicted) OS=Capra hircus OX=9925 GN=MGAT1 PE=4 SV=1	MGAT1	51.702	15.9	6	7	6	0.967	1.033	1.187	0.931	1.001	0.854	1.014	1.269	1.099	1.045	1.032	0.73672
A0A452DZX8	Anoctamin(predicted) OS=Capra hircus OX=9925 GN=ANO5 PE=4 SV=1	ANO5	100.36	2.9	2	2	2	2.537	0.802	0.857	2.184	1.082	0.596	0.673	0.58	0.615	0.485	0.395	0.029443
A0A452DZY0	calcium-binding tyrosine phosphorylation-regulated protein isoform X3(predicted) OS=Capra hircus OX=9925 GN=CABYR PE=4 SV=1	CABYR	41.28	29.1	10	13	10	1.722	1.295	1.27	1.712	1.584	0.473	0.522	0.531	0.48	0.553	0.337	2.1733e-07
A0A452DZY1	Large proline-rich protein BAT3(predicted) OS=Capra hircus OX=9925 GN=BAG6 PE=4 SV=1	BAG6	119.93	24.1	22	32	22	1.002	0.831	0.845	1.088	0.861	1.391	1.281	1.006	1.063	1.058	1.253	0.026703
A0A452DZZ5	Leucine-rich repeat-containing protein 57(predicted) OS=Capra hircus OX=9925 GN=LRRC57 PE=4 SV=1	LRRC57	26.813	29.7	7	10	7	0.825	0.933	0.844	0.818	0.87	1.287	1.21	1.075	1.083	1.318	1.392	0.000142445
A0A452E010	LOW QUALITY PROTEIN: lysophosphatidylcholine acyltransferase 2B-like(predicted) OS=Capra hircus OX=9925 PE=4 SV=1	---	58.125	8.1	4	4	4	1.16	0.811	0.899	1.183	0.826	1.156	1.253	0.792	0.987	1.313	1.127	0.36864
A0A452E021	DDRGK domain-containing protein 1(predicted) OS=Capra hircus OX=9925 GN=DDRGK1 PE=4 SV=1	DDRGK1	33.549	5.5	2	2	2	0.951	1.3	1.934	0.973	0.85	0.639	0.954	1.174	1.034	0.728	0.754	0.20034
A0A452E047	MHC class I antigen(predicted) OS=Capra hircus OX=9925 GN=LOC108633459 PE=4 SV=1	LOC108633459	41.49	10.3	3	4	0
A0A452E048	IPO4 protein(predicted) OS=Capra hircus OX=9925 GN=IPO4 PE=4 SV=1	IPO4	122.39	9.1	8	9	8	0.976	0.892	1.04	1.285	0.944	1.04	0.714	1.153	1.02	0.942	0.948	0.58926
A0A452E050	Ferritin(predicted) OS=Capra hircus OX=9925 PE=4 SV=1	---	19.948	40.6	6	8	1
A0A452E075	Beta-defensin-3(predicted) OS=Capra hircus OX=9925 PE=4 SV=1	---	7.5329	31.3	1	1	1	1.033	0.972	1.075	1.023	0.975	0.776	1.054	0.982	1.36	1.16	1.05	0.7485
A0A452E0A4	Epididymis secretory protein Li 108(predicted) OS=Capra hircus OX=9925 GN=TPM4 PE=4 SV=1	TPM4	28.521	6	1	1	1	1.046	1.179	1.114	0.86	1.094	0.827	1.143	1.29	0.992	0.944	0.982	0.7989
A0A452E0A7	Glutathione S-transferase(predicted) OS=Capra hircus OX=9925 GN=GSTM3 PE=4 SV=1	GSTM3	26.834	60.4	15	28	13	1.772	0.725	0.781	2.294	0.825	1.457	0.596	0.674	0.77	0.467	0.62	0.187476
A0A452E0C3	Heat shock protein family E (Hsp10) member 1(predicted) OS=Capra hircus OX=9925 GN=HSPE1 PE=4 SV=1	HSPE1	10.8	76.2	9	21	9	1.397	1.515	1.02	1.124	1.22	0.972	0.713	0.601	0.799	1.033	0.656	0.0079045
A0A452E0G5	eukaryotic translation initiation factor 4E(predicted) OS=Capra hircus OX=9925 GN=EIF4E PE=4 SV=1	EIF4E	25.093	6.5	1	1	1
A0A452E0H5	NADH-cytochrome b5 reductase 3(predicted) OS=Capra hircus OX=9925 GN=LOC102173645 PE=4 SV=1	LOC102173645	33.578	11.5	4	4	4	0.906	1.06	0.843	0.982	1.062	1.025	1.068	1.053	1.162	1.203	1.136	0.044982
A0A452E0J6	Sperm acrosome membrane-associated protein 4(predicted) OS=Capra hircus OX=9925 GN=SPACA4 PE=4 SV=1	SPACA4	13.049	33.3	2	8	2	1.263	1.129	1.218	1.09	1.159	0.528	0.647	0.842	0.797	0.703	0.6	0.0038202
A0A452E0N8	Chromosome 15 open reading frame 48 OS=Capra hircus OX=9925 GN=C15orf48 PE=4 SV=1	C15orf48	9.6333	28.9	3	3	3	2.526	0.596	1.607	2.213	0.594	0.67	0.622	0.537	0.579	0.508	0.387	0.071896
A0A452E0Q6	Acid ceramidase(predicted) OS=Capra hircus OX=9925 GN=ASAH1 PE=4 SV=1	ASAH1	43.214	30.9	13	21	13	0.987	0.985	0.942	1.049	0.957	1.222	1.049	1.077	1.276	0.941	1.131	0.075624
A0A452E0R1	HEAT repeat-containing protein 7A (Fragment)(predicted) OS=Capra hircus OX=9925 PE=4 SV=1	---	123	2.2	2	2	2	0.854	0.741	0.695	0.849	0.804	0.922	1.669	0.948	1.383	1.481	1.624	0.0068439
A0A452E0U0	Tetraspanin(predicted) OS=Capra hircus OX=9925 GN=CD81 PE=4 SV=1	CD81	25.765	8.5	1	1	1	1.034	1.257	0.801	1.117	1.15	0.726	0.719	1.501	1.168	1.028	0.96	0.67358
A0A452E0V0	eukaryotic peptide chain release factor subunit 1 isoform X1(predicted) OS=Capra hircus OX=9925 GN=ETF1 PE=4 SV=1	ETF1	49.03	14.2	6	7	6	1.1	0.755	0.867	1.094	0.861	1.257	1.33	1.025	1.124	1.037	1.234	0.043298
A0A452E0X4	Aminopeptidase(predicted) OS=Capra hircus OX=9925 GN=ERAP1 PE=4 SV=1	ERAP1	107	8.6	7	7	7	1	1.084	1.257	0.951	1.049	0.948	1.014	1.161	0.936	1.067	0.96	0.5385
A0A452E0Z2	Glyceraldehyde-3-phosphate dehydrogenase(predicted) OS=Capra hircus OX=9925 GN=GAPDHS PE=4 SV=1	GAPDHS	41.963	53.5	19	65	17	1.552	1.421	1.891	1.463	1.298	0.381	0.477	0.506	0.576	0.517	0.322	9.4939e-07
A0A452E0Z8	Shisa family member 5(predicted) OS=Capra hircus OX=9925 GN=SHISA5 PE=4 SV=1	SHISA5	23.575	12.4	1	3	1	0.828	1.342	1.011	0.826	1.234	1.291	0.821	1.005	1.053	0.841	0.956	0.77236
A0A452E104	Phosphoglycerate kinase(predicted) OS=Capra hircus OX=9925 GN=PGK1 PE=4 SV=1	PGK1	44.565	69.1	28	72	18	0.745	0.941	0.7	0.811	0.969	1.711	1.37	0.833	1.076	1.266	1.502	0.022004
A0A452E142	Hedgehog protein(predicted) OS=Capra hircus OX=9925 GN=DHH PE=4 SV=1	DHH	43.594	2.8	1	1	1
A0A452E158	Phospholipid-transporting ATPase(predicted) OS=Capra hircus OX=9925 GN=ATP11C PE=4 SV=1	ATP11C	123.84	26.5	26	42	25	0.987	0.888	1.058	1.07	1.046	1.022	1.171	1.042	1.007	1.124	1.063	0.21058
A0A452E192	DIS3-like exonuclease 1(predicted) OS=Capra hircus OX=9925 GN=DIS3L PE=4 SV=1	DIS3L	120.77	0.8	1	5	1	0.297	0.441	0.904	0.292	0.335	0.711	1.188	2.751	1.551	2.128	3.671	0.0033638
A0A452E1A4	Proteasome (Prosome, macropain) activator subunit 1 (PA28 alpha)(predicted) OS=Capra hircus OX=9925 GN=PSME1 PE=4 SV=1	PSME1	27.628	10.8	3	3	3	0.725	1.118	0.948	0.865	1.099	1.188	1.1	1.111	1.038	1.062	1.156	0.13358
A0A452E1A7	Out at first homolog(predicted) OS=Capra hircus OX=9925 GN=OAF PE=4 SV=1	OAF	37.644	20.9	6	9	6	0.763	1.083	1.346	0.772	1.056	1.535	1.144	1.223	0.903	0.664	1.089	0.7059
A0A452E1B3	Nucleotide exchange factor SIL1(predicted) OS=Capra hircus OX=9925 GN=SIL1 PE=4 SV=1	SIL1	51.867	18.3	7	9	7	0.815	1.208	1.029	0.952	0.978	0.886	0.98	1.642	1.148	0.803	1.096	0.64898
A0A452E1B4	Nuclear migration protein nudC (Fragment)(predicted) OS=Capra hircus OX=9925 GN=NUDC PE=4 SV=1	NUDC	38.293	17.5	5	6	5	0.95	0.831	0.851	1.031	0.873	1.625	1.053	1.075	0.993	1.164	1.303	0.03078
A0A452E1B9	Alkaline phosphatase(predicted) OS=Capra hircus OX=9925 GN=LOC102190876 PE=4 SV=1	LOC102190876	56.922	27.4	9	13	1	0.822	0.835	0.696	0.979	1.041	1.704	1.033	0.92	1.117	1.257	1.379	0.041342
A0A452E1D6	COP9 signalosome subunit 7B(predicted) OS=Capra hircus OX=9925 GN=COPS7B PE=4 SV=1	COPS7B	29.623	8.7	2	2	2	1.039	0.719	1.17	0.776	0.699	1.803	1.285	1.367	0.706	0.968	1.392	0.149882
A0A452E1E7	TFG protein(predicted) OS=Capra hircus OX=9925 GN=TFG PE=4 SV=1	TFG	43.338	14.2	4	5	4	1.037	0.879	0.914	1.108	0.886	1.207	1.298	0.971	0.924	1.14	1.148	0.129059
A0A452E1G3	Vascular cell adhesion molecule-1 6D variant lacking D7(predicted) OS=Capra hircus OX=9925 GN=LOC102175177 PE=4 SV=1	LOC102175177	72.28	1.7	1	1	1	0.619	1.733	0.745	0.895	1.834	0.873	0.837	1.029	0.943	0.93	0.792	0.57342
A0A452E1G8	Protease associated domain containing 1(predicted) OS=Capra hircus OX=9925 GN=PRADC1 PE=4 SV=1	PRADC1	21.081	11.2	2	3	2	0.819	1.154	1.356	0.857	1.206	0.813	0.918	1.215	1.247	0.9	0.945	0.69832
A0A452E1G9	Endoplasmin(predicted) OS=Capra hircus OX=9925 GN=HSP90B1 PE=4 SV=1	HSP90B1	92.467	33.3	29	60	28	1.251	0.859	0.88	1.438	0.79	1.55	0.82	1.026	0.874	0.815	0.975	0.86716
A0A452E1I4	Disintegrin and metalloproteinase domain-containing protein 2(predicted) OS=Capra hircus OX=9925 GN=ADAM2 PE=4 SV=1	ADAM2	80.143	11	7	17	7	1.44	1.187	1.289	1.36	1.37	0.806	0.772	0.654	0.717	0.849	0.571	4.3241e-06
A0A452E1I6	Dodecenoyl-Coenzyme A delta isomerase (3,2 trans-enoyl-Coenzyme A isomerase)(predicted) OS=Capra hircus OX=9925 GN=ECI1 PE=4 SV=1	ECI1	33.696	12.7	4	4	4	1.422	0.882	1.048	1.22	0.869	0.713	0.872	1.119	1.003	1.292	0.919	0.54946
A0A452E1K0	UMP-CMP kinase(predicted) OS=Capra hircus OX=9925 GN=CMPK1 PE=4 SV=1	CMPK1	25.985	23.7	5	6	5	0.842	0.793	0.737	0.889	0.8	1.208	1.421	0.998	1.216	1.47	1.555	0.00044194
A0A452E1K8	DPY30 domain-containing protein 1 isoform X3(predicted) OS=Capra hircus OX=9925 GN=DYDC1 PE=4 SV=1	DYDC1	20.779	8.5	2	2	2	1.532	1.523	1.004	1.36	1.881	0.595	0.641	0.576	0.683	0.612	0.426	0.00145671
A0A452E1L5	Golgi apparatus protein 1(predicted) OS=Capra hircus OX=9925 GN=GLG1 PE=4 SV=1	GLG1	130.44	25.9	27	33	27	0.923	1.131	1.006	0.935	1.166	1.092	1.022	1.11	0.971	0.937	0.994	0.9582
A0A452E1L9	cationic amino acid transporter 3-like(predicted) OS=Capra hircus OX=9925 GN=LOC102190544 PE=4 SV=1	LOC102190544	66.849	5.5	3	4	3	0.77	1.211	0.94	0.944	1.938	1.138	0.669	0.604	1.363	0.797	0.788	0.3248
A0A452E1Q2	ATP-binding cassette sub-family A member 17-like(predicted) OS=Capra hircus OX=9925 GN=LOC102183842 PE=4 SV=1	LOC102183842	188.85	8	13	16	13	1.345	1.009	0.989	1.274	1.31	0.926	0.924	0.78	0.9	0.946	0.755	0.0066008
A0A452E1Q3	Protein tweety homolog(predicted) OS=Capra hircus OX=9925 GN=TTYH3 PE=4 SV=1	TTYH3	57.37	2.7	1	1	1
A0A452E1R4	Folate gamma-glutamyl hydrolase(predicted) OS=Capra hircus OX=9925 GN=GGH PE=4 SV=1	GGH	35.587	22.6	7	16	7	1.097	1.265	0.948	1.054	1.447	0.926	0.867	0.876	0.917	0.872	0.767	0.0276
A0A452E1R9	Peroxiredoxin 1(predicted) OS=Capra hircus OX=9925 GN=PRDX1 PE=4 SV=1	PRDX1	22.209	31.2	7	16	5	1.631	0.942	0.894	1.907	1.042	1.311	0.614	0.722	0.633	0.63	0.609	0.047038
A0A452E1S9	Dynein light chain(predicted) OS=Capra hircus OX=9925 GN=DYNLL2 PE=4 SV=1	DYNLL2	10.35	56.2	6	26	3	1.189	1.5	0.835	1.124	1.519	1.075	0.819	0.641	0.739	0.86	0.67	0.02276
A0A452E1T9	Calicin(predicted) OS=Capra hircus OX=9925 GN=CCIN PE=4 SV=1	CCIN	66.861	17	9	10	9	1.217	1.014	2.373	1.295	1.073	0.707	0.651	0.749	0.611	0.706	0.491	0.0133388
A0A452E1U5	Hydroxysteroid dehydrogenase-like protein 2(predicted) OS=Capra hircus OX=9925 GN=HSDL2 PE=4 SV=1	HSDL2	45.155	24.4	10	13	10	1.38	0.924	0.833	1.319	0.864	1.253	0.899	0.804	0.936	1.196	0.956	0.8036
A0A452E1U9	Guanidinoacetate N-methyltransferase(predicted) OS=Capra hircus OX=9925 GN=GAMT PE=4 SV=1	GAMT	26.651	13.6	2	2	2
A0A452E1V4	Histone H2B(predicted) OS=Capra hircus OX=9925 GN=LOC102181083 PE=4 SV=1	LOC102181083	13.906	27	4	6	2	0.933	1.51	1.788	1.153	1.248	0.686	0.739	0.769	0.828	0.819	0.579	0.0110416
A0A452E1Y6	Transmembrane 9 superfamily member(predicted) OS=Capra hircus OX=9925 GN=TM9SF2 PE=4 SV=1	TM9SF2	75.606	1.5	1	1	1	1.672	1.169	0.95	1.392	1.005	0.886	0.703	0.943	0.923	0.81	0.689	0.0164027
A0A452E1Z0	ERCC excision repair 6 like, spindle assembly checkpoint helicase(predicted) OS=Capra hircus OX=9925 GN=ERCC6L PE=4 SV=1	ERCC6L	140.2	0.6	1	2	1	0.945	1.007	0.645	0.722	0.737	0.567	1.709	0.93	1.346	1.716	1.545	0.141462
A0A452E206	CCDC96 protein(predicted) OS=Capra hircus OX=9925 GN=CCDC96 PE=4 SV=1	CCDC96	61.984	2.9	1	1	1
A0A452E210	40S ribosomal protein SA (Fragment)(predicted) OS=Capra hircus OX=9925 GN=LOC102175427 PE=4 SV=1	LOC102175427	27.536	26	5	5	5	1.287	0.915	1.152	1.538	0.908	0.894	0.78	1.039	1.003	0.916	0.799	0.101002
A0A452E215	Bone morphogenetic protein 7 (Osteogenic protein 1)(predicted) OS=Capra hircus OX=9925 GN=BMP7 PE=4 SV=1	BMP7	42.074	3.6	1	2	1
A0A452E219	Cytochrome c oxidase subunit 5A, mitochondrial(predicted) OS=Capra hircus OX=9925 GN=LOC102191741 PE=4 SV=1	LOC102191741	16.824	16.4	2	2	2	2.541	0.751	1.141	1.566	0.711	0.742	0.749	0.558	0.753	0.889	0.55	0.119898
A0A452E238	LOW QUALITY PROTEIN: 60S ribosomal protein L7a-like(predicted) OS=Capra hircus OX=9925 GN=LOC102175205 PE=4 SV=1	LOC102175205	28.552	6.7	2	2	2	1.44	1.014	1.077	1.744	0.972	0.77	0.645	0.996	0.931	0.871	0.674	0.024358
A0A452E271	Family with sequence similarity 3 member D(predicted) OS=Capra hircus OX=9925 GN=FAM3D PE=4 SV=1	FAM3D	24.915	65	12	24	12	0.67	0.593	0.449	0.66	0.761	1.863	1.577	0.951	1.195	1.276	2.19	0.00073796
A0A452E275	Rho-related BTB domain-containing protein 2 isoform 1(predicted) OS=Capra hircus OX=9925 GN=RHOBTB2 PE=4 SV=1	RHOBTB2	79.009	1.6	1	1	1
A0A452E278	Eukaryotic translation initiation factor 3 subunit B(predicted) OS=Capra hircus OX=9925 GN=EIF3B PE=4 SV=1	EIF3B	89.344	7.9	5	5	5	1.187	0.834	0.838	1.23	0.863	1.101	0.975	1.108	1.011	1.014	1.052	0.51652
A0A452E290	Peptidyl-prolyl cis-trans isomerase FKBP4(predicted) OS=Capra hircus OX=9925 GN=FKBP4 PE=4 SV=1	FKBP4	51.522	27	12	16	12	1.003	0.887	0.802	1.114	0.859	1.374	1.076	1.026	1.017	0.867	1.149	0.193442
A0A452E294	Superoxide dismutase(predicted) OS=Capra hircus OX=9925 GN=SOD2 PE=4 SV=1	SOD2	24.58	41.4	8	23	8	1.734	1.231	1.575	1.668	1.184	0.697	0.556	0.45	0.609	0.704	0.408	5.545e-05
A0A452E2A0	DEP domain containing 1(predicted) OS=Capra hircus OX=9925 GN=DEPDC1 PE=4 SV=1	DEPDC1	92.472	1.1	1	1	1	1.205	1.114	0.818	0.915	1.297	1.388	1.16	0.799	0.883	0.838	0.947	0.6584
A0A452E2A6	Choline dehydrogenase(predicted) OS=Capra hircus OX=9925 GN=CHDH PE=4 SV=1	CHDH	65.532	1.7	1	1	1	1.501	1.123	1.401	1.305	1.388	0.642	0.771	0.785	0.609	0.918	0.554	0.000155333
A0A452E2A7	Coiled-coil domain containing 8(predicted) OS=Capra hircus OX=9925 GN=CCDC8 PE=4 SV=1	CCDC8	56.253	2	1	2	1	0.63	0.636	0.67	0.581	0.55	1.218	1.37	1.97	1.423	1.47	2.429	4.0387e-06
A0A452E2B3	Serine protease 23(predicted) OS=Capra hircus OX=9925 GN=PRSS23 PE=4 SV=1	PRSS23	42.329	9.9	3	3	3	0.818	1.819	1.077	0.808	1.286	0.688	0.953	1.034	0.989	0.985	0.8	0.30506
A0A452E2C0	Transthyretin(predicted) OS=Capra hircus OX=9925 GN=TTR PE=4 SV=1	TTR	13.633	36.2	5	10	5	1.199	1.037	1.543	1.14	1.036	0.822	0.844	1.171	0.84	0.689	0.733	0.0236
A0A452E2F6	Alpha-1-acid glycoprotein(predicted) OS=Capra hircus OX=9925 GN=AGP PE=4 SV=1	AGP	23.131	17.3	3	4	3	1.594	1.451	0.862	1.582	1.466	0.755	0.781	0.741	0.65	0.557	0.501	0.00087767
A0A452E2H1	Mitochondrial ATP synthase O subunit(predicted) OS=Capra hircus OX=9925 GN=ATP5PO PE=4 SV=1	ATP5PO	21.456	20.9	3	4	3	1.492	1.022	1.105	1.366	1.509	0.751	0.798	0.666	0.696	0.995	0.601	0.00142037
A0A452E2H7	Elongation factor 1-alpha(predicted) OS=Capra hircus OX=9925 GN=EEF1A1 PE=4 SV=1	EEF1A1	50.14	29.4	11	18	11	1.728	0.701	0.742	2.359	0.727	1.548	0.584	0.805	0.804	0.618	0.697	0.37608
A0A452E2H8	Metalloproteinase inhibitor 1(predicted) OS=Capra hircus OX=9925 GN=TIMP1 PE=4 SV=1	TIMP1	23.043	28.5	4	5	4	1.028	0.841	1.78	0.975	0.909	1.158	1.021	1.088	0.972	0.766	0.905	0.65152
A0A452E2I7	28S ribosomal protein S36, mitochondrial(predicted) OS=Capra hircus OX=9925 GN=LOC108633249 PE=4 SV=1	LOC108633249	11.589	11.7	1	1	1	1.553	1.346	0.498	0.72	0.83	1.265	1.179	0.536	0.683	1.714	1.087	0.79074
A0A452E2I9	SEC22 homolog B, vesicle trafficking protein (gene/pseudogene)(predicted) OS=Capra hircus OX=9925 GN=SEC22B PE=4 SV=1	SEC22B	24.756	4.2	1	1	1	1.132	1.067	1.112	1.396	1.059	1.133	0.868	1.036	0.763	0.909	0.817	0.042156
A0A452E2K8	Glycerophosphodiester phosphodiesterase 1(predicted) OS=Capra hircus OX=9925 GN=GDE1 PE=4 SV=1	GDE1	37.642	10.3	3	3	3	1.181	0.896	1.249	1.187	1.005	0.835	0.91	1.169	0.994	1.047	0.898	0.24348
A0A452E2L0	Prostate and testis expressed 1 OS=Capra hircus OX=9925 GN=PATE1 PE=4 SV=1	PATE1	13.159	35.7	5	7	5	1.089	0.782	0.889	1.196	0.961	1.896	1.113	0.765	0.915	0.602	1.076	0.98388
A0A452E2L2	HINT2(predicted) OS=Capra hircus OX=9925 GN=HINT2 PE=4 SV=1	HINT2	17.173	19.6	3	10	3	1.13	1.233	0.736	0.895	1.273	1.068	1.209	0.783	0.922	1.037	0.953	0.77426
A0A452E2P1	Ig alpha-1 chain C region (Fragment)(predicted) OS=Capra hircus OX=9925 PE=4 SV=1	---	34.884	21.3	6	22	6	0.446	2.726	1.076	0.777	3.193	0.312	0.368	0.472	0.37	0.441	0.239	0.036244
A0A452E2P8	GLIPR1-like protein 2 (Fragment)(predicted) OS=Capra hircus OX=9925 GN=GLIPR1L2 PE=4 SV=1	GLIPR1L2	28.847	22.6	4	4	4	1.235	1.195	1.45	1.155	1.248	0.75	0.783	0.847	0.755	1.031	0.663	0.00037993
A0A452E2Q2	MHC class I antigen (Fragment)(predicted) OS=Capra hircus OX=9925 PE=4 SV=1	---	42.039	9.8	4	6	1	0.452	3.147	0.511	0.56	3.46	0.525	0.531	0.438	0.399	0.368	0.278	0.134804
A0A452E2Q7	Junctional adhesion molecule 3 OS=Capra hircus OX=9925 GN=JAM3 PE=4 SV=1	JAM3	36.457	11.9	4	5	4	0.882	1.21	1.373	0.884	1.135	0.89	0.777	1.266	1.183	0.849	0.905	0.45234
A0A452E2Q8	Guanylate-binding protein 6(predicted) OS=Capra hircus OX=9925 GN=LOC108633177 PE=4 SV=1	LOC108633177	70.912	1.1	1	1	1	0.912	0.944	1.025	0.95	1.014	1.174	1.019	1.293	1.084	1.065	1.163	0.0142556
A0A452E2R6	15 kDa protein A(predicted) OS=Capra hircus OX=9925 GN=LOC102173049 PE=4 SV=1	LOC102173049	19.564	9.9	1	1	1	0.993	1.036	1.35	1.302	1.11	0.651	0.818	1.14	1.01	1.062	0.808	0.095279
A0A452E2T5	Solute carrier organic anion transporter family member(predicted) OS=Capra hircus OX=9925 GN=SLCO6A1 PE=4 SV=1	SLCO6A1	76.114	1.2	1	1	1	1.215	1.243	1.11	1.092	1.494	0.882	0.757	0.67	0.84	1.095	0.69	0.0051216
A0A452E356	26S protease regulatory subunit 6A (Fragment)(predicted) OS=Capra hircus OX=9925 GN=PSMC3 PE=4 SV=1	PSMC3	49.543	57.7	22	46	22	0.809	0.815	0.779	0.835	0.749	1.397	1.415	1.004	1.223	1.318	1.594	0.002177
A0A452E369	Angiogenin, ribonuclease, RNase A family, 5(predicted) OS=Capra hircus OX=9925 GN=LOC106502530 PE=4 SV=1	LOC106502530	16.936	21.6	4	4	4	1.14	1.33	1.875	1.197	1.053	0.248	1.296	0.59	0.56	0.742	0.521	0.028059
A0A452E387	Polypeptide N-acetylgalactosaminyltransferase 7(predicted) OS=Capra hircus OX=9925 GN=GALNT7 PE=4 SV=1	GALNT7	75.534	4.3	3	3	3	0.727	0.804	0.931	0.677	0.786	0.816	1.284	2.03	1.417	1.086	1.69	0.0160986
A0A452E398	Phosphatidylinositol 5-phosphate 4-kinase type-2 gamma(predicted) OS=Capra hircus OX=9925 GN=PIP4K2C PE=4 SV=1	PIP4K2C	47.14	5.9	3	3	3	0.82	0.825	0.773	0.818	0.739	1.141	1.316	1.127	1.145	1.689	1.615	0.0042974
A0A452E3C7	T-complex protein 1 subunit theta-like 2(predicted) OS=Capra hircus OX=9925 GN=CCT8L2 PE=4 SV=1	CCT8L2	56.623	5.6	2	2	2
A0A452E3F8	Torsin family 4 member A(predicted) OS=Capra hircus OX=9925 GN=TOR4A PE=4 SV=1	TOR4A	44.857	5.7	3	3	3	1.116	0.989	1.197	1.076	0.986	0.703	0.892	1.075	1.215	1.189	0.946	0.5227
A0A452E3L9	Calpain-11 (Fragment)(predicted) OS=Capra hircus OX=9925 GN=CAPN11 PE=4 SV=1	CAPN11	78.997	18.3	9	16	1	0.991	0.999	1.02	1.082	0.968	1.065	1.147	1.074	0.99	1.108	1.064	0.081403
A0A452E3Q7	RAB5B, member RAS oncogene family(predicted) OS=Capra hircus OX=9925 GN=RAB5B PE=4 SV=1	RAB5B	23.857	16.2	3	5	1	0.686	1.022	1.144	0.918	1.067	1.046	1.203	1.427	0.998	0.996	1.172	0.184903
A0A452E3R3	Calpain-11 (Fragment)(predicted) OS=Capra hircus OX=9925 GN=CAPN11 PE=4 SV=1	CAPN11	80.545	21.7	11	20	3	1.015	0.691	0.52	0.894	0.743	1.333	1.561	0.868	1.355	1.293	1.659	0.0093642
A0A452E3S6	Interstitial collagenase(predicted) OS=Capra hircus OX=9925 GN=MMP1 PE=4 SV=1	MMP1	53.198	7.1	3	3	3	2.475	0.746	0.814	2.834	0.806	0.807	0.568	0.496	0.455	0.418	0.358	0.025537
A0A452E3X0	Dihydropteridine reductase(predicted) OS=Capra hircus OX=9925 GN=QDPR PE=4 SV=1	QDPR	25.575	34.3	5	7	5	1.051	1.057	1.107	0.982	1.069	0.992	0.877	1.274	1.048	1.1	1.005	0.97596
A0A452E3X4	SLC25A20(predicted) OS=Capra hircus OX=9925 GN=SLC25A20 PE=4 SV=1	SLC25A20	32.939	7	2	2	2	1.286	0.88	2.188	1.234	0.843	0.528	0.725	1.243	0.623	1.003	0.641	0.099581
A0A452E3X6	Adhesion G protein-coupled receptor E5(predicted) OS=Capra hircus OX=9925 GN=ADGRE5 PE=4 SV=1	ADGRE5	80.238	7.4	6	7	6	0.983	1.059	1.263	0.924	1.024	0.723	1.37	1.163	0.983	1.058	1.008	0.95078
A0A452E3Z2	Small integral membrane protein 12(predicted) OS=Capra hircus OX=9925 GN=SMIM12 PE=4 SV=1	SMIM12	10.751	12	1	1	1	1.306	1.094	1.309	1.054	0.949	0.764	0.98	1.39	0.794	0.89	0.843	0.170898
A0A452E410	transmembrane protein 59 isoform X3(predicted) OS=Capra hircus OX=9925 GN=TMEM59 PE=4 SV=1	TMEM59	36.208	6.8	1	1	1	1.196	1.167	1.098	1.04	1.021	0.924	0.877	1.286	0.857	1.032	0.901	0.195217
A0A452E416	Acetyl-CoA acyltransferase 1(predicted) OS=Capra hircus OX=9925 GN=ACAA1 PE=4 SV=1	ACAA1	42.384	7.1	2	2	2	0.922	0.971	1.224	1.002	1.262	1.007	1.074	0.859	1.053	1.045	0.936	0.4436
A0A452E455	Placenta-expressed transcript 1 protein (Fragment)(predicted) OS=Capra hircus OX=9925 GN=LOC102177258 PE=4 SV=1	LOC102177258	28.017	25.4	6	15	6	1.146	0.922	1.798	1.179	0.954	0.743	0.966	0.934	0.92	0.713	0.713	0.047115
A0A452E463	Secernin-3(predicted) OS=Capra hircus OX=9925 GN=SCRN3 PE=4 SV=1	SCRN3	48.275	4.7	2	2	2	1.575	0.745	1.681	1.551	0.67	1.038	0.503	1.054	0.783	0.918	0.69	0.2133
A0A452E471	Solute carrier family 2, facilitated glucose transporter member 5(predicted) OS=Capra hircus OX=9925 GN=LOC102178379 PE=4 SV=1	LOC102178379	49.364	7.2	4	12	2	1.394	1.329	1.296	1.297	1.462	0.863	0.62	0.529	0.73	0.89	0.536	0.0031847
A0A452E480	L-lactate dehydrogenase(predicted) OS=Capra hircus OX=9925 GN=LDHB PE=4 SV=1	LDHB	36.481	28.1	9	21	6	0.96	1.131	0.954	1.094	1.226	1.186	0.761	0.855	1.204	0.898	0.914	0.35382
A0A452E481	Ciliary neurotrophic factor receptor(predicted) OS=Capra hircus OX=9925 GN=CNTFR PE=4 SV=1	CNTFR	40.661	3.5	1	1	1	1.02	0.907	1.214	1.268	0.807	1.043	0.836	1.416	0.933	1.077	1.017	0.90394
A0A452E4A8	Guanine nucleotide-binding protein G(I)/G(S)/G(T) subunit beta-1(predicted) OS=Capra hircus OX=9925 GN=GNB1 PE=4 SV=1	GNB1	35.493	20	5	9	3	0.981	1.157	1.054	1.076	1.304	0.874	0.83	1.236	1.075	0.919	0.885	0.182935
A0A452E4F5	Ribonuclease 4 (Fragment)(predicted) OS=Capra hircus OX=9925 GN=RNASE4 PE=4 SV=1	RNASE4	18.554	57.7	10	48	10	1.125	0.895	1.192	1.084	0.839	0.897	1.743	1.151	0.772	0.6	1.005	0.7883
A0A452E4F6	Testis-specific lysozyme-like protein 6(predicted) OS=Capra hircus OX=9925 GN=LYZL6 PE=4 SV=1	LYZL6	16.569	18.9	3	5	3	1.543	1.411	1.053	1.44	1.419	0.707	0.661	0.725	0.689	0.694	0.506	0.0005827
A0A452E4H7	CTAGE family, member 5(predicted) OS=Capra hircus OX=9925 GN=CTAGE5 PE=4 SV=1	CTAGE5	91.865	2.1	1	1	1
A0A452E4K0	Cystatin(predicted) OS=Capra hircus OX=9925 GN=CST6 PE=4 SV=1	CST6	16.426	63.8	9	15	9	1.436	0.921	0.982	1.606	0.975	0.837	0.828	0.922	0.968	0.794	0.735	0.077443
A0A452E4M4	dynein heavy chain 7, axonemal(predicted) OS=Capra hircus OX=9925 GN=DNAH7 PE=4 SV=1	DNAH7	460.49	5	19	20	15	1.544	1.092	1.065	1.482	1.279	0.612	0.529	0.816	0.714	0.676	0.518	0.00024495
A0A452E4U4	5'-nucleotidase(predicted) OS=Capra hircus OX=9925 GN=NT5E PE=4 SV=1	NT5E	63.222	54.9	28	81	28	0.907	0.95	1.442	0.861	0.903	0.87	0.971	1.297	1.163	0.985	1.044	0.66942
A0A452E4W0	ARSG protein(predicted) OS=Capra hircus OX=9925 GN=ARSG PE=4 SV=1	ARSG	56.552	4.4	2	2	1	1.298	1.106	1.004	1.448	1.376	0.687	0.887	1.246	0.803	0.643	0.685	0.0185973
A0A452E4W7	Polypeptide N-acetylgalactosaminyltransferase (Fragment)(predicted) OS=Capra hircus OX=9925 GN=GALNT2 PE=4 SV=1	GALNT2	64.349	20.1	11	13	10	0.84	1.086	1.109	0.838	1.202	0.795	0.974	1.345	1.11	0.964	1.022	0.88008
A0A452E4Y9	Glycerol kinase 2(predicted) OS=Capra hircus OX=9925 GN=GK2 PE=4 SV=1	GK2	60.834	26.5	13	25	6	1.742	1.01	1.211	1.851	1.202	0.556	0.621	0.698	0.754	0.707	0.475	0.00050494
A0A452E500	Stanniocalcin-1(predicted) OS=Capra hircus OX=9925 GN=STC1 PE=4 SV=1	STC1	27.536	13.4	3	5	3	1.06	0.944	0.914	1.099	1.126	1.127	1.183	0.907	1.087	0.828	0.998	0.9245
A0A452E516	Coiled-coil domain-containing protein 58(predicted) OS=Capra hircus OX=9925 GN=CCDC58 PE=4 SV=1	CCDC58	16.708	31.9	4	6	4	1.451	1.472	1.128	1.316	1.606	0.707	0.599	0.689	0.877	0.589	0.496	6.4086e-05
A0A452E527	Trafficking protein particle complex subunit 8(predicted) OS=Capra hircus OX=9925 GN=TRAPPC8 PE=4 SV=1	TRAPPC8	159.98	4.6	7	7	7	1.032	0.925	0.781	1.007	0.966	0.972	1.503	1.045	1.064	1.072	1.201	0.08966
A0A452E545	Angiotensinogen(predicted) OS=Capra hircus OX=9925 GN=AGT PE=4 SV=1	AGT	51.319	10.5	4	5	4	0.94	1.194	1.482	0.852	1.425	0.913	0.926	0.949	0.927	0.792	0.765	0.098277
A0A452E566	translin(predicted) OS=Capra hircus OX=9925 GN=TSN PE=4 SV=1	TSN	26.169	33.3	7	9	7	0.981	0.921	0.849	1.087	0.969	1.442	1.074	0.92	1.006	1.003	1.133	0.2234
A0A452E570	cullin-associated NEDD8-dissociated protein 1(predicted) OS=Capra hircus OX=9925 GN=CAND1 PE=4 SV=1	CAND1	136.4	37.7	43	75	43	1.021	0.992	0.699	1.133	0.94	1.495	1.254	0.89	0.974	0.932	1.159	0.30904
A0A452E573	ATP synthase subunit beta(predicted) OS=Capra hircus OX=9925 GN=ATP5F1B PE=4 SV=1	ATP5F1B	56.183	31.4	12	26	12	1.476	0.967	1.03	1.42	0.976	0.675	0.822	0.885	0.873	0.998	0.725	0.025105
A0A452E5A0	NELL2 isoform 13(predicted) OS=Capra hircus OX=9925 GN=NELL2 PE=4 SV=1	NELL2	90.803	9.8	7	10	7	0.964	1.338	1.137	1.082	1.271	0.756	0.85	1.195	0.934	0.748	0.774	0.034161
A0A452E5A3	Prostate and testis expressed 3 OS=Capra hircus OX=9925 GN=PATE3 PE=4 SV=1	PATE3	14.392	18.9	3	4	3	1.069	0.857	0.956	0.761	1.034	1.661	1.514	0.745	1.006	0.506	1.161	0.7916
A0A452E5A7	Protein tyrosine phosphatase, receptor type J(predicted) OS=Capra hircus OX=9925 GN=PTPRJ PE=4 SV=1	PTPRJ	130.89	1.7	1	1	1	0.932	0.946	0.968	1.13	1.173	1.044	1.121	1.209	1.197	0.751	1.034	0.8206
A0A452E5A8	Ribonuclease A family member 12 (inactive) OS=Capra hircus OX=9925 GN=RNASE12 PE=4 SV=1	RNASE12	16.989	62.1	11	24	11	0.922	1.211	1.034	0.953	1.205	0.918	0.817	1.204	1.085	0.847	0.915	0.34642
A0A452E5B4	Peroxiredoxin(predicted) OS=Capra hircus OX=9925 GN=PRDX5 PE=4 SV=1	PRDX5	22.457	48.1	10	25	10	1.085	0.73	0.557	0.928	0.706	1.619	1.488	0.839	1.026	1.162	1.531	0.034537
A0A452E5C9	Putative splicing factor arginine/serine-rich 1-like protein (Fragment)(predicted) OS=Capra hircus OX=9925 GN=SRSF1 PE=4 SV=1	SRSF1	27.744	4	1	1	1
A0A452E5D6	Beta-defensin(predicted) OS=Capra hircus OX=9925 GN=LOC106503657 PE=4 SV=1	LOC106503657	7.3567	38.5	4	4	4	0.907	0.956	0.987	0.945	1.162	1.296	1.198	1.045	1	0.905	1.098	0.28054
A0A452E5G1	MYH11 protein(predicted) OS=Capra hircus OX=9925 GN=MYH11 PE=4 SV=1	MYH11	223.88	1.7	2	2	1	0.665	0.795	0.66	0.878	1.212	1.79	1.784	0.757	0.973	0.866	1.466	0.15132
A0A452E5G9	BMP/retinoic acid-inducible neural-specific protein 1(predicted) OS=Capra hircus OX=9925 GN=BRINP1 PE=4 SV=1	BRINP1	88.604	1.1	1	1	1	0.803	1.1	0.872	1.135	1.14	0.878	0.852	1.407	1.117	1.177	1.075	0.5981
A0A452E5L4	Beta defensin OBD130(predicted) OS=Capra hircus OX=9925 GN=LOC108634084 PE=4 SV=1	LOC108634084	8.8636	29.1	2	4	2	1.243	0.94	1.768	1.336	1.221	0.936	0.714	0.58	0.637	0.87	0.574	0.0036604
A0A452E5M9	Neogenin 1(predicted) OS=Capra hircus OX=9925 GN=NEO1 PE=4 SV=1	NEO1	150.55	5.1	6	7	6	0.981	1.131	1.121	1.037	1.072	0.74	1.067	1.488	1.131	0.812	0.981	0.71662
A0A452E5N4	Stress-induced-phosphoprotein 1(predicted) OS=Capra hircus OX=9925 GN=STIP1 PE=4 SV=1	STIP1	62.564	30.9	17	19	17	1.352	0.829	0.834	1.492	0.806	1.723	0.84	0.862	0.846	0.74	0.943	0.72808
A0A452E5P5	Phosphorylase b kinase regulatory subunit(predicted) OS=Capra hircus OX=9925 GN=PHKA2 PE=4 SV=1	PHKA2	116.1	2.8	2	2	2	1.026	1.021	1.053	0.969	0.939	0.945	1.212	1.038	1.108	1.12	1.083	0.13668
A0A452E5Q7	Putative hydroxypyruvate isomerase(predicted) OS=Capra hircus OX=9925 GN=HYI PE=4 SV=1	HYI	30.464	44.8	8	9	8	1.003	1.013	1.024	1.092	0.966	1.097	0.984	1.035	1.032	1.101	1.03	0.3451
A0A452E5S2	Exocyst complex component 7(predicted) OS=Capra hircus OX=9925 GN=EXOC7 PE=4 SV=1	EXOC7	74.847	1.5	1	1	1	2.035	0.646	1.012	2.118	1.172	0.764	0.618	0.502	0.681	0.836	0.487	0.028761
A0A452E5S9	Extracellular matrix protein 1(predicted) OS=Capra hircus OX=9925 GN=ECM1 PE=4 SV=1	ECM1	58.509	69.8	43	176	43	0.885	0.916	1.189	0.876	0.844	0.883	0.965	1.624	1.052	1.12	1.198	0.21032
A0A452E5V4	Mannosyl (alpha-1,6-)-glycoprotein beta-1,2-N-acetylglucosaminyltransferase(predicted) OS=Capra hircus OX=9925 GN=MGAT2 PE=4 SV=1	MGAT2	51.554	24.9	9	10	9	0.932	1.029	1.106	0.945	1.085	1.16	0.966	1.14	1.11	1.056	1.066	0.2192
A0A452E5V6	Na(+)/H(+) exchange regulatory cofactor NHE-RF(predicted) OS=Capra hircus OX=9925 GN=SLC9A3R1 PE=4 SV=1	SLC9A3R1	38.365	8.5	3	4	3	0.863	0.986	0.962	0.864	1.009	1.526	0.855	1.107	1.351	0.981	1.243	0.147357
A0A452E5W0	Oxysterol-binding protein(predicted) OS=Capra hircus OX=9925 GN=OSBP2 PE=4 SV=1	OSBP2	100.82	17.4	14	21	14	0.872	0.804	0.788	0.882	0.831	1.348	1.375	1.033	1.156	1.283	1.483	0.000142402
A0A452E5W8	Myosin VIIB(predicted) OS=Capra hircus OX=9925 GN=MYO7B PE=4 SV=1	MYO7B	240.36	0.5	1	1	1	0.309	0.61	0.39	0.265	0.265	0.219	0.248	0.497	0.371	6.825	4.437	0.4715
A0A452E5X4	Glutathione S-transferase omega-1(predicted) OS=Capra hircus OX=9925 GN=LOC102190016 PE=4 SV=1	LOC102190016	27.122	18.7	5	5	5	0.801	1.019	0.658	0.732	0.965	1.63	1.195	0.905	1.149	1.252	1.469	0.0160776
A0A452E611	Selenoprotein F OS=Capra hircus OX=9925 GN=SELENOF PE=4 SV=1	SELENOF	14.71	18.8	2	3	2	0.723	1.458	1.893	0.81	1.069	0.707	0.944	1.439	0.823	0.775	0.788	0.37024
A0A452E613	Transaldolase(predicted) OS=Capra hircus OX=9925 GN=TALDO1 PE=4 SV=1	TALDO1	31.724	39.9	13	21	7	0.871	1.091	0.742	0.996	1.098	1.505	1.065	0.853	0.98	1.088	1.144	0.31824
A0A452E625	Protein kinase C and casein kinase substrate in neurons 2(predicted) OS=Capra hircus OX=9925 GN=PACSIN2 PE=4 SV=1	PACSIN2	55.892	23.7	10	12	10	0.888	1.071	1.059	1.039	1.155	1.117	0.835	1.237	1.059	0.881	0.984	0.7927
A0A452E630	Phospholipid scramblase(predicted) OS=Capra hircus OX=9925 GN=LOC102175808 PE=4 SV=1	LOC102175808	27.517	10.6	2	4	2	1.291	0.962	1.289	1.132	1.132	0.914	1.033	0.642	0.964	1.036	0.79	0.046942
A0A452E631	GMP reductase 2(predicted) OS=Capra hircus OX=9925 GN=GMPR2 PE=4 SV=1	GMPR2	37.987	24.7	8	12	8	0.82	0.934	0.722	0.842	0.998	1.251	1.236	1.089	1.157	1.244	1.385	0.00070028
A0A452E650	Cation-independent mannose-6-phosphate receptor(predicted) OS=Capra hircus OX=9925 GN=IGF2R PE=4 SV=1	IGF2R	273.97	19.1	44	65	44	0.901	1.212	1.244	0.913	1.15	0.823	0.924	1.254	1.038	0.903	0.912	0.38046
A0A452E652	DNA-directed RNA polymerase subunit beta(predicted) OS=Capra hircus OX=9925 GN=POLR2B PE=4 SV=1	POLR2B	133.87	0.7	1	1	1	0.927	0.803	0.777	0.872	1.054	1.596	1.181	0.698	1.118	1.334	1.337	0.116043
A0A452E680	NEU1(predicted) OS=Capra hircus OX=9925 GN=NEU1 PE=4 SV=1	NEU1	45.528	32	12	19	12	0.779	0.872	0.772	0.815	1.02	1.088	1.572	1.013	1.112	1.243	1.416	0.0061215
A0A452E6A2	Serpin A3-8(predicted) OS=Capra hircus OX=9925 GN=LOC102174291 PE=4 SV=1	LOC102174291	46.598	16.5	8	5	5	1.425	1.084	1.168	1.264	1.188	0.825	0.742	0.93	0.967	0.716	0.682	0.00088432
A0A452E6D4	Complement component 5(predicted) OS=Capra hircus OX=9925 GN=C5 PE=4 SV=1	C5	188.67	3.4	5	6	5	1.202	1.267	1.461	1.238	1.332	0.593	0.756	1.044	0.738	0.708	0.591	0.00054472
A0A452E6F3	cytochrome c oxidase subunit 7C, mitochondrial(predicted) OS=Capra hircus OX=9925 PE=4 SV=1	---	7.4576	14.3	1	1	1	1.434	1.005	1.778	1.415	0.724	0.663	0.795	0.973	0.774	0.934	0.651	0.052978
A0A452E6F8	Eukaryotic translation initiation factor 2 subunit 1(predicted) OS=Capra hircus OX=9925 GN=EIF2S1 PE=4 SV=1	EIF2S1	36.108	8.3	2	2	2	1.279	0.859	1.008	1.667	1.032	1.334	0.692	0.816	0.921	0.833	0.786	0.170779
A0A452E6G8	laminin subunit alpha-5(predicted) OS=Capra hircus OX=9925 GN=LAMA5 PE=4 SV=1	LAMA5	227.86	9.5	16	20	16	0.997	1.021	0.986	1.095	1.133	0.896	1.343	0.912	1.013	0.971	0.981	0.72426
A0A452E6J2	Aspartyl-tRNA synthetase, cytoplasmic(predicted) OS=Capra hircus OX=9925 GN=DARS PE=4 SV=1	DARS	57.096	24.2	10	13	10	1.167	0.848	0.751	1.441	0.852	1.051	1.135	0.851	0.943	0.958	0.976	0.994
A0A452E6K3	Beta-galactosidase(predicted) OS=Capra hircus OX=9925 GN=LOC102173955 PE=4 SV=1	LOC102173955	71.859	18.1	11	12	10	0.801	0.592	0.607	0.843	0.557	2.411	1.276	0.96	0.88	1.117	1.954	0.014562
A0A452E6L4	Valyl-tRNA synthetase(predicted) OS=Capra hircus OX=9925 GN=VARS PE=4 SV=1	VARS	140.1	26.3	29	43	29	1.767	0.779	0.807	2.252	0.771	1.02	0.64	0.789	0.761	0.691	0.612	0.14742
A0A452E6T8	Deleted in malignant brain tumors 1(predicted) OS=Capra hircus OX=9925 PE=4 SV=1	---	147.88	15.7	4	4	4	0.945	1.004	1.164	0.993	0.951	0.782	0.94	1.24	1.241	1.202	1.069	0.61078
A0A452E6V4	40S ribosomal protein S15a-like(predicted) OS=Capra hircus OX=9925 PE=4 SV=1	---	8.7161	18.2	1	1	1	1.029	0.979	0.827	1.439	1.065	0.749	0.931	1.346	1.222	0.889	0.962	0.75646
A0A452E6W2	RAB4A, member RAS oncogene family(predicted) OS=Capra hircus OX=9925 GN=RAB4A PE=4 SV=1	RAB4A	23.992	9.8	2	2	2	0.868	0.871	1.226	0.886	0.907	1.091	1.326	0.938	1.168	1.139	1.19	0.075177
A0A452E6W9	Amyloid beta precursor like protein 2(predicted) OS=Capra hircus OX=9925 GN=APLP2 PE=4 SV=1	APLP2	80.293	3.5	3	7	3	0.992	1.179	1.412	1.245	1.133	0.868	0.831	0.991	0.91	0.78	0.735	0.0025592
A0A452E6Y1	Prefoldin subunit 1(predicted) OS=Capra hircus OX=9925 GN=PFDN1 PE=4 SV=1	PFDN1	14.223	21.3	3	7	3	0.903	0.928	0.664	0.893	0.937	1.664	1.222	0.985	1.073	1.116	1.401	0.0185028
A0A452E6Z8	E3 ubiquitin-protein ligase CHIP(predicted) OS=Capra hircus OX=9925 GN=STUB1 PE=4 SV=1	STUB1	34.934	51.5	16	23	16	0.84	0.87	0.786	0.825	0.876	1.155	1.287	1.103	1.2	1.345	1.451	1.8823e-05
A0A452E712	Adenylate kinase isoenzyme 1(predicted) OS=Capra hircus OX=9925 GN=AK1 PE=4 SV=1	AK1	21.65	71.1	12	36	12	1.054	1.029	0.837	1.018	1.211	1.067	1.007	0.817	1.079	1.153	0.995	0.95476
A0A452E747	Armadillo-like helical domain-containing protein 4(predicted) OS=Capra hircus OX=9925 GN=ARMH4 PE=4 SV=1	ARMH4	81.475	1.2	1	1	1
A0A452E748	Sortilin(predicted) OS=Capra hircus OX=9925 GN=SORT1 PE=4 SV=1	SORT1	91.849	15.5	13	18	13	1.172	0.979	1.103	1.245	1.01	1.221	0.984	1.028	0.966	0.864	0.919	0.26176
A0A452E754	Lysosomal Pro-X carboxypeptidase(predicted) OS=Capra hircus OX=9925 GN=PRCP PE=4 SV=1	PRCP	56.313	27.4	12	20	12	1.163	1.384	0.959	1.091	1.447	0.827	0.806	0.743	0.853	0.883	0.68	0.00173889
A0A452E766	T-complex-associated testis-expressed protein 1(predicted) OS=Capra hircus OX=9925 GN=TCTE1 PE=4 SV=1	TCTE1	53.132	4.2	1	1	1	0.897	0.843	1.37	0.845	1.232	0.547	1.086	1.447	1.234	0.998	1.024	0.98526
A0A452E7A0	Plasminogen OS=Capra hircus OX=9925 GN=PLG PE=4 SV=1	PLG	91.19	34.9	22	30	22	0.875	1.047	1.672	0.885	1.041	0.782	1.017	1.332	0.979	0.799	0.889	0.50414
A0A452E7A4	Glutathione S-transferase theta-1 (Fragment)(predicted) OS=Capra hircus OX=9925 GN=LOC102178383 PE=4 SV=1	LOC102178383	27.3	28	7	9	7	0.982	1.399	0.947	1.006	1.501	0.947	0.784	0.8	1.122	0.761	0.756	0.057101
A0A452E7B0	Actin-related protein 2/3 complex subunit 2(predicted) OS=Capra hircus OX=9925 PE=4 SV=1	---	33.045	18	5	5	5	1.014	1.08	1.001	1.158	1.046	1.212	1.002	0.885	0.87	0.882	0.915	0.20046
A0A452E7B9	Alpha-actinin-4(predicted) OS=Capra hircus OX=9925 GN=ACTN4 PE=4 SV=1	ACTN4	104.91	23.2	19	22	19	1.07	1.189	1.109	1.135	1.24	0.817	0.825	0.969	0.96	0.938	0.785	0.00070167
A0A452E7C4	Calmodulin(predicted) OS=Capra hircus OX=9925 GN=CALM2 PE=4 SV=1	CALM2	16.336	60	10	47	10	1.685	1.212	1.089	1.513	1.306	0.878	0.666	0.642	0.685	0.674	0.521	0.000143095
A0A452E7C6	Acyl carrier protein, mitochondrial(predicted) OS=Capra hircus OX=9925 GN=NDUFAB1 PE=4 SV=1	NDUFAB1	17.343	15.4	2	3	2	1.487	1.149	0.811	1.224	1.159	1.181	0.808	0.636	0.821	1.111	0.782	0.129518
A0A452E7D5	Trafficking protein particle complex subunit 11(predicted) OS=Capra hircus OX=9925 GN=TRAPPC11 PE=4 SV=1	TRAPPC11	131.61	2.3	3	3	3
A0A452E7H3	HIST1H1E protein(predicted) OS=Capra hircus OX=9925 GN=LOC102181348 PE=4 SV=1	LOC102181348	21.485	9	3	4	3	0.873	1.674	1.256	1.146	1.218	0.69	0.715	0.885	0.782	1.204	0.693	0.035237
A0A452E7J2	E3 ubiquitin-protein ligase RNF123(predicted) OS=Capra hircus OX=9925 GN=RNF123 PE=4 SV=1	RNF123	147.53	4.8	6	6	6	0.953	0.918	0.716	0.957	0.939	1.198	1.281	1.124	1.126	1.251	1.334	0.00141741
A0A452E7K8	3'(2'),5'-bisphosphate nucleotidase 1(predicted) OS=Capra hircus OX=9925 GN=BPNT1 PE=4 SV=1	BPNT1	33.312	31.5	8	13	8	0.936	1.013	0.765	0.988	1.043	1.443	1.244	0.825	0.886	1.107	1.16	0.29204
A0A452E7L3	Alpha-mannosidase(predicted) OS=Capra hircus OX=9925 GN=MAN2A1 PE=4 SV=1	MAN2A1	127.67	2.7	3	3	3	1.567	1.659	0.811	0.972	1.217	0.787	0.678	0.999	0.831	0.933	0.679	0.046222
A0A452E7L5	C11H9ORF9 protein(predicted) OS=Capra hircus OX=9925 GN=SPACA9 PE=4 SV=1	SPACA9	20.397	48.9	7	15	7	1.252	1.093	1.122	1.073	1.13	0.945	0.969	0.839	0.883	0.998	0.817	0.00122364
A0A452E7M8	IGBP1 protein(predicted) OS=Capra hircus OX=9925 GN=IGBP1 PE=4 SV=1	IGBP1	37.628	16	6	8	6	0.856	0.871	0.77	0.916	0.788	1.451	1.354	0.984	1.12	1.325	1.484	0.00109825
A0A452E7P5	Protein XRP2(predicted) OS=Capra hircus OX=9925 GN=RP2 PE=4 SV=1	RP2	39.534	14.9	6	7	6	0.9	0.951	0.814	0.869	1.059	1.101	1.162	0.837	1.062	1.42	1.215	0.089944
A0A452E7Q2	Eukaryotic translation initiation factor 6(predicted) OS=Capra hircus OX=9925 GN=EIF6 PE=4 SV=1	EIF6	26.513	37.1	5	7	5	0.794	0.901	0.967	0.893	0.787	1.062	1.057	1.138	1.218	1.176	1.301	0.00059656
A0A452E7S0	cadherin-9 isoform X1(predicted) OS=Capra hircus OX=9925 GN=CDH9 PE=4 SV=1	CDH9	88.447	1.3	1	1	1	0.529	1.31	1.323	1.115	0.908	0.77	0.767	1.331	1.887	0.57	1.027	0.94752
A0A452E7S4	dnaJ homolog subfamily C member 13 isoform X4(predicted) OS=Capra hircus OX=9925 GN=DNAJC13 PE=4 SV=1	DNAJC13	252.78	8.3	16	21	16	0.886	0.884	0.941	0.881	0.834	1.028	1.383	1.065	1.129	1.198	1.311	0.00137893
A0A452E7T3	3-hydroxyisobutyrate dehydrogenase, mitochondrial(predicted) OS=Capra hircus OX=9925 GN=HIBADH PE=4 SV=1	HIBADH	35.156	22.3	5	7	5	1.346	1.056	0.913	1.004	0.968	1.259	0.948	0.891	0.821	1.253	0.978	0.80448
A0A452E809	Phospholipase A(2)(predicted) OS=Capra hircus OX=9925 GN=PLA2G10 PE=4 SV=1	PLA2G10	17.326	44.9	6	6	6	0.966	2.293	1.114	0.885	1.328	0.44	0.591	0.777	0.93	0.757	0.531	0.022078
A0A452E811	Rab GDP dissociation inhibitor (Fragment)(predicted) OS=Capra hircus OX=9925 GN=GDI1 PE=4 SV=1	GDI1	45.486	30.7	14	27	9	0.85	0.911	0.869	0.862	0.879	1.5	1.246	1.059	1.147	1.18	1.403	0.0050752
A0A452E813	Proteasome subunit beta(predicted) OS=Capra hircus OX=9925 GN=PSMB5 PE=4 SV=1	PSMB5	28.709	65	13	22	13	1.191	0.962	1.002	1.219	1.032	1.223	1.001	0.875	0.91	1.099	0.945	0.46354
A0A452E825	Cathepsin Z(predicted) OS=Capra hircus OX=9925 GN=CTSZ PE=4 SV=1	CTSZ	33.843	18.8	5	8	5	1.05	0.96	0.778	1.009	1.088	1.327	1.167	0.911	0.999	0.858	1.077	0.51454
A0A452E840	IDS(predicted) OS=Capra hircus OX=9925 GN=IDS PE=4 SV=1	IDS	61.048	3.3	2	2	2	0.878	1.09	1.007	0.822	0.972	1.159	1.128	0.959	1.264	1.139	1.185	0.034764
A0A452E876	Acrosin-binding protein(predicted) OS=Capra hircus OX=9925 GN=ACRBP PE=4 SV=1	ACRBP	58.736	33.1	19	63	19	1.66	1.629	0.798	1.225	1.813	0.501	0.561	0.462	0.632	0.739	0.406	0.00093929
A0A452E8A8	Immunoglobulin lambda variable 3-10(predicted) OS=Capra hircus OX=9925 PE=4 SV=1	---	14.709	7.2	1	2	1	1.333	1.1	2.48	1.19	1.268	0.546	0.569	0.559	0.669	0.766	0.422	0.00085603
A0A452E8C0	Elongation factor 1-delta(predicted) OS=Capra hircus OX=9925 GN=EEF1D PE=4 SV=1	EEF1D	29.336	33.7	7	7	6	1.773	0.839	0.8	2.352	0.89	0.726	0.726	0.755	0.799	0.654	0.55	0.091455
A0A452E8D3	Ig lambda chain V-I region BL2(predicted) OS=Capra hircus OX=9925 PE=4 SV=1	---	14.523	29.1	3	5	2	0.82	1.431	0.985	0.95	1.37	0.85	1.008	1	0.932	0.984	0.859	0.31536
A0A452E8D8	cAMP-dependent protein kinase type I-alpha regulatory subunit (Fragment)(predicted) OS=Capra hircus OX=9925 GN=PRKAR1A PE=4 SV=1	PRKAR1A	42.892	38.4	15	29	15	0.853	0.882	0.718	0.867	0.856	1.132	1.343	0.982	1.062	1.446	1.428	0.0026962
A0A452E8D9	Alpha-mannosidase(predicted) OS=Capra hircus OX=9925 PE=4 SV=1	---	111.99	9.1	7	19	1	0.945	1.19	1.06	1.226	0.997	0.622	1.233	0.963	1.287	0.897	0.923	0.4655
A0A452E8E3	Isobutyryl-CoA dehydrogenase, mitochondrial(predicted) OS=Capra hircus OX=9925 GN=ACAD8 PE=4 SV=1	ACAD8	43.055	13.4	5	5	5	0.823	0.937	1.285	0.855	0.971	0.925	1.112	1.206	1.102	1.247	1.148	0.159518
A0A452E8H3	ATOX1(predicted) OS=Capra hircus OX=9925 PE=4 SV=1	---	7.4786	11.6	1	4	1	0.894	0.786	0.667	1.038	0.919	1.745	1.399	0.928	1.101	0.939	1.42	0.04946
A0A452E8K2	Uridine diphosphate glucose pyrophosphatase(predicted) OS=Capra hircus OX=9925 GN=NUDT14 PE=4 SV=1	NUDT14	23.895	9.5	2	2	2	0.887	1.02	0.634	0.94	0.98	1.522	1.354	0.872	1.042	1.143	1.33	0.062965
A0A452E8K7	Protein kinase-like protein SgK196(predicted) OS=Capra hircus OX=9925 GN=POMK PE=4 SV=1	POMK	38.801	4.3	2	2	2	0.868	1.113	1.844	0.76	1.087	0.523	0.773	1.359	1.48	0.729	0.858	0.4856
A0A452E8M7	Isocitrate dehydrogenase [NAD] subunit, mitochondrial(predicted) OS=Capra hircus OX=9925 GN=IDH3B PE=4 SV=1	IDH3B	42.531	26.8	9	10	9	1.011	0.973	1.143	0.825	0.825	1.312	1.027	1.026	0.978	1.217	1.164	0.107784
A0A452E8N9	Glycerol-3-phosphate dehydrogenase [NAD(+)](predicted) OS=Capra hircus OX=9925 GN=GPD1L PE=4 SV=1	GPD1L	37.723	13.6	5	8	0
A0A452E8P0	Testis-specific serine/threonine-protein kinase 4(predicted) OS=Capra hircus OX=9925 GN=TSSK4 PE=4 SV=1	TSSK4	37.214	7.7	2	2	2	1.765	0.769	0.661	1.767	1.011	1.003	0.797	0.638	0.852	1.103	0.735	0.31698
A0A452E8Q0	Galectin(predicted) OS=Capra hircus OX=9925 GN=LGALS3 PE=4 SV=1	LGALS3	24.823	20.9	4	4	4	0.749	0.9	1.29	0.871	1.076	1.293	0.847	1.043	1.144	1.238	1.139	0.28644
A0A452E8Q5	Thioredoxin domain containing 17(predicted) OS=Capra hircus OX=9925 GN=TXNDC17 PE=4 SV=1	TXNDC17	13.883	18.7	2	3	2	0.901	0.844	0.575	0.823	0.852	2.055	1.195	0.83	1.035	1.283	1.602	0.033782
A0A452E8S2	Glycerophosphodiester phosphodiesterase domain containing 4(predicted) OS=Capra hircus OX=9925 GN=LOC102183767 PE=4 SV=1	LOC102183767	80.944	9.6	7	7	4	1.287	0.639	1.742	1.273	0.638	1.142	0.778	1.259	0.857	0.924	0.889	0.81238
A0A452E8V1	Protein prune-like protein(predicted) OS=Capra hircus OX=9925 GN=PRUNE1 PE=4 SV=1	PRUNE1	49.936	7.9	2	4	2	0.914	0.902	1.447	0.869	1.217	0.742	1.137	1.211	1.075	0.966	0.959	0.80018
A0A452E8V4	Alpha-methylacyl-CoA racemase(predicted) OS=Capra hircus OX=9925 GN=AMACR PE=4 SV=1	AMACR	41.865	6	2	2	2	1.249	1.164	1.296	1.099	0.939	0.741	0.902	1.218	0.918	0.972	0.827	0.078818
A0A452E8W4	Glycerol-3-phosphate dehydrogenase [NAD(+)](predicted) OS=Capra hircus OX=9925 PE=4 SV=1	---	38.266	34.8	11	22	7	1.449	1.564	0.925	1.401	1.329	0.589	0.877	0.721	0.821	0.735	0.561	0.00104028
A0A452E8W7	Annexin(predicted) OS=Capra hircus OX=9925 GN=ANXA3 PE=4 SV=1	ANXA3	35.506	10	3	3	2	0.925	1.027	1.266	1.215	1.063	1.109	0.745	1.08	1.027	1.017	0.906	0.2981
A0A452E8X2	ADP-ribose glycohydrolase ARH3(predicted) OS=Capra hircus OX=9925 GN=ADPRHL2 PE=4 SV=1	ADPRHL2	39.394	9.5	3	3	3	0.885	1.022	0.893	0.943	0.96	1.276	1.172	0.959	0.993	1.221	1.195	0.02464
A0A452E8X3	Rho GDP-dissociation inhibitor 2(predicted) OS=Capra hircus OX=9925 GN=ARHGDIB PE=4 SV=1	ARHGDIB	22.806	58	10	24	10	0.908	1.006	0.778	1.018	1.024	1.527	1.217	0.882	0.963	0.983	1.177	0.22416
A0A452E8Y5	AKR7A2 protein(predicted) OS=Capra hircus OX=9925 PE=4 SV=1	---	32.404	38.4	9	10	2	0.719	1.368	1.328	0.755	1.086	0.98	1.002	1.127	1.027	1.085	0.993	0.849
A0A452E8Z1	Family with sequence similarity 198 member A(predicted) OS=Capra hircus OX=9925 GN=FAM198A PE=4 SV=1	FAM198A	61	46.9	21	50	21	0.923	0.953	1.199	0.892	0.818	0.642	1.283	1.473	1.163	0.943	1.15	0.50804
A0A452E905	Regucalcin(predicted) OS=Capra hircus OX=9925 GN=RGN PE=4 SV=1	RGN	33.609	10	2	3	2	0.966	0.823	0.777	0.841	1.039	1.643	0.864	1.027	0.925	0.911	1.208	0.23826
A0A452E954	unconventional myosin-XVIIIa isoform X5(predicted) OS=Capra hircus OX=9925 GN=MYO18A PE=4 SV=1	MYO18A	232.16	0.3	1	1	1	0.515	0.51	0.788	0.285	0.364	0.61	0.591	1.073	2.246	3.27	3.164	0.034799
A0A452E959	LRRC23(predicted) OS=Capra hircus OX=9925 GN=LRRC23 PE=4 SV=1	LRRC23	39.619	5	2	2	2	1.05	1.091	0.989	0.957	1.038	0.975	1.142	0.93	0.86	1.377	1.031	0.85302
A0A452E968	T-complex protein 1 subunit gamma (Fragment)(predicted) OS=Capra hircus OX=9925 GN=CCT3 PE=4 SV=1	CCT3	60.585	64.2	36	108	36	0.787	0.796	0.656	0.844	0.776	1.755	1.206	0.92	1.112	1.342	1.642	0.0032593
A0A452E972	60S ribosomal protein L24(predicted) OS=Capra hircus OX=9925 GN=RPL24 PE=4 SV=1	RPL24	14.225	6.7	1	2	1
A0A452E984	Seminal vesicles 22 kDa protein(predicted) OS=Capra hircus OX=9925 PE=4 SV=1	---	14.604	38.2	11	165	1	1.162	1.106	1.032	1.122	0.928	0.718	0.877	1.316	1.085	0.934	0.921	0.38966
A0A452E9B2	translationally-controlled tumor protein(predicted) OS=Capra hircus OX=9925 GN=TPT1 PE=4 SV=1	TPT1	19.563	15.7	3	4	0
A0A452E9C1	Eukaryotic translation initiation factor 3 subunit H (Fragment)(predicted) OS=Capra hircus OX=9925 GN=EIF3H PE=4 SV=1	EIF3H	39.933	19.9	5	6	5	1.006	1.034	0.836	1.373	0.831	0.775	0.94	0.866	1.345	1.368	1.042	0.83752
A0A452E9E9	Canopy FGF signaling regulator 2(predicted) OS=Capra hircus OX=9925 GN=CNPY2 PE=4 SV=1	CNPY2	20.638	5.5	1	1	1	1.132	0.932	1.34	0.963	1.144	1.024	0.817	1.076	1.058	0.984	0.9	0.25232
A0A452E9K8	Ubiquitin carboxyl-terminal hydrolase MINDY-3(predicted) OS=Capra hircus OX=9925 GN=MINDY3 PE=4 SV=1	MINDY3	49.678	12.8	6	7	6	0.779	0.96	0.856	0.775	0.98	1.254	1.252	0.973	1.192	1.148	1.338	0.0027174
A0A452E9L8	Immunoglobulin light chain, lambda gene cluster(predicted) OS=Capra hircus OX=9925 PE=4 SV=1	---	14.353	31.2	2	3	2	1.079	1.318	1.778	1.074	1.39	0.759	0.764	0.847	0.756	0.728	0.581	0.0054792
A0A452E9M4	Triacylglycerol lipase(predicted) OS=Capra hircus OX=9925 GN=PNLIPRP2 PE=4 SV=1	PNLIPRP2	52.124	46.1	20	106	20	0.958	2.155	1.04	0.748	1.105	0.436	0.734	1.036	1.129	0.884	0.702	0.20624
A0A452E9Q6	Meiosis-specific nuclear structural protein 1 (Fragment)(predicted) OS=Capra hircus OX=9925 GN=MNS1 PE=4 SV=1	MNS1	60.555	1.8	1	1	1
A0A452E9Q9	COP9 signalosome complex subunit 3(predicted) OS=Capra hircus OX=9925 GN=COPS3 PE=4 SV=1	COPS3	47.799	9.9	4	5	4	0.935	0.911	1.04	1.125	0.949	0.977	1.06	1.229	1.012	1.045	1.073	0.2392
A0A452E9S1	serine/threonine-protein phosphatase 2A 65 kDa regulatory subunit A alpha isoform isoform X1(predicted) OS=Capra hircus OX=9925 PE=4 SV=1	---	65.539	9.2	4	4	4	1.038	0.988	0.891	0.964	0.931	1.118	1.227	1.058	1.053	0.909	1.115	0.092864
A0A452E9T3	Programmed cell death 6(predicted) OS=Capra hircus OX=9925 PE=4 SV=1	---	19.512	4.7	1	1	1	1.125	1.031	1.336	1.206	1.038	1.141	0.89	0.907	0.971	0.82	0.824	0.029882
A0A452E9T4	Guanine nucleotide-binding protein G(s) subunit alpha isoforms short(predicted) OS=Capra hircus OX=9925 GN=LOC102188874 PE=4 SV=1	LOC102188874	45.708	15.5	6	7	5	0.9	0.99	0.969	1.098	1.309	1.118	0.897	1.037	1.202	0.978	0.994	0.97198
A0A452E9X3	ET-1(predicted) OS=Capra hircus OX=9925 GN=EDN1 PE=4 SV=1	EDN1	22.993	5	1	1	1	0.841	1.224	1.186	0.904	1.189	0.546	1.66	1.487	0.833	0.654	0.969	0.63384
A0A452E9Y1	SQRDL protein(predicted) OS=Capra hircus OX=9925 GN=SQOR PE=4 SV=1	SQOR	49.902	20.2	8	8	8	1.164	0.996	0.99	1.073	0.918	1.008	1.036	0.963	0.957	1.206	1.006	0.93026
A0A452EA05	Anterior gradient 2, protein disulphide isomerase family member(predicted) OS=Capra hircus OX=9925 GN=AGR2 PE=4 SV=1	AGR2	19.909	36	7	8	7	0.757	1.061	0.903	0.782	0.934	0.831	1.009	1.268	0.995	1.459	1.254	0.103765
A0A452EA31	Dynein light chain roadblock-type 2 OS=Capra hircus OX=9925 GN=DYNLRB2 PE=4 SV=1	DYNLRB2	10.903	50.5	3	3	3	1.593	1.48	1.364	1.55	1.573	0.604	0.472	0.583	0.661	0.644	0.392	2.8261e-07
A0A452EA46	BAG family molecular chaperone regulator 5(predicted) OS=Capra hircus OX=9925 GN=BAG5 PE=4 SV=1	BAG5	51.003	8.9	3	3	3	0.824	0.904	1.014	0.95	0.896	1.146	1.167	1.222	1.149	1.185	1.279	0.000135622
A0A452EA58	Mannose-6-phosphate isomerase(predicted) OS=Capra hircus OX=9925 GN=MPI PE=4 SV=1	MPI	46.311	43.7	13	34	13	0.961	0.981	0.806	0.965	0.982	1.375	1.064	0.927	0.99	1.157	1.174	0.084545
A0A452EA99	Calcium/calmodulin-dependent protein kinase type IV (Fragment)(predicted) OS=Capra hircus OX=9925 GN=CAMK4 PE=4 SV=1	CAMK4	50.059	14.7	7	7	7	1.445	1.271	0.99	1.35	1.345	0.775	0.724	0.786	0.754	0.785	0.597	0.0016574
A0A452EAA3	ADP ribosylation factor like GTPase 8B(predicted) OS=Capra hircus OX=9925 GN=ARL8B PE=4 SV=1	ARL8B	17.08	29.5	5	8	4	0.942	0.859	0.821	0.847	0.792	1.139	1.146	0.9	1.307	1.405	1.384	0.0047173
A0A452EAB4	Purine nucleoside phosphorylase(predicted) OS=Capra hircus OX=9925 GN=PNP PE=4 SV=1	PNP	32.137	3.1	1	1	1	1.194	0.939	1.353	1.314	1.054	1.282	0.68	0.779	0.905	0.949	0.785	0.0778
A0A452EAB5	Seminal vesicles 14 kDa protein(predicted) OS=Capra hircus OX=9925 GN=LOC102182822 PE=4 SV=1	LOC102182822	14.723	76	22	420	22	1.01	1.006	1.162	0.891	0.867	0.729	0.871	1.533	1.1	1.204	1.101	0.63212
A0A452EAB6	Proteasome subunit alpha type(predicted) OS=Capra hircus OX=9925 GN=PSMA4 PE=4 SV=1	PSMA4	29.483	66.3	16	35	16	1.169	1.062	0.764	1.166	0.964	1.45	1.052	0.787	0.924	1.035	1.024	0.91052
A0A452EAG5	Brefeldin A-inhibited guanine nucleotide-exchange protein 1(predicted) OS=Capra hircus OX=9925 GN=ARFGEF1 PE=4 SV=1	ARFGEF1	208.77	10.1	17	21	10	0.819	0.657	0.687	0.876	0.661	1.355	1.804	1.269	1.042	1.359	1.846	0.00046063
A0A452EAH5	Alkaline phosphatase, tissue-nonspecific isozyme(predicted) OS=Capra hircus OX=9925 GN=ALPL PE=4 SV=1	ALPL	57.176	31.1	13	26	12	0.958	0.899	0.822	0.995	1.031	1.187	1.023	1.119	1.069	1.223	1.195	0.0086152
A0A452EAI1	Izumo sperm-egg fusion protein 4 (Fragment)(predicted) OS=Capra hircus OX=9925 GN=IZUMO4 PE=4 SV=1	IZUMO4	24.079	27.8	6	27	6	1.921	1.387	0.904	1.61	1.326	0.584	0.604	0.684	0.68	0.591	0.44	0.0036238
A0A452EAJ1	Cathelin-related peptide SC5(predicted) OS=Capra hircus OX=9925 GN=LOC102171106 PE=4 SV=1	LOC102171106	17.593	15	3	3	1	2.434	0.488	0.573	4.49	0.523	0.32	0.288	0.389	0.456	0.425	0.221	0.081164
A0A452EAJ9	Aldehyde dehydrogenase 6 family member A1(predicted) OS=Capra hircus OX=9925 GN=ALDH6A1 PE=4 SV=1	ALDH6A1	57.889	6.7	3	3	3	1.263	1.116	0.914	1.058	1.071	0.79	0.92	0.753	0.992	1.272	0.872	0.197979
A0A452EAM4	translin-associated protein X isoform X1(predicted) OS=Capra hircus OX=9925 GN=TSNAX PE=4 SV=1	TSNAX	33.021	23.1	6	7	6	1.002	0.965	0.787	1.041	0.987	1.551	1.225	0.893	1.014	1.039	1.197	0.160904
A0A452EAR2	Epsin 1(predicted) OS=Capra hircus OX=9925 GN=EPN1 PE=4 SV=1	EPN1	60.103	4.5	2	2	1
A0A452EAS1	guanine nucleotide-binding protein subunit alpha-11(predicted) OS=Capra hircus OX=9925 GN=GNA11 PE=4 SV=1	GNA11	42.07	7.5	3	3	3
A0A452EAT2	Angiotensin-converting enzyme(predicted) OS=Capra hircus OX=9925 GN=ACE PE=4 SV=1	ACE	150.58	27.1	38	192	38	1.414	0.939	0.991	1.447	1.081	0.902	0.871	0.79	0.868	0.986	0.752	0.023384
A0A452EAU9	Endoribonuclease LACTB2(predicted) OS=Capra hircus OX=9925 GN=LACTB2 PE=4 SV=1	LACTB2	32.742	9.4	2	2	2	1.02	0.938	1.104	1.065	0.983	1.148	1.178	1.142	0.931	0.962	1.049	0.45696
A0A452EAV4	Transmembrane protease serine 7(predicted) OS=Capra hircus OX=9925 GN=TMPRSS7 PE=4 SV=1	TMPRSS7	92.979	1	1	1	1	1.275	1.401	1.254	1.324	1.487	0.712	0.75	0.608	0.725	0.876	0.545	1.76094e-05
A0A452EAX0	N-acetylglucosamine-1-phosphotransferase subunit gamma(predicted) OS=Capra hircus OX=9925 GN=GNPTG PE=4 SV=1	GNPTG	33.425	6.6	1	1	1	0.83	0.916	1.148	0.97	1.132	0.878	1.071	1.307	1.12	1.103	1.097	0.33124
A0A452EAX9	Casein kinase I isoform gamma-2(predicted) OS=Capra hircus OX=9925 GN=CSNK1G2 PE=4 SV=1	CSNK1G2	47.268	30.7	13	20	13	0.834	0.883	0.929	0.816	0.997	1.292	1.331	0.94	1.048	1.314	1.329	0.0082416
A0A452EAZ6	Protein CutA(predicted) OS=Capra hircus OX=9925 GN=CUTA PE=4 SV=1	CUTA	18.917	31.1	3	12	3	1.016	1.065	0.948	1.059	1.051	1.129	1.01	1.029	1.006	1.026	1.012	0.70672
A0A452EB00	Eukaryotic translation initiation factor 3 subunit M(predicted) OS=Capra hircus OX=9925 GN=EIF3M PE=4 SV=1	EIF3M	42.488	2.1	1	1	1	1.164	0.75	0.975	1.449	0.782	0.899	0.977	1.188	1.211	1.057	1.041	0.64438
A0A452EB03	Succinyl-CoA:3-ketoacid-coenzyme A transferase(predicted) OS=Capra hircus OX=9925 GN=OXCT1 PE=4 SV=1	OXCT1	55.915	30.9	13	17	8	1.156	1.265	0.945	0.913	1.179	1.015	0.821	0.839	1.022	1.126	0.884	0.20454
A0A452EB05	Pyruvate dehydrogenase E1 component subunit beta, mitochondrial(predicted) OS=Capra hircus OX=9925 GN=PDHB PE=4 SV=1	PDHB	39.168	31.8	8	12	8	1.058	0.851	0.809	0.729	0.735	0.898	1.369	0.787	0.868	2.064	1.431	0.160683
A0A452EB21	Solute carrier family 2 member 3(predicted) OS=Capra hircus OX=9925 GN=SLC2A3 PE=4 SV=1	SLC2A3	54.149	13.6	8	28	8	1.4	1.369	1.14	1.277	1.357	0.7	0.692	0.636	0.811	0.867	0.566	2.4509e-05
A0A452EB31	Wnt inhibitory factor 1(predicted) OS=Capra hircus OX=9925 GN=WIF1 PE=4 SV=1	WIF1	41.509	9.2	3	4	3	1.832	1.124	1.069	2.019	0.948	0.535	0.674	0.758	0.722	0.755	0.493	0.0038042
A0A452EB32	IQ motif containing F1(predicted) OS=Capra hircus OX=9925 GN=IQCF1 PE=4 SV=1	IQCF1	23.483	10.8	2	3	2	1.141	1.263	1.44	1.178	1.616	0.812	0.812	0.804	0.699	0.868	0.602	0.000141207
A0A452EB57	Proteasome subunit beta(predicted) OS=Capra hircus OX=9925 GN=PSMB3 PE=4 SV=1	PSMB3	22.993	43.4	10	18	10	1.146	1.045	0.835	1.163	0.994	1.319	1.038	0.878	0.913	0.962	0.986	0.8515
A0A452EB87	serine/threonine-protein kinase WNK1 isoform X28(predicted) OS=Capra hircus OX=9925 GN=WNK1 PE=4 SV=1	WNK1	218.87	4	8	8	8	0.864	0.824	0.749	0.905	0.689	1.471	1.32	1.118	1.086	1.416	1.59	0.00038083
A0A452EB94	receptor-type tyrosine-protein phosphatase kappa isoform X13(predicted) OS=Capra hircus OX=9925 GN=PTPRK PE=4 SV=1	PTPRK	97.323	3.7	3	3	3	0.84	1.116	1.13	0.818	1.045	0.92	1.106	1.372	1.215	0.881	1.11	0.38386
A0A452EB98	LOC511106 protein(predicted) OS=Capra hircus OX=9925 GN=LOC108633803 PE=4 SV=1	LOC108633803	44.24	6.9	3	3	1	1.014	1.091	1.01	1.567	1.179	0.861	0.765	0.89	0.784	1.258	0.778	0.067961
A0A452EBA0	Eukaryotic translation initiation factor 3 subunit D(predicted) OS=Capra hircus OX=9925 GN=EIF3D PE=4 SV=1	EIF3D	63.93	5.7	3	3	3	1.111	1.012	1.246	1.192	1.007	0.704	0.976	1.198	0.99	1.04	0.881	0.196344
A0A452EBC1	Complement component C8 beta chain(predicted) OS=Capra hircus OX=9925 GN=C8B PE=4 SV=1	C8B	59.28	10.1	5	5	5	0.817	1.011	1.926	0.831	0.864	0.681	1.245	1.177	0.996	0.948	0.926	0.8471
A0A452EBC8	Thrombospondin type 1 domain containing 4(predicted) OS=Capra hircus OX=9925 GN=THSD4 PE=4 SV=1	THSD4	73.311	4.4	3	4	3	1.389	1.25	0.99	1.425	1.272	0.515	1.074	1.063	0.78	0.709	0.655	0.0175604
A0A452EBG6	multifunctional protein ADE2 isoform X1(predicted) OS=Capra hircus OX=9925 GN=LOC102182773 PE=4 SV=1	LOC102182773	47.266	25.2	10	11	10	0.972	0.884	0.978	1.105	0.864	1.289	1.076	1.097	0.899	1.075	1.132	0.130395
A0A452EBH2	Hydroxysteroid (17-beta) dehydrogenase 4(predicted) OS=Capra hircus OX=9925 GN=HSD17B4 PE=4 SV=1	HSD17B4	79.49	6.1	4	6	4	1.266	0.812	0.898	1.536	0.91	1.25	0.932	0.989	1.005	0.866	0.93	0.71912
A0A452EBH4	ATP synthase F(0) complex subunit B1, mitochondrial(predicted) OS=Capra hircus OX=9925 GN=ATP5PB PE=4 SV=1	ATP5PB	28.806	15.2	4	4	4	1.204	0.941	1.329	1.197	0.726	0.808	1.255	0.994	0.86	1.031	0.917	0.58422
A0A452EBJ3	40S ribosomal protein S3(predicted) OS=Capra hircus OX=9925 GN=RPS3 PE=4 SV=1	RPS3	26.688	36.6	11	12	11	1.539	0.858	0.845	1.94	0.852	1.106	0.743	0.786	0.854	0.714	0.697	0.149178
A0A452EBP2	Protein S100(predicted) OS=Capra hircus OX=9925 GN=S100A2 PE=4 SV=1	S100A2	11.024	19.4	2	2	2	0.859	1.531	1.589	1	1.555	0.851	0.494	0.706	0.707	1.15	0.598	0.025136
A0A452EBR8	glycerophosphodiester phosphodiesterase domain-containing protein 4(predicted) OS=Capra hircus OX=9925 GN=LOC102183296 PE=4 SV=1	LOC102183296	86.206	13.1	8	9	5	1.146	0.965	1.243	1.114	1.151	0.831	1	1.007	0.956	0.984	0.85	0.0182646
A0A452EBZ8	Trafficking protein particle complex subunit 9 (Fragment)(predicted) OS=Capra hircus OX=9925 GN=TRAPPC9 PE=4 SV=1	TRAPPC9	111.85	1	1	1	1	1.361	1.245	1.686	1.131	1.348	0.58	0.756	0.823	0.749	0.791	0.546	0.00015749
A0A452EC09	Ubiquitinyl hydrolase 1(predicted) OS=Capra hircus OX=9925 GN=USP5 PE=4 SV=1	USP5	93.324	23.7	15	20	15	0.915	0.751	0.739	0.932	0.763	1.712	1.474	1.009	0.931	1.103	1.519	0.0141818
A0A452EC20	Cache domain containing 1(predicted) OS=Capra hircus OX=9925 GN=CACHD1 PE=4 SV=1	CACHD1	140.3	0.8	1	1	1
A0A452EC41	eukaryotic initiation factor 4A-II isoform X3(predicted) OS=Capra hircus OX=9925 GN=EIF4A2 PE=4 SV=1	EIF4A2	41.377	20.9	7	7	7	1.16	0.886	0.868	1.54	0.904	1.999	0.79	0.778	0.808	0.622	0.933	0.56184
A0A452EC49	probable E3 ubiquitin-protein ligase HERC4 isoform X1(predicted) OS=Capra hircus OX=9925 GN=HERC4 PE=4 SV=1	HERC4	118.59	13.9	11	13	11	0.847	0.838	0.926	0.898	0.881	1.175	1.347	1.018	1.138	1.117	1.32	0.00051681
A0A452EC53	Succinyl-CoA:3-ketoacid-coenzyme A transferase(predicted) OS=Capra hircus OX=9925 GN=LOC108633171 PE=4 SV=1	LOC108633171	54.179	43.6	19	45	18	1.39	0.854	0.872	1.05	0.793	1.038	1.02	0.758	0.766	1.554	1.036	0.90406
A0A452EC76	Zonadhesin (gene/pseudogene)(predicted) OS=Capra hircus OX=9925 GN=ZAN PE=4 SV=1	ZAN	272.75	18	43	71	43	1.726	1.091	1.771	1.82	1.128	0.424	0.492	0.606	0.512	0.585	0.348	4.4174e-05
A0A452EC90	G-protein coupled receptor 64 isoform X9(predicted) OS=Capra hircus OX=9925 GN=ADGRG2 PE=4 SV=1	ADGRG2	102.9	1.3	1	1	1	0.82	0.968	1.041	0.809	1.127	0.859	1.366	1.205	0.985	1.26	1.191	0.154056
A0A452EC92	Signal recognition particle receptor subunit alpha(predicted) OS=Capra hircus OX=9925 GN=SRPRA PE=4 SV=1	SRPRA	69.821	22.1	14	20	14	0.98	1.015	1.008	1.024	0.925	0.945	1.113	1.463	1.06	0.84	1.095	0.4831
A0A452ECA7	Family with sequence similarity 234 member B(predicted) OS=Capra hircus OX=9925 GN=FAM234B PE=4 SV=1	FAM234B	66.599	3.4	2	2	2	1.072	0.84	1.121	1.038	0.858	1.039	1.078	1.253	1.078	1.098	1.125	0.107323
A0A452ECC5	60S ribosomal protein L4 (Fragment)(predicted) OS=Capra hircus OX=9925 GN=RPL4 PE=4 SV=1	RPL4	48.479	4.9	2	2	2	1.485	0.875	0.887	1.946	0.957	0.967	0.792	0.789	0.913	0.81	0.694	0.131784
A0A452ECC6	Epididymis secretory sperm binding protein(predicted) OS=Capra hircus OX=9925 GN=PHB PE=4 SV=1	PHB	29.79	4	1	1	1
A0A452ECE5	Endoplasmic reticulum protein 29(predicted) OS=Capra hircus OX=9925 GN=ERP29 PE=4 SV=1	ERP29	28.876	23.2	6	10	6	0.835	0.745	0.585	0.98	0.597	1.284	0.662	0.697	0.68	2.945	1.675	0.29342
A0A452ECF5	Protein phosphatase 1 regulatory subunit 7(predicted) OS=Capra hircus OX=9925 GN=PPP1R7 PE=4 SV=1	PPP1R7	40.469	39.8	12	20	12	0.963	0.892	0.87	1	0.87	1.384	1.178	1.069	1.002	1.174	1.264	0.0057751
A0A452ECF9	Radial spoke head protein 6-like protein A(predicted) OS=Capra hircus OX=9925 GN=RSPH6A PE=4 SV=1	RSPH6A	80.335	8	4	4	4	1.482	1.428	1.019	1.245	1.125	0.627	0.836	0.864	0.87	0.907	0.652	0.0022802
A0A452ECI7	Eukaryotic translation initiation factor 4B (Fragment)(predicted) OS=Capra hircus OX=9925 GN=EIF4B PE=4 SV=1	EIF4B	69.375	2.8	1	1	1	0.98	1.49	0.899	1.212	1.742	1.278	0.853	0.45	0.931	0.554	0.643	0.065456
A0A452ECK1	Toll-interacting protein(predicted) OS=Capra hircus OX=9925 GN=TOLLIP PE=4 SV=1	TOLLIP	30.118	20.9	5	7	5	0.996	0.973	0.777	1.024	0.871	1.055	1.154	1.047	0.987	1.181	1.169	0.031383
A0A452ECN4	Proteasome subunit alpha type(predicted) OS=Capra hircus OX=9925 GN=PSMA2 PE=4 SV=1	PSMA2	25.898	44	13	31	13	1.117	0.984	0.889	1.159	0.988	1.23	1.011	0.79	0.931	1.115	0.988	0.84144
A0A452ECP5	Maestro heat like repeat family member 2B(predicted) OS=Capra hircus OX=9925 PE=4 SV=1	---	62.72	23.8	16	22	16	0.596	0.703	0.794	0.606	0.586	1.175	1.606	1.229	1.189	1.593	2.068	5.5682e-05
A0A452ECU4	Complement C1s subcomponent(predicted) OS=Capra hircus OX=9925 GN=C1S PE=4 SV=1	C1S	77.852	3	2	2	2	1.305	0.98	1.152	1.719	0.929	1.641	1.079	0.699	0.47	0.496	0.721	0.148219
A0A452ECV2	40S ribosomal protein S14(predicted) OS=Capra hircus OX=9925 GN=RPS14 PE=4 SV=1	RPS14	16.273	21.9	2	2	2	1.337	0.857	1.406	1.844	0.957	0.906	0.631	1.042	0.845	0.677	0.641	0.034281
A0A452ECY5	Bis(5'-nucleosyl)-tetraphosphatase [asymmetrical](predicted) OS=Capra hircus OX=9925 GN=NUDT2 PE=4 SV=1	NUDT2	16.841	16.3	2	3	2	0.936	0.731	0.828	0.828	0.869	1.24	1.511	1.051	1.102	1.307	1.482	0.00091998
A0A452ED07	Aspartyl aminopeptidase (Fragment)(predicted) OS=Capra hircus OX=9925 GN=DNPEP PE=4 SV=1	DNPEP	52.284	53.7	19	47	19	1.568	0.859	0.966	1.627	0.879	1.098	0.928	0.8	0.843	0.808	0.759	0.154241
A0A452ED08	LDL receptor related protein associated protein 1(predicted) OS=Capra hircus OX=9925 GN=LRPAP1 PE=4 SV=1	LRPAP1	35.309	37.3	11	14	11	0.873	1.307	0.962	0.841	1.084	0.724	1.079	1.514	1.066	0.997	1.062	0.75644
A0A452ED29	Polymeric immunoglobulin receptor OS=Capra hircus OX=9925 GN=PIGR PE=4 SV=1	PIGR	81.477	32.7	26	65	26	0.748	1.614	0.897	1.014	2.003	1.234	1.006	0.773	0.587	0.529	0.658	0.139904
A0A452ED36	B-cell receptor-associated protein 31(predicted) OS=Capra hircus OX=9925 GN=BCAP31 PE=4 SV=1	BCAP31	29.125	2.8	1	1	1
A0A452ED39	Es1 protein(predicted) OS=Capra hircus OX=9925 GN=GATD3A PE=4 SV=1	GATD3A	28.655	41.2	8	14	8	1.193	1.059	0.842	0.921	1.051	1.047	0.956	0.76	1.073	1.322	1.018	0.93316
A0A452ED55	C9ORF59 protein(predicted) OS=Capra hircus OX=9925 GN=FAM78A PE=4 SV=1	FAM78A	31.91	3.2	1	1	1
A0A452ED69	Tripeptidyl-peptidase 2(predicted) OS=Capra hircus OX=9925 GN=TPP2 PE=4 SV=1	TPP2	138.28	35.3	41	62	41	0.995	0.992	0.724	1.119	1.014	1.351	1.204	0.852	1.029	1.082	1.139	0.26302
A0A452ED84	Hepatitis A virus cellular receptor 1 (Fragment)(predicted) OS=Capra hircus OX=9925 PE=4 SV=1	---	14.905	20.3	2	2	2	1.701	0.497	0.721	1.863	0.512	0.561	1.707	1.741	0.637	0.606	0.992	0.95942
A0A452EDA9	Alpha-2,3-sialyltransferase(predicted) OS=Capra hircus OX=9925 GN=ST3GAL4 PE=4 SV=1	ST3GAL4	38.679	18.2	5	6	5	1.146	0.94	1.007	1.188	0.907	1.102	0.918	0.983	1.198	1.044	1.011	0.86414
A0A452EDD3	LIX1L protein(predicted) OS=Capra hircus OX=9925 GN=LIX1L PE=4 SV=1	LIX1L	36.562	2.7	1	1	1
A0A452EDF2	Serine protease HTRA2, mitochondrial(predicted) OS=Capra hircus OX=9925 GN=HTRA2 PE=4 SV=1	HTRA2	49.054	12	4	5	4	1.18	1.019	1.05	1.184	1.118	0.764	0.929	1.023	0.979	1.077	0.86	0.046817
A0A452EDF9	Cation-transporting ATPase(predicted) OS=Capra hircus OX=9925 GN=ATP13A4 PE=4 SV=1	ATP13A4	133.74	6.1	6	6	6	0.927	1.123	1.039	1.036	1.256	0.845	0.895	1.209	1.357	0.883	0.964	0.65576
A0A452EDG3	E3 SUMO-protein ligase RanBP2(predicted) OS=Capra hircus OX=9925 GN=RANBP2 PE=4 SV=1	RANBP2	334.84	0.3	1	1	1	0.889	0.776	0.537	0.826	0.665	1.986	1.359	0.849	1.171	1.324	1.811	0.0081003
A0A452EDH0	Folate receptor 2 (Fetal)(predicted) OS=Capra hircus OX=9925 GN=FOLR2 PE=4 SV=1	FOLR2	29.282	11.1	2	4	1	1.016	0.942	1.214	1.332	1.148	0.908	0.989	1.009	0.821	1.071	0.849	0.071558
A0A452EDH8	Dmx like 2(predicted) OS=Capra hircus OX=9925 GN=DMXL2 PE=4 SV=1	DMXL2	340.28	10.4	28	29	27	0.768	0.747	0.835	0.748	0.75	0.977	1.71	1.248	1.309	1.076	1.642	0.0081752
A0A452EDI0	Lysosomal-associated membrane protein 2(predicted) OS=Capra hircus OX=9925 GN=LAMP2 PE=4 SV=1	LAMP2	54.154	10.1	6	12	6	1.276	1.277	1.291	1.357	1.234	0.812	0.73	0.877	0.778	0.736	0.611	4.904e-07
A0A452EDI7	Thiamin pyrophosphokinase 1(predicted) OS=Capra hircus OX=9925 GN=TPK1 PE=4 SV=1	TPK1	27.217	7.1	1	1	1	0.938	1.081	0.884	0.981	1.043	1.271	0.816	1.578	0.635	1.305	1.138	0.67274
A0A452EDL2	cullin-2(predicted) OS=Capra hircus OX=9925 GN=CUL2 PE=4 SV=1	CUL2	86.984	9.4	7	8	7	0.858	0.877	0.807	0.961	0.841	1.302	1.293	0.993	1.124	1.212	1.364	0.00075662
A0A452EDL3	Protein YIPF(predicted) OS=Capra hircus OX=9925 GN=YIPF3 PE=4 SV=1	YIPF3	37.933	2.9	1	1	1	0.632	1.286	1.338	0.76	1.264	0.865	0.918	1.479	1.024	0.968	0.995	0.90852
A0A452EDR2	Spermatogenesis and centriole associated 1(predicted) OS=Capra hircus OX=9925 GN=SPATC1 PE=4 SV=1	SPATC1	50.185	15.5	6	6	6	1.6	1.28	1.079	1.152	1.497	0.574	0.616	0.85	0.693	0.868	0.545	0.00061796
A0A452EDT2	Dynein light chain 1, axonemal(predicted) OS=Capra hircus OX=9925 GN=DNAL1 PE=4 SV=1	DNAL1	23.85	12.4	2	3	2	1.358	1.218	1.109	1.028	1.252	0.817	1.044	0.817	0.9	0.866	0.745	0.0021788
A0A452EDV0	Fumarylacetoacetate hydrolase(predicted) OS=Capra hircus OX=9925 GN=FAH PE=4 SV=1	FAH	45.132	6.6	3	4	3	1.021	1.008	1.114	1.053	1.057	1.208	0.92	1.096	0.869	1.12	0.992	0.83126
A0A452EDV9	Short-chain-specific acyl-CoA dehydrogenase, mitochondrial(predicted) OS=Capra hircus OX=9925 GN=ACADS PE=4 SV=1	ACADS	44.285	32.3	11	15	11	1.217	1.096	0.87	1.085	0.999	0.876	1.04	0.777	0.905	1.101	0.892	0.20422
A0A452EDW0	Pre-B-cell leukemia transcription factor-interacting protein 1(predicted) OS=Capra hircus OX=9925 GN=PBXIP1 PE=4 SV=1	PBXIP1	78.028	23.8	16	23	16	0.76	1.172	1.133	0.83	1.037	0.682	0.935	1.518	1.18	0.986	1.075	0.7505
A0A452EDW6	Phospholipase A1 member A(predicted) OS=Capra hircus OX=9925 GN=PLA1A PE=4 SV=1	PLA1A	49.389	3.8	2	3	2	0.916	0.757	1.76	0.789	0.708	1.326	0.926	1.29	1.229	0.837	1.138	0.38764
A0A452EDX7	DCN1-like protein(predicted) OS=Capra hircus OX=9925 GN=DCUN1D1 PE=4 SV=1	DCUN1D1	30.097	27	7	9	7	1.121	0.892	0.586	1.121	0.778	1.615	1.563	0.857	0.957	0.864	1.302	0.21916
A0A452EDZ4	Protein S100(predicted) OS=Capra hircus OX=9925 GN=S100A12 PE=4 SV=1	S100A12	10.89	70.7	7	14	7	0.898	0.967	2.469	1.428	0.975	0.762	0.495	0.822	0.614	0.906	0.534	0.031125
A0A452EE00	MICOS complex subunit(predicted) OS=Capra hircus OX=9925 GN=APOO PE=4 SV=1	APOO	22.519	12.1	2	2	2
A0A452EE04	Calcium-binding and spermatid-specific protein 1(predicted) OS=Capra hircus OX=9925 GN=CABS1 PE=4 SV=1	CABS1	42.459	6.7	2	2	2
A0A452EE29	casein kinase I isoform X6(predicted) OS=Capra hircus OX=9925 GN=CSNK1A1 PE=4 SV=1	CSNK1A1	37.567	13.2	5	5	5	1.14	1.054	0.969	1.13	1.173	0.921	0.948	0.8	1.024	1.115	0.88	0.077781
A0A452EE39	ITM2B(predicted) OS=Capra hircus OX=9925 GN=ITM2B PE=4 SV=1	ITM2B	30.29	10.2	3	4	3	0.859	1.002	1.718	1.323	0.954	0.735	0.781	1.02	0.888	1.195	0.789	0.191517
A0A452EE69	Ig alpha-1 chain C region (Fragment)(predicted) OS=Capra hircus OX=9925 PE=4 SV=1	---	14.514	45.8	5	18	5	0.602	2.634	1.082	0.752	2.833	0.377	0.47	0.463	0.489	0.551	0.297	0.034595
A0A452EE70	Ubiquitin-fold modifier 1(predicted) OS=Capra hircus OX=9925 GN=UFM1 PE=4 SV=1	UFM1	8.9492	28.4	2	3	2	0.923	1.076	0.887	0.81	0.978	1.1	0.932	1.382	1.143	1.22	1.236	0.031819
A0A452EE81	Glutathione S-transferase Mu 1 (Fragment)(predicted) OS=Capra hircus OX=9925 GN=LOC102185621 PE=4 SV=1	LOC102185621	25.649	27.5	6	7	0
A0A452EEE3	glycerophosphodiester phosphodiesterase domain-containing protein 4(predicted) OS=Capra hircus OX=9925 GN=LOC102183041 PE=4 SV=1	LOC102183041	65.844	6.6	3	4	2	1.538	1.197	1.268	1.547	1.162	0.643	0.697	0.675	0.971	0.856	0.572	0.0004834
A0A452EEF1	Ras-related protein Rab-5C(predicted) OS=Capra hircus OX=9925 GN=RAB5C PE=4 SV=1	RAB5C	23.466	15.3	3	5	1	0.613	0.419	0.567	0.699	0.745	2.222	1.723	1.058	1.168	1.194	2.42	0.00105819
A0A452EEG2	Transporter(predicted) OS=Capra hircus OX=9925 GN=LOC102171968 PE=4 SV=1	LOC102171968	71.173	7.1	5	8	5	1.274	1.17	1.115	1.269	1.226	0.77	0.725	1.04	0.932	0.937	0.727	0.00190168
A0A452EEG7	Cytochrome c oxidase subunit 4 isoform 1, mitochondrial(predicted) OS=Capra hircus OX=9925 GN=LOC102188434 PE=4 SV=1	LOC102188434	19.557	31.4	5	5	5	1.421	0.75	1.763	1.211	0.764	0.718	0.859	0.711	0.805	1.213	0.729	0.189896
A0A452EEI9	Polypeptide N-acetylgalactosaminyltransferase(predicted) OS=Capra hircus OX=9925 GN=GALNT12 PE=4 SV=1	GALNT12	66.835	11.4	4	4	4	1.055	1.099	1.275	0.999	1.102	0.928	0.853	1.206	1.024	0.95	0.897	0.152741
A0A452EEL3	Multiple inositol polyphosphate phosphatase 1(predicted) OS=Capra hircus OX=9925 GN=MINPP1 PE=4 SV=1	MINPP1	55.16	24.9	12	20	12	0.97	1.019	1.207	0.965	0.944	0.878	1.018	1.308	1.046	1.031	1.034	0.71304
A0A452EEM4	Peptidoglycan-recognition protein(predicted) OS=Capra hircus OX=9925 GN=PGLYRP1 PE=4 SV=1	PGLYRP1	21.05	34.2	4	7	4	1.188	0.982	1.081	1.606	0.974	0.587	0.395	0.824	0.877	1.029	0.637	0.036245
A0A452EEM5	Ceramide-1-phosphate transfer protein(predicted) OS=Capra hircus OX=9925 GN=CPTP PE=4 SV=1	CPTP	24.544	21	4	5	4	0.716	0.839	0.884	0.818	0.779	1.621	1.31	1.04	1.18	1.239	1.583	0.00053867
A0A452EEN6	Ectonucleotide pyrophosphatase/phosphodiesterase family member 4 (Fragment)(predicted) OS=Capra hircus OX=9925 GN=ENPP4 PE=4 SV=1	ENPP4	51.217	5.1	2	2	2	1.2	0.91	0.866	1.469	0.85	1.047	0.936	1.167	1.011	1.006	0.976	0.97948
A0A452EEP9	Moesin(predicted) OS=Capra hircus OX=9925 GN=MSN PE=4 SV=1	MSN	66.041	21	16	22	7	0.952	0.909	0.967	0.894	1.19	1.242	1	1.019	1.083	0.928	1.073	0.34344
A0A452EEQ6	Tumor associated calcium signal transducer 2(predicted) OS=Capra hircus OX=9925 GN=TACSTD2 PE=4 SV=1	TACSTD2	35.193	3.8	1	1	1	0.775	0.992	1.131	0.887	1.197	1.338	1.227	1.164	0.856	0.914	1.104	0.43492
A0A452EER8	TPP1(predicted) OS=Capra hircus OX=9925 GN=DCHS1 PE=4 SV=1	DCHS1	62.408	19.1	8	10	8	1.009	0.934	0.91	0.911	0.927	1.161	1.343	1.069	1.021	0.974	1.187	0.023957
A0A452EEX0	Vesicle-fusing ATPase-like protein(predicted) OS=Capra hircus OX=9925 GN=NSF PE=4 SV=1	NSF	83.623	47.3	37	62	37	0.748	0.779	0.69	0.802	0.735	1.234	1.543	1.06	1.226	1.406	1.723	5.7056e-05
A0A452EEZ8	RCN1 protein(predicted) OS=Capra hircus OX=9925 GN=RCN1 PE=4 SV=1	RCN1	38.79	37.2	15	28	15	0.763	0.808	0.536	0.878	0.804	1.603	1.609	0.995	1.454	0.901	1.732	0.0076029
A0A452EF34	Vesicle-associated membrane protein 3(predicted) OS=Capra hircus OX=9925 GN=VAMP3 PE=4 SV=1	VAMP3	11.545	48.1	5	21	5	0.988	0.975	0.965	0.98	0.907	0.932	1.041	0.948	0.958	1.35	1.086	0.36098
A0A452EF50	HACL1 protein(predicted) OS=Capra hircus OX=9925 GN=HACL1 PE=4 SV=1	HACL1	63.304	12.6	8	10	8	1.681	0.756	0.857	1.951	0.851	1.456	0.597	0.695	0.778	0.598	0.677	0.185199
A0A452EF84	Coiled-coil domain-containing protein 63(predicted) OS=Capra hircus OX=9925 GN=CCDC63 PE=4 SV=1	CCDC63	65.54	9.5	5	5	5	1.646	1.183	1.163	1.421	1.117	0.673	0.645	0.883	0.693	0.65	0.543	0.00019559
A0A452EFA2	CGREF1(predicted) OS=Capra hircus OX=9925 GN=CGREF1 PE=4 SV=1	CGREF1	28.057	15.4	2	2	2	1.378	1.239	1.365	1.393	1.48	0.49	0.671	0.967	0.752	0.738	0.528	0.0043204
A0A452EFB3	APMAP(predicted) OS=Capra hircus OX=9925 GN=APMAP PE=4 SV=1	APMAP	42.015	20.7	8	9	8	0.898	1.179	1.219	0.843	1.072	0.719	0.79	1.515	1.075	0.965	0.972	0.73014
A0A452EFC3	Prostamide/prostaglandin F synthase(predicted) OS=Capra hircus OX=9925 GN=PRXL2B PE=4 SV=1	PRXL2B	21.454	10	2	2	2
A0A452EFG2	TOR1AIP2 protein(predicted) OS=Capra hircus OX=9925 GN=TOR1AIP2 PE=4 SV=1	TOR1AIP2	51.622	16.2	6	8	6	1.044	0.988	1.338	1.077	0.919	0.688	0.992	1.426	1.016	1.16	0.984	0.80226
A0A452EFK0	Semaphorin 5A(predicted) OS=Capra hircus OX=9925 GN=SEMA5A PE=4 SV=1	SEMA5A	120.3	2.8	3	3	3	1.925	0.962	0.927	2.111	0.958	0.747	0.845	0.719	0.816	0.622	0.545	0.048203
A0A452EFK6	Renin receptor(predicted) OS=Capra hircus OX=9925 GN=ATP6AP2 PE=4 SV=1	ATP6AP2	39.359	19.9	6	8	6	0.828	0.935	1.011	0.804	0.832	1.207	1.343	1.39	1.176	0.857	1.354	0.0156588
A0A452EFM3	Dipeptidase(predicted) OS=Capra hircus OX=9925 GN=DPEP1 PE=4 SV=1	DPEP1	45.124	20.7	7	8	7	1.062	0.994	1.213	1.011	1.033	0.566	0.9	1.283	1.079	1.272	0.96	0.63462
A0A452EFP3	Sperm equatorial segment protein 1(predicted) OS=Capra hircus OX=9925 GN=SPESP1 PE=4 SV=1	SPESP1	41.35	40.9	15	32	15	1.457	1.542	1.051	1.137	1.481	0.622	0.636	0.676	0.679	0.811	0.513	8.3548e-05
A0A452EFP9	Tropomyosin 3 isoform 1 (Fragment)(predicted) OS=Capra hircus OX=9925 PE=4 SV=1	---	27.603	15.3	3	3	3	0.966	1.256	1.156	1.051	1.268	0.766	0.764	0.986	0.922	0.904	0.762	0.006103
A0A452EFR0	N-acetylglucosamine-6-sulfatase OS=Capra hircus OX=9925 GN=GNS PE=4 SV=1	GNS	62.113	20.1	10	16	10	1.03	1.141	0.773	1.077	1.289	1.248	1.02	0.891	1.107	0.791	0.952	0.69268
A0A452EFS9	Ribosomal protein L34(predicted) OS=Capra hircus OX=9925 GN=LOC102186381 PE=4 SV=1	LOC102186381	13.293	15.4	2	2	2	1.307	0.74	1.028	1.898	0.888	1.038	0.777	1.004	0.965	0.816	0.785	0.29758
A0A452EFX0	Itchy E3 ubiquitin protein ligase(predicted) OS=Capra hircus OX=9925 GN=ITCH PE=4 SV=1	ITCH	95.851	2.7	3	3	2
A0A452EFX7	Geranylgeranyl transferase type-2 subunit beta(predicted) OS=Capra hircus OX=9925 GN=RABGGTB PE=4 SV=1	RABGGTB	36.678	2.4	1	1	1	0.839	1.464	0.628	0.826	0.729	1.631	1.239	0.911	1.014	1.14	1.323	0.119123
A0A452EFY1	Ectonucleoside triphosphate diphosphohydrolase 6(predicted) OS=Capra hircus OX=9925 GN=ENTPD6 PE=4 SV=1	ENTPD6	49.962	24.1	8	11	8	0.862	0.961	0.77	0.768	0.965	1.248	1.223	1.158	1.516	1.025	1.426	0.0024646
A0A452EFY7	ACTRT3(predicted) OS=Capra hircus OX=9925 GN=ACTRT3 PE=4 SV=1	ACTRT3	40.663	21.7	6	10	6	1.276	1.079	1.225	1.073	1.145	1.423	0.77	0.801	0.758	0.906	0.803	0.114279
A0A452EFZ7	Glutathione S-transferase A1(predicted) OS=Capra hircus OX=9925 PE=4 SV=1	---	21.315	5.9	1	1	1	0.902	0.943	1.185	0.98	1.258	0.801	0.888	0.789	1.28	1.353	0.97	0.723
A0A452EG13	Glucosidase 2 subunit beta(predicted) OS=Capra hircus OX=9925 GN=PRKCSH PE=4 SV=1	PRKCSH	56.946	11.5	9	13	9	0.89	1.164	0.995	0.9	0.974	1.01	0.965	1.205	1.041	1.031	1.067	0.3067
A0A452EG28	Regulator of G protein signaling 22(predicted) OS=Capra hircus OX=9925 GN=RGS22 PE=4 SV=1	RGS22	123.81	1.5	2	2	2	1.653	1.075	0.811	1.343	0.975	0.659	0.753	1.224	0.936	1.037	0.787	0.199559
A0A452EG78	Succinate dehydrogenase [ubiquinone] iron-sulfur subunit, mitochondrial (Fragment)(predicted) OS=Capra hircus OX=9925 GN=SDHB PE=4 SV=1	SDHB	31.499	30.2	7	11	7	1.546	0.96	1.064	1.364	0.909	0.997	0.869	0.747	0.663	1.25	0.775	0.124818
A0A452EG97	Septin-12(predicted) OS=Capra hircus OX=9925 GN=SEPT12 PE=4 SV=1	SEPT12	40.245	3.4	1	1	1
A0A452EGB0	Dynein heavy chain 1, axonemal(predicted) OS=Capra hircus OX=9925 GN=DNAH1 PE=4 SV=1	DNAH1	496.61	1.1	5	5	3	1.722	0.905	1.212	1.84	1.282	0.653	0.724	0.754	0.774	0.685	0.516	0.0087357
A0A452EGC4	Aspartate aminotransferase(predicted) OS=Capra hircus OX=9925 GN=GOT2 PE=4 SV=1	GOT2	47.706	43.5	20	30	20	1.599	1.304	1.473	1.456	1.245	0.637	0.618	0.544	0.643	0.724	0.447	7.5985e-07
A0A452EGF3	Carboxypeptidase Q(predicted) OS=Capra hircus OX=9925 GN=CPQ PE=4 SV=1	CPQ	52.775	43.3	20	94	20	1.473	1.309	1.333	1.255	1.443	0.684	0.688	0.658	0.762	0.72	0.515	7.7521e-08
A0A452EGJ1	glutamate--cysteine ligase catalytic subunit(predicted) OS=Capra hircus OX=9925 GN=GCLC PE=4 SV=1	GCLC	71.004	23.3	10	14	10	1.074	0.996	0.833	0.856	0.993	1.053	1.224	1.037	1.101	1.237	1.189	0.020941
A0A452EGM8	VAT1(predicted) OS=Capra hircus OX=9925 GN=VAT1 PE=4 SV=1	VAT1	42.751	12.9	4	6	4	0.67	0.844	0.844	0.945	0.796	1.144	1.291	1.411	1.001	1.205	1.476	0.00130453
A0A452EGN1	rho-related GTP-binding protein RhoG(predicted) OS=Capra hircus OX=9925 GN=RHOG PE=4 SV=1	RHOG	21.28	13.6	3	3	2	0.859	0.941	1.068	0.873	0.998	1.1	1.184	1.285	1.21	0.959	1.211	0.0189837
A0A452EGP3	Thioredoxin(predicted) OS=Capra hircus OX=9925 GN=TXN PE=4 SV=1	TXN	11.843	19	4	6	4	0.934	1.067	1.235	1.015	1.138	0.963	0.85	1.008	0.981	1.007	0.892	0.0879
A0A452EGR2	L-lactate dehydrogenase(predicted) OS=Capra hircus OX=9925 GN=LDHC PE=4 SV=1	LDHC	36.072	48.2	16	58	15	1.553	0.925	1.719	1.438	1.059	0.874	0.75	0.64	0.704	0.762	0.557	0.0023368
A0A452EGT0	NDUFB7(predicted) OS=Capra hircus OX=9925 GN=NDUFB7 PE=4 SV=1	NDUFB7	16.337	6.6	1	1	1
A0A452EGT7	A-kinase anchoring protein 12(predicted) OS=Capra hircus OX=9925 GN=AKAP12 PE=4 SV=1	AKAP12	177.24	0.6	1	1	1	1.719	0.788	0.845	1.765	0.934	1.721	0.632	0.818	0.609	0.638	0.73	0.23442
A0A452EGX7	Cornifin alpha(predicted) OS=Capra hircus OX=9925 GN=LOC102183026 PE=4 SV=1	LOC102183026	10.772	50.5	2	2	2	0.926	0.707	2.696	1.032	0.857	0.744	0.587	0.915	0.822	1.23	0.691	0.33534
A0A452EGY9	Fructose-bisphosphate aldolase(predicted) OS=Capra hircus OX=9925 GN=ALDOA PE=4 SV=1	ALDOA	45.136	47.6	23	47	1	1.835	1.612	1.732	1.642	1.479	0.496	0.434	0.359	0.38	0.427	0.253	1.5923e-08
A0A452EGZ6	SREK1 interacting protein 1(predicted) OS=Capra hircus OX=9925 GN=SREK1IP1 PE=4 SV=1	SREK1IP1	12.7	7.3	1	1	1	1.119	0.977	1.188	1.03	0.889	0.813	0.759	1.881	0.863	1.071	1.035	0.91064
A0A452EH19	FOLH1 protein(predicted) OS=Capra hircus OX=9925 GN=FOLH1 PE=4 SV=1	FOLH1	83.231	3.8	3	6	1	0.952	0.952	1.024	0.886	1.014	1.158	1.107	0.906	1.359	1.052	1.156	0.087822
A0A452EH23	Calsyntenin 1(predicted) OS=Capra hircus OX=9925 GN=CLSTN1 PE=4 SV=1	CLSTN1	106.36	8.9	7	9	7	0.961	1.102	0.957	0.897	1.019	1.202	1.233	1.056	0.983	0.791	1.067	0.5491
A0A452EH31	YY1 protein(predicted) OS=Capra hircus OX=9925 GN=YY1 PE=4 SV=1	YY1	44.763	1.9	1	4	1	0.738	0.864	1.179	1.03	1.284	1.147	1.195	1.244	0.735	1.067	1.058	0.68026
A0A452EH63	Fructose-bisphosphate aldolase(predicted) OS=Capra hircus OX=9925 GN=ALDOA PE=4 SV=1	ALDOA	39.436	52.7	23	42	1	1.231	1.133	0.917	1.046	1.245	0.769	1.08	1.008	0.964	1.032	0.871	0.129944
A0A452EH79	COP9 signalosome complex subunit 6 (Fragment)(predicted) OS=Capra hircus OX=9925 GN=COPS6 PE=4 SV=1	COPS6	36.28	24.7	6	7	6	0.944	0.87	1.039	1.076	0.902	1.199	1.223	0.985	1.111	1.009	1.144	0.055179
A0A452EH85	Xaa-Pro aminopeptidase 1 (Fragment)(predicted) OS=Capra hircus OX=9925 GN=XPNPEP1 PE=4 SV=1	XPNPEP1	68.278	9.5	5	6	5	0.707	0.806	0.716	0.746	0.679	1.648	1.278	1.053	1.389	1.481	1.874	5.9982e-05
A0A452EHB0	Aldehyde oxidase 1(predicted) OS=Capra hircus OX=9925 GN=AOX1 PE=4 SV=1	AOX1	147.66	2.5	3	3	3	0.897	1.375	1.285	0.97	1.447	0.638	0.946	1.078	0.945	0.892	0.753	0.064144
A0A452EHC3	Ras-related protein Ral-A(predicted) OS=Capra hircus OX=9925 GN=RALA PE=4 SV=1	RALA	23.54	22.8	6	12	5	0.907	0.957	0.852	0.84	1.081	1.147	1.241	0.942	1.209	1.201	1.238	0.0137019
A0A452EHD5	Spectrin alpha chain, non-erythrocytic 1 OS=Capra hircus OX=9925 GN=SPTAN1 PE=4 SV=1	SPTAN1	276.74	2.7	6	7	6	1.4	0.972	1.023	1.39	1.114	1.128	0.712	0.934	0.795	0.681	0.72	0.024037
A0A452EHF3	Kruppel-associated box-containing zinc-finger protein(predicted) OS=Capra hircus OX=9925 GN=LOC102175108 PE=4 SV=1	LOC102175108	82.145	1	1	1	1	1.162	1.882	0.541	1.281	2.332	0.762	0.523	0.372	0.754	0.737	0.437	0.031063
A0A452EHG5	Diacylglycerol kinase(predicted) OS=Capra hircus OX=9925 GN=DGKA PE=4 SV=1	DGKA	81.898	6.7	5	5	5	1.041	0.846	1.015	1.046	1.095	0.909	1.106	0.938	0.88	0.932	0.945	0.37528
A0A452EHJ6	Hydroxyacyl-Coenzyme A dehydrogenase(predicted) OS=Capra hircus OX=9925 GN=HADH PE=4 SV=1	HADH	34.364	24.5	8	9	8	1.12	1.135	0.947	0.966	1.159	1.126	0.902	1.035	1.122	1.041	0.981	0.75956
A0A452EHL5	Casein kinase II subunit beta(predicted) OS=Capra hircus OX=9925 GN=CSNK2B PE=4 SV=1	CSNK2B	24.942	23.3	4	5	4	2.036	1.144	1.117	2.292	0.924	0.635	0.515	0.543	0.587	0.626	0.387	0.0085802
A0A452EHM0	Nicotinamide phosphoribosyltransferase(predicted) OS=Capra hircus OX=9925 GN=NAMPT PE=4 SV=1	NAMPT	55.414	9.2	5	6	5	0.801	0.986	0.964	0.881	0.908	1.073	1.328	0.956	1.134	1.082	1.228	0.0141975
A0A452EHM9	B-cell receptor-associated protein 29 isoform X2(predicted) OS=Capra hircus OX=9925 GN=BCAP29 PE=4 SV=1	BCAP29	28.092	6.2	1	1	1	1.722	1.046	1.228	1.355	1.809	0.635	0.523	0.827	0.693	0.615	0.46	0.00031807
A0A452EHN0	Arylsulfatase A(predicted) OS=Capra hircus OX=9925 GN=ARSA PE=4 SV=1	ARSA	53.824	29.8	13	50	12	1.333	1.257	0.902	1.206	1.478	0.859	0.928	0.661	0.862	0.82	0.669	0.0043831
A0A452EHN1	Procollagen C-endopeptidase enhancer(predicted) OS=Capra hircus OX=9925 GN=PCOLCE PE=4 SV=1	PCOLCE	48.28	4.7	1	2	1	0.757	1.34	1.989	0.614	1.633	0.587	0.898	0.97	0.912	0.793	0.657	0.198575
A0A452EHN4	Fascin(predicted) OS=Capra hircus OX=9925 GN=FSCN1 PE=4 SV=1	FSCN1	54.757	27.8	12	12	12	0.86	0.814	0.841	0.89	0.757	1.192	1.485	1.015	1.28	1.199	1.483	0.00042236
A0A452EHR0	TARS(predicted) OS=Capra hircus OX=9925 GN=TARS PE=4 SV=1	TARS	80.815	2.6	2	2	2	1.001	0.83	0.803	1.097	0.811	1.043	1.027	1.273	1.356	1.205	1.3	0.0135369
A0A452EHR1	Echinoderm microtubule associated protein like 2(predicted) OS=Capra hircus OX=9925 GN=EML2 PE=4 SV=1	EML2	71.026	4.8	2	2	2	0.993	0.907	1.907	0.866	1.201	0.902	0.848	1.041	0.917	0.919	0.788	0.25516
A0A452EHR7	Desmoplakin (Fragment)(predicted) OS=Capra hircus OX=9925 GN=DSP PE=4 SV=1	DSP	332.58	0.6	2	2	2	0.872	0.957	0.945	0.799	0.651	1.251	0.993	1.77	1.269	1.047	1.499	0.0129984
A0A452EHU1	N-acetyllactosaminide beta-1,3-N-acetylglucosaminyltransferase(predicted) OS=Capra hircus OX=9925 GN=B4GAT1 PE=4 SV=1	B4GAT1	47.231	20.5	7	10	7	0.887	1.358	1.072	0.95	1.286	0.924	0.978	1.265	1.001	0.87	0.907	0.40416
A0A452EHW1	Histone H2B(predicted) OS=Capra hircus OX=9925 GN=LOC102172676 PE=4 SV=1	LOC102172676	13.823	26.2	3	6	1
A0A452EHW7	Fms related tyrosine kinase 4(predicted) OS=Capra hircus OX=9925 GN=FLT4 PE=4 SV=1	FLT4	147.52	1.4	2	3	2	1.064	1.117	0.913	0.802	1.192	1.326	0.874	1.173	1.053	0.847	1.036	0.78714
A0A452EHY9	Ribokinase(predicted) OS=Capra hircus OX=9925 GN=RBKS PE=4 SV=1	RBKS	33.649	5.7	2	2	2	2.486	0.558	0.648	2.433	0.601	2.195	0.517	0.513	0.341	0.176	0.556	0.21544
A0A452EHZ0	Protein phosphatase methylesterase 1(predicted) OS=Capra hircus OX=9925 GN=PPME1 PE=4 SV=1	PPME1	41.448	37.6	12	19	12	0.906	0.89	0.783	0.93	0.855	1.426	1.307	1.15	1.055	1.156	1.396	0.00063867
A0A452EHZ5	Alstrom syndrome protein 1 (Fragment)(predicted) OS=Capra hircus OX=9925 GN=ALMS1 PE=4 SV=1	ALMS1	419.52	3.5	11	14	11	1.198	1.368	0.945	1.175	1.811	0.923	0.699	0.619	0.788	0.737	0.58	0.0029002
A0A452EI06	F-actin-capping protein subunit alpha-2(predicted) OS=Capra hircus OX=9925 GN=CAPZA2 PE=4 SV=1	CAPZA2	32.506	8.2	2	2	1
A0A452EI99	EFCAB2 protein(predicted) OS=Capra hircus OX=9925 GN=EFCAB2 PE=4 SV=1	EFCAB2	18.984	12.8	2	2	2	0.849	1.103	0.749	0.808	1.266	1.213	1.144	1.15	1.096	1.062	1.186	0.1364
A0A452EIH3	Spermatogenesis-associated protein 20(predicted) OS=Capra hircus OX=9925 GN=SPATA20 PE=4 SV=1	SPATA20	88.492	1.3	1	1	1	1.298	0.867	0.993	1.306	0.981	1.488	0.91	0.929	0.901	0.786	0.921	0.50672
A0A452EIH8	Nucleobindin-1(predicted) OS=Capra hircus OX=9925 GN=NUCB1 PE=4 SV=1	NUCB1	54.652	54.6	31	116	31	0.771	0.931	1.185	0.772	0.849	0.941	0.907	1.507	1.28	1.274	1.311	0.068879
A0A452EII4	snRNA-activating protein complex subunit 4 isoform X2(predicted) OS=Capra hircus OX=9925 GN=SNAPC4 PE=4 SV=1	SNAPC4	145.26	1.4	1	1	1	0.924	1.193	1.478	1.177	1.158	1.103	0.897	0.767	0.851	0.902	0.762	0.022685
A0A452EII9	Chondroadherin(predicted) OS=Capra hircus OX=9925 GN=CHAD PE=4 SV=1	CHAD	40.829	3.6	1	1	1	1.136	1.878	1.007	0.656	0.619	0.442	0.82	1.312	1.888	0.731	0.981	0.86376
A0A452EIQ9	Sorting nexin-9 (Fragment)(predicted) OS=Capra hircus OX=9925 GN=SNX9 PE=4 SV=1	SNX9	65.99	3.2	2	2	2
A0A452EIR1	Elongation factor 2(predicted) OS=Capra hircus OX=9925 GN=EEF2 PE=4 SV=1	EEF2	95.367	15.9	12	17	12	1.307	0.847	0.912	1.707	0.87	1.346	0.746	0.815	0.933	0.783	0.819	0.32236
A0A452EIR7	transmembrane protein 134 isoform X3(predicted) OS=Capra hircus OX=9925 GN=TMEM134 PE=4 SV=1	TMEM134	20.561	4.4	1	1	1	0.481	0.346	0.298	0.524	0.367	1.149	1.838	1.351	1.531	2.434	4.119	3.5167e-05
A0A452EIS4	F-box/LRR-repeat protein 2(predicted) OS=Capra hircus OX=9925 GN=FBXL2 PE=4 SV=1	FBXL2	44.69	1.7	1	1	1
A0A452EIV1	septin-7 isoform X3(predicted) OS=Capra hircus OX=9925 GN=SEPT7 PE=4 SV=1	SEPT7	48.717	8.1	4	4	4
A0A452EIW8	Thimet oligopeptidase(predicted) OS=Capra hircus OX=9925 GN=THOP1 PE=4 SV=1	THOP1	74.422	22	12	12	12	1.094	0.996	0.876	1.102	0.989	1.268	1.019	0.905	1.017	1.041	1.038	0.62608
A0A452EIX1	Medium-chain specific acyl-CoA dehydrogenase, mitochondrial(predicted) OS=Capra hircus OX=9925 GN=LOC102179380 PE=4 SV=1	LOC102179380	44.635	27	11	17	11	1.343	1.066	0.886	1.029	0.966	0.918	0.988	0.726	0.792	1.366	0.905	0.40378
A0A452EIX3	Protein FAM151A (Fragment)(predicted) OS=Capra hircus OX=9925 GN=FAM151A PE=4 SV=1	FAM151A	64.094	20.1	11	15	11	1.402	0.767	0.9	1.47	0.685	1.909	0.737	0.912	0.749	0.667	0.952	0.74266
A0A452EIX9	Cell division cycle 42 (GTP binding protein, 25kDa), isoform CRA_c(predicted) OS=Capra hircus OX=9925 GN=CDC42 PE=4 SV=1	CDC42	21.31	17.3	3	3	1	0.718	0.948	1.363	0.842	0.984	1.264	1.235	1.052	1.151	0.91	1.156	0.22226
A0A452EJ06	SH3 domain-binding protein 4(predicted) OS=Capra hircus OX=9925 GN=SH3BP4 PE=4 SV=1	SH3BP4	105.5	2	1	1	1	0.708	1.175	1.414	1.17	1.324	0.735	0.982	0.99	0.942	1.015	0.805	0.18536
A0A452EJ14	Dipeptidyl peptidase 1(predicted) OS=Capra hircus OX=9925 GN=CTSC PE=4 SV=1	CTSC	51.859	23.1	9	13	9	1.438	0.971	1.079	1.581	0.953	0.893	0.777	0.956	1.094	0.728	0.739	0.050701
A0A452EJ15	Carnitine O-palmitoyltransferase 2, mitochondrial(predicted) OS=Capra hircus OX=9925 GN=CPT2 PE=4 SV=1	CPT2	74.592	28.1	15	19	15	1.388	1.097	1.016	1.236	1.071	0.951	0.833	0.778	0.862	1.034	0.768	0.0081569
A0A452EJ31	Serine/threonine-protein phosphatase PP1-beta catalytic subunit(predicted) OS=Capra hircus OX=9925 GN=PPP1CB PE=4 SV=1	PPP1CB	36.897	41	14	26	3	0.935	0.976	0.963	0.984	0.977	1.168	1.211	1.049	0.975	1.075	1.133	0.03724
A0A452EJ37	UPF0764 protein C16orf89 homolog(predicted) OS=Capra hircus OX=9925 GN=C16orf89 PE=4 SV=1	C16orf89	40.867	9.7	3	4	3	0.748	0.931	1.042	0.784	0.807	0.821	0.938	1.376	0.958	1.757	1.357	0.115403
A0A452EJ79	general vesicular transport factor p115 isoform X2(predicted) OS=Capra hircus OX=9925 GN=USO1 PE=4 SV=1	USO1	104.46	2.6	2	2	2	1.156	0.759	0.617	1.287	0.739	1.984	0.726	1.369	0.911	0.967	1.307	0.31216
A0A452EJ82	SUN domain containing ossification factor(predicted) OS=Capra hircus OX=9925 GN=SUCO PE=4 SV=1	SUCO	136.91	3.6	3	3	3	1.068	1.091	0.799	0.866	1.185	1.38	1.375	0.919	0.951	1.047	1.132	0.33168
A0A452EJ87	voltage-dependent calcium channel subunit alpha-2/delta-2 isoform X8(predicted) OS=Capra hircus OX=9925 GN=CACNA2D2 PE=4 SV=1	CACNA2D2	128.99	12.4	15	22	15	1.234	0.911	0.74	1.233	1.081	1.07	1.1	0.792	0.911	1.234	0.982	0.93018
A0A452EJD1	Phosphoglycolate phosphatase(predicted) OS=Capra hircus OX=9925 GN=PGP PE=4 SV=1	PGP	34.436	58.7	17	46	17	0.903	1.025	0.779	0.917	1.002	1.439	1.178	0.914	0.969	1.188	1.23	0.069041
A0A452EJE6	Cat eye syndrome chromosome region, candidate 5 isoform 2(predicted) OS=Capra hircus OX=9925 GN=HDHD5 PE=4 SV=1	HDHD5	42.464	5.6	2	2	2	0.96	1.165	0.779	1.022	1.274	1.141	1.006	0.837	1.106	1.104	0.999	0.94904
A0A452EJE8	G protein subunit alpha 13(predicted) OS=Capra hircus OX=9925 GN=GNA13 PE=4 SV=1	GNA13	43.946	2.4	1	1	1
A0A452EJF1	Tetratricopeptide repeat protein 14(predicted) OS=Capra hircus OX=9925 GN=TTC14 PE=4 SV=1	TTC14	88.186	0.9	1	2	1	0.61	1.601	1.1	0.607	1.149	0.598	0.683	1.399	1.598	1.138	1.069	0.81636
A0A452EJJ7	Acid sphingomyelinase-like phosphodiesterase(predicted) OS=Capra hircus OX=9925 GN=SMPDL3B PE=4 SV=1	SMPDL3B	50.719	6.8	3	3	3	1.119	1.037	1.093	1.131	1.109	1.039	0.94	0.98	1.06	0.944	0.904	0.0078972
A0A452EJP9	Radial spoke head protein 9 like protein(predicted) OS=Capra hircus OX=9925 GN=RSPH9 PE=4 SV=1	RSPH9	31.336	18.8	4	4	4	2.001	1.425	1.123	1.659	0.969	0.528	0.536	0.624	0.762	0.726	0.443	0.00076097
A0A452EJS2	Platelet-activating factor acetylhydrolase(predicted) OS=Capra hircus OX=9925 GN=PLA2G7 PE=4 SV=1	PLA2G7	50.003	7.7	4	4	4	1.027	0.958	1.325	1.001	0.946	0.93	1.094	1.1	1.081	0.855	0.963	0.67106
A0A452EJT8	T-complex protein 1 subunit delta(predicted) OS=Capra hircus OX=9925 GN=CCT4 PE=4 SV=1	CCT4	57.938	67.5	30	79	10	0.807	0.744	0.647	0.83	0.702	1.752	1.181	0.972	1.124	1.399	1.723	0.00142439
A0A452EJT9	KLKBL4 protein(predicted) OS=Capra hircus OX=9925 GN=PRSS54 PE=4 SV=1	PRSS54	36.932	26	8	16	8	1.801	1.449	0.915	1.556	1.843	0.62	0.622	0.46	0.608	0.574	0.381	0.000140256
A0A452EJV7	Ubiquitin thioesterase OTU1(predicted) OS=Capra hircus OX=9925 GN=YOD1 PE=4 SV=1	YOD1	37.865	17.8	6	8	6	0.771	0.765	1.248	0.943	0.966	1.288	1.181	0.949	1.076	1.265	1.227	0.077199
A0A452EJX2	Reticulon(predicted) OS=Capra hircus OX=9925 GN=RTN3 PE=4 SV=1	RTN3	25.479	4.6	1	1	1
A0A452EK10	Interleukin 4 induced 1(predicted) OS=Capra hircus OX=9925 GN=IL4I1 PE=4 SV=1	IL4I1	62.235	51.2	29	64	29	1.617	0.949	1.462	1.576	0.862	0.453	0.758	0.736	0.896	0.956	0.588	0.022382
A0A452EK22	Ceruloplasmin(predicted) OS=Capra hircus OX=9925 GN=CP PE=4 SV=1	CP	119.68	17.8	16	3	2	1.286	0.879	1.624	1.487	0.961	0.812	0.698	1.538	0.784	0.528	0.699	0.099183
A0A452EK25	Septin-8(predicted) OS=Capra hircus OX=9925 GN=SEPT8 PE=4 SV=1	SEPT8	49.859	4	1	1	1	1.034	1.178	2.385	0.889	1.169	0.678	0.69	1.159	0.956	0.443	0.59	0.061117
A0A452EK40	DNA-dependent protein kinase catalytic subunit isoform X5(predicted) OS=Capra hircus OX=9925 GN=PRKDC PE=4 SV=1	PRKDC	463.67	0.3	1	1	1	1.143	0.686	1.505	1.417	0.605	0.956	0.686	1.161	0.995	1.328	0.957	0.99608
A0A452EK46	Sulfhydryl oxidase(predicted) OS=Capra hircus OX=9925 GN=QSOX2 PE=4 SV=1	QSOX2	77.146	19	13	19	13	0.769	0.941	0.751	0.849	0.92	1.533	1.207	1.125	1.12	1.165	1.454	0.00104069
A0A452EK49	Major prion protein OS=Capra hircus OX=9925 GN=PRNP PE=4 SV=1	PRNP	27.565	24.1	6	17	6	0.796	0.944	1.172	0.862	0.937	1.184	0.991	1.489	1.117	1.042	1.236	0.059859
A0A452EK68	C-X-C motif chemokine(predicted) OS=Capra hircus OX=9925 GN=LOC102182395 PE=4 SV=1	LOC102182395	10.939	44.7	3	6	3	1.258	1.133	1.283	1.428	1.075	0.762	0.855	0.841	0.734	0.782	0.643	6.1475e-05
A0A452EK79	TMED7 protein(predicted) OS=Capra hircus OX=9925 GN=TMED7 PE=4 SV=1	TMED7	25.335	20	4	6	4	1.089	1.016	1.033	1.099	1.12	1.049	0.918	1.042	0.896	0.877	0.893	0.026361
A0A452EK88	Beta-galactosidase(predicted) OS=Capra hircus OX=9925 GN=GLB1 PE=4 SV=1	GLB1	72.641	30.8	19	83	18	0.748	0.726	0.644	0.747	0.781	1.514	1.817	1.057	1.133	1.094	1.814	0.0067152
A0A452EK93	translationally-controlled tumor protein-like isoform X1(predicted) OS=Capra hircus OX=9925 GN=TPT1 PE=4 SV=1	TPT1	21.843	24.5	4	6	1
A0A452EKA8	FARSB protein(predicted) OS=Capra hircus OX=9925 GN=FARSB PE=4 SV=1	FARSB	66.359	13.2	8	9	8	1.448	0.83	0.784	2.146	0.802	1.359	0.653	0.781	0.892	0.671	0.725	0.29232
A0A452EKB3	IgG heavy chian constant region (Fragment)(predicted) OS=Capra hircus OX=9925 PE=4 SV=1	---	35.578	20.2	6	9	5	0.885	0.877	2.254	0.878	0.941	0.651	0.768	1.524	0.811	0.894	0.797	0.43658
A0A452EKB4	Actin-related protein 2/3 complex subunit 1A(predicted) OS=Capra hircus OX=9925 PE=4 SV=1	---	40.067	3.9	1	1	1	0.91	0.813	0.972	1.144	0.692	1.66	1.285	0.926	0.951	1.081	1.303	0.100941
A0A452EKB7	Isocitrate dehydrogenase [NAD] subunit, mitochondrial(predicted) OS=Capra hircus OX=9925 GN=IDH3A PE=4 SV=1	IDH3A	39.697	38.8	12	18	12	0.868	0.933	0.92	0.917	0.834	1.441	1.115	0.93	0.941	1.352	1.292	0.059999
A0A452EKB8	PDXP(predicted) OS=Capra hircus OX=9925 GN=PDXP PE=4 SV=1	PDXP	33.48	6.4	1	1	1	0.918	0.906	1.316	0.907	0.896	0.994	0.907	1.19	1.263	1.172	1.118	0.26612
A0A452EKC9	Lysine--tRNA ligase(predicted) OS=Capra hircus OX=9925 GN=KARS PE=4 SV=1	KARS	67.896	10.1	6	8	6	1.38	0.843	0.939	1.674	0.934	1.307	0.802	0.913	0.782	0.903	0.816	0.2827
A0A452EKH0	UDP-glucose 4-epimerase(predicted) OS=Capra hircus OX=9925 GN=GALE PE=4 SV=1	GALE	38.315	31.3	10	12	10	0.832	0.831	0.887	0.92	0.836	1.076	1.257	1.145	1.228	1.266	1.387	2.1761e-05
A0A452EKH5	ADP-sugar pyrophosphatase isoform X3(predicted) OS=Capra hircus OX=9925 GN=NUDT5 PE=4 SV=1	NUDT5	24.122	15.7	3	3	3	0.769	0.893	1.112	0.887	1.083	1.137	1.246	1.098	1.076	1.141	1.201	0.030977
A0A452EKH7	Lipase H(predicted) OS=Capra hircus OX=9925 GN=LIPH PE=4 SV=1	LIPH	51.328	15.1	6	11	6	1.103	1.083	1.099	1.072	1.236	0.689	0.85	0.957	1.242	0.883	0.826	0.103155
A0A452EKL0	Nicotinamide riboside kinase 1(predicted) OS=Capra hircus OX=9925 GN=NMRK1 PE=4 SV=1	NMRK1	22.219	17.5	2	2	2	0.814	0.689	1.171	0.849	0.717	1.159	1.468	1.261	1.183	1.151	1.467	0.0050631
A0A452EKM6	Tartrate-resistant acid phosphatase type 5(predicted) OS=Capra hircus OX=9925 GN=ACP5 PE=4 SV=1	ACP5	38.282	28.6	7	15	7	1.245	1.271	0.823	1.251	0.99	0.748	0.592	1.47	1.362	0.703	0.874	0.37804
A0A452EKS9	Ubiquitin thioesterase(predicted) OS=Capra hircus OX=9925 GN=OTUB1 PE=4 SV=1	OTUB1	31.308	24.7	6	8	6	1.385	0.727	0.685	1.596	0.767	1.332	1.192	0.809	0.933	0.783	0.978	0.92118
A0A452EKW5	Nebulin(predicted) OS=Capra hircus OX=9925 GN=NEB PE=4 SV=1	NEB	771.34	0.2	1	1	1	0.607	1.27	1.204	1.156	0.945	0.057		3.378	0.104	1.101	1.119	0.39886
A0A452EKY6	NASP (Fragment)(predicted) OS=Capra hircus OX=9925 GN=NASP PE=4 SV=1	NASP	83.363	3.2	2	2	2	0.816	1.096	0.886	0.892	1.256	1.704	0.992	1.049	0.894	0.884	1.117	0.5453
A0A452EKZ6	GDH/6PGL endoplasmic bifunctional protein (Fragment)(predicted) OS=Capra hircus OX=9925 GN=H6PD PE=4 SV=1	H6PD	87.023	39.3	29	54	29	0.951	0.977	1.026	0.968	1.053	1.122	1.074	1.307	0.979	0.864	1.075	0.42816
A0A452EL04	BH3 interacting domain death agonist(predicted) OS=Capra hircus OX=9925 GN=BID PE=4 SV=1	BID	21.29	15.7	2	2	2	0.939	0.806	0.762	0.743	0.908	1.36	1.612	1.026	1.081	1.17	1.503	0.0029755
A0A452EL27	Eukaryotic translation initiation factor 3 subunit L(predicted) OS=Capra hircus OX=9925 GN=EIF3L PE=4 SV=1	EIF3L	66.726	15.8	9	11	9	1.072	0.843	0.656	1.486	0.907	0.968	1.081	1.215	1.07	1.247	1.124	0.324
A0A452EL50	Actin-related protein 2(predicted) OS=Capra hircus OX=9925 GN=ACTR2 PE=4 SV=1	ACTR2	44.76	10.2	3	3	3	0.911	0.912	0.94	1.158	0.892	1.22	1.068	0.92	0.976	1.189	1.116	0.172699
A0A452EL53	Succinyl-CoA:3-ketoacid-coenzyme A transferase(predicted) OS=Capra hircus OX=9925 PE=4 SV=1	---	31.742	19	6	8	1	1.14	1.037	0.846	1.15	1.139	1.279	0.801	0.777	0.993	1.232	0.957	0.6328
A0A452EL54	Adseverin(predicted) OS=Capra hircus OX=9925 GN=SCIN PE=4 SV=1	SCIN	80.582	12.6	7	7	7	0.782	1.266	1.115	0.776	1.243	1.037	0.984	1.094	1.037	1.057	1.005	0.81386
A0A452EL56	Nucleoside diphosphate-linked moiety X motif 17(predicted) OS=Capra hircus OX=9925 GN=NUDT17 PE=4 SV=1	NUDT17	32.116	3	1	1	1	0.682	1.357	0.87	0.953	1.372	1.197	1.291	0.836	0.776	1.073	0.988	0.98006
A0A452EL58	NAD(P)H-hydrate epimerase(predicted) OS=Capra hircus OX=9925 GN=NAXE PE=4 SV=1	NAXE	30.849	36.2	9	11	9	1.152	1.156	1.077	1.191	1.189	1.144	0.979	0.746	0.829	0.959	0.808	0.041798
A0A452EL69	laminin subunit gamma-1(predicted) OS=Capra hircus OX=9925 GN=LAMC1 PE=4 SV=1	LAMC1	177.77	17.4	22	30	22	0.929	1.175	1.001	1.08	1.115	0.818	0.939	1.273	1.025	0.839	0.923	0.34908
A0A452EL72	MLEC protein(predicted) OS=Capra hircus OX=9925 GN=MLEC PE=4 SV=1	MLEC	31.594	28.3	8	9	8	0.882	1.097	1.279	0.922	1.053	0.871	0.991	1.442	1.034	0.799	0.982	0.8032
A0A452EL84	URB2 protein(predicted) OS=Capra hircus OX=9925 GN=URB2 PE=4 SV=1	URB2	164.92	0.5	1	1	1
A0A452EL91	Tyrosine--tRNA ligase(predicted) OS=Capra hircus OX=9925 GN=YARS PE=4 SV=1	YARS	59.156	4.9	2	2	2	1.329	0.946	0.875	1.616	0.83	1.435	0.944	0.872	0.794	0.809	0.867	0.45424
A0A452ELB6	Extracellular sulfatase Sulf-2(predicted) OS=Capra hircus OX=9925 GN=SULF2 PE=4 SV=1	SULF2	97.265	2.4	2	2	2	1.044	0.988	1.001	1.065	1.023	1.175	1.082	0.964	1.136	0.955	1.037	0.49328
A0A452ELC6	N-acetylglucosamine-6-phosphate deacetylase(predicted) OS=Capra hircus OX=9925 GN=AMDHD2 PE=4 SV=1	AMDHD2	43.526	14.9	5	5	5	1.165	1.048	0.863	0.926	1.006	1.202	1.05	0.721	0.996	1.199	1.032	0.85352
A0A452ELD4	Vitronectin (Fragment)(predicted) OS=Capra hircus OX=9925 GN=VTN PE=4 SV=1	VTN	51.206	22	8	11	1	0.986	1.431	1.357	1.173	1.204	0.958	0.776	0.861	0.974	0.747	0.702	0.0030607
A0A452ELE0	ATXN3(predicted) OS=Capra hircus OX=9925 GN=ATXN3 PE=4 SV=1	ATXN3	41.475	9.2	4	6	4	0.752	0.851	0.867	0.786	0.862	1.025	1.25	1.153	1.128	1.382	1.442	0.00024054
A0A452ELE3	Beta-defensin(predicted) OS=Capra hircus OX=9925 GN=DEFB127 PE=4 SV=1	DEFB127	11.853	36.4	4	6	4	1.302	0.855	1.096	1.54	0.971	0.957	0.749	1.076	0.92	0.879	0.795	0.111122
A0A452ELE4	NADH dehydrogenase [ubiquinone] 1 alpha subcomplex subunit 10, mitochondrial(predicted) OS=Capra hircus OX=9925 GN=NDUFA10 PE=4 SV=1	NDUFA10	40.333	3.1	1	1	1	1.771	1.01	0.795	1.583	1.052	0.897	0.799	0.653	0.634	1.188	0.672	0.07748
A0A452ELE6	40S ribosomal protein S26(predicted) OS=Capra hircus OX=9925 GN=RPS26 PE=4 SV=1	RPS26	13.015	20.9	2	2	2	1.461	0.886	0.833	1.866	0.896	1.011	0.868	0.811	0.916	0.87	0.753	0.23566
A0A452ELE7	Complement C2(predicted) OS=Capra hircus OX=9925 GN=C2 PE=4 SV=1	C2	82.74	12.1	8	9	8	1.087	1.145	1.638	1.062	1.105	0.666	0.815	1.095	0.963	0.825	0.723	0.023698
A0A452ELG2	Beta defensin OBD138(predicted) OS=Capra hircus OX=9925 PE=4 SV=1	---	6.7683	39	2	8	2	0.914	1.095	1.016	0.949	1.293	0.922	1.178	0.966	0.903	1.117	0.966	0.69598
A0A452ELH1	Testis-expressed protein 29(predicted) OS=Capra hircus OX=9925 GN=TEX29 PE=4 SV=1	TEX29	16.287	25.9	6	7	6	1.558	1.293	1.208	1.352	1.342	0.687	0.88	0.62	0.733	0.62	0.524	2.4826e-05
A0A452ELJ1	Beta-defensin 15(predicted) OS=Capra hircus OX=9925 GN=LOC106503663 PE=4 SV=1	LOC106503663	7.5079	55.2	6	16	6	0.775	0.861	0.684	0.76	1.089	2.372	0.946	0.814	1.077	0.91	1.468	0.172458
A0A452ELK1	Spermadhesin Z13(predicted) OS=Capra hircus OX=9925 GN=LOC102175549 PE=4 SV=1	LOC102175549	13.483	72.4	10	248	10	0.963	1.075	1.38	0.927	0.96	0.811	0.91	1.505	0.975	0.917	0.965	0.71228
A0A452ELK2	Epididymis secretory sperm binding protein(predicted) OS=Capra hircus OX=9925 GN=ACTR1A PE=4 SV=1	ACTR1A	42.613	31.6	9	12	5	0.871	0.886	0.637	0.967	0.81	0.803	1.438	1.189	1.117	1.456	1.439	0.026378
A0A452ELN3	Mitochondrial peptide methionine sulfoxide reductase(predicted) OS=Capra hircus OX=9925 GN=MSRA PE=4 SV=1	MSRA	25.344	23.8	5	5	5	1.39	1.108	1.017	1.219	1.3	1.048	0.912	0.589	0.748	0.845	0.686	0.0085573
A0A452ELR7	Dynactin subunit 5(predicted) OS=Capra hircus OX=9925 GN=DCTN5 PE=4 SV=1	DCTN5	20.14	15.9	3	3	3	0.921	1.029	0.947	0.976	0.94	0.725	1.135	1.132	1.056	1.478	1.148	0.38304
A0A452ELR9	NADH-cytochrome b5 reductase 1(predicted) OS=Capra hircus OX=9925 GN=CYB5R1 PE=4 SV=1	CYB5R1	33.857	34.4	10	12	10	1.314	0.997	1.082	1.239	1.411	0.832	0.795	0.698	0.745	1.232	0.712	0.0173208
A0A452ELS1	Serpin A3-6(predicted) OS=Capra hircus OX=9925 GN=LOC102186111 PE=4 SV=1	LOC102186111	46.123	20.9	9	6	2	2.121	1.024	1.283	2.101	0.968	0.622	0.651	0.682	0.646	0.444	0.406	0.00182399
A0A452ELU4	SEC23-interacting protein(predicted) OS=Capra hircus OX=9925 GN=SEC23IP PE=4 SV=1	SEC23IP	111.77	3.7	4	4	4	0.936	0.905	0.768	1.019	0.751	1.426	1.151	0.997	1.206	1.064	1.335	0.0094152
A0A452ELU5	Serpin B6(predicted) OS=Capra hircus OX=9925 GN=LOC102178679 PE=4 SV=1	LOC102178679	42.554	34.1	14	31	5	1.578	0.617	1.053	1.567	0.589	1.148	0.996	0.857	0.746	1.232	0.921	0.96734
A0A452ELX7	EPS15 protein(predicted) OS=Capra hircus OX=9925 GN=EPS15 PE=4 SV=1	EPS15	100.33	13.1	10	11	10	0.911	0.868	0.766	0.915	0.87	1.149	1.471	0.919	1.146	1.237	1.368	0.0060976
A0A452ELZ3	AKR7A2 protein(predicted) OS=Capra hircus OX=9925 GN=LOC102170282 PE=4 SV=1	LOC102170282	32.872	52.2	13	14	6	0.912	1.021	0.798	0.901	1.116	1.144	1.242	1.068	1.045	1.176	1.195	0.023397
A0A452EM11	Apolipoprotein C-III (Fragment)(predicted) OS=Capra hircus OX=9925 GN=APOC3 PE=4 SV=1	APOC3	10.767	41.2	3	4	3	1.169	1.179	1.154	1.014	1.184	0.843	0.929	1.318	0.717	0.946	0.834	0.125818
A0A452EM26	LY6/PLAUR domain containing 6B(predicted) OS=Capra hircus OX=9925 GN=LYPD6B PE=4 SV=1	LYPD6B	21.053	8.1	1	1	1	1.112	1.093	1.282	1.24	1.153	0.867	0.748	1.238	0.912	0.862	0.787	0.021744
A0A452EM32	Superoxide dismutase [Cu-Zn] OS=Capra hircus OX=9925 GN=SOD1 PE=4 SV=1	SOD1	15.933	41.6	6	40	1	0.939	0.979	0.772	1.131	1.427	0.965	1.012	0.877	1.079	1.201	0.978	0.9577
A0A452EM66	NAD(P)H dehydrogenase, quinone 2(predicted) OS=Capra hircus OX=9925 GN=NQO2 PE=4 SV=1	NQO2	25.707	41.2	8	10	8	0.955	0.794	0.877	1.006	0.759	1.484	1.314	1.065	1.067	1.065	1.365	0.0077765
A0A452EM71	C1QTNF5 protein(predicted) OS=Capra hircus OX=9925 GN=C1QTNF5 PE=4 SV=1	C1QTNF5	25.349	41.2	12	52	12	1.11	1.142	0.983	1.084	1.045	0.791	0.878	1.366	1.009	0.935	0.928	0.39686
A0A452EMA0	Proteasome subunit alpha type(predicted) OS=Capra hircus OX=9925 GN=PSMA7 PE=4 SV=1	PSMA7	27.869	36.3	8	15	5	1.188	1.042	0.872	1.097	1.087	1.269	0.968	0.834	0.97	0.967	0.947	0.51236
A0A452EMD6	Pancreatic secretory granule membrane major glycoprotein GP2(predicted) OS=Capra hircus OX=9925 GN=GP2 PE=4 SV=1	GP2	60.172	6.4	3	3	3	0.716	1.807	0.691	0.851	2.498	0.8	0.803	0.954	0.673	0.803	0.615	0.26286
A0A452EME5	Nucleoside diphosphate kinase-like protein 5(predicted) OS=Capra hircus OX=9925 GN=NME5 PE=4 SV=1	NME5	23.751	10	2	2	2
A0A452EMF7	HD domain-containing protein 2(predicted) OS=Capra hircus OX=9925 GN=HDDC2 PE=4 SV=1	HDDC2	23.276	72.2	11	28	11	0.917	1.012	0.639	0.894	1.09	1.613	1.121	0.897	0.941	1.145	1.256	0.147561
A0A452EMI3	Solute carrier family 38 member 10(predicted) OS=Capra hircus OX=9925 GN=SLC38A10 PE=4 SV=1	SLC38A10	115.2	25.6	17	25	17	0.785	1.073	0.988	0.819	1.015	1.095	1.245	1.164	1.048	1.048	1.197	0.030117
A0A452EMJ0	Serine/threonine-protein phosphatase PP1-gamma catalytic subunit(predicted) OS=Capra hircus OX=9925 GN=PPP1CC PE=4 SV=1	PPP1CC	35.92	38.5	14	27	3	1.12	0.966	0.962	1.052	1.104	1.134	0.961	0.928	0.939	1.155	0.983	0.74502
A0A452EMJ7	Protein ABHD16A(predicted) OS=Capra hircus OX=9925 GN=ABHD16A PE=4 SV=1	ABHD16A	63.299	1.4	1	1	1
A0A452EMK5	Choline kinase alpha(predicted) OS=Capra hircus OX=9925 GN=CHKA PE=4 SV=1	CHKA	52.063	3.1	1	2	1	0.821	1.003	0.973	0.812	0.733	1.199	1.04	1.357	1.273	1.264	1.412	0.0015428
A0A452EML3	Pyrroline-5-carboxylate reductase(predicted) OS=Capra hircus OX=9925 PE=4 SV=1	---	8.4719	14.1	1	1	1	1.07	0.712	1.389	1.121	0.741	0.686	1.243	1.205	1.223	1.073	1.079	0.62864
A0A452EMN2	Sperm associated antigen 17(predicted) OS=Capra hircus OX=9925 GN=SPAG17 PE=4 SV=1	SPAG17	214.03	3.7	7	7	7	1.397	1.16	1.007	1.199	1.491	0.838	0.726	0.837	0.85	0.919	0.667	0.00102421
A0A452EMQ1	Target of myb1 (Chicken)-like 1(predicted) OS=Capra hircus OX=9925 GN=TOM1L1 PE=4 SV=1	TOM1L1	52.592	5.3	2	3	2	1.146	0.923	0.54	1.133	0.9	0.973	1.404	1.072	1.121	1.186	1.24	0.145098
A0A452EMR2	Testis anion transporter 1(predicted) OS=Capra hircus OX=9925 GN=SLC26A8 PE=4 SV=1	SLC26A8	103.26	3.1	3	4	3	1.305	1.165	1.257	1.182	1.349	0.759	0.744	0.992	0.777	0.935	0.672	0.00027773
A0A452EMU5	Homeobox protein Hox-D12(predicted) OS=Capra hircus OX=9925 GN=HOXD12 PE=4 SV=1	HOXD12	29.099	3	1	1	1	1.074	0.952	0.825	1.047	0.872	0.862	1.082	1.339	1.263	1.142	1.192	0.100917
A0A452EMY5	Fibrinogen gamma-B chain(predicted) OS=Capra hircus OX=9925 GN=FGG PE=4 SV=1	FGG	48.949	30.7	16	23	16	0.81	0.814	3.447	0.722	0.784	0.506	0.558	1.209	1.042	0.692	0.609	0.36338
A0A452EMZ1	60S ribosomal protein L36(predicted) OS=Capra hircus OX=9925 GN=RPL36 PE=4 SV=1	RPL36	12.224	9.5	1	1	1	1.46	0.989	0.819	1.991	0.742	0.895	0.883	0.959	0.852	0.854	0.74	0.28322
A0A452EN08	Cytochrome c oxidase subunit 7A1, mitochondrial(predicted) OS=Capra hircus OX=9925 GN=COX7A1 PE=4 SV=1	COX7A1	9.0284	16.2	1	1	1	2.162	0.833	1.104	1.873	1.02	0.502	0.668	0.638	0.849	0.758	0.488	0.0116647
A0A452EN12	S-methyl-5'-thioadenosine phosphorylase(predicted) OS=Capra hircus OX=9925 GN=MTAP PE=4 SV=1	MTAP	31.24	15.2	3	4	3	0.907	0.921	1.01	1.023	1.083	1.092	1.048	1.077	1.113	1.163	1.111	0.021944
A0A452EN27	COP9 signalosome complex subunit 4(predicted) OS=Capra hircus OX=9925 GN=COPS4 PE=4 SV=1	COPS4	46.284	26.8	9	10	9	0.984	0.967	0.884	1.024	0.919	1.344	1.181	1.029	0.958	1.084	1.171	0.044299
A0A452EN55	importin subunit beta-1(predicted) OS=Capra hircus OX=9925 GN=KPNB1 PE=4 SV=1	KPNB1	97.226	10	7	7	7	1.151	0.946	0.843	1.066	1.044	1.879	0.818	0.95	0.947	0.696	1.048	0.94978
A0A452EN56	Alpha-mannosidase(predicted) OS=Capra hircus OX=9925 GN=LOC102171400 PE=4 SV=1	LOC102171400	113.06	15.1	13	38	3	0.893	0.796	0.821	0.963	0.832	1.164	1.696	0.899	0.926	1.029	1.327	0.09898
A0A452EN63	Fibrinogen beta chain OS=Capra hircus OX=9925 GN=FGB PE=4 SV=1	FGB	54.468	30.5	13	4	4	0.861	0.816	3.001	0.984	0.905	0.607	0.691	1.137	0.842	0.803	0.621	0.2235
A0A452EN71	colipase-like protein 2(predicted) OS=Capra hircus OX=9925 GN=CLPSL2 PE=4 SV=1	CLPSL2	10.086	19.4	2	2	2	0.867	0.967	1.411	0.955	0.957	0.794	0.989	1.678	0.988	0.959	1.049	0.8536
A0A452EN76	dehydrogenase/reductase SDR family member 11(predicted) OS=Capra hircus OX=9925 GN=DHRS11 PE=4 SV=1	DHRS11	35.76	52.1	14	18	14	1.013	0.897	0.877	0.975	1.028	1.341	1.181	0.966	0.999	1.162	1.179	0.046275
A0A452EN77	Receptor-type tyrosine-protein phosphatase F(predicted) OS=Capra hircus OX=9925 GN=PTPRF PE=4 SV=1	PTPRF	211.59	0.8	1	1	1
A0A452EN82	ATP synthase subunit alpha(predicted) OS=Capra hircus OX=9925 GN=ATP5F1A PE=4 SV=1	ATP5F1A	60.791	23.8	13	19	13	1.254	0.968	1.103	1.135	0.887	0.842	0.981	0.759	0.766	1.119	0.835	0.093683
A0A452ENA9	Dynactin subunit 3(predicted) OS=Capra hircus OX=9925 GN=DCTN3 PE=4 SV=1	DCTN3	21.158	13.4	3	4	3	0.934	0.988	0.663	1.03	0.824	0.77	1.5	1.156	1.139	1.394	1.342	0.080036
A0A452ENB2	PLAA protein(predicted) OS=Capra hircus OX=9925 GN=PLAA PE=4 SV=1	PLAA	87.116	20.2	12	15	12	0.891	0.839	1.124	0.987	0.925	1.099	0.944	1.138	1.085	1.097	1.125	0.07666
A0A452ENB4	Cardiotrophin 1(predicted) OS=Capra hircus OX=9925 GN=CTF1 PE=4 SV=1	CTF1	21.125	4.5	1	1	1	0.885	0.901	1.137	0.829	1.034	1.074	1.015	1.357	1.199	1.059	1.192	0.053045
A0A452ENB6	Complement component C9(predicted) OS=Capra hircus OX=9925 GN=C9 PE=4 SV=1	C9	61.975	10	5	5	5	0.832	1.046	1.736	0.818	1.161	0.743	1.011	1.429	0.921	0.813	0.879	0.53288
A0A452ENC5	Membrane primary amine oxidase(predicted) OS=Capra hircus OX=9925 PE=4 SV=1	---	75.622	16.8	11	49	0
A0A452END8	Ribosomal protein S23, isoform CRA_a(predicted) OS=Capra hircus OX=9925 GN=RPS23 PE=4 SV=1	RPS23	15.807	13.3	2	2	2	0.972	0.882	0.876	1.204	0.961	1.253	1.193	1.105	1.154	0.851	1.135	0.197656
A0A452ENF6	Disintegrin and metalloproteinase domain-containing protein 18 (Fragment)(predicted) OS=Capra hircus OX=9925 GN=ADAM18 PE=4 SV=1	ADAM18	77.551	22.5	15	19	15	1.004	0.885	0.748	0.99	1.085	1.409	1.189	0.941	1.019	1.033	1.187	0.1172
A0A452ENG3	Serine/threonine-protein phosphatase(predicted) OS=Capra hircus OX=9925 GN=PPP3CC PE=4 SV=1	PPP3CC	57.347	24.5	11	16	11	0.855	0.97	0.857	0.922	1.045	1.043	1.199	0.887	1.084	1.282	1.182	0.05916
A0A452ENH1	DNA damage-binding protein 1(predicted) OS=Capra hircus OX=9925 GN=DDB1 PE=4 SV=1	DDB1	126.93	17.7	18	20	18	0.998	1.021	0.904	1.101	1.014	1.33	1.096	0.92	0.924	1.078	1.062	0.50384
A0A452ENI2	Syntaxin-7(predicted) OS=Capra hircus OX=9925 GN=STX7 PE=4 SV=1	STX7	29.656	13	3	4	3	1.057	1.025	1.068	1.099	1.16	1.26	0.929	0.941	1.105	0.878	0.945	0.4076
A0A452ENI4	Ropporin-1(predicted) OS=Capra hircus OX=9925 GN=ROPN1 PE=4 SV=1	ROPN1	23.933	39.2	7	16	7	1.629	1.334	1.039	1.413	1.461	0.738	0.684	0.887	0.708	0.683	0.538	0.00012366
A0A452ENL1	Acrosin inhibitor 1 (Fragment)(predicted) OS=Capra hircus OX=9925 PE=4 SV=1	---	7.5613	90.5	8	27	8	0.327	0.377	0.322	0.401	0.259	0.951	1.683	4.054	0.398	1.785	5.262	0.023039
A0A452ENL9	Methyltransferase-like protein 9(predicted) OS=Capra hircus OX=9925 GN=METTL9 PE=4 SV=1	METTL9	36.536	16.4	5	7	5	0.879	0.927	1.044	0.892	0.863	0.934	1.082	1.487	1.095	1.119	1.241	0.037461
A0A452ENP8	DnaJ-like protein subfamily B member 11(predicted) OS=Capra hircus OX=9925 GN=DNAJB11 PE=4 SV=1	DNAJB11	40.503	8.9	3	3	3	0.965	0.669	0.812	1.015	0.703	0.607	0.948	1.489	2.059	1.176	1.508	0.161959
A0A452ENQ2	Ubiquitin like modifier activating enzyme 3(predicted) OS=Capra hircus OX=9925 GN=UBA3 PE=4 SV=1	UBA3	52.818	28.2	9	13	9	0.818	0.837	0.759	0.836	0.812	1.25	1.409	1.078	1.141	1.329	1.528	4.0353e-05
A0A452ENU2	Glucose-6-phosphate 1-dehydrogenase(predicted) OS=Capra hircus OX=9925 GN=G6PD PE=4 SV=1	G6PD	59.336	6.4	3	3	3	1.088	1.071	1.08	1.162	1.082	1.168	0.775	0.871	1.226	0.91	0.903	0.25908
A0A452ENW5	Beta-defensin(predicted) OS=Capra hircus OX=9925 PE=4 SV=1	---	10.593	35.1	5	7	5	0.661	0.665	0.647	0.834	0.706	2.066	1.402	1.157	1.166	1.081	1.956	0.00091959
A0A452EP08	Cathepsin O(predicted) OS=Capra hircus OX=9925 GN=CTSO PE=4 SV=1	CTSO	34.335	2.9	1	2	1	1.066	0.945	1.356	0.864	1.27	0.719	0.719	1.356	1.201	1.005	0.909	0.4833
A0A452EP29	Osteopontin(predicted) OS=Capra hircus OX=9925 GN=SPP1 PE=4 SV=1	SPP1	29.784	39.5	9	20	9	0.893	1.248	0.99	1.119	1.195	1.441	0.528	1.666	0.596	0.65	0.896	0.42514
A0A452EP39	NADH-ubiquinone oxidoreductase 75 kDa subunit, mitochondrial (Fragment)(predicted) OS=Capra hircus OX=9925 GN=NDUFS1 PE=4 SV=1	NDUFS1	76.585	2.7	2	2	2
A0A452EP46	60S ribosomal protein L6(predicted) OS=Capra hircus OX=9925 GN=RPL6 PE=4 SV=1	RPL6	32.713	5.9	2	2	2	1.558	0.932	0.903	1.879	0.885	0.918	0.791	0.753	0.924	0.871	0.691	0.122363
A0A452EP47	Chromosome 1 open reading frame 50(predicted) OS=Capra hircus OX=9925 GN=C1orf50 PE=4 SV=1	C1orf50	22.408	20.1	3	4	3	1.017	0.83	1.025	0.991	1.155	1.339	1.227	0.863	1.024	1.001	1.087	0.43942
A0A452EP50	Ubiquilin 1(predicted) OS=Capra hircus OX=9925 GN=UBQLN1 PE=4 SV=1	UBQLN1	61.172	11.3	5	7	5	0.885	0.948	0.911	1.045	1.088	1.254	1.127	0.913	1.058	1.274	1.154	0.093018
A0A452EP55	Putative aspartate aminotransferase, cytoplasmic 2(predicted) OS=Capra hircus OX=9925 GN=GOT1L1 PE=4 SV=1	GOT1L1	45.658	5.7	2	2	2
A0A452EP73	WAP four-disulfide core domain 11(predicted) OS=Capra hircus OX=9925 GN=WFDC11 PE=4 SV=1	WFDC11	10.36	16.9	1	1	1
A0A452EP87	Biotinidase(predicted) OS=Capra hircus OX=9925 GN=BTD PE=4 SV=1	BTD	56.231	28.4	13	27	13	0.882	1.041	1.096	0.868	1.065	0.992	1.055	1.218	1.067	0.985	1.074	0.27608
A0A452EPB0	Aldose 1-epimerase(predicted) OS=Capra hircus OX=9925 GN=GALM PE=4 SV=1	GALM	37.585	29.8	8	14	8	0.948	0.966	0.775	0.963	0.956	1.259	1.428	0.923	1.064	1.147	1.263	0.029223
A0A452EPB5	Dynein intermediate chain 1, axonemal(predicted) OS=Capra hircus OX=9925 GN=DNAI1 PE=4 SV=1	DNAI1	79.726	12	7	7	7	1.633	1.14	0.775	1.377	1.278	0.957	0.717	0.627	0.682	0.725	0.598	0.008677
A0A452EPB9	elongin-C isoform X2(predicted) OS=Capra hircus OX=9925 GN=ELOC PE=4 SV=1	ELOC	12.473	8.9	1	1	1
A0A452EPC6	Immunoglobulin heavy constant mu(predicted) OS=Capra hircus OX=9925 PE=4 SV=1	---	52.99	27.3	9	9	5	1.004	1.041	1.529	0.998	1.295	0.765	1.135	1.13	0.835	0.666	0.772	0.086224
A0A452EPE5	Glucosamine-6-phosphate isomerase(predicted) OS=Capra hircus OX=9925 GN=GNPDA1 PE=4 SV=1	GNPDA1	32.557	49.1	11	18	8	1.11	1.112	0.906	1.134	1.111	1.277	1.013	0.754	0.929	0.997	0.925	0.37414
A0A452EPH7	Phosphoglycerate mutase(predicted) OS=Capra hircus OX=9925 GN=BPGM PE=4 SV=1	BPGM	30.08	22	7	8	7	0.713	0.841	0.792	0.788	0.781	1.626	1.273	1.029	1.02	1.458	1.636	0.0078179
A0A452EPJ7	TSC22 domain family protein 2(predicted) OS=Capra hircus OX=9925 GN=TSC22D2 PE=4 SV=1	TSC22D2	74.775	3.5	3	3	1	1.075	0.817	0.9	1.182	0.947	1.302	1.172	1.156	0.872	1.039	1.126	0.24446
A0A452EPK0	transcription elongation factor B polypeptide 2(predicted) OS=Capra hircus OX=9925 GN=ELOB PE=4 SV=1	ELOB	13.17	28.8	4	4	4	0.993	0.782	0.907	0.986	0.79	1.591	1.207	1.192	0.965	0.946	1.324	0.037697
A0A452EPK3	Spectrin beta chain, non-erythrocytic 1 OS=Capra hircus OX=9925 GN=SPTBN1 PE=4 SV=1	SPTBN1	272.69	0.7	2	2	2
A0A452EPM2	Coilin(predicted) OS=Capra hircus OX=9925 GN=COIL PE=4 SV=1	COIL	63.11	1.8	1	1	1	1.396	0.988	1.481	1.238	1.196	0.659	0.749	0.886	0.888	0.969	0.659	0.0028838
A0A452EPV3	Threonine--tRNA ligase 2, cytoplasmic(predicted) OS=Capra hircus OX=9925 GN=TARSL2 PE=4 SV=1	TARSL2	82.876	1.2	1	1	1	1.416	0.776	0.649	2.014	0.595	1.029	0.907	1.129	0.842	1.09	0.917	0.92408
A0A452EPV8	Platelet-derived growth factor subunit A(predicted) OS=Capra hircus OX=9925 GN=PDGFA PE=4 SV=1	PDGFA	22.188	52	11	13	11	0.834	1.197	1.124	0.843	1.065	0.681	1.157	1.471	1.014	1.072	1.066	0.76662
A0A452EPW1	NAD-dependent protein deacetylase(predicted) OS=Capra hircus OX=9925 GN=SIRT3 PE=4 SV=1	SIRT3	36.894	14.4	3	4	3	1.15	1.314	1.061	1.04	1.165	0.833	0.783	0.847	0.836	1.263	0.796	0.036299
A0A452EPW9	CD5L(predicted) OS=Capra hircus OX=9925 PE=4 SV=1	---	39.36	37.6	14	19	9	0.452	1.892	1.617	0.477	1.458	1.284	0.261	1.201	0.501	1.333	0.777	0.5876
A0A452EPX1	Serine protease HTRA1(predicted) OS=Capra hircus OX=9925 GN=HTRA1 PE=4 SV=1	HTRA1	50.788	28.1	14	20	14	0.969	0.779	1.618	0.884	0.869	0.8	1.322	1.058	1.047	1.031	1.027	0.7465
A0A452EPX6	AHNAK nucleoprotein(predicted) OS=Capra hircus OX=9925 GN=AHNAK PE=4 SV=1	AHNAK	564.33	2.2	2	3	2	0.8	1.048	1.785	0.88	1.077	0.779	0.902	1.132	0.916	1.064	0.857	0.4543
A0A452EPY9	Abhydrolase domain containing 10 OS=Capra hircus OX=9925 GN=ABHD10 PE=4 SV=1	ABHD10	34.137	37.3	10	12	10	1.319	0.971	1.03	1.225	1.06	0.981	0.781	0.864	0.905	1.282	0.859	0.152258
A0A452EQ00	3-phosphoinositide-dependent protein kinase 1-like(predicted) OS=Capra hircus OX=9925 GN=PDPK1 PE=4 SV=1	PDPK1	62.904	3.1	2	2	2	0.87	0.713	0.749	0.897	0.832	1.303	1.624	1.003	1.047	1.352	1.558	0.0023618
A0A452EQ11	Cytochrome b-c1 complex subunit 1, mitochondrial(predicted) OS=Capra hircus OX=9925 GN=UQCRC1 PE=4 SV=1	UQCRC1	52.867	10.6	5	6	5	1.5	0.765	1.991	1.336	0.746	0.605	0.869	0.912	0.901	0.817	0.648	0.109922
A0A452EQ26	Polycystin family receptor for egg jelly OS=Capra hircus OX=9925 GN=PKDREJ PE=4 SV=1	PKDREJ	235.83	3.4	6	6	6	1.328	1.163	1.681	1.407	1.355	0.582	0.652	0.728	0.761	0.763	0.503	2.2123e-05
A0A452EQ37	60S ribosomal protein L5 isoform X2(predicted) OS=Capra hircus OX=9925 GN=RPL5 PE=4 SV=1	RPL5	34.213	13.5	3	3	3	1.164	0.92	1.137	1.482	0.857	0.808	0.94	1.167	1.128	0.871	0.884	0.36808
A0A452EQ58	Chromosome 8 C18orf54 homolog(predicted) OS=Capra hircus OX=9925 PE=4 SV=1	---	52.948	1.9	1	1	1
A0A452EQ72	Hypothetical LOC539526(predicted) OS=Capra hircus OX=9925 GN=SAXO1 PE=4 SV=1	SAXO1	49.646	5.3	2	2	2	1.6	1.633	0.67	1.488	1.44	0.666	0.641	0.888	0.753	0.665	0.529	0.0100978
A0A452EQ85	40S ribosomal protein S12(predicted) OS=Capra hircus OX=9925 GN=RPS12 PE=4 SV=1	RPS12	15.221	30.7	4	6	4	1.656	0.867	0.806	2.056	0.804	1.173	0.704	0.708	0.841	0.643	0.657	0.151639
A0A452EQA5	Importin 9(predicted) OS=Capra hircus OX=9925 GN=IPO9 PE=4 SV=1	IPO9	114.94	2.4	2	2	2
A0A452EQF0	Cytochrome b-c1 complex subunit Rieske, mitochondrial(predicted) OS=Capra hircus OX=9925 GN=UQCRFS1 PE=4 SV=1	UQCRFS1	29.53	3.3	1	1	1	1.738	0.737	2.256	1.455	0.761	0.642	0.715	0.623	0.757	0.79	0.508	0.062658
A0A452EQJ6	neural cell adhesion molecule L1-like protein isoform X3(predicted) OS=Capra hircus OX=9925 GN=CHL1 PE=4 SV=1	CHL1	130.25	1.5	1	1	1	1.1	1.095	1.051	0.928	1.275	0.865	0.968	1.342	0.9	0.971	0.926	0.3895
A0A452EQL8	Pentaxin(predicted) OS=Capra hircus OX=9925 GN=CRP PE=4 SV=1	CRP	25.046	39.4	9	17	9	1.261	1.064	1.165	1.281	1.034	0.897	0.848	1.536	0.84	0.56	0.806	0.186716
A0A452EQN7	Calcium-regulated heat stable protein 1(predicted) OS=Capra hircus OX=9925 GN=CARHSP1 PE=4 SV=1	CARHSP1	15.861	27.9	5	6	5	0.911	0.871	0.765	0.929	0.885	1.356	1.173	0.975	1.053	0.979	1.269	0.011299
A0A452EQQ5	S-phase kinase-associated protein 1 isoform X1(predicted) OS=Capra hircus OX=9925 GN=SKP1 PE=4 SV=1	SKP1	18.658	52.8	7	9	7	1.124	0.999	0.781	1.216	0.956	1.304	1.072	0.899	0.93	0.987	1.023	0.8124
A0A452EQV1	Leucine carboxyl methyltransferase 1(predicted) OS=Capra hircus OX=9925 GN=LCMT1 PE=4 SV=1	LCMT1	38.009	27.4	8	8	8	0.845	0.837	0.69	0.906	0.836	1.791	1.3	0.967	1.149	1.19	1.555	0.0051638
A0A452EQX6	Acyl-CoA-binding protein(predicted) OS=Capra hircus OX=9925 GN=DBI PE=4 SV=1	DBI	10.04	62.1	7	36	7	0.928	0.903	0.595	0.983	0.873	1.536	1.31	0.836	1.005	1.159	1.365	0.058465
A0A452EQY2	Dolichyl-diphosphooligosaccharide--protein glycosyltransferase 48 kDa subunit(predicted) OS=Capra hircus OX=9925 GN=DDOST PE=4 SV=1	DDOST	48.777	1.8	1	1	1	0.847	1.099	1.163	1.094	0.84	0.786	0.861	1.193	1.385	1.187	1.073	0.66482
A0A452EQZ4	Malate dehydrogenase (Fragment)(predicted) OS=Capra hircus OX=9925 GN=MDH1 PE=4 SV=1	MDH1	35.855	46.2	17	35	17	1.102	1.02	0.888	1.04	1.117	1.247	1.116	0.821	0.894	1.113	1.005	0.96518
A0A452ER37	26S proteasome regulatory subunit 7(predicted) OS=Capra hircus OX=9925 GN=PSMC2 PE=4 SV=1	PSMC2	48.633	67.2	27	38	27	0.873	0.831	0.736	0.871	0.771	1.362	1.408	1.021	1.162	1.289	1.529	0.00025742
A0A452ER44	Geranylgeranyl pyrophosphate synthase(predicted) OS=Capra hircus OX=9925 GN=GGPS1 PE=4 SV=1	GGPS1	34.9	3.7	1	1	1
A0A452ER52	Electron transfer flavoprotein subunit alpha, mitochondrial(predicted) OS=Capra hircus OX=9925 GN=ETFA PE=4 SV=1	ETFA	34.987	42.9	11	18	11	1.242	0.952	1.005	1.069	0.997	1.138	0.967	0.875	0.951	1.16	0.967	0.6359
A0A452ER57	Laminin subunit beta-2(predicted) OS=Capra hircus OX=9925 GN=LAMB2 PE=4 SV=1	LAMB2	195.97	2.1	3	3	3	0.957	1.152	1.121	1.236	1.073	0.877	0.981	1.049	1.006	0.958	0.879	0.040485
A0A452ER71	Endoplasmic reticulum membrane sensor NFE2L1(predicted) OS=Capra hircus OX=9925 GN=NFE2L1 PE=4 SV=1	NFE2L1	67.66	1.5	1	1	1
A0A452ERA9	TTC25 protein(predicted) OS=Capra hircus OX=9925 GN=TTC25 PE=4 SV=1	TTC25	74.812	6.3	4	5	4	1.1	1.317	0.912	1.099	1.427	0.667	0.646	0.825	0.803	0.94	0.663	0.0045786
A0A452ERB9	Growth arrest specific 6(predicted) OS=Capra hircus OX=9925 GN=GAS6 PE=4 SV=1	GAS6	73.799	20.3	11	15	11	0.939	1.504	0.942	0.972	1.337	0.736	0.888	1.203	1.095	0.76	0.822	0.20104
A0A452ERC8	Ribonuclease inhibitor (Fragment)(predicted) OS=Capra hircus OX=9925 GN=RNH1 PE=4 SV=1	RNH1	48.941	10.1	3	3	3	0.881	1.023	1.089	1.037	0.848	1.02	0.886	1.203	0.952	1.117	1.062	0.4486
A0A452ERE8	Serine peptidase inhibitor, Kunitz type 4(predicted) OS=Capra hircus OX=9925 PE=4 SV=1	---	13.714	35.2	7	43	7	0.902	0.799	0.716	0.848	0.894	1.831	1.679	0.928	0.952	0.824	1.494	0.111276
A0A452ERJ6	LanC-like protein 1 (Fragment)(predicted) OS=Capra hircus OX=9925 GN=LANCL1 PE=4 SV=1	LANCL1	45.357	12.5	4	4	4	1.031	1.05	0.979	1.298	1.166	1.116	0.871	0.817	1.051	1.043	0.887	0.157862
A0A452ERK1	Guanine nucleotide-binding protein subunit gamma(predicted) OS=Capra hircus OX=9925 GN=GNG12 PE=4 SV=1	GNG12	8.0572	15.3	1	1	1	0.958	1.157	0.756	1.063	1.393	1.226	0.74	1.285	1.125	0.785	0.969	0.81432
A0A452ERL1	Proteasomal ubiquitin receptor ADRM1(predicted) OS=Capra hircus OX=9925 GN=ADRM1 PE=4 SV=1	ADRM1	41.954	15.2	5	13	5	0.742	0.923	0.748	0.845	0.909	1.426	1.286	0.995	1.109	1.315	1.471	0.00134359
A0A452ERM2	AARS protein(predicted) OS=Capra hircus OX=9925 GN=AARS PE=4 SV=1	AARS	102.54	10	8	8	8	1.156	0.644	0.748	1.432	0.711	1.403	1.315	0.964	0.963	1.03	1.21	0.22938
A0A452ERM8	NADH dehydrogenase [ubiquinone] flavoprotein 2, mitochondrial(predicted) OS=Capra hircus OX=9925 GN=NDUFV2 PE=4 SV=1	NDUFV2	27.369	18.1	4	5	4	1.629	1.052	1.139	1.651	1.148	0.833	0.73	0.754	0.752	0.895	0.599	0.00137513
A0A452ERN5	Tetraspanin(predicted) OS=Capra hircus OX=9925 GN=CD82 PE=4 SV=1	CD82	29.406	8.3	2	2	2	1.236	1.202	1.291	1.202	1.315	0.932	0.718	1.102	0.793	0.714	0.682	0.0096846
A0A452ERR6	Glycosylphosphatidylinositol anchored molecule like protein(predicted) OS=Capra hircus OX=9925 GN=GML PE=4 SV=1	GML	17.988	37.7	8	21	8	1.238	0.907	1.237	1.232	1.233	0.879	0.921	0.786	0.82	1.009	0.755	0.0063577
A0A452ERW8	Dihydrolipoyllysine-residue succinyltransferase component of 2-oxoglutarate dehydrogenase complex, mitochondrial(predicted) OS=Capra hircus OX=9925 GN=DLST PE=4 SV=1	DLST	48.942	18.5	9	9	9	2.274	1.058	1.312	1.896	0.82	0.602	0.77	0.718	0.691	0.683	0.471	0.022537
A0A452ES10	Dystroglycan(predicted) OS=Capra hircus OX=9925 GN=DAG1 PE=4 SV=1	DAG1	95.721	14.6	11	28	11	0.672	1.133	1.348	0.648	1.027	0.811	1.239	1.496	1.158	0.885	1.158	0.40132
A0A452ES29	Protein canopy-like protein 3(predicted) OS=Capra hircus OX=9925 GN=CNPY3 PE=4 SV=1	CNPY3	31.435	14.2	5	5	5	0.982	1.268	1.084	0.972	1.015	0.74	0.811	1.217	1.024	1.346	0.966	0.66494
A0A452ES30	Hypoxanthine phosphoribosyltransferase(predicted) OS=Capra hircus OX=9925 GN=HPRT1 PE=4 SV=1	HPRT1	24.394	26	5	6	5	1.2	1.054	0.939	1.188	1.213	1.086	0.944	0.845	1.111	1.006	0.892	0.143302
A0A452ES46	Xaa-Pro dipeptidase (Fragment)(predicted) OS=Capra hircus OX=9925 GN=PEPD PE=4 SV=1	PEPD	54.98	27	12	17	12	1.009	1.022	1.009	1.15	1.132	1.17	0.999	0.774	0.919	1.003	0.914	0.22318
A0A452ES57	DnaJ-like protein subfamily B member 4 (Fragment)(predicted) OS=Capra hircus OX=9925 GN=DNAJB4 PE=4 SV=1	DNAJB4	37.822	18.1	5	5	5	1.07	0.871	0.92	0.973	0.893	1.039	1.05	1.024	1.114	1.33	1.176	0.029957
A0A452ES61	TSC22 domain family protein 4 isoform X3(predicted) OS=Capra hircus OX=9925 GN=C7orf61 PE=4 SV=1	C7orf61	23.354	24	4	5	4	1.564	1.077	1.668	1.431	1.047	0.594	0.714	0.81	0.699	0.651	0.511	0.000304
A0A452ES88	Leucine rich colipase like 1(predicted) OS=Capra hircus OX=9925 GN=LRCOL1 PE=4 SV=1	LRCOL1	17.938	8.9	1	1	1
A0A452ESA5	Serine protease 45(predicted) OS=Capra hircus OX=9925 PE=4 SV=1	---	35.195	19.9	6	6	6	1.113	0.763	0.896	1.185	0.854	1.371	1.226	1.067	1.049	0.938	1.175	0.155616
A0A452ESB8	ARP3 actin related protein 3 homolog(predicted) OS=Capra hircus OX=9925 GN=ACTR3 PE=4 SV=1	ACTR3	46.139	14.6	5	5	5	0.897	0.892	0.928	0.885	0.919	1.457	1.163	1.025	1.05	1.016	1.263	0.030415
A0A452ESC5	Cylicin-1(predicted) OS=Capra hircus OX=9925 GN=CYLC1 PE=4 SV=1	CYLC1	62.09	31.1	14	18	14	2.337	1.171	0.974	1.994	1.381	0.275	0.346	0.319	0.454	0.344	0.221	4.0739e-05
A0A452ESE0	Signal-regulatory protein delta(predicted) OS=Capra hircus OX=9925 GN=LOC102171800 PE=4 SV=1	LOC102171800	31.435	15	5	7	5	1.723	1.362	1.053	1.425	1.532	0.782	0.601	0.505	0.707	0.671	0.46	0.000117048
A0A452ESG4	guanine nucleotide-binding protein subunit beta-2-like 1(predicted) OS=Capra hircus OX=9925 GN=RACK1 PE=4 SV=1	RACK1	35.076	24.3	6	7	6	1.454	0.85	0.843	1.869	0.936	1.1	0.724	0.864	0.9	0.745	0.728	0.160756
A0A452ESH2	Sperm associated antigen 11 isoform E(predicted) OS=Capra hircus OX=9925 GN=LOC102187559 PE=4 SV=1	LOC102187559	9.1906	61.2	7	14	7	0.812	0.96	0.547	0.893	1.108	0.899	1.221	1.111	1.117	1.224	1.29	0.070222
A0A452ESH4	Glycerol kinase(predicted) OS=Capra hircus OX=9925 GN=LOC102184853 PE=4 SV=1	LOC102184853	60.138	32.2	16	26	9	1.926	1.272	1.056	2.036	1.286	0.472	0.572	0.597	0.606	0.593	0.375	0.00011625
A0A452ESL2	BRI3BP protein(predicted) OS=Capra hircus OX=9925 GN=BRI3BP PE=4 SV=1	BRI3BP	26.923	8.3	2	3	2	1.44	0.761	1.089	0.942	0.772	0.636	0.803	1.447	1.275	1.314	1.094	0.7308
A0A452ESL5	V-type proton ATPase subunit G(predicted) OS=Capra hircus OX=9925 GN=ATP6V1G1 PE=4 SV=1	ATP6V1G1	13.724	30.5	2	5	2	0.733	0.898	0.443	0.545	0.756	1.635	1.629	0.936	1.167	1.538	2.046	0.0025822
A0A452ESM6	Actin-related protein 2/3 complex subunit 4(predicted) OS=Capra hircus OX=9925 GN=ARPC4 PE=4 SV=1	ARPC4	20.652	4.5	1	1	1	0.755	0.84	0.89	1.046	0.838	1.634	1.428	0.84	1.016	1.118	1.382	0.049963
A0A452ESS4	PGM2 protein (Fragment)(predicted) OS=Capra hircus OX=9925 GN=PGM2 PE=4 SV=1	PGM2	67.256	5	3	4	3	1.08	1.206	1.048	1.129	1.126	1.006	0.87	1.154	0.988	0.94	0.887	0.045961
A0A452EST7	Haloacid dehalogenase-like hydrolase domain-containing protein 2(predicted) OS=Capra hircus OX=9925 GN=HDHD2 PE=4 SV=1	HDHD2	28.51	17.8	4	4	4	1.115	1.027	0.892	1.026	0.962	1.282	0.908	1.008	0.929	1.367	1.094	0.42156
A0A452EST9	ADAM metallopeptidase domain 7(predicted) OS=Capra hircus OX=9925 GN=ADAM7 PE=4 SV=1	ADAM7	87.072	13.2	9	10	9	1.06	0.879	0.796	1.14	1.01	1.603	1.032	0.904	0.967	0.87	1.101	0.56194
A0A452ESU7	Heat shock protein family B member 1 variant 1(predicted) OS=Capra hircus OX=9925 GN=HSPB1 PE=4 SV=1	HSPB1	22.349	27.9	5	5	5	0.851	1.194	1.813	0.729	1.119	0.717	0.704	1.211	0.912	1.239	0.838	0.45616
A0A452ESV0	Maltase-glucoamylase(predicted) OS=Capra hircus OX=9925 GN=MGAM PE=4 SV=1	MGAM	205.82	7	10	11	10	0.938	0.921	1.062	1.002	1.039	0.984	1.089	1.057	1.205	0.949	1.065	0.25896
A0A452ESW5	UDP-N-acetylglucosamine pyrophosphorylase 1(predicted) OS=Capra hircus OX=9925 GN=UAP1 PE=4 SV=1	UAP1	56.958	15.2	7	8	7	0.987	0.883	0.856	1.03	0.889	1.408	1.168	1.082	1.056	1.163	1.265	0.005535
A0A452ESW7	Copper chaperone for superoxide dismutase(predicted) OS=Capra hircus OX=9925 GN=CCS PE=4 SV=1	CCS	28.869	3.3	1	1	1	1.08	1.062	0.722	1.09	1.127	1.33	1.037	0.91	0.761	1.29	1.049	0.7823
A0A452ESY0	HDDC3(predicted) OS=Capra hircus OX=9925 GN=HDDC3 PE=4 SV=1	HDDC3	20.428	18.4	3	4	3	1.105	1.166	1.275	0.967	1.145	0.986	1.001	0.881	0.99	0.927	0.846	0.0122424
A0A452ESY2	Trafficking protein particle complex 3 OS=Capra hircus OX=9925 GN=TRAPPC3 PE=4 SV=1	TRAPPC3	19.559	4.6	1	1	1	0.89	0.85	0.814	0.936	0.854	1.28	1.437	0.978	1.094	1.267	1.394	0.00184133
A0A452ESY8	Mitogen-activated protein kinase kinase kinase(predicted) OS=Capra hircus OX=9925 GN=MAP3K21 PE=4 SV=1	MAP3K21	115.25	1.2	1	1	1	1.223	0.881	1.243	1.234	1.297	1.29	0.868	1.044	0.716	0.696	0.785	0.092001
A0A452ET01	Proteasome subunit beta(predicted) OS=Capra hircus OX=9925 GN=PSMB7 PE=4 SV=1	PSMB7	29.923	22.4	8	17	8	1.164	1.036	0.886	1.129	0.966	1.32	1.02	0.74	0.938	1.021	0.973	0.71458
A0A452ET10	ADAMDEC1 protein (Fragment)(predicted) OS=Capra hircus OX=9925 GN=ADAMDEC1 PE=4 SV=1	ADAMDEC1	45.084	5.3	2	2	2
A0A452ET33	Vacuolar protein sorting-associated protein 11 homolog(predicted) OS=Capra hircus OX=9925 GN=VPS11 PE=4 SV=1	VPS11	107.65	0.7	1	1	1	1.545	0.829	1.794	1.424	0.778	0.821	0.83	1.004	0.802	0.688	0.651	0.067395
A0A452ET55	Triosephosphate isomerase(predicted) OS=Capra hircus OX=9925 GN=TPI1 PE=4 SV=1	TPI1	31.471	68.8	18	32	18	1.053	1.244	1.341	1.092	1.301	0.97	0.796	0.727	0.811	0.887	0.695	0.00073524
A0A452ET62	Fibrous sheath interacting protein 2(predicted) OS=Capra hircus OX=9925 GN=FSIP2 PE=4 SV=1	FSIP2	782.52	2.3	15	18	15	1.468	1.325	1.1	1.285	1.563	0.591	0.618	0.634	0.668	0.706	0.477	2.3255e-06
A0A452ET82	Pyruvate kinase (Fragment)(predicted) OS=Capra hircus OX=9925 GN=PKM PE=4 SV=1	PKM	58.09	52	25	44	3	1.17	1.03	1.362	1.196	0.982	0.773	0.872	0.848	1.096	0.803	0.765	0.012737
A0A452ET92	Carnitine acetyltransferase(predicted) OS=Capra hircus OX=9925 GN=CRAT PE=4 SV=1	CRAT	70.928	19.2	12	18	12	1.329	1.034	0.798	1.095	1.084	1.01	1.049	0.797	0.904	1.273	0.943	0.6193
A0A452ETA1	Epididymis secretory protein Li 1(predicted) OS=Capra hircus OX=9925 GN=YWHAB PE=4 SV=1	YWHAB	28.082	39.8	10	35	5	1.094	1.037	0.851	0.996	1.119	1.033	1.093	0.816	1.155	1.057	1.011	0.9111
A0A452ETA5	Zinc finger C2HC domain-containing protein 1B(predicted) OS=Capra hircus OX=9925 GN=ZC2HC1B PE=4 SV=1	ZC2HC1B	24.301	36.5	5	8	5	0.789	0.667	0.731	0.907	0.71	1.461	1.346	1.083	1.135	1.304	1.664	0.000160351
A0A452ETA7	Clathrin light chain(predicted) OS=Capra hircus OX=9925 GN=CLTA PE=4 SV=1	CLTA	23.322	23.9	6	7	6	0.643	0.614	0.531	0.708	0.55	1.186	2.4	1.071	0.926	1.522	2.333	0.0105776
A0A452ETC0	Carboxypeptidase(predicted) OS=Capra hircus OX=9925 GN=CPVL PE=4 SV=1	CPVL	54.103	17.8	8	12	8	1.382	1.384	1.046	1.103	1.294	0.657	0.895	0.664	0.906	0.944	0.655	0.002536
A0A452ETD5	Postacrosomal sheath WW domain-binding protein(predicted) OS=Capra hircus OX=9925 GN=WBP2NL PE=4 SV=1	WBP2NL	36.084	17.9	4	5	4	1.044	0.922	0.95	1.099	0.913	1.387	1.394	0.709	0.988	1.037	1.119	0.5498
A0A452ETE8	T-complex protein 1 subunit zeta(predicted) OS=Capra hircus OX=9925 GN=CCT6A PE=4 SV=1	CCT6A	57.941	50.7	25	60	12	0.743	0.766	0.636	0.775	0.734	1.596	1.336	0.977	1.142	1.391	1.763	0.00030237
A0A452ETK6	Peroxisomal N(1)-acetyl-spermine/spermidine oxidase(predicted) OS=Capra hircus OX=9925 GN=PAOX PE=4 SV=1	PAOX	56.12	26.4	12	21	12	0.82	0.825	0.799	0.873	0.82	1.466	1.435	0.958	1.042	1.195	1.474	0.0120444
A0A452ETK7	Bifunctional coenzyme A synthase(predicted) OS=Capra hircus OX=9925 GN=COASY PE=4 SV=1	COASY	61.9	12.5	5	5	5	1.075	0.911	0.882	0.988	1.182	0.995	1.097	1.106	0.993	1.162	1.063	0.32902
A0A452ETL9	glyoxylate reductase/hydroxypyruvate reductase-like(predicted) OS=Capra hircus OX=9925 GN=LOC102184018 PE=4 SV=1	LOC102184018	35.665	9.1	2	2	2	0.845	1.035	1.042	1.004	0.9	0.795	1.549	0.941	1.008	1.278	1.154	0.3678
A0A452ETM6	Cilia and flagella associated protein 57(predicted) OS=Capra hircus OX=9925 GN=CFAP57 PE=4 SV=1	CFAP57	144.81	5.2	6	8	6	1.537	1.458	0.783	1.244	1.896	0.675	0.718	0.661	0.607	0.53	0.461	0.00155793
A0A452ETP6	Carboxypeptidase D(predicted) OS=Capra hircus OX=9925 GN=CPD PE=4 SV=1	CPD	152.63	2.4	3	3	3	1.185	0.934	1.039	1.162	1.047	0.804	0.753	1.093	1.123	1.294	0.944	0.52336
A0A452ETR2	Heparan-sulfate 6-O-sulfotransferase(predicted) OS=Capra hircus OX=9925 GN=HS6ST1 PE=4 SV=1	HS6ST1	48.573	7	4	5	4	0.874	1.167	1.263	0.888	1.096	0.908	0.991	1.203	1.161	0.908	0.978	0.8479
A0A452ETU6	Gag(predicted) OS=Capra hircus OX=9925 PE=4 SV=1	---	31.198	4.6	1	1	1	0.786	0.684	1.466	0.856	0.612	0.978	1.599	0.685	0.972	1.717	1.351	0.23602
A0A452ETX9	alpha-2-macroglobulin-like(predicted) OS=Capra hircus OX=9925 GN=LOC102175560 PE=4 SV=1	LOC102175560	165.48	7.9	12	33	1
A0A452ETY7	Intercellular adhesion molecule-1(predicted) OS=Capra hircus OX=9925 GN=ICAM1 PE=4 SV=1	ICAM1	58.209	4.7	3	3	3
A0A452ETZ2	Peroxisomal 3,2-trans-enoyl-CoA isomerase (Fragment)(predicted) OS=Capra hircus OX=9925 GN=ECI2 PE=4 SV=1	ECI2	46.51	27.5	9	16	9	1.181	0.948	0.664	1.004	0.882	1.451	0.921	0.784	0.951	1.365	1.169	0.3686
A0A452EU07	Schlafen like 1(predicted) OS=Capra hircus OX=9925 GN=SLFNL1 PE=4 SV=1	SLFNL1	45.249	4.2	1	1	1	0.761	1.08	0.914	1.076	1.37	0.912	0.916	0.992	1.275	1.114	1.002	0.9193
A0A452EU27	Alpha-2-macroglobulin (Fragment)(predicted) OS=Capra hircus OX=9925 GN=LOC102175560 PE=4 SV=1	LOC102175560	164.54	50.5	76	259	65	0.946	1.103	0.937	0.92	1.336	1.163	1.096	0.8	1.049	0.932	0.961	0.71096
A0A452EU31	Phospholipid-transporting ATPase(predicted) OS=Capra hircus OX=9925 GN=ATP8B3 PE=4 SV=1	ATP8B3	163.81	12.1	17	23	16	1.19	1.008	1.037	1.108	1.191	0.954	0.993	0.869	0.857	1.126	0.867	0.04286
A0A452EU40	Ribosomal protein L23, isoform CRA_b(predicted) OS=Capra hircus OX=9925 GN=RPL23 PE=4 SV=1	RPL23	14.865	27.1	3	3	3	1.288	0.935	0.899	1.706	1.24	0.809	0.805	0.829	0.99	0.909	0.716	0.036603
A0A452EU42	Runt-related transcription factor(predicted) OS=Capra hircus OX=9925 GN=RUNX2 PE=4 SV=1	RUNX2	54.046	1.4	1	4	1	1.597	1.406	1.733	1.392	1.503	0.526	0.53	0.56	0.741	0.47	0.37	1.4042e-06
A0A452EU55	ENO1(predicted) OS=Capra hircus OX=9925 GN=ENO1 PE=4 SV=1	ENO1	47.312	77.4	31	123	24	1.467	1.373	1.264	1.331	1.6	0.685	0.669	0.656	0.688	0.687	0.481	6.217e-05
A0A452EU77	Pyruvate kinase(predicted) OS=Capra hircus OX=9925 GN=PKM PE=4 SV=1	PKM	57.979	53.5	24	40	2	1.005	1.257	1.217	0.947	1.072	1.367	0.865	0.705	1.06	0.933	0.897	0.32838
A0A452EU94	Cytochrome c oxidase assembly protein COX16-like protein, mitochondrial(predicted) OS=Capra hircus OX=9925 GN=COX16 PE=4 SV=1	COX16	9.8523	39.8	3	4	3	0.908	1.288	1.051	0.819	0.911	0.725	1.22	1.58	1.255	1.025	1.166	0.3999
A0A452EU96	Mortality factor 4 like 2(predicted) OS=Capra hircus OX=9925 PE=4 SV=1	---	25.968	4.8	1	1	1
A0A452EUA9	Inositol-1-monophosphatase(predicted) OS=Capra hircus OX=9925 GN=IMPA1 PE=4 SV=1	IMPA1	30.037	41.5	14	27	14	1.04	1.074	0.867	1.053	1.057	1.245	1.048	1.03	0.879	1.078	1.037	0.63846
A0A452EUB7	Filamin-B(predicted) OS=Capra hircus OX=9925 GN=FLNB PE=4 SV=1	FLNB	272.21	8	17	17	17	1.101	1.154	1.125	1.05	1.164	0.929	0.921	0.997	0.964	0.944	0.85	0.000119011
A0A452EUD4	Ester hydrolase C11orf54 homolog(predicted) OS=Capra hircus OX=9925 GN=C11orf54 PE=4 SV=1	C11orf54	35.116	2.5	1	1	1
A0A452EUD9	Carbonic anhydrase 2(predicted) OS=Capra hircus OX=9925 GN=CA2 PE=4 SV=1	CA2	29.13	59.6	12	32	12	1.213	1.148	0.926	1.154	1.174	1.093	0.981	0.812	0.957	0.985	0.86	0.05676
A0A452EUF4	Delta-1-pyrroline-5-carboxylate dehydrogenase, mitochondrial(predicted) OS=Capra hircus OX=9925 GN=ALDH4A1 PE=4 SV=1	ALDH4A1	61.049	12.9	7	9	7	1.276	1.135	0.882	1.102	0.995	1.168	0.849	0.809	0.96	1.119	0.91	0.34048
A0A452EUH4	Bactericidal permeability increasing protein(predicted) OS=Capra hircus OX=9925 GN=BPI PE=4 SV=1	BPI	50.953	26.6	10	14	10	1.077	0.68	0.713	1.125	0.633	1.625	1.276	1.229	1.045	0.73	1.397	0.102982
A0A452EUL4	Coiled-coil domain-containing protein 81(predicted) OS=Capra hircus OX=9925 GN=CCDC81 PE=4 SV=1	CCDC81	76.121	2.4	2	2	2	1.654	1.311	1.29	1.597	1.21	0.693	0.566	0.774	0.641	0.727	0.482	2.0611e-05
A0A452EUR8	Protein CASC1(predicted) OS=Capra hircus OX=9925 GN=CASC1 PE=4 SV=1	CASC1	83.309	4.6	3	4	3	1.245	1.159	1.009	1.1	1.222	0.827	0.907	0.957	0.897	0.96	0.793	0.0011551
A0A452EUS1	Desmoglein 2(predicted) OS=Capra hircus OX=9925 GN=DSG2 PE=4 SV=1	DSG2	121.96	0.8	1	1	1	0.886	1.261	1.354	0.93	1.081	0.732	0.895	1.259	1.23	0.871	0.905	0.4405
A0A452EUS4	aminoacylase-1 isoform X1(predicted) OS=Capra hircus OX=9925 GN=ACY1 PE=4 SV=1	ACY1	45.481	21.8	8	11	8	0.909	1.011	1.066	0.951	1.173	0.937	1.013	1.17	1.026	1.034	1.014	0.79888
A0A452EUU7	Serpine 2 protein(predicted) OS=Capra hircus OX=9925 GN=SERPINE2 PE=4 SV=1	SERPINE2	43.844	54.2	29	101	29	1.004	1.276	1.226	1.002	1.083	0.63	0.845	1.334	1.109	0.86	0.855	0.2165
A0A452EUX2	Peroxiredoxin-6(predicted) OS=Capra hircus OX=9925 GN=PRDX6 PE=4 SV=1	PRDX6	25.095	37.1	9	15	9	0.936	1.058	1.051	0.964	1.122	1.378	1.097	0.863	0.921	0.915	1.008	0.96002
A0A452EUX6	Pepsin A (Fragment)(predicted) OS=Capra hircus OX=9925 GN=LOC102172792 PE=4 SV=1	LOC102172792	41.643	9.3	4	8	4	0.745	0.798	1.097	0.732	0.9	1.876	1.151	1.012	1.208	0.805	1.417	0.077017
A0A452EUX8	Long-chain-fatty-acid--CoA ligase ACSBG2 (Fragment)(predicted) OS=Capra hircus OX=9925 GN=ACSBG2 PE=4 SV=1	ACSBG2	75.033	42.1	25	45	25	0.96	0.892	0.911	0.97	0.952	1.194	1.207	0.917	1.102	1.141	1.187	0.0127619
A0A452EUY4	Fibrous sheath CABYR-binding protein(predicted) OS=Capra hircus OX=9925 GN=FSCB PE=4 SV=1	FSCB	88.055	6.5	6	8	6	1.324	2.198	0.803	1.132	2.524	0.386	0.473	0.287	0.547	0.61	0.289	0.00145953
A0A452EUZ5	Matrix metallopeptidase 2(predicted) OS=Capra hircus OX=9925 GN=MMP2 PE=4 SV=1	MMP2	73.866	20.4	11	17	11	1.471	1.027	0.918	1.401	0.945	0.591	0.545	1.762	1.01	0.703	0.8	0.23678
A0A452EV34	Galactosylgalactosylxylosylprotein 3-beta-glucuronosyltransferase(predicted) OS=Capra hircus OX=9925 GN=B3GAT3 PE=4 SV=1	B3GAT3	37.084	19.4	6	8	6	0.713	1.034	1.228	0.609	0.847	0.833	1.113	1.819	1.336	1.126	1.405	0.0957
A0A452EV37	Osteoglycin(predicted) OS=Capra hircus OX=9925 GN=OGN PE=4 SV=1	OGN	34.16	23.4	8	16	8	0.664	0.92	0.715	0.667	0.884	1.346	1.668	1.263	1.084	1.159	1.694	0.00087819
A0A452EV48	F-box and leucine-rich repeat protein 4(predicted) OS=Capra hircus OX=9925 GN=FBXL4 PE=4 SV=1	FBXL4	67.762	1.7	1	1	1	1.046	1.31	1.654	1.165	1.254	0.719	0.793	0.979	0.763	0.812	0.632	0.00119796
A0A452EV68	NADPH:adrenodoxin oxidoreductase, mitochondrial(predicted) OS=Capra hircus OX=9925 GN=FDXR PE=4 SV=1	FDXR	54.428	12	4	4	4	1.327	0.989	0.931	0.97	1.073	0.974	1.144	0.729	1.133	1.046	0.95	0.60636
A0A452EV92	Lysosomal alpha-glucosidase(predicted) OS=Capra hircus OX=9925 GN=GAA PE=4 SV=1	GAA	104.31	21.2	14	20	14	1.13	0.998	0.982	1.027	1.186	0.876	0.978	0.948	0.946	1.063	0.904	0.071381
A0A452EV97	Pyrroline-5-carboxylate reductase 3(predicted) OS=Capra hircus OX=9925 GN=PYCR3 PE=4 SV=1	PYCR3	32.311	4.5	1	1	1	1.028	1.022	1.469	1.008	0.899	0.692	0.943	1.294	1.047	1.097	0.935	0.5971
A0A452EVA5	Y-box binding protein 2(predicted) OS=Capra hircus OX=9925 GN=YBX2 PE=4 SV=1	YBX2	38.218	7.5	1	1	1	1.771	1.136	0.875	1.429	1.006	0.814	0.893	0.878	0.926	0.709	0.679	0.028015
A0A452EVE3	Tyrosine-protein kinase(predicted) OS=Capra hircus OX=9925 GN=FER PE=4 SV=1	FER	94.619	2.3	2	2	2
A0A452EVG7	V-type proton ATPase subunit H(predicted) OS=Capra hircus OX=9925 GN=ATP6V1H PE=4 SV=1	ATP6V1H	54.091	39.6	17	41	17	0.767	0.928	0.767	0.754	0.927	1.342	1.466	0.999	1.099	1.29	1.496	0.00152428
A0A452EVH8	Proteasome (Prosome, macropain) 26S subunit, ATPase, 4, isoform CRA_b(predicted) OS=Capra hircus OX=9925 GN=PSMC4 PE=4 SV=1	PSMC4	47.366	37.8	17	23	17	0.779	0.719	0.711	0.723	0.645	1.464	1.527	1.025	1.309	1.412	1.883	3.9268e-05
A0A452EVI7	40S ribosomal protein S3a(predicted) OS=Capra hircus OX=9925 GN=RPS3A PE=4 SV=1	RPS3A	29.945	12.5	4	5	4	1.575	0.845	0.948	1.791	1.036	1.183	0.771	0.781	0.782	0.611	0.666	0.066778
A0A452EVJ6	LanC-like protein 2(predicted) OS=Capra hircus OX=9925 GN=LANCL2 PE=4 SV=1	LANCL2	51.256	2.9	1	1	1	1.554	0.728	0.816	1.862	0.859	1.934	0.88	0.668	0.571	0.576	0.795	0.38086
A0A452EVM2	Angiotensin-converting enzyme(predicted) OS=Capra hircus OX=9925 GN=ACE2 PE=4 SV=1	ACE2	86.427	4	3	3	3	1.671	1.053	1.147	1.698	0.972	0.757	0.759	0.846	0.818	0.732	0.598	0.0155991
A0A452EVN3	Microtubule associated monooxygenase, calponin and LIM domain containing 1(predicted) OS=Capra hircus OX=9925 GN=MICAL1 PE=4 SV=1	MICAL1	117.14	5.8	6	7	6	0.894	0.819	1.036	0.917	0.787	1.147	1.599	1.044	0.983	1.323	1.369	0.0161428
A0A452EVP1	Apolipoprotein D(predicted) OS=Capra hircus OX=9925 GN=APOD PE=4 SV=1	APOD	24.13	11.7	2	4	2	1.132	1.122	1.589	1.103	1.332	0.854	0.797	1.028	0.778	0.665	0.657	0.0029188
A0A452EVP9	Collagen alpha-1(VIII) chain(predicted) OS=Capra hircus OX=9925 GN=COL8A1 PE=4 SV=1	COL8A1	73.2	9.7	6	7	6	1.272	0.765	2.818	1.422	0.89	0.67	0.782	0.723	0.631	0.715	0.491	0.058858
A0A452EVV8	TTC38 isoform 1(predicted) OS=Capra hircus OX=9925 GN=TTC38 PE=4 SV=1	TTC38	52.316	29.4	11	12	11	0.998	0.926	1.025	0.96	1.053	1.138	1.122	1.091	1.068	1.07	1.106	0.0046554
A0A452EVX1	Collagen type XXI alpha 1 chain(predicted) OS=Capra hircus OX=9925 PE=4 SV=1	---	50.918	6.4	4	4	4	1.077	1.239	1.277	1.224	1.201	0.78	0.79	1.239	0.969	0.698	0.744	0.04032
A0A452EVX4	T-complex protein 1 subunit alpha(predicted) OS=Capra hircus OX=9925 GN=TCP1 PE=4 SV=1	TCP1	60.294	54.1	27	61	27	0.83	0.801	0.719	0.828	0.739	1.627	1.238	0.912	1.103	1.331	1.586	0.0116181
A0A452EVY7	Mth938 domain-containing protein(predicted) OS=Capra hircus OX=9925 GN=AAMDC PE=4 SV=1	AAMDC	13.388	14.8	2	2	2	1.075	0.881	0.66	1.259	1.022	1.924	1.145	0.809	0.922	0.731	1.129	0.7036
A0A452EVY8	SGT1 suppressor of G2 allele of SKP1(predicted) OS=Capra hircus OX=9925 GN=SUGT1 PE=4 SV=1	SUGT1	37.158	10.2	3	3	3	1.072	0.795	0.673	1.128	0.755	1.89	1.122	1.041	0.933	0.974	1.348	0.121983
A0A452EVZ5	Ig kappa chain V-II region RPMI 6410(predicted) OS=Capra hircus OX=9925 PE=4 SV=1	---	16.604	15.5	2	2	2	0.677	1.071	1.539	0.927	1.381	1.138	1.142	1.095	0.825	0.707	0.877	0.55458
A0A452EW03	cAMP-dependent protein kinase catalytic subunit alpha(predicted) OS=Capra hircus OX=9925 GN=PRKACA PE=4 SV=1	PRKACA	40.026	37.1	11	26	11	1.05	1.04	0.845	0.937	1.098	1.245	1.109	0.92	0.943	1.104	1.071	0.39336
A0A452EW11	Complement component C7(predicted) OS=Capra hircus OX=9925 GN=C7 PE=4 SV=1	C7	92.156	8.1	7	7	7	0.805	1.19	1.991	0.892	1.144	0.601	1.009	1.353	0.748	0.863	0.76	0.2473
A0A452EW27	Inhibitor of carbonic anhydrase (Fragment)(predicted) OS=Capra hircus OX=9925 GN=LOC102172488 PE=4 SV=1	LOC102172488	77.608	83.1	54	157	1	1.092	0.697	1.497	1.053	0.728	0.742	1.427	1.216	1.193	0.838	1.069	0.69018
A0A452EW49	Inhibitor of carbonic anhydrase (Fragment)(predicted) OS=Capra hircus OX=9925 GN=LOC102172488 PE=4 SV=1	LOC102172488	77.236	83.6	54	158	1	1.043	0.788	1.435	0.917	0.824	0.719	1.268	1.415	1.158	0.942	1.099	0.58606
A0A452EW53	Reticulocalbin 2(predicted) OS=Capra hircus OX=9925 GN=RCN2 PE=4 SV=1	RCN2	36.968	30.6	11	15	11	0.558	0.811	0.755	0.587	0.705	1.475	1.643	1.303	1.298	1.351	2.07	2.25e-05
A0A452EW54	Exportin-2(predicted) OS=Capra hircus OX=9925 GN=CSE1L PE=4 SV=1	CSE1L	110.37	6.7	6	6	6	0.918	1.1	0.893	1.027	1.147	1.265	1.178	0.863	1.06	0.997	1.055	0.5671
A0A452EW65	Ribose-5-phosphate isomerase(predicted) OS=Capra hircus OX=9925 GN=RPIA PE=4 SV=1	RPIA	31.67	41.5	10	15	10	1.202	0.989	1.036	1.258	1.01	0.935	1.168	0.906	0.99	0.98	0.906	0.175478
A0A452EW94	Electron transfer flavoprotein subunit beta(predicted) OS=Capra hircus OX=9925 GN=ETFB PE=4 SV=1	ETFB	27.713	37.3	8	12	8	1.111	1.004	0.965	0.938	0.968	1.029	0.962	1.004	1.014	1.144	1.033	0.4461
A0A452EWC8	Monocarboxylic acid transporter 1(predicted) OS=Capra hircus OX=9925 GN=SLC16A1 PE=4 SV=1	SLC16A1	54.23	12	9	14	9	1.526	1.481	1.421	1.441	1.443	0.625	0.597	0.498	0.667	0.647	0.415	7.7947e-05
A0A452EWD3	EKC/KEOPS complex subunit LAGE3-like(predicted) OS=Capra hircus OX=9925 PE=4 SV=1	---	18.313	16.2	2	2	2	1.067	1.185	1.031	0.964	1.064	1.077	1.008	0.921	1.069	1.042	0.963	0.4285
A0A452EWE5	Alpha-mannosidase(predicted) OS=Capra hircus OX=9925 GN=LOC102188844 PE=4 SV=1	LOC102188844	115.13	30.6	29	72	8	0.796	0.867	0.856	0.866	0.938	1.24	1.588	1.131	0.999	0.921	1.36	0.041658
A0A452EWE6	Ammonia transporter RhCG(predicted) OS=Capra hircus OX=9925 GN=RHCG PE=4 SV=1	RHCG	51.008	7.4	3	8	3	1.26	1.29	1.461	1.272	1.311	0.751	0.951	0.807	0.809	0.832	0.629	4.676e-06
A0A452EWE8	Putative ca2+-binding protein(predicted) OS=Capra hircus OX=9925 GN=CAPNS1 PE=4 SV=1	CAPNS1	23.269	36	8	14	8	1.047	1.064	1.004	1.023	1.054	0.88	1.084	0.961	1.089	1.123	0.989	0.77314
A0A452EWF9	Eukaryotic translation initiation factor 3 subunit A(predicted) OS=Capra hircus OX=9925 GN=EIF3A PE=4 SV=1	EIF3A	165.13	12.9	19	22	19	1.067	0.915	0.844	1.344	0.894	0.984	1.16	0.965	1.062	1.041	1.029	0.65762
A0A452EWG1	Cytochrome c oxidase subunit 5B, mitochondrial(predicted) OS=Capra hircus OX=9925 GN=COX5B PE=4 SV=1	COX5B	15.707	5.8	1	1	1	1.343	0.952	1.045	0.906	0.571	0.716	1.42	0.871	1.024	1.529	1.154	0.5063
A0A452EWG2	Solute carrier family 4 member 11(predicted) OS=Capra hircus OX=9925 GN=SLC4A11 PE=4 SV=1	SLC4A11	95.808	1.9	1	1	1	1.48	1.057	0.896	1.298	1.435	0.993	0.778	0.747	0.872	0.854	0.688	0.0101032
A0A452EWG8	Insulin-degrading enzyme(predicted) OS=Capra hircus OX=9925 GN=IDE PE=4 SV=1	IDE	118.02	20.2	20	23	20	0.944	0.777	0.856	0.998	0.732	1.401	1.442	0.938	0.983	1.211	1.387	0.0166969
A0A452EWL1	Cytochrome b-c1 complex subunit 2, mitochondrial(predicted) OS=Capra hircus OX=9925 GN=UQCRC2 PE=4 SV=1	UQCRC2	48.166	14.8	5	5	5	1.138	0.926	1.437	1.006	0.734	0.956	1.036	0.617	1.064	0.937	0.88	0.43794
A0A452EWL7	heterogeneous nuclear ribonucleoprotein K isoform X5(predicted) OS=Capra hircus OX=9925 PE=4 SV=1	---	48.53	4.3	2	2	2	0.889	1.269	1.351	0.965	1.325	0.975	0.787	1.015	1.008	0.89	0.806	0.073578
A0A452EWM1	Mannan-binding lectin serine peptidase 1 (C4/C2 activating component of Ra-reactive factor)(predicted) OS=Capra hircus OX=9925 GN=MASP1 PE=4 SV=1	MASP1	81.339	24.5	16	27	16	0.938	0.965	1.784	1.034	0.894	0.679	1.066	1.503	0.647	0.621	0.804	0.28558
A0A452EWN3	Epididymis secretory sperm binding protein(predicted) OS=Capra hircus OX=9925 GN=UBE2M PE=4 SV=1	UBE2M	20.9	26.8	4	6	4	0.982	0.837	0.941	1.1	0.847	1.495	1.28	1.009	0.989	0.998	1.226	0.081435
A0A452EWR7	Proteasome subunit alpha type(predicted) OS=Capra hircus OX=9925 GN=PSMA3 PE=4 SV=1	PSMA3	28.419	47.8	14	31	14	1.104	1.004	0.908	1.101	1.003	1.151	1.007	0.81	0.925	1.016	0.959	0.51874
A0A452EWS2	Prostatic acid phosphatase(predicted) OS=Capra hircus OX=9925 GN=ACPP PE=4 SV=1	ACPP	44.671	12.9	3	3	3	1.214	1.192	1.314	1.338	1.044	0.581	0.821	1.093	1.068	0.815	0.717	0.020616
A0A452EWS3	carboxypeptidase A5 isoform X2(predicted) OS=Capra hircus OX=9925 GN=CPA5 PE=4 SV=1	CPA5	51.489	10.7	6	7	6	1.539	1.493	1.58	1.358	1.531	0.516	0.514	0.593	0.718	0.644	0.398	4.7591e-07
A0A452EWT7	5-oxoprolinase(predicted) OS=Capra hircus OX=9925 GN=OPLAH PE=4 SV=1	OPLAH	137.5	29	30	36	30	0.99	0.826	1.059	1.031	0.903	0.857	1.338	1.024	1.008	1.187	1.126	0.24604
A0A452EWU7	Myeloid-derived growth factor(predicted) OS=Capra hircus OX=9925 GN=MYDGF PE=4 SV=1	MYDGF	18.477	18.3	2	4	2	0.935	0.871	0.687	0.926	0.834	0.951	0.688	0.787	0.651	2.961	1.42	0.59084
A0A452EWV5	suprabasin(predicted) OS=Capra hircus OX=9925 GN=SBSN PE=4 SV=1	SBSN	58.616	7.3	1	1	1	0.721	0.706	3.46	0.936	0.617	0.537	0.651	0.979	0.616	1.344	0.641	0.49704
A0A452EWZ3	Serpin A3-1(predicted) OS=Capra hircus OX=9925 GN=LOC102174166 PE=4 SV=1	LOC102174166	55.028	24.5	12	6	4	1.282	1.148	1.13	1.283	1.09	0.722	0.757	1.499	0.766	0.94	0.789	0.120681
A0A452EX35	N-acetyltransferase ESCO1(predicted) OS=Capra hircus OX=9925 GN=ESCO1 PE=4 SV=1	ESCO1	94.838	1.1	1	1	1	1.609	0.96	1.33	1.222	1.118	0.895	0.739	0.625	1.059	0.853	0.669	0.0116845
A0A452EX37	Protein S100(predicted) OS=Capra hircus OX=9925 GN=S100G PE=4 SV=1	S100G	8.918	16.5	1	1	1	1.381	1.003	0.553	1.401	1.217	0.857	0.683	0.536	1.251	1.428	0.856	0.51946
A0A452EX54	Alpha-galactosidase(predicted) OS=Capra hircus OX=9925 GN=GLA PE=4 SV=1	GLA	49.597	29.6	12	18	12	0.938	1.107	1.035	1.003	1.116	1.116	0.978	1.127	1.124	0.982	1.025	0.61574
A0A452EX66	Isocitrate dehydrogenase [NAD] subunit, mitochondrial(predicted) OS=Capra hircus OX=9925 GN=IDH3G PE=4 SV=1	IDH3G	42.259	10.1	3	4	3	1.097	1.042	0.983	0.985	0.985	1.08	0.982	1.013	1.045	1.218	1.048	0.32396
A0A452EX74	A-kinase anchor protein 4 (Fragment)(predicted) OS=Capra hircus OX=9925 GN=AKAP4 PE=4 SV=1	AKAP4	92.888	31	24	48	24	1.587	1.52	1.288	1.431	1.425	0.484	0.462	0.647	0.598	0.645	0.391	1.2032e-06
A0A452EX96	XPO7 protein(predicted) OS=Capra hircus OX=9925 GN=XPO7 PE=4 SV=1	XPO7	123.89	24.1	24	32	24	0.957	0.944	0.778	0.957	0.918	1.263	1.257	0.953	1.058	1.127	1.242	0.0120204
A0A452EXB3	Protein S100-A14(predicted) OS=Capra hircus OX=9925 GN=S100A14 PE=4 SV=1	S100A14	11.455	55.8	6	7	6	0.842	0.998	0.754	0.838	1.359	1.545	0.686	0.882	1.609	0.711	1.134	0.72062
A0A452EXC9	ATP6V1B2(predicted) OS=Capra hircus OX=9925 GN=ATP6V1B2 PE=4 SV=1	ATP6V1B2	56.576	59.3	26	61	26	0.808	0.929	0.735	0.79	0.898	1.333	1.448	0.962	1.083	1.24	1.458	0.00238
A0A452EXE8	Protein S100(predicted) OS=Capra hircus OX=9925 GN=S100A9 PE=4 SV=1	S100A9	16.69	37.7	6	10	6	0.885	0.894	2.151	1.262	0.782	0.67	0.664	0.996	0.815	1.313	0.746	0.29246
A0A452EXG2	Sjoegren syndrome nuclear autoantigen 1 homolog(predicted) OS=Capra hircus OX=9925 GN=SSNA1 PE=4 SV=1	SSNA1	13.599	16	2	3	2	1.054	0.963	0.705	0.985	0.995	1.44	1.26	0.84	0.961	1.189	1.21	0.168177
A0A452EXH9	F-box only protein 6(predicted) OS=Capra hircus OX=9925 GN=FBXO6 PE=4 SV=1	FBXO6	30.844	21.9	6	6	6	0.941	0.744	0.853	0.944	0.873	1.186	1.344	1.151	0.93	0.826	1.248	0.064136
A0A452EXI3	glutathione reductase, mitochondrial(predicted) OS=Capra hircus OX=9925 GN=GSR PE=4 SV=1	GSR	54.549	17.3	7	8	7	1.218	1.025	1.203	1.202	0.9	1.138	0.943	0.861	0.793	1.019	0.857	0.111419
A0A452EXK5	Phospholysine phosphohistidine inorganic pyrophosphate phosphatase(predicted) OS=Capra hircus OX=9925 GN=LHPP PE=4 SV=1	LHPP	29.233	15.6	4	4	4	1.041	1.019	0.929	1.086	0.917	1.049	1.012	0.968	0.993	1.123	1.031	0.47934
A0A452EXL2	Vesicle-associated membrane protein 8(predicted) OS=Capra hircus OX=9925 GN=VAMP8 PE=4 SV=1	VAMP8	11.439	7.9	1	1	1	0.914	0.9	0.962	0.981	1.007	0.9	0.979	1.252	1.586	0.97	1.194	0.22076
A0A452EXQ4	Syntaxin-3(predicted) OS=Capra hircus OX=9925 GN=STX3 PE=4 SV=1	STX3	33.113	6.6	2	2	2	1.014	1.021	1.026	1.013	1.132	1.034	0.962	1.153	1.176	0.929	1.009	0.91558
A0A452EXU2	WD repeat-containing protein 13(predicted) OS=Capra hircus OX=9925 GN=WDR13 PE=4 SV=1	WDR13	53.666	4.3	1	1	1	0.484	0.669	0.578	0.49	0.594	1.555	1.486	1.451	1.599	1.523	2.705	9.7459e-05
A0A452EXV2	Glutaminyl-peptide cyclotransferase(predicted) OS=Capra hircus OX=9925 GN=QPCT PE=4 SV=1	QPCT	41.235	50.4	14	37	14	0.906	0.754	0.781	0.86	0.831	1.688	1.259	0.947	0.961	1.149	1.453	0.033385
A0A452EY04	Proteasome subunit beta(predicted) OS=Capra hircus OX=9925 GN=PSMB2 PE=4 SV=1	PSMB2	22.896	42.3	15	43	15	1.203	1.007	0.908	1.19	0.993	1.206	1.025	0.907	0.95	1.028	0.965	0.6517
A0A452EY08	Protein arginine N-methyltransferase 5(predicted) OS=Capra hircus OX=9925 GN=PRMT5 PE=4 SV=1	PRMT5	72.617	22.6	12	17	12	1.024	0.843	0.665	1.096	0.804	1.312	1.433	0.971	1.061	0.937	1.289	0.070423
A0A452EY23	Soluble calcium-activated nucleotidase 1(predicted) OS=Capra hircus OX=9925 GN=CANT1 PE=4 SV=1	CANT1	38.839	41.1	10	10	10	0.899	1.213	1.202	0.909	1.113	0.795	1.072	1.226	1.176	0.791	0.948	0.60542
A0A452EY39	Leucine rich repeat containing 18 OS=Capra hircus OX=9925 GN=LRRC18 PE=4 SV=1	LRRC18	29.324	9.6	2	2	2
A0A452EY51	Nipsnap homolog 3A OS=Capra hircus OX=9925 GN=NIPSNAP3A PE=4 SV=1	NIPSNAP3A	28.6	22.4	7	11	7	1.506	1.427	1.241	1.414	1.298	0.596	0.61	0.717	0.582	0.9	0.494	4.0925e-05
A0A452EY56	26S protease regulatory subunit 4(predicted) OS=Capra hircus OX=9925 GN=PSMC1 PE=4 SV=1	PSMC1	49.181	53.9	22	35	22	0.808	0.804	0.783	0.89	0.786	1.299	1.383	1.079	1.239	1.212	1.526	2.0239e-05
A0A452EY58	methylglutaconyl-CoA hydratase, mitochondrial(predicted) OS=Capra hircus OX=9925 GN=AUH PE=4 SV=1	AUH	33.355	33.9	11	15	11	1.193	1.242	0.799	1.003	1.131	0.986	0.897	0.69	0.917	1.184	0.871	0.26508
A0A452EY63	Protein phosphatase 6 regulatory subunit 1(predicted) OS=Capra hircus OX=9925 GN=PPP6R1 PE=4 SV=1	PPP6R1	93.562	2.7	1	1	1	1.077	0.778	1.174	1.075	0.855	1.043	1.24	1.035	0.99	1.17	1.105	0.25882
A0A452EY73	26S proteasome non-ATPase regulatory subunit 2(predicted) OS=Capra hircus OX=9925 GN=PSMD2 PE=4 SV=1	PSMD2	107.62	31.8	31	43	31	0.827	0.82	0.714	0.836	0.748	1.372	1.451	0.983	1.204	1.305	1.601	0.00025941
A0A452EY83	DnaJ (Hsp40) homolog, subfamily B, member 2(predicted) OS=Capra hircus OX=9925 GN=DNAJB2 PE=4 SV=1	DNAJB2	30.741	20.9	6	7	6	0.763	0.771	0.604	0.705	0.659	1.282	1.715	0.957	1.187	1.387	1.864	0.00043531
A0A452EY89	2'-5'-oligoadenylate synthase 2(predicted) OS=Capra hircus OX=9925 PE=4 SV=1	---	59.248	1.6	1	1	1	1.043	1.01	1.1	0.986	1.209	1.476	0.963	0.904	1.037	0.727	0.955	0.58868
A0A452EY92	Diablo IAP-binding mitochondrial protein(predicted) OS=Capra hircus OX=9925 GN=DIABLO PE=4 SV=1	DIABLO	26.982	2.9	1	1	1
A0A452EYB5	Protein FAM71E2 (Fragment)(predicted) OS=Capra hircus OX=9925 PE=4 SV=1	---	56.445	5.2	4	5	4	1.553	1.34	1.646	1.513	1.575	0.617	0.47	0.671	0.551	0.54	0.374	3.0256e-07
A0A452EYB6	Lysosomal acid phosphatase (Fragment)(predicted) OS=Capra hircus OX=9925 GN=ACP2 PE=4 SV=1	ACP2	48.314	13.5	5	5	5	0.933	1.014	1.316	0.913	1.043	0.759	0.949	1.205	1.141	0.993	0.967	0.72806
A0A452EYE3	Nucleoporin 155(predicted) OS=Capra hircus OX=9925 GN=NUP155 PE=4 SV=1	NUP155	155.22	1.4	2	2	2	1.381	0.868	1.295	1.453	1.09	0.858	0.917	0.8	0.94	0.831	0.714	0.030915
A0A452EYF6	Heat shock cognate 71 kDa protein(predicted) OS=Capra hircus OX=9925 GN=HSPA8 PE=4 SV=1	HSPA8	70.508	38.9	27	52	4	1.047	0.844	0.913	1.104	1.02	1.457	0.897	0.981	1.081	0.896	1.078	0.55888
A0A452EYH6	Lactotransferrin OS=Capra hircus OX=9925 GN=LTF PE=4 SV=1	LTF	77.368	79.2	70	240	0
A0A452EYI4	D-dopachrome decarboxylase(predicted) OS=Capra hircus OX=9925 GN=DDTL PE=4 SV=1	DDTL	12.877	57.6	5	6	5	1.207	1.081	0.917	1.07	1.105	1.153	1.134	0.823	0.816	1.056	0.926	0.36774
A0A452EYI5	Mediator of RNA polymerase II transcription subunit 21(predicted) OS=Capra hircus OX=9925 GN=MED21 PE=4 SV=1	MED21	15.521	4.9	1	1	1	0.894	0.559	0.453	0.903	0.488	1.143	1.922	0.983	1.549	1.442	2.135	0.0034378
A0A452EYJ1	Phosphatidylethanolamine-binding protein 1(predicted) OS=Capra hircus OX=9925 GN=PEBP1 PE=4 SV=1	PEBP1	21.016	80.2	14	29	14	1.063	1.01	0.678	1.133	1.08	1.787	0.871	0.79	0.878	0.84	1.041	0.98434
A0A452EYJ6	Polypeptide N-acetylgalactosaminyltransferase(predicted) OS=Capra hircus OX=9925 GN=GALNT10 PE=4 SV=1	GALNT10	68.842	35.8	20	28	20	0.899	1.049	1.015	0.864	0.982	1.193	0.934	1.311	1.314	0.965	1.189	0.080418
A0A452EYM2	Ubiquitin specific peptidase 28(predicted) OS=Capra hircus OX=9925 GN=USP28 PE=4 SV=1	USP28	119.22	1.8	2	2	2	1.025	0.863	0.87	0.872	0.912	1.178	1.166	1.05	1.058	1.417	1.292	0.0039001
A0A452EYN6	26S proteasome non-ATPase regulatory subunit 1(predicted) OS=Capra hircus OX=9925 GN=PSMD1 PE=4 SV=1	PSMD1	105.89	41.1	32	50	32	0.882	0.831	0.841	0.899	0.773	1.235	1.26	1.09	1.175	1.275	1.428	1.82979e-05
A0A452EYS1	Semaphorin-3C(predicted) OS=Capra hircus OX=9925 GN=SEMA3C PE=4 SV=1	SEMA3C	85.167	41.9	27	52	27	0.936	1.154	1.065	0.958	0.993	0.67	0.772	1.66	1.09	1.127	1.042	0.96622
A0A452EYV3	Kelch-like protein 10(predicted) OS=Capra hircus OX=9925 GN=KLHL10 PE=4 SV=1	KLHL10	68.102	48.6	29	46	29	0.83	0.82	0.745	0.916	0.761	1.308	1.418	1.099	1.171	1.201	1.522	8.3224e-05
A0A452EZ41	LIM and calponin homology domains 1(predicted) OS=Capra hircus OX=9925 GN=LIMCH1 PE=4 SV=1	LIMCH1	118.97	0.7	1	2	1	0.635	0.831	0.664	0.717	0.948	1.523	1.393	0.924	1.236	1.497	1.732	0.00172209
A0A452EZ43	BPI fold-containing family B member 1(predicted) OS=Capra hircus OX=9925 GN=BPIFB1 PE=4 SV=1	BPIFB1	56.144	41.4	17	95	17	0.667	2.305	1.471	0.667	1.082	0.457	0.567	0.85	0.876	1.243	0.645	0.23104
A0A452EZ57	gamma-glutamyltranspeptidase 1 isoform X2(predicted) OS=Capra hircus OX=9925 GN=GGT1 PE=4 SV=1	GGT1	60.732	13.2	8	12	8	0.921	1.015	0.971	0.915	1	0.744	0.957	1.478	1.099	1.231	1.142	0.41234
A0A452EZ69	protein LEG1 homolog(predicted) OS=Capra hircus OX=9925 GN=LOC102185363 PE=4 SV=1	LOC102185363	39.904	5.8	2	3	2	1.329	0.564	2.601	0.895	0.479	0.432	0.468	1.171	0.781	1.795	0.792	0.6631
A0A452EZ82	NAD-dependent protein deacylase sirtuin-5, mitochondrial(predicted) OS=Capra hircus OX=9925 GN=SIRT5 PE=4 SV=1	SIRT5	33.997	12.6	3	3	3	1.262	1.101	1.074	0.986	1.245	0.864	0.958	0.824	0.901	1.006	0.803	0.0059987
A0A452EZ83	Beta-1,4-galactosyltransferase 5 (Fragment)(predicted) OS=Capra hircus OX=9925 GN=B4GALT5 PE=4 SV=1	B4GALT5	44.027	4.5	1	1	1	1.116	0.672	0.934	1.125	0.826	0.884	0.729	1.27	1.981	0.909	1.235	0.43932
A0A452EZ85	Angiotensin II receptor associated protein(predicted) OS=Capra hircus OX=9925 GN=AGTRAP PE=4 SV=1	AGTRAP	17.247	11.6	1	1	1	1.059	0.856	0.993	1.083	0.893	1.024	0.994	1.338	0.93	1.304	1.145	0.182023
A0A452EZ94	40S ribosomal protein S20(predicted) OS=Capra hircus OX=9925 GN=RPS20 PE=4 SV=1	RPS20	14.076	21.6	3	4	3	1.379	1.14	0.832	1.496	1.25	1.011	0.762	0.914	0.919	0.74	0.713	0.024383
A0A452EZ97	Serine/threonine-protein kinase OSR1(predicted) OS=Capra hircus OX=9925 GN=OXSR1 PE=4 SV=1	OXSR1	57.886	11.8	5	6	5	0.854	0.87	0.974	0.99	0.954	1.307	1.331	0.989	1.088	1.051	1.242	0.0135221
A0A452EZD9	Alpha/beta hydrolase domain-containing protein 17A(predicted) OS=Capra hircus OX=9925 GN=ABHD17A PE=4 SV=1	ABHD17A	34.068	6.1	2	3	2	1.1	0.972	1.047	1.181	0.975	1.042	1.022	1.028	0.994	1.081	0.98	0.6554
A0A452EZF1	cytoplasmic FMR1-interacting protein 1 isoform X2(predicted) OS=Capra hircus OX=9925 GN=CYFIP1 PE=4 SV=1	CYFIP1	143.86	1.5	2	2	2	1.08	0.979	1.334	1.286	0.938	1.135	0.968	1.25	0.7	0.853	0.873	0.27602
A0A452EZG6	Serine/threonine-protein phosphatase with EF-hands(predicted) OS=Capra hircus OX=9925 GN=PPEF1 PE=4 SV=1	PPEF1	76.146	18.4	10	16	10	1.176	1.065	0.899	1.179	1.327	0.846	1.003	0.748	0.981	1.037	0.817	0.055258
A0A452EZH8	Frizzled-6 (Fragment)(predicted) OS=Capra hircus OX=9925 GN=FZD6 PE=4 SV=1	FZD6	79.46	2.4	1	1	1
A0A452EZL5	26S proteasome regulatory subunit 10B(predicted) OS=Capra hircus OX=9925 GN=PSMC6 PE=4 SV=1	PSMC6	45.796	60	22	35	22	0.848	0.839	0.892	0.893	0.832	1.163	1.202	1.211	1.156	1.252	1.39	1.3857e-07
A0A452EZP1	Mannosidase alpha class 2C member 1(predicted) OS=Capra hircus OX=9925 GN=MAN2C1 PE=4 SV=1	MAN2C1	115.63	44.8	40	103	40	0.885	0.921	0.847	0.876	0.9	1.167	1.296	1.03	1.046	1.177	1.291	0.00047801
A0A452EZP6	Protein tyrosine phosphatase, receptor type Z1(predicted) OS=Capra hircus OX=9925 GN=PTPRZ1 PE=4 SV=1	PTPRZ1	254.44	0.4	1	1	1	0.734	0.817	0.929	0.796	0.903	2.063	1.194	1.104	1.113	0.825	1.507	0.07814
A0A452EZS5	Zeta-crystallin(predicted) OS=Capra hircus OX=9925 GN=CRYZ PE=4 SV=1	CRYZ	35.302	40.6	11	19	11	0.984	1.107	0.888	0.911	1.115	1.435	1.223	0.906	0.923	0.853	1.067	0.67468
A0A452EZS6	N-acetylated-alpha-linked acidic dipeptidase 2 (Fragment)(predicted) OS=Capra hircus OX=9925 GN=NAALAD2 PE=4 SV=1	NAALAD2	82.94	38.1	24	46	22	0.905	1.063	0.939	0.898	1.189	1.285	0.978	0.847	1.209	1.033	1.072	0.50704
A0A452EZY1	C5H12ORF53 protein(predicted) OS=Capra hircus OX=9925 GN=PIANP PE=4 SV=1	PIANP	29.569	2.5	1	1	1
A0A452F014	SERPINA5(predicted) OS=Capra hircus OX=9925 GN=SERPINA5 PE=4 SV=1	SERPINA5	45.497	23	8	8	6	1.089	1.268	1.279	1.015	1.33	0.705	0.886	0.897	0.877	0.868	0.708	0.0010787
A0A452F069	60S ribosomal protein L18(predicted) OS=Capra hircus OX=9925 GN=RPL18 PE=4 SV=1	RPL18	21.39	14.4	2	6	2	1.078	1.023	1.135	1.166	0.964	0.943	0.944	0.952	1.111	1.115	0.944	0.29842
A0A452F074	IGHG2 isoform 1 (Fragment)(predicted) OS=Capra hircus OX=9925 PE=4 SV=1	---	45.296	35.9	15	66	4	1.043	0.989	1.896	1.109	1.023	0.337	0.933	1.189	0.937	0.829	0.697	0.141981
A0A452F086	Radial spoke head 1 homolog (Chlamydomonas)(predicted) OS=Capra hircus OX=9925 GN=RSPH1 PE=4 SV=1	RSPH1	30.561	12.6	3	3	3	1.295	0.887	1.04	1.105	1.294	1.012	0.932	0.928	0.993	0.943	0.855	0.116397
A0A452F089	Complement component C8G(predicted) OS=Capra hircus OX=9925 GN=LOC102183974 PE=4 SV=1	LOC102183974	21.583	37.8	6	21	6	0.72	0.846	0.667	0.768	1.013	2.019	1.792	0.972	0.973	0.72	1.613	0.086717
A0A452F093	Fructose-1,6-bisphosphatase 1(predicted) OS=Capra hircus OX=9925 GN=FBP2 PE=4 SV=1	FBP2	38.21	60.2	22	79	21	0.866	0.955	0.794	0.891	0.946	1.563	1.16	0.961	1.049	1.1	1.31	0.020196
A0A452F096	Cytochrome b-c1 complex subunit 8(predicted) OS=Capra hircus OX=9925 GN=UQCRQ PE=4 SV=1	UQCRQ	9.7201	37.8	3	3	3	1.679	0.752	1.96	1.425	0.629	0.451	0.727	0.894	0.909	1.048	0.625	0.162316
A0A452F097	Dynein axonemal heavy chain 10(predicted) OS=Capra hircus OX=9925 GN=DNAH10 PE=4 SV=1	DNAH10	521.8	0.9	4	4	3	1.778	0.87	1.126	1.819	1.174	0.505	0.73	0.939	0.769	0.744	0.545	0.0097558
A0A452F099	Acetyl-Coenzyme A acetyltransferase 2(predicted) OS=Capra hircus OX=9925 GN=ACAT2 PE=4 SV=1	ACAT2	41.164	32.7	11	17	11	0.938	0.936	0.974	0.908	0.917	1.249	1.232	1.13	1.001	1.134	1.23	0.0078561
A0A452F0F0	Cytochrome c1, heme protein, mitochondrial(predicted) OS=Capra hircus OX=9925 GN=CYC1 PE=4 SV=1	CYC1	35.31	4	1	1	1
A0A452F0G2	HSD17B10(predicted) OS=Capra hircus OX=9925 GN=HSD17B10 PE=4 SV=1	HSD17B10	27.169	53.6	10	16	10	1.228	1.125	1.069	1.095	1.087	0.876	0.885	0.851	0.98	1.14	0.844	0.0184644
A0A452F0G5	Eukaryotic translation initiation factor 5A(predicted) OS=Capra hircus OX=9925 GN=EIF5A2 PE=4 SV=1	EIF5A2	15.574	26.8	3	3	3	1.192	1.002	1.097	1.275	0.996	1.198	0.812	0.978	0.994	0.915	0.88	0.139221
A0A452F0G8	Leukotriene A(4) hydrolase(predicted) OS=Capra hircus OX=9925 GN=LTA4H PE=4 SV=1	LTA4H	69.268	31.4	17	28	17	1.165	1.052	1.013	1.162	0.992	1.202	1.02	0.823	0.903	0.916	0.903	0.178119
A0A452F0I2	Leishmanolysin like peptidase(predicted) OS=Capra hircus OX=9925 GN=LMLN PE=4 SV=1	LMLN	73.998	14.5	8	8	8	0.945	0.982	1.088	1.071	1.039	1.102	1.207	0.965	1.17	0.922	1.047	0.50074
A0A452F0I4	dynein heavy chain 6, axonemal(predicted) OS=Capra hircus OX=9925 GN=DNAH6 PE=4 SV=1	DNAH6	397.12	2.2	8	8	6	1.179	1.229	1.214	1.067	1.469	0.592	0.595	0.685	0.701	0.689	0.53	4.6413e-06
A0A452F0J6	UDP-glucose:glycoprotein glucosyltransferase 1 (Fragment)(predicted) OS=Capra hircus OX=9925 GN=UGGT1 PE=4 SV=1	UGGT1	176.7	5.8	10	12	10	0.964	1.082	1.225	1.012	1.095	0.773	0.929	1.316	1.07	0.948	0.936	0.44328
A0A452F0K4	Interleukin 1 receptor accessory protein(predicted) OS=Capra hircus OX=9925 GN=IL1RAP PE=4 SV=1	IL1RAP	64.784	15.9	9	10	9	1.147	1.007	0.813	1.148	1.205	1.1	1.122	0.986	0.886	0.906	0.94	0.52708
A0A452F0L6	Thyroid receptor-interacting protein 11-like protein(predicted) OS=Capra hircus OX=9925 GN=FBLN5 PE=4 SV=1	FBLN5	50.178	21.9	11	31	11	1.172	0.98	1.371	1.287	0.874	0.553	0.626	1.775	0.972	0.884	0.846	0.30494
A0A452F0M7	V-type proton ATPase subunit(predicted) OS=Capra hircus OX=9925 GN=ATP6V0D1 PE=4 SV=1	ATP6V0D1	40.329	15.1	6	6	6	0.856	1.083	1.141	0.917	0.909	0.908	1	1.44	1.139	1.207	1.161	0.1791
A0A452F0N3	Chimera Csnk2b-Ly6g5b splicing isoform 737(predicted) OS=Capra hircus OX=9925 GN=LY6G5B PE=4 SV=1	LY6G5B	21.529	14.8	2	6	2	2.056	0.685	0.649	1.906	0.813	1.226	1.138	0.589	0.673	0.656	0.701	0.38424
A0A452F0N5	Ectonucleoside triphosphate diphosphohydrolase 1(predicted) OS=Capra hircus OX=9925 GN=ENTPD1 PE=4 SV=1	ENTPD1	58.718	2.1	1	2	1	1.151	0.943	1.206	1.164	0.928	0.814	1.162	0.989	1.153	0.929	0.936	0.45464
A0A452F0Q6	Ig gamma-3 chain C region(predicted) OS=Capra hircus OX=9925 PE=4 SV=1	---	36.349	41.3	13	74	2	0.674	1.93	1.792	0.668	2.096	0.452	0.748	0.714	0.674	0.569	0.441	0.032738
A0A452F0R4	proteasome-associated protein ECM29 homolog isoform X1(predicted) OS=Capra hircus OX=9925 GN=ECPAS PE=4 SV=1	ECPAS	202.56	0.7	1	1	1
A0A452F0R5	Fructose-1,6-bisphosphatase isozyme 2(predicted) OS=Capra hircus OX=9925 GN=FBP2 PE=4 SV=1	FBP2	37.994	8.9	2	7	1	0.619	1.456	1.73	0.605	1.261	0.427	1.482	1.011	1.336	0.546	0.847	0.58682
A0A452F0S7	Inactive serine/threonine-protein kinase VRK3(predicted) OS=Capra hircus OX=9925 GN=VRK3 PE=4 SV=1	VRK3	48.531	2.5	1	1	1	1.195	1.235	1.52	1.757	1.557	0.844	0.657	0.485	0.723	0.463	0.437	0.00026403
A0A452F0T1	Apoptosis facilitator Bcl-2-like protein 14(predicted) OS=Capra hircus OX=9925 GN=BCL2L14 PE=4 SV=1	BCL2L14	36.718	4.9	2	2	2	0.827	0.965	0.86	0.88	0.942	1.285	1.327	1.019	1.056	1.253	1.328	0.00183964
A0A452F0U5	Ubiquitin-protein ligase E3A(predicted) OS=Capra hircus OX=9925 GN=UBE3A PE=4 SV=1	UBE3A	100.36	18.7	13	16	13	0.765	0.828	0.838	0.775	0.828	1.361	1.338	1.014	1.223	1.382	1.566	8.1284e-05
A0A452F0U8	Defensin beta 110 OS=Capra hircus OX=9925 GN=DEFB110 PE=4 SV=1	DEFB110	7.8243	16.4	1	1	1
A0A452F0V3	60S ribosomal protein L7a (Fragment)(predicted) OS=Capra hircus OX=9925 PE=4 SV=1	---	27.454	3.8	1	6	1	1.005	0.914	1.462	1.189	0.88	0.755	1.041	1.475	1.144	0.79	0.955	0.7147
A0A452F0V4	UPF0454 protein C12orf49 homolog isoform X15(predicted) OS=Capra hircus OX=9925 GN=C12orf49 PE=4 SV=1	C12orf49	23.296	6.4	1	1	1	0.938	0.891	1.317	1.16	1.055	0.94	0.857	1.28	1.099	0.96	0.958	0.67902
A0A452F0Y6	dnaJ homolog subfamily A member 3, mitochondrial isoform X1(predicted) OS=Capra hircus OX=9925 GN=DNAJA3 PE=4 SV=1	DNAJA3	52.096	10.6	4	4	4	1.713	0.922	1.19	1.473	0.859	0.589	0.859	0.916	0.862	1.006	0.687	0.057836
A0A452F0Y7	Ubiquitin carboxyl-terminal hydrolase 4(predicted) OS=Capra hircus OX=9925 GN=USP4 PE=4 SV=1	USP4	108.62	10.5	10	10	10	0.876	0.851	1.031	0.988	0.911	1.153	1.098	1.111	1.149	1.058	1.196	0.00179719
A0A452F116	Hypoxia up-regulated protein 1(predicted) OS=Capra hircus OX=9925 GN=HYOU1 PE=4 SV=1	HYOU1	111.3	47.8	45	102	45	0.868	1.043	1.096	0.869	0.903	0.814	0.996	1.445	1.194	1.111	1.163	0.23282
A0A452F117	Ig lambda chain V-II region MGC (Fragment)(predicted) OS=Capra hircus OX=9925 PE=4 SV=1	---	17.174	9.6	2	14	1	0.605	2.263	1.178	0.713	2.368	0.465	0.785	0.79	0.472	0.663	0.445	0.056919
A0A452F133	Protein tyrosine phosphatase, receptor type G(predicted) OS=Capra hircus OX=9925 GN=PTPRG PE=4 SV=1	PTPRG	152.42	2.9	4	5	4	1.032	1.194	1.36	0.968	1.323	0.752	1.016	1.005	0.887	0.882	0.773	0.0185403
A0A452F148	UV excision repair protein RAD23 homolog A(predicted) OS=Capra hircus OX=9925 GN=RAD23A PE=4 SV=1	RAD23A	39.619	23.5	7	9	5	0.84	0.891	0.655	0.811	0.943	1.633	1.331	0.893	0.997	1.41	1.513	0.014799
A0A452F160	Sodium/potassium-transporting ATPase subunit alpha-1(predicted) OS=Capra hircus OX=9925 GN=ATP1A1 PE=4 SV=1	ATP1A1	110.16	10.9	11	21	2	1.062	1.045	1.073	0.918	1.071	0.961	1.05	1.087	1.077	1.201	1.04	0.43176
A0A452F181	Ras-related protein Rab-2B(predicted) OS=Capra hircus OX=9925 GN=RAB2B PE=4 SV=1	RAB2B	23.334	49.8	9	18	4	1.21	1.132	1.12	1.063	1.032	0.802	0.926	0.869	0.949	1.059	0.829	0.0075821
A0A452F195	Syndecan binding protein(predicted) OS=Capra hircus OX=9925 GN=SDCBP PE=4 SV=1	SDCBP	38.692	32.9	7	8	7	0.956	1.167	1.217	0.91	1.212	0.649	0.902	1.224	1.118	1.016	0.899	0.36348
A0A452F199	Protein phosphatase 4 regulatory subunit 1(predicted) OS=Capra hircus OX=9925 GN=PPP4R1 PE=4 SV=1	PPP4R1	99.24	18.9	12	16	12	0.832	0.768	0.791	0.852	0.735	1.307	1.431	1.176	1.208	1.282	1.61	2.1391e-06
A0A452F1F5	Ribulose-phosphate 3-epimerase(predicted) OS=Capra hircus OX=9925 GN=RPE PE=4 SV=1	RPE	24.914	3.9	1	1	1	1.242	0.86	0.751	1.287	1.148	1.499	1.023	0.809	0.885	0.91	0.969	0.82778
A0A452F1F7	RPLP2(predicted) OS=Capra hircus OX=9925 GN=RPLP2 PE=4 SV=1	RPLP2	11.679	76.5	5	7	5	1.605	0.796	0.927	1.966	0.846	1.098	0.748	0.826	0.826	0.738	0.69	0.151922
A0A452F1I7	Tubulin tyrosine ligase-like family, member 12(predicted) OS=Capra hircus OX=9925 GN=TTLL12 PE=4 SV=1	TTLL12	73.18	5.8	3	4	3	0.854	0.971	0.982	0.864	0.758	1.129	1.065	1.219	1.133	1.189	1.295	0.00113513
A0A452F1K9	Probable cystatin-15(predicted) OS=Capra hircus OX=9925 GN=LOC102173480 PE=4 SV=1	LOC102173480	14.966	14.1	1	1	1	1.323	1.185	0.741	1.219	1.3	0.938	1.283	0.896	0.618	0.916	0.806	0.199899
A0A452F1L3	Coiled-coil domain-containing protein 151(predicted) OS=Capra hircus OX=9925 GN=RGL3 PE=4 SV=1	RGL3	71.267	3.4	2	2	2	1.739	1.375	0.991	1.533	1.216	0.621	0.68	0.696	0.875	0.696	0.521	0.00044202
A0A452F1M8	Putative adenylate kinase 7 (Fragment)(predicted) OS=Capra hircus OX=9925 GN=AK7 PE=4 SV=1	AK7	83.045	9.3	6	6	6	1.602	1.122	1.015	1.367	1.367	0.805	0.759	0.683	0.822	0.751	0.59	0.00034242
A0A452F1P5	HCG26477(predicted) OS=Capra hircus OX=9925 GN=RPS28 PE=4 SV=1	RPS28	7.8409	15.9	1	1	1	1.627	0.865	0.342	2.744	0.437	2.053	0.663	0.492	0.621	0.571	0.732	0.71384
A0A452F1P8	hsc70-interacting protein isoform X1(predicted) OS=Capra hircus OX=9925 GN=ST13 PE=4 SV=1	ST13	41.932	34.8	13	36	7	0.794	0.815	0.783	0.85	0.821	1.782	1.331	1.041	1.089	1.07	1.554	0.014919
A0A452F1Q3	Nucleoside diphosphate kinase A 1(predicted) OS=Capra hircus OX=9925 GN=NME1 PE=4 SV=1	NME1	17.252	65.8	9	29	6	1.1	1.121	0.766	1.093	1.102	1.12	1.236	0.939	0.862	1.036	1.002	0.96788
A0A452F1S0	NDUFS3(predicted) OS=Capra hircus OX=9925 GN=NDUFS3 PE=4 SV=1	NDUFS3	30.388	8.6	2	2	2
A0A452F1S9	40S ribosomal protein S25(predicted) OS=Capra hircus OX=9925 PE=4 SV=1	---	10.309	10.8	1	1	1	1.479	0.792	0.824	1.939	0.886	1.204	0.821	0.675	0.959	0.823	0.757	0.2934
A0A452F205	ADP/ATP translocase 4(predicted) OS=Capra hircus OX=9925 GN=SLC25A31 PE=4 SV=1	SLC25A31	33.829	29.5	9	14	8	1.551	0.789	1.431	1.269	0.781	0.67	1.102	0.73	0.724	1.264	0.771	0.23352
A0A452F216	estradiol 17-beta-dehydrogenase 8(predicted) OS=Capra hircus OX=9925 GN=HSD17B8 PE=4 SV=1	HSD17B8	25.321	6.9	1	1	1	0.904	1.294	1.043	1.076	1.251	0.89	0.966	1.178	0.953	0.922	0.882	0.170543
A0A452F244	Protein-tyrosine sulfotransferase(predicted) OS=Capra hircus OX=9925 GN=TPST2 PE=4 SV=1	TPST2	41.89	17.8	6	7	6	1.157	1.016	1.307	1.057	1.178	0.753	1.174	1.009	0.945	0.816	0.822	0.052503
A0A452F251	Protocadherin Fat 1(predicted) OS=Capra hircus OX=9925 GN=FAT1 PE=4 SV=1	FAT1	483.95	1.8	7	8	7	0.867	1.237	1.23	1.002	1.093	0.828	0.97	1.396	1.032	0.814	0.928	0.49004
A0A452F283	SLC3A2 protein(predicted) OS=Capra hircus OX=9925 GN=SLC3A2 PE=4 SV=1	SLC3A2	63.29	30	13	22	13	1.047	1.2	1.173	1.064	1.138	1.022	0.814	1.198	1	0.788	0.858	0.080621
A0A452F294	Serine/threonine-protein phosphatase 2A 56 kDa regulatory subunit(predicted) OS=Capra hircus OX=9925 GN=PPP2R5A PE=4 SV=1	PPP2R5A	57.125	7.1	3	3	3	1.195	1.189	1.209	0.992	1.277	0.963	0.956	0.727	0.828	0.852	0.738	0.00188311
A0A452F2A8	Serine racemase(predicted) OS=Capra hircus OX=9925 GN=SRR PE=4 SV=1	SRR	35.967	12.6	3	3	3	0.677	0.6	0.439	0.712	0.499	1.054	2.293	0.845	1.255	1.908	2.513	0.0029448
A0A452F2B0	Disintegrin and metalloproteinase domain-containing protein 18(predicted) OS=Capra hircus OX=9925 GN=LOC108634067 PE=4 SV=1	LOC108634067	71.757	26.1	16	38	15	1.504	1.092	1.568	1.391	1.466	0.769	0.656	0.531	0.628	0.767	0.477	4.4514e-05
A0A452F2B2	Guanine nucleotide-binding protein G(O) subunit alpha(predicted) OS=Capra hircus OX=9925 GN=GNAO1 PE=4 SV=1	GNAO1	40.183	6.8	2	3	1
A0A452F2C3	Zinc finger protein 646(predicted) OS=Capra hircus OX=9925 GN=ZNF646 PE=4 SV=1	ZNF646	199.41	0.5	1	4	1	0.62	1.108	1.143	1.238	1.262	0.862	1.073	1.161	0.934	0.866	0.912	0.64604
A0A452F2C6	Ezrin(predicted) OS=Capra hircus OX=9925 GN=EZR PE=4 SV=1	EZR	68.786	37.9	27	43	18	0.766	0.937	0.822	0.798	1.157	1.41	0.832	1.044	1.559	1.073	1.321	0.085536
A0A452F2D6	Cylicin 2(predicted) OS=Capra hircus OX=9925 PE=4 SV=1	---	46.143	30.2	11	20	11	2.287	1.395	1.217	2.057	1.37	0.268	0.345	0.379	0.342	0.377	0.206	1.8141e-06
A0A452F2G7	Succinate dehydrogenase [ubiquinone] flavoprotein subunit, mitochondrial(predicted) OS=Capra hircus OX=9925 GN=SDHA PE=4 SV=1	SDHA	72.974	18.3	10	12	10	1.648	1.049	1.011	1.216	0.816	1.05	0.853	0.59	0.684	1.332	0.786	0.2069
A0A452F2I0	Pantetheinase(predicted) OS=Capra hircus OX=9925 GN=VNN1 PE=4 SV=1	VNN1	57.435	6.2	3	3	3	1.826	0.843	1.56	1.922	0.76	0.407	0.675	1.141	0.58	0.804	0.522	0.040817
A0A452F2K7	Superoxide dismutase 3 OS=Capra hircus OX=9925 GN=SOD3 PE=4 SV=1	SOD3	25.898	12.1	2	2	2	1.114	0.958	0.986	1.388	0.978	0.631	0.996	1.524	0.665	1.267	0.937	0.55826
A0A452F2L8	Creatine kinase B-type (Fragment)(predicted) OS=Capra hircus OX=9925 GN=CKB PE=4 SV=1	CKB	42.709	32	8	9	8	0.776	1.16	1.265	0.801	1.232	0.749	1.002	1.041	1.307	0.964	0.967	0.85428
A0A452F2M1	GLIPR1-like protein 1(predicted) OS=Capra hircus OX=9925 GN=GLIPR1L1 PE=4 SV=1	GLIPR1L1	31.868	60.9	17	70	17	1.184	1.171	1.134	1.095	1.359	0.938	0.793	0.616	0.725	1.211	0.721	0.043921
A0A452F2M2	T-complex protein 1 subunit theta(predicted) OS=Capra hircus OX=9925 GN=CCT8 PE=4 SV=1	CCT8	59.637	59.1	37	121	37	0.776	0.798	0.64	0.82	0.725	1.828	1.302	0.904	1.113	1.398	1.741	0.0028755
A0A452F2M3	Nodal modulator 1 (Fragment)(predicted) OS=Capra hircus OX=9925 GN=LOC102178324 PE=4 SV=1	LOC102178324	129.84	2.4	3	3	3	1.033	1.128	1.011	1.002	1.181	0.961	1.132	1.083	1.004	0.917	0.952	0.34854
A0A452F2P9	c-Myc-binding protein(predicted) OS=Capra hircus OX=9925 GN=MYCBP PE=4 SV=1	MYCBP	11.997	73.8	8	15	8	0.952	1.041	0.819	0.865	0.956	1.357	1.353	1.002	0.918	1.153	1.248	0.043677
A0A452F2T1	Ribose-phosphate pyrophosphokinase 1 (Fragment)(predicted) OS=Capra hircus OX=9925 GN=LOC102173923 PE=4 SV=1	LOC102173923	34.834	48.1	16	25	11	0.937	1.209	0.884	0.914	1.054	0.699	1.142	1.097	1.162	1.088	1.038	0.811
A0A452F2U7	Fibulin-1(predicted) OS=Capra hircus OX=9925 GN=FBLN1 PE=4 SV=1	FBLN1	75.054	18.4	9	2	2	1.31	1.079	0.877	1.53	1.207	1.398	0.798	0.717	0.904	0.613	0.738	0.086762
A0A452F2V0	Signal peptide, CUB domain and EGF like domain containing 1(predicted) OS=Capra hircus OX=9925 GN=SCUBE1 PE=4 SV=1	SCUBE1	107.6	7.2	5	6	5	1.725	1.111	1.218	1.623	1.285	0.479	0.698	0.882	0.926	0.73	0.534	0.0021804
A0A452F2V9	V-type proton ATPase subunit C(predicted) OS=Capra hircus OX=9925 GN=ATP6V1C1 PE=4 SV=1	ATP6V1C1	43.959	39	16	24	16	0.723	0.873	0.773	0.769	0.819	1.354	1.618	1.007	1.167	1.19	1.601	0.00067826
A0A452F2Y0	Retinal dehydrogenase 1(predicted) OS=Capra hircus OX=9925 GN=ALDH1A1 PE=4 SV=1	ALDH1A1	53.63	22	9	9	8	0.841	0.912	0.834	0.884	1.101	1.386	0.883	0.966	1.393	1.207	1.276	0.060044
A0A452F2Y2	FUN14 domain-containing protein 2(predicted) OS=Capra hircus OX=9925 PE=4 SV=1	---	19.752	30.2	5	7	0
A0A452F2Z2	Beta A globin chain(predicted) OS=Capra hircus OX=9925 GN=LOC102175876 PE=4 SV=1	LOC102175876	15.747	15.4	2	3	2	0.97	0.745	3.04	0.747	0.729	0.54	0.626	1.486	0.934	0.822	0.707	0.50648
A0A452F316	Cytochrome b-c1 complex subunit 7(predicted) OS=Capra hircus OX=9925 PE=4 SV=1	---	12.609	9.4	1	1	1	0.933	0.969	1.221	0.904	0.916	0.821	1	1.65	1.085	1.043	1.133	0.4397
A0A452F327	Heat shock 90 kDa protein 1 (Fragment)(predicted) OS=Capra hircus OX=9925 GN=HSP90AB1 PE=4 SV=1	HSP90AB1	83.252	36.2	28	52	13	0.888	0.83	0.798	0.95	0.832	1.262	1.293	1.039	1.127	1.236	1.386	0.00021731
A0A452F333	Cadherin 1(predicted) OS=Capra hircus OX=9925 GN=CDH1 PE=4 SV=1	CDH1	98.223	17.9	14	30	14	0.997	1.006	1.211	1.007	1.039	0.809	0.962	1.429	1.041	0.975	0.992	0.81854
A0A452F334	Glycerol-3-phosphate dehydrogenase(predicted) OS=Capra hircus OX=9925 GN=GPD2 PE=4 SV=1	GPD2	80.811	13.8	9	12	9	1.545	0.852	1.988	1.421	0.9	0.576	0.763	0.879	0.685	0.911	0.569	0.020743
A0A452F361	Alpha-N-acetylgalactosaminide alpha-2,6-sialyltransferase 2(predicted) OS=Capra hircus OX=9925 PE=4 SV=1	---	30.186	17.1	3	6	3	1.482	1.211	0.953	1.042	1.754	0.779	0.673	0.67	0.833	0.716	0.57	0.00197787
A0A452F375	Glutathione peroxidase(predicted) OS=Capra hircus OX=9925 GN=GPX1 PE=4 SV=1	GPX1	20.192	12.4	2	2	2	0.718	0.9	0.752	0.807	1.521	1.411	1.052	1.044	0.976	1.234	1.217	0.171075
A0A452F3A7	DCC-interacting protein 13-alpha isoform X1(predicted) OS=Capra hircus OX=9925 GN=APPL1 PE=4 SV=1	APPL1	79.669	2.3	2	2	2	1.148	0.777	0.846	1.367	0.824	1.289	1.238	0.958	0.916	1.062	1.101	0.41072
A0A452F3B7	IQ motif containing with AAA domain 1 like(predicted) OS=Capra hircus OX=9925 GN=IQCA1L PE=4 SV=1	IQCA1L	94.585	2.9	2	2	2	0.775	1.079	0.976	0.923	0.79	0.852	1.215	1.447	1.104	1.319	1.307	0.046675
A0A452F3B8	LOW QUALITY PROTEIN: T-complex protein 11 homolog(predicted) OS=Capra hircus OX=9925 GN=TCP11 PE=4 SV=1	TCP11	56.903	17.4	7	7	7	1.906	0.666	0.77	2.322	0.643	1.524	0.548	0.886	0.734	0.648	0.688	0.4104
A0A452F3D0	collagen alpha-2(VI) chain isoform X1(predicted) OS=Capra hircus OX=9925 GN=COL6A2 PE=4 SV=1	COL6A2	109.39	8.6	7	10	7	0.964	1.109	1.195	0.964	1.134	0.72	1.069	1.429	0.937	0.788	0.921	0.42362
A0A452F3E6	Ubiquitin-like modifier-activating enzyme 6(predicted) OS=Capra hircus OX=9925 GN=UBA6 PE=4 SV=1	UBA6	118.98	28.7	27	34	27	0.813	0.771	0.733	0.806	0.738	1.256	1.449	1.087	1.229	1.366	1.654	1.71175e-05
A0A452F3F6	60S ribosomal protein L27a(predicted) OS=Capra hircus OX=9925 GN=RPL27A PE=4 SV=1	RPL27A	16.604	27	4	4	4	1.198	0.962	0.949	1.966	0.816	0.99	0.945	0.919	0.862	0.838	0.773	0.25532
A0A452F3H8	Exportin 1(predicted) OS=Capra hircus OX=9925 GN=XPO1 PE=4 SV=1	XPO1	123.14	25.8	24	40	24	0.871	0.993	0.759	0.909	0.892	1.336	1.328	0.989	1.035	1.115	1.312	0.0079381
A0A452F3K6	5',3'-nucleotidase, mitochondrial(predicted) OS=Capra hircus OX=9925 GN=NT5M PE=4 SV=1	NT5M	25.795	10.7	2	2	2	1.047	1.306	0.935	0.978	1.251	1.025	0.953	0.804	0.971	1.134	0.886	0.21032
A0A452F3L4	ATP-binding cassette sub-family A member 3-like(predicted) OS=Capra hircus OX=9925 PE=4 SV=1	---	18.768	40.1	7	14	7	1.225	1.077	1.154	1.17	1.2	0.898	0.918	0.891	0.888	0.954	0.781	1.57137e-05
A0A452F3L8	Tubulin alpha chain(predicted) OS=Capra hircus OX=9925 GN=TUBA1B PE=4 SV=1	TUBA1B	50.151	41.5	15	46	0
A0A452F3M1	Importin 5(predicted) OS=Capra hircus OX=9925 GN=IPO5 PE=4 SV=1	IPO5	123.54	28.7	26	43	26	1.542	0.746	0.711	1.794	0.777	1.725	0.637	0.867	0.701	0.655	0.823	0.50138
A0A452F3R4	Coiled-coil domain-containing protein 105(predicted) OS=Capra hircus OX=9925 GN=CCDC105 PE=4 SV=1	CCDC105	57.544	1.8	1	1	1	1.548	2.238	1.241	1.705	2.054	0.24	0.292	0.371	0.348	0.393	0.187	9.9678e-07
A0A452F3U3	T-complex protein 1 subunit epsilon(predicted) OS=Capra hircus OX=9925 GN=CCT5 PE=4 SV=1	CCT5	59.628	62.8	39	106	39	0.751	0.794	0.673	0.784	0.717	1.863	1.318	0.903	1.102	1.404	1.772	0.0121383
A0A452F3V6	Trans-1,2-dihydrobenzene-1,2-diol dehydrogenase(predicted) OS=Capra hircus OX=9925 GN=DHDH PE=4 SV=1	DHDH	36.485	31.3	7	8	7	0.95	0.65	0.635	1.006	0.571	1.62	2.129	0.711	1.053	0.895	1.681	0.077599
A0A452F3X9	Prominin 2(predicted) OS=Capra hircus OX=9925 GN=PROM2 PE=4 SV=1	PROM2	91.664	23.3	19	39	19	0.873	1.225	0.867	0.892	1.359	1.148	0.839	1.156	1.198	0.865	0.998	0.96718
A0A452F406	Epididymis luminal protein 32(predicted) OS=Capra hircus OX=9925 GN=DSTN PE=4 SV=1	DSTN	18.506	22.4	3	3	2	1.037	0.94	1.181	1.043	1.022	1.12	0.986	1.062	1.137	0.933	1.003	0.95952
A0A452F429	Ubiquitin carboxyl-terminal hydrolase(predicted) OS=Capra hircus OX=9925 GN=UCHL3 PE=4 SV=1	UCHL3	26.209	51.3	10	16	10	0.886	0.901	0.707	0.821	0.984	1.258	1.276	1.079	1.118	1.278	1.398	0.00092157
A0A452F430	Aminopeptidase (Fragment)(predicted) OS=Capra hircus OX=9925 GN=ERAP2 PE=4 SV=1	ERAP2	110.21	27.2	26	41	26	1.022	0.732	1.326	1.016	0.721	0.729	0.955	1.454	1.265	1.148	1.152	0.42058
A0A452F443	Sterile alpha motif domain containing 15(predicted) OS=Capra hircus OX=9925 GN=SAMD15 PE=4 SV=1	SAMD15	71.149	4	2	2	2	1.061	1.252	0.689	1.132	1.278	1.171	1.04	0.756	0.977	1.032	0.919	0.60978
A0A452F4B1	DPP7 protein(predicted) OS=Capra hircus OX=9925 GN=DPP7 PE=4 SV=1	DPP7	53.831	23.6	8	13	8	1.273	1.194	1.067	1.153	1.193	1.028	0.956	0.684	0.825	0.881	0.744	0.0038249
A0A452F4B6	Valosin containing protein(predicted) OS=Capra hircus OX=9925 GN=VCP PE=4 SV=1	VCP	89.302	43.7	34	89	34	0.97	1.179	0.801	0.985	1.116	0.659	1.192	0.909	1.108	1.333	1.03	0.94922
A0A452F4D1	Odorant-binding protein-like(predicted) OS=Capra hircus OX=9925 GN=LOC102186944 PE=4 SV=1	LOC102186944	19.46	6.4	1	1	1
A0A452F4D3	Cystatin-B(predicted) OS=Capra hircus OX=9925 GN=LOC102186806 PE=4 SV=1	LOC102186806	11.453	36.6	4	4	4	1.07	0.976	1.087	1.173	0.996	1.315	0.853	1.011	1.166	0.952	0.999	0.90294
A0A452F4G7	Deoxyribonuclease-2-alpha(predicted) OS=Capra hircus OX=9925 GN=DNASE2 PE=4 SV=1	DNASE2	41.203	22.5	10	16	10	1.022	1.094	1.135	1.038	1.032	0.999	0.975	1.157	1.08	0.872	0.955	0.3686
A0A452F4L3	Fibrinogen alpha chain OS=Capra hircus OX=9925 GN=FGA PE=4 SV=1	FGA	66.998	28.3	19	23	19	0.809	0.922	2.573	0.722	0.886	0.569	0.806	1.339	0.85	0.781	0.735	0.43398
A0A452F4Q3	Sperm-associated acrosin inhibitor(predicted) OS=Capra hircus OX=9925 PE=4 SV=1	---	9.8242	52.9	6	32	6	0.732	0.814	1.069	0.778	0.83	0.925	1.223	1.325	0.93	1.476	1.392	0.022836
A0A452F4Q5	Dynein axonemal heavy chain 8(predicted) OS=Capra hircus OX=9925 GN=DNAH8 PE=4 SV=1	DNAH8	540.98	9.6	46	53	45	1.753	1.058	1.231	1.682	1.259	0.567	0.646	0.753	0.688	0.631	0.47	0.000124808
A0A452F4R1	Dynein heavy chain 2, axonemal (Fragment)(predicted) OS=Capra hircus OX=9925 GN=DNAH2 PE=4 SV=1	DNAH2	501.93	1.5	5	5	4	1.785	0.882	1.428	2.452	0.847	0.449	0.744	0.516	0.733	0.585	0.409	0.0064397
A0A452F4R4	NFX1-type zinc finger-containing protein 1(predicted) OS=Capra hircus OX=9925 GN=ZNFX1 PE=4 SV=1	ZNFX1	218.83	1.2	2	2	2	1.002	0.896	1.11	0.849	0.902	0.892	0.922	1.4	1.368	1.141	1.203	0.145345
A0A452F4R6	Isocitrate dehydrogenase [NADP](predicted) OS=Capra hircus OX=9925 GN=IDH1 PE=4 SV=1	IDH1	46.768	61.1	22	37	20	1.088	1.052	0.829	1.093	1.036	1.235	1.113	0.84	0.94	1.194	1.044	0.6873
A0A452F4R8	Aquaporin-9(predicted) OS=Capra hircus OX=9925 GN=AQP9 PE=4 SV=1	AQP9	31.831	2.7	1	3	1	0.899	0.997	0.955	0.866	0.97	0.839	0.979	1.151	1.715	1.054	1.224	0.23076
A0A452F4V0	Ectonucleotide pyrophosphatase/phosphodiesterase family member 2(predicted) OS=Capra hircus OX=9925 GN=ENPP2 PE=4 SV=1	ENPP2	98.336	32.8	25	35	24	0.924	1.096	0.932	0.899	1.154	1.667	0.967	0.895	0.951	0.867	1.068	0.77382
A0A452F4X2	Maestro heat-like repeat-containing protein family member 1(predicted) OS=Capra hircus OX=9925 GN=MROH1 PE=4 SV=1	MROH1	177.78	27.7	39	66	39	0.721	0.758	0.8	0.742	0.709	1.263	1.562	1.112	1.211	1.411	1.758	2.049e-05
A0A452F4X9	Lactoylglutathione lyase(predicted) OS=Capra hircus OX=9925 GN=GLO1 PE=4 SV=1	GLO1	20.778	43.5	7	9	7	0.974	0.966	0.766	0.95	0.983	1.64	1.229	0.836	0.86	1.142	1.23	0.2129
A0A452F4Y0	RAB11 binding and LisH domain, coiled-coil and HEAT repeat containing(predicted) OS=Capra hircus OX=9925 GN=RELCH PE=4 SV=1	RELCH	133.85	14.1	12	19	12	0.804	0.818	1.089	0.681	0.78	1.12	1.288	1.11	1.153	1.449	1.467	0.0028586
A0A452F4Y7	DNA helicase MCM9(predicted) OS=Capra hircus OX=9925 GN=MCM9 PE=4 SV=1	MCM9	121.79	0.7	1	2	1	0.977	1.216	1.383	1.032	0.992	0.787	0.889	1.154	1.266	0.793	0.873	0.25474
A0A452F509	ATP synthase subunit gamma, mitochondrial(predicted) OS=Capra hircus OX=9925 GN=ATP5F1C PE=4 SV=1	ATP5F1C	33.086	16.1	5	6	5	1.456	1.06	1.223	1.396	0.888	0.599	1.04	0.727	0.784	1.077	0.702	0.035525
A0A452F550	26S proteasome non-ATPase regulatory subunit 7 isoform X2(predicted) OS=Capra hircus OX=9925 GN=PSMD7 PE=4 SV=1	PSMD7	36.738	21.4	7	7	7	0.871	0.81	0.719	0.776	0.848	1.332	1.439	0.974	1.227	1.3	1.559	0.0003755
A0A452F577	Ubiquitin-associated domain-containing protein 1 (Fragment)(predicted) OS=Capra hircus OX=9925 GN=UBAC1 PE=4 SV=1	UBAC1	45.126	7.5	3	4	3	0.841	0.921	0.698	0.896	0.718	1.356	1.292	0.821	1.297	1.518	1.542	0.0080791
A0A452F578	Xylosyltransferase 2(predicted) OS=Capra hircus OX=9925 GN=XYLT2 PE=4 SV=1	XYLT2	96.762	4.2	3	5	3	0.837	1.333	1.255	0.903	1.158	0.854	0.834	1.052	1.157	1.013	0.895	0.38466
A0A452F585	Serine/threonine-protein phosphatase 2A activator(predicted) OS=Capra hircus OX=9925 GN=PTPA PE=4 SV=1	PTPA	36.173	45.1	13	28	13	0.991	0.966	0.882	1.042	0.971	1.31	1.094	0.976	1.005	1.078	1.126	0.083603
A0A452F5A1	Myelin protein zero-like protein 2(predicted) OS=Capra hircus OX=9925 GN=MPZL2 PE=4 SV=1	MPZL2	24.432	10.7	2	2	2	0.992	1.335	1.102	1.02	1.119	0.758	0.971	1.462	0.912	0.857	0.891	0.29842
A0A452F5B1	Semaphorin-3D(predicted) OS=Capra hircus OX=9925 GN=SEMA3D PE=4 SV=1	SEMA3D	89.482	4.4	3	3	3	0.798	1.182	1.126	0.756	1.441	0.695	1	1.614	1.086	0.837	0.987	0.89586
A0A452F5D8	Enolase 2(predicted) OS=Capra hircus OX=9925 GN=ENO2 PE=4 SV=1	ENO2	46.587	27.6	9	11	3	0.599	0.828	0.619	1.262	1.043	0.993	1.405	1.272	1.185	1.218	1.396	0.045022
A0A452F5G1	Leukocyte elastase inhibitor(predicted) OS=Capra hircus OX=9925 GN=SERPINB1 PE=4 SV=1	SERPINB1	42.185	24.7	9	16	8	1.272	1.065	1.032	1.688	1.092	1.014	0.709	0.86	0.802	0.761	0.674	0.0079843
A0A452F5G4	Protein disulfide-isomerase-like protein of the testis(predicted) OS=Capra hircus OX=9925 GN=PDILT PE=4 SV=1	PDILT	66.651	16.1	9	15	9	2.022	0.63	0.594	2.11	0.644	1.785	0.573	0.646	0.655	0.479	0.69	0.41642
A0A452F5G7	unconventional myosin-VI isoform X4(predicted) OS=Capra hircus OX=9925 GN=MYO6 PE=4 SV=1	MYO6	145.11	8.4	10	12	10	0.833	0.876	0.73	0.968	0.84	0.943	1.379	1.057	1.227	1.349	1.402	0.0047846
A0A452F5H3	BEN domain containing 7(predicted) OS=Capra hircus OX=9925 GN=BEND7 PE=4 SV=1	BEND7	46.053	2.7	2	3	2	0.654	1.039	1.324	1.05	0.923	1.469	0.877	1.161	1.355	0.655	1.106	0.6669
A0A452F5H7	Neprilysin(predicted) OS=Capra hircus OX=9925 GN=MME PE=4 SV=1	MME	85.828	33.9	25	40	25	1.151	1.015	0.91	1.189	1.137	1.473	0.724	0.869	1.179	0.823	0.938	0.51858
A0A452F5I1	Chromosome 14 open reading frame 166 ortholog(predicted) OS=Capra hircus OX=9925 GN=RTRAF PE=4 SV=1	RTRAF	28.179	3.3	1	1	1	0.86	1.422	1.135	1.343	1.179	1.222	0.725	0.794	1.078	0.694	0.76	0.079799
A0A452F5I4	Fatty acid synthase OS=Capra hircus OX=9925 GN=FASN PE=4 SV=1	FASN	270.33	4	10	10	10	0.906	0.848	1.088	0.857	0.922	0.991	1.342	1.106	1.132	1.091	1.225	0.0160179
A0A452F5I8	ATP-binding cassette sub-family A member 3-like(predicted) OS=Capra hircus OX=9925 GN=LOC106503575 PE=4 SV=1	LOC106503575	19.133	20.7	3	6	3	1.263	1.175	1.592	1.2	1.295	0.926	0.902	0.643	0.749	0.765	0.611	0.00041916
A0A452F5J4	Prostaglandin reductase 2(predicted) OS=Capra hircus OX=9925 GN=PTGR2 PE=4 SV=1	PTGR2	38.437	34.2	8	17	8	0.811	0.838	0.833	0.907	0.961	1.344	1.38	0.96	1.059	1.097	1.343	0.0058833
A0A452F5L1	Prostasin(predicted) OS=Capra hircus OX=9925 GN=PRSS8 PE=4 SV=1	PRSS8	36.857	44.3	11	33	11	1.037	1.041	1.118	0.973	1.104	1.267	0.971	1.023	1.007	0.918	0.984	0.72866
A0A452F5Q1	Activating transcription factor 6(predicted) OS=Capra hircus OX=9925 GN=ATF6 PE=4 SV=1	ATF6	71.918	2.9	2	2	2	0.871	0.827	1.592	0.698	0.856	0.942	0.947	1.327	1.263	1.178	1.168	0.26664
A0A452F5Q3	STXBP2(predicted) OS=Capra hircus OX=9925 GN=STXBP2 PE=4 SV=1	STXBP2	66.168	41	24	38	7	0.949	0.923	1.164	0.964	1.096	1.034	0.958	1.116	1.056	1.032	1.02	0.675
A0A452F5S0	Inositol 1,4,5-trisphosphate receptor type 1(predicted) OS=Capra hircus OX=9925 GN=ITPR1 PE=4 SV=1	ITPR1	308.53	0.3	1	1	1	0.643	0.619	0.984	0.675	0.527	1.194	1.446	1.887	1.194	1.366	2.055	0.00059742
A0A452F5S1	small VCP/p97-interacting protein(predicted) OS=Capra hircus OX=9925 GN=SVIP PE=4 SV=1	SVIP	8.4756	15.6	2	2	2
A0A452F5S2	Neuromodulin (Fragment)(predicted) OS=Capra hircus OX=9925 GN=GAP43 PE=4 SV=1	GAP43	22.872	13.2	2	2	2	1.099	1.197	0.965	1	1.203	1.202	1.125	0.819	0.889	0.923	0.907	0.26022
A0A452F5S4	Zinc finger protein 800 (Fragment)(predicted) OS=Capra hircus OX=9925 GN=ZNF800 PE=4 SV=1	ZNF800	75.134	1.4	1	1	1	0.91	1.312	1.849	0.981	1.443	0.497	1.013	1.144	0.707	0.669	0.62	0.039259
A0A452F5W4	Adenine phosphoribosyltransferase(predicted) OS=Capra hircus OX=9925 GN=APRT PE=4 SV=1	APRT	19.527	28.9	4	5	4	0.806	0.802	0.736	0.972	1.003	1.102	1.164	1.329	0.972	1.208	1.337	0.0061183
A0A452F5X7	Biphenyl hydrolase like(predicted) OS=Capra hircus OX=9925 GN=BPHL PE=4 SV=1	BPHL	32.579	5.2	2	2	2	1.006	0.908	1.114	0.882	0.952	0.784	1.021	1.302	1.101	1.387	1.151	0.2858
A0A452F5Y6	TBC1 domain family member 24(predicted) OS=Capra hircus OX=9925 GN=TBC1D24 PE=4 SV=1	TBC1D24	57.786	2	1	1	1	0.868	0.72	0.843	1.099	0.887	1.415	1.273	0.986	1.239	1.084	1.358	0.0106403
A0A452F5Y9	Plastin-3(predicted) OS=Capra hircus OX=9925 GN=PLS3 PE=4 SV=1	PLS3	70.797	38.3	22	34	15	0.563	0.91	0.652	0.66	1.025	1.717	1.218	1.042	1.123	1.362	1.696	0.0053568
A0A452F627	factor VIII intron 22 protein(predicted) OS=Capra hircus OX=9925 GN=LOC106503805 PE=4 SV=1	LOC106503805	38.74	7.3	2	2	2	0.812	0.861	1.274	0.863	0.935	1.182	1.264	1.25	1.087	0.961	1.211	0.068803
A0A452F644	Brain-specific serine protease 4 (Fragment)(predicted) OS=Capra hircus OX=9925 GN=PRSS22 PE=4 SV=1	PRSS22	35.697	39.2	9	15	9	0.922	1.136	1.206	0.974	0.953	0.739	0.958	1.423	1.069	0.956	0.991	0.83156
A0A452F651	putative spermatogenesis-associated protein 31D4(predicted) OS=Capra hircus OX=9925 PE=4 SV=1	---	170.86	0.5	1	1	1
A0A452F678	inactive N-acetylated-alpha-linked acidic dipeptidase-like protein 2(predicted) OS=Capra hircus OX=9925 GN=NAALADL2 PE=4 SV=1	NAALADL2	82.66	2	1	1	1
A0A452F684	Histidine triad nucleotide-binding protein 1(predicted) OS=Capra hircus OX=9925 GN=HINT1 PE=4 SV=1	HINT1	13.779	18.3	4	5	4	0.881	0.88	0.558	0.964	1.043	1.711	1.276	0.836	1.047	1.05	1.368	0.095741
A0A452F6C4	Cadherin-2(predicted) OS=Capra hircus OX=9925 GN=CDH2 PE=4 SV=1	CDH2	99.909	2.8	2	3	2	0.83	1.33	1.491	0.82	1.401	0.548	1.073	0.829	0.991	1.107	0.775	0.20838
A0A452F6D5	WD repeat-containing protein 64(predicted) OS=Capra hircus OX=9925 GN=WDR64 PE=4 SV=1	WDR64	72.833	3.5	2	3	2	1.634	1.096	1.047	1.481	1.398	0.514	0.54	0.838	0.978	0.896	0.566	0.0061411
A0A452F6E3	Solute carrier family 2, facilitated glucose transporter member 5(predicted) OS=Capra hircus OX=9925 GN=LOC106501911 PE=4 SV=1	LOC106501911	52.805	8	4	10	2	1.284	1.243	1.722	1.09	1.433	0.688	0.701	0.831	0.686	0.8	0.547	0.000136228
A0A452F6E5	Succinate--CoA ligase [ADP-forming] subunit beta, mitochondrial(predicted) OS=Capra hircus OX=9925 GN=SUCLA2 PE=4 SV=1	SUCLA2	50.191	26.1	11	16	11	1.244	0.918	0.821	0.975	0.967	1.235	0.962	0.767	0.979	1.391	1.083	0.60016
A0A452F6E7	protein NDRG3 isoform X2(predicted) OS=Capra hircus OX=9925 GN=NDRG3 PE=4 SV=1	NDRG3	39.798	18.2	5	10	5	0.856	0.811	0.727	0.766	0.738	1.389	1.61	0.942	1.199	1.2	1.626	0.00102166
A0A452F6F4	Galactocerebrosidase(predicted) OS=Capra hircus OX=9925 GN=GALC PE=4 SV=1	GALC	77.787	2.2	1	1	1
A0A452F6G1	Phospholipid-transporting ATPase(predicted) OS=Capra hircus OX=9925 GN=LOC102190971 PE=4 SV=1	LOC102190971	130.28	15.3	16	19	16	1.064	1.073	1.095	1.075	1.211	0.988	0.97	0.885	0.953	1.027	0.874	0.0044169
A0A452F6I1	nardilysin isoform X1(predicted) OS=Capra hircus OX=9925 GN=NRDC PE=4 SV=1	NRDC	130.71	5.8	5	5	5	1.656	0.909	1.146	1.839	0.842	0.895	0.635	0.735	0.83	0.837	0.615	0.029477
A0A452F6I3	Phosphoglucomutase-1(predicted) OS=Capra hircus OX=9925 GN=PGM1 PE=4 SV=1	PGM1	61.573	25.4	12	15	12	1.017	1.152	0.983	1.046	1.154	0.982	1.334	0.817	1.033	0.933	0.953	0.51206
A0A452F6J9	Selenoprotein V (Fragment)(predicted) OS=Capra hircus OX=9925 GN=SELENOV PE=4 SV=1	SELENOV	37.217	3.4	1	4	1	0.855	1.09	0.777	0.897	1.51	1.532	0.977	0.819	0.874	1.47	1.106	0.60662
A0A452F6L0	Ectonucleotide pyrophosphatase/phosphodiesterase family member 5 (Fragment)(predicted) OS=Capra hircus OX=9925 GN=ENPP5 PE=4 SV=1	ENPP5	54.398	7.3	3	4	3	1.066	1.111	1.156	1.018	1.155	0.755	0.744	0.984	0.928	0.806	0.766	0.002141
A0A452F6L5	MARCH7 protein(predicted) OS=Capra hircus OX=9925 GN=MARCH7 PE=4 SV=1	MARCH7	75.776	1.3	1	1	1	1.01	1.183	0.98	1	1.23	1.05	1.072	1.021	0.927	0.974	0.934	0.26106
A0A452F6P6	Keratin, type II cytoskeletal 8(predicted) OS=Capra hircus OX=9925 GN=KRT8 PE=4 SV=1	KRT8	52.892	24.4	11	9	3	1.012	1.17	1.651	1.15	1.324	0.614	0.78	0.982	0.788	0.881	0.641	0.0046373
A0A452F6Q8	Pantothenate kinase 4(predicted) OS=Capra hircus OX=9925 GN=PANK4 PE=4 SV=1	PANK4	82.631	1.9	1	1	1
A0A452F6U0	Polypeptide N-acetylgalactosaminyltransferase(predicted) OS=Capra hircus OX=9925 GN=GALNT1 PE=4 SV=1	GALNT1	64.218	9.5	5	5	5	0.992	1.165	1.046	0.972	1.078	0.955	0.862	0.964	1.063	1.07	0.935	0.22216
A0A452F6V7	Complement factor D(predicted) OS=Capra hircus OX=9925 GN=CFD PE=4 SV=1	CFD	27.911	25.1	4	6	4	0.931	1.173	1.21	1.024	1.227	0.818	0.954	1.176	1.12	0.869	0.887	0.198978
A0A452F6W7	Seminal vesicle protein(predicted) OS=Capra hircus OX=9925 GN=LOC108638072 PE=4 SV=1	LOC108638072	18.008	61.8	19	286	9	1.041	1.062	1.262	1.051	0.98	0.706	0.865	1.361	1.041	0.962	0.915	0.3744
A0A452F6X6	MKIAA0109 protein (Fragment)(predicted) OS=Capra hircus OX=9925 GN=AP2M1 PE=4 SV=1	AP2M1	49.389	5.5	2	2	2
A0A452F711	Peptidylprolyl isomerase(predicted) OS=Capra hircus OX=9925 GN=FKBP3 PE=4 SV=1	FKBP3	25.191	7.1	2	2	2	1.429	0.735	0.821	2.021	0.719	1.744	0.671	0.899	0.823	0.613	0.83	0.55202
A0A452F714	Phosphatidylethanolamine-binding protein 4(predicted) OS=Capra hircus OX=9925 GN=PEBP4 PE=4 SV=1	PEBP4	25.088	38.6	8	36	8	0.951	1.077	0.98	0.881	1.179	1.07	1.184	0.977	0.932	0.886	0.996	0.95748
A0A452F719	MANF(predicted) OS=Capra hircus OX=9925 GN=MANF PE=4 SV=1	MANF	20.325	40.2	7	11	7	1.643	0.869	0.74	1.576	0.868	1.538	0.738	0.806	0.795	0.782	0.818	0.41228
A0A452F727	Syntaxin-binding protein 2(predicted) OS=Capra hircus OX=9925 PE=4 SV=1	---	61.196	28.3	20	32	3	0.806	0.923	0.8	0.81	0.768	0.992	1.267	1.207	1.333	1.505	1.535	0.0005021
A0A452F797	PPP1R11(predicted) OS=Capra hircus OX=9925 GN=PPP1R11 PE=4 SV=1	PPP1R11	13.889	12.7	1	1	1
A0A452F7E9	A disintegrin and metalloproteinase with thrombospondin motifs 19(predicted) OS=Capra hircus OX=9925 GN=ADAMTS19 PE=4 SV=1	ADAMTS19	132.92	5.5	7	7	7	0.729	0.858	1.176	0.789	0.911	0.884	0.667	2.174	1.011	1.228	1.336	0.33288
A0A452F7F0	Signal peptidase complex subunit 3(predicted) OS=Capra hircus OX=9925 GN=SPCS3 PE=4 SV=1	SPCS3	20.227	5	1	1	1	1.062	1.122	1.471	1.099	0.943	1.037	0.811	1.082	0.956	0.913	0.842	0.09972
A0A452F7F4	Palmitoyltransferase(predicted) OS=Capra hircus OX=9925 GN=ZDHHC20 PE=4 SV=1	ZDHHC20	41.606	5.3	1	1	1	1.242	1.026	1.366	1.427	1.022	0.669	0.866	0.984	0.923	0.935	0.72	0.0099639
A0A452F7G3	Mammalian ependymin-related protein 1(predicted) OS=Capra hircus OX=9925 GN=EPDR1 PE=4 SV=1	EPDR1	25.593	17.7	3	5	3	1.44	1.155	1.072	1.58	1.132	0.733	0.993	1.156	1.031	0.747	0.731	0.027376
A0A452F7K3	Dynein light chain(predicted) OS=Capra hircus OX=9925 GN=DNAL4 PE=4 SV=1	DNAL4	10.615	11	1	1	1	1.482	1.243	0.938	1.511	1.754	0.687	0.637	0.498	0.836	0.787	0.497	0.00114336
A0A452F7K6	Phospholipase A2 inhibitor and LY6/PLAUR domain containing(predicted) OS=Capra hircus OX=9925 GN=LOC108637993 PE=4 SV=1	LOC108637993	21.041	34	6	12	6	0.957	0.942	1.123	0.928	1.09	0.845	1.024	0.875	1.232	1.364	1.06	0.68076
A0A452F7M5	Proteasome subunit alpha type(predicted) OS=Capra hircus OX=9925 GN=PSMA8 PE=4 SV=1	PSMA8	27.938	60.4	14	20	11	1.116	0.966	0.934	1.067	0.966	1.33	1.057	0.861	0.973	1.07	1.048	0.63586
A0A452F7M8	Isochorismatase domain-containing protein 1(predicted) OS=Capra hircus OX=9925 GN=ISOC1 PE=4 SV=1	ISOC1	32.145	14.8	4	6	4	0.898	1.055	0.678	0.926	1.028	1.554	1.129	0.98	0.946	0.985	1.22	0.14956
A0A452F7P2	Short palate, lung and nasal epithelium carcinoma-associated protein 3(predicted) OS=Capra hircus OX=9925 GN=BPIFA3 PE=4 SV=1	BPIFA3	27.096	12.2	3	3	3	1.035	1.112	1.056	1.004	1.339	1.127	1.029	0.884	0.861	0.984	0.881	0.113901
A0A452F7S5	Beta-2-microglobulin(predicted) OS=Capra hircus OX=9925 GN=LOC102168547 PE=4 SV=1	LOC102168547	13.699	69.2	7	36	2	1.035	0.975	1.144	0.941	0.898	0.669	0.956	1.302	1.373	1.026	1.067	0.79162
A0A452F7S9	Tubulin alpha-3 chain(predicted) OS=Capra hircus OX=9925 GN=LOC102173837 PE=4 SV=1	LOC102173837	51.923	48.9	20	61	3	1.913	1.004	1.311	1.695	1.132	0.487	0.564	0.794	0.654	0.685	0.451	0.00072086
A0A452F7Z7	Endoplasmic reticulum oxidoreductase 1 beta(predicted) OS=Capra hircus OX=9925 GN=ERO1B PE=4 SV=1	ERO1B	52.642	9.2	4	4	3	1.134	0.946	0.965	0.942	0.876	1.267	0.929	0.949	1.054	1.354	1.142	0.18972
A0A452F815	nephronectin isoform X2(predicted) OS=Capra hircus OX=9925 GN=NPNT PE=4 SV=1	NPNT	64.908	32.4	18	25	1	0.716	1.271	0.932	0.69	0.952	1.046	1.334	1.347	1.127	1.064	1.298	0.053623
A0A452F824	MGC157332 protein(predicted) OS=Capra hircus OX=9925 GN=LUZP2 PE=4 SV=1	LUZP2	30.083	57.2	16	28	16	1.608	1.502	1.034	1.454	1.488	0.568	0.623	0.632	0.64	0.669	0.442	4.9468e-06
A0A452F825	Tubulin-specific chaperone E(predicted) OS=Capra hircus OX=9925 GN=TBCE PE=4 SV=1	TBCE	59.266	9.1	4	4	4	0.692	0.847	0.861	0.747	0.814	1.244	1.213	1.466	1.287	1.301	1.644	1.62639e-05
A0A452F834	Collagen alpha-1(XII) chain(predicted) OS=Capra hircus OX=9925 GN=COL12A1 PE=4 SV=1	COL12A1	325.17	20.5	47	56	47	1.159	0.752	0.975	1.109	0.755	1.567	1.194	1.289	0.69	0.933	1.194	0.38294
A0A452F853	Ubiquitin carboxyl-terminal hydrolase isozyme L1(predicted) OS=Capra hircus OX=9925 GN=UCHL1 PE=4 SV=1	UCHL1	24.938	30.5	6	11	6	0.817	0.999	0.676	0.885	0.974	1.46	1.356	0.88	1.18	1.084	1.37	0.026064
A0A452F862	Protein kinase X-linked(predicted) OS=Capra hircus OX=9925 GN=PRKX PE=4 SV=1	PRKX	39.701	6.1	2	2	2	0.723	0.708	0.576	0.656	0.655	1.252	1.529	1.113	1.463	1.688	2.123	2.0407e-05
A0A452F864	rab GTPase-binding effector protein 1 isoform X1(predicted) OS=Capra hircus OX=9925 GN=RABEP1 PE=4 SV=1	RABEP1	99.456	4.3	4	4	4	0.924	0.959	0.869	0.794	0.92	0.775	1.442	0.849	1.269	1.211	1.242	0.20212
A0A452F873	Cytochrome c oxidase subunit(predicted) OS=Capra hircus OX=9925 GN=COX6B2 PE=4 SV=1	COX6B2	10.519	47.7	4	6	4	1.455	1.021	1.312	1.463	1.028	0.634	0.786	0.913	0.837	0.911	0.65	0.0035432
A0A452F877	protein BRICK1(predicted) OS=Capra hircus OX=9925 GN=BRK1 PE=4 SV=1	BRK1	8.7308	12	1	1	1
A0A452F879	choline-phosphate cytidylyltransferase A(predicted) OS=Capra hircus OX=9925 GN=PCYT1A PE=4 SV=1	PCYT1A	40.541	20.4	7	8	7	0.972	1.051	0.729	0.961	1.007	1.213	1.347	0.795	1.087	1.045	1.163	0.2277
A0A452F8B2	LDL receptor related protein 2(predicted) OS=Capra hircus OX=9925 GN=LRP2 PE=4 SV=1	LRP2	511.61	6.3	26	32	26	1.117	0.958	1.078	1.211	1.163	1	0.899	0.844	1.003	0.938	0.847	0.0130246
A0A452F8F4	Aminoacyl tRNA synthase complex-interacting multifunctional protein 1 (Fragment)(predicted) OS=Capra hircus OX=9925 GN=AIMP1 PE=4 SV=1	AIMP1	38.851	15.3	5	6	5	1.66	0.669	0.776	2.02	0.72	1.031	0.766	0.741	0.819	0.851	0.72	0.40056
A0A452F8G0	CREG1 (Fragment)(predicted) OS=Capra hircus OX=9925 GN=CREG1 PE=4 SV=1	CREG1	23.831	44.5	7	13	7	0.944	0.972	0.857	0.947	1.193	1.661	1.032	0.963	0.89	0.845	1.097	0.62744
A0A452F8H0	Beta-1,4-galactosyltransferase 3(predicted) OS=Capra hircus OX=9925 GN=B4GALT3 PE=4 SV=1	B4GALT3	44.348	5.3	2	3	2	0.89	0.989	0.882	0.795	1.039	1.024	1.145	1.144	1.267	1.249	1.269	0.0041989
A0A452F8I0	C-X-C motif chemokine 16(predicted) OS=Capra hircus OX=9925 GN=CXCL16 PE=4 SV=1	CXCL16	27.593	3.2	1	1	1	0.936	1.395	0.851	1.122	0.958	1.041	0.918	0.992	1.068	1.152	0.983	0.96116
A0A452F8I7	Ras-related protein Ral-B (Fragment)(predicted) OS=Capra hircus OX=9925 GN=RALB PE=4 SV=1	RALB	23.408	15.5	4	5	3	0.884	0.85	0.974	0.966	0.866	1.027	1.353	0.964	1.178	1.334	1.29	0.0100576
A0A452F8J5	Dynein light chain(predicted) OS=Capra hircus OX=9925 GN=DYNLL1 PE=4 SV=1	DYNLL1	10.366	56.2	6	11	3	1.369	1.17	0.913	1.27	1.561	0.911	0.669	0.632	0.922	0.744	0.617	0.0037235
A0A452F8J6	nephronectin isoform X1(predicted) OS=Capra hircus OX=9925 GN=NPNT PE=4 SV=1	NPNT	63.606	33.6	18	25	0
A0A452F8J8	nephronectin isoform X1(predicted) OS=Capra hircus OX=9925 GN=NPNT PE=4 SV=1	NPNT	58.63	35.1	17	25	1	0.976	1.115	1.23	1.056	1.047	0.718	0.861	1.157	1.09	1.209	0.928	0.42048
A0A452F8L6	Putative ATP-dependent RNA helicase DHX37(predicted) OS=Capra hircus OX=9925 GN=DHX37 PE=4 SV=1	DHX37	128.9	0.8	1	1	1
A0A452F8T3	serine protease 58-like(predicted) OS=Capra hircus OX=9925 PE=4 SV=1	---	28.879	2.7	1	2	1	1.233	0.879	0.743	1.038	1.059	1.334	0.79	1.7	0.869	0.911	1.132	0.59326
A0A452F8V5	ADP-ribosylation factor 3 (Fragment)(predicted) OS=Capra hircus OX=9925 GN=ARF3 PE=4 SV=1	ARF3	20.601	27.1	4	5	4	0.963	1.02	1.097	1.172	0.995	1.454	0.988	0.919	1.072	0.718	0.982	0.74086
A0A452F910	Costars family protein ABRACL(predicted) OS=Capra hircus OX=9925 GN=ABRACL PE=4 SV=1	ABRACL	9.0464	9.9	1	1	1
A0A452F941	PREP protein(predicted) OS=Capra hircus OX=9925 GN=PREP PE=4 SV=1	PREP	80.781	51.1	28	42	28	0.879	0.871	0.759	0.875	0.811	1.552	1.284	1.008	1.058	1.09	1.428	0.0034381
A0A452F945	RPL23A(predicted) OS=Capra hircus OX=9925 PE=4 SV=1	---	17.683	10.9	2	2	2	1.669	0.789	0.667	2.1	0.827	0.965	0.841	0.823	0.946	0.787	0.721	0.38642
A0A452F948	Serine/threonine-protein phosphatase CPPED1(predicted) OS=Capra hircus OX=9925 GN=CPPED1 PE=4 SV=1	CPPED1	35.773	45.7	11	16	11	1.054	1.092	0.91	1.045	1.078	1.175	1.144	0.856	0.966	0.967	0.986	0.78926
A0A452F958	Enolase-like protein ENO4 (Fragment)(predicted) OS=Capra hircus OX=9925 GN=ENO4 PE=4 SV=1	ENO4	65.946	3.5	2	2	2
A0A452F982	Epididymal secretory protein E1 (Fragment)(predicted) OS=Capra hircus OX=9925 GN=NPC2 PE=4 SV=1	NPC2	16.442	63.1	16	120	16	1.097	0.883	0.783	1.117	1.115	1.235	1.446	0.776	0.927	0.697	1.017	0.94692
A0A452F989	Prefoldin subunit 3(predicted) OS=Capra hircus OX=9925 GN=VBP1 PE=4 SV=1	VBP1	22.486	51.8	10	13	10	1.012	0.96	0.602	1.077	0.941	1.749	1.047	0.807	1.015	1.056	1.236	0.26388
A0A452F992	Biliverdin reductase A(predicted) OS=Capra hircus OX=9925 GN=BLVRA PE=4 SV=1	BLVRA	33.424	12.5	3	3	3	0.954	0.984	0.958	0.9	0.994	1.586	0.988	1.005	1.251	0.833	1.182	0.27398
A0A452F9A0	Methylthioribose-1-phosphate isomerase(predicted) OS=Capra hircus OX=9925 GN=MRI1 PE=4 SV=1	MRI1	38.452	15.4	4	4	4	0.898	0.828	0.744	0.877	0.831	1.189	1.397	0.984	1.521	1.119	1.486	0.00180053
A0A452F9D1	NXPE family member 3(predicted) OS=Capra hircus OX=9925 GN=NXPE3 PE=4 SV=1	NXPE3	63.201	1.6	2	2	2	0.905	1.282	1.251	1.044	1.137	0.672	0.809	1.328	1.034	1.039	0.869	0.26458
A0A452F9D6	Patched domain-containing protein 3 (Fragment)(predicted) OS=Capra hircus OX=9925 GN=LOC102172622 PE=4 SV=1	LOC102172622	88.644	8.7	6	9	6	1.307	1.363	1.368	1.378	1.588	0.569	0.541	0.597	0.679	0.726	0.444	7.0284e-07
A0A452F9F9	Glutathione peroxidase(predicted) OS=Capra hircus OX=9925 GN=GPX6 PE=4 SV=1	GPX6	25.333	49.3	14	103	11	0.859	1.133	1.398	0.84	1.062	0.785	0.826	1.552	1.049	0.874	0.961	0.73374
A0A452F9G8	60S ribosomal protein L14(predicted) OS=Capra hircus OX=9925 GN=RPL14 PE=4 SV=1	RPL14	23.411	5.2	1	2	1	1.246	0.844	0.881	1.35	0.872	1.016	1.111	1.114	1.086	0.93	1.012	0.78094
A0A452F9H3	AP complex subunit beta(predicted) OS=Capra hircus OX=9925 GN=AP2B1 PE=4 SV=1	AP2B1	103.27	10.1	10	11	2	1.545	0.946	0.822	1.446	0.781	1.568	0.932	0.841	0.756	0.81	0.886	0.5604
A0A452F9I5	C-X-C motif chemokine(predicted) OS=Capra hircus OX=9925 PE=4 SV=1	---	10.132	60	6	27	6	1.331	0.995	1.793	1.533	1.188	0.737	0.687	0.66	0.547	0.629	0.477	0.00020317
A0A452F9J1	FUN14 domain-containing protein 2(predicted) OS=Capra hircus OX=9925 GN=FUNDC2 PE=4 SV=1	FUNDC2	10.2	58.9	4	5	1	0.934	1.031	0.91	0.64	1.471	1.329	1.219	0.598	0.948	1.271	1.076	0.73672
A0A452F9Q0	Tubulin alpha-1D chain(predicted) OS=Capra hircus OX=9925 GN=LOC102178119 PE=4 SV=1	LOC102178119	50.282	43.4	16	52	1	1.064	1.506	1.386	1.11	1.196	0.815	0.922	0.68	1.091	0.666	0.667	0.0066968
A0A452F9Q4	Bactericidal/permeability-increasing protein-like 3(predicted) OS=Capra hircus OX=9925 GN=BPIFB6 PE=4 SV=1	BPIFB6	49.748	5.9	2	2	2	1.019	0.984	1.128	0.971	0.741	1.055	1.235	1.383	0.944	1.046	1.169	0.146057
A0A452F9Q7	Mitochondria-eating protein(predicted) OS=Capra hircus OX=9925 GN=SPATA18 PE=4 SV=1	SPATA18	63.127	23.3	10	18	10	1.583	1.401	0.954	1.219	1.71	0.957	0.6	0.631	0.716	0.616	0.513	0.00114409
A0A452F9S2	MHC class I antigen(predicted) OS=Capra hircus OX=9925 GN=LOC102176782 PE=4 SV=1	LOC102176782	40.608	7.8	2	4	1	0.506	2.405	0.986	0.578	2.79	0.27	0.795	0.728	0.417	0.408	0.36	0.067956
A0A452F9S6	WFDC3 protein(predicted) OS=Capra hircus OX=9925 GN=WFDC3 PE=4 SV=1	WFDC3	14.557	31.7	3	4	3	1.382	2.092	1.08	1.302	2.117	0.619	0.518	0.243	0.35	0.559	0.287	0.00041986
A0A452F9S7	MHC class I antigen(predicted) OS=Capra hircus OX=9925 GN=LOC102181202 PE=4 SV=1	LOC102181202	41.336	11.3	4	5	0
A0A452F9T4	PI4K2A protein(predicted) OS=Capra hircus OX=9925 GN=PI4K2A PE=4 SV=1	PI4K2A	54.108	1.9	1	1	1	1.456	1.017	1.065	1.24	1.092	0.991	0.93	0.684	1.018	0.908	0.772	0.027102
A0A452F9U7	Hyaluronan-binding protein 2(predicted) OS=Capra hircus OX=9925 GN=HABP2 PE=4 SV=1	HABP2	60.767	1.5	1	1	1
A0A452F9W5	LOW QUALITY PROTEIN: dynein heavy chain 3, axonemal(predicted) OS=Capra hircus OX=9925 GN=DNAH3 PE=4 SV=1	DNAH3	467.06	2.5	10	10	6	1.528	0.928	0.833	1.706	1.171	0.951	0.887	0.859	0.762	0.701	0.675	0.040976
A0A452F9Y6	Ribosomal protein S5(predicted) OS=Capra hircus OX=9925 GN=RPS5 PE=4 SV=1	RPS5	22.876	8.8	2	2	2
A0A452F9Y8	Peptidyl-prolyl cis-trans isomerase (Fragment)(predicted) OS=Capra hircus OX=9925 GN=PPIB PE=4 SV=1	PPIB	23.715	53.2	14	37	14	1.117	0.863	1.04	1.189	0.733	0.915	0.878	1.358	1.463	0.973	1.131	0.43024
A0A452F9Z1	Prefoldin subunit 4(predicted) OS=Capra hircus OX=9925 GN=PFDN4 PE=4 SV=1	PFDN4	14.83	9.2	1	1	1
A0A452F9Z6	Dual specificity protein kinase CLK4(predicted) OS=Capra hircus OX=9925 GN=CLK4 PE=4 SV=1	CLK4	57.544	3.7	1	2	1	1.084	1.021	0.637	1.025	0.74	0.751	1.078	1.462	1.301	1.355	1.32	0.126075
A0A452FA17	Hippocalcin like 1(predicted) OS=Capra hircus OX=9925 GN=HPCAL1 PE=4 SV=1	HPCAL1	22.285	4.1	1	2	1	1.284	1.649	0.984	0.995	1.607	0.577	0.484	0.89	1.465	0.508	0.602	0.040762
A0A452FA67	Kunitz-type protease inhibitor 2(predicted) OS=Capra hircus OX=9925 GN=SPINT2 PE=4 SV=1	SPINT2	28.034	7.2	2	2	2	0.93	1.306	1.315	0.96	1.284	1.104	0.763	1.024	1.073	0.726	0.809	0.108483
A0A452FA93	FSTL1 (Fragment)(predicted) OS=Capra hircus OX=9925 GN=FSTL1 PE=4 SV=1	FSTL1	34.39	6	2	2	2
A0A452FA95	Radixin(predicted) OS=Capra hircus OX=9925 GN=RDX PE=4 SV=1	RDX	68.18	18.1	14	20	5	0.907	0.972	0.809	0.831	1.103	1.409	1.138	0.896	1.219	1.077	1.242	0.052476
A0A452FAB7	SARS(predicted) OS=Capra hircus OX=9925 GN=SARS PE=4 SV=1	SARS	58.871	18.7	8	9	8	1.072	0.838	0.771	1.159	0.879	1.476	1.289	0.905	1.089	0.896	1.198	0.20046
A0A452FAC5	Aryl hydrocarbon receptor nuclear translocator like 2(predicted) OS=Capra hircus OX=9925 GN=ARNTL2 PE=4 SV=1	ARNTL2	63.256	1.8	1	1	1	0.881	1.014	2.451	0.956	1.169	0.607	0.763	1.093	0.725	0.89	0.63	0.091583
A0A452FAD4	Cubilin (Fragment)(predicted) OS=Capra hircus OX=9925 GN=CUBN PE=4 SV=1	CUBN	396.42	2.5	10	11	10	0.916	0.878	1.024	1.025	1.054	1.099	1.099	0.872	0.989	1.166	1.067	0.34978
A0A452FAF5	Disintegrin and metalloproteinase domain-containing protein 9(predicted) OS=Capra hircus OX=9925 GN=ADAM9 PE=4 SV=1	ADAM9	90.774	11	9	19	9	0.68	1.28	1.007	0.708	1.105	1.006	0.995	1.293	1.092	1.103	1.148	0.2523
A0A452FAF7	Trans-Golgi network integral membrane protein 2 (Fragment)(predicted) OS=Capra hircus OX=9925 PE=4 SV=1	---	17.778	10.1	1	2	1	0.532	1.082	1.107	0.482	1.111	1.466	1.309	1.142	1.193	1.036	1.425	0.106661
A0A452FAH1	Cytoskeleton associated protein 4(predicted) OS=Capra hircus OX=9925 GN=CKAP4 PE=4 SV=1	CKAP4	65.547	7.5	4	4	4	1.051	0.851	1.124	1.134	0.912	1.112	0.976	1.192	1.137	0.968	1.062	0.40298
A0A452FAL7	Fumarylacetoacetate hydrolase domain-containing protein 2(predicted) OS=Capra hircus OX=9925 GN=FAHD2A PE=4 SV=1	FAHD2A	35.129	39.6	9	14	9	1.172	1.191	0.91	1.081	1.093	1.004	0.95	1.022	1.046	0.943	0.912	0.124678
A0A452FAM6	Solute carrier family 9 member B1(predicted) OS=Capra hircus OX=9925 GN=SLC9B1 PE=4 SV=1	SLC9B1	55.359	4.1	2	2	2	1.464	1.302	1.305	1.52	1.55	0.691	0.74	0.562	0.665	0.624	0.46	5.7495e-07
A0A452FAM7	Carboxylic ester hydrolase(predicted) OS=Capra hircus OX=9925 GN=ACHE PE=4 SV=1	ACHE	67.593	14.5	8	13	7	1.244	0.954	0.934	1.316	0.921	0.913	0.929	1.101	0.859	1.072	0.908	0.35554
A0A452FAP7	Plexin B2(predicted) OS=Capra hircus OX=9925 PE=4 SV=1	---	68.322	7.9	4	4	4	1.017	1.207	1.003	1.008	1.542	0.888	1.065	1.049	0.803	0.87	0.809	0.07674
A0A452FAQ7	Golgin subfamily B member 1(predicted) OS=Capra hircus OX=9925 PE=4 SV=1	---	282.98	0.6	2	2	2	0.667	0.828	0.694	0.736	2.506	1.325	0.672	0.863	1.262	0.832	0.912	0.92748
A0A452FAR2	LMAN2 protein(predicted) OS=Capra hircus OX=9925 GN=LMAN2 PE=4 SV=1	LMAN2	40.464	29.8	11	19	11	0.906	1.161	1.37	0.869	1.024	0.833	0.96	1.375	1.091	0.77	0.944	0.63334
A0A452FAS9	Succinate-CoA ligase subunit beta (Fragment)(predicted) OS=Capra hircus OX=9925 GN=SUCLG2 PE=4 SV=1	SUCLG2	45.892	44.3	20	36	20	1.16	1.106	0.81	0.975	1.015	1.199	0.947	0.782	0.962	1.262	1.017	0.93194
A0A452FAU0	Cystathionine gamma-lyase(predicted) OS=Capra hircus OX=9925 GN=CTH PE=4 SV=1	CTH	45.645	12.3	4	5	4	1.005	1	0.969	1.081	1.161	1.132	1.09	0.974	0.952	1.044	0.995	0.92328
A0A452FAV6	Integral membrane protein 2C(predicted) OS=Capra hircus OX=9925 GN=ITM2C PE=4 SV=1	ITM2C	29.485	8.3	1	1	1
A0A452FAW1	N-myosin-9(predicted) OS=Capra hircus OX=9925 GN=MYH9 PE=4 SV=1	MYH9	227.22	5	9	10	8	1.241	1.173	1.222	1.399	1.281	0.606	0.829	0.825	0.826	0.891	0.63	0.00021758
A0A452FAW4	Lipopolysaccharide binding protein(predicted) OS=Capra hircus OX=9925 GN=LBP PE=4 SV=1	LBP	53.467	13.7	6	11	6	1.259	0.876	1.183	2.303	0.889	0.483	0.774	0.86	0.588	0.454	0.485	0.0129378
A0A452FAZ1	Proteasome subunit beta(predicted) OS=Capra hircus OX=9925 GN=PSMB4 PE=4 SV=1	PSMB4	28.987	33.7	7	15	7	1.118	0.988	0.879	1.14	1.006	1.224	1.063	0.893	0.994	0.994	1.007	0.9326
A0A452FB11	Proteasome subunit alpha type(predicted) OS=Capra hircus OX=9925 GN=PSMA1 PE=4 SV=1	PSMA1	29.585	68.8	17	39	17	1.13	0.992	0.775	1.107	0.963	1.323	1.096	0.81	0.937	1.081	1.056	0.6501
A0A452FB24	Beta-enolase(predicted) OS=Capra hircus OX=9925 GN=ENO3 PE=4 SV=1	ENO3	47.068	41.9	15	34	6	0.691	1.006	0.915	0.863	0.956	1.292	1.229	0.941	0.734	1.296	1.239	0.162236
A0A452FB33	Beta-galactosidase-1-like protein(predicted) OS=Capra hircus OX=9925 GN=GLB1L PE=4 SV=1	GLB1L	73.253	21.3	11	26	10	1.319	1.427	1.17	1.252	1.281	0.812	0.726	0.759	0.755	0.843	0.604	1.1282e-06
A0A452FB52	DnaJ-like protein subfamily B member 9(predicted) OS=Capra hircus OX=9925 GN=DNAJB9 PE=4 SV=1	DNAJB9	25.814	22	6	10	6	0.933	1.113	1.023	0.984	1.014	0.748	0.81	1.411	1.143	1.083	1.025	0.998
A0A452FB63	UBX domain protein 11(predicted) OS=Capra hircus OX=9925 GN=UBXN11 PE=4 SV=1	UBXN11	53.09	17.8	7	8	7	1.28	1.359	0.856	1.025	1.735	0.785	0.864	0.732	0.787	0.837	0.64	0.028341
A0A452FBA5	ethanolaminephosphotransferase 1(predicted) OS=Capra hircus OX=9925 PE=4 SV=1	---	43.679	2.9	1	1	1	0.804	0.822	0.631	1.028	0.693	1.149	2.063	1.176	1.032	1.02	1.619	0.0180951
A0A452FBH0	Basigin(predicted) OS=Capra hircus OX=9925 GN=BSG PE=4 SV=1	BSG	29.555	39	9	16	9	1.067	1.028	0.989	0.987	1.045	1.11	1.21	0.831	0.928	1.101	1.013	0.9592
A0A452FBM2	Stress-70 protein, mitochondrial(predicted) OS=Capra hircus OX=9925 GN=HSPA9 PE=4 SV=1	HSPA9	73.707	30.2	21	28	20	1.156	1.085	0.835	1.01	1.148	1.119	0.926	0.845	0.98	1.099	0.949	0.54392
A0A452FBR5	Beta-1,4-galactosyltransferase 4(predicted) OS=Capra hircus OX=9925 GN=B4GALT4 PE=4 SV=1	B4GALT4	39.942	25.3	9	10	9	0.627	0.92	1.191	0.652	0.787	0.643	1.247	1.906	1.221	1.385	1.533	0.097757
A0A452FBS1	D-2-hydroxyglutarate dehydrogenase, mitochondrial(predicted) OS=Capra hircus OX=9925 PE=4 SV=1	---	31.102	7.1	2	2	1	1.102	1.045	1.208	1.074	0.948	0.866	0.93	1.126	1.061	1.102	0.946	0.39522
A0A452FBU4	ADP-ribose glycohydrolase MACROD1(predicted) OS=Capra hircus OX=9925 GN=MACROD1 PE=4 SV=1	MACROD1	34.647	13.3	4	5	4	0.827	0.927	0.913	0.956	0.927	1.162	1.103	1.04	1.105	1.214	1.236	0.00037612
A0A452FBV9	Serine protease inhibitor Kazal-type 6(predicted) OS=Capra hircus OX=9925 GN=SPINK6 PE=4 SV=1	SPINK6	8.7651	20	1	1	1	0.674	0.719	0.486	0.684	0.7	0.971	1.523	0.528	1.143	2.778	2.128	0.093223
A0A452FBW0	TBCD protein(predicted) OS=Capra hircus OX=9925 GN=TBCD PE=4 SV=1	TBCD	126.81	9	9	9	9	0.872	0.953	0.874	0.887	1.004	1.452	1.448	1.284	0.973	1.052	1.353	0.0101828
A0A452FC08	Phosphatidylinositol transfer protein alpha OS=Capra hircus OX=9925 GN=PITPNA PE=4 SV=1	PITPNA	32.223	54	19	27	16	1.062	1.201	0.852	1.013	1.248	1.032	0.958	0.826	0.985	1.033	0.899	0.24028
A0A452FC14	Caltrin(predicted) OS=Capra hircus OX=9925 GN=LOC102179414 PE=4 SV=1	LOC102179414	8.9454	49.4	6	130	6	0.493	0.632	0.928	0.382	0.463	0.69	1.021	1.836	1.686	1.763	2.414	0.007865
A0A452FC19	DNA polymerase iota(predicted) OS=Capra hircus OX=9925 GN=POLI PE=4 SV=1	POLI	71.289	3.9	2	2	2	0.848	0.908	1.214	0.77	0.762	1.135	0.962	1.219	1.442	1.202	1.324	0.027699
A0A452FC41	Desmoglein-1(predicted) OS=Capra hircus OX=9925 GN=DSG1 PE=4 SV=1	DSG1	109.04	1.4	1	1	1	0.792	1.075	1.175	0.762	1.161	0.813	0.957	1.66	1.418	0.733	1.124	0.66372
A0A452FC56	Kynurenine--oxoglutarate transaminase 3(predicted) OS=Capra hircus OX=9925 GN=KYAT3 PE=4 SV=1	KYAT3	53.698	3.8	2	2	2	1.119	1.14	0.998	1.179	1.165	1.118	1.068	0.739	0.912	0.97	0.858	0.073881
A0A452FC89	Hyaluronidase(predicted) OS=Capra hircus OX=9925 GN=LOC100860748 PE=4 SV=1	LOC100860748	61.885	38.3	25	106	25	1.565	1.466	1.133	1.358	1.482	0.671	0.576	0.581	0.672	0.659	0.451	1.1113e-06
A0A452FCA4	Leucine-rich repeat and coiled-coil domain-containing protein 1 (Fragment)(predicted) OS=Capra hircus OX=9925 GN=LRRCC1 PE=4 SV=1	LRRCC1	118.73	0.9	1	1	1	1.588	0.743	1.602	1.993	0.946	0.657	0.742	0.855	0.711	0.643	0.525	0.037575
A0A452FCB1	BIN2 protein(predicted) OS=Capra hircus OX=9925 GN=LOC102177604 PE=4 SV=1	LOC102177604	57.923	14.8	6	6	1
A0A452FCF6	phosphoethanolamine/phosphocholine phosphatase(predicted) OS=Capra hircus OX=9925 GN=PHOSPHO1 PE=4 SV=1	PHOSPHO1	29.72	3	1	1	1	1.101	1.031	0.929	0.911	1.027	1.24	1.135	0.947	0.927	1.173	1.085	0.29432
A0A452FCJ1	Leukocyte cell-derived chemotaxin-2(predicted) OS=Capra hircus OX=9925 GN=LECT2 PE=4 SV=1	LECT2	16.433	5.3	1	1	1	0.964	1.203	1.083	1.018	1.14	0.673	1.046	1.355	1.06	0.949	0.94	0.5056
A0A452FCK0	PRSS58(predicted) OS=Capra hircus OX=9925 GN=LOC102178440 PE=4 SV=1	LOC102178440	27.606	8.6	2	2	2	1.183	1.197	0.709	0.895	1.629	1.308	0.834	0.728	0.881	1.027	0.851	0.43544
A0A452FCK1	GPR56 protein(predicted) OS=Capra hircus OX=9925 GN=ADGRG1 PE=4 SV=1	ADGRG1	76.997	2.5	1	1	1	0.77	1.036	1.233	1.077	1.22	0.801	1.155	1.417	0.942	0.864	0.971	0.78262
A0A452FCL2	V-type proton ATPase subunit D(predicted) OS=Capra hircus OX=9925 GN=ATP6V1D PE=4 SV=1	ATP6V1D	27.344	37.6	12	17	12	0.924	0.977	0.938	0.84	0.863	1.123	1.278	1.038	1.169	1.159	1.27	0.00059745
A0A452FCM6	Beta-hexosaminidase(predicted) OS=Capra hircus OX=9925 GN=HEXA PE=4 SV=1	HEXA	60.3	28.7	14	22	14	1.196	1.253	1.092	1.101	1.281	0.788	0.818	0.944	0.904	0.863	0.729	0.000135521
A0A452FCQ3	Vacuolar protein sorting-associated protein 28 homolog(predicted) OS=Capra hircus OX=9925 GN=VPS28 PE=4 SV=1	VPS28	25.484	18.1	4	4	4	0.96	0.964	0.939	0.972	1.241	0.856	0.865	1.539	1.117	0.992	1.058	0.7637
A0A452FCR9	EGF like repeats and discoidin domains 3(predicted) OS=Capra hircus OX=9925 GN=EDIL3 PE=4 SV=1	EDIL3	52.654	64.5	30	203	30	0.813	1.111	1.245	0.789	0.936	0.576	1.051	1.665	1.194	1.113	1.144	0.63436
A0A452FCS4	COP9 signalosome complex subunit 5 (Fragment)(predicted) OS=Capra hircus OX=9925 GN=COPS5 PE=4 SV=1	COPS5	37.564	14.7	4	5	4	1.219	1.091	0.84	1.227	1.009	1.46	1.206	0.726	0.887	0.828	0.948	0.61078
A0A452FCS5	Transport and Golgi organization protein 1 homolog(predicted) OS=Capra hircus OX=9925 GN=MIA3 PE=4 SV=1	MIA3	211.43	4.4	8	9	8	0.978	1.184	1.178	1.091	1.066	0.877	0.988	1.269	0.913	0.894	0.899	0.175585
A0A452FCU2	Farnesyl pyrophosphate synthase(predicted) OS=Capra hircus OX=9925 GN=FDPS PE=4 SV=1	FDPS	40.389	5.4	2	4	2	1.023	1.056	0.853	1.081	0.942	1.23	1.021	0.821	1.149	1.09	1.072	0.45686
A0A452FCU3	Retinol dehydrogenase 11(predicted) OS=Capra hircus OX=9925 GN=RDH11 PE=4 SV=1	RDH11	36.654	3	1	2	1	1.14	0.869	0.973	1.097	0.933	0.882	1.136	0.974	1.001	1.397	1.075	0.50882
A0A452FCU5	Phosphodiesterase(predicted) OS=Capra hircus OX=9925 GN=PDE4A PE=4 SV=1	PDE4A	91.475	1.6	1	1	1
A0A452FCW0	Calmin(predicted) OS=Capra hircus OX=9925 GN=CLMN PE=4 SV=1	CLMN	112.59	21.7	19	35	19	0.862	0.789	0.832	0.903	0.736	1.226	1.387	1.164	1.167	1.252	1.503	2.3495e-05
A0A452FCW6	Basal cell adhesion molecule(predicted) OS=Capra hircus OX=9925 GN=BCAM PE=4 SV=1	BCAM	68.192	8.3	5	6	5	1.049	1.203	0.959	1.099	1.12	1.019	0.878	1.191	1.075	0.758	0.906	0.2536
A0A452FCX9	Delta-aminolevulinic acid dehydratase(predicted) OS=Capra hircus OX=9925 GN=ALAD PE=4 SV=1	ALAD	35.397	3.4	1	1	1	0.87	1.056	1.121	0.902	1.09	0.888	0.961	1.537	1.01	1.086	1.088	0.53454
A0A452FCY2	Alpha-L-fucosidase(predicted) OS=Capra hircus OX=9925 GN=FUCA2 PE=4 SV=1	FUCA2	53.525	36.7	15	22	15	0.751	0.685	0.819	0.843	0.777	1.729	1.831	1.083	0.981	0.847	1.67	0.042723
A0A452FD14	Glycerol-3-phosphate dehydrogenase [NAD(+)](predicted) OS=Capra hircus OX=9925 GN=GPD1 PE=4 SV=1	GPD1	38.681	13.4	5	6	3	0.758	1.639	1.147	0.921	1.481	0.713	0.756	1.11	1.108	0.843	0.762	0.184021
A0A452FD15	Meteorin-like protein (Fragment)(predicted) OS=Capra hircus OX=9925 GN=METRNL PE=4 SV=1	METRNL	33.762	26.5	7	13	7	0.938	1.013	1.135	0.923	0.992	0.868	0.913	1.404	1.156	1.088	1.086	0.47824
A0A452FD51	26S proteasome non-ATPase regulatory subunit 9(predicted) OS=Capra hircus OX=9925 GN=PSMD9 PE=4 SV=1	PSMD9	24.257	9.5	2	2	2	0.799	0.774	0.799	0.852	0.855	1.364	1.354	1.288	1.148	1.218	1.562	1.3271e-06
A0A452FD52	Protein disulfide-isomerase A4(predicted) OS=Capra hircus OX=9925 GN=PDIA4 PE=4 SV=1	PDIA4	72.556	24.2	14	21	14	1.058	0.929	1.066	1.112	0.896	1.029	0.988	1.202	1.138	1.09	1.076	0.21034
A0A452FD55	Heat shock protein 75 kDa, mitochondrial(predicted) OS=Capra hircus OX=9925 GN=TRAP1 PE=4 SV=1	TRAP1	77.802	1.4	1	1	1	0.969	0.981	1.075	1.195	1.159	1.137	1.328	0.768	0.595	1.194	0.934	0.52974
A0A452FD64	Interleukin 4 receptor(predicted) OS=Capra hircus OX=9925 GN=IL4R PE=4 SV=1	IL4R	86.845	4.3	3	3	3	1.093	1.161	1.244	0.902	1.09	0.677	0.513	1.279	1.409	1.281	0.94	0.564
A0A452FD71	Fetuin-B(predicted) OS=Capra hircus OX=9925 GN=FETUB PE=4 SV=1	FETUB	42.499	24	9	13	9	1.034	1.516	1.638	1.04	1.582	0.559	0.957	0.683	0.677	0.689	0.523	0.00143871
A0A452FD87	Signal induced proliferation associated 1 like 1(predicted) OS=Capra hircus OX=9925 GN=SIPA1L1 PE=4 SV=1	SIPA1L1	197.18	0.7	1	1	1	1.184	1.271	0.746	0.862	0.905	1.37	1.09	0.839	0.985	1.155	1.095	0.4723
A0A452FDB4	Kazal-type serine protease inhibitor domain-containing protein 1 (Fragment)(predicted) OS=Capra hircus OX=9925 GN=KAZALD1 PE=4 SV=1	KAZALD1	32.99	12.5	4	4	4	1.172	0.95	0.798	1.086	1.044	1.043	1.398	0.929	1.03	0.974	1.064	0.55566
A0A452FDC1	NADH dehydrogenase [ubiquinone] iron-sulfur protein 6, mitochondrial(predicted) OS=Capra hircus OX=9925 GN=NDUFS6 PE=4 SV=1	NDUFS6	13.423	24.2	2	2	2	1.05	0.8	1.245	1.291	1.143	0.648	0.838	1.147	1.043	1.241	0.889	0.39798
A0A452FDD3	UDP-glucuronic acid decarboxylase 1 isoform X2(predicted) OS=Capra hircus OX=9925 PE=4 SV=1	---	39.432	2	1	2	1	0.956	0.917	1.442	1.111	1.171	0.728	1.119	1.213	1.003	0.831	0.874	0.29702
A0A452FDE4	glucoside xylosyltransferase 1 isoform X3(predicted) OS=Capra hircus OX=9925 GN=GXYLT1 PE=4 SV=1	GXYLT1	50.456	4.6	2	2	2	1.232	1.178	0.911	1.17	1.096	1.027	0.903	1.001	0.972	0.954	0.869	0.046001
A0A452FDJ0	ADP-ribose pyrophosphatase(predicted) OS=Capra hircus OX=9925 GN=NUDT9 PE=4 SV=1	NUDT9	38.589	16	4	8	4	0.86	1.139	1.06	0.928	1.084	0.838	0.985	1.214	1.232	1.011	1.041	0.69878
A0A452FDL5	PNMT(predicted) OS=Capra hircus OX=9925 GN=PNMT PE=4 SV=1	PNMT	31.299	3.1	1	1	1
A0A452FDQ9	BCL2-associated athanogene 4 (Fragment)(predicted) OS=Capra hircus OX=9925 GN=BAG4 PE=4 SV=1	BAG4	49.426	4.8	2	4	2	0.89	0.66	0.677	0.95	0.597	1.777	1.577	1.04	0.989	1.259	1.76	0.0051192
A0A452FDR2	40S ribosomal protein S8(predicted) OS=Capra hircus OX=9925 GN=RPS8 PE=4 SV=1	RPS8	24.145	10.6	2	2	2	1.636	0.822	0.825	2.083	0.799	1.093	0.742	0.813	0.901	0.72	0.692	0.21546
A0A452FDV7	Importin subunit alpha(predicted) OS=Capra hircus OX=9925 GN=KPNA3 PE=4 SV=1	KPNA3	54.923	1.8	1	1	1
A0A452FDV8	Renalase (Fragment)(predicted) OS=Capra hircus OX=9925 PE=4 SV=1	---	19.315	11.5	2	2	2	0.845	0.945	0.714	0.878	0.911	1.242	1.247	1.051	1.216	1.352	1.423	0.00053634
A0A452FDW1	Oxidation resistance protein 1(predicted) OS=Capra hircus OX=9925 GN=OXR1 PE=4 SV=1	OXR1	93.36	13.5	8	8	8	0.904	1.213	0.933	0.954	1	1.041	1.013	1.098	1.324	1.251	1.144	0.104664
A0A452FDW5	Alkaline phosphatase(predicted) OS=Capra hircus OX=9925 GN=LOC102190919 PE=4 SV=1	LOC102190919	56.802	27.4	10	17	3	0.833	0.806	0.954	0.748	0.913	1.669	0.977	1.087	0.971	1.287	1.408	0.0191186
A0A452FDX2	26S protease regulatory subunit 8 isoform X1(predicted) OS=Capra hircus OX=9925 GN=PSMC5 PE=4 SV=1	PSMC5	45.656	47.5	17	22	17	0.959	0.811	0.838	0.945	0.782	1.133	1.324	1.069	1.165	1.235	1.367	0.00046043
A0A452FE11	Serine/threonine-protein phosphatase 6 regulatory subunit 3(predicted) OS=Capra hircus OX=9925 GN=PPP6R3 PE=4 SV=1	PPP6R3	95.214	5.1	3	4	3	1.087	0.96	0.865	0.796	0.87	1.21	1.207	1.215	1.183	1.052	1.282	0.0029578
A0A452FE38	V-type proton ATPase catalytic subunit A(predicted) OS=Capra hircus OX=9925 GN=ATP6V1A PE=4 SV=1	ATP6V1A	68.475	50.6	29	76	29	0.836	0.907	0.848	0.819	0.89	1.301	1.432	0.945	1.087	1.146	1.375	0.0143357
A0A452FE42	Serpin B6(predicted) OS=Capra hircus OX=9925 GN=LOC106503969 PE=4 SV=1	LOC106503969	42.549	27.8	12	27	2	1.548	1.346	0.831	1.419	1.264	1.269	0.585	0.838	0.886	0.479	0.633	0.040064
A0A452FE46	WD repeat-containing protein 26 isoform X2(predicted) OS=Capra hircus OX=9925 GN=WDR26 PE=4 SV=1	WDR26	70.052	4.2	3	3	3	0.801	0.862	0.709	0.857	0.841	1.592	1.282	1.119	1.139	1.227	1.562	0.00030423
A0A452FE79	Integrin alpha FG-GAP repeat containing 1(predicted) OS=Capra hircus OX=9925 GN=ITFG1 PE=4 SV=1	ITFG1	67.657	5.4	3	3	3	0.98	0.954	0.807	1.128	0.999	1.246	0.901	1.095	1.38	0.951	1.145	0.22048
A0A452FEB2	Insulin-like peptide INSL6(predicted) OS=Capra hircus OX=9925 GN=INSL6 PE=4 SV=1	INSL6	23.899	14.6	3	9	3	1.759	1.565	0.812	1.396	1.5	0.764	0.676	0.542	0.646	0.68	0.47	0.00105797
A0A452FEG1	Aminopeptidase-like 1(predicted) OS=Capra hircus OX=9925 GN=NPEPL1 PE=4 SV=1	NPEPL1	55.793	15.1	6	7	6	1.098	1.048	1.001	1.178	1.016	1.103	1.105	0.901	0.977	1.065	0.964	0.46906
A0A452FEG8	Succinate--CoA ligase [ADP/GDP-forming] subunit alpha, mitochondrial(predicted) OS=Capra hircus OX=9925 GN=SUCLG1 PE=4 SV=1	SUCLG1	36.102	26	8	15	8	1.262	1.11	0.768	1.052	1.043	1.246	0.924	0.692	0.993	1.265	0.978	0.81646
A0A452FEH4	Eukaryotic translation initiation factor 3 subunit F(predicted) OS=Capra hircus OX=9925 GN=EIF3F PE=4 SV=1	EIF3F	38.578	3	1	1	1	1.247	1.061	0.958	1.366	0.862	0.975	1.059	1.032	0.918	0.972	0.902	0.362
A0A452FEH6	Serine incorporator 3(predicted) OS=Capra hircus OX=9925 GN=SERINC3 PE=4 SV=1	SERINC3	52.232	1.5	1	1	1	1.105	0.937	1.124	1.047	1.002	0.982	1.345	0.976	0.94	0.976	1.001	0.93358
A0A452FEJ8	T-complex protein 1 subunit delta(predicted) OS=Capra hircus OX=9925 PE=4 SV=1	---	56.802	45.9	22	50	2	0.829	0.733	0.647	0.748	0.734	1.9	1.305	0.881	1.243	1.252	1.783	0.0026021
A0A452FEK3	Receptor protein-tyrosine kinase(predicted) OS=Capra hircus OX=9925 GN=EGFR PE=4 SV=1	EGFR	133.7	13.4	16	46	16	1.002	0.906	1.163	1.007	0.927	1.093	1.372	1.01	0.883	0.984	1.067	0.51902
A0A452FEL2	Dynactin subunit 6(predicted) OS=Capra hircus OX=9925 GN=DCTN6 PE=4 SV=1	DCTN6	20.333	4.8	1	2	1	1.117	1.096	0.823	1.068	1.103	0.91	1.258	0.783	1.071	1.147	0.993	0.88716
A0A452FEP2	KIAA0319 like(predicted) OS=Capra hircus OX=9925 GN=KIAA0319L PE=4 SV=1	KIAA0319L	114.01	3.2	3	3	3	1.179	0.834	2.132	1.013	0.803	0.621	1.032	1.278	0.842	0.819	0.77	0.33218
A0A452FER1	Vacuolar protein sorting-associated protein 13A(predicted) OS=Capra hircus OX=9925 GN=VPS13A PE=4 SV=1	VPS13A	359.17	2.1	7	7	7	1.117	0.98	1.047	1.075	0.966	1.055	0.918	1.238	0.981	0.833	0.969	0.60518
A0A452FER7	Anamorsin(predicted) OS=Capra hircus OX=9925 GN=CIAPIN1 PE=4 SV=1	CIAPIN1	33.263	8	2	4	2	1.152	0.958	0.724	1.076	0.963	1.517	1.302	0.778	0.932	0.996	1.134	0.4701
A0A452FER9	Keratin, type II cytoskeletal 7(predicted) OS=Capra hircus OX=9925 GN=KRT7 PE=4 SV=1	KRT7	51.634	17	8	7	6	0.551	1.675	1.462	0.677	1.488	0.528	0.887	1.1	1.086	0.821	0.756	0.4379
A0A452FEU0	39S ribosomal protein L22, mitochondrial(predicted) OS=Capra hircus OX=9925 GN=MRPL22 PE=4 SV=1	MRPL22	24.21	3.3	1	1	1
A0A452FEU9	Myosin VIIA and Rab interacting protein(predicted) OS=Capra hircus OX=9925 GN=MYRIP PE=4 SV=1	MYRIP	95.014	1.6	1	1	1	0.46	0.707	1.346	0.758	0.984	1.703	2.095	1	0.839	0.577	1.46	0.29164
A0A452FEW3	C1q and TNF related 12(predicted) OS=Capra hircus OX=9925 GN=C1QTNF12 PE=4 SV=1	C1QTNF12	31.385	3.4	1	1	1
A0A452FEW5	Beta-hexosaminidase(predicted) OS=Capra hircus OX=9925 GN=HEXB PE=4 SV=1	HEXB	61.593	44.6	24	151	16	0.916	0.985	0.985	0.944	1.15	1.279	1.097	0.901	0.972	0.853	1.024	0.84598
A0A452FEX1	Phosphatidic acid phosphatase type 2A(predicted) OS=Capra hircus OX=9925 GN=PLPP1 PE=4 SV=1	PLPP1	32.297	12.3	2	3	2	1.103	1.069	1.514	1.089	1.238	0.69	0.948	0.807	0.87	0.914	0.703	0.0036246
A0A452FEZ1	Solute carrier family 52, riboflavin transporter, member 3(predicted) OS=Capra hircus OX=9925 GN=SLC52A3 PE=4 SV=1	SLC52A3	56.614	3.6	1	1	1	0.989	0.938	1.122	1.162	0.887	0.801	1.038	1.508	1.047	1.026	1.063	0.69908
A0A452FF06	FGF9 OS=Capra hircus OX=9925 GN=FGF9 PE=2 SV=1	FGF9	23.382	9.1	2	2	2	0.876	1.207	1.139	0.911	1.089	0.585	0.989	1.782	0.769	1.21	1.022	0.83238
A0A452FF28	COL18A1 protein(predicted) OS=Capra hircus OX=9925 PE=4 SV=1	---	33.604	19.5	6	6	6	0.859	0.91	1.003	1.05	0.979	1.225	1.292	1.008	1.032	1.089	1.176	0.028977
A0A452FF94	Thioltransferase(predicted) OS=Capra hircus OX=9925 GN=GLRX PE=4 SV=1	GLRX	11.784	18.9	1	1	1
A0A452FF98	Hormone-sensitive lipase (Fragment)(predicted) OS=Capra hircus OX=9925 GN=LIPE PE=4 SV=1	LIPE	82.635	31.2	20	26	20	0.741	0.746	0.706	0.764	0.701	1.151	1.448	1.117	1.26	1.556	1.786	0.00099932
A0A452FFB0	LOW QUALITY PROTEIN: fibrous sheath-interacting protein 2-like(predicted) OS=Capra hircus OX=9925 PE=4 SV=1	---	717.45	0.3	2	3	2	1.253	0.999	1.184	0.95	0.999	1.005	0.662	0.765	0.949	1.623	0.929	0.4915
A0A452FFD7	Complement factor H(predicted) OS=Capra hircus OX=9925 GN=CFH PE=4 SV=1	CFH	139.9	12.6	12	15	10	0.767	1.032	2.802	0.757	1.074	0.506	0.753	1.257	0.881	0.656	0.63	0.2226
A0A452FFF4	OTU domain, ubiquitin aldehyde binding 2(predicted) OS=Capra hircus OX=9925 GN=OTUB2 PE=4 SV=1	OTUB2	27.215	6.4	2	2	2	1.153	0.749	0.574	1.6	0.793	1.802	1.038	0.984	0.875	0.877	1.145	0.49064
A0A452FFH6	Pancreatic adenocarcinoma upregulated factor-like(predicted) OS=Capra hircus OX=9925 GN=LOC102189536 PE=4 SV=1	LOC102189536	18.25	50	7	23	7	0.891	1.828	1.34	0.833	1.165	0.432	0.732	1.084	0.869	0.812	0.649	0.071759
A0A452FFI1	EH domain-containing protein 1(predicted) OS=Capra hircus OX=9925 GN=EHD1 PE=4 SV=1	EHD1	60.681	38	15	21	9	1.273	0.897	0.982	1.345	1.019	0.878	0.807	1.524	0.995	0.798	0.907	0.43766
A0A452FFI7	E3 ubiquitin-protein ligase HUWE1(predicted) OS=Capra hircus OX=9925 GN=HUWE1 PE=4 SV=1	HUWE1	479.1	2.5	10	12	10	0.919	0.81	0.673	0.87	0.83	1.354	1.283	0.959	1.285	1.418	1.536	0.00116333
A0A452FFK1	acetyl-CoA carboxylase 2(predicted) OS=Capra hircus OX=9925 GN=ACACB PE=4 SV=1	ACACB	274.17	7.9	16	16	16	0.859	0.829	0.861	0.871	0.795	1.179	1.348	1.124	1.091	1.124	1.392	4.2178e-05
A0A452FFK6	Retinoic acid receptor responder (Tazarotene induced) 1(predicted) OS=Capra hircus OX=9925 GN=RARRES1 PE=4 SV=1	RARRES1	32.864	16.3	4	8	4	0.714	0.723	0.508	0.759	0.802	2.547	1.742	1.035	0.939	0.56	1.946	0.117996
A0A452FFM4	Putative casein kinase ii subunit alpha'-like protein(predicted) OS=Capra hircus OX=9925 GN=CSNK2A2 PE=4 SV=1	CSNK2A2	41.181	4.6	2	2	2	1.68	1.033	1.354	1.829	1.082	0.593	0.662	0.807	0.723	0.696	0.499	0.00064172
A0A452FFP6	Beta-mannosidase OS=Capra hircus OX=9925 GN=MANBA PE=4 SV=1	MANBA	101.4	45.8	38	137	38	0.676	1.074	1.15	0.646	1.038	1.366	1.15	1.297	1.141	0.819	1.259	0.14582
A0A452FFQ6	Acyl-CoA dehydrogenase family member 9, mitochondrial (Fragment)(predicted) OS=Capra hircus OX=9925 GN=ACAD9 PE=4 SV=1	ACAD9	68.158	21.9	15	17	15	1.624	0.814	0.911	1.237	0.716	1.057	1.008	0.671	0.864	1.256	0.916	0.73598
A0A452FFV4	Acetyltransferase component of pyruvate dehydrogenase complex(predicted) OS=Capra hircus OX=9925 GN=DLAT PE=4 SV=1	DLAT	67.359	8.6	5	10	5	1.602	0.82	1.926	1.652	0.944	0.561	0.542	0.694	0.61	0.597	0.433	0.0106159
A0A452FG03	Annexin(predicted) OS=Capra hircus OX=9925 GN=ANXA1 PE=4 SV=1	ANXA1	38.897	34.7	10	17	10	1.089	0.892	1.269	1.642	1.036	1.102	0.669	0.778	0.751	1.013	0.728	0.055516
A0A452FG20	NID1 protein(predicted) OS=Capra hircus OX=9925 GN=NID1 PE=4 SV=1	NID1	137.19	2.1	2	2	2
A0A452FG33	sortilin-related receptor(predicted) OS=Capra hircus OX=9925 GN=SORL1 PE=4 SV=1	SORL1	241.66	1.4	3	3	3	1.317	1.224	0.794	1.368	1.159	0.958	0.897	0.876	0.815	0.816	0.744	0.051756
A0A452FG56	Stromelysin-3 (Fragment)(predicted) OS=Capra hircus OX=9925 GN=MMP11 PE=4 SV=1	MMP11	54.785	2.2	1	1	1
A0A452FG68	Bodhesin-4(predicted) OS=Capra hircus OX=9925 PE=4 SV=1	---	14.87	54.1	12	363	1	0.889	0.918	1.26	0.984	0.895	0.739	1.405	1.339	1.31	0.751	1.121	0.62046
A0A452FG88	IQ motif containing GTPase activating protein 2(predicted) OS=Capra hircus OX=9925 GN=IQGAP2 PE=4 SV=1	IQGAP2	177.85	10	15	16	15	0.861	0.818	0.956	0.992	0.975	0.904	1.4	0.928	1.21	1.176	1.221	0.073424
A0A452FG95	Desmocollin-2(predicted) OS=Capra hircus OX=9925 GN=DSC2 PE=4 SV=1	DSC2	94.851	2.9	3	3	3	0.868	1.307	0.741	0.856	1.334	1.011	1.682	1.053	0.856	0.729	1.044	0.87354
A0A452FGA7	Very-long-chain (3R)-3-hydroxyacyl-CoA dehydratase(predicted) OS=Capra hircus OX=9925 GN=HACD3 PE=4 SV=1	HACD3	43.243	5.8	1	2	1	1.422	1.155	0.943	0.884	1.071	0.583	0.817	1.297	1.118	1.175	0.911	0.50258
A0A452FGE4	Plasminogen activator inhibitor type 1(predicted) OS=Capra hircus OX=9925 GN=SERPINE1 PE=4 SV=1	SERPINE1	45.383	24.4	6	7	6	0.999	1.138	1.443	1.241	1.087	0.796	0.776	1.387	0.807	0.825	0.777	0.065059
A0A452FGE8	Transmembrane protein 210(predicted) OS=Capra hircus OX=9925 GN=TMEM210 PE=4 SV=1	TMEM210	15.018	7.7	1	3	1	1.055	0.818	1.762	1.105	0.911	0.913	0.856	1.039	1.099	0.932	0.856	0.40632
A0A452FGF2	Thioredoxin reductase 1, cytoplasmic(predicted) OS=Capra hircus OX=9925 GN=TXNRD1 PE=4 SV=1	TXNRD1	54.548	67.6	27	56	26	1.168	0.955	0.872	1.175	0.936	1.311	1.074	0.914	0.945	1.055	1.038	0.69006
A0A452FGG5	Dipeptidylpeptidase 4(predicted) OS=Capra hircus OX=9925 GN=DPP4 PE=4 SV=1	DPP4	88.357	40.8	32	72	32	0.975	1.151	1.086	0.977	1.316	1.036	0.786	0.967	1.153	0.893	0.878	0.16338
A0A452FGH0	Tubulointerstitial nephritis antigen like 1(predicted) OS=Capra hircus OX=9925 GN=TINAGL1 PE=4 SV=1	TINAGL1	52.791	16.2	6	10	6	1.036	1.041	1.517	0.945	0.933	0.731	0.997	0.848	1.502	0.822	0.895	0.43128
A0A452FGI6	Nucleoside diphosphate kinase(predicted) OS=Capra hircus OX=9925 GN=NME3 PE=4 SV=1	NME3	19.061	18.9	4	4	4	0.908	0.912	1.392	0.987	0.81	0.914	0.95	1.326	1.161	1.103	1.089	0.43574
A0A452FGQ5	Prefoldin subunit 5(predicted) OS=Capra hircus OX=9925 GN=PFDN5 PE=4 SV=1	PFDN5	17.385	53.2	8	9	8	0.902	0.932	0.732	0.914	0.969	1.524	1.075	0.983	1.014	1.131	1.287	0.02988
A0A452FGR2	Sphingomyelin phosphodiesterase(predicted) OS=Capra hircus OX=9925 GN=SMPD1 PE=4 SV=1	SMPD1	68.323	26.2	12	17	12	0.86	1.078	0.932	0.886	1.026	1.273	1.194	1.147	1.13	0.969	1.195	0.021564
A0A452FGR4	Proteasome inhibitor PI31 subunit (Fragment)(predicted) OS=Capra hircus OX=9925 GN=PSMF1 PE=4 SV=1	PSMF1	30.337	9	2	3	2	0.772	0.986	0.99	0.831	1.089	1.311	1.201	1.1	1.032	1.134	1.238	0.0197197
A0A452FGU7	Calbindin 1(predicted) OS=Capra hircus OX=9925 GN=CALB1 PE=4 SV=1	CALB1	29.964	5	1	1	1	1.025	1.011	1.18	1.14	1.061	1.112	0.878	0.97	1.143	0.93	0.929	0.23086
A0A452FGX2	Midkine(predicted) OS=Capra hircus OX=9925 GN=MDK PE=4 SV=1	MDK	15.667	62.2	16	38	16	0.727	0.871	1.153	0.661	0.716	1.164	0.955	1.062	1.845	1.018	1.464	0.042441
A0A452FH12	[Pyruvate dehydrogenase [acetyl-transferring]]-phosphatase 1, mitochondrial(predicted) OS=Capra hircus OX=9925 GN=PDP1 PE=4 SV=1	PDP1	66.531	4.1	2	2	2	1.118	0.779	1	0.834	1.004	1.046	1.172	0.819	0.914	1.679	1.189	0.31768
A0A452FH19	Sorting nexin(predicted) OS=Capra hircus OX=9925 GN=SNX18 PE=4 SV=1	SNX18	69.132	1.9	1	1	1
A0A452FH26	EGF containing fibulin extracellular matrix protein 1(predicted) OS=Capra hircus OX=9925 GN=EFEMP1 PE=4 SV=1	EFEMP1	54.263	54.5	22	57	22	1.19	0.772	0.838	1.134	0.862	1.06	1.536	0.761	1.106	0.892	1.117	0.5256
A0A452FH30	Deoxyribonuclease(predicted) OS=Capra hircus OX=9925 GN=DNASE1L1 PE=4 SV=1	DNASE1L1	35.3	22.8	7	9	7	0.845	1.308	1.205	0.904	1.093	0.842	0.931	1.369	1.182	0.904	0.976	0.82942
A0A452FH59	Acetyl-CoA acetyltransferase, mitochondrial (Fragment)(predicted) OS=Capra hircus OX=9925 GN=ACAT1 PE=4 SV=1	ACAT1	43.431	22.5	8	15	8	1.013	1.007	0.699	0.805	0.789	1.272	1.186	0.846	1.076	1.63	1.393	0.038837
A0A452FH60	chromodomain-helicase-DNA-binding protein 9 isoform X1(predicted) OS=Capra hircus OX=9925 GN=CHD9 PE=4 SV=1	CHD9	319.66	0.4	1	1	1
A0A452FH66	ADP-ribosylation factor-like protein 2(predicted) OS=Capra hircus OX=9925 GN=ARL2-SNX15 PE=4 SV=1	ARL2-SNX15	20.907	11.4	2	3	2	0.691	0.806	0.513	0.722	0.607	1.811	1.899	1.131	0.94	1.266	2.111	0.00172126
A0A452FHA0	Glucose-induced degradation protein 4 homolog(predicted) OS=Capra hircus OX=9925 GN=GID4 PE=4 SV=1	GID4	25.172	15	3	3	3	0.931	0.734	0.803	1.047	0.775	1.162	1.268	1.075	1.103	1.301	1.377	0.0024998
A0A452FHB6	Cysteine dioxygenase type 1(predicted) OS=Capra hircus OX=9925 GN=CDO1 PE=4 SV=1	CDO1	22.969	8	2	4	2	1.104	0.837	0.833	1.245	0.768	1.542	1.167	0.763	0.973	1.178	1.175	0.3379
A0A452FHB8	Beta-defensin(predicted) OS=Capra hircus OX=9925 PE=4 SV=1	---	8.0727	34.8	4	6	4	0.729	0.685	0.751	0.783	0.785	1.102	1.619	1.302	1.062	1.506	1.766	0.0030575
A0A452FHC1	Arginyl-tRNA synthetase, cytoplasmic(predicted) OS=Capra hircus OX=9925 GN=RARS PE=4 SV=1	RARS	75.605	28.6	17	18	17	1.026	0.912	0.836	1.148	0.846	1.213	1.169	1.092	1.006	1.136	1.178	0.038678
A0A452FHC8	Galectin-3-binding protein(predicted) OS=Capra hircus OX=9925 GN=LGALS3BP PE=4 SV=1	LGALS3BP	61.852	32.7	18	58	18	1.244	1.074	1.338	1.193	1.077	0.783	0.782	0.921	1.194	0.778	0.752	0.0131784
A0A452FHD7	Junctional adhesion molecule A(predicted) OS=Capra hircus OX=9925 GN=F11R PE=4 SV=1	F11R	32.553	20.8	6	6	6	1.031	1.355	1.203	1.03	1.294	0.73	0.891	1.197	0.945	0.967	0.8	0.046643
A0A452FHF0	Phospholipid scramblase(predicted) OS=Capra hircus OX=9925 GN=PLSCR3 PE=4 SV=1	PLSCR3	31.717	2.4	1	1	1
A0A452FHF4	CD1e molecule(predicted) OS=Capra hircus OX=9925 GN=CD1E PE=4 SV=1	CD1E	43.671	3.1	1	1	1	0.757	1.353	0.967	0.913	0.852	0.465	0.511	1.213	2.723	0.681	1.155	0.84106
A0A452FHF8	Prefoldin 6(predicted) OS=Capra hircus OX=9925 GN=PFDN6 PE=4 SV=1	PFDN6	14.527	20.9	4	5	4	0.935	1.038	0.643	1.036	0.868	1.806	1.024	0.882	0.993	1.068	1.277	0.178243
A0A452FHH1	AP complex subunit beta(predicted) OS=Capra hircus OX=9925 GN=AP1B1 PE=4 SV=1	AP1B1	103.36	21.9	17	21	9	0.93	0.738	0.838	0.922	0.79	1.293	1.639	1.189	0.821	1.188	1.453	0.0182559
A0A452FHI6	Pterin-4 alpha-carbinolamine dehydratase 1 (Fragment)(predicted) OS=Capra hircus OX=9925 GN=PCBD1 PE=4 SV=1	PCBD1	12.044	16.5	2	2	2	1.181	1.103	0.88	1.16	1.512	1.169	0.841	0.845	0.787	0.945	0.786	0.065998
A0A452FHL1	Sperm acrosome-associated protein 5(predicted) OS=Capra hircus OX=9925 GN=LOC102179274 PE=4 SV=1	LOC102179274	17.613	7.1	2	8	2	1.461	1.33	0.852	1.361	1.499	0.713	0.722	0.568	0.686	0.814	0.539	0.0009196
A0A452FHU1	GDP-fucose protein O-fucosyltransferase 1(predicted) OS=Capra hircus OX=9925 GN=POFUT1 PE=4 SV=1	POFUT1	42.046	2.4	1	1	1
A0A452FHU8	Coiled-coil domain-containing protein 91 (Fragment)(predicted) OS=Capra hircus OX=9925 GN=CCDC91 PE=4 SV=1	CCDC91	46.701	8.4	3	4	3	1.259	0.972	0.805	1.212	0.99	0.89	0.969	1.346	1.012	0.739	0.946	0.64012
A0A452FHV6	Phospholipid transfer protein(predicted) OS=Capra hircus OX=9925 GN=PLTP PE=4 SV=1	PLTP	55.022	5.6	2	2	2
A0A452FHV8	Adenylyl cyclase-associated protein(predicted) OS=Capra hircus OX=9925 GN=CAP1 PE=4 SV=1	CAP1	51.238	11	6	6	6	0.819	1.173	1.034	0.904	1.272	1.571	0.809	0.866	1.05	0.833	0.986	0.82262
A0A452FHW0	Folate receptor alpha(predicted) OS=Capra hircus OX=9925 GN=FOLR1 PE=4 SV=1	FOLR1	29.161	8.8	2	2	2
A0A452FHZ0	Lipocalin 2(predicted) OS=Capra hircus OX=9925 GN=LCN2 PE=4 SV=1	LCN2	23.017	19	3	4	3	0.994	1.095	1.41	1.375	1.033	0.67	0.934	1.215	0.91	0.965	0.795	0.084018
A0A452FI25	RNASET2 protein (Fragment)(predicted) OS=Capra hircus OX=9925 GN=RNASET2 PE=4 SV=1	RNASET2	23.261	28.6	5	9	5	1.116	1.021	1.139	1.082	0.939	0.909	0.928	1.105	1.365	0.75	0.955	0.56156
A0A452FI84	26S proteasome non-ATPase regulatory subunit 5(predicted) OS=Capra hircus OX=9925 GN=PSMD5 PE=4 SV=1	PSMD5	56.074	11.9	5	5	5	0.864	0.904	0.839	0.945	1.162	1.1	1.061	1.269	1.093	1.143	1.202	0.020418
A0A452FIB5	Predicted gene, 21936(predicted) OS=Capra hircus OX=9925 GN=EIF1AX PE=4 SV=1	EIF1AX	15.999	7.1	1	1	1
A0A452FIF4	Tektin-5(predicted) OS=Capra hircus OX=9925 GN=TEKT5 PE=4 SV=1	TEKT5	56.487	11	6	7	6	1.491	0.829	2.533	1.565	0.895	0.512	0.654	0.642	0.659	0.661	0.428	0.021544
A0A452FIF9	Glutamyl-prolyl-tRNA synthetase(predicted) OS=Capra hircus OX=9925 GN=EPRS PE=4 SV=1	EPRS	169.78	5.2	7	9	7	1.506	0.88	0.73	1.797	0.884	1.053	0.832	0.8	0.801	0.899	0.756	0.28688
A0A452FIG7	S-formylglutathione hydrolase(predicted) OS=Capra hircus OX=9925 GN=ESD PE=4 SV=1	ESD	31.536	27.7	6	7	6	0.755	0.826	1.038	0.924	0.919	1.406	1.412	0.951	1.108	1.265	1.377	0.0096047
A0A452FIJ0	Queuosine salvage protein(predicted) OS=Capra hircus OX=9925 GN=C9orf64 PE=4 SV=1	C9orf64	39.014	3.2	1	1	1
A0A452FIK1	E3 ubiquitin-protein ligase RNF126(predicted) OS=Capra hircus OX=9925 GN=RNF126 PE=4 SV=1	RNF126	33.953	9.9	3	3	3	0.881	0.953	1.021	0.964	0.905	1.193	1.104	1.154	1.014	1.261	1.212	0.002795
A0A452FIL7	RAS related 2(predicted) OS=Capra hircus OX=9925 GN=RRAS2 PE=4 SV=1	RRAS2	16.156	11.3	1	1	1	0.721	1.079	1.046	0.982	1.082	1.083	1.033	1.688	1.006	0.84	1.151	0.403
A0A452FIP8	LARGE xylosyl- and glucuronyltransferase 2 isoform X2(predicted) OS=Capra hircus OX=9925 GN=LARGE2 PE=4 SV=1	LARGE2	78.947	2.6	2	2	2
A0A452FIW6	C-X-C motif chemokine(predicted) OS=Capra hircus OX=9925 GN=CXCL9 PE=4 SV=1	CXCL9	14.142	8	1	2	1	1.628	0.649	1.661	3.014	0.787	0.546	0.695	0.479	0.568	0.42	0.35	0.034923
A0A452FIX0	Proto-oncogene tyrosine-protein kinase receptor Ret(predicted) OS=Capra hircus OX=9925 GN=RET PE=4 SV=1	RET	123.74	18.1	20	35	20	1.21	0.877	1.033	1.25	0.861	0.906	0.965	1.415	0.866	1.004	0.986	0.87812
A0A452FIX9	Solute carrier family 46 member 2 OS=Capra hircus OX=9925 GN=SLC46A2 PE=4 SV=1	SLC46A2	50.585	2.6	1	1	1	0.676	0.848	0.965	0.691	0.96	1.13	0.799	1.519	1.602	1.291	1.532	0.023464
A0A452FJ00	mRNA export factor(predicted) OS=Capra hircus OX=9925 GN=RAE1 PE=4 SV=1	RAE1	40.981	4.6	2	2	2
A0A452FJ07	Alpha-1-antitrypsin transcript variant 1(predicted) OS=Capra hircus OX=9925 GN=SERPINA1 PE=4 SV=1	SERPINA1	48.709	20.6	10	5	2	1.145	1.083	1.716	1.132	1.147	0.868	0.933	1.148	0.741	0.763	0.716	0.020941
A0A452FJ09	Phospholipase A2 group VI(predicted) OS=Capra hircus OX=9925 GN=PLA2G6 PE=4 SV=1	PLA2G6	84.037	4.8	4	4	4	0.74	0.765	0.795	0.725	0.857	0.786	1.175	1.397	1.421	1.59	1.641	0.021019
A0A452FJ15	Nucleoside diphosphate kinase(predicted) OS=Capra hircus OX=9925 GN=NME2 PE=4 SV=1	NME2	17.265	65.1	9	30	6	1.114	0.981	0.832	1.053	0.914	1.538	1.165	0.941	0.914	0.923	1.12	0.41466
A0A452FJ27	Dynactin subunit 2(predicted) OS=Capra hircus OX=9925 GN=DCTN2 PE=4 SV=1	DCTN2	44.689	46.3	15	25	15	1.004	0.955	0.866	0.919	0.891	0.876	1.341	0.989	1.129	1.23	1.201	0.063658
A0A452FJ29	Ubiquitin-like modifier-activating enzyme 1(predicted) OS=Capra hircus OX=9925 GN=UBA1 PE=4 SV=1	UBA1	117.5	26.9	28	48	28	0.784	0.909	0.766	0.818	0.83	1.349	1.404	0.974	1.161	1.29	1.504	0.00051923
A0A452FJ33	CD44 antigen(predicted) OS=Capra hircus OX=9925 GN=CD44 PE=4 SV=1	CD44	38.737	5.9	2	2	2	1.397	1.248	0.96	1.59	1.143	0.747	0.767	0.842	0.968	0.771	0.646	0.0024605
A0A452FJ40	Membrane cofactor protein(predicted) OS=Capra hircus OX=9925 GN=LOC102169209 PE=4 SV=1	LOC102169209	35.969	3.9	1	1	1	1.116	1.267	1.153	1.069	1.188	1.259	0.894	0.898	0.85	0.771	0.806	0.03166
A0A452FJ47	Ral GTPase-activating protein subunit alpha-1(predicted) OS=Capra hircus OX=9925 GN=RALGAPA1 PE=4 SV=1	RALGAPA1	226.7	0.4	1	1	1	0.75	0.893	0.815	0.904	0.819	0.949	1.504	1.247	1.138	1.403	1.493	0.0021775
A0A452FJ50	protein lifeguard 2-like(predicted) OS=Capra hircus OX=9925 GN=TMBIM7P PE=4 SV=1	TMBIM7P	33.003	5.1	1	2	1	1.545	0.795	0.853	1.127	0.807	1.112	1.063	1.096	0.855	1.188	1.036	0.65596
A0A452FJ56	Neuroplastin (Fragment)(predicted) OS=Capra hircus OX=9925 GN=NPTN PE=4 SV=1	NPTN	40.911	16.6	6	12	6	1.33	1.06	1.152	1.231	1.172	0.848	0.841	0.829	0.84	0.94	0.723	8.0247e-05
A0A452FJ61	NAD(P)(+)--arginine ADP-ribosyltransferase(predicted) OS=Capra hircus OX=9925 GN=ART3 PE=4 SV=1	ART3	43.69	36.7	19	44	19	1.091	1.011	1.073	1.115	1.127	0.923	1.162	0.897	0.99	0.96	0.91	0.082939
A0A452FJ88	Secretory carrier-associated membrane protein(predicted) OS=Capra hircus OX=9925 GN=SCAMP2 PE=4 SV=1	SCAMP2	36.729	17.1	5	6	5	0.918	0.915	1.189	0.906	0.801	0.879	1.169	0.934	1.211	1.138	1.127	0.22426
A0A452FJ99	Growth arrest-specific protein 8 (Fragment)(predicted) OS=Capra hircus OX=9925 GN=GAS8 PE=4 SV=1	GAS8	56.193	2.3	1	1	1	2.221	1.102	0.926	2.029	1.008	0.429	0.702	0.658	0.641	0.7	0.43	0.005019
A0A452FJB0	Sorbitol dehydrogenase(predicted) OS=Capra hircus OX=9925 GN=SORD PE=4 SV=1	SORD	38.126	66.3	23	113	23	0.811	0.941	0.724	0.843	0.929	1.431	1.343	0.916	1	1.233	1.394	0.0111246
A0A452FJC1	Coronin(predicted) OS=Capra hircus OX=9925 GN=CORO1A PE=4 SV=1	CORO1A	50.951	4.1	2	2	2
A0A452FJD0	Lymphocyte antigen 6 family member G5C(predicted) OS=Capra hircus OX=9925 GN=LY6G5C PE=4 SV=1	LY6G5C	15.66	29.4	3	3	3	1.743	0.414	0.589	1.704	0.43	1.285	1.213	0.591	0.556	1.796	1.115	0.60028
A0A452FJD1	L-2-hydroxyglutarate dehydrogenase, mitochondrial(predicted) OS=Capra hircus OX=9925 GN=L2HGDH PE=4 SV=1	L2HGDH	46.02	4.1	2	2	2	1.405	0.966	1	1.263	1.699	0.789	0.831	0.681	0.805	0.948	0.64	0.006704
A0A452FJD3	Beta-defensin(predicted) OS=Capra hircus OX=9925 PE=4 SV=1	---	14.259	13	2	3	2	0.859	0.666	0.47	1	0.645	2.327	1.758	0.885	0.773	0.95	1.839	0.061403
A0A452FJD9	Cartilage acidic protein 1(predicted) OS=Capra hircus OX=9925 GN=CRTAC1 PE=4 SV=1	CRTAC1	70.282	32.1	16	26	16	1.32	0.657	1.993	1.222	0.766	0.832	0.846	0.856	0.956	0.892	0.735	0.31702
A0A452FJE8	4-trimethylaminobutyraldehyde dehydrogenase(predicted) OS=Capra hircus OX=9925 GN=ALDH9A1 PE=4 SV=1	ALDH9A1	53.917	32	16	35	16	0.851	1.052	0.845	0.846	0.971	1.365	1.169	1.001	1.01	1.233	1.266	0.0141957
A0A452FJF7	Eukaryotic translation initiation factor 3 subunit I(predicted) OS=Capra hircus OX=9925 GN=EIF3I PE=4 SV=1	EIF3I	36.472	13.2	4	4	4	1.303	0.899	0.804	1.388	0.743	1.252	1.064	1.073	1.028	1.011	1.057	0.55738
A0A452FJF9	Serotransferrin(predicted) OS=Capra hircus OX=9925 GN=TF PE=4 SV=1	TF	76.951	68.1	55	57	28	1.309	0.927	2.051	1.249	0.929	0.511	0.763	1.13	0.803	0.721	0.608	0.036099
A0A452FJG5	Polycystic kidney disease 2-like 2(predicted) OS=Capra hircus OX=9925 GN=PKD2L2 PE=4 SV=1	PKD2L2	71.09	18.5	11	13	11	1.602	0.919	1.623	1.611	1.212	0.581	0.717	0.696	0.665	0.747	0.489	0.00042064
A0A452FJG6	COP9 signalosome complex subunit 2 isoform X2(predicted) OS=Capra hircus OX=9925 GN=COPS2 PE=4 SV=1	COPS2	51.596	4.7	2	2	2	0.972	0.805	0.853	0.961	0.721	1.161	1.261	1.27	1.208	1.236	1.423	0.0035586
A0A452FJH6	Ankyrin repeat and sterile alpha motif domain containing 1B(predicted) OS=Capra hircus OX=9925 GN=ANKS1B PE=4 SV=1	ANKS1B	21.04	4.8	1	1	1	0.903	0.984	0.917	0.917	1.235	1.604	1.3	0.782	1.002	0.774	1.102	0.6936
A0A452FJK9	Secreted frizzled-related protein 3(predicted) OS=Capra hircus OX=9925 GN=FRZB PE=4 SV=1	FRZB	36.249	9.8	4	8	4	0.682	0.756	1.101	0.795	0.736	0.549	3.324	1.001	1.026	0.8	1.646	0.38986
A0A452FJL2	Serpin B10(predicted) OS=Capra hircus OX=9925 GN=SERPINB10 PE=4 SV=1	SERPINB10	45.022	3.8	1	1	1
A0A452FJN2	ADPRM(predicted) OS=Capra hircus OX=9925 GN=ADPRM PE=4 SV=1	ADPRM	39.206	6.5	2	2	2	1.248	1.115	0.921	1.151	1.172	1.209	1.061	0.757	0.91	0.869	0.857	0.129441
A0A452FJS0	Fertilin alpha (Fragment)(predicted) OS=Capra hircus OX=9925 GN=LOC102177554 PE=4 SV=1	LOC102177554	88.041	19.5	14	50	14	1.723	1.294	1.724	1.592	1.292	0.578	0.531	0.403	0.522	0.637	0.35	3.0454e-06
A0A452FJU6	Lysyl oxidase-like 1(predicted) OS=Capra hircus OX=9925 GN=LOXL1 PE=4 SV=1	LOXL1	64.548	23.5	12	23	12	0.952	1.162	1.233	1.041	1.031	0.798	0.893	1.198	1.137	0.869	0.903	0.2648
A0A452FJV4	Cyclin F(predicted) OS=Capra hircus OX=9925 GN=CCNF PE=4 SV=1	CCNF	86.807	1.2	1	1	1	0.673	0.533	5.393	0.563	1.269	0.356	0.459	0.523	0.517	0.366	0.263	0.114016
A0A452FJW6	Lkb1(predicted) OS=Capra hircus OX=9925 GN=STK11 PE=4 SV=1	STK11	48.182	3.3	1	1	1	0.838	0.946	0.805	0.89	0.854	1.078	1.213	1.288	1.516	1.02	1.411	0.0020432
A0A452FK04	Fibronectin(predicted) OS=Capra hircus OX=9925 GN=FN1 PE=4 SV=1	FN1	262.37	14.2	26	31	26	1.027	1.424	1.394	1.002	1.216	0.559	0.857	1.07	0.912	0.942	0.716	0.03138
A0A452FK27	Heat shock 70 kDa protein 13(predicted) OS=Capra hircus OX=9925 GN=HSPA13 PE=4 SV=1	HSPA13	51.817	30.8	17	28	17	0.894	0.851	0.837	0.894	0.784	1.16	1.382	1.268	1.17	1.051	1.416	0.000163038
A0A452FK47	Acylphosphatase(predicted) OS=Capra hircus OX=9925 GN=ACYP1 PE=4 SV=1	ACYP1	11.46	51.5	6	10	6	1.205	0.894	0.857	1.349	0.917	1.757	0.924	0.996	0.801	0.652	0.982	0.75768
A0A452FK56	Cystatin(predicted) OS=Capra hircus OX=9925 GN=LOC102183975 PE=4 SV=1	LOC102183975	16.39	19.1	2	3	2	1.549	1.072	0.707	1.695	1.065	1.599	0.858	0.586	0.617	0.668	0.711	0.163077
A0A452FK61	LOC508963 protein(predicted) OS=Capra hircus OX=9925 GN=OTULIN PE=4 SV=1	OTULIN	40.015	4.3	2	2	2
A0A452FK68	LY6/PLAUR domain-containing 9(predicted) OS=Capra hircus OX=9925 GN=LOC102179561 PE=4 SV=1	LOC102179561	16.128	49.3	10	23	10	1.253	1.111	0.984	1.315	1.342	0.888	0.838	0.654	0.916	0.929	0.704	0.0036439
A0A452FK79	ATP synthase subunit f, mitochondrial(predicted) OS=Capra hircus OX=9925 GN=ATP5MF PE=4 SV=1	ATP5MF	10.345	12.5	1	1	1	1.421	0.728	2.355	1.408	0.749	0.547	0.859	0.755	0.804	0.862	0.575	0.082917
A0A452FK82	Rho GDP-dissociation inhibitor 1(predicted) OS=Capra hircus OX=9925 GN=ARHGDIA PE=4 SV=1	ARHGDIA	23.421	30.4	5	12	5	0.862	0.985	0.822	0.896	1.048	1.424	1.22	0.983	1.097	1.187	1.281	0.0120015
A0A452FK89	Ran-binding protein 9(predicted) OS=Capra hircus OX=9925 GN=RANBP9 PE=4 SV=1	RANBP9	70.434	9.3	6	8	6	0.834	0.816	0.835	0.823	0.844	1.453	1.358	1.003	1.117	1.303	1.501	0.0042616
A0A452FKE5	complement C4 isoform X1(predicted) OS=Capra hircus OX=9925 GN=LOC102189753 PE=4 SV=1	LOC102189753	190.81	29.1	45	22	8	1.451	0.899	1.513	1.404	0.797	0.737	0.765	1.131	0.939	0.776	0.717	0.082397
A0A452FKE9	Acetyl-coenzyme A synthetase(predicted) OS=Capra hircus OX=9925 GN=ACSS1 PE=4 SV=1	ACSS1	74.351	30.7	18	25	18	1.423	0.964	0.946	1.16	0.946	0.986	0.883	0.852	0.844	1.131	0.863	0.189996
A0A452FKG3	Phospholipase B1, membrane-associated (Fragment)(predicted) OS=Capra hircus OX=9925 GN=PLB1 PE=4 SV=1	PLB1	130.94	2.2	2	2	2	0.943	0.667	0.772	0.912	0.898	2.136	1.31	0.988	0.913	0.909	1.492	0.080225
A0A452FKG7	Golgi to ER traffic protein 4 homolog(predicted) OS=Capra hircus OX=9925 GN=GET4 PE=4 SV=1	GET4	36.192	19.3	6	10	6	0.839	0.841	0.884	1.042	0.805	1.138	1.218	1.195	1.098	1.26	1.34	0.00042458
A0A452FKH0	Semaphorin 4B(predicted) OS=Capra hircus OX=9925 GN=SEMA4B PE=4 SV=1	SEMA4B	91.684	4.7	4	4	4	0.734	1.116	1.067	0.729	1.029	0.989	1.236	1.27	1.109	1.185	1.238	0.060877
A0A452FKI3	UTP--glucose-1-phosphate uridylyltransferase (Fragment)(predicted) OS=Capra hircus OX=9925 GN=UGP2 PE=4 SV=1	UGP2	56.376	45.4	24	47	24	1.142	0.962	0.842	1.153	0.905	1.295	1.17	0.816	0.932	1.089	1.06	0.62516
A0A452FKJ3	Plasma membrane calcium-transporting ATPase 4(predicted) OS=Capra hircus OX=9925 GN=LOC102176524 PE=4 SV=1	LOC102176524	134.6	18.3	18	22	18	1.195	1.026	1.085	1.11	1.322	1.042	0.994	0.748	0.967	0.988	0.826	0.029504
A0A452FKK3	Prefoldin subunit 2(predicted) OS=Capra hircus OX=9925 GN=PFDN2 PE=4 SV=1	PFDN2	16.648	14.9	2	4	2	0.848	1.114	0.674	0.965	0.948	1.717	0.992	1.057	0.956	1.232	1.309	0.093279
A0A452FKL3	L-serine dehydratase/L-threonine deaminase(predicted) OS=Capra hircus OX=9925 GN=SDS PE=4 SV=1	SDS	33.364	3.5	1	1	1
A0A452FKN8	TKT protein(predicted) OS=Capra hircus OX=9925 GN=TKT PE=4 SV=1	TKT	67.89	9	4	5	4	0.901	1.376	1.276	1.061	1.355	0.819	0.803	0.958	0.918	1.03	0.759	0.021622
A0A452FKP1	EF-hand calcium-binding domain-containing protein 6(predicted) OS=Capra hircus OX=9925 GN=EFCAB6 PE=4 SV=1	EFCAB6	164.2	1.4	2	2	2	1.721	1.073	1.128	2.053	1.144	0.872	0.552	0.564	0.723	0.595	0.464	0.00147723
A0A452FKQ5	MHC class I antigen(predicted) OS=Capra hircus OX=9925 PE=4 SV=1	---	41.508	5.7	2	4	0
A0A452FKQ7	CMP-N-acetylneuraminate-beta-galactosamide-alpha-2, 3-sialyltransferase 1 (Fragment)(predicted) OS=Capra hircus OX=9925 GN=ST3GAL1 PE=4 SV=1	ST3GAL1	38.889	35.4	12	17	12	0.84	1.187	1.174	0.857	1.049	0.707	1.087	1.253	1.169	1.051	1.031	0.85554
A0A452FKR7	Disintegrin and metalloproteinase domain-containing protein 18(predicted) OS=Capra hircus OX=9925 GN=LOC102186109 PE=4 SV=1	LOC102186109	81.279	19.2	11	24	10	1.584	1.032	1.498	1.494	1.352	0.733	0.608	0.544	0.719	0.871	0.499	0.00024336
A0A452FKS3	Mitochondrial intermediate peptidase(predicted) OS=Capra hircus OX=9925 GN=MIPEP PE=4 SV=1	MIPEP	79.5	1.6	1	1	1	0.933	1.003	1.348	0.998	1.008	0.762	1.077	1.039	1.281	0.996	0.974	0.77822
A0A452FKT0	Annexin(predicted) OS=Capra hircus OX=9925 GN=ANXA5 PE=4 SV=1	ANXA5	35.934	48	15	26	15	1.036	0.927	0.94	0.995	1.006	1.313	1.114	0.933	0.963	1.092	1.104	0.187759
A0A452FKU2	Citrate lyase beta like(predicted) OS=Capra hircus OX=9925 GN=CLYBL PE=4 SV=1	CLYBL	36.499	6.1	2	2	2
A0A452FKZ7	Cystatin(predicted) OS=Capra hircus OX=9925 GN=CST11 PE=4 SV=1	CST11	16.271	18.7	3	3	3	1.739	0.714	0.566	1.831	0.799	1.146	1.214	0.699	0.82	0.853	0.838	0.76108
A0A452FL03	Cullin 4B(predicted) OS=Capra hircus OX=9925 GN=CUL4B PE=4 SV=1	CUL4B	100.99	6.9	6	7	2
A0A452FL06	Beta-centractin(predicted) OS=Capra hircus OX=9925 GN=ACTR1B PE=4 SV=1	ACTR1B	42.294	14.1	6	6	2	0.871	0.813	0.618	1.059	1.076	1.248	1.411	0.894	1.212	1.173	1.338	0.044484
A0A452FL40	Serine/threonine-protein phosphatase 2A 56 kDa regulatory subunit(predicted) OS=Capra hircus OX=9925 GN=PPP2R5C PE=4 SV=1	PPP2R5C	52.963	12.3	5	5	5	0.776	0.921	0.862	0.91	0.774	1.637	1.338	1.072	1.272	0.976	1.484	0.0045164
A0A452FL62	Semaphorin-3F(predicted) OS=Capra hircus OX=9925 GN=SEMA3F PE=4 SV=1	SEMA3F	86.173	55.5	34	65	34	0.77	1.19	1.255	0.833	1.065	0.66	1.167	1.511	1.062	0.929	1.042	0.89108
A0A452FL63	Vacuolar protein sorting-associated protein VTA1-like protein(predicted) OS=Capra hircus OX=9925 GN=VTA1 PE=4 SV=1	VTA1	33.937	9.4	2	2	2	1.225	1.237	1.027	0.889	0.966	0.75	1.126	1.198	1.044	1.003	0.958	0.66668
A0A452FL64	Resistin(predicted) OS=Capra hircus OX=9925 GN=RETN PE=4 SV=1	RETN	11.534	27.5	2	2	2	1.332	1.022	1.38	2.04	1.196	0.666	0.651	0.728	0.587	0.843	0.499	0.00081767
A0A452FL66	MHC class I antigen(predicted) OS=Capra hircus OX=9925 PE=4 SV=1	---	40.994	11.1	3	4	0
A0A452FL85	Profilin(predicted) OS=Capra hircus OX=9925 GN=PFN2 PE=4 SV=1	PFN2	15.032	13.6	3	3	3	0.653	0.914	0.955	0.684	1.028	1.642	0.988	1.186	1.14	1.268	1.47	0.0143016
A0A452FLA8	60S ribosomal protein L12(predicted) OS=Capra hircus OX=9925 PE=4 SV=1	---	17.051	37.1	4	4	1	1.024	1.425	1.075	1.124	1.111	1.095	0.818	1.064	0.927	0.82	0.82	0.046096
A0A452FLB4	Arginase(predicted) OS=Capra hircus OX=9925 GN=ARG1 PE=4 SV=1	ARG1	34.18	21.4	5	10	5	0.894	1.068	1.068	0.997	1.144	0.952	1.171	1.038	0.905	1.204	1.019	0.8226
A0A452FLC3	Coiled-coil domain-containing protein 27 (Fragment)(predicted) OS=Capra hircus OX=9925 GN=CCDC27 PE=4 SV=1	CCDC27	75.36	5.2	3	3	3	1.154	1.075	1.252	1.068	1.414	0.676	0.672	1.099	0.773	0.93	0.696	0.0087157
A0A452FLC9	EF-hand domain-containing protein KIAA0494(predicted) OS=Capra hircus OX=9925 GN=EFCAB14 PE=4 SV=1	EFCAB14	55.042	10.9	5	7	5	0.625	0.837	0.701	0.637	0.738	2.241	1.311	1.111	1.208	1.159	1.987	0.00152216
A0A452FLE7	Glypican-6(predicted) OS=Capra hircus OX=9925 PE=4 SV=1	---	32.543	5.7	1	1	1
A0A452FLF9	RNA binding motif protein 26(predicted) OS=Capra hircus OX=9925 GN=RBM26 PE=4 SV=1	RBM26	110.3	0.9	1	2	1	0.87	0.856	1.007	0.836	0.884	0.73	1.016	1.686	1.521	1.104	1.36	0.156896
A0A452FLG6	Deoxyribonuclease(predicted) OS=Capra hircus OX=9925 GN=DNASE1L3 PE=4 SV=1	DNASE1L3	35.147	76.3	34	198	34	0.694	1.444	1.083	0.719	1.157	0.675	0.762	1.336	1.337	1.125	1.027	0.8966
A0A452FLP1	Regulator of microtubule dynamics protein 1(predicted) OS=Capra hircus OX=9925 GN=RMDN1 PE=4 SV=1	RMDN1	32.501	16.7	5	6	5	1.016	1.616	0.839	1.064	1.447	1.221	0.726	0.697	0.917	0.868	0.74	0.098283
A0A452FLQ3	T-complex protein 1 subunit zeta(predicted) OS=Capra hircus OX=9925 PE=4 SV=1	---	53.691	16.5	7	24	1	0.769	0.658	0.68	0.711	0.706	1.988	1.201	1.076	1.097	1.285	1.886	0.0061397
A0A452FLT6	Phosphorylase b kinase regulatory subunit(predicted) OS=Capra hircus OX=9925 GN=PHKA1 PE=4 SV=1	PHKA1	130.88	1	1	1	1	0.756	0.898	1.126	0.894	0.665	0.818	1.184	1.47	1.344	1.324	1.415	0.035285
A0A452FLW9	CD109 molecule(predicted) OS=Capra hircus OX=9925 GN=CD109 PE=4 SV=1	CD109	161.7	11.3	14	16	14	1.187	0.957	0.953	1.295	1.042	0.86	1.042	0.856	0.917	1.047	0.869	0.105818
A0A452FLX3	Aldehyde dehydrogenase family 16 member A1(predicted) OS=Capra hircus OX=9925 GN=ALDH16A1 PE=4 SV=1	ALDH16A1	85.01	15.6	9	11	9	0.855	0.823	0.862	0.882	0.962	1.199	1.231	1.297	1.013	1.268	1.37	0.000279
A0A452FLX5	Testis-specific lysozyme-like protein 2(predicted) OS=Capra hircus OX=9925 GN=LOC102188781 PE=4 SV=1	LOC102188781	16.791	37.2	7	23	7	1.401	1.494	0.699	1.036	1.647	0.909	0.696	0.521	0.708	0.886	0.593	0.027701
A0A452FLZ3	Regulator of microtubule dynamics protein 2(predicted) OS=Capra hircus OX=9925 GN=RMDN2 PE=4 SV=1	RMDN2	46.652	7.8	4	4	4	0.974	0.838	0.958	1.028	1.085	1.049	1.13	0.946	1.104	1.254	1.123	0.105856
A0A452FM00	Fatty acid binding protein 5(predicted) OS=Capra hircus OX=9925 GN=FABP5 PE=4 SV=1	FABP5	15.104	59.3	10	26	10	0.834	0.922	0.777	0.885	0.921	1.579	1.204	0.974	1.094	1.178	1.389	0.006177
A0A452FM11	Tubulin beta chain(predicted) OS=Capra hircus OX=9925 GN=TUBB4B PE=4 SV=1	TUBB4B	50.017	46.9	20	67	4	1.042	1.044	1.033	1.061	0.956	1.099	1.016	1.099	0.969	0.918	0.993	0.83304
A0A452FM49	serine/threonine-protein phosphatase 6 regulatory ankyrin repeat subunit A isoform X1(predicted) OS=Capra hircus OX=9925 GN=ANKRD28 PE=4 SV=1	ANKRD28	109.05	3.3	3	3	3	0.908	0.656	0.663	0.923	0.684	1.152	1.766	1.161	1.186	1.302	1.713	0.00136128
A0A452FM54	Protein DJ-1(predicted) OS=Capra hircus OX=9925 GN=PARK7 PE=4 SV=1	PARK7	20.049	80.4	15	43	15	1.172	1.03	0.942	1.086	1.077	1.234	1.041	0.888	0.928	1.104	0.979	0.71876
A0A452FM59	Haloacid dehalogenase-like hydrolase domain containing 1A(predicted) OS=Capra hircus OX=9925 GN=PUDP PE=4 SV=1	PUDP	25.29	35.1	6	8	6	0.87	1.072	0.976	0.957	0.953	1.143	0.979	1.043	0.964	1.001	1.063	0.21352
A0A452FM61	Protein phosphatase 1B(predicted) OS=Capra hircus OX=9925 GN=PPM1B PE=4 SV=1	PPM1B	53.44	25	10	14	8	0.869	0.868	0.669	0.934	0.853	1.357	1.331	1.109	1.166	1.146	1.457	0.00065908
A0A452FM75	Huntingtin-interacting protein 1 (Fragment)(predicted) OS=Capra hircus OX=9925 GN=HIP1 PE=4 SV=1	HIP1	114.11	33	32	56	32	0.851	0.741	0.79	0.925	0.693	1.17	1.586	1.079	0.97	1.279	1.521	0.0029797
A0A452FMD2	Cilia and flagella associated protein 61(predicted) OS=Capra hircus OX=9925 GN=CFAP61 PE=4 SV=1	CFAP61	142.17	2.3	2	2	2	1.693	1.109	1.321	1.355	1.045	0.938	0.779	0.792	0.782	0.65	0.604	0.00131814
A0A452FMD5	GLI pathogenesis-related 2(predicted) OS=Capra hircus OX=9925 GN=GLIPR2 PE=4 SV=1	GLIPR2	18.158	18.5	2	2	2	1.063	0.999	0.923	1.158	1.18	1.522	0.769	0.758	1.174	0.87	0.957	0.59894
A0A452FMF5	NCK interacting protein with SH3 domain(predicted) OS=Capra hircus OX=9925 GN=NCKIPSD PE=4 SV=1	NCKIPSD	78.131	2.7	2	2	2	0.747	0.876	0.85	0.784	0.725	1.185	1.427	1.255	1.145	1.437	1.62	3.9981e-05
A0A452FMG1	Afadin, adherens junction formation factor(predicted) OS=Capra hircus OX=9925 GN=AFDN PE=4 SV=1	AFDN	197.85	0.6	1	1	1	1.05	1.247	1.025	0.895	0.897	0.838	0.887	1.194	1.145	1.277	1.044	0.72984
A0A452FMI7	Glia maturation factor beta(predicted) OS=Capra hircus OX=9925 GN=GMFB PE=4 SV=1	GMFB	14.262	7.5	1	1	1
A0A452FML7	Cilia and flagella associated protein 69(predicted) OS=Capra hircus OX=9925 GN=CFAP69 PE=4 SV=1	CFAP69	99.172	1.3	1	1	1	1.462	1.053	0.904	1.216	1.285	0.928	0.827	0.958	0.846	0.957	0.763	0.019183
A0A452FMP9	cytosolic carboxypeptidase 2 isoform X2(predicted) OS=Capra hircus OX=9925 GN=AGBL2 PE=4 SV=1	AGBL2	88.923	1.1	1	1	1
A0A452FMR3	Pyruvate carboxylase, mitochondrial(predicted) OS=Capra hircus OX=9925 GN=PC PE=4 SV=1	PC	129.74	0.8	1	1	1
A0A452FMR6	Membrane primary amine oxidase(predicted) OS=Capra hircus OX=9925 GN=LOC102182869 PE=4 SV=1	LOC102182869	82.359	29.8	22	68	8	1.312	1.861	0.976	0.945	1.389	0.61	0.691	0.851	0.988	0.84	0.614	0.0142598
A0A452FMT2	RPS2(predicted) OS=Capra hircus OX=9925 GN=LOC108634081 PE=4 SV=1	LOC108634081	31.235	15.7	4	4	4	1.389	0.874	0.781	1.987	0.775	1.072	0.84	0.8	0.917	0.763	0.756	0.3384
A0A452FMU8	Mucin-1(predicted) OS=Capra hircus OX=9925 GN=MUC1 PE=4 SV=1	MUC1	57.944	3.1	2	2	2	0.979	0.957	1.162	1.078	1.145	1.485	0.912	0.768	1.178	0.767	0.96	0.62334
A0A452FMX3	Plectin(predicted) OS=Capra hircus OX=9925 GN=PLEC PE=4 SV=1	PLEC	469.68	0.9	4	4	4	1.173	0.991	1.078	1.056	0.977	1.096	1.1	1.176	1.007	0.829	0.987	0.804
A0A452FMX8	Serine/threonine-protein phosphatase(predicted) OS=Capra hircus OX=9925 GN=PPP4C PE=4 SV=1	PPP4C	35.08	20.5	5	9	3	0.844	1.024	0.961	0.869	1.056	1.068	1.217	1.248	1.122	1.136	1.218	0.0051425
A0A452FMZ7	Heat shock protein 90 alpha family class A member 1(predicted) OS=Capra hircus OX=9925 GN=HSP90AA1 PE=4 SV=1	HSP90AA1	84.73	48.7	39	103	25	0.955	0.889	0.714	1.036	0.84	1.404	1.24	0.949	1.038	1.192	1.313	0.0196153
A0A452FN04	SCYL2 protein(predicted) OS=Capra hircus OX=9925 GN=SCYL2 PE=4 SV=1	SCYL2	96.802	1.6	1	1	1	0.85	0.966	0.94	0.788	0.936	0.964	1.387	1.566	1.047	1.06	1.345	0.023216
A0A452FN13	peptidyl-glycine alpha-amidating monooxygenase isoform X10(predicted) OS=Capra hircus OX=9925 GN=PAM PE=4 SV=1	PAM	88.6	12.9	8	8	8	1.168	1.053	1.233	1.058	1.22	1.067	0.922	0.753	1.009	0.899	0.811	0.0143377
A0A452FN24	Cytokeratin-2P(predicted) OS=Capra hircus OX=9925 GN=KRT3 PE=4 SV=1	KRT3	56.042	19.4	11	1	0
A0A452FN92	SERPINF2(predicted) OS=Capra hircus OX=9925 GN=SERPINF2 PE=4 SV=1	SERPINF2	50.934	31.9	20	45	13	1.054	1.06	0.635	0.975	1.271	1.5	1.011	0.814	0.918	0.931	1.036	0.8209
A0A452FNB2	Ly6/PLAUR domain-containing protein 4(predicted) OS=Capra hircus OX=9925 GN=LYPD4 PE=4 SV=1	LYPD4	26.788	32.1	7	12	7	0.984	0.93	0.824	0.954	1.154	0.91	1.166	1.046	1.016	1.143	1.09	0.24544
A0A452FNC0	Saccharopine dehydrogenase-like oxidoreductase(predicted) OS=Capra hircus OX=9925 GN=SCCPDH PE=4 SV=1	SCCPDH	47.304	17	6	15	6	1.263	0.983	1.04	1.216	1.189	0.821	0.835	0.845	0.881	1.048	0.778	0.0051994
A0A452FNE1	Carboxy-terminal domain RNA polymerase II polypeptide A small phosphatase 1(predicted) OS=Capra hircus OX=9925 GN=CTDSP1 PE=4 SV=1	CTDSP1	29.219	4.2	1	1	1	1.815	0.694	0.454	1.691	0.506	0.169	2.945	1.235	0.539	0.381	1.021	0.6492
A0A452FNF0	RGM domain family member B(predicted) OS=Capra hircus OX=9925 GN=RGMB PE=4 SV=1	RGMB	51.507	5.4	3	4	3	1.04	1.061	0.891	0.994	1.189	1.177	1.006	0.996	1.034	1.043	1.016	0.75342
A0A452FNG0	binder of sperm protein homolog 1(predicted) OS=Capra hircus OX=9925 GN=BSPH1 PE=4 SV=1	BSPH1	13.641	56.8	8	22	8	0.816	1.094	0.556	0.951	1.3	1.338	1.102	0.716	1.249	1.038	1.154	0.40102
A0A452FNG4	Nuclear pore membrane glycoprotein 210-like protein(predicted) OS=Capra hircus OX=9925 GN=NUP210L PE=4 SV=1	NUP210L	207.24	1.7	3	3	3	1.708	0.802	1.743	1.819	0.938	0.602	0.586	0.731	0.706	0.774	0.485	0.02136
A0A452FNL7	MS4A13 protein(predicted) OS=Capra hircus OX=9925 PE=4 SV=1	---	96.691	7	6	7	6	1.461	1.011	1.325	1.493	1.18	0.582	0.747	0.919	0.826	0.705	0.584	0.00092361
A0A452FNN8	EFR3 homolog A(predicted) OS=Capra hircus OX=9925 GN=EFR3A PE=4 SV=1	EFR3A	90.931	13.2	9	14	9	1.126	0.937	1.083	1.155	1.068	0.995	0.994	0.979	0.984	1.06	0.934	0.125399
A0A452FNS1	Peptidyl-prolyl cis-trans isomerase(predicted) OS=Capra hircus OX=9925 GN=PPIA PE=4 SV=1	PPIA	17.869	43.3	8	11	8	0.916	0.804	0.774	0.983	0.788	2.371	0.837	1.027	0.997	0.886	1.434	0.22464
A0A452FNS4	BSD domain-containing protein 1(predicted) OS=Capra hircus OX=9925 GN=BSDC1 PE=4 SV=1	BSDC1	46.586	2.3	1	1	1	0.938	0.86	1.259	0.861	0.695	1.073	1.044	1.402	1.182	1.186	1.276	0.046157
A0A452FNS8	Beta-galactosidase(predicted) OS=Capra hircus OX=9925 GN=GLB1L3 PE=4 SV=1	GLB1L3	75.494	18.2	11	12	10	0.882	0.739	0.657	0.903	0.814	1.816	1.255	1.004	1.098	0.802	1.496	0.036116
A0A452FNT1	Furin(predicted) OS=Capra hircus OX=9925 GN=FURIN PE=4 SV=1	FURIN	87.025	29.2	18	29	18	0.785	0.817	0.73	0.814	0.912	2.123	1.408	0.946	0.945	0.804	1.534	0.112722
A0A452FNT7	ADP-dependent glucokinase(predicted) OS=Capra hircus OX=9925 GN=ADPGK PE=4 SV=1	ADPGK	53.973	16.1	7	10	7	1.134	1.319	1.05	1.058	1.174	0.754	0.895	1.349	0.915	0.731	0.81	0.081362
A0A452FNW0	Eukaryotic translation elongation factor 1 gamma(predicted) OS=Capra hircus OX=9925 GN=EEF1G PE=4 SV=1	EEF1G	50.375	37.5	19	40	19	1.981	0.591	0.565	2.586	0.663	1.119	0.57	0.534	0.764	0.521	0.549	0.26908
A0A452FNW6	Glyceraldehyde-3-phosphate dehydrogenase(predicted) OS=Capra hircus OX=9925 GN=GAPDH PE=4 SV=1	GAPDH	35.905	47.1	13	31	11	0.804	0.954	0.815	0.902	0.945	1.275	1.386	0.908	1.103	1.21	1.331	0.0088756
A0A452FNY3	Spermatogenesis-associated protein 19, mitochondrial(predicted) OS=Capra hircus OX=9925 GN=SPATA19 PE=4 SV=1	SPATA19	17.951	9.7	1	1	1
A0A452FNY6	TMEM8 protein(predicted) OS=Capra hircus OX=9925 GN=TMEM8A PE=4 SV=1	TMEM8A	79.45	1.7	1	1	1	1.253	1.166	1.083	1.151	1.341	1.098	0.753	0.681	0.904	0.979	0.737	0.0097419
A0A452FNZ8	E3 ubiquitin-protein ligase UBR4 isoform X5(predicted) OS=Capra hircus OX=9925 GN=UBR4 PE=4 SV=1	UBR4	571.37	7.8	37	45	37	0.949	0.767	0.752	1.043	0.756	1.291	1.477	0.955	1.202	1.146	1.423	0.0074392
A0A452FP02	phosphatidylinositol 5-phosphate 4-kinase type-2 alpha isoform X1(predicted) OS=Capra hircus OX=9925 GN=PIP4K2A PE=4 SV=1	PIP4K2A	44.663	4.3	1	1	1	1.04	1	1.164	1.009	1.183	0.87	0.828	0.981	1.062	1.289	0.932	0.37978
A0A452FP18	casein kinase II subunit alpha isoform X1(predicted) OS=Capra hircus OX=9925 GN=CSNK2A1 PE=4 SV=1	CSNK2A1	45.173	19.2	6	7	6	1.371	1.01	1.01	1.438	0.827	0.885	0.744	0.981	1.09	1.129	0.854	0.2838
A0A452FP27	Serine protease inhibitor Kazal-type 2(predicted) OS=Capra hircus OX=9925 PE=4 SV=1	---	9.1094	38.3	3	21	3	1.721	1.53	1.228	1.426	1.61	0.607	0.534	0.391	0.521	0.67	0.362	1.61899e-05
A0A452FP32	Putative malate dehydrogenase 1B (Fragment)(predicted) OS=Capra hircus OX=9925 GN=MDH1B PE=4 SV=1	MDH1B	50.553	2.9	1	1	1
A0A452FP48	GANAB protein (Fragment)(predicted) OS=Capra hircus OX=9925 GN=GANAB PE=4 SV=1	GANAB	106.39	36.9	34	48	34	0.859	1.053	1.269	0.854	1.031	0.902	1.052	1.278	1.038	1.017	1.044	0.6231
A0A452FP98	UV excision repair protein RAD23 homolog B-like isoform X1(predicted) OS=Capra hircus OX=9925 GN=RAD23B PE=4 SV=1	RAD23B	43.193	16.9	7	9	5	0.903	0.978	0.77	0.907	0.915	1.288	1.248	0.768	1.174	1.28	1.287	0.054782
A0A452FPB4	Tetratricopeptide repeat protein 19 (Fragment)(predicted) OS=Capra hircus OX=9925 GN=TTC19 PE=4 SV=1	TTC19	40.668	8.5	2	2	2	1.072	0.812	1.324	0.984	1.238	0.989	1.02	1.106	0.974	0.951	0.928	0.53506
A0A452FPD7	Protein phosphatase 1A(predicted) OS=Capra hircus OX=9925 GN=PPM1A PE=4 SV=1	PPM1A	42.529	31.7	10	15	8	1.065	0.925	0.895	0.921	1.069	1.169	1.176	0.941	1.062	1.061	1.11	0.101162
A0A452FPE4	Adhesion G protein-coupled receptor G6(predicted) OS=Capra hircus OX=9925 GN=ADGRG6 PE=4 SV=1	ADGRG6	125.99	5.7	5	5	5	1.077	1.075	0.901	1.001	1.464	1.051	1.037	0.966	1.002	0.764	0.874	0.23528
A0A452FPF6	FARSA protein(predicted) OS=Capra hircus OX=9925 GN=FARSA PE=4 SV=1	FARSA	56.522	6.4	3	4	3	1.565	0.762	0.777	2.171	0.972	1.027	0.843	0.709	0.853	0.728	0.666	0.20558
A0A452FPG8	peroxiredoxin-4(predicted) OS=Capra hircus OX=9925 GN=PRDX4 PE=4 SV=1	PRDX4	30.786	41.1	8	17	6	1.227	1.002	1.139	1.385	0.981	1.014	0.828	1.243	0.837	0.769	0.818	0.090758
A0A452FPH0	1-phosphatidylinositol 4,5-bisphosphate phosphodiesterase delta-4(predicted) OS=Capra hircus OX=9925 GN=PLCD4 PE=4 SV=1	PLCD4	87.543	7.2	5	7	5	0.905	0.886	1.097	0.976	0.912	1.051	1.279	1.087	1.061	1.097	1.167	0.0189026
A0A452FPI4	Notch2(predicted) OS=Capra hircus OX=9925 GN=NOTCH2 PE=4 SV=1	NOTCH2	256.14	2.2	4	4	4	1.116	0.923	1.337	1.021	1.051	0.956	0.682	1.234	0.999	0.88	0.872	0.23248
A0A452FPK7	Serum amyloid A protein(predicted) OS=Capra hircus OX=9925 GN=LOC102168699 PE=4 SV=1	LOC102168699	14.528	19.2	3	4	3	0.592	0.896	1.109	0.475	0.634	1.144	1.038	2.082	1.689	0.921	1.855	0.021642
A0A452FPN7	Glutathione peroxidase(predicted) OS=Capra hircus OX=9925 GN=GPX3 PE=4 SV=1	GPX3	25.954	31	6	15	4	0.852	0.888	0.982	0.863	0.888	0.953	0.889	1.1	1.307	1.431	1.27	0.075584
A0A452FPQ0	Multimerin-1(predicted) OS=Capra hircus OX=9925 GN=MMRN1 PE=4 SV=1	MMRN1	137.1	19.2	20	25	20	1.222	0.908	0.795	1.298	0.87	0.608	1.073	2.746	0.769	0.624	1.143	0.92306
A0A452FPS2	IgGFc-binding protein isoform X1(predicted) OS=Capra hircus OX=9925 GN=FCGBP PE=4 SV=1	FCGBP	274.57	4	10	11	10	0.864	1.591	1.088	0.896	1.413	0.726	0.722	1.073	1.007	0.919	0.76	0.116078
A0A452FPS4	tether containing UBX domain for GLUT4 isoform X3(predicted) OS=Capra hircus OX=9925 GN=ASPSCR1 PE=4 SV=1	ASPSCR1	60.085	2.9	1	1	1	1.17	0.92	0.889	1.314	1.242	0.802	0.944	0.891	1.205	1.022	0.879	0.26406
A0A452FPU3	Collagen type XIV alpha 1 chain(predicted) OS=Capra hircus OX=9925 GN=COL14A1 PE=4 SV=1	COL14A1	186.17	1.3	2	3	2	1.103	0.849	1.131	1.204	0.977	0.707	1.322	1.019	1.024	1.087	0.98	0.79266
A0A452FPW9	ADM(predicted) OS=Capra hircus OX=9925 GN=ADM PE=4 SV=1	ADM	21.244	37	7	14	7	0.613	0.771	0.742	0.508	0.598	0.78	1.132	1.632	1.42	2.227	2.225	0.0044633
A0A452FPX5	Proteasome activator complex subunit 4(predicted) OS=Capra hircus OX=9925 GN=PSME4 PE=4 SV=1	PSME4	206.52	17.4	27	45	27	0.814	0.839	0.8	0.825	0.818	1.441	1.269	1.033	1.157	1.188	1.486	0.0021389
A0A452FPX8	Hydroxyacyl-CoA dehydrogenase trifunctional multienzyme complex subunit alpha(predicted) OS=Capra hircus OX=9925 GN=HADHA PE=4 SV=1	HADHA	81.632	29.8	20	33	20	1.061	0.909	0.881	0.886	0.74	1.098	1.347	0.858	0.94	1.568	1.298	0.089355
A0A452FPX9	Dynein heavy chain 12, axonemal(predicted) OS=Capra hircus OX=9925 GN=DNAH12 PE=4 SV=1	DNAH12	349.59	1.5	5	5	3	1.822	0.995	1.525	1.95	1.08	0.619	0.61	0.7	0.624	0.542	0.42	0.0041572
A0A452FQ12	Anosmin-1 (Fragment)(predicted) OS=Capra hircus OX=9925 GN=ANOS1 PE=4 SV=1	ANOS1	69.645	5.2	2	2	2	0.844	0.67	1.086	0.88	0.542	1.057	0.897	1.634	1.285	1.603	1.61	0.021176
A0A452FQ17	Cathepsin S(predicted) OS=Capra hircus OX=9925 GN=CTSS PE=4 SV=1	CTSS	36.868	36.5	11	19	11	1.147	1.128	0.855	1.169	1.03	1.023	1.03	0.991	1.042	0.893	0.934	0.35472
A0A452FQ28	LFA-3(predicted) OS=Capra hircus OX=9925 GN=CD58 PE=4 SV=1	CD58	27.746	21.3	4	5	4	0.833	1.239	1.075	0.868	1.054	0.859	0.926	1.518	0.996	1.082	1.062	0.69702
A0A452FQ40	Glucosamine-6-phosphate isomerase(predicted) OS=Capra hircus OX=9925 GN=GNPDA2 PE=4 SV=1	GNPDA2	31.164	62	12	21	9	1.085	1.117	0.938	1.024	1.049	1.226	1.06	0.939	1.039	0.991	1.008	0.91812
A0A452FQ49	Semaphorin-4A(predicted) OS=Capra hircus OX=9925 GN=SEMA4A PE=4 SV=1	SEMA4A	83.549	12.6	9	12	9	0.909	1.011	1.063	0.886	1.136	0.86	1.161	1.239	1.242	0.905	1.08	0.47366
A0A452FQ51	ribosome-binding protein 1 isoform X1(predicted) OS=Capra hircus OX=9925 GN=RRBP1 PE=4 SV=1	RRBP1	155.51	2.6	4	4	4	0.911	1.041	0.877	0.882	0.88	0.834	0.808	2.362	0.852	1.192	1.317	0.42322
A0A452FQ55	Golgi membrane protein 1(predicted) OS=Capra hircus OX=9925 GN=GOLM1 PE=4 SV=1	GOLM1	45.621	35.6	13	29	13	0.851	1.348	0.961	0.912	1.46	0.839	1.09	1.361	0.9	0.791	0.9	0.51316
A0A452FQ64	Hydroxyacylglutathione hydrolase, mitochondrial(predicted) OS=Capra hircus OX=9925 GN=HAGH PE=4 SV=1	HAGH	33.966	46.4	14	32	14	1.268	1.114	0.97	1.319	1.054	1.145	0.874	0.794	0.75	0.903	0.78	0.025803
A0A452FQ88	Marapsin-like(predicted) OS=Capra hircus OX=9925 GN=PRSS27 PE=4 SV=1	PRSS27	35.552	19.5	5	6	5	0.977	0.981	1.255	1.049	0.918	0.838	1.121	1.294	1.11	0.913	1.019	0.8996
A0A452FQ92	LMNA isoform 6(predicted) OS=Capra hircus OX=9925 GN=LMNA PE=4 SV=1	LMNA	72.684	8.6	5	5	5	1.013	1.373	1.23	0.947	1.383	0.716	0.772	0.956	0.971	0.921	0.729	0.0139387
A0A452FQC0	Cathelicidin (Fragment)(predicted) OS=Capra hircus OX=9925 GN=LOC102169231 PE=4 SV=1	LOC102169231	17.606	34.8	4	5	3	1.212	1.015	1.036	2.25	1.055	0.568	0.721	0.818	0.804	0.858	0.574	0.015441
A0A452FQC6	PRPSAP2(predicted) OS=Capra hircus OX=9925 GN=PRPSAP2 PE=4 SV=1	PRPSAP2	40.757	11.7	4	5	2	0.969	1.197	0.893	1.145	1.15	0.731	1.122	1.113	1.049	1.156	0.966	0.69368
A0A452FQE3	Malic enzyme(predicted) OS=Capra hircus OX=9925 GN=ME1 PE=4 SV=1	ME1	64.044	37.3	19	38	19	1.011	0.94	0.782	1.006	0.93	1.376	1.209	0.887	0.964	1.156	1.198	0.097536
A0A452FQI7	Multidrug resistance-associated protein 9(predicted) OS=Capra hircus OX=9925 GN=ABCC12 PE=4 SV=1	ABCC12	146.4	0.8	1	1	1	1.191	0.779	0.85	1.278	0.933	1.111	1.224	1.064	1.054	0.953	1.075	0.42688
A0A452FQI9	Phosphopantothenoylcysteine synthetase(predicted) OS=Capra hircus OX=9925 GN=PPCS PE=4 SV=1	PPCS	34.23	12.3	4	5	4	0.883	1.29	0.785	0.973	1.192	0.982	1.195	0.863	1.169	1.062	1.029	0.73508
A0A452FQJ0	G protein-coupled receptor kinase(predicted) OS=Capra hircus OX=9925 GN=GRK2 PE=4 SV=1	GRK2	78.907	1.7	1	3	1	0.849	1.241	0.769	1.168	1.017	0.56	0.461	1.302	2.424	0.656	1.071	0.73224
A0A452FQK2	Aminopeptidase(predicted) OS=Capra hircus OX=9925 GN=NPEPPS PE=4 SV=1	NPEPPS	103.63	36.2	31	48	31	0.939	0.987	0.801	0.954	0.978	1.268	1.262	0.945	1.022	1.159	1.214	0.025976
A0A452FQK4	Abhydrolase domain-containing protein 14B(predicted) OS=Capra hircus OX=9925 GN=ABHD14B PE=4 SV=1	ABHD14B	22.483	5.2	1	1	1	0.971	1.183	1.097	1.055	1.142	1.051	0.918	0.99	1.041	1	0.918	0.077015
A0A452FQK5	Macrophage migration inhibitory factor(predicted) OS=Capra hircus OX=9925 GN=MIF PE=4 SV=1	MIF	12.343	39.1	4	10	4	1.185	1.049	1	1.067	1.192	1.169	0.899	0.775	0.916	1.033	0.872	0.100723
A0A452FQK7	TKFC(predicted) OS=Capra hircus OX=9925 GN=TKFC PE=4 SV=1	TKFC	59.088	56.1	24	64	24	0.739	0.932	0.747	0.802	0.853	1.512	1.074	1.075	1.033	1.485	1.517	0.0027815
A0A452FQK8	ArfGAP with SH3 domain, ankyrin repeat and PH domain 2(predicted) OS=Capra hircus OX=9925 GN=ASAP2 PE=4 SV=1	ASAP2	109.8	0.7	1	1	1	1.491	1.029	0.723	1.365	0.829	1.298	1.147	0.706	0.743	1.063	0.912	0.6658
A0A452FQM6	NADH dehydrogenase [ubiquinone] flavoprotein 1, mitochondrial(predicted) OS=Capra hircus OX=9925 GN=NDUFV1 PE=4 SV=1	NDUFV1	50.619	12.5	6	7	6	1.286	0.994	1.062	1.217	0.965	0.933	0.83	0.952	0.811	1.25	0.865	0.150761
A0A452FQM7	V-type proton ATPase subunit E 1 (Fragment)(predicted) OS=Capra hircus OX=9925 GN=ATP6V1E1 PE=4 SV=1	ATP6V1E1	26.125	31.4	7	17	2	0.908	1.107	1.012	0.835	0.987	1.158	1.151	1.247	1.085	0.987	1.161	0.041023
A0A452FQP6	Carboxylic ester hydrolase(predicted) OS=Capra hircus OX=9925 GN=CES5A PE=4 SV=1	CES5A	64.177	30	19	112	18	0.785	0.807	0.605	0.791	0.909	1.644	1.265	1.023	1.317	1.068	1.621	0.0021963
A0A452FQS4	Phosphodiesterase(predicted) OS=Capra hircus OX=9925 GN=PDE10A PE=4 SV=1	PDE10A	86.232	11.3	8	8	1	1.089	0.996	1.107	1.05	1.2	1.122	0.894	1.026	1.113	0.859	0.921	0.2106
A0A452FQU7	prostate and testis expressed protein 2-like(predicted) OS=Capra hircus OX=9925 PE=4 SV=1	---	14.663	32.5	6	9	6	1.578	0.772	0.863	1.606	0.88	1.351	0.698	0.788	0.802	0.993	0.813	0.3774
A0A452FQV0	Ran-specific GTPase-activating protein(predicted) OS=Capra hircus OX=9925 GN=RANBP1 PE=4 SV=1	RANBP1	23.652	4.4	1	3	1	1.661	0.659	0.705	2.05	0.921	1.709	0.71	0.887	0.673	0.499	0.747	0.39202
A0A452FQV1	T-complex protein 1 subunit eta(predicted) OS=Capra hircus OX=9925 GN=CCT7 PE=4 SV=1	CCT7	59.442	51.4	25	57	25	0.844	0.847	0.738	0.865	0.783	1.601	1.208	0.916	1.088	1.298	1.499	0.0161577
A0A452FQZ4	Sulfhydryl oxidase(predicted) OS=Capra hircus OX=9925 GN=QSOX1 PE=4 SV=1	QSOX1	66.114	57.6	31	72	31	0.734	1.323	1.418	0.714	1.069	0.736	0.98	1.54	0.96	0.955	0.983	0.97386
A0A452FR08	trafficking protein particle complex subunit 2-like protein isoform X2(predicted) OS=Capra hircus OX=9925 GN=TRAPPC2L PE=4 SV=1	TRAPPC2L	15.985	12.9	2	3	2	0.877	0.76	0.81	0.826	0.738	1.23	1.495	1.192	1.248	1.248	1.599	1.73748e-05
A0A452FR25	Transmembrane serine protease 12(predicted) OS=Capra hircus OX=9925 GN=TMPRSS12 PE=4 SV=1	TMPRSS12	37.853	8.2	3	5	3	0.88	0.741	0.861	0.819	0.808	1.316	1.333	1.07	1.133	1.349	1.509	8.3825e-05
A0A452FR34	YTH domain-containing family protein 2(predicted) OS=Capra hircus OX=9925 GN=YTHDF2 PE=4 SV=1	YTHDF2	62.449	2.1	1	3	1	0.849	0.955	1.214	0.807	0.997	0.744	0.937	1.445	1.52	1.025	1.176	0.3954
A0A452FR35	Ribosomal protein L19(predicted) OS=Capra hircus OX=9925 PE=4 SV=1	---	21.816	4.9	1	1	1	1.244	0.858	0.917	1.686	0.795	0.99	0.948	1.017	1.044	0.945	0.899	0.66236
A0A452FR38	Ribosomal protein L12(predicted) OS=Capra hircus OX=9925 GN=RPL12 PE=4 SV=1	RPL12	23.555	25.5	4	4	1
A0A452FR43	Insulin like growth factor binding protein 7(predicted) OS=Capra hircus OX=9925 GN=IGFBP7 PE=4 SV=1	IGFBP7	29.05	13.8	3	3	3	1.137	1.166	1.487	1.006	1.226	0.771	0.74	0.919	0.989	0.97	0.729	0.006979
A0A452FR85	Choline transporter-like protein 4(predicted) OS=Capra hircus OX=9925 GN=SLC44A4 PE=4 SV=1	SLC44A4	78.344	7.1	5	6	5	1.057	0.983	1.119	1.074	1.228	1.441	0.63	0.615	1.17	0.671	0.829	0.2394
A0A452FR97	Phosphoglycerate mutase(predicted) OS=Capra hircus OX=9925 GN=PGAM1 PE=4 SV=1	PGAM1	28.892	45.3	14	55	8	1.004	0.878	0.834	0.999	0.885	1.231	1.359	0.937	0.945	1.145	1.221	0.047756
A0A452FRB2	Tubulin alpha-8 chain(predicted) OS=Capra hircus OX=9925 GN=TUBA8 PE=4 SV=1	TUBA8	50.039	38.3	14	36	5	0.933	0.965	1.017	0.971	0.86	1.219	1.265	1.339	0.913	0.87	1.181	0.177105
A0A452FRC9	Heat shock 70 kDa protein 1-like protein(predicted) OS=Capra hircus OX=9925 GN=HSPA1L PE=4 SV=1	HSPA1L	70.732	50.5	36	100	21	0.901	0.821	0.686	0.869	0.885	1.498	1.354	0.927	1.01	1.345	1.474	0.0073621
A0A452FRE1	isoleucine--tRNA ligase, mitochondrial(predicted) OS=Capra hircus OX=9925 GN=IARS2 PE=4 SV=1	IARS2	113.7	14.7	13	16	13	1.334	1.27	0.976	1.081	1.03	0.872	0.826	0.737	0.972	1.17	0.804	0.054403
A0A452FRE6	ATP synthase subunit s, mitochondrial(predicted) OS=Capra hircus OX=9925 GN=DMAC2L PE=4 SV=1	DMAC2L	23.294	15	3	3	3	1.073	1.019	0.928	0.878	1.15	1.085	0.963	0.889	1.106	1.255	1.05	0.566
A0A452FRH5	Electron transfer flavoprotein-ubiquinone oxidoreductase, mitochondrial(predicted) OS=Capra hircus OX=9925 GN=ETFDH PE=4 SV=1	ETFDH	68.549	5.3	3	3	3	1.55	0.885	1.203	1.235	0.699	0.83	0.881	0.628	0.829	1.39	0.818	0.32662
A0A452FRH9	Inositol-3-phosphate synthase 1(predicted) OS=Capra hircus OX=9925 GN=ISYNA1 PE=4 SV=1	ISYNA1	60.714	45.4	27	66	27	1.053	0.913	0.774	1.11	0.961	1.368	1.052	0.932	0.935	1.074	1.114	0.29224
A0A452FRL2	Epithelial cell adhesion molecule(predicted) OS=Capra hircus OX=9925 GN=EPCAM PE=4 SV=1	EPCAM	33.722	12.2	3	3	3	0.958	1.254	1.229	0.918	1.114	0.737	0.925	1.156	1.216	0.963	0.913	0.39422
A0A452FRM2	Methylosome protein 50(predicted) OS=Capra hircus OX=9925 GN=WDR77 PE=4 SV=1	WDR77	36.81	7.9	2	3	2	0.736	0.817	0.964	0.942	0.797	1.067	1.314	0.985	1.055	1.295	1.343	0.0054383
A0A452FRM3	tRNA-dihydrouridine synthase 2-like protein(predicted) OS=Capra hircus OX=9925 GN=DUS2 PE=4 SV=1	DUS2	51.417	3.5	1	1	1	0.814	1.242	0.805	0.899	1.169	1.331	0.834	1.032	1.571	0.747	1.119	0.6018
A0A452FRM6	ATPase ASNA1(predicted) OS=Capra hircus OX=9925 GN=ASNA1 PE=4 SV=1	ASNA1	38.808	8	3	5	3	0.785	1.004	0.665	0.966	0.869	1.431	1.249	1.153	1.022	1.288	1.432	0.004584
A0A452FRM7	Ribonuclease A K1(predicted) OS=Capra hircus OX=9925 PE=4 SV=1	---	25.311	56.9	19	242	19	0.902	1.16	1.311	0.886	1.028	0.636	0.884	1.436	1.031	0.993	0.942	0.59922
A0A452FRN6	Glutamine--tRNA ligase(predicted) OS=Capra hircus OX=9925 GN=QARS PE=4 SV=1	QARS	86.023	3.3	2	2	2	1.165	0.965	1.046	1.64	0.907	0.83	0.883	1.164	0.899	0.974	0.83	0.192956
A0A452FRQ7	Chromosome 3 C1orf123 homolog(predicted) OS=Capra hircus OX=9925 GN=C1orf123 PE=4 SV=1	C1orf123	16.63	33.3	4	5	4	1.182	0.838	0.773	1.359	0.86	1.183	0.905	0.935	0.865	0.966	0.968	0.9147
A0A452FRV2	BolA family member 1 OS=Capra hircus OX=9925 GN=BOLA1 PE=4 SV=1	BOLA1	14.093	6.8	1	1	1	0.907	0.92	0.78	0.845	0.896	1.476	0.967	1.038	1.025	1.558	1.395	0.040664
A0A452FRX3	low-density lipoprotein receptor-related protein 8 isoform X2(predicted) OS=Capra hircus OX=9925 GN=LRP8 PE=4 SV=1	LRP8	100.24	13.6	12	18	12	0.8	0.942	1.373	0.721	0.808	0.607	1.181	1.719	1.529	0.793	1.255	0.44622
A0A452FRY3	Splicing factor, proline-and glutamine-rich (Fragment)(predicted) OS=Capra hircus OX=9925 GN=SFPQ PE=4 SV=1	SFPQ	72.852	3.3	1	3	1		1.108	1.221	0.942	1.065	0.919			0.998	0.876	0.859	0.089644
A0A452FRY8	Acrosin OS=Capra hircus OX=9925 GN=ACR PE=4 SV=1	ACR	44.878	48.6	18	102	18	1.625	1.383	1.484	1.381	1.493	0.421	0.563	0.557	0.558	0.643	0.372	5.2139e-07
A0A452FRZ0	STAB1(predicted) OS=Capra hircus OX=9925 PE=4 SV=1	---	75.874	16.4	8	10	8	1.021	0.977	0.861	0.957	1.153	1.473	0.973	1.029	1.039	0.963	1.102	0.36378
A0A452FS07	Cell cycle control protein 50A (Fragment)(predicted) OS=Capra hircus OX=9925 GN=TMEM30A PE=4 SV=1	TMEM30A	40.766	31	10	13	10	1.161	1.007	1.02	1.044	1.14	0.924	1.087	0.834	0.913	1.132	0.91	0.163155
A0A452FS09	ATP-dependent Clp protease proteolytic subunit(predicted) OS=Capra hircus OX=9925 GN=CLPP PE=4 SV=1	CLPP	29.693	7	2	2	2	1.05	1.027	0.979	0.937	0.853	0.978	1.06	0.948	0.983	1.582	1.145	0.27836
A0A452FS56	Tyrosine 3-monooxygenase/tryptophan 5-monooxygenase activation protein theta(predicted) OS=Capra hircus OX=9925 PE=4 SV=1	---	27.215	26.7	8	25	4	1.352	0.886	0.806	1.784	0.955	1.534	0.921	0.689	0.871	0.629	0.803	0.32508
A0A452FS72	Putative multifunctional chaperone 14-3-3 family (Fragment)(predicted) OS=Capra hircus OX=9925 GN=YWHAE PE=4 SV=1	YWHAE	27.623	66.3	16	48	14	1.22	1.136	0.858	1.274	1.142	1.171	1.026	0.76	0.936	0.899	0.851	0.141557
A0A452FS73	Signal peptide, CUB domain and EGF like domain containing 3(predicted) OS=Capra hircus OX=9925 GN=SCUBE3 PE=4 SV=1	SCUBE3	102.67	10	7	7	4	0.825	1.145	1.415	0.852	1.084	0.813	1.161	1.216	1.297	0.687	0.972	0.81976
A0A452FSB2	Unconventional myosin-Ic(predicted) OS=Capra hircus OX=9925 GN=MYO1C PE=4 SV=1	MYO1C	119.85	1.6	2	2	2	0.988	0.908	0.934	0.971	1.213	1.157	0.94	0.994	1.287	1.03	1.079	0.35602
A0A452FSD2	Proteasome subunit beta type-6(predicted) OS=Capra hircus OX=9925 GN=PSMB6 PE=4 SV=1	PSMB6	25.572	34.3	8	19	8	1.103	0.991	0.91	1.126	0.996	1.152	1.048	0.944	0.963	1.079	1.012	0.82898
A0A452FSD4	RPS15(predicted) OS=Capra hircus OX=9925 GN=RPS15 PE=4 SV=1	RPS15	16.895	17.4	2	3	2	1.302	0.934	0.964	1.684	0.817	1.168	0.963	1.054	0.89	0.703	0.838	0.35032
A0A452FSE1	40S ribosomal protein S13(predicted) OS=Capra hircus OX=9925 GN=RPS13 PE=4 SV=1	RPS13	17.222	15.9	2	2	2	1.416	0.693	0.83	1.826	0.774	1.047	1.263	0.941	0.976	0.668	0.884	0.7538
A0A452FSF2	Deoxyhypusine hydroxylase(predicted) OS=Capra hircus OX=9925 GN=DOHH PE=4 SV=1	DOHH	33.439	9.9	2	2	2	0.78	0.772	0.822	0.839	0.849	1.731	1.139	1.158	1.265	1.094	1.572	0.0067816
A0A452FSG2	Alpha 1,4-galactosyltransferase(predicted) OS=Capra hircus OX=9925 GN=A4GALT PE=4 SV=1	A4GALT	40.246	28.4	8	15	8	0.908	0.983	1.23	0.975	0.902	0.832	1.066	1.283	1.125	0.965	1.055	0.60716
A0A452FSH2	C-Jun-amino-terminal kinase-interacting protein 4 isoform X1(predicted) OS=Capra hircus OX=9925 GN=SPAG9 PE=4 SV=1	SPAG9	147.64	3.1	4	4	4	1.135	1.06	0.788	1.126	0.943	1.109	1.217	0.874	0.961	1.184	1.058	0.5544
A0A452FSH3	F-actin-capping protein subunit alpha-1(predicted) OS=Capra hircus OX=9925 GN=CAPZA1 PE=4 SV=1	CAPZA1	33.232	16	3	4	2	1.149	0.948	0.793	1.113	1.06	1.072	1.083	0.894	1.152	1.01	1.029	0.68182
A0A452FSH7	cAMP-dependent protein kinase type II-alpha regulatory subunit(predicted) OS=Capra hircus OX=9925 GN=PRKAR2A PE=4 SV=1	PRKAR2A	45.144	54.4	21	43	21	1.081	1.047	0.753	0.984	1.133	1.374	1.09	0.865	0.865	1.052	1.05	0.71056
A0A452FSI7	Sperm acrosomal protein FSA-ACR.1(predicted) OS=Capra hircus OX=9925 GN=ACRV1 PE=4 SV=1	ACRV1	27.464	15.8	9	147	9	1.994	1.229	1.684	1.848	1.414	0.34	0.345	0.386	0.359	0.349	0.218	7.9105e-05
A0A452FSK9	ATP-citrate synthase(predicted) OS=Capra hircus OX=9925 GN=ACLY PE=4 SV=1	ACLY	120.9	34.7	35	57	35	0.867	0.823	0.775	0.87	0.724	1.305	1.728	0.876	1.104	1.151	1.519	0.027642
A0A452FSP4	Kinesin-like protein(predicted) OS=Capra hircus OX=9925 GN=KIF9 PE=4 SV=1	KIF9	89.318	3.8	3	3	3	1.669	0.958	0.996	1.186	1.186	0.645	1.163	0.96	1.089	0.587	0.741	0.100142
A0A452FSR3	voltage-dependent calcium channel subunit alpha-2/delta-1(predicted) OS=Capra hircus OX=9925 GN=CACNA2D1 PE=4 SV=1	CACNA2D1	121.83	7.7	7	7	7	1.13	1.239	0.979	1.193	1.272	0.817	0.874	0.762	0.944	0.938	0.746	0.00149784
A0A452FSS8	Lipase member I (Fragment)(predicted) OS=Capra hircus OX=9925 GN=LIPI PE=4 SV=1	LIPI	51.917	23.3	9	15	9	0.97	0.634	0.659	1.114	0.791	2.655	0.798	1.256	0.856	0.688	1.5	0.29874
A0A452FSS9	Secernin-1 (Fragment)(predicted) OS=Capra hircus OX=9925 GN=SCRN1 PE=4 SV=1	SCRN1	46.275	4.1	1	1	1
A0A452FSW6	Family with sequence similarity 62 (C2 domain containing), member A(predicted) OS=Capra hircus OX=9925 GN=ESYT1 PE=4 SV=1	ESYT1	120.09	2.3	2	2	2	1.245	1.076	1.259	1.722	1.126	0.752	0.839	0.828	0.898	0.704	0.626	0.00112499
A0A452FSW8	Glomulin(predicted) OS=Capra hircus OX=9925 GN=GLMN PE=4 SV=1	GLMN	65.577	16	9	14	9	0.813	0.904	0.817	0.854	0.774	1.483	1.205	1.145	1.087	1.314	1.498	0.000176068
A0A452FSZ2	DnaJ homolog subfamily C member 3(predicted) OS=Capra hircus OX=9925 GN=DNAJC3 PE=4 SV=1	DNAJC3	57.773	33.3	22	38	22	0.87	1.132	1.283	0.907	0.988	0.732	0.956	1.424	1.268	0.921	1.023	0.9695
A0A452FT17	NADH dehydrogenase [ubiquinone] 1 alpha subcomplex subunit 8(predicted) OS=Capra hircus OX=9925 GN=NDUFA8 PE=4 SV=1	NDUFA8	20.086	18.6	2	3	2	2.203	1.122	1.582	1.834	1.039	0.558	0.387	0.884	0.741	0.734	0.425	0.0029781
A0A452FT36	SRSF protein kinase 2(predicted) OS=Capra hircus OX=9925 GN=SRPK2 PE=4 SV=1	SRPK2	77.042	9.5	5	5	5	1.03	0.898	0.807	1.114	0.705	0.959	1.205	1.108	1.217	1.251	1.26	0.035815
A0A452FT44	spermatogenesis-associated protein 13 isoform X2(predicted) OS=Capra hircus OX=9925 GN=SPATA13 PE=4 SV=1	SPATA13	131.91	1.4	1	1	1	1.102	0.954	0.821	0.853	0.986	1.082	1.634	0.878	1.041	1.039	1.203	0.186303
A0A452FT53	Twinfilin-1(predicted) OS=Capra hircus OX=9925 GN=TWF1 PE=4 SV=1	TWF1	39.931	4.6	1	1	1
A0A452FT60	DnaJ homolog subfamily B member 1(predicted) OS=Capra hircus OX=9925 GN=DNAJB1 PE=4 SV=1	DNAJB1	38.217	17.6	5	5	5	1.228	1.011	0.762	1.073	1.219	1.236	0.944	0.843	1.131	0.959	0.966	0.79538
A0A452FT76	probable E3 ubiquitin-protein ligase MARCH10(predicted) OS=Capra hircus OX=9925 GN=MARCH10 PE=4 SV=1	MARCH10	26.337	4.2	1	1	1	1.307	1.326	1.33	1.147	1.851	0.723	0.477	0.581	0.862	0.808	0.496	0.00076307
A0A452FTB3	UDP-glucuronate decarboxylase 1(predicted) OS=Capra hircus OX=9925 GN=UXS1 PE=4 SV=1	UXS1	46.176	9.5	3	5	3	0.824	0.915	1.176	0.708	0.834	0.784	1.294	1.597	1.304	1.163	1.378	0.0645
A0A452FTB6	DnaJ homolog subfamily A member 2(predicted) OS=Capra hircus OX=9925 GN=DNAJA2 PE=4 SV=1	DNAJA2	39.843	10.1	4	5	4	0.913	0.896	0.925	0.923	0.864	1.245	1.164	1.294	1.024	1.22	1.315	0.0030444
A0A452FTD0	Immunoglobulin lambda variable 3-10(predicted) OS=Capra hircus OX=9925 PE=4 SV=1	---	18.763	27.5	5	7	5	0.889	1.64	1.469	0.932	1.437	0.642	0.824	0.953	0.715	0.771	0.613	0.0114638
A0A452FTH7	complement C4-A(predicted) OS=Capra hircus OX=9925 GN=LOC102170693 PE=4 SV=1	LOC102170693	172.4	18.3	26	13	1
A0A452FTI3	Intercellular adhesion molecule 5 (Fragment)(predicted) OS=Capra hircus OX=9925 GN=LOC102172482 PE=4 SV=1	LOC102172482	64.505	3.7	1	1	1	1.32	0.971	1.454	1.241	1.171	0.627	1.043	1.028	0.921	0.7	0.701	0.0180359
A0A452FTJ0	Calreticulin(predicted) OS=Capra hircus OX=9925 GN=CALR PE=4 SV=1	CALR	48.025	56.4	21	58	21	1.175	0.926	0.784	1.25	0.907	1.095	0.987	1.115	1.023	0.902	1.016	0.77572
A0A452FTL3	Hyaluronidase(predicted) OS=Capra hircus OX=9925 GN=HYAL1 PE=4 SV=1	HYAL1	50.397	3.8	2	2	2	1.245	0.88	1.057	1.252	0.943	1.009	0.825	1.131	1.171	0.95	0.946	0.59076
A0A452FTL9	Vesicle-associated membrane protein-associated protein B(predicted) OS=Capra hircus OX=9925 GN=VAPB PE=4 SV=1	VAPB	27.156	26.3	6	8	5	1.511	1.344	1.322	1.401	1.299	0.793	0.626	0.644	0.773	0.781	0.526	1.9092e-06
A0A452FTM7	SH3 domain binding glutamate rich protein like 3(predicted) OS=Capra hircus OX=9925 GN=SH3BGRL3 PE=4 SV=1	SH3BGRL3	10.438	18.3	2	2	2	0.897	0.968	1.127	0.929	1.105	1.208	0.978	0.983	1.213	1.029	1.077	0.30504
A0A452FTP4	FAF1 isoform 4(predicted) OS=Capra hircus OX=9925 GN=FAF1 PE=4 SV=1	FAF1	71.307	17.2	8	8	8	0.98	0.951	1.029	0.943	0.854	0.884	1.245	1.241	1.173	1.24	1.216	0.031896
A0A452FTP7	glutathione S-transferase theta-4(predicted) OS=Capra hircus OX=9925 GN=GSTT4 PE=4 SV=1	GSTT4	27.898	25.3	6	6	6	0.95	0.884	0.976	0.964	0.857	1.024	1.297	1.09	1.188	1.103	1.231	0.0026437
A0A452FTQ1	Alpha-soluble NSF attachment protein(predicted) OS=Capra hircus OX=9925 GN=NAPA PE=4 SV=1	NAPA	33.204	27.5	5	6	5	1.04	0.942	1.26	1.061	1.204	0.95	0.875	1.123	0.985	0.976	0.891	0.126523
A0A452FTQ5	histone H2A.V(predicted) OS=Capra hircus OX=9925 GN=H2AFV PE=4 SV=1	H2AFV	13.377	12.6	2	2	2	0.876	1.405	1.176	1.16	1.131	0.915	0.849	1.056	0.912	0.991	0.822	0.056564
A0A452FTR7	Sonic hedgehog(predicted) OS=Capra hircus OX=9925 GN=SHH PE=4 SV=1	SHH	47.319	4.4	2	2	1
A0A452FTS0	complement C4-A(predicted) OS=Capra hircus OX=9925 GN=LOC102170693 PE=4 SV=1	LOC102170693	181.32	16.5	26	12	1	1.351	0.823	1.819	1.646	0.788	0.627	0.937	0.876	0.937	0.678	0.631	0.063777
A0A452FTS2	Riboflavin kinase(predicted) OS=Capra hircus OX=9925 GN=RFK PE=4 SV=1	RFK	17.665	10.3	3	4	3	0.675	0.582	0.382	0.647	0.609	2.066	1.675	0.989	1.236	1.445	2.56	0.0004436
A0A452FTS7	Inner centromere protein(predicted) OS=Capra hircus OX=9925 GN=INCENP PE=4 SV=1	INCENP	91.813	1.6	1	2	1	0.757	1.183	0.634	0.669	1.243	0.203	0.257	2.276	0.268	3.027	1.344	0.6275
A0A452FTV0	Annexin(predicted) OS=Capra hircus OX=9925 PE=4 SV=1	---	48.243	12	4	4	4	1.153	0.913	0.938	1.251	1.231	1.116	0.93	0.939	1.086	0.873	0.901	0.26166
A0A452FTX7	Transmembrane protein 89(predicted) OS=Capra hircus OX=9925 GN=TMEM89 PE=4 SV=1	TMEM89	18.067	13.8	2	2	2	1.701	0.885	2.569	1.617	0.773	0.432	0.537	0.63	0.753	0.609	0.392	0.0074418
A0A452FTZ7	AP-1 complex subunit gamma(predicted) OS=Capra hircus OX=9925 GN=AP1G2 PE=4 SV=1	AP1G2	86.879	2.3	2	4	1	0.939	0.947	1.092	1.085	0.914	0.897	1.258	1.252	0.869	1.213	1.103	0.37116
A0A452FTZ9	Alpha isoform of regulatory subunit A, protein phosphatase 2(predicted) OS=Capra hircus OX=9925 GN=PPP2R1A PE=4 SV=1	PPP2R1A	65.281	34.3	18	30	18	0.829	0.933	0.909	0.867	0.984	1.292	1.204	1.086	1.107	1.212	1.305	0.00028163
A0A452FU26	3-hydroxyisobutyryl-CoA hydrolase, mitochondrial(predicted) OS=Capra hircus OX=9925 GN=HIBCH PE=4 SV=1	HIBCH	42.617	2.9	1	1	1	1.06	1.052	0.898	0.923	1.114	1.039	1.021	0.869	1.024	1.388	1.058	0.59366
A0A452FU41	Complement component 1, r subcomponent(predicted) OS=Capra hircus OX=9925 GN=C1R PE=4 SV=1	C1R	80.286	1.1	1	1	1
A0A452FUA1	Nucleoside diphosphate kinase(predicted) OS=Capra hircus OX=9925 GN=NME4 PE=4 SV=1	NME4	20.513	11.8	2	4	2	1.384	0.939	1.084	1.086	0.875	0.969	0.908	0.918	0.908	1.227	0.918	0.43898
A0A452FUH0	N-acetyllactosaminide alpha-1,3-galactosyltransferase(predicted) OS=Capra hircus OX=9925 GN=LOC102168270 PE=4 SV=1	LOC102168270	43.411	18.2	6	7	6	0.928	1.257	1.169	0.92	1.181	0.773	0.897	1.206	1.145	0.931	0.908	0.36098
A0A452FUI0	Dynactin subunit 4(predicted) OS=Capra hircus OX=9925 GN=DCTN4 PE=4 SV=1	DCTN4	53.207	18	7	9	7	1.014	1.089	0.931	1.039	1.008	0.745	1.351	1.042	1.09	1.197	1.068	0.66564
A0A452FUI2	KRT18 protein (Fragment)(predicted) OS=Capra hircus OX=9925 GN=KRT18 PE=4 SV=1	KRT18	47.359	10.4	5	6	3	0.873	1.116	1.277	0.883	0.794	1.105	1.121	1.364	1.026	0.714	1.078	0.62518
A0A452FUI6	Coactosin-like protein(predicted) OS=Capra hircus OX=9925 GN=COTL1 PE=4 SV=1	COTL1	16.01	68.3	8	14	8	0.579	0.871	0.555	0.665	1.151	1.849	1.122	1.062	1.031	1.561	1.734	0.0143365
A0A452FUJ2	MHC class I-related protein(predicted) OS=Capra hircus OX=9925 PE=4 SV=1	---	32.177	20.2	6	11	1
A0A452FUJ8	Fibroleukin(predicted) OS=Capra hircus OX=9925 GN=FGL2 PE=4 SV=1	FGL2	50.651	19.7	5	5	5	0.787	0.875	0.826	0.822	0.933	1.442	1.07	1.043	1.519	1.158	1.469	0.00196476
A0A452FUJ9	Heat shock protein family A (Hsp70) member 4 like(predicted) OS=Capra hircus OX=9925 GN=HSPA4L PE=4 SV=1	HSPA4L	115.47	45	45	82	41	1.327	0.77	0.709	1.595	0.84	1.481	0.893	0.882	0.896	0.731	0.932	0.8161
A0A452FUL7	T-complex protein 1 subunit zeta-2(predicted) OS=Capra hircus OX=9925 GN=CCT6B PE=4 SV=1	CCT6B	58.033	40.7	22	42	12	0.771	0.842	0.634	0.814	0.809	1.697	1.069	0.825	1.068	1.45	1.579	0.013795
A0A452FUP0	Enolase-phosphatase E1(predicted) OS=Capra hircus OX=9925 GN=ENOPH1 PE=4 SV=1	ENOPH1	28.911	49.4	9	11	9	0.866	1.037	0.86	0.988	1.021	1.444	0.972	0.921	1.039	1.166	1.161	0.157384
A0A452FUQ8	Chemokine like factor OS=Capra hircus OX=9925 GN=CKLF PE=4 SV=1	CKLF	16.493	12.1	2	2	2
A0A452FUS0	Serine/threonine-protein phosphatase(predicted) OS=Capra hircus OX=9925 GN=PPP2CA PE=4 SV=1	PPP2CA	35.594	39.5	12	21	2	0.847	0.826	0.625	0.934	0.851	1.4	1.384	1.141	1.078	1.215	1.523	0.00110206
A0A452FUS9	Peroxisomal NADH pyrophosphatase NUDT12(predicted) OS=Capra hircus OX=9925 GN=NUDT12 PE=4 SV=1	NUDT12	52.133	13	6	6	6	1.153	1.176	0.832	1.166	1.121	1.076	0.961	0.869	1.047	0.962	0.902	0.23418
A0A452FUT7	Neutral and basic amino acid transport protein rBAT(predicted) OS=Capra hircus OX=9925 GN=SLC3A1 PE=4 SV=1	SLC3A1	78.636	1.5	1	1	1
A0A452FUU4	Carnitine O-palmitoyltransferase 1 muscle isoform(predicted) OS=Capra hircus OX=9925 GN=CPT1B PE=4 SV=1	CPT1B	76.245	1.5	1	1	1	3	0.599	1.21	2.453	0.833	0.553	0.625	0.357	0.415	0.368	0.286	0.0103578
A0A452FUU6	Proteasome activator complex subunit 2(predicted) OS=Capra hircus OX=9925 GN=PSME2 PE=4 SV=1	PSME2	26.71	12.8	3	4	3	1.112	1.302	1.02	1.08	1.402	1.081	0.887	0.62	0.94	0.949	0.757	0.032117
A0A452FUX3	Armadillo repeat-containing protein 3 (Fragment)(predicted) OS=Capra hircus OX=9925 GN=ARMC3 PE=4 SV=1	ARMC3	95.652	13.7	9	10	9	1.305	1.172	1.174	1.124	1.208	0.836	0.752	0.919	0.841	0.904	0.711	4.3723e-05
A0A452FUX9	ANGPTL4(predicted) OS=Capra hircus OX=9925 GN=ANGPTL4 PE=4 SV=1	ANGPTL4	44.33	5.8	2	2	2	0.798	0.846	1.146	0.732	0.832	0.627	0.968	1.658	1.638	1.254	1.411	0.172479
A0A452FUZ1	DnaJ homolog subfamily C member 5B(predicted) OS=Capra hircus OX=9925 GN=DNAJC5B PE=4 SV=1	DNAJC5B	22.671	7.5	1	4	1	0.919	1.341	0.788	0.774	0.921	1.235	1.185	0.824	1.001	1.52	1.215	0.20934
A0A452FV50	trafficking protein particle complex subunit 13 isoform X2(predicted) OS=Capra hircus OX=9925 GN=TRAPPC13 PE=4 SV=1	TRAPPC13	46.015	2.2	1	1	1	0.562	0.585	0.513	0.733	0.632	1.257	2.06	0.957	1.449	1.577	2.413	0.00028246
A0A452FV58	Guanylate-binding protein 6(predicted) OS=Capra hircus OX=9925 GN=LOC102174832 PE=4 SV=1	LOC102174832	71.274	1.9	1	1	1
A0A452FV72	MIS18 binding protein 1(predicted) OS=Capra hircus OX=9925 GN=MIS18BP1 PE=4 SV=1	MIS18BP1	118.78	0.7	1	1	1
A0A452FVB0	Actin-related protein 2/3 complex subunit 3(predicted) OS=Capra hircus OX=9925 GN=ARPC3 PE=4 SV=1	ARPC3	22.163	13.4	2	2	2	0.922	0.883	0.883	0.969	0.951	1.37	1.248	0.978	1.133	1.082	1.261	0.0060554
A0A452FVB8	Leucine zipper transcription factor-like protein 1(predicted) OS=Capra hircus OX=9925 GN=LZTFL1 PE=4 SV=1	LZTFL1	34.577	18.4	5	5	5	1.182	0.777	1.189	1.265	0.847	1.981	0.811	1.003	0.797	0.657	0.998	0.76984
A0A452FVB9	Common salivary protein BSP30 form C(predicted) OS=Capra hircus OX=9925 PE=4 SV=1	---	27.335	4.5	2	3	2	0.599	1.129	2.656	0.584	1.12	0.781	0.587	1.162	1.342	0.614	0.737	0.55888
A0A452FVD3	Rac family small GTPase 1 OS=Capra hircus OX=9925 GN=RAC1 PE=4 SV=1	RAC1	21.068	36.4	6	9	3	0.827	1.083	0.934	1.001	1.027	1.293	0.989	1.119	1.155	1.028	1.146	0.073341
A0A452FVE8	IARS protein(predicted) OS=Capra hircus OX=9925 GN=IARS PE=4 SV=1	IARS	143.8	2.1	3	3	3	1.52	0.808	0.92	2.087	0.831	0.922	0.746	1.015	0.81	0.804	0.697	0.21146
A0A452FVF4	AMZ2(predicted) OS=Capra hircus OX=9925 GN=AMZ2 PE=4 SV=1	AMZ2	41.336	4.4	2	2	2	1.031	0.898	1.265	0.867	1.084	0.907	1.14	0.913	1.176	1.134	1.024	0.77108
A0A452FVJ0	V-type proton ATPase subunit a(predicted) OS=Capra hircus OX=9925 GN=ATP6V0A1 PE=4 SV=1	ATP6V0A1	96.315	6.2	5	6	5	1.003	1.053	1.286	0.959	1.17	0.891	1.014	1.02	1.011	1.036	0.909	0.166081
A0A452FVJ2	Polyadenylate-binding protein(predicted) OS=Capra hircus OX=9925 GN=PABPC1 PE=4 SV=1	PABPC1	69.955	5.1	3	3	3	1.174	0.918	1.051	1.284	0.891	1.287	0.745	1.309	0.897	0.956	0.977	0.781
A0A452FVM4	Tryptophan--tRNA ligase, cytoplasmic(predicted) OS=Capra hircus OX=9925 GN=WARS PE=4 SV=1	WARS	54.316	18	7	12	7	1.162	0.651	0.704	1.297	1.267	1.192	1.177	0.79	0.764	1.045	0.978	0.99038
A0A452FVN4	ectonucleoside triphosphate diphosphohydrolase 3(predicted) OS=Capra hircus OX=9925 GN=ENTPD3 PE=4 SV=1	ENTPD3	59.575	8.5	3	4	3	0.952	1.194	1.085	0.944	1.296	1.042	0.803	1.086	1.034	0.869	0.884	0.189159
A0A452FVN5	Ribosomal protein L31(predicted) OS=Capra hircus OX=9925 GN=RPL31 PE=4 SV=1	RPL31	14.463	20	2	2	2	0.957	0.89	1.062	1.785	0.822	0.851	0.816	1.418	1.005	0.909	0.906	0.6582
A0A452FVN8	Brefeldin A-inhibited guanine nucleotide-exchange protein 2(predicted) OS=Capra hircus OX=9925 GN=ARFGEF2 PE=4 SV=1	ARFGEF2	202.16	8.4	15	17	8	0.7	0.677	0.733	0.786	0.622	1.25	2.077	1.146	1.04	1.225	1.915	0.00118395
A0A452FVR1	Acyl-coenzyme A thioesterase 9, mitochondrial(predicted) OS=Capra hircus OX=9925 GN=ACOT9 PE=4 SV=1	ACOT9	49.857	18.3	6	10	6	1.718	0.879	0.998	1.275	0.835	0.717	0.967	0.767	0.833	1.24	0.793	0.23076
A0A452FVS1	Adenylate kinase 2, mitochondrial(predicted) OS=Capra hircus OX=9925 GN=AK2 PE=4 SV=1	AK2	26.441	42.7	9	15	9	1.185	1.249	0.932	1.026	1.314	0.974	0.885	0.847	0.95	0.978	0.812	0.020302
A0A452FVT0	WFDC2(predicted) OS=Capra hircus OX=9925 GN=WFDC2 PE=4 SV=1	WFDC2	12.75	62.6	14	86	14	0.926	1.422	1.251	0.956	1.283	1.375	0.52	0.91	0.92	0.737	0.764	0.129679
A0A452FVT7	E3 ubiquitin-protein ligase(predicted) OS=Capra hircus OX=9925 GN=WWP2 PE=4 SV=1	WWP2	94.576	5.9	5	5	4	0.789	0.718	0.646	0.749	0.612	1.578	1.587	1.093	1.251	1.508	1.997	5.5462e-05
A0A452FVT9	TNFRSF6B protein(predicted) OS=Capra hircus OX=9925 GN=TNFRSF6B PE=4 SV=1	TNFRSF6B	32.424	14.9	3	5	3	1.352	0.876	1.302	1.457	1.046	0.873	0.87	1.022	0.921	0.744	0.734	0.023943
A0A452FVU6	CD164 molecule like 2(predicted) OS=Capra hircus OX=9925 GN=CD164L2 PE=4 SV=1	CD164L2	18.487	9.8	1	1	1	1.756	0.764	1.094	1.901	0.757	0.827	0.63	0.92	0.918	0.883	0.666	0.144437
A0A452FVY3	Carboxypeptidase(predicted) OS=Capra hircus OX=9925 GN=SCPEP1 PE=4 SV=1	SCPEP1	51.787	7.2	3	3	3	0.835	1.118	1.23	0.8	1.008	0.885	1.109	1.175	1.124	1.176	1.096	0.33928
A0A452FVY9	Mucin 15, cell surface associated(predicted) OS=Capra hircus OX=9925 GN=MUC15 PE=4 SV=1	MUC15	35.882	3	1	2	1	0.756	1.053	0.519	0.788	1.54	1.488	1.471	0.78	0.942	1.032	1.227	0.31116
A0A452FVZ1	Putative threonine protease PRSS50(predicted) OS=Capra hircus OX=9925 GN=PRSS50 PE=4 SV=1	PRSS50	37.297	22	6	12	6	1.413	1.176	1.287	1.419	1.525	0.779	0.744	0.684	0.853	0.774	0.562	4.2819e-06
A0A452FVZ9	Isopentenyl-diphosphate Delta-isomerase 1(predicted) OS=Capra hircus OX=9925 GN=IDI1 PE=4 SV=1	IDI1	32.537	3.8	1	1	1
A0A452FW06	PDZ domain-containing protein 9(predicted) OS=Capra hircus OX=9925 GN=PDZD9 PE=4 SV=1	PDZD9	29.866	8	3	3	3	1.313	1.02	1.529	1.2	1.15	0.68	0.867	0.848	0.896	0.945	0.682	0.0025983
A0A452FW25	Phospholipase B-like(predicted) OS=Capra hircus OX=9925 GN=PLBD1 PE=4 SV=1	PLBD1	60.984	33.3	14	25	14	1.402	1.403	1.471	1.296	1.551	0.571	0.623	0.592	0.688	0.655	0.439	3.9918e-08
A0A452FW37	Endothelin-2(predicted) OS=Capra hircus OX=9925 GN=EDN2 PE=4 SV=1	EDN2	19.817	9.6	3	3	3	0.827	1.375	1.18	0.876	0.744	0.532	1.165	1.419	1.106	1.265	1.097	0.75134
A0A452FW39	Chitinase domain-containing protein 1(predicted) OS=Capra hircus OX=9925 GN=LOC102176955 PE=4 SV=1	LOC102176955	38.421	13.3	6	6	6	1.047	0.988	1.226	0.911	0.849	0.759	0.946	1.794	1.125	1.143	1.149	0.51818
A0A452FW51	Ubiquitin-like 4A(predicted) OS=Capra hircus OX=9925 GN=UBL4A PE=4 SV=1	UBL4A	17.741	42.1	6	9	6	0.929	0.942	0.814	0.926	0.9	1.23	1.128	1.115	1.076	1.19	1.272	0.000141378
A0A452FW95	Pitrilysin metallopeptidase 1(predicted) OS=Capra hircus OX=9925 GN=PITRM1 PE=4 SV=1	PITRM1	116.21	7.6	7	7	7	1.357	0.873	1.076	1.126	0.94	1.205	0.874	0.856	0.792	1.285	0.933	0.55274
A0A452FWA7	Sepiapterin reductase(predicted) OS=Capra hircus OX=9925 GN=SPR PE=4 SV=1	SPR	28.803	15.4	3	3	3	0.773	1.152	1.003	0.775	0.98	0.941	0.809	1.22	0.885	1.894	1.228	0.36304
A0A452FWB8	DnaJ (Hsp40) homolog, subfamily C, member 5 gamma(predicted) OS=Capra hircus OX=9925 GN=DNAJC5G PE=4 SV=1	DNAJC5G	19.52	16.1	2	2	2	1.063	1.032	1.288	1.355	1.109	0.885	1.024	0.658	1.123	0.866	0.779	0.03972
A0A452FWD9	Dihydrolipoyl dehydrogenase(predicted) OS=Capra hircus OX=9925 GN=DLD PE=4 SV=1	DLD	53.048	45	20	49	20	1.718	1.056	1.468	1.44	1.085	0.655	0.688	0.715	0.653	0.81	0.52	0.00023975
A0A452FWE2	Molybdopterin molybdenumtransferase(predicted) OS=Capra hircus OX=9925 GN=GPHN PE=4 SV=1	GPHN	83.566	5.6	4	4	4	1.116	1.061	1.074	1.214	0.905	1.141	0.989	0.828	1.005	1.086	0.94	0.41168
A0A452FWF8	Mevalonate kinase(predicted) OS=Capra hircus OX=9925 GN=MVK PE=4 SV=1	MVK	42.242	5.1	2	2	2	0.839	0.893	1.051	0.877	0.813	1.009	1.434	1.123	1.219	1.172	1.332	0.0044988
A0A452FWI2	ras-related protein Rab-6A isoform X1(predicted) OS=Capra hircus OX=9925 GN=RAB6A PE=4 SV=1	RAB6A	23.518	5.3	1	2	1	1.022	0.82	1.555	1.018	0.895	0.985	1.003	1.175	1.068	0.954	0.976	0.99486
A0A452FWK9	trafficking protein particle complex subunit 2(predicted) OS=Capra hircus OX=9925 PE=4 SV=1	---	13.478	7	1	1	1	0.935	0.841	1.059	0.848	0.756	0.974	1.383	1.35	1.04	1.281	1.358	0.0106231
A0A452FWM0	Diphosphoinositol polyphosphate phosphohydrolase 1(predicted) OS=Capra hircus OX=9925 GN=NUDT3 PE=4 SV=1	NUDT3	19.344	10.5	2	2	2	0.738	0.724	0.871	0.769	0.771	1.631	1.543	1.032	0.994	1.343	1.689	0.0089606
A0A452FWM4	CD166 antigen(predicted) OS=Capra hircus OX=9925 GN=ALCAM PE=4 SV=1	ALCAM	63.461	4.6	4	4	4	1.086	0.971	0.897	1.079	1.044	1.119	1.152	0.984	1.023	1.045	1.048	0.32954
A0A452FWQ2	CDGSH iron-sulfur domain-containing protein 1-like(predicted) OS=Capra hircus OX=9925 PE=4 SV=1	---	13.011	48.7	5	6	5	1.325	1.046	1.169	1.268	1.134	0.856	0.821	0.814	0.889	0.868	0.715	7.7723e-05
A0A452FWR4	Putative hydrolase RBBP9(predicted) OS=Capra hircus OX=9925 GN=RBBP9 PE=4 SV=1	RBBP9	21.03	11.8	1	1	1
A0A452FWS6	60S acidic ribosomal protein P1(predicted) OS=Capra hircus OX=9925 PE=4 SV=1	---	10.504	15.2	1	1	1
A0A452FWU4	Serpin family A member 11(predicted) OS=Capra hircus OX=9925 GN=SERPINA11 PE=4 SV=1	SERPINA11	48.239	22	8	10	8	0.974	1.132	1.441	0.959	1.095	0.698	0.729	1.192	1.238	0.995	0.866	0.2864
A0A452FWU9	Ribosomal protein S16(predicted) OS=Capra hircus OX=9925 GN=RPS16 PE=4 SV=1	RPS16	16.445	20.5	3	3	3
A0A452FWV4	V-set and transmembrane domain containing 2B OS=Capra hircus OX=9925 GN=VSTM2B PE=4 SV=1	VSTM2B	37.03	8.6	2	2	2	1.031	1.228	1.298	0.945	1.092	0.714	0.998	1.429	0.609	1.179	0.881	0.34432
A0A452FWX5	Immunoglobulin lambda variable 3-9(predicted) OS=Capra hircus OX=9925 PE=4 SV=1	---	16.149	17.4	2	4	2	1.076	1.176	1.593	1.03	1.114	0.54	0.69	1.055	0.89	1.03	0.702	0.037638
A0A452FWZ1	Phospholipase D3(predicted) OS=Capra hircus OX=9925 GN=PLD3 PE=4 SV=1	PLD3	54.634	13.1	5	7	5	0.958	1.136	1.389	0.953	1.114	1.002	0.765	1.016	1.157	0.977	0.886	0.24812
A0A452FX35	Lysosomal protective protein(predicted) OS=Capra hircus OX=9925 GN=CTSA PE=4 SV=1	CTSA	54.35	17.9	9	16	9	0.994	0.966	0.878	1.125	0.852	0.921	0.79	1.355	1.274	1.414	1.195	0.24554
A0A452FX42	40S ribosomal protein S9(predicted) OS=Capra hircus OX=9925 GN=RPS9 PE=4 SV=1	RPS9	22.591	16	4	5	4	1.705	0.737	1.091	2.206	0.961	0.749	0.651	0.698	0.72	0.62	0.513	0.042581
A0A452FX44	DnaJ heat shock protein family (Hsp40) member A4(predicted) OS=Capra hircus OX=9925 GN=DNAJA4 PE=4 SV=1	DNAJA4	56.669	26.9	12	18	12	0.989	0.868	0.787	1.023	0.761	1.481	1.133	0.982	1.078	1.148	1.315	0.0171038
A0A452FX69	Polypeptide N-acetylgalactosaminyltransferase(predicted) OS=Capra hircus OX=9925 GN=GALNT3 PE=4 SV=1	GALNT3	72.676	5.7	3	3	2	0.951	1	1.089	0.933	1.409	1.062	0.99	0.999	1.043	0.964	0.94	0.54672
A0A452FX99	Thymidylate kinase(predicted) OS=Capra hircus OX=9925 GN=DTYMK PE=4 SV=1	DTYMK	23.845	3.3	1	1	1	1.258	1.008	1.379	1.03	1.164	0.728	0.828	1.039	1.084	0.945	0.792	0.03656
A0A452FXA4	Melanotransferrin(predicted) OS=Capra hircus OX=9925 GN=MELTF PE=4 SV=1	MELTF	80.663	54.9	40	104	40	1.06	0.994	1.14	1.045	1.093	1.152	1.149	0.954	0.84	0.85	0.927	0.28344
A0A452FXB5	Sperm surface protein Sp17(predicted) OS=Capra hircus OX=9925 GN=SPA17 PE=4 SV=1	SPA17	16.985	66	10	17	10	1.091	1.242	0.919	1.02	1.311	1.355	0.872	0.742	0.84	0.862	0.837	0.150719
A0A452FXD6	Chloride intracellular channel protein (Fragment)(predicted) OS=Capra hircus OX=9925 GN=CLIC1 PE=4 SV=1	CLIC1	27.006	32	6	8	6	0.754	0.822	0.733	0.817	1.018	1.609	1.11	0.903	1.478	1.084	1.492	0.0130381
A0A452FXE6	Insulin-like growth factor binding protein 3(predicted) OS=Capra hircus OX=9925 GN=IGFBP3 PE=4 SV=1	IGFBP3	31.476	13.7	3	3	3	1.043	0.886	0.976	1.199	0.978	1.241	1.767	1.118	0.711	0.56	1.062	0.94292
A0A452FXE9	Angiotensin-converting enzyme(predicted) OS=Capra hircus OX=9925 GN=LOC106503207 PE=4 SV=1	LOC106503207	84.369	14.8	14	18	14	1.944	1.392	1.684	1.799	1.348	0.372	0.409	0.495	0.521	0.477	0.278	4.6399e-07
A0A452FXG0	F-actin-capping protein subunit beta(predicted) OS=Capra hircus OX=9925 PE=4 SV=1	---	12.658	39.1	3	4	3	0.947	0.997	1.221	0.94	0.978	1.158	1.189	0.881	1.017	1.099	1.051	0.51524
A0A452FXH3	26S proteasome non-ATPase regulatory subunit 6(predicted) OS=Capra hircus OX=9925 GN=PSMD6 PE=4 SV=1	PSMD6	45.519	43.2	18	23	18	0.803	0.798	0.72	0.881	0.704	1.371	1.363	1.015	1.196	1.267	1.59	0.000143755
A0A452FXJ9	N-acyl-phosphatidylethanolamine-hydrolyzing phospholipase D (Fragment)(predicted) OS=Capra hircus OX=9925 GN=NAPEPLD PE=4 SV=1	NAPEPLD	45.323	9.7	4	4	4	0.9	1.101	0.893	0.981	0.964	1.198	1.138	0.902	1.033	1.299	1.151	0.101561
A0A452FXK0	NudC domain-containing protein 3(predicted) OS=Capra hircus OX=9925 GN=NUDCD3 PE=4 SV=1	NUDCD3	40.222	6.7	2	2	2	1.095	0.875	1.004	1.007	0.873	1.077	1.3	1.122	1.015	1.078	1.152	0.047684
A0A452FXK1	Target of myb1(predicted) OS=Capra hircus OX=9925 GN=TOM1 PE=4 SV=1	TOM1	54.167	16.5	7	7	7	0.908	0.823	0.811	0.977	0.781	1.105	1.381	1.069	1.042	1.346	1.382	0.0022766
A0A452FXL9	Platelet activating factor acetylhydrolase 1b regulatory subunit 1(predicted) OS=Capra hircus OX=9925 GN=PAFAH1B1 PE=4 SV=1	PAFAH1B1	46.67	7.1	3	3	3	1.397	0.877	1.06	1.492	0.865	1.102	0.767	1.463	0.798	0.927	0.889	0.48208
A0A452FXP6	DDB1- and CUL4-associated factor 6 isoform X5(predicted) OS=Capra hircus OX=9925 GN=DCAF6 PE=4 SV=1	DCAF6	94.491	3.9	3	3	3	0.89	0.85	0.583	0.831	0.758	1.678	1.295	1.069	1.075	1.383	1.662	0.0021373
A0A452FXR8	Vanin 2(predicted) OS=Capra hircus OX=9925 GN=VNN2 PE=4 SV=1	VNN2	61.544	24.9	11	17	11	0.883	0.914	2.324	0.912	1.007	1.157	0.597	0.83	0.941	0.868	0.727	0.2579
A0A452FXT9	UPF0606 protein KIAA1549 (Fragment)(predicted) OS=Capra hircus OX=9925 GN=KIAA1549 PE=4 SV=1	KIAA1549	205.92	2.7	5	8	5	1.016	1.053	1.168	1.084	1.011	0.843	0.964	1.024	1.08	0.965	0.914	0.09948
A0A452FXU3	Legumain(predicted) OS=Capra hircus OX=9925 GN=LGMN PE=4 SV=1	LGMN	49.166	18.5	7	13	7	1.1	1.113	1.121	1.198	1.086	0.824	0.798	1.05	1.162	0.872	0.838	0.066745
A0A452FXX0	Malate dehydrogenase, mitochondrial(predicted) OS=Capra hircus OX=9925 GN=MDH2 PE=4 SV=1	MDH2	35.577	58.3	19	54	19	1.244	1.301	0.878	1.122	1.275	1.023	0.778	0.664	0.863	1.058	0.754	0.034415
A0A452FXY3	STX12 protein(predicted) OS=Capra hircus OX=9925 GN=STX12 PE=4 SV=1	STX12	31.335	36.9	8	11	8	1.074	0.984	0.966	1.075	0.908	0.903	0.994	1.055	1.126	1.196	1.053	0.4244
A0A452FXZ5	disintegrin and metalloproteinase domain-containing protein 28(predicted) OS=Capra hircus OX=9925 GN=ADAM28 PE=4 SV=1	ADAM28	73.417	27.9	17	27	17	1.706	0.625	1.809	1.918	0.733	0.99	0.615	0.723	0.755	0.541	0.534	0.073382
A0A452FY04	Ceroid-lipofuscinosis neuronal protein 5(predicted) OS=Capra hircus OX=9925 GN=CLN5 PE=4 SV=1	CLN5	40.69	20.7	6	8	6	1.027	0.954	0.75	1.085	1.053	1.176	1.05	0.944	1.06	1.063	1.087	0.26812
A0A452FY07	3-ketoacyl-CoA thiolase, mitochondrial(predicted) OS=Capra hircus OX=9925 GN=ACAA2 PE=4 SV=1	ACAA2	42.111	47.9	12	14	12	1.182	1.375	1.071	1.067	1.34	0.85	0.854	0.826	0.942	0.988	0.739	0.00155776
A0A452FY13	Protein CASC4(predicted) OS=Capra hircus OX=9925 GN=CASC4 PE=4 SV=1	CASC4	41.134	13.7	5	6	5	0.745	1.122	1.012	0.87	1.163	1.053	1.058	1.357	1.051	0.909	1.105	0.34864
A0A452FY20	Calcium binding protein 39, isoform CRA_a(predicted) OS=Capra hircus OX=9925 GN=CAB39 PE=4 SV=1	CAB39	39.869	18.5	7	9	7	1.039	1.085	0.87	1.177	0.972	1.308	0.943	1.037	1.002	0.962	1.021	0.81522
A0A452FY23	Ubiquitin specific peptidase 7(predicted) OS=Capra hircus OX=9925 GN=USP7 PE=4 SV=1	USP7	128.51	31.5	30	53	30	0.9	0.792	0.821	0.986	0.749	1.096	1.449	1.019	1.193	1.324	1.431	0.0021246
A0A452FY25	V-type proton ATPase subunit G(predicted) OS=Capra hircus OX=9925 GN=ATP6V1G2 PE=4 SV=1	ATP6V1G2	13.565	10.2	1	1	1	1.201	1.216	1.089	1.155	1.071	0.791	0.856	1.104	1.113	0.872	0.826	0.028278
A0A452FY52	Aspartate aminotransferase(predicted) OS=Capra hircus OX=9925 GN=GOT1 PE=4 SV=1	GOT1	46.47	45.3	16	33	16	1.25	1.029	0.947	1.215	1.005	1.072	0.994	0.798	0.907	0.978	0.872	0.104336
A0A452FYA6	Transmembrane protease serine 2 (Fragment)(predicted) OS=Capra hircus OX=9925 GN=TMPRSS2 PE=4 SV=1	TMPRSS2	54.361	27.6	12	12	12	0.928	1.103	1.15	0.873	1.043	0.8	1.023	1.146	1.307	1.029	1.041	0.74332
A0A452FYB3	keratin, type I cytoskeletal 19(predicted) OS=Capra hircus OX=9925 GN=KRT19 PE=4 SV=1	KRT19	43.944	35.3	15	11	6	0.727	1.525	1.429	0.832	1.359	0.618	0.935	1.034	0.937	0.902	0.754	0.190157
A0A452FYB6	C1H3ORF21 protein(predicted) OS=Capra hircus OX=9925 GN=XXYLT1 PE=4 SV=1	XXYLT1	43.85	4.3	2	2	2	0.915	1.128	1.042	0.962	1.096	0.842	1.003	1.282	1.238	0.967	1.037	0.76934
A0A452FYE7	Serine incorporator 5(predicted) OS=Capra hircus OX=9925 GN=SERINC5 PE=4 SV=1	SERINC5	50.276	2.2	1	1	1	0.959	1.121	1.374	1.101	1.118	0.925	0.855	1.267	0.969	0.828	0.854	0.123396
A0A452FYF1	Phosphate carrier protein, mitochondrial(predicted) OS=Capra hircus OX=9925 PE=4 SV=1	---	38.067	20.8	8	11	5	1.771	0.696	2.026	1.654	0.757	0.607	0.749	0.691	0.642	0.804	0.506	0.06342
A0A452FYF6	GTP:AMP phosphotransferase AK3, mitochondrial(predicted) OS=Capra hircus OX=9925 GN=AK3 PE=4 SV=1	AK3	25.698	62.1	15	30	15	1.213	1.246	0.824	1.119	1.299	1.008	0.772	0.635	0.891	1.035	0.761	0.053703
A0A452FYK1	LDL receptor related protein 1(predicted) OS=Capra hircus OX=9925 GN=LRP1 PE=4 SV=1	LRP1	487.86	0.3	1	1	1
A0A452FYL1	Protein-glutamate O-methyltransferase(predicted) OS=Capra hircus OX=9925 GN=ARMT1 PE=4 SV=1	ARMT1	50.969	8.2	4	4	4	1.826	0.927	0.64	1.749	0.91	1.671	0.585	0.625	0.632	0.481	0.66	0.173676
A0A452FYQ9	Ubiquitin-60S ribosomal protein L40(predicted) OS=Capra hircus OX=9925 GN=UBA52 PE=4 SV=1	UBA52	14.728	41.4	5	14	5	0.999	0.87	0.798	0.996	0.892	1.446	1.366	0.85	1.058	1.131	1.285	0.053037
A0A452FYR9	Spartin(predicted) OS=Capra hircus OX=9925 GN=SPART PE=4 SV=1	SPART	72.067	7.3	5	5	5	0.931	0.843	0.939	0.919	0.821	1.233	1.543	1.097	1.016	1.178	1.362	0.0042023
A0A452FYS6	dynactin subunit 1 isoform X2(predicted) OS=Capra hircus OX=9925 GN=DCTN1 PE=4 SV=1	DCTN1	139.54	24.9	26	35	26	0.873	0.891	0.789	0.998	0.869	0.862	1.546	0.994	1.13	1.346	1.33	0.042843
A0A452FYS8	Serine/threonine-protein phosphatase(predicted) OS=Capra hircus OX=9925 GN=PPP5C PE=4 SV=1	PPP5C	56.897	20.6	9	11	9	0.998	0.946	0.923	1.171	0.917	1.379	1.005	0.881	1.018	1.098	1.086	0.409
A0A452FYT6	Sulfotransferase(predicted) OS=Capra hircus OX=9925 GN=HS3ST3B1 PE=4 SV=1	HS3ST3B1	42.725	11.3	4	4	4	0.632	1.241	1.033	0.645	1.159	0.536	1.421	1.896	1.147	0.85	1.242	0.53656
A0A452FYV6	Cofilin-1(predicted) OS=Capra hircus OX=9925 GN=CFL1 PE=4 SV=1	CFL1	18.387	35.2	6	6	5	0.856	0.958	1.026	0.906	1.234	1.64	0.886	0.779	1.162	0.865	1.071	0.80446
A0A452FYW6	Dynein cytoplasmic 1 heavy chain 1(predicted) OS=Capra hircus OX=9925 GN=DYNC1H1 PE=4 SV=1	DYNC1H1	528.94	0.2	1	1	1
A0A452FYY1	Methionine aminopeptidase 2(predicted) OS=Capra hircus OX=9925 GN=METAP2 PE=4 SV=1	METAP2	50.536	10.8	4	4	4	1.123	1.137	1.056	1.355	0.777	1.528	0.817	0.958	0.804	0.872	0.914	0.5011
A0A452FYZ4	Ornithine decarboxylase antizyme 3 OS=Capra hircus OX=9925 GN=OAZ3 PE=4 SV=1	OAZ3	28.439	4.1	1	1	1	0.839	1.077	1.77	0.979	1.037	0.801	0.802	1.091	1.23	0.872	0.841	0.34344
A0A452FZ04	Apolipoprotein H(predicted) OS=Capra hircus OX=9925 GN=APOH PE=4 SV=1	APOH	38.264	32.8	11	8	6	0.795	1.171	2.339	0.861	1.094	0.573	0.898	1.193	0.826	0.65	0.661	0.150101
A0A452FZ12	Disintegrin and metalloproteinase domain-containing protein 1a (Fragment)(predicted) OS=Capra hircus OX=9925 PE=4 SV=1	---	87.835	23.6	19	66	19	1.359	1.1	1.017	1.365	1.432	0.96	0.892	0.547	0.7	0.794	0.621	0.0036771
A0A452FZ51	Sodium/potassium-transporting ATPase subunit alpha(predicted) OS=Capra hircus OX=9925 GN=ATP1A4 PE=4 SV=1	ATP1A4	113.72	45	44	102	32	1.164	1.11	1.123	1.104	1.258	0.972	0.981	0.763	0.875	0.966	0.791	0.0022386
A0A452FZ54	Pleckstrin-like protein domain-containing family A member 4(predicted) OS=Capra hircus OX=9925 GN=PLEKHA4 PE=4 SV=1	PLEKHA4	85.193	1.4	1	1	1	0.899	0.837	0.428	0.852	1.176	0.587	1.506	0.718	1.619	1.646	1.449	0.26748
A0A452FZ55	PCK2(predicted) OS=Capra hircus OX=9925 GN=PCK2 PE=4 SV=1	PCK2	70.711	1.6	1	1	1	1.31	1.128	1.378	0.803	1.11	0.922	0.823	1.036	0.761	1.197	0.827	0.172678
A0A452FZ69	Thrombospondin-4(predicted) OS=Capra hircus OX=9925 GN=THBS4 PE=4 SV=1	THBS4	105.83	28.4	18	28	18	0.772	1.577	1.374	0.845	1.381	0.795	0.813	0.853	0.718	1.088	0.717	0.096163
A0A452FZ82	Ectonucleotide pyrophosphatase/phosphodiesterase 1(predicted) OS=Capra hircus OX=9925 GN=ENPP1 PE=4 SV=1	ENPP1	86.602	16.4	13	14	13	1.191	0.95	0.899	1.116	1.014	1.115	0.864	1.395	1.068	0.825	1.019	0.95942
A0A452FZ93	Prostaglandin E synthase(predicted) OS=Capra hircus OX=9925 GN=PTGES PE=4 SV=1	PTGES	17.329	6.5	1	1	1	0.946	1.436	1.504	0.979	1.369	0.794	0.685	0.912	0.939	0.905	0.679	0.0118169
A0A452FZA0	Sjogren syndrome/scleroderma autoantigen 1(predicted) OS=Capra hircus OX=9925 GN=SSSCA1 PE=4 SV=1	SSSCA1	21.554	41.2	6	7	6	1.149	0.727	0.578	1.418	0.768	0.962	1.187	0.946	1.065	1.131	1.14	0.3434
A0A452FZA5	Coiled-coil domain-containing protein 135(predicted) OS=Capra hircus OX=9925 GN=DRC7 PE=4 SV=1	DRC7	100.91	1.2	1	1	1	1.344	1.411	1.087	1.252	1.589	0.762	0.548	0.885	0.791	0.785	0.564	0.00049857
A0A452FZA9	Glutathione S-transferase Mu 1(predicted) OS=Capra hircus OX=9925 GN=LOC108633298 PE=4 SV=1	LOC108633298	25.707	39.4	9	16	2	0.891	0.995	1.032	1.032	1.082	1.163	0.935	1.01	1.12	0.896	1.018	0.80656
A0A452FZB0	SPARC-related modular calcium-binding protein 2 (Fragment)(predicted) OS=Capra hircus OX=9925 GN=SMOC2 PE=4 SV=1	SMOC2	49.136	8.2	3	3	3	0.989	1.325	1.154	1.03	0.926	0.728	0.903	1.296	1.314	0.832	0.935	0.5358
A0A452FZC2	Phosphoinositide phospholipase C(predicted) OS=Capra hircus OX=9925 GN=PLCH1 PE=4 SV=1	PLCH1	187.99	0.9	2	2	2	1.329	0.945	1.051	1.492	0.822	1.442	0.845	0.996	0.843	0.722	0.86	0.35806
A0A452FZC4	Ropporin-1-like protein(predicted) OS=Capra hircus OX=9925 GN=ROPN1L PE=4 SV=1	ROPN1L	24.413	33.9	6	8	6	1.116	0.949	1.168	1.163	1.003	1.218	0.917	1.085	0.973	0.881	0.94	0.38954
A0A452FZD1	Ribosomal protein L22(predicted) OS=Capra hircus OX=9925 GN=RPL22 PE=4 SV=1	RPL22	14.759	10.2	1	1	1	1.213	0.789	0.894	1.839	1.452	1.127	0.694	0.704	0.85	0.842	0.682	0.083641
A0A452FZD4	SEPT4(predicted) OS=Capra hircus OX=9925 GN=SEPT4 PE=4 SV=1	SEPT4	54.89	10.7	5	5	5	2.231	1.092	1.191	1.869	1.659	0.323	0.374	0.586	0.628	0.475	0.297	0.000181535
A0A452FZD6	Geranylgeranyl transferase type-2 subunit alpha(predicted) OS=Capra hircus OX=9925 GN=RABGGTA PE=4 SV=1	RABGGTA	62.809	14	9	9	9	0.828	1.004	0.861	0.947	0.964	1.262	1.21	1.063	1.024	1.152	1.24	0.0037159
A0A452FZK8	Protein OS-9(predicted) OS=Capra hircus OX=9925 GN=OS9 PE=4 SV=1	OS9	72.79	15.4	9	14	9	0.881	0.977	1.443	1	0.864	0.699	0.871	1.731	1.182	0.997	1.061	0.87414
A0A452FZP2	Isochorismatase domain-containing protein 2(predicted) OS=Capra hircus OX=9925 GN=ISOC2 PE=4 SV=1	ISOC2	22.431	28.9	4	11	4	1.541	1.22	1.131	1.387	0.992	0.715	0.668	0.765	0.931	1.009	0.652	0.0045617
A0A452FZP6	Isoaspartyl peptidase/L-asparaginase(predicted) OS=Capra hircus OX=9925 GN=ASRGL1 PE=4 SV=1	ASRGL1	32.043	51.1	12	40	12	1.891	1.077	1.226	1.725	1.12	0.783	0.579	0.647	0.574	0.716	0.469	0.00047905
A0A452FZR8	Oxidoreductase HTATIP2(predicted) OS=Capra hircus OX=9925 GN=HTATIP2 PE=4 SV=1	HTATIP2	27.12	19.4	5	5	5	0.667	0.752	0.656	0.634	0.664	1.284	1.769	0.916	1.464	1.451	2.041	0.0035646
A0A452FZU7	Microfibril-associated glycoprotein 4 (Fragment)(predicted) OS=Capra hircus OX=9925 GN=MFAP4 PE=4 SV=1	MFAP4	28.563	9.8	2	2	2	0.946	1.356	1.865	1.047	1.29	0.962	0.682	1.229	0.672	0.527	0.626	0.033857
A0A452FZY4	Acyl-CoA thioesterase 7(predicted) OS=Capra hircus OX=9925 GN=ACOT7 PE=4 SV=1	ACOT7	41.94	28.5	8	9	8	0.918	0.873	0.781	1.056	0.793	1.437	1.086	1.56	0.868	1.163	1.383	0.030438
A0A452G000	DAZ-associated protein 1 isoform X1(predicted) OS=Capra hircus OX=9925 GN=DAZAP1 PE=4 SV=1	DAZAP1	43.541	15.5	4	7	4	1.354	0.74	1	1.668	0.859	1.229	0.96	0.926	0.798	0.747	0.829	0.38448
A0A452G029	Hsp70-binding protein 1(predicted) OS=Capra hircus OX=9925 GN=HSPBP1 PE=4 SV=1	HSPBP1	39.16	15.1	5	7	5	1.001	0.98	1.006	0.986	1.01	1.116	0.981	1.229	1.073	1.106	1.105	0.057259
A0A452G034	Sodium- and chloride-dependent taurine transporter(predicted) OS=Capra hircus OX=9925 GN=SLC6A6 PE=4 SV=1	SLC6A6	69.749	2.7	1	1	1	1.402	1.399	1.53	1.126	1.637	0.667	0.691	0.956	0.615	0.484	0.481	0.00035735
A0A452G069	WD repeat-containing protein 1(predicted) OS=Capra hircus OX=9925 GN=WDR1 PE=4 SV=1	WDR1	66.326	9.6	5	6	5	0.909	0.97	0.799	0.837	1.023	1.488	1.153	0.953	1.107	1.012	1.259	0.037539
A0A452G093	BPI fold containing family A member 1(predicted) OS=Capra hircus OX=9925 GN=BPIFA1 PE=4 SV=1	BPIFA1	23.967	6.1	1	1	1	0.491	2.795	1.432	0.604	1.164	0.547	0.498	0.935	0.678	1.342	0.617	0.35208
A0A452G094	Matrix metallopeptidase 23(predicted) OS=Capra hircus OX=9925 GN=MMP23B PE=4 SV=1	MMP23B	43.936	3.8	2	2	2	0.963	1.184	0.91	0.894	1.239	1.266	0.949	1.176	0.885	1.007	1.018	0.85314
A0A452G0A7	Amine oxidase(predicted) OS=Capra hircus OX=9925 GN=LOC102170459 PE=4 SV=1	LOC102170459	87.165	11.7	11	31	0
A0A452G0B9	Sperm associated antigen 6(predicted) OS=Capra hircus OX=9925 GN=SPAG6 PE=4 SV=1	SPAG6	55.443	11.2	5	8	5	1.756	1.21	1.092	1.34	1.264	0.63	0.695	0.872	0.722	0.829	0.563	0.00043926
A0A452G0C2	Trifunctional enzyme subunit beta, mitochondrial(predicted) OS=Capra hircus OX=9925 GN=HADHB PE=4 SV=1	HADHB	51.714	20.7	8	11	8	1.057	0.969	0.941	0.816	0.815	1.019	1.295	0.784	0.956	1.524	1.213	0.2157
A0A452G0D5	ACAP1(predicted) OS=Capra hircus OX=9925 GN=LOC102184370 PE=4 SV=1	LOC102184370	56.292	16.2	8	8	8	1.284	0.972	0.975	1.145	1.319	1.037	0.94	0.913	0.879	0.999	0.837	0.044159
A0A452G0H1	eppin(predicted) OS=Capra hircus OX=9925 GN=LOC102189601 PE=4 SV=1	LOC102189601	15.125	55.2	10	27	10	1.013	0.804	0.783	1.12	0.961	1.795	1.35	0.8	0.846	0.922	1.22	0.37924
A0A452G0I1	Eukaryotic translation initiation factor 3 subunit C(predicted) OS=Capra hircus OX=9925 GN=LOC102182187 PE=4 SV=1	LOC102182187	104.07	10.1	11	11	11	1.2	0.939	0.851	1.36	0.902	1.027	1.118	0.829	1.063	0.951	0.95	0.71004
A0A452G0J3	Metallopeptidase inhibitor 2(predicted) OS=Capra hircus OX=9925 GN=TIMP2 PE=4 SV=1	TIMP2	24.36	73.6	27	229	27	0.941	1.069	1.316	0.842	0.876	0.862	0.966	1.316	1.105	0.978	1.036	0.73044
A0A452G0L1	Involucrin(predicted) OS=Capra hircus OX=9925 GN=IVL PE=4 SV=1	IVL	47.777	8.9	3	4	3	0.882	0.771	1.199	1.112	0.821	1.119	1.086	1.058	1.015	1.135	1.131	0.195459
A0A452G0S2	Protein FAM162A(predicted) OS=Capra hircus OX=9925 GN=FAM162A PE=4 SV=1	FAM162A	17.357	7.3	1	1	1
A0A452G0W0	60S ribosomal protein L8(predicted) OS=Capra hircus OX=9925 GN=RPL8 PE=4 SV=1	RPL8	28.024	7.4	2	2	2	1.103	0.909	1.138	1.742	0.911	0.685	0.894	1.093	1.054	0.933	0.803	0.199037
A0A452G0W3	Palmitoyl-protein thioesterase 1(predicted) OS=Capra hircus OX=9925 GN=PPT1 PE=4 SV=1	PPT1	34.108	26.1	8	22	8	0.821	0.939	1.014	0.814	0.888	1.06	1.146	1.255	1.21	1.145	1.299	0.00078418
A0A452G0X1	N-sulfoglucosamine sulfohydrolase(predicted) OS=Capra hircus OX=9925 GN=SGSH PE=4 SV=1	SGSH	57.213	8.9	4	5	4	1.001	1.013	1.178	1.13	1.101	1.099	0.9	0.841	0.991	0.877	0.868	0.036517
A0A452G0Y9	nuclear transport factor 2 isoform X1(predicted) OS=Capra hircus OX=9925 GN=NUTF2 PE=4 SV=1	NUTF2	14.478	74.8	6	15	6	0.838	0.953	0.856	0.837	0.973	1.529	1.23	0.957	0.998	1.232	1.334	0.0158627
A0A452G0Z2	semaphorin-7A(predicted) OS=Capra hircus OX=9925 GN=SEMA7A PE=4 SV=1	SEMA7A	74.868	21.8	13	15	13	1.181	0.996	1.165	1.354	0.962	1.035	0.922	1.138	1.02	0.747	0.859	0.143724
A0A452G0Z3	Dynein intermediate chain 2, axonemal(predicted) OS=Capra hircus OX=9925 GN=DNAI2 PE=4 SV=1	DNAI2	58.279	5.1	3	3	3	2.164	1.424	0.986	1.952	1.36	0.508	0.546	0.44	0.575	0.454	0.32	7.7197e-05
A0A452G119	Tubulin alpha-1C chain(predicted) OS=Capra hircus OX=9925 GN=TUBA1C PE=4 SV=1	TUBA1C	49.84	37	13	37	1	0.687	0.957	1.1	1.196	1.171	1	1.199	1.184	0.909	1.061	1.047	0.6135
A0A452G158	CKLF-like MARVEL transmembrane domain-containing protein 2(predicted) OS=Capra hircus OX=9925 GN=CMTM2 PE=4 SV=1	CMTM2	27.317	26.6	6	16	6	1.652	0.959	1.459	1.506	1.484	0.558	0.631	0.517	0.645	0.654	0.426	4.2483e-05
A0A452G176	Ferritin(predicted) OS=Capra hircus OX=9925 GN=FTL PE=4 SV=1	FTL	19.987	57.1	8	14	3	1.196	0.942	0.958	1.078	0.964	1.138	1.153	0.787	0.935	1.128	1.001	0.94814
A0A452G177	Deoxyguanosine kinase isoform a(predicted) OS=Capra hircus OX=9925 GN=DGUOK PE=4 SV=1	DGUOK	32.075	7.2	1	1	1	1.06	1.121	1.219	0.983	1.088	0.62	0.993	1.082	1.074	1.201	0.908	0.38564
A0A452G179	Serine peptidase inhibitor, Kunitz type 1(predicted) OS=Capra hircus OX=9925 GN=SPINT1 PE=4 SV=1	SPINT1	56.916	11.8	5	6	5	1.165	1.13	1.21	1.148	1.186	0.955	0.972	1.064	0.962	0.744	0.804	0.021342
A0A452G1A0	NAD(P)(+)--arginine ADP-ribosyltransferase(predicted) OS=Capra hircus OX=9925 GN=ART5 PE=4 SV=1	ART5	32.385	11.5	3	3	3	1.229	1.153	0.754	1.364	1.282	1.048	0.922	0.929	0.892	0.858	0.804	0.144905
A0A452G1C1	Beta-crystallin A4(predicted) OS=Capra hircus OX=9925 GN=CRYBA4 PE=4 SV=1	CRYBA4	22.501	3.6	1	1	1	0.599	1.081	1.672	1.047	0.898	1	1.09	1.768	0.819	0.652	1.006	0.99282
A0A452G1F1	Neuraminidase 3(predicted) OS=Capra hircus OX=9925 GN=NEU3 PE=4 SV=1	NEU3	49.024	2.5	1	1	1	1.096	0.947	1.297	1.147	0.907	1.005	0.789	1.092	1.169	1.021	0.941	0.53202
A0A452G1I9	EH domain-containing protein 4(predicted) OS=Capra hircus OX=9925 GN=EHD4 PE=4 SV=1	EHD4	61.054	41.1	20	25	15	1.233	0.927	0.935	1.313	1.016	1.045	0.781	1.64	0.894	0.682	0.93	0.52436
A0A452G1J9	Non-lysosomal glucosylceramidase(predicted) OS=Capra hircus OX=9925 GN=GBA2 PE=4 SV=1	GBA2	102.33	3	2	2	2
A0A452G1L9	protein-glutamine gamma-glutamyltransferase 2 isoform X3(predicted) OS=Capra hircus OX=9925 GN=TGM2 PE=4 SV=1	TGM2	68.439	6.3	3	3	3	0.902	1.321	0.982	1.233	1.169	1.105	0.838	0.88	1.166	0.84	0.861	0.176197
A0A452G1Q2	immunoglobulin superfamily member 10(predicted) OS=Capra hircus OX=9925 GN=IGSF10 PE=4 SV=1	IGSF10	287.55	4.4	12	13	12	0.62	1.486	0.946	0.642	1.325	0.706	1.78	1.066	1.018	0.714	1.053	0.83068
A0A452G1Q5	60S ribosomal protein L10 (Fragment)(predicted) OS=Capra hircus OX=9925 GN=RPL10 PE=4 SV=1	RPL10	24.603	7.9	2	2	2	1.431	0.85	0.978	1.718	0.799	0.856	0.971	1.019	0.928	0.901	0.809	0.3363
A0A452G1R3	Histidine triad nucleotide-binding protein 3(predicted) OS=Capra hircus OX=9925 GN=HINT3 PE=4 SV=1	HINT3	20.463	9.3	2	3	2	0.76	0.843	0.804	0.803	0.815	1.21	1.541	1.067	1.121	1.433	1.583	0.0034608
A0A452G1R9	Nucleobindin 2(predicted) OS=Capra hircus OX=9925 GN=NUCB2 PE=4 SV=1	NUCB2	49.185	58.6	27	98	27	0.742	0.919	0.854	0.69	0.726	1.266	1.324	1.369	1.324	1.139	1.634	4.3766e-05
A0A452G1S0	ATP-dependent 6-phosphofructokinase(predicted) OS=Capra hircus OX=9925 GN=PFKP PE=4 SV=1	PFKP	85.972	43.9	33	95	31	0.965	1.09	0.763	1.012	1.069	1.368	1.033	0.847	0.921	1.214	1.099	0.44928
A0A452G1T2	MROH7(predicted) OS=Capra hircus OX=9925 GN=MROH7 PE=4 SV=1	MROH7	99.823	3.9	3	3	3	0.924	0.806	0.951	1.248	0.962	1.082	1.339	1.028	1.069	1.017	1.132	0.176599
A0A452G1V4	LOC527795 protein (Fragment)(predicted) OS=Capra hircus OX=9925 GN=LOC102188314 PE=4 SV=1	LOC102188314	42.13	9.5	3	5	3	0.782	0.974	0.743	0.865	1.106	1.388	1.878	0.87	1.006	1.091	1.394	0.081921
A0A452G1X4	Phospholipase B-like(predicted) OS=Capra hircus OX=9925 GN=PLBD2 PE=4 SV=1	PLBD2	65.523	30.4	17	28	17	1.553	1.371	1.143	1.311	1.557	0.737	0.725	0.519	0.657	0.652	0.474	2.1226e-05
A0A452G224	Glypican-1(predicted) OS=Capra hircus OX=9925 GN=GPC1 PE=4 SV=1	GPC1	60.835	3.4	2	3	2	0.87	1.323	1.04	0.868	1.327	0.575	0.977	1.24	1.289	0.952	0.927	0.5941
A0A452G234	Adaptor related protein complex 2 subunit alpha 1(predicted) OS=Capra hircus OX=9925 GN=AP2A1 PE=4 SV=1	AP2A1	100.62	1.3	1	1	1
A0A452G252	Peptide YY(predicted) OS=Capra hircus OX=9925 GN=PYY PE=4 SV=1	PYY	9.9313	9.2	1	2	1	0.72	0.807	1.356	0.858	0.85	0.893	1.254	1.179	1.338	1.195	1.276	0.077756
A0A452G271	40S ribosomal protein S18 OS=Capra hircus OX=9925 GN=RPS18 PE=4 SV=1	RPS18	17.587	9.9	2	2	2	1.089	0.992	1.07	1.369	1.088	0.893	0.888	1.086	1.023	0.961	0.865	0.065882
A0A452G286	Ribosomal protein S19 OS=Capra hircus OX=9925 GN=RPS19 PE=4 SV=1	RPS19	13.249	21	3	3	3	1.287	0.675	0.649	1.898	0.687	1.513	0.792	0.839	1.156	0.918	1.004	0.77082
A0A452G2D4	Kinectin 1(predicted) OS=Capra hircus OX=9925 GN=KTN1 PE=4 SV=1	KTN1	150.66	5.2	6	7	6	1.221	1.059	1.089	1.055	1.024	0.942	0.888	1.063	1.074	0.951	0.903	0.063282
A0A452G2D9	Very long-chain specific acyl-CoA dehydrogenase, mitochondrial(predicted) OS=Capra hircus OX=9925 GN=ACADVL PE=4 SV=1	ACADVL	70.609	39.5	23	40	23	1.384	0.865	1.033	1.09	0.847	1.096	0.942	0.736	0.91	1.203	0.936	0.61988
A0A452G2H2	Omega-amidase NIT2(predicted) OS=Capra hircus OX=9925 GN=NIT2 PE=4 SV=1	NIT2	30.689	15.8	5	7	5	1.175	0.953	0.803	0.884	1.109	1.332	1.249	0.947	0.962	1.17	1.149	0.193878
A0A452G2K2	ATP synthase subunit e, mitochondrial(predicted) OS=Capra hircus OX=9925 PE=4 SV=1	---	7.3375	19.4	1	1	1	1.178	0.886	1.125	1.16	0.917	0.883	1.244	0.868	0.979	1.167	0.976	0.781
A0A452G2K7	WD repeat domain, phosphoinositide interacting 2(predicted) OS=Capra hircus OX=9925 GN=WIPI2 PE=4 SV=1	WIPI2	47.548	1.6	1	1	1	0.79	0.582	1.156	0.92	0.789	1.16	1.521	1.15	1.17	1.198	1.463	0.0122003
A0A452G2N4	FAD synthase(predicted) OS=Capra hircus OX=9925 GN=FLAD1 PE=4 SV=1	FLAD1	54.26	14.1	5	6	5	0.788	0.908	0.78	0.802	0.955	1.451	1.118	1.045	1.121	1.394	1.448	0.00154391
A0A452G2P9	Receptor expression-enhancing protein(predicted) OS=Capra hircus OX=9925 GN=REEP6 PE=4 SV=1	REEP6	20.487	8	1	1	1	1.228	0.915	1.296	1.096	1.121	0.879	0.923	1.01	0.998	0.988	0.848	0.040898
A0A452G2Q3	Glutamine synthetase(predicted) OS=Capra hircus OX=9925 GN=GLUL PE=4 SV=1	GLUL	42.045	38.3	13	20	13	1.236	0.851	0.884	1.374	0.865	1.002	0.904	0.797	0.863	1.141	0.903	0.47986
A0A452G2S0	Eukaryotic translation elongation factor 1 epsilon 1(predicted) OS=Capra hircus OX=9925 GN=EEF1E1 PE=4 SV=1	EEF1E1	19.756	8.6	1	1	1	1.341	0.845	0.803	1.868	0.675	1.345	0.742	1.023	0.785	1.034	0.891	0.771
A0A452G2S1	Low molecular weight phosphotyrosine protein phosphatase(predicted) OS=Capra hircus OX=9925 GN=ACP1 PE=4 SV=1	ACP1	17.306	13.2	2	3	2	0.9	0.753	0.793	1.089	0.959	2.097	0.938	1.072	0.975	0.897	1.33	0.20078
A0A452G2S9	Doublecortin domain containing 2C(predicted) OS=Capra hircus OX=9925 GN=DCDC2C PE=4 SV=1	DCDC2C	38.87	20.5	6	7	6	1.177	1.451	0.908	1.071	1.721	0.805	0.776	0.761	0.818	0.67	0.605	0.0153235
A0A452G2Y4	Histidine-rich glycoprotein(predicted) OS=Capra hircus OX=9925 GN=HRG PE=4 SV=1	HRG	60.148	3.8	2	2	2	0.816	0.767	2.241	0.984	0.916	0.654	0.966	1.37	0.912	0.935	0.845	0.64874
A0A452G2Z1	60S ribosomal protein L3(predicted) OS=Capra hircus OX=9925 GN=RPL3 PE=4 SV=1	RPL3	46.051	10.2	5	6	5	1.731	0.746	1.028	2.231	0.858	0.721	0.616	0.985	0.786	0.683	0.575	0.066521
A0A452G2Z9	phosducin-like protein 2(predicted) OS=Capra hircus OX=9925 GN=PDCL2 PE=4 SV=1	PDCL2	28.258	21.9	4	5	4	0.737	0.771	0.695	0.868	0.797	1.594	1.221	1.043	1.189	1.427	1.674	0.00028265
A0A452G300	26S proteasome non-ATPase regulatory subunit 12 (Fragment)(predicted) OS=Capra hircus OX=9925 GN=PSMD12 PE=4 SV=1	PSMD12	53.02	30.5	15	25	15	0.897	0.753	0.641	0.977	0.731	1.57	1.497	0.935	1.19	1.264	1.614	0.0040571
A0A452G316	Calpain-7-like protein(predicted) OS=Capra hircus OX=9925 GN=ADGB PE=4 SV=1	ADGB	187.06	3.3	4	4	4	1.57	1.427	0.911	1.28	1.946	0.6	0.497	0.768	0.567	0.677	0.436	0.00053549
A0A452G320	Alpha-mannosidase(predicted) OS=Capra hircus OX=9925 GN=LOC102173830 PE=4 SV=1	LOC102173830	113.35	39.2	36	109	14	0.957	1.042	0.915	1.054	1.097	1.268	1.127	0.968	1.006	0.802	1.021	0.89642
A0A452G333	Carboxypeptidase M(predicted) OS=Capra hircus OX=9925 GN=CPM PE=4 SV=1	CPM	50.261	3.8	2	2	2	1.101	0.826	0.931	0.964	1.097	1.94	0.972	0.89	0.958	0.775	1.125	0.7054
[truncated: 300 more rows]

## Sheet: Peptide_quant
ID	Sequence	Protein accession	Protein description	Charge	m/z	mass error [ppm]	PEP	Score	Unique [yes/no]	B1	B2	B3	B4	B5	G1	G2	G3	G4	G5
0	AAAAPSSFQLLYDLK	A0A452DNI3	MTHFD1 protein(predicted) OS=Capra hircus OX=9925 GN=MTHFD1 PE=4 SV=1	3	532.287	4.571	5.3808e-16	121.45	yes	0.639	0.728	0.58	0.758	0.883	0.942	1.696	0.581	1.335	1.858
1	AAAASAAEAGIATTGTEDSDDALLK	A0A452G3P7	PSMD4(predicted) OS=Capra hircus OX=9925 GN=PSMD4 PE=4 SV=1	4	580.784	3.5177	0.00091809	50.158	yes	NA	NA	NA	NA	NA	NA	NA	NA	NA	NA
2	AAAASAAEAGIATTGTEDSDDALLK	A0A452G3P7	PSMD4(predicted) OS=Capra hircus OX=9925 GN=PSMD4 PE=4 SV=1	3	774.043	3.3956	2.7301e-128	232.29	yes	0.785	0.797	1.111	0.745	0.845	1.309	1.257	0.769	1.13	1.253
3	AAAASAEGR	A0A452G875	Family with sequence similarity 71 member B(predicted) OS=Capra hircus OX=9925 GN=FAM71B PE=4 SV=1	2	402.204	1.6577	8.3705e-06	137.05	yes	2.51	0.507	2.902	2.225	1.049	0.122	0.148	0.109	0.283	0.144
4	AAADFATHGK	A0A452EVN3	Microtubule associated monooxygenase, calponin and LIM domain containing 1(predicted) OS=Capra hircus OX=9925 GN=MICAL1 PE=4 SV=1	3	330.166	2.593	0.015442	52.167	yes	0.817	0.775	0.69	0.835	0.763	1.282	1.634	0.856	0.988	1.36
5	AAAEGDGVDALINTLSSK	A0A452FUX3	Armadillo repeat-containing protein 3 (Fragment)(predicted) OS=Capra hircus OX=9925 GN=ARMC3 PE=4 SV=1	3	577.963	3.1043	0.00027366	77.506	yes	NA	NA	NA	NA	NA	NA	NA	NA	NA	NA
6	AAAEVNQDYGLDPK	A0A452DPJ7	Fumarate hydratase(predicted) OS=Capra hircus OX=9925 GN=FH PE=4 SV=1	3	497.576	3.0451	9.9242e-11	107.74	yes	1.582	1.392	1.445	1.243	1.426	0.521	0.697	0.407	0.578	0.709
7	AAAEVNQDYGLDPK	A0A452DPJ7	Fumarate hydratase(predicted) OS=Capra hircus OX=9925 GN=FH PE=4 SV=1	2	745.86	3.1897	3.1234e-60	199.37	yes	2.048	1.024	1.318	1.596	0.97	0.838	0.597	0.335	0.492	0.782
8	AAAEVNQDYGLDPK	A0A452DPJ7	Fumarate hydratase(predicted) OS=Capra hircus OX=9925 GN=FH PE=4 SV=1	4	373.433	2.9956	1.4256e-05	88.282	yes	1.346	1.029	1.191	1.206	0.968	0.702	0.859	0.738	0.94	1.02
9	AAAEVNQDYGLDPK	A0A452DPJ7	Fumarate hydratase(predicted) OS=Capra hircus OX=9925 GN=FH PE=4 SV=1	3	497.576		2.7567e-08	91.812	yes	NA	NA	NA	NA	NA	NA	NA	NA	NA	NA
10	AAAHHYGAQCDKPNK	A0A452FT17	NADH dehydrogenase [ubiquinone] 1 alpha subcomplex subunit 8(predicted) OS=Capra hircus OX=9925 GN=NDUFA8 PE=4 SV=1	5	334.36	3.0699	7.9649e-16	118.76	yes	2.453	1.061	1.89	2.225	1.258	0.184	0.229	0.196	0.298	0.206
11	AAAHHYGAQCDKPNK	A0A452FT17	NADH dehydrogenase [ubiquinone] 1 alpha subcomplex subunit 8(predicted) OS=Capra hircus OX=9925 GN=NDUFA8 PE=4 SV=1	4	417.698	3.6669	0.00017109	71.513	yes	2.131	0.665	1.446	1.773	0.847	0.526	0.386	0.725	0.746	0.754
12	AAAKPENLSLVVHGPGDLR	A0A452FJB0	Sorbitol dehydrogenase(predicted) OS=Capra hircus OX=9925 GN=SORD PE=4 SV=1	4	497.275	2.7451	0.0001981	61.276	yes	0.734	0.871	0.709	0.819	0.881	1.455	1.41	0.728	1.095	1.299
13	AAAKPENLSLVVHGPGDLR	A0A452FJB0	Sorbitol dehydrogenase(predicted) OS=Capra hircus OX=9925 GN=SORD PE=4 SV=1	3	662.697	2.8589	0.0010152	55.575	yes	0.688	0.92	0.592	0.716	0.819	1.571	1.462	0.833	1.154	1.245
14	AAAKPENLSLVVHGPGDLR	A0A452FJB0	Sorbitol dehydrogenase(predicted) OS=Capra hircus OX=9925 GN=SORD PE=4 SV=1	4	497.275	3.5853	0.0017365	48.616	yes	0.59	0.87	0.66	0.7	0.942	1.284	1.607	0.945	1.058	1.346
15	AAALAHLDR	A0A452ENC5	Membrane primary amine oxidase(predicted) OS=Capra hircus OX=9925 PE=4 SV=1	3	313.179	1.8677	0.00078645	100.57	no	1.376	1.899	0.881	0.979	1.398	0.314	0.631	0.727	0.977	0.818
16	AAALAHLDR	A0A452ENC5	Membrane primary amine oxidase(predicted) OS=Capra hircus OX=9925 PE=4 SV=1	2	469.264	3.6398	0.009831	74.424	no	1.261	1.866	0.701	0.957	1.258	0.654	0.617	0.809	0.983	0.894
17	AAALAHLDR	A0A452ENC5	Membrane primary amine oxidase(predicted) OS=Capra hircus OX=9925 PE=4 SV=1	3	313.179	2.3068	3.2055e-06	136.21	no	1.022	1.96	0.334	0.784	1.509	NA	NA	NA	0.391	NA
18	AAALAHLDR	A0A452ENC5	Membrane primary amine oxidase(predicted) OS=Capra hircus OX=9925 PE=4 SV=1	2	469.264	2.417	0.00022957	124.92	no	NA	NA	NA	NA	NA	NA	NA	NA	NA	NA
19	AAALAHLDR	A0A452ENC5	Membrane primary amine oxidase(predicted) OS=Capra hircus OX=9925 PE=4 SV=1	3	313.179	1.4104	0.013617	57.859	no	NA	NA	NA	NA	NA	NA	NA	NA	NA	NA
20	AAALAHLDR	A0A452ENC5	Membrane primary amine oxidase(predicted) OS=Capra hircus OX=9925 PE=4 SV=1	3	313.179	1.9585	0.0086599	62.201	no	NA	NA	NA	NA	NA	NA	NA	NA	NA	NA
21	AAALSATSAGR	A0A452E1T9	Calicin(predicted) OS=Capra hircus OX=9925 GN=CCIN PE=4 SV=1	2	488.265	2.4489	3.5965e-22	169.82	yes	1.171	0.802	2.945	1	0.943	1.299	0.291	0.496	0.568	0.484
22	AAANAQNWANK	D6PX62	Cysteine-rich secretory protein 3 OS=Capra hircus OX=9925 GN=Crisp3 PE=2 SV=1	3	386.86	2.646	0.00093141	76.282	yes	NA	NA	NA	NA	NA	NA	NA	NA	NA	NA
23	AAANAQNWANK	D6PX62	Cysteine-rich secretory protein 3 OS=Capra hircus OX=9925 GN=Crisp3 PE=2 SV=1	2	579.786	3.1418	6.6267e-30	180.07	yes	1.512	1.205	0.734	1.628	0.771	0.884	0.67	0.962	0.543	1.091
24	AAANAQNWANK	D6PX62	Cysteine-rich secretory protein 3 OS=Capra hircus OX=9925 GN=Crisp3 PE=2 SV=1	3	386.86	3.0945	2.1325e-06	119.68	yes	1.168	0.923	0.997	1.086	0.942	0.67	0.919	1.147	0.917	1.23
25	AAANAQNWANK	D6PX62	Cysteine-rich secretory protein 3 OS=Capra hircus OX=9925 GN=Crisp3 PE=2 SV=1	2	579.786	3.6137	6.6267e-30	180.07	yes	1.606	1.097	0.664	1.72	0.907	0.819	0.71	0.843	0.56	1.075
26	AAANMDLMR	A0A452DVV1	Cytosol aminopeptidase(predicted) OS=Capra hircus OX=9925 GN=LAP3 PE=4 SV=1	2	496.736	2.5518	0.058262	55.046	yes	NA	NA	NA	NA	NA	NA	NA	NA	NA	NA
28	AAASFFSASCVPCADQSSFPK	A0A452FJF9	Serotransferrin(predicted) OS=Capra hircus OX=9925 GN=TF PE=4 SV=1	3	745.666	3.7832	4.8897e-32	148.06	yes	1.192	0.957	1.989	1.127	0.943	0.441	0.778	1.002	0.83	0.741
29	AAASFFSASCVPCADQSSFPK	A0A452FJF9	Serotransferrin(predicted) OS=Capra hircus OX=9925 GN=TF PE=4 SV=1	4	559.502	3.7981	8.3138e-08	103.71	yes	1.11	0.828	1.692	1.273	0.914	0.553	0.826	0.936	1.033	0.836
30	AAASTDYYKR	A0A452DWD8	Pyruvate dehydrogenase E1 component subunit alpha(predicted) OS=Capra hircus OX=9925 GN=PDHA2 PE=4 SV=1	3	382.524	2.4502	0.02804	48.284	yes	0.98	0.797	0.558	0.725	0.727	0.889	1.064	0.774	0.951	2.534
31	AAATYEHMK	A0A452EN76	dehydrogenase/reductase SDR family member 11(predicted) OS=Capra hircus OX=9925 GN=DHRS11 PE=4 SV=1	3	341.164	2.8913	0.00075369	101.72	yes	0.887	0.86	0.773	0.926	1.136	1.262	1.249	0.864	1.012	1.031
32	AAATYEHMK	A0A452EN76	dehydrogenase/reductase SDR family member 11(predicted) OS=Capra hircus OX=9925 GN=DHRS11 PE=4 SV=1	2	511.242		3.1793e-05	107.79	yes	NA	NA	NA	NA	NA	NA	NA	NA	NA	NA
33	AAAVLPVLDLAQR	A0A452ERM8	NADH dehydrogenase [ubiquinone] flavoprotein 2, mitochondrial(predicted) OS=Capra hircus OX=9925 GN=NDUFV2 PE=4 SV=1	2	668.901	3.9658	1.43e-11	124.89	yes	1.511	1.069	0.803	1.472	1.133	0.831	0.603	0.635	0.82	1.123
34	AAAVLPVLDLAQR	A0A452ERM8	NADH dehydrogenase [ubiquinone] flavoprotein 2, mitochondrial(predicted) OS=Capra hircus OX=9925 GN=NDUFV2 PE=4 SV=1	3	446.27	3.6687	0.026248	46.159	yes	NA	NA	NA	NA	NA	NA	NA	NA	NA	NA
35	AACLPLPGYR	A0A452DVP7	Lymphocyte cytosolic protein 1(predicted) OS=Capra hircus OX=9925 GN=LCP1 PE=4 SV=1	2	559.295	3.4524	0.00026389	109.71	yes	0.686	0.908	0.693	0.779	1.381	1.447	1.025	0.643	0.945	1.494
36	AACLPLPGYR	A0A452DVP7	Lymphocyte cytosolic protein 1(predicted) OS=Capra hircus OX=9925 GN=LCP1 PE=4 SV=1	2	559.295	3.6069	0.012629	63.816	yes	0.747	0.992	0.82	0.873	1.213	1.095	1.037	0.784	1.028	1.411
37	AACNCQGKIY	D6PX62	Cysteine-rich secretory protein 3 OS=Capra hircus OX=9925 GN=Crisp3 PE=2 SV=1	2	592.763	2.4868	0.0014568	87.258	yes	NA	NA	NA	NA	NA	NA	NA	NA	NA	NA
38	AACQDMGYR	A0A452FYA6	Transmembrane protease serine 2 (Fragment)(predicted) OS=Capra hircus OX=9925 GN=TMPRSS2 PE=4 SV=1	2	536.221	2.672	0.0034014	89.679	yes	1.004	1.043	0.742	1.096	0.984	0.62	0.809	1.007	1.489	1.205
39	AADAMAHVAGFTVAHDVSAR	A0A452FAL7	Fumarylacetoacetate hydrolase domain-containing protein 2(predicted) OS=Capra hircus OX=9925 GN=FAHD2A PE=4 SV=1	4	499.997	2.7285	1.7791e-31	143.57	yes	1.134	0.942	0.936	1.046	1.12	0.766	1.18	0.973	0.934	0.969
40	AADAMAHVAGFTVAHDVSAR	A0A452FAL7	Fumarylacetoacetate hydrolase domain-containing protein 2(predicted) OS=Capra hircus OX=9925 GN=FAHD2A PE=4 SV=1	3	666.327	3.3294	0.00019649	64.538	yes	0.953	1.106	1.146	0.945	1.078	0.947	0.893	0.613	1.464	0.855
41	AADDDRPSWR	A0A452EWF9	Eukaryotic translation initiation factor 3 subunit A(predicted) OS=Capra hircus OX=9925 GN=EIF3A PE=4 SV=1	3	396.851	1.5415	0.0038321	65.695	yes	1.012	0.707	0.656	1.216	0.693	1.002	1.328	0.82	1.262	1.303
42	AADETWEPFASGK	A0A452E2C0	Transthyretin(predicted) OS=Capra hircus OX=9925 GN=TTR PE=4 SV=1	3	470.217	2.9902	4.8138e-06	92.792	yes	0.986	1.122	1.39	0.971	1.02	0.797	0.85	1.131	0.972	0.762
43	AADETWEPFASGK	A0A452E2C0	Transthyretin(predicted) OS=Capra hircus OX=9925 GN=TTR PE=4 SV=1	2	704.823	3.2038	1.6679e-30	168.89	yes	1.022	0.954	1.632	1.108	0.993	0.738	0.878	1.11	0.86	0.705
44	AADETWEPFASGK	A0A452E2C0	Transthyretin(predicted) OS=Capra hircus OX=9925 GN=TTR PE=4 SV=1	3	470.217	2.7004	8.6931e-08	95.417	yes	NA	NA	NA	NA	NA	NA	NA	NA	NA	NA
45	AADIDQEVK	A0A452E570	cullin-associated NEDD8-dissociated protein 1(predicted) OS=Capra hircus OX=9925 GN=CAND1 PE=4 SV=1	2	494.751	3.6824	0.0026174	99.283	yes	NA	NA	NA	NA	NA	NA	NA	NA	NA	NA
46	AADIDQEVK	A0A452E570	cullin-associated NEDD8-dissociated protein 1(predicted) OS=Capra hircus OX=9925 GN=CAND1 PE=4 SV=1	3	330.17	2.9379	0.0014221	82.287	yes	1.411	0.916	0.829	1.423	0.944	1.057	0.896	0.703	0.923	0.898
47	AADKLIQDLDANHDGR	A0A452G7N6	Protein S100(predicted) OS=Capra hircus OX=9925 GN=S100A16 PE=4 SV=1	4	438.968	3.5156	6.0185e-08	105.9	yes	0.961	1.133	0.929	0.925	1.058	0.952	0.791	1.262	0.848	1.141
48	AADKLIQDLDANHDGR	A0A452G7N6	Protein S100(predicted) OS=Capra hircus OX=9925 GN=S100A16 PE=4 SV=1	4	438.722	2.7331	1.9145e-11	117.18	yes	0.676	0.823	0.715	0.657	1.053	1.582	0.777	0.96	1.55	1.208
49	AADLLVNPLDPR	A0A452FT36	SRSF protein kinase 2(predicted) OS=Capra hircus OX=9925 GN=SRPK2 PE=4 SV=1	2	647.362	3.3522	0.00145	78.744	yes	0.989	0.865	0.785	1.049	0.776	1.011	1.168	0.891	1.245	1.221
50	AAEAAMQTLLR	A0A452ECP5	Maestro heat like repeat family member 2B(predicted) OS=Capra hircus OX=9925 PE=4 SV=1	2	587.816	4.4347	2.9965e-09	140.45	yes	0.554	0.761	1	0.603	0.713	0.975	1.566	0.995	1.196	1.638
51	AAEAAMQTLLR	A0A452ECP5	Maestro heat like repeat family member 2B(predicted) OS=Capra hircus OX=9925 PE=4 SV=1	3	392.213	3.05	0.00052684	80.24	yes	NA	NA	NA	NA	NA	NA	NA	NA	NA	NA
52	AAEAAMQTLLRR	A0A452ECP5	Maestro heat like repeat family member 2B(predicted) OS=Capra hircus OX=9925 PE=4 SV=1	3	444.247	3.5122	3.2073e-19	154.36	yes	0.415	0.494	NA	NA	0.386	0.917	1.485	0.758	1.042	2.502
53	AAEDVLVK	A0A452EH23	Calsyntenin 1(predicted) OS=Capra hircus OX=9925 GN=CLSTN1 PE=4 SV=1	3	282.164	2.3769	0.049903	47.082	yes	NA	NA	NA	NA	NA	NA	NA	NA	NA	NA
54	AAEMLLFGK	A0A452ETZ2	Peroxisomal 3,2-trans-enoyl-CoA isomerase (Fragment)(predicted) OS=Capra hircus OX=9925 GN=ECI2 PE=4 SV=1	2	490.268	4.4062	0.0035802	87.258	yes	NA	NA	NA	NA	NA	NA	NA	NA	NA	NA
55	AAEMLLFGK	A0A452ETZ2	Peroxisomal 3,2-trans-enoyl-CoA isomerase (Fragment)(predicted) OS=Capra hircus OX=9925 GN=ECI2 PE=4 SV=1	3	327.181	3.1748	0.014067	57.59	yes	1.106	0.911	0.506	0.819	0.831	1.76	0.693	0.679	1.045	1.65
56	AAEQVVQEALR	A0A452FM75	Huntingtin-interacting protein 1 (Fragment)(predicted) OS=Capra hircus OX=9925 GN=HIP1 PE=4 SV=1	2	607.33	2.8476	0.00053646	86.756	yes	0.824	0.834	0.893	0.923	0.813	1.104	1.56	0.995	0.947	1.106
57	AAEQVVQEALR	A0A452FM75	Huntingtin-interacting protein 1 (Fragment)(predicted) OS=Capra hircus OX=9925 GN=HIP1 PE=4 SV=1	2	607.33	3.3828	0.00013346	99.941	yes	0.855	0.861	0.726	1.057	0.699	0.854	1.324	1.388	0.792	1.444
58	AAEQVVQEALR	A0A452FM75	Huntingtin-interacting protein 1 (Fragment)(predicted) OS=Capra hircus OX=9925 GN=HIP1 PE=4 SV=1	3	405.223	2.4828	0.016609	48.115	yes	1.08	1.058	1.313	1.08	1.039	0.713	0.927	0.881	1.061	0.849
59	AAEQYTPR	A0A452F5I4	Fatty acid synthase OS=Capra hircus OX=9925 GN=FASN PE=4 SV=1	2	468.233	1.9355	0.021877	76.221	yes	0.492	0.573	0.789	0.517	0.537	1.666	1.169	2.179	1.133	0.945
60	AAETLGR	A0A452F4X2	Maestro heat-like repeat-containing protein family member 1(predicted) OS=Capra hircus OX=9925 GN=MROH1 PE=4 SV=1	2	359.198	1.44	0.0115	105.04	yes	0.57	0.563	0.472	0.426	0.538	1.429	1.838	0.854	1.251	2.058
61	AAETLGR	A0A452F4X2	Maestro heat-like repeat-containing protein family member 1(predicted) OS=Capra hircus OX=9925 GN=MROH1 PE=4 SV=1	2	359.198	0.78924	0.021868	92.187	yes	0.494	0.549	0.539	0.463	0.559	1.413	1.868	0.857	1.27	1.989
62	AAFDDAIAELDTLSEESYK	A0A452FS72	Putative multifunctional chaperone 14-3-3 family (Fragment)(predicted) OS=Capra hircus OX=9925 GN=YWHAE PE=4 SV=1	3	696.66	3.5979	0.0037779	52.814	yes	NA	NA	NA	NA	NA	NA	NA	NA	NA	NA
63	AAFEYIITAK	A0A452DLQ9	Enoyl-CoA hydratase, mitochondrial(predicted) OS=Capra hircus OX=9925 GN=ECHS1 PE=4 SV=1	3	376.21	4.4124	0.0081618	57.785	yes	1.131	0.878	0.805	0.937	1.093	0.99	1.114	0.616	0.939	1.497
64	AAFGGHLEAVEVLLK	A0A452DK08	putative IQ motif and ankyrin repeat domain-containing protein LOC642574 homolog(predicted) OS=Capra hircus OX=9925 GN=IQANK1 PE=4 SV=1	3	518.628	4.6763	0.00011466	79.614	yes	NA	NA	NA	NA	NA	NA	NA	NA	NA	NA
66	AAFPVLDMVDLQR	A0A452EJE6	Cat eye syndrome chromosome region, candidate 5 isoform 2(predicted) OS=Capra hircus OX=9925 GN=HDHD5 PE=4 SV=1	2	737.89	3.6178	0.0027285	70.438	yes	0.928	1.102	0.712	0.989	1.258	1.076	1.002	0.687	1.112	1.135
67	AAGAEEYAQQDVVKK	A0A452DU53	2',3'-cyclic-nucleotide 3'-phosphodiesterase(predicted) OS=Capra hircus OX=9925 GN=CNP PE=4 SV=1	3	536.274	3.6151	4.1268e-16	124.68	yes	0.909	1.07	0.654	0.823	1.329	1.337	1.069	0.591	1.126	1.091
68	AAGAEEYAQQDVVKK	A0A452DU53	2',3'-cyclic-nucleotide 3'-phosphodiesterase(predicted) OS=Capra hircus OX=9925 GN=CNP PE=4 SV=1	4	402.457	3.2923	4.262e-11	111.12	yes	NA	NA	NA	NA	NA	NA	NA	NA	NA	NA
69	AAGCDFTNVVK	P80601	2-iminobutanoate/2-iminopropanoate deaminase OS=Capra hircus OX=9925 GN=RIDA PE=1 SV=3	2	591.285	2.7895	3.0739e-11	147.63	yes	1.141	1.11	0.867	1.247	1.075	1.287	1.042	0.507	0.826	0.897
70	AAGCDFTNVVK	P80601	2-iminobutanoate/2-iminopropanoate deaminase OS=Capra hircus OX=9925 GN=RIDA PE=1 SV=3	3	394.525	2.5963	8.0985e-07	125.75	yes	NA	NA	NA	NA	NA	NA	NA	NA	NA	NA
71	AAGCDFTNVVK	P80601	2-iminobutanoate/2-iminopropanoate deaminase OS=Capra hircus OX=9925 GN=RIDA PE=1 SV=3	2	591.285	4.154	6.642e-11	142.1	yes	1.174	1.038	0.868	1.235	1.193	1.26	0.989	0.593	0.779	0.873
72	AAGCDIPVASVATGFPAGQTHLK	A0A452GB49	Deoxyribose-phosphate aldolase(predicted) OS=Capra hircus OX=9925 GN=DERA PE=4 SV=1	3	756.72	2.5396	5.6244e-25	131.41	yes	0.889	0.832	0.842	0.853	0.792	0.965	1.021	0.704	1.723	1.379
73	AAGDGDCGSTHSR	A0A452FQK7	TKFC(predicted) OS=Capra hircus OX=9925 GN=TKFC PE=4 SV=1	3	430.842	1.5926	4.6763e-31	169.6	yes	0.659	0.828	0.418	0.632	1.042	1.432	1.356	0.746	0.984	1.903
74	AAGEVMEPANLLAEEKDEDLLFE	A0A452FCL2	V-type proton ATPase subunit D(predicted) OS=Capra hircus OX=9925 GN=ATP6V1D PE=4 SV=1	3	845.072	2.3876	3.1243e-05	67.194	yes	0.887	0.807	0.851	0.609	0.754	1.291	1.379	1.039	1.279	1.103
75	AAGEVMEPANLLAEEKDEDLLFE	A0A452FCL2	V-type proton ATPase subunit D(predicted) OS=Capra hircus OX=9925 GN=ATP6V1D PE=4 SV=1	4	634.056	2.4205	0.00602	40.137	yes	0.9	1.089	0.911	0.743	0.801	1.071	1.153	0.958	1.181	1.194
76	AAGFISVLK	A0A452E471	Solute carrier family 2, facilitated glucose transporter member 5(predicted) OS=Capra hircus OX=9925 GN=LOC102178379 PE=4 SV=1	2	453.276	5.2896	0.0013264	111.61	no	1.295	1.349	1.324	1.209	1.367	0.669	0.606	0.534	0.813	0.834
77	AAGFISVLK	A0A452E471	Solute carrier family 2, facilitated glucose transporter member 5(predicted) OS=Capra hircus OX=9925 GN=LOC102178379 PE=4 SV=1	2	453.276	5.5902	0.00041141	120.99	no	1.255	1.215	1.238	1.202	1.368	0.772	0.678	0.524	0.844	0.903
[truncated: 31,417 more rows]

## Sheet: Statistics
Peptide length	Number of peptides
7	1482
8	1913
9	1862
10	1634
11	1444
12	1180
13	1038
14	921
15	833
16	668
17	587
18	433
19	356
20	325
21	237
22	190
23	157
24	102
25	79
[truncated: 13 more rows]

## Sheet: Protein Ratio
-2.6	1
[truncated: 44 more rows]
