# Supplementary material for: The characteristics of proteome and metabolome associated with contrasting sperm motility in goat seminal plasma
Source: Sci Rep. 2021 Jul 30;11:15562. doi: 10.1038/s41598-021-95138-9 (PMC8324791; doi:10.1038/s41598-021-95138-9)
Supplement: Supplementary file 5 — Supplementary Information 5. [file 41598_2021_95138_MOESM5_ESM.xlsx]

## Sheet: Diff distribution
Compared sample name	Up-regulated	Down-regulated
G/B	175	274

## Sheet: GvsB
Protein accession	Protein description	G/B Ratio	Regulated Type	G/B P value	Gene name	MW [kDa]	Coverage [%]	Peptides	PSMs	Unique peptides	B1	B2	B3	B4	B5	G1	G2	G3	G4	G5	Subcellular localization	Biological Process	Cellular Component	Molecular Function	KEGG KO No.	KEGG Gene	KEGG pathway	Pfam ID	Domain description
A0A452EK88	Beta-galactosidase(predicted) OS=Capra hircus OX=9925 GN=GLB1 PE=4 SV=1	1.814	Up	0.0067152	GLB1	72.641	30.8	19	83	18	0.748	0.726	0.644	0.747	0.781	1.514	1.817	1.057	1.133	1.094	extracellular	GO:0001775 cell activation; GO:0002252 immune effector process; GO:0002263 cell activation involved in immune response; GO:0002274 myeloid leukocyte activation; GO:0002275 myeloid cell activation involved in immune response; GO:0002283 neutrophil activation involved in immune response; GO:0002366 leukocyte activation involved in immune response; GO:0002376 immune system process; GO:0002443 leukoc…	GO:0000323 lytic vacuole; GO:0005576 extracellular region; GO:0005615 extracellular space; GO:0005622 intracellular; GO:0005623 cell; GO:0005737 cytoplasm; GO:0005764 lysosome; GO:0005766 primary lysosome; GO:0005773 vacuole; GO:0005775 vacuolar lumen; GO:0005794 Golgi apparatus; GO:0012505 endomembrane system; GO:0030141 secretory granule; GO:0031410 cytoplasmic vesicle; GO:0031974 membrane-encl…	GO:0003824 catalytic activity; GO:0004308 exo-alpha-sialidase activity; GO:0004553 hydrolase activity, hydrolyzing O-glycosyl compounds; GO:0004565 beta-galactosidase activity; GO:0005488 binding; GO:0005515 protein binding; GO:0015925 galactosidase activity; GO:0016787 hydrolase activity; GO:0016798 hydrolase activity, acting on glycosyl bonds; GO:0016936 galactoside binding; GO:0016997 alpha-si…	K12309	GLB1, ELNR1; beta-galactosidase [EC:3.2.1.23]	chx00052 Galactose metabolism - Capra hircus (goat); chx00511 Other glycan degradation - Capra hircus (goat); chx00531 Glycosaminoglycan degradation - Capra hircus (goat); chx00600 Sphingolipid metabolism - Capra hircus (goat); chx00604 Glycosphingolipid biosynthesis - ganglio series - Capra hircus (goat); chx01100 Metabolic pathways - Capra hircus (goat); chx04142 Lysosome - Capra hircus (goat);	PF01301; PF13364	Glycosyl hydrolases family 35; Beta-galactosidase jelly roll domain
A0A452FV50	trafficking protein particle complex subunit 13 isoform X2(predicted) OS=Capra hircus OX=9925 GN=TRAPPC13 PE=4 SV=1	2.413	Up	0.00028246	TRAPPC13	46.015	2.2	1	1	1	0.562	0.585	0.513	0.733	0.632	1.257	2.06	0.957	1.449	1.577	cytoplasm	GO:0065007 biological regulation; GO:0065009 regulation of molecular function;	GO:0005622 intracellular; GO:0005623 cell; GO:0005737 cytoplasm; GO:0005829 cytosol; GO:0044424 intracellular part; GO:0044444 cytoplasmic part; GO:0044464 cell part;	GO:0005085 guanyl-nucleotide exchange factor activity; GO:0005088 Ras guanyl-nucleotide exchange factor activity; GO:0005488 binding; GO:0005515 protein binding; GO:0017016 Ras GTPase binding; GO:0017112 Rab guanyl-nucleotide exchange factor activity; GO:0017137 Rab GTPase binding; GO:0019899 enzyme binding; GO:0031267 small GTPase binding; GO:0051020 GTPase binding; GO:0098772 molecular function…	K20310	TRAPPC13; trafficking protein particle complex subunit 13
A0A452F1M8	Putative adenylate kinase 7 (Fragment)(predicted) OS=Capra hircus OX=9925 GN=AK7 PE=4 SV=1	0.59	Down	0.00034242	AK7	83.045	9.3	6	6	6	1.602	1.122	1.015	1.367	1.367	0.805	0.759	0.683	0.822	0.751	cytoplasm	GO:0000003 reproduction; GO:0000226 microtubule cytoskeleton organization; GO:0001578 microtubule bundle formation; GO:0002376 immune system process; GO:0002437 inflammatory response to antigenic stimulus; GO:0003341 cilium movement; GO:0003351 epithelial cilium movement; GO:0006139 nucleobase-containing compound metabolic process; GO:0006165 nucleoside diphosphate phosphorylation; GO:0006725 cel…	GO:0005622 intracellular; GO:0005623 cell; GO:0005737 cytoplasm; GO:0005829 cytosol; GO:0044424 intracellular part; GO:0044444 cytoplasmic part; GO:0044464 cell part;	GO:0003824 catalytic activity; GO:0004017 adenylate kinase activity; GO:0004127 cytidylate kinase activity; GO:0004550 nucleoside diphosphate kinase activity; GO:0016301 kinase activity; GO:0016740 transferase activity; GO:0016772 transferase activity, transferring phosphorus-containing groups; GO:0016776 phosphotransferase activity, phosphate group as acceptor; GO:0019205 nucleobase-containing c…				PF00406	Adenylate kinase
A0A452FSK9	ATP-citrate synthase(predicted) OS=Capra hircus OX=9925 GN=ACLY PE=4 SV=1	1.519	Up	0.027642	ACLY	120.9	34.7	35	57	35	0.867	0.823	0.775	0.87	0.724	1.305	1.728	0.876	1.104	1.151	cytoplasm	GO:0001775 cell activation; GO:0002252 immune effector process; GO:0002263 cell activation involved in immune response; GO:0002274 myeloid leukocyte activation; GO:0002275 myeloid cell activation involved in immune response; GO:0002283 neutrophil activation involved in immune response; GO:0002366 leukocyte activation involved in immune response; GO:0002376 immune system process; GO:0002443 leukoc…	GO:0000323 lytic vacuole; GO:0005576 extracellular region; GO:0005622 intracellular; GO:0005623 cell; GO:0005634 nucleus; GO:0005654 nucleoplasm; GO:0005737 cytoplasm; GO:0005764 lysosome; GO:0005766 primary lysosome; GO:0005773 vacuole; GO:0005775 vacuolar lumen; GO:0005829 cytosol; GO:0005886 plasma membrane; GO:0009346 citrate lyase complex; GO:0012505 endomembrane system; GO:0016020 membrane;…	GO:0000166 nucleotide binding; GO:0003824 catalytic activity; GO:0003878 ATP citrate synthase activity; GO:0005488 binding; GO:0005524 ATP binding; GO:0008144 drug binding; GO:0016740 transferase activity; GO:0016746 transferase activity, transferring acyl groups; GO:0017076 purine nucleotide binding; GO:0030554 adenyl nucleotide binding; GO:0032553 ribonucleotide binding; GO:0032555 purine ribon…				PF02629; PF00549; PF00285	CoA binding domain; CoA-ligase; Citrate synthase
A0A452G316	Calpain-7-like protein(predicted) OS=Capra hircus OX=9925 GN=ADGB PE=4 SV=1	0.436	Down	0.00053549	ADGB	187.06	3.3	4	4	4	1.57	1.427	0.911	1.28	1.946	0.6	0.497	0.768	0.567	0.677	nucleus	GO:0006508 proteolysis; GO:0006807 nitrogen compound metabolic process; GO:0008152 metabolic process; GO:0019538 protein metabolic process; GO:0043170 macromolecule metabolic process; GO:0044238 primary metabolic process; GO:0071704 organic substance metabolic process; GO:1901564 organonitrogen compound metabolic process;	GO:0005622 intracellular; GO:0005623 cell; GO:0005737 cytoplasm; GO:0044424 intracellular part; GO:0044464 cell part;	GO:0003824 catalytic activity; GO:0004175 endopeptidase activity; GO:0004197 cysteine-type endopeptidase activity; GO:0004198 calcium-dependent cysteine-type endopeptidase activity; GO:0008233 peptidase activity; GO:0008234 cysteine-type peptidase activity; GO:0016787 hydrolase activity; GO:0070011 peptidase activity, acting on L-amino acid peptides;
A0A452EBP2	Protein S100(predicted) OS=Capra hircus OX=9925 GN=S100A2 PE=4 SV=1	0.598	Down	0.025136	S100A2	11.024	19.4	2	2	2	0.859	1.531	1.589	1	1.555	0.851	0.494	0.706	0.707	1.15	cytoplasm	GO:0001667 ameboidal-type cell migration; GO:0006928 movement of cell or subcellular component; GO:0009987 cellular process; GO:0010631 epithelial cell migration; GO:0016477 cell migration; GO:0032501 multicellular organismal process; GO:0040011 locomotion; GO:0043542 endothelial cell migration; GO:0048870 cell motility; GO:0051179 localization; GO:0051674 localization of cell; GO:0090130 tissue …		GO:0005488 binding; GO:0005509 calcium ion binding; GO:0005515 protein binding; GO:0042802 identical protein binding; GO:0043167 ion binding; GO:0043169 cation binding; GO:0046872 metal ion binding;				PF01023	S-100/ICaBP type calcium binding domain
A0A452FC14	Caltrin(predicted) OS=Capra hircus OX=9925 GN=LOC102179414 PE=4 SV=1	2.414	Up	0.007865	LOC102179414	8.9454	49.4	6	130	6	0.493	0.632	0.928	0.382	0.463	0.69	1.021	1.836	1.686	1.763	extracellular	GO:0007154 cell communication; GO:0007165 signal transduction; GO:0007186 G-protein coupled receptor signaling pathway; GO:0007218 neuropeptide signaling pathway; GO:0007267 cell-cell signaling; GO:0007586 digestion; GO:0007610 behavior; GO:0007631 feeding behavior; GO:0008283 cell proliferation; GO:0009605 response to external stimulus; GO:0009966 regulation of signal transduction; GO:0009987 ce…	GO:0005576 extracellular region; GO:0005615 extracellular space; GO:0044421 extracellular region part;	GO:0001664 G-protein coupled receptor binding; GO:0005102 receptor binding; GO:0005179 hormone activity; GO:0005184 neuropeptide hormone activity; GO:0005488 binding; GO:0005515 protein binding; GO:0030545 receptor regulator activity; GO:0031841 neuropeptide Y receptor binding; GO:0048018 receptor agonist activity; GO:0071855 neuropeptide receptor binding; GO:0098772 molecular function regulator;
A0A452EQ00	3-phosphoinositide-dependent protein kinase 1-like(predicted) OS=Capra hircus OX=9925 GN=PDPK1 PE=4 SV=1	1.558	Up	0.0023618	PDPK1	62.904	3.1	2	2	2	0.87	0.713	0.749	0.897	0.832	1.303	1.624	1.003	1.047	1.352	mitochondria	GO:0001775 cell activation; GO:0001932 regulation of protein phosphorylation; GO:0001933 negative regulation of protein phosphorylation; GO:0001934 positive regulation of protein phosphorylation; GO:0001936 regulation of endothelial cell proliferation; GO:0001938 positive regulation of endothelial cell proliferation; GO:0002218 activation of innate immune response; GO:0002220 innate immune respon…	GO:0005622 intracellular; GO:0005623 cell; GO:0005634 nucleus; GO:0005654 nucleoplasm; GO:0005737 cytoplasm; GO:0005829 cytosol; GO:0005886 plasma membrane; GO:0005912 adherens junction; GO:0005924 cell-substrate adherens junction; GO:0005925 focal adhesion; GO:0016020 membrane; GO:0030054 cell junction; GO:0030055 cell-substrate junction; GO:0031974 membrane-enclosed lumen; GO:0031981 nuclear lu…	GO:0003824 catalytic activity; GO:0004672 protein kinase activity; GO:0004674 protein serine/threonine kinase activity; GO:0004676 3-phosphoinositide-dependent protein kinase activity; GO:0005488 binding; GO:0005515 protein binding; GO:0008047 enzyme activator activity; GO:0016004 phospholipase activator activity; GO:0016301 kinase activity; GO:0016740 transferase activity; GO:0016772 transferase…	K06276	PDPK1; 3-phosphoinositide dependent protein kinase-1 [EC:2.7.11.1]	chx01524 Platinum drug resistance - Capra hircus (goat); chx03320 PPAR signaling pathway - Capra hircus (goat); chx04068 FoxO signaling pathway - Capra hircus (goat); chx04071 Sphingolipid signaling pathway - Capra hircus (goat); chx04140 Autophagy - animal - Capra hircus (goat); chx04150 mTOR signaling pathway - Capra hircus (goat); chx04151 PI3K-Akt signaling pathway - Capra hircus (goat); chx0…	PF00069	Protein kinase domain
A0A452G4S9	Transmembrane protein 190(predicted) OS=Capra hircus OX=9925 GN=TMEM190 PE=4 SV=1	0.278	Down	1.0045e-06	TMEM190	19.571	20.1	4	16	4	1.8	1.247	1.552	1.678	1.406	0.328	0.462	0.53	0.443	0.372	extracellular	GO:0002244 hematopoietic progenitor cell differentiation; GO:0002376 immune system process; GO:0002520 immune system development; GO:0007275 multicellular organism development; GO:0009987 cellular process; GO:0030097 hemopoiesis; GO:0030154 cell differentiation; GO:0032501 multicellular organismal process; GO:0032502 developmental process; GO:0048513 animal organ development; GO:0048534 hematopoi…	GO:0001669 acrosomal vesicle; GO:0002079 inner acrosomal membrane; GO:0002080 acrosomal membrane; GO:0005622 intracellular; GO:0005623 cell; GO:0005737 cytoplasm; GO:0012505 endomembrane system; GO:0012506 vesicle membrane; GO:0016020 membrane; GO:0030141 secretory granule; GO:0030659 cytoplasmic vesicle membrane; GO:0030667 secretory granule membrane; GO:0031090 organelle membrane; GO:0031410 cy…	GO:0005488 binding; GO:0005515 protein binding; GO:0043621 protein self-association;
A0A452ET62	Fibrous sheath interacting protein 2(predicted) OS=Capra hircus OX=9925 GN=FSIP2 PE=4 SV=1	0.477	Down	2.3255e-06	FSIP2	782.52	2.3	15	18	15	1.468	1.325	1.1	1.285	1.563	0.591	0.618	0.634	0.668	0.706	cytoplasm		GO:0005622 intracellular; GO:0005623 cell; GO:0005737 cytoplasm; GO:0005739 mitochondrion; GO:0005929 cilium; GO:0031514 motile cilium; GO:0042995 cell projection; GO:0043226 organelle; GO:0043227 membrane-bounded organelle; GO:0043229 intracellular organelle; GO:0043231 intracellular membrane-bounded organelle; GO:0044424 intracellular part; GO:0044444 cytoplasmic part; GO:0044464 cell part;
A0A452FNL7	MS4A13 protein(predicted) OS=Capra hircus OX=9925 PE=4 SV=1	0.584	Down	0.00092361	---	96.691	7	6	7	6	1.461	1.011	1.325	1.493	1.18	0.582	0.747	0.919	0.826	0.705	plasma membrane				K22192	MS4A14; membrane-spanning 4-domains subfamily A member 14
A0A452DZE4	Diazepam-binding inhibitor-like 5(predicted) OS=Capra hircus OX=9925 GN=LOC102175985 PE=4 SV=1	2.181	Up	0.0037634	LOC102175985	9.7883	54	6	14	6	0.84	0.531	0.661	0.808	0.461	2.337	1.525	1.193	1.062	1.082	cytoplasm	GO:0000003 reproduction; GO:0006139 nucleobase-containing compound metabolic process; GO:0006163 purine nucleotide metabolic process; GO:0006637 acyl-CoA metabolic process; GO:0006725 cellular aromatic compound metabolic process; GO:0006732 coenzyme metabolic process; GO:0006753 nucleoside phosphate metabolic process; GO:0006790 sulfur compound metabolic process; GO:0006793 phosphorus metabolic p…	GO:0005622 intracellular; GO:0005623 cell; GO:0005737 cytoplasm; GO:0044424 intracellular part; GO:0044464 cell part;					PF00887	Acyl CoA binding protein
A0A452E471	Solute carrier family 2, facilitated glucose transporter member 5(predicted) OS=Capra hircus OX=9925 GN=LOC102178379 PE=4 SV=1	0.536	Down	0.0031847	LOC102178379	49.364	7.2	4	12	2	1.394	1.329	1.296	1.297	1.462	0.863	0.62	0.529	0.73	0.89	plasma membrane	GO:0001775 cell activation; GO:0002252 immune effector process; GO:0002263 cell activation involved in immune response; GO:0002274 myeloid leukocyte activation; GO:0002275 myeloid cell activation involved in immune response; GO:0002283 neutrophil activation involved in immune response; GO:0002366 leukocyte activation involved in immune response; GO:0002376 immune system process; GO:0002443 leukoc…	GO:0005622 intracellular; GO:0005623 cell; GO:0005737 cytoplasm; GO:0005886 plasma membrane; GO:0005887 integral component of plasma membrane; GO:0012505 endomembrane system; GO:0012506 vesicle membrane; GO:0016020 membrane; GO:0016021 integral component of membrane; GO:0016324 apical plasma membrane; GO:0030141 secretory granule; GO:0030659 cytoplasmic vesicle membrane; GO:0030667 secretory gran…	GO:0005215 transporter activity; GO:0005353 fructose transmembrane transporter activity; GO:0005355 glucose transmembrane transporter activity; GO:0005488 binding; GO:0015144 carbohydrate transmembrane transporter activity; GO:0015145 monosaccharide transmembrane transporter activity; GO:0015149 hexose transmembrane transporter activity; GO:0022857 transmembrane transporter activity; GO:0030246 c…	K08143	SLC2A5, GLUT5; MFS transporter, SP family, solute carrier family 2 (facilitated glucose/fructose transporter), member 5	chx04973 Carbohydrate digestion and absorption - Capra hircus (goat);
A0A452EVM2	Angiotensin-converting enzyme(predicted) OS=Capra hircus OX=9925 GN=ACE2 PE=4 SV=1	0.598	Down	0.0155991	ACE2	86.427	4	3	3	3	1.671	1.053	1.147	1.698	0.972	0.757	0.759	0.846	0.818	0.732	cytoplasm	GO:0000003 reproduction; GO:0001817 regulation of cytokine production; GO:0001932 regulation of protein phosphorylation; GO:0001933 negative regulation of protein phosphorylation; GO:0001976 neurological system process involved in regulation of systemic arterial blood pressure; GO:0001990 regulation of systemic arterial blood pressure by hormone; GO:0001991 regulation of systemic arterial blood p…	GO:0005576 extracellular region; GO:0005615 extracellular space; GO:0005622 intracellular; GO:0005623 cell; GO:0005737 cytoplasm; GO:0005886 plasma membrane; GO:0005903 brush border; GO:0009986 cell surface; GO:0016020 membrane; GO:0031253 cell projection membrane; GO:0031526 brush border membrane; GO:0042995 cell projection; GO:0044421 extracellular region part; GO:0044424 intracellular part; GO…	GO:0001618 virus receptor activity; GO:0003824 catalytic activity; GO:0004175 endopeptidase activity; GO:0004180 carboxypeptidase activity; GO:0004181 metallocarboxypeptidase activity; GO:0005488 binding; GO:0008233 peptidase activity; GO:0008235 metalloexopeptidase activity; GO:0008237 metallopeptidase activity; GO:0008238 exopeptidase activity; GO:0008270 zinc ion binding; GO:0016787 hydrolase …	K09708	ACE2, ACEH; angiotensin-converting enzyme 2 [EC:3.4.17.23]	chx04614 Renin-angiotensin system - Capra hircus (goat); chx04974 Protein digestion and absorption - Capra hircus (goat);
A0A452G830	Prostaglandin reductase 1(predicted) OS=Capra hircus OX=9925 GN=PTGR1 PE=4 SV=1	2.092	Up	0.022463	PTGR1	35.675	23.1	9	17	9	0.698	0.679	0.656	0.673	0.601	2.117	1.465	0.77	0.94	1.627	cytoplasm	GO:0006082 organic acid metabolic process; GO:0006690 icosanoid metabolic process; GO:0006691 leukotriene metabolic process; GO:0008152 metabolic process; GO:0009987 cellular process; GO:0019752 carboxylic acid metabolic process; GO:0042221 response to chemical; GO:0042493 response to drug; GO:0043436 oxoacid metabolic process; GO:0044237 cellular metabolic process; GO:0044281 small molecule meta…	GO:0005622 intracellular; GO:0005623 cell; GO:0005737 cytoplasm; GO:0005829 cytosol; GO:0044424 intracellular part; GO:0044444 cytoplasmic part; GO:0044464 cell part;	GO:0003824 catalytic activity; GO:0016491 oxidoreductase activity; GO:0016614 oxidoreductase activity, acting on CH-OH group of donors; GO:0016616 oxidoreductase activity, acting on the CH-OH group of donors, NAD or NADP as acceptor; GO:0036185 13-lipoxin reductase activity; GO:0097257 leukotriene B4 12-hydroxy dehydrogenase activity;	K13948	PTGR1, LTB4DH; prostaglandin reductase 1 [EC:1.3.1.74 1.3.1.48]
A0A452G544	Phospholipase DDHD1(predicted) OS=Capra hircus OX=9925 GN=DDHD1 PE=4 SV=1	1.781	Up	0.0079827	DDHD1	97.709	8.3	6	6	6	0.726	0.884	0.63	0.75	0.725	0.976	1.914	0.861	1.461	1.403	cytoplasm,nucleus	GO:0006996 organelle organization; GO:0007005 mitochondrion organization; GO:0009987 cellular process; GO:0010638 positive regulation of organelle organization; GO:0010821 regulation of mitochondrion organization; GO:0010822 positive regulation of mitochondrion organization; GO:0016043 cellular component organization; GO:0022603 regulation of anatomical structure morphogenesis; GO:0030382 sperm m…	GO:0005622 intracellular; GO:0005623 cell; GO:0005737 cytoplasm; GO:0005829 cytosol; GO:0044424 intracellular part; GO:0044444 cytoplasmic part; GO:0044464 cell part;	GO:0003824 catalytic activity; GO:0004620 phospholipase activity; GO:0016298 lipase activity; GO:0016787 hydrolase activity; GO:0016788 hydrolase activity, acting on ester bonds;	K13619	DDHD1; phospholipase DDHD1 [EC:3.1.1.-]
A0A452F577	Ubiquitin-associated domain-containing protein 1 (Fragment)(predicted) OS=Capra hircus OX=9925 GN=UBAC1 PE=4 SV=1	1.542	Up	0.0080791	UBAC1	45.126	7.5	3	4	3	0.841	0.921	0.698	0.896	0.718	1.356	1.292	0.821	1.297	1.518	mitochondria		GO:0005622 intracellular; GO:0005623 cell; GO:0005737 cytoplasm; GO:0005794 Golgi apparatus; GO:0005829 cytosol; GO:0005886 plasma membrane; GO:0012505 endomembrane system; GO:0016020 membrane; GO:0043226 organelle; GO:0043227 membrane-bounded organelle; GO:0043229 intracellular organelle; GO:0043231 intracellular membrane-bounded organelle; GO:0044424 intracellular part; GO:0044444 cytoplasmic p…		K12174	KPC2, UBAC1; Kip1 ubiquitination-promoting complex protein 2		PF00627	UBA/TS-N domain
A0A452FD51	26S proteasome non-ATPase regulatory subunit 9(predicted) OS=Capra hircus OX=9925 GN=PSMD9 PE=4 SV=1	1.562	Up	1.3271e-06	PSMD9	24.257	9.5	2	2	2	0.799	0.774	0.799	0.852	0.855	1.364	1.354	1.288	1.148	1.218	cytoplasm,nucleus	GO:0002791 regulation of peptide secretion; GO:0002792 negative regulation of peptide secretion; GO:0002793 positive regulation of peptide secretion; GO:0006355 regulation of transcription, DNA-templated; GO:0006357 regulation of transcription from RNA polymerase II promoter; GO:0006464 cellular protein modification process; GO:0006508 proteolysis; GO:0006511 ubiquitin-dependent protein catabolic…	GO:0000502 proteasome complex; GO:0005622 intracellular; GO:0005623 cell; GO:0005634 nucleus; GO:0005654 nucleoplasm; GO:0005737 cytoplasm; GO:0005829 cytosol; GO:0005838 proteasome regulatory particle; GO:0008540 proteasome regulatory particle, base subcomplex; GO:0022624 proteasome accessory complex; GO:0031974 membrane-enclosed lumen; GO:0031981 nuclear lumen; GO:0032991 macromolecular complex…	GO:0003712 transcription cofactor activity; GO:0003713 transcription coactivator activity; GO:0005488 binding; GO:0005515 protein binding; GO:0008022 protein C-terminus binding; GO:0008134 transcription factor binding; GO:0043425 bHLH transcription factor binding;	K06693	PSMD9; 26S proteasome non-ATPase regulatory subunit 9		PF13180	PDZ domain
A0A452DKX4	SERPINA3-6(predicted) OS=Capra hircus OX=9925 PE=4 SV=1	0.381	Down	0.0079373	---	12.357	29.6	3	5	1	2.827	0.83	1.117	1.88	0.916	0.589	0.489	0.693	0.658	0.454	extracellular	GO:0001775 cell activation; GO:0001894 tissue homeostasis; GO:0002237 response to molecule of bacterial origin; GO:0002252 immune effector process; GO:0002263 cell activation involved in immune response; GO:0002274 myeloid leukocyte activation; GO:0002275 myeloid cell activation involved in immune response; GO:0002283 neutrophil activation involved in immune response; GO:0002366 leukocyte activat…	GO:0000323 lytic vacuole; GO:0005576 extracellular region; GO:0005615 extracellular space; GO:0005622 intracellular; GO:0005623 cell; GO:0005634 nucleus; GO:0005737 cytoplasm; GO:0005764 lysosome; GO:0005766 primary lysosome; GO:0005773 vacuole; GO:0005775 vacuolar lumen; GO:0012505 endomembrane system; GO:0030141 secretory granule; GO:0031091 platelet alpha granule; GO:0031093 platelet alpha gra…	GO:0003676 nucleic acid binding; GO:0003677 DNA binding; GO:0004857 enzyme inhibitor activity; GO:0004866 endopeptidase inhibitor activity; GO:0004867 serine-type endopeptidase inhibitor activity; GO:0005488 binding; GO:0030234 enzyme regulator activity; GO:0030414 peptidase inhibitor activity; GO:0061134 peptidase regulator activity; GO:0061135 endopeptidase regulator activity; GO:0097159 organi…	K04525	SERPINA; serpin peptidase inhibitor, clade A		PF00079	Serpin (serine protease inhibitor)
A0A452G3K3	Spleen trypsin inhibitor I(predicted) OS=Capra hircus OX=9925 GN=LOC102177641 PE=4 SV=1	0.495	Down	0.00106264	LOC102177641	11.667	16.2	1	1	1	1.466	1.651	1.164	1.211	1.517	0.505	0.64	0.932	0.878	0.513	extracellular		GO:0005576 extracellular region;					PF00014	Kunitz/Bovine pancreatic trypsin inhibitor domain
A0A452FFV4	Acetyltransferase component of pyruvate dehydrogenase complex(predicted) OS=Capra hircus OX=9925 GN=DLAT PE=4 SV=1	0.433	Down	0.0106159	DLAT	67.359	8.6	5	10	5	1.602	0.82	1.926	1.652	0.944	0.561	0.542	0.694	0.61	0.597	mitochondria	GO:0006082 organic acid metabolic process; GO:0006084 acetyl-CoA metabolic process; GO:0006085 acetyl-CoA biosynthetic process; GO:0006086 acetyl-CoA biosynthetic process from pyruvate; GO:0006090 pyruvate metabolic process; GO:0006139 nucleobase-containing compound metabolic process; GO:0006163 purine nucleotide metabolic process; GO:0006164 purine nucleotide biosynthetic process; GO:0006637 acy…	GO:0005622 intracellular; GO:0005623 cell; GO:0005737 cytoplasm; GO:0005739 mitochondrion; GO:0005759 mitochondrial matrix; GO:0005967 mitochondrial pyruvate dehydrogenase complex; GO:0031974 membrane-enclosed lumen; GO:0032991 macromolecular complex; GO:0043209 myelin sheath; GO:0043226 organelle; GO:0043227 membrane-bounded organelle; GO:0043229 intracellular organelle; GO:0043231 intracellular…	GO:0000166 nucleotide binding; GO:0003824 catalytic activity; GO:0004742 dihydrolipoyllysine-residue acetyltransferase activity; GO:0005488 binding; GO:0005515 protein binding; GO:0016407 acetyltransferase activity; GO:0016417 S-acyltransferase activity; GO:0016418 S-acetyltransferase activity; GO:0016740 transferase activity; GO:0016746 transferase activity, transferring acyl groups; GO:0016747 …	K00627	DLAT, aceF, pdhC; pyruvate dehydrogenase E2 component (dihydrolipoamide acetyltransferase) [EC:2.3.1.12]	chx00010 Glycolysis / Gluconeogenesis - Capra hircus (goat); chx00020 Citrate cycle (TCA cycle) - Capra hircus (goat); chx00620 Pyruvate metabolism - Capra hircus (goat); chx01100 Metabolic pathways - Capra hircus (goat); chx01200 Carbon metabolism - Capra hircus (goat);	PF00364; PF00198	Biotin-requiring enzyme; 2-oxoacid dehydrogenases acyltransferase (catalytic domain)
A0A452ER37	26S proteasome regulatory subunit 7(predicted) OS=Capra hircus OX=9925 GN=PSMC2 PE=4 SV=1	1.529	Up	0.00025742	PSMC2	48.633	67.2	27	38	27	0.873	0.831	0.736	0.871	0.771	1.362	1.408	1.021	1.162	1.289	cytoplasm	GO:0001775 cell activation; GO:0002252 immune effector process; GO:0002263 cell activation involved in immune response; GO:0002274 myeloid leukocyte activation; GO:0002275 myeloid cell activation involved in immune response; GO:0002283 neutrophil activation involved in immune response; GO:0002366 leukocyte activation involved in immune response; GO:0002376 immune system process; GO:0002443 leukoc…	GO:0000502 proteasome complex; GO:0000932 P-body; GO:0005576 extracellular region; GO:0005622 intracellular; GO:0005623 cell; GO:0005634 nucleus; GO:0005654 nucleoplasm; GO:0005737 cytoplasm; GO:0005829 cytosol; GO:0005838 proteasome regulatory particle; GO:0008540 proteasome regulatory particle, base subcomplex; GO:0012505 endomembrane system; GO:0022624 proteasome accessory complex; GO:0030141 …	GO:0003824 catalytic activity; GO:0005488 binding; GO:0005515 protein binding; GO:0008134 transcription factor binding; GO:0016462 pyrophosphatase activity; GO:0016787 hydrolase activity; GO:0016817 hydrolase activity, acting on acid anhydrides; GO:0016818 hydrolase activity, acting on acid anhydrides, in phosphorus-containing anhydrides; GO:0016887 ATPase activity; GO:0017025 TBP-class protein b…	K03061	PSMC2, RPT1; 26S proteasome regulatory subunit T1	chx03050 Proteasome - Capra hircus (goat); chx05169 Epstein-Barr virus infection - Capra hircus (goat);	PF00004	ATPase family associated with various cellular activities (AAA)
A0A452G3R9	A-kinase anchor protein 3(predicted) OS=Capra hircus OX=9925 GN=AKAP3 PE=4 SV=1	0.317	Down	4.6785e-07	AKAP3	93.83	18.8	13	16	13	1.541	1.346	1.251	1.432	1.706	0.427	0.361	0.507	0.513	0.496	nucleus	GO:0000003 reproduction; GO:0007154 cell communication; GO:0007165 signal transduction; GO:0007166 cell surface receptor signaling pathway; GO:0007167 enzyme linked receptor protein signaling pathway; GO:0007178 transmembrane receptor protein serine/threonine kinase signaling pathway; GO:0007338 single fertilization; GO:0007340 acrosome reaction; GO:0008104 protein localization; GO:0009566 fertil…	GO:0001669 acrosomal vesicle; GO:0005622 intracellular; GO:0005623 cell; GO:0005737 cytoplasm; GO:0005929 cilium; GO:0012505 endomembrane system; GO:0030141 secretory granule; GO:0031410 cytoplasmic vesicle; GO:0031514 motile cilium; GO:0031982 vesicle; GO:0035686 sperm fibrous sheath; GO:0036126 sperm flagellum; GO:0042995 cell projection; GO:0043226 organelle; GO:0043227 membrane-bounded organe…	GO:0005488 binding; GO:0005515 protein binding; GO:0051018 protein kinase A binding;	K16520	AKAP3; A-kinase anchor protein 3
A0A452DPJ7	Fumarate hydratase(predicted) OS=Capra hircus OX=9925 GN=FH PE=4 SV=1	0.539	Down	0.00131883	FH	54.621	44.5	21	52	21	1.798	1.002	1.347	1.467	1.03	0.745	0.767	0.609	0.632	0.825	mitochondria	GO:0001894 tissue homeostasis; GO:0006082 organic acid metabolic process; GO:0006091 generation of precursor metabolites and energy; GO:0006099 tricarboxylic acid cycle; GO:0006101 citrate metabolic process; GO:0006106 fumarate metabolic process; GO:0006108 malate metabolic process; GO:0008152 metabolic process; GO:0009060 aerobic respiration; GO:0009987 cellular process; GO:0015980 energy deriva…	GO:0005622 intracellular; GO:0005623 cell; GO:0005737 cytoplasm; GO:0005739 mitochondrion; GO:0005759 mitochondrial matrix; GO:0031974 membrane-enclosed lumen; GO:0043226 organelle; GO:0043227 membrane-bounded organelle; GO:0043229 intracellular organelle; GO:0043231 intracellular membrane-bounded organelle; GO:0043233 organelle lumen; GO:0044422 organelle part; GO:0044424 intracellular part; GO:…	GO:0003824 catalytic activity; GO:0004333 fumarate hydratase activity; GO:0016829 lyase activity; GO:0016835 carbon-oxygen lyase activity; GO:0016836 hydro-lyase activity;	K01679	E4.2.1.2B, fumC; fumarate hydratase, class II [EC:4.2.1.2]	chx00020 Citrate cycle (TCA cycle) - Capra hircus (goat); chx00620 Pyruvate metabolism - Capra hircus (goat); chx01100 Metabolic pathways - Capra hircus (goat); chx01200 Carbon metabolism - Capra hircus (goat); chx04934 Cushing syndrome - Capra hircus (goat); chx05200 Pathways in cancer - Capra hircus (goat); chx05211 Renal cell carcinoma - Capra hircus (goat);	PF00206; PF10415	Lyase; Fumarase C C-terminus
A0A452FJS0	Fertilin alpha (Fragment)(predicted) OS=Capra hircus OX=9925 GN=LOC102177554 PE=4 SV=1	0.35	Down	3.0454e-06	LOC102177554	88.041	19.5	14	50	14	1.723	1.294	1.724	1.592	1.292	0.578	0.531	0.403	0.522	0.637	plasma membrane	GO:0000003 reproduction; GO:0006508 proteolysis; GO:0006807 nitrogen compound metabolic process; GO:0007276 gamete generation; GO:0007283 spermatogenesis; GO:0007338 single fertilization; GO:0007339 binding of sperm to zona pellucida; GO:0007342 fusion of sperm to egg plasma membrane; GO:0008037 cell recognition; GO:0008152 metabolic process; GO:0009566 fertilization; GO:0009987 cellular process;…	GO:0016020 membrane; GO:0016021 integral component of membrane; GO:0031224 intrinsic component of membrane; GO:0044425 membrane part; GO:0045121 membrane raft; GO:0098589 membrane region; GO:0098805 whole membrane; GO:0098857 membrane microdomain;	GO:0003824 catalytic activity; GO:0008233 peptidase activity; GO:0008237 metallopeptidase activity; GO:0016787 hydrolase activity; GO:0070011 peptidase activity, acting on L-amino acid peptides;	K08607	ADAM1; disintegrin and metalloproteinase domain-containing protein 1 [EC:3.4.24.-]		PF01421; PF00200	Reprolysin (M12B) family zinc metalloprotease ; Disintegrin
A0A452FP27	Serine protease inhibitor Kazal-type 2(predicted) OS=Capra hircus OX=9925 PE=4 SV=1	0.362	Down	1.61899e-05	---	9.1094	38.3	3	21	3	1.721	1.53	1.228	1.426	1.61	0.607	0.534	0.391	0.521	0.67	extracellular	GO:0000003 reproduction; GO:0002176 male germ cell proliferation; GO:0003006 developmental process involved in reproduction; GO:0007275 multicellular organism development; GO:0007276 gamete generation; GO:0007281 germ cell development; GO:0007283 spermatogenesis; GO:0007286 spermatid development; GO:0007548 sex differentiation; GO:0008283 cell proliferation; GO:0008406 gonad development; GO:00085…	GO:0001669 acrosomal vesicle; GO:0005576 extracellular region; GO:0005615 extracellular space; GO:0005622 intracellular; GO:0005623 cell; GO:0005737 cytoplasm; GO:0012505 endomembrane system; GO:0030141 secretory granule; GO:0031410 cytoplasmic vesicle; GO:0031982 vesicle; GO:0042995 cell projection; GO:0043005 neuron projection; GO:0043226 organelle; GO:0043227 membrane-bounded organelle; GO:004…	GO:0004857 enzyme inhibitor activity; GO:0004866 endopeptidase inhibitor activity; GO:0004867 serine-type endopeptidase inhibitor activity; GO:0030234 enzyme regulator activity; GO:0030414 peptidase inhibitor activity; GO:0061134 peptidase regulator activity; GO:0061135 endopeptidase regulator activity; GO:0098772 molecular function regulator;	K23418			PF00050	Kazal-type serine protease inhibitor domain
A0A452FZD4	SEPT4(predicted) OS=Capra hircus OX=9925 GN=SEPT4 PE=4 SV=1	0.297	Down	0.000181535	SEPT4	54.89	10.7	5	5	5	2.231	1.092	1.191	1.869	1.659	0.323	0.374	0.586	0.628	0.475	nucleus	GO:0000003 reproduction; GO:0003006 developmental process involved in reproduction; GO:0006915 apoptotic process; GO:0006996 organelle organization; GO:0007005 mitochondrion organization; GO:0007275 multicellular organism development; GO:0007276 gamete generation; GO:0007281 germ cell development; GO:0007283 spermatogenesis; GO:0007286 spermatid development; GO:0007399 nervous system development;…	GO:0005622 intracellular; GO:0005623 cell; GO:0005634 nucleus; GO:0005654 nucleoplasm; GO:0005737 cytoplasm; GO:0005739 mitochondrion; GO:0005856 cytoskeleton; GO:0005929 cilium; GO:0005938 cell cortex; GO:0031105 septin complex; GO:0031514 motile cilium; GO:0031974 membrane-enclosed lumen; GO:0031981 nuclear lumen; GO:0032156 septin cytoskeleton; GO:0032991 macromolecular complex; GO:0036126 spe…	GO:0000166 nucleotide binding; GO:0000287 magnesium ion binding; GO:0001882 nucleoside binding; GO:0001883 purine nucleoside binding; GO:0003824 catalytic activity; GO:0003924 GTPase activity; GO:0005198 structural molecule activity; GO:0005488 binding; GO:0005515 protein binding; GO:0005525 GTP binding; GO:0016462 pyrophosphatase activity; GO:0016787 hydrolase activity; GO:0016817 hydrolase acti…				PF00735	Septin
A0A452EHL5	Casein kinase II subunit beta(predicted) OS=Capra hircus OX=9925 GN=CSNK2B PE=4 SV=1	0.387	Down	0.0085802	CSNK2B	24.942	23.3	4	5	4	2.036	1.144	1.117	2.292	0.924	0.635	0.515	0.543	0.587	0.626	extracellular	GO:0001775 cell activation; GO:0001889 liver development; GO:0001932 regulation of protein phosphorylation; GO:0001934 positive regulation of protein phosphorylation; GO:0002009 morphogenesis of an epithelium; GO:0002252 immune effector process; GO:0002263 cell activation involved in immune response; GO:0002274 myeloid leukocyte activation; GO:0002275 myeloid cell activation involved in immune re…	GO:0000785 chromatin; GO:0005576 extracellular region; GO:0005622 intracellular; GO:0005623 cell; GO:0005634 nucleus; GO:0005654 nucleoplasm; GO:0005694 chromosome; GO:0005737 cytoplasm; GO:0005829 cytosol; GO:0005886 plasma membrane; GO:0005929 cilium; GO:0005956 protein kinase CK2 complex; GO:0012505 endomembrane system; GO:0016020 membrane; GO:0016363 nuclear matrix; GO:0030141 secretory granu…	GO:0003682 chromatin binding; GO:0003824 catalytic activity; GO:0004672 protein kinase activity; GO:0004674 protein serine/threonine kinase activity; GO:0005102 receptor binding; GO:0005488 binding; GO:0005515 protein binding; GO:0008134 transcription factor binding; GO:0016301 kinase activity; GO:0016740 transferase activity; GO:0016772 transferase activity, transferring phosphorus-containing gr…	K03115	CSNK2B; casein kinase II subunit beta	chx03008 Ribosome biogenesis in eukaryotes - Capra hircus (goat); chx04064 NF-kappa B signaling pathway - Capra hircus (goat); chx04137 Mitophagy - animal - Capra hircus (goat); chx04310 Wnt signaling pathway - Capra hircus (goat); chx04520 Adherens junction - Capra hircus (goat); chx05162 Measles - Capra hircus (goat); chx05235 PD-L1 expression and PD-1 checkpoint pathway in cancer - Capra hircu…	PF01214	Casein kinase II regulatory subunit
A0A452DWC1	Cilia and flagella associated protein 52(predicted) OS=Capra hircus OX=9925 GN=CFAP52 PE=4 SV=1	0.522	Down	9.8504e-05	CFAP52	68.691	17.3	10	12	10	1.541	1.233	1.17	1.554	1.15	0.61	0.646	0.815	0.783	0.617	nucleus
A0A452FZU7	Microfibril-associated glycoprotein 4 (Fragment)(predicted) OS=Capra hircus OX=9925 GN=MFAP4 PE=4 SV=1	0.626	Down	0.033857	MFAP4	28.563	9.8	2	2	2	0.946	1.356	1.865	1.047	1.29	0.962	0.682	1.229	0.672	0.527	extracellular	GO:0009314 response to radiation; GO:0009411 response to UV; GO:0009416 response to light stimulus; GO:0009628 response to abiotic stimulus; GO:0009650 UV protection; GO:0009987 cellular process; GO:0010224 response to UV-B; GO:0010712 regulation of collagen metabolic process; GO:0016043 cellular component organization; GO:0019222 regulation of metabolic process; GO:0022607 cellular component ass…	GO:0001527 microfibril; GO:0005576 extracellular region; GO:0031012 extracellular matrix; GO:0044420 extracellular matrix component; GO:0044421 extracellular region part; GO:0071953 elastic fiber; GO:0099080 supramolecular complex; GO:0099081 supramolecular polymer; GO:0099512 supramolecular fiber;					PF00147	Fibrinogen beta and gamma chains, C-terminal globular domain
A0A452FTX7	Transmembrane protein 89(predicted) OS=Capra hircus OX=9925 GN=TMEM89 PE=4 SV=1	0.392	Down	0.0074418	TMEM89	18.067	13.8	2	2	2	1.701	0.885	2.569	1.617	0.773	0.432	0.537	0.63	0.753	0.609	extracellular
A0A452FHB8	Beta-defensin(predicted) OS=Capra hircus OX=9925 PE=4 SV=1	1.766	Up	0.0030575	---	8.0727	34.8	4	6	4	0.729	0.685	0.751	0.783	0.785	1.102	1.619	1.302	1.062	1.506	extracellular	GO:0002376 immune system process; GO:0006950 response to stress; GO:0006952 defense response; GO:0006955 immune response; GO:0009605 response to external stimulus; GO:0009607 response to biotic stimulus; GO:0009617 response to bacterium; GO:0042742 defense response to bacterium; GO:0043207 response to external biotic stimulus; GO:0045087 innate immune response; GO:0050896 response to stimulus; GO…	GO:0005623 cell; GO:0009986 cell surface; GO:0044464 cell part;					PF13841	Beta defensin
A0A452ELS1	Serpin A3-6(predicted) OS=Capra hircus OX=9925 GN=LOC102186111 PE=4 SV=1	0.406	Down	0.00182399	LOC102186111	46.123	20.9	9	6	2	2.121	1.024	1.283	2.101	0.968	0.622	0.651	0.682	0.646	0.444	endoplasmic reticulum	GO:0001775 cell activation; GO:0001894 tissue homeostasis; GO:0002237 response to molecule of bacterial origin; GO:0002252 immune effector process; GO:0002263 cell activation involved in immune response; GO:0002274 myeloid leukocyte activation; GO:0002275 myeloid cell activation involved in immune response; GO:0002283 neutrophil activation involved in immune response; GO:0002366 leukocyte activat…	GO:0000323 lytic vacuole; GO:0005576 extracellular region; GO:0005615 extracellular space; GO:0005622 intracellular; GO:0005623 cell; GO:0005634 nucleus; GO:0005737 cytoplasm; GO:0005764 lysosome; GO:0005766 primary lysosome; GO:0005773 vacuole; GO:0005775 vacuolar lumen; GO:0012505 endomembrane system; GO:0030141 secretory granule; GO:0031091 platelet alpha granule; GO:0031093 platelet alpha gra…	GO:0003676 nucleic acid binding; GO:0003677 DNA binding; GO:0004857 enzyme inhibitor activity; GO:0004866 endopeptidase inhibitor activity; GO:0004867 serine-type endopeptidase inhibitor activity; GO:0005488 binding; GO:0030234 enzyme regulator activity; GO:0030414 peptidase inhibitor activity; GO:0061134 peptidase regulator activity; GO:0061135 endopeptidase regulator activity; GO:0097159 organi…				PF00079	Serpin (serine protease inhibitor)
A0A452E4F6	Testis-specific lysozyme-like protein 6(predicted) OS=Capra hircus OX=9925 GN=LYZL6 PE=4 SV=1	0.506	Down	0.0005827	LYZL6	16.569	18.9	3	5	3	1.543	1.411	1.053	1.44	1.419	0.707	0.661	0.725	0.689	0.694	extracellular	GO:0000003 reproduction; GO:0006950 response to stress; GO:0006952 defense response; GO:0007338 single fertilization; GO:0007342 fusion of sperm to egg plasma membrane; GO:0008152 metabolic process; GO:0009056 catabolic process; GO:0009566 fertilization; GO:0009605 response to external stimulus; GO:0009607 response to biotic stimulus; GO:0009617 response to bacterium; GO:0009987 cellular process;…	GO:0005576 extracellular region; GO:0005615 extracellular space; GO:0005623 cell; GO:0005886 plasma membrane; GO:0005929 cilium; GO:0016020 membrane; GO:0031514 motile cilium; GO:0036126 sperm flagellum; GO:0042995 cell projection; GO:0043226 organelle; GO:0044421 extracellular region part; GO:0044422 organelle part; GO:0044441 ciliary part; GO:0044463 cell projection part; GO:0044464 cell part; …	GO:0003796 lysozyme activity; GO:0003824 catalytic activity; GO:0004553 hydrolase activity, hydrolyzing O-glycosyl compounds; GO:0016787 hydrolase activity; GO:0016798 hydrolase activity, acting on glycosyl bonds; GO:0061783 peptidoglycan muralytic activity;				PF00062	C-type lysozyme/alpha-lactalbumin family
A0A452G5Q7	nuclear pore complex protein Nup50 isoform X1(predicted) OS=Capra hircus OX=9925 GN=NUP50 PE=4 SV=1	1.96	Up	2.3094e-06	NUP50	49.625	6.9	2	3	2	0.681	0.716	0.693	0.662	0.763	1.38	1.526	1.245	1.17	1.568	cytoplasm	GO:0001838 embryonic epithelial tube formation; GO:0001841 neural tube formation; GO:0002009 morphogenesis of an epithelium; GO:0006403 RNA localization; GO:0006405 RNA export from nucleus; GO:0006406 mRNA export from nucleus; GO:0006606 protein import into nucleus; GO:0006611 protein export from nucleus; GO:0006810 transport; GO:0006886 intracellular protein transport; GO:0006913 nucleocytoplasm…	GO:0005622 intracellular; GO:0005623 cell; GO:0005634 nucleus; GO:0005635 nuclear envelope; GO:0005643 nuclear pore; GO:0005654 nucleoplasm; GO:0012505 endomembrane system; GO:0016020 membrane; GO:0031090 organelle membrane; GO:0031965 nuclear membrane; GO:0031967 organelle envelope; GO:0031974 membrane-enclosed lumen; GO:0031975 envelope; GO:0031981 nuclear lumen; GO:0032991 macromolecular compl…	GO:0005488 binding; GO:0005515 protein binding; GO:0008536 Ran GTPase binding; GO:0017016 Ras GTPase binding; GO:0019899 enzyme binding; GO:0031267 small GTPase binding; GO:0051020 GTPase binding;	K14295	NUP50, NPAP60; nuclear pore complex protein Nup50	chx03013 RNA transport - Capra hircus (goat);	PF08911	NUP50 (Nucleoporin 50 kDa)
A0A452DNH8	Kinesin-like protein(predicted) OS=Capra hircus OX=9925 GN=KIF23 PE=4 SV=1	3.087	Up	0.000143568	KIF23	98.851	2.2	1	1	1	0.374	0.702	0.654	0.417	0.419	1.76	2.054	1.615	1.41	1.081	nucleus	GO:0000022 mitotic spindle elongation; GO:0000070 mitotic sister chromatid segregation; GO:0000226 microtubule cytoskeleton organization; GO:0000278 mitotic cell cycle; GO:0000280 nuclear division; GO:0000281 mitotic cytokinesis; GO:0000819 sister chromatid segregation; GO:0000910 cytokinesis; GO:0002376 immune system process; GO:0002478 antigen processing and presentation of exogenous peptide an…	GO:0005576 extracellular region; GO:0005622 intracellular; GO:0005623 cell; GO:0005634 nucleus; GO:0005654 nucleoplasm; GO:0005737 cytoplasm; GO:0005813 centrosome; GO:0005815 microtubule organizing center; GO:0005819 spindle; GO:0005829 cytosol; GO:0005856 cytoskeleton; GO:0005871 kinesin complex; GO:0005875 microtubule associated complex; GO:0015630 microtubule cytoskeleton; GO:0030496 midbody;…	GO:0003774 motor activity; GO:0003777 microtubule motor activity; GO:0003824 catalytic activity; GO:0005488 binding; GO:0005515 protein binding; GO:0008017 microtubule binding; GO:0008092 cytoskeletal protein binding; GO:0015631 tubulin binding; GO:0016462 pyrophosphatase activity; GO:0016787 hydrolase activity; GO:0016817 hydrolase activity, acting on acid anhydrides; GO:0016818 hydrolase activi…	K17387	KIF23; kinesin family member 23	chx05206 MicroRNAs in cancer - Capra hircus (goat);	PF00225	Kinesin motor domain
A0A452EK68	C-X-C motif chemokine(predicted) OS=Capra hircus OX=9925 GN=LOC102182395 PE=4 SV=1	0.643	Down	6.1475e-05	LOC102182395	10.939	44.7	3	6	3	1.258	1.133	1.283	1.428	1.075	0.762	0.855	0.841	0.734	0.782	extracellular	GO:0001775 cell activation; GO:0001906 cell killing; GO:0001910 regulation of leukocyte mediated cytotoxicity; GO:0001912 positive regulation of leukocyte mediated cytotoxicity; GO:0001975 response to amphetamine; GO:0002028 regulation of sodium ion transport; GO:0002237 response to molecule of bacterial origin; GO:0002252 immune effector process; GO:0002263 cell activation involved in immune res…	GO:0005576 extracellular region; GO:0005615 extracellular space; GO:0005622 intracellular; GO:0005623 cell; GO:0005737 cytoplasm; GO:0012505 endomembrane system; GO:0030141 secretory granule; GO:0031410 cytoplasmic vesicle; GO:0031974 membrane-enclosed lumen; GO:0031982 vesicle; GO:0031983 vesicle lumen; GO:0034774 secretory granule lumen; GO:0035580 specific granule lumen; GO:0042581 specific gr…	GO:0001664 G-protein coupled receptor binding; GO:0005102 receptor binding; GO:0005125 cytokine activity; GO:0005126 cytokine receptor binding; GO:0005488 binding; GO:0005515 protein binding; GO:0008009 chemokine activity; GO:0008047 enzyme activator activity; GO:0030234 enzyme regulator activity; GO:0030545 receptor regulator activity; GO:0042379 chemokine receptor binding; GO:0045236 CXCR chemo…	K05505	CXCL1_2_3, GRO; C-X-C motif chemokine 1/2/3	chx04060 Cytokine-cytokine receptor interaction - Capra hircus (goat); chx04061 Viral protein interaction with cytokine and cytokine receptor - Capra hircus (goat); chx04062 Chemokine signaling pathway - Capra hircus (goat); chx04064 NF-kappa B signaling pathway - Capra hircus (goat); chx04621 NOD-like receptor signaling pathway - Capra hircus (goat); chx04657 IL-17 signaling pathway - Capra hirc…	PF00048	Small cytokines (intecrine/chemokine), interleukin-8 like
A0A452G589	Mbt domain containing 1(predicted) OS=Capra hircus OX=9925 GN=MBTD1 PE=4 SV=1	2.562	Up	0.00041957	MBTD1	70.439	1.3	1	1	1	0.453	0.76	0.553	0.718	0.427	1.744	1.9	0.982	1.451	1.381	nucleus	GO:0001501 skeletal system development; GO:0007275 multicellular organism development; GO:0009790 embryo development; GO:0009792 embryo development ending in birth or egg hatching; GO:0032501 multicellular organismal process; GO:0032502 developmental process; GO:0043009 chordate embryonic development; GO:0048706 embryonic skeletal system development; GO:0048731 system development; GO:0048856 anat…		GO:0005488 binding; GO:0005515 protein binding; GO:0035064 methylated histone binding; GO:0042393 histone binding;				PF02820	mbt repeat
A0A452DP37	Golgi associated, gamma adaptin ear containing, ARF binding protein 3(predicted) OS=Capra hircus OX=9925 GN=GGA3 PE=4 SV=1	1.627	Up	0.040378	GGA3	76.355	2.7	2	2	2	0.884	0.772	0.783	0.888	0.657	1.309	2.141	1.31	0.874	0.849	nucleus	GO:0006807 nitrogen compound metabolic process; GO:0006810 transport; GO:0006886 intracellular protein transport; GO:0008104 protein localization; GO:0008152 metabolic process; GO:0009893 positive regulation of metabolic process; GO:0009894 regulation of catabolic process; GO:0009896 positive regulation of catabolic process; GO:0009987 cellular process; GO:0010604 positive regulation of macromole…	GO:0005622 intracellular; GO:0005623 cell; GO:0005737 cytoplasm; GO:0005768 endosome; GO:0005769 early endosome; GO:0005794 Golgi apparatus; GO:0005802 trans-Golgi network; GO:0010008 endosome membrane; GO:0012505 endomembrane system; GO:0016020 membrane; GO:0031090 organelle membrane; GO:0031410 cytoplasmic vesicle; GO:0031901 early endosome membrane; GO:0031982 vesicle; GO:0031984 organelle sub…	GO:0005488 binding; GO:0005515 protein binding; GO:0019899 enzyme binding; GO:0030306 ADP-ribosylation factor binding; GO:0031267 small GTPase binding; GO:0051020 GTPase binding;	K12404	GGA; ADP-ribosylation factor-binding protein GGA	chx04142 Lysosome - Capra hircus (goat);	PF00790; PF03127; PF02883	VHS domain; GAT domain; Adaptin C-terminal domain
A0A452E6K3	Beta-galactosidase(predicted) OS=Capra hircus OX=9925 GN=LOC102173955 PE=4 SV=1	1.954	Up	0.014562	LOC102173955	71.859	18.1	11	12	10	0.801	0.592	0.607	0.843	0.557	2.411	1.276	0.96	0.88	1.117	extracellular							PF01301	Glycosyl hydrolases family 35
A0A452DSR1	Inositol polyphosphate 1-phosphatase(predicted) OS=Capra hircus OX=9925 GN=INPP1 PE=4 SV=1	1.689	Up	0.00123956	INPP1	42.79	12.3	4	6	4	0.774	0.883	0.7	0.781	0.768	1.64	1.449	0.923	1.213	1.371	cytoplasm	GO:0006066 alcohol metabolic process; GO:0006793 phosphorus metabolic process; GO:0006796 phosphate-containing compound metabolic process; GO:0007154 cell communication; GO:0007165 signal transduction; GO:0008152 metabolic process; GO:0009987 cellular process; GO:0016311 dephosphorylation; GO:0019637 organophosphate metabolic process; GO:0019751 polyol metabolic process; GO:0023052 signaling; GO:…	GO:0005622 intracellular; GO:0005623 cell; GO:0005737 cytoplasm; GO:0005829 cytosol; GO:0044424 intracellular part; GO:0044444 cytoplasmic part; GO:0044464 cell part;	GO:0003824 catalytic activity; GO:0004441 inositol-1,4-bisphosphate 1-phosphatase activity; GO:0016312 inositol bisphosphate phosphatase activity; GO:0016787 hydrolase activity; GO:0016788 hydrolase activity, acting on ester bonds; GO:0016791 phosphatase activity; GO:0042578 phosphoric ester hydrolase activity; GO:0046030 inositol trisphosphate phosphatase activity; GO:0052745 inositol phosphate …	K01107	INPP1; inositol polyphosphate 1-phosphatase [EC:3.1.3.57]	chx00562 Inositol phosphate metabolism - Capra hircus (goat); chx01100 Metabolic pathways - Capra hircus (goat); chx04070 Phosphatidylinositol signaling system - Capra hircus (goat);
A0A452FUI6	Coactosin-like protein(predicted) OS=Capra hircus OX=9925 GN=COTL1 PE=4 SV=1	1.734	Up	0.0143365	COTL1	16.01	68.3	8	14	8	0.579	0.871	0.555	0.665	1.151	1.849	1.122	1.062	1.031	1.561	cytoplasm	GO:0001775 cell activation; GO:0002252 immune effector process; GO:0002263 cell activation involved in immune response; GO:0002274 myeloid leukocyte activation; GO:0002275 myeloid cell activation involved in immune response; GO:0002283 neutrophil activation involved in immune response; GO:0002366 leukocyte activation involved in immune response; GO:0002376 immune system process; GO:0002443 leukoc…	GO:0005576 extracellular region; GO:0005622 intracellular; GO:0005623 cell; GO:0005737 cytoplasm; GO:0012505 endomembrane system; GO:0030141 secretory granule; GO:0031410 cytoplasmic vesicle; GO:0031974 membrane-enclosed lumen; GO:0031982 vesicle; GO:0031983 vesicle lumen; GO:0034774 secretory granule lumen; GO:0043226 organelle; GO:0043227 membrane-bounded organelle; GO:0043229 intracellular org…	GO:0003779 actin binding; GO:0005488 binding; GO:0005515 protein binding; GO:0008092 cytoskeletal protein binding; GO:0019899 enzyme binding;				PF00241	Cofilin/tropomyosin-type actin-binding protein
A0A452G7K1	Myosin XVB(predicted) OS=Capra hircus OX=9925 PE=4 SV=1	0.546	Down	0.00084055	---	51.581	1.8	1	1	1	1.458	1.003	1.419	1.407	1.447	0.521	0.861	0.665	0.788	0.844	nucleus				K10361	MYO15; myosin XV		PF00373	FERM central domain
A0A452DRG4	Mesothelin(predicted) OS=Capra hircus OX=9925 GN=MSLN PE=4 SV=1	0.484	Down	0.0025214	MSLN	44.4	19.6	7	8	7	1.715	1.235	0.94	1.686	1.452	0.459	0.563	0.886	0.622	0.873	plasma membrane	GO:0006464 cellular protein modification process; GO:0006807 nitrogen compound metabolic process; GO:0007155 cell adhesion; GO:0007160 cell-matrix adhesion; GO:0007275 multicellular organism development; GO:0008152 metabolic process; GO:0009987 cellular process; GO:0019538 protein metabolic process; GO:0022610 biological adhesion; GO:0031016 pancreas development; GO:0031589 cell-substrate adhesio…	GO:0005576 extracellular region; GO:0005615 extracellular space; GO:0005622 intracellular; GO:0005623 cell; GO:0005737 cytoplasm; GO:0005783 endoplasmic reticulum; GO:0005788 endoplasmic reticulum lumen; GO:0005794 Golgi apparatus; GO:0005886 plasma membrane; GO:0009986 cell surface; GO:0012505 endomembrane system; GO:0016020 membrane; GO:0031974 membrane-enclosed lumen; GO:0043226 organelle; GO:…		K20733	MSLN; mesothelin
A0A452E0R1	HEAT repeat-containing protein 7A (Fragment)(predicted) OS=Capra hircus OX=9925 PE=4 SV=1	1.624	Up	0.0068439	---	123	2.2	2	2	2	0.854	0.741	0.695	0.849	0.804	0.922	1.669	0.948	1.383	1.481	nucleus
A0A452G696	Prominin 1(predicted) OS=Capra hircus OX=9925 GN=PROM1 PE=4 SV=1	0.506	Down	0.00086354	PROM1	96.608	8.3	8	9	8	1.608	1.14	1.118	1.467	1.489	0.776	0.602	0.46	0.864	0.749	plasma membrane	GO:0001654 eye development; GO:0001655 urogenital system development; GO:0001754 eye photoreceptor cell differentiation; GO:0001822 kidney development; GO:0001894 tissue homeostasis; GO:0001895 retina homeostasis; GO:0003407 neural retina development; GO:0007275 multicellular organism development; GO:0007399 nervous system development; GO:0007423 sensory organ development; GO:0009653 anatomical s…	GO:0001750 photoreceptor outer segment; GO:0005576 extracellular region; GO:0005615 extracellular space; GO:0005622 intracellular; GO:0005623 cell; GO:0005737 cytoplasm; GO:0005783 endoplasmic reticulum; GO:0005793 endoplasmic reticulum-Golgi intermediate compartment; GO:0005886 plasma membrane; GO:0005887 integral component of plasma membrane; GO:0005902 microvillus; GO:0005903 brush border; GO:…	GO:0005488 binding; GO:0005515 protein binding; GO:0008092 cytoskeletal protein binding; GO:0042805 actinin binding; GO:0045296 cadherin binding; GO:0050839 cell adhesion molecule binding;	K06532	PROM1, CD133; prominin 1	chx05202 Transcriptional misregulation in cancer - Capra hircus (goat);
A0A452F5S0	Inositol 1,4,5-trisphosphate receptor type 1(predicted) OS=Capra hircus OX=9925 GN=ITPR1 PE=4 SV=1	2.055	Up	0.00059742	ITPR1	308.53	0.3	1	1	1	0.643	0.619	0.984	0.675	0.527	1.194	1.446	1.887	1.194	1.366	plasma membrane	GO:0006810 transport; GO:0006811 ion transport; GO:0006812 cation transport; GO:0006816 calcium ion transport; GO:0006873 cellular ion homeostasis; GO:0006874 cellular calcium ion homeostasis; GO:0006875 cellular metal ion homeostasis; GO:0006915 apoptotic process; GO:0006950 response to stress; GO:0007154 cell communication; GO:0007165 signal transduction; GO:0007204 positive regulation of cytos…	GO:0005622 intracellular; GO:0005623 cell; GO:0005737 cytoplasm; GO:0005783 endoplasmic reticulum; GO:0005789 endoplasmic reticulum membrane; GO:0005791 rough endoplasmic reticulum; GO:0005886 plasma membrane; GO:0012505 endomembrane system; GO:0016020 membrane; GO:0016021 integral component of membrane; GO:0030141 secretory granule; GO:0030176 integral component of endoplasmic reticulum membrane…	GO:0005215 transporter activity; GO:0005216 ion channel activity; GO:0005217 intracellular ligand-gated ion channel activity; GO:0005220 inositol 1,4,5-trisphosphate-sensitive calcium-release channel activity; GO:0005261 cation channel activity; GO:0005262 calcium channel activity; GO:0005488 binding; GO:0005509 calcium ion binding; GO:0005543 phospholipid binding; GO:0008289 lipid binding; GO:00…	K04958	ITPR1; inositol 1,4,5-triphosphate receptor type 1	chx04020 Calcium signaling pathway - Capra hircus (goat); chx04022 cGMP-PKG signaling pathway - Capra hircus (goat); chx04070 Phosphatidylinositol signaling system - Capra hircus (goat); chx04114 Oocyte meiosis - Capra hircus (goat); chx04140 Autophagy - animal - Capra hircus (goat); chx04210 Apoptosis - Capra hircus (goat); chx04218 Cellular senescence - Capra hircus (goat); chx04270 Vascular sm…	PF08709; PF02815	Inositol 1,4,5-trisphosphate/ryanodine receptor; MIR domain
A0A452FMD2	Cilia and flagella associated protein 61(predicted) OS=Capra hircus OX=9925 GN=CFAP61 PE=4 SV=1	0.604	Down	0.00131814	CFAP61	142.17	2.3	2	2	2	1.693	1.109	1.321	1.355	1.045	0.938	0.779	0.792	0.782	0.65	cytoplasm,nucleus	GO:0003341 cilium movement; GO:0006928 movement of cell or subcellular component; GO:0006996 organelle organization; GO:0007017 microtubule-based process; GO:0007018 microtubule-based movement; GO:0009987 cellular process; GO:0016043 cellular component organization; GO:0030030 cell projection organization; GO:0044782 cilium organization; GO:0071840 cellular component organization or biogenesis;	GO:0005622 intracellular; GO:0005623 cell; GO:0005737 cytoplasm; GO:0005856 cytoskeleton; GO:0005929 cilium; GO:0005930 axoneme; GO:0031514 motile cilium; GO:0032838 cell projection cytoplasm; GO:0042995 cell projection; GO:0043226 organelle; GO:0043228 non-membrane-bounded organelle; GO:0043229 intracellular organelle; GO:0043232 intracellular non-membrane-bounded organelle; GO:0044422 organelle…
A0A452DLP6	Jumonji domain containing 8(predicted) OS=Capra hircus OX=9925 GN=JMJD8 PE=4 SV=1	2.127	Up	0.024678	JMJD8	28.541	14.5	4	4	4	0.708	0.56	0.617	0.748	0.703	1.993	2.046	1.093	1.21	0.754	extracellular							PF13621	Cupin-like domain
A0A452E2P1	Ig alpha-1 chain C region (Fragment)(predicted) OS=Capra hircus OX=9925 PE=4 SV=1	0.239	Down	0.036244	---	34.884	21.3	6	22	6	0.446	2.726	1.076	0.777	3.193	0.312	0.368	0.472	0.37	0.441	mitochondria				K06856	IGH; immunoglobulin heavy chain		PF07654; PF00047	Immunoglobulin C1-set domain; Immunoglobulin domain
A0A452FEB2	Insulin-like peptide INSL6(predicted) OS=Capra hircus OX=9925 GN=INSL6 PE=4 SV=1	0.47	Down	0.00105797	INSL6	23.899	14.6	3	9	3	1.759	1.565	0.812	1.396	1.5	0.764	0.676	0.542	0.646	0.68	extracellular	GO:0000003 reproduction; GO:0003006 developmental process involved in reproduction; GO:0006928 movement of cell or subcellular component; GO:0007275 multicellular organism development; GO:0007276 gamete generation; GO:0007281 germ cell development; GO:0007283 spermatogenesis; GO:0007286 spermatid development; GO:0007548 sex differentiation; GO:0008406 gonad development; GO:0008584 male gonad deve…		GO:0005102 receptor binding; GO:0005179 hormone activity; GO:0005488 binding; GO:0005515 protein binding; GO:0030545 receptor regulator activity; GO:0048018 receptor agonist activity; GO:0098772 molecular function regulator;	K05255	INSL6; insulin-like 6		PF00049	Insulin/IGF/Relaxin family
A0A452EDZ4	Protein S100(predicted) OS=Capra hircus OX=9925 GN=S100A12 PE=4 SV=1	0.534	Down	0.031125	S100A12	10.89	70.7	7	14	7	0.898	0.967	2.469	1.428	0.975	0.762	0.495	0.822	0.614	0.906	cytoplasm	GO:0001775 cell activation; GO:0001816 cytokine production; GO:0001906 cell killing; GO:0001932 regulation of protein phosphorylation; GO:0001934 positive regulation of protein phosphorylation; GO:0002252 immune effector process; GO:0002263 cell activation involved in immune response; GO:0002274 myeloid leukocyte activation; GO:0002275 myeloid cell activation involved in immune response; GO:00022…	GO:0005576 extracellular region; GO:0005622 intracellular; GO:0005623 cell; GO:0005634 nucleus; GO:0005737 cytoplasm; GO:0005829 cytosol; GO:0005856 cytoskeleton; GO:0005886 plasma membrane; GO:0012505 endomembrane system; GO:0016020 membrane; GO:0030141 secretory granule; GO:0031410 cytoplasmic vesicle; GO:0031974 membrane-enclosed lumen; GO:0031982 vesicle; GO:0031983 vesicle lumen; GO:0034774 …	GO:0005102 receptor binding; GO:0005488 binding; GO:0005507 copper ion binding; GO:0005509 calcium ion binding; GO:0005515 protein binding; GO:0008144 drug binding; GO:0008270 zinc ion binding; GO:0043167 ion binding; GO:0043169 cation binding; GO:0046872 metal ion binding; GO:0046914 transition metal ion binding; GO:0050786 RAGE receptor binding;				PF01023; PF00036	S-100/ICaBP type calcium binding domain; EF hand
A0A452G4P2	G2/M phase-specific E3 ubiquitin-protein ligase(predicted) OS=Capra hircus OX=9925 GN=G2E3 PE=4 SV=1	1.961	Up	4.0635e-06	G2E3	80.262	1.4	1	1	1	0.704	0.682	0.692	0.796	0.655	1.697	1.386	1.296	1.34	1.201	nucleus	GO:0000209 protein polyubiquitination; GO:0001701 in utero embryonic development; GO:0001824 blastocyst development; GO:0006464 cellular protein modification process; GO:0006807 nitrogen compound metabolic process; GO:0007275 multicellular organism development; GO:0008152 metabolic process; GO:0009790 embryo development; GO:0009792 embryo development ending in birth or egg hatching; GO:0009966 re…	GO:0005622 intracellular; GO:0005623 cell; GO:0005737 cytoplasm; GO:0005829 cytosol; GO:0043226 organelle; GO:0043227 membrane-bounded organelle; GO:0043229 intracellular organelle; GO:0043231 intracellular membrane-bounded organelle; GO:0044424 intracellular part; GO:0044444 cytoplasmic part; GO:0044464 cell part;	GO:0003824 catalytic activity; GO:0004842 ubiquitin-protein transferase activity; GO:0016740 transferase activity; GO:0019787 ubiquitin-like protein transferase activity; GO:0061630 ubiquitin protein ligase activity; GO:0061659 ubiquitin-like protein ligase activity;	K22371			PF13771; PF00632	PHD-like zinc-binding domain; HECT-domain (ubiquitin-transferase)
A0A452DXE2	Complement component 3(predicted) OS=Capra hircus OX=9925 GN=C3 PE=4 SV=1	0.45	Down	0.00122442	C3	187.2	43.2	81	64	32	1.183	1.013	2.12	1.566	1.112	0.486	0.665	0.79	0.657	0.548	plasma membrane	GO:0001775 cell activation; GO:0001796 regulation of type IIa hypersensitivity; GO:0001798 positive regulation of type IIa hypersensitivity; GO:0001817 regulation of cytokine production; GO:0001819 positive regulation of cytokine production; GO:0001932 regulation of protein phosphorylation; GO:0001934 positive regulation of protein phosphorylation; GO:0001969 regulation of activation of membrane …	GO:0000323 lytic vacuole; GO:0005576 extracellular region; GO:0005615 extracellular space; GO:0005622 intracellular; GO:0005623 cell; GO:0005737 cytoplasm; GO:0005764 lysosome; GO:0005766 primary lysosome; GO:0005773 vacuole; GO:0005775 vacuolar lumen; GO:0005783 endoplasmic reticulum; GO:0005788 endoplasmic reticulum lumen; GO:0005886 plasma membrane; GO:0012505 endomembrane system; GO:0016020 m…	GO:0001664 G-protein coupled receptor binding; GO:0003824 catalytic activity; GO:0004175 endopeptidase activity; GO:0004252 serine-type endopeptidase activity; GO:0005102 receptor binding; GO:0005488 binding; GO:0005515 protein binding; GO:0008233 peptidase activity; GO:0008236 serine-type peptidase activity; GO:0008289 lipid binding; GO:0016787 hydrolase activity; GO:0017171 serine hydrolase act…	K03990	C3; complement component 3	chx04080 Neuroactive ligand-receptor interaction - Capra hircus (goat); chx04145 Phagosome - Capra hircus (goat); chx04610 Complement and coagulation cascades - Capra hircus (goat); chx05133 Pertussis - Capra hircus (goat); chx05134 Legionellosis - Capra hircus (goat); chx05140 Leishmaniasis - Capra hircus (goat); chx05142 Chagas disease (American trypanosomiasis) - Capra hircus (goat); chx05150 …	PF01835; PF07703; PF01821; PF07678; PF07677; PF01759	MG2 domain; Alpha-2-macroglobulin family N-terminal region; Anaphylotoxin-like domain; A-macroglobulin complement component; A-macroglobulin receptor; UNC-6/NTR/C345C module
A0A452E271	Family with sequence similarity 3 member D(predicted) OS=Capra hircus OX=9925 GN=FAM3D PE=4 SV=1	2.19	Up	0.00073796	FAM3D	24.915	65	12	24	12	0.67	0.593	0.449	0.66	0.761	1.863	1.577	0.951	1.195	1.276	extracellular	GO:0002791 regulation of peptide secretion; GO:0002792 negative regulation of peptide secretion; GO:0009966 regulation of signal transduction; GO:0010469 regulation of receptor activity; GO:0010646 regulation of cell communication; GO:0010648 negative regulation of cell communication; GO:0010817 regulation of hormone levels; GO:0023051 regulation of signaling; GO:0023057 negative regulation of si…	GO:0005576 extracellular region;	GO:0005102 receptor binding; GO:0005125 cytokine activity; GO:0005488 binding; GO:0005515 protein binding; GO:0030545 receptor regulator activity; GO:0048018 receptor agonist activity; GO:0098772 molecular function regulator;
A0A452G667	leucine-rich repeat-containing protein 37B-like(predicted) OS=Capra hircus OX=9925 PE=4 SV=1	0.268	Down	1.80164e-05	---	74.048	20	17	47	17	2.137	1.234	1.42	1.922	1.249	0.333	0.372	0.411	0.535	0.485	cytoplasm
A0A452FUL7	T-complex protein 1 subunit zeta-2(predicted) OS=Capra hircus OX=9925 GN=CCT6B PE=4 SV=1	1.579	Up	0.013795	CCT6B	58.033	40.7	22	42	12	0.771	0.842	0.634	0.814	0.809	1.697	1.069	0.825	1.068	1.45	cytoplasm	GO:0000003 reproduction; GO:0006457 protein folding; GO:0006458 'de novo' protein folding; GO:0006810 transport; GO:0007276 gamete generation; GO:0007283 spermatogenesis; GO:0008104 protein localization; GO:0009987 cellular process; GO:0015031 protein transport; GO:0015833 peptide transport; GO:0016043 cellular component organization; GO:0019953 sexual reproduction; GO:0022414 reproductive proces…	GO:0005622 intracellular; GO:0005623 cell; GO:0005737 cytoplasm; GO:0005829 cytosol; GO:0005832 chaperonin-containing T-complex; GO:0032991 macromolecular complex; GO:0044424 intracellular part; GO:0044444 cytoplasmic part; GO:0044445 cytosolic part; GO:0044464 cell part; GO:0101031 chaperone complex;	GO:0005215 transporter activity; GO:0005488 binding; GO:0005515 protein binding; GO:0008565 protein transporter activity; GO:0044183 protein binding involved in protein folding; GO:0051082 unfolded protein binding;	K09498	CCT6; T-complex protein 1 subunit zeta
A0A452F148	UV excision repair protein RAD23 homolog A(predicted) OS=Capra hircus OX=9925 GN=RAD23A PE=4 SV=1	1.513	Up	0.014799	RAD23A	39.619	23.5	7	9	5	0.84	0.891	0.655	0.811	0.943	1.633	1.331	0.893	0.997	1.41	cytoplasm,mitochondria	GO:0006139 nucleobase-containing compound metabolic process; GO:0006259 DNA metabolic process; GO:0006281 DNA repair; GO:0006289 nucleotide-excision repair; GO:0006464 cellular protein modification process; GO:0006508 proteolysis; GO:0006725 cellular aromatic compound metabolic process; GO:0006807 nitrogen compound metabolic process; GO:0006950 response to stress; GO:0006974 cellular response to …	GO:0005622 intracellular; GO:0005623 cell; GO:0005634 nucleus; GO:0005654 nucleoplasm; GO:0005737 cytoplasm; GO:0005815 microtubule organizing center; GO:0005829 cytosol; GO:0005856 cytoskeleton; GO:0015630 microtubule cytoskeleton; GO:0031974 membrane-enclosed lumen; GO:0031981 nuclear lumen; GO:0032991 macromolecular complex; GO:0043226 organelle; GO:0043227 membrane-bounded organelle; GO:00432…	GO:0002020 protease binding; GO:0003676 nucleic acid binding; GO:0003677 DNA binding; GO:0003697 single-stranded DNA binding; GO:0005488 binding; GO:0005515 protein binding; GO:0019899 enzyme binding; GO:0019900 kinase binding; GO:0031593 polyubiquitin binding; GO:0097159 organic cyclic compound binding; GO:1901363 heterocyclic compound binding; GO:1990381 ubiquitin-specific protease binding;	K10839	RAD23, HR23; UV excision repair protein RAD23	chx03420 Nucleotide excision repair - Capra hircus (goat); chx04141 Protein processing in endoplasmic reticulum - Capra hircus (goat);	PF00240; PF00627; PF09280	Ubiquitin family; UBA/TS-N domain; XPC-binding domain
A0A452DTH2	Talin-1 (Fragment)(predicted) OS=Capra hircus OX=9925 GN=TLN1 PE=4 SV=1	0.559	Down	0.0146961	TLN1	267.22	0.8	2	2	2	1.49	1.207	0.917	1.795	1.273	1.267	0.697	0.498	0.733	0.538	nucleus	GO:0002576 platelet degranulation; GO:0003008 system process; GO:0003012 muscle system process; GO:0006810 transport; GO:0006887 exocytosis; GO:0006936 muscle contraction; GO:0006950 response to stress; GO:0006986 response to unfolded protein; GO:0006996 organelle organization; GO:0007010 cytoskeleton organization; GO:0007016 cytoskeletal anchoring at plasma membrane; GO:0007043 cell-cell junctio…	GO:0001726 ruffle; GO:0005576 extracellular region; GO:0005622 intracellular; GO:0005623 cell; GO:0005737 cytoplasm; GO:0005829 cytosol; GO:0005912 adherens junction; GO:0005924 cell-substrate adherens junction; GO:0005925 focal adhesion; GO:0030054 cell junction; GO:0030055 cell-substrate junction; GO:0031252 cell leading edge; GO:0042995 cell projection; GO:0044424 intracellular part; GO:004444…	GO:0001786 phosphatidylserine binding; GO:0005102 receptor binding; GO:0005178 integrin binding; GO:0005198 structural molecule activity; GO:0005200 structural constituent of cytoskeleton; GO:0005488 binding; GO:0005515 protein binding; GO:0005543 phospholipid binding; GO:0008092 cytoskeletal protein binding; GO:0008289 lipid binding; GO:0017166 vinculin binding; GO:0019904 protein domain specifi…	K06271	TLN; talin	chx04015 Rap1 signaling pathway - Capra hircus (goat); chx04510 Focal adhesion - Capra hircus (goat); chx04611 Platelet activation - Capra hircus (goat); chx05166 Human T-cell leukemia virus 1 infection - Capra hircus (goat);	PF09379; PF00373; PF09141; PF08913	FERM N-terminal domain ; FERM central domain; Talin, middle domain; Vinculin Binding Site
A0A452DQX3	Actin-like protein 7B(predicted) OS=Capra hircus OX=9925 GN=LOC102177288 PE=4 SV=1	0.407	Down	2.595e-06	LOC102177288	129.17	7.8	6	7	6	1.438	1.201	1.807	1.367	1.286	0.594	0.485	0.627	0.568	0.617	nucleus
A0A452EIR7	transmembrane protein 134 isoform X3(predicted) OS=Capra hircus OX=9925 GN=TMEM134 PE=4 SV=1	4.119	Up	3.5167e-05	TMEM134	20.561	4.4	1	1	1	0.481	0.346	0.298	0.524	0.367	1.149	1.838	1.351	1.531	2.434	plasma membrane
A0A452G7C1	WDR51B protein(predicted) OS=Capra hircus OX=9925 GN=POC1B PE=4 SV=1	0.349	Down	6.3699e-08	POC1B	50.765	2	1	1	1	1.726	1.536	1.473	1.504	1.508	0.477	0.557	0.589	0.47	0.612	nucleus	GO:0001894 tissue homeostasis; GO:0001895 retina homeostasis; GO:0006996 organelle organization; GO:0008283 cell proliferation; GO:0009987 cellular process; GO:0016043 cellular component organization; GO:0022607 cellular component assembly; GO:0030030 cell projection organization; GO:0030031 cell projection assembly; GO:0032501 multicellular organismal process; GO:0042592 homeostatic process; GO:…	GO:0000922 spindle pole; GO:0005622 intracellular; GO:0005623 cell; GO:0005737 cytoplasm; GO:0005813 centrosome; GO:0005814 centriole; GO:0005815 microtubule organizing center; GO:0005819 spindle; GO:0005856 cytoskeleton; GO:0005929 cilium; GO:0015630 microtubule cytoskeleton; GO:0036064 ciliary basal body; GO:0042995 cell projection; GO:0043226 organelle; GO:0043228 non-membrane-bounded organell…		K16482	POC1; centriolar protein POC1
A0A452G3P8	UPF0468 protein C16orf80(predicted) OS=Capra hircus OX=9925 GN=CFAP20 PE=4 SV=1	0.228	Down	0.000117059	CFAP20	22.748	14.5	3	3	3	2.145	1.531	0.831	2.106	1.389	0.323	0.328	0.279	0.346	0.55	mitochondria	GO:0003352 regulation of cilium movement; GO:0003356 regulation of cilium beat frequency; GO:0006464 cellular protein modification process; GO:0006807 nitrogen compound metabolic process; GO:0006996 organelle organization; GO:0007275 multicellular organism development; GO:0008152 metabolic process; GO:0009987 cellular process; GO:0016043 cellular component organization; GO:0018095 protein polyglu…	GO:0005622 intracellular; GO:0005623 cell; GO:0005634 nucleus; GO:0005737 cytoplasm; GO:0005814 centriole; GO:0005815 microtubule organizing center; GO:0005856 cytoskeleton; GO:0005929 cilium; GO:0015630 microtubule cytoskeleton; GO:0036064 ciliary basal body; GO:0042995 cell projection; GO:0043226 organelle; GO:0043227 membrane-bounded organelle; GO:0043228 non-membrane-bounded organelle; GO:004…
Q9XSQ8	MAP28 protein OS=Capra hircus OX=9925 GN=map28 PE=2 SV=1	0.633	Down	0.0061841	map28	17.744	31.6	4	5	3	1.14	1.07	1.309	1.835	1.212	0.703	0.682	0.921	0.828	1.023	extracellular		GO:0005576 extracellular region;		K13916	CAMP, LL37; cathelicidin antimicrobial peptide	chx04621 NOD-like receptor signaling pathway - Capra hircus (goat); chx04970 Salivary secretion - Capra hircus (goat); chx05150 Staphylococcus aureus infection - Capra hircus (goat); chx05152 Tuberculosis - Capra hircus (goat);	PF00666	Cathelicidin
A0A452G642	Sodium channel subunit beta-2(predicted) OS=Capra hircus OX=9925 GN=SCN2B PE=4 SV=1	0.423	Down	0.0075643	SCN2B	24.356	4.2	1	1	1	0.834	1.94	1.306	0.867	2.367	0.507	0.594	0.56	0.679	0.756	extracellular	GO:0001508 action potential; GO:0002027 regulation of heart rate; GO:0002028 regulation of sodium ion transport; GO:0003008 system process; GO:0003012 muscle system process; GO:0003013 circulatory system process; GO:0003015 heart process; GO:0003254 regulation of membrane depolarization; GO:0006810 transport; GO:0006811 ion transport; GO:0006812 cation transport; GO:0006814 sodium ion transport; …	GO:0001518 voltage-gated sodium channel complex; GO:0005623 cell; GO:0005886 plasma membrane; GO:0005887 integral component of plasma membrane; GO:0016020 membrane; GO:0016021 integral component of membrane; GO:0031224 intrinsic component of membrane; GO:0031226 intrinsic component of plasma membrane; GO:0032991 macromolecular complex; GO:0034702 ion channel complex; GO:0034703 cation channel com…	GO:0005215 transporter activity; GO:0005216 ion channel activity; GO:0005248 voltage-gated sodium channel activity; GO:0005261 cation channel activity; GO:0005272 sodium channel activity; GO:0008324 cation transmembrane transporter activity; GO:0015075 ion transmembrane transporter activity; GO:0015077 monovalent inorganic cation transmembrane transporter activity; GO:0015081 sodium ion transmemb…	K04846	SCN2B; voltage-gated sodium channel type II beta		PF07686	Immunoglobulin V-set domain
A0A452FTS2	Riboflavin kinase(predicted) OS=Capra hircus OX=9925 GN=RFK PE=4 SV=1	2.56	Up	0.0004436	RFK	17.665	10.3	3	4	3	0.675	0.582	0.382	0.647	0.609	2.066	1.675	0.989	1.236	1.445	mitochondria				K00861	RFK, FMN1; riboflavin kinase [EC:2.7.1.26]	chx00740 Riboflavin metabolism - Capra hircus (goat); chx01100 Metabolic pathways - Capra hircus (goat);	PF01687	Riboflavin kinase
A0A452F873	Cytochrome c oxidase subunit(predicted) OS=Capra hircus OX=9925 GN=COX6B2 PE=4 SV=1	0.65	Down	0.0035432	COX6B2	10.519	47.7	4	6	4	1.455	1.021	1.312	1.463	1.028	0.634	0.786	0.913	0.837	0.911	extracellular		GO:0005622 intracellular; GO:0005623 cell; GO:0005737 cytoplasm; GO:0005739 mitochondrion; GO:0005740 mitochondrial envelope; GO:0005743 mitochondrial inner membrane; GO:0016020 membrane; GO:0019866 organelle inner membrane; GO:0030061 mitochondrial crista; GO:0031090 organelle membrane; GO:0031966 mitochondrial membrane; GO:0031967 organelle envelope; GO:0031975 envelope; GO:0043226 organelle; G…		K02267	COX6B; cytochrome c oxidase subunit 6b	chx00190 Oxidative phosphorylation - Capra hircus (goat); chx01100 Metabolic pathways - Capra hircus (goat); chx04260 Cardiac muscle contraction - Capra hircus (goat); chx04714 Thermogenesis - Capra hircus (goat); chx04932 Non-alcoholic fatty liver disease (NAFLD) - Capra hircus (goat); chx05010 Alzheimer disease - Capra hircus (goat); chx05012 Parkinson disease - Capra hircus (goat); chx05016 Hu…	PF02297	Cytochrome oxidase c subunit VIb
A0A452F2V9	V-type proton ATPase subunit C(predicted) OS=Capra hircus OX=9925 GN=ATP6V1C1 PE=4 SV=1	1.601	Up	0.00067826	ATP6V1C1	43.959	39	16	24	16	0.723	0.873	0.773	0.769	0.819	1.354	1.618	1.007	1.167	1.19	cytoplasm	GO:0000041 transition metal ion transport; GO:0006810 transport; GO:0006811 ion transport; GO:0006812 cation transport; GO:0006826 iron ion transport; GO:0007154 cell communication; GO:0007165 signal transduction; GO:0007166 cell surface receptor signaling pathway; GO:0007167 enzyme linked receptor protein signaling pathway; GO:0007169 transmembrane receptor protein tyrosine kinase signaling path…	GO:0000221 vacuolar proton-transporting V-type ATPase, V1 domain; GO:0000323 lytic vacuole; GO:0005622 intracellular; GO:0005623 cell; GO:0005737 cytoplasm; GO:0005764 lysosome; GO:0005765 lysosomal membrane; GO:0005773 vacuole; GO:0005774 vacuolar membrane; GO:0005829 cytosol; GO:0005886 plasma membrane; GO:0016020 membrane; GO:0016469 proton-transporting two-sector ATPase complex; GO:0016471 va…	GO:0003824 catalytic activity; GO:0005215 transporter activity; GO:0008324 cation transmembrane transporter activity; GO:0008553 hydrogen-exporting ATPase activity, phosphorylative mechanism; GO:0015075 ion transmembrane transporter activity; GO:0015077 monovalent inorganic cation transmembrane transporter activity; GO:0015078 hydrogen ion transmembrane transporter activity; GO:0015318 inorganic …	K02148	ATPeV1C, ATP6C; V-type H+-transporting ATPase subunit C	chx00190 Oxidative phosphorylation - Capra hircus (goat); chx01100 Metabolic pathways - Capra hircus (goat); chx04145 Phagosome - Capra hircus (goat); chx04150 mTOR signaling pathway - Capra hircus (goat); chx04721 Synaptic vesicle cycle - Capra hircus (goat); chx04966 Collecting duct acid secretion - Capra hircus (goat); chx05165 Human papillomavirus infection - Capra hircus (goat); chx05323 Rhe…
A0A452DNJ5	Maestro heat like repeat family member 2B(predicted) OS=Capra hircus OX=9925 PE=4 SV=1	1.801	Up	0.000123633	---	66.927	21	14	25	14	0.719	0.721	0.864	0.658	0.725	1.036	1.49	1.25	1.306	1.558	endoplasmic reticulum	GO:0007154 cell communication; GO:0007165 signal transduction; GO:0009987 cellular process; GO:0010737 protein kinase A signaling; GO:0023052 signaling; GO:0035556 intracellular signal transduction; GO:0050789 regulation of biological process; GO:0050794 regulation of cellular process; GO:0050896 response to stimulus; GO:0051716 cellular response to stimulus; GO:0065007 biological regulation;	GO:0001669 acrosomal vesicle; GO:0005622 intracellular; GO:0005623 cell; GO:0005737 cytoplasm; GO:0005929 cilium; GO:0012505 endomembrane system; GO:0030141 secretory granule; GO:0031410 cytoplasmic vesicle; GO:0031514 motile cilium; GO:0031982 vesicle; GO:0036126 sperm flagellum; GO:0042995 cell projection; GO:0043226 organelle; GO:0043227 membrane-bounded organelle; GO:0043229 intracellular org…
A0A452FIF4	Tektin-5(predicted) OS=Capra hircus OX=9925 GN=TEKT5 PE=4 SV=1	0.428	Down	0.021544	TEKT5	56.487	11	6	7	6	1.491	0.829	2.533	1.565	0.895	0.512	0.654	0.642	0.659	0.661	extracellular	GO:0001539 cilium or flagellum-dependent cell motility; GO:0003341 cilium movement; GO:0006928 movement of cell or subcellular component; GO:0006996 organelle organization; GO:0007017 microtubule-based process; GO:0007018 microtubule-based movement; GO:0009987 cellular process; GO:0016043 cellular component organization; GO:0022607 cellular component assembly; GO:0030030 cell projection organizat…	GO:0005622 intracellular; GO:0005623 cell; GO:0005634 nucleus; GO:0005929 cilium; GO:0031514 motile cilium; GO:0036126 sperm flagellum; GO:0042995 cell projection; GO:0043226 organelle; GO:0043227 membrane-bounded organelle; GO:0043229 intracellular organelle; GO:0043231 intracellular membrane-bounded organelle; GO:0044424 intracellular part; GO:0044464 cell part; GO:0097223 sperm part; GO:009772…		K18632	TEKT5; tektin-5
A0A452EFP3	Sperm equatorial segment protein 1(predicted) OS=Capra hircus OX=9925 GN=SPESP1 PE=4 SV=1	0.513	Down	8.3548e-05	SPESP1	41.35	40.9	15	32	15	1.457	1.542	1.051	1.137	1.481	0.622	0.636	0.676	0.679	0.811	extracellular	GO:0000003 reproduction; GO:0007338 single fertilization; GO:0007340 acrosome reaction; GO:0007342 fusion of sperm to egg plasma membrane; GO:0008037 cell recognition; GO:0009566 fertilization; GO:0009987 cellular process; GO:0009988 cell-cell recognition; GO:0016043 cellular component organization; GO:0019953 sexual reproduction; GO:0022412 cellular process involved in reproduction in multicellu…	GO:0001669 acrosomal vesicle; GO:0005622 intracellular; GO:0005623 cell; GO:0005737 cytoplasm; GO:0012505 endomembrane system; GO:0030141 secretory granule; GO:0031410 cytoplasmic vesicle; GO:0031982 vesicle; GO:0043226 organelle; GO:0043227 membrane-bounded organelle; GO:0043229 intracellular organelle; GO:0044424 intracellular part; GO:0044444 cytoplasmic part; GO:0044464 cell part; GO:0097223 …
I1VE56	RAS oncogene protein OS=Capra hircus OX=9925 GN=RAB8A PE=2 SV=1	1.913	Up	6.0978e-05	RAB8A	23.684	44.4	10	13	8	0.693	0.729	0.807	0.638	0.719	1.539	1.66	1.155	1.142	1.363	cytoplasm	GO:0000902 cell morphogenesis; GO:0000904 cell morphogenesis involved in differentiation; GO:0002790 peptide secretion; GO:0006464 cellular protein modification process; GO:0006807 nitrogen compound metabolic process; GO:0006810 transport; GO:0006886 intracellular protein transport; GO:0006887 exocytosis; GO:0006904 vesicle docking involved in exocytosis; GO:0006906 vesicle fusion; GO:0006996 org…	GO:0000139 Golgi membrane; GO:0005622 intracellular; GO:0005623 cell; GO:0005737 cytoplasm; GO:0005768 endosome; GO:0005794 Golgi apparatus; GO:0005798 Golgi-associated vesicle; GO:0005802 trans-Golgi network; GO:0005813 centrosome; GO:0005815 microtubule organizing center; GO:0005829 cytosol; GO:0005856 cytoskeleton; GO:0005886 plasma membrane; GO:0005929 cilium; GO:0008021 synaptic vesicle; GO:…	GO:0000166 nucleotide binding; GO:0001882 nucleoside binding; GO:0001883 purine nucleoside binding; GO:0003824 catalytic activity; GO:0003924 GTPase activity; GO:0005488 binding; GO:0005515 protein binding; GO:0005525 GTP binding; GO:0008092 cytoskeletal protein binding; GO:0016462 pyrophosphatase activity; GO:0016787 hydrolase activity; GO:0016817 hydrolase activity, acting on acid anhydrides; G…	K07901	RAB8A, MEL; Ras-related protein Rab-8A	chx04140 Autophagy - animal - Capra hircus (goat); chx04144 Endocytosis - Capra hircus (goat); chx04152 AMPK signaling pathway - Capra hircus (goat); chx04530 Tight junction - Capra hircus (goat); chx04972 Pancreatic secretion - Capra hircus (goat);	PF00071	Ras family
A0A452DP54	Bridging integrator 2(predicted) OS=Capra hircus OX=9925 GN=BIN2 PE=4 SV=1	1.798	Up	0.0026781	BIN2	55.038	15.2	6	6	1	0.79	0.798	0.602	0.787	0.72	1.455	1.591	0.832	1.208	1.562	cytoplasm	GO:0001775 cell activation; GO:0002252 immune effector process; GO:0002263 cell activation involved in immune response; GO:0002274 myeloid leukocyte activation; GO:0002275 myeloid cell activation involved in immune response; GO:0002283 neutrophil activation involved in immune response; GO:0002366 leukocyte activation involved in immune response; GO:0002376 immune system process; GO:0002443 leukoc…	GO:0002102 podosome; GO:0005576 extracellular region; GO:0005622 intracellular; GO:0005623 cell; GO:0005737 cytoplasm; GO:0005856 cytoskeleton; GO:0012505 endomembrane system; GO:0015629 actin cytoskeleton; GO:0030141 secretory granule; GO:0031410 cytoplasmic vesicle; GO:0031974 membrane-enclosed lumen; GO:0031982 vesicle; GO:0031983 vesicle lumen; GO:0032991 macromolecular complex; GO:0034774 se…	GO:0005488 binding; GO:0005543 phospholipid binding; GO:0008289 lipid binding; GO:0043167 ion binding; GO:0043168 anion binding;	K20119	BIN2; bridging integrator 2		PF03114	BAR domain
A0A452E2P8	GLIPR1-like protein 2 (Fragment)(predicted) OS=Capra hircus OX=9925 GN=GLIPR1L2 PE=4 SV=1	0.663	Down	0.00037993	GLIPR1L2	28.847	22.6	4	4	4	1.235	1.195	1.45	1.155	1.248	0.75	0.783	0.847	0.755	1.031	cytoplasm							PF00188	Cysteine-rich secretory protein family
A0A452EH85	Xaa-Pro aminopeptidase 1 (Fragment)(predicted) OS=Capra hircus OX=9925 GN=XPNPEP1 PE=4 SV=1	1.874	Up	5.9982e-05	XPNPEP1	68.278	9.5	5	6	5	0.707	0.806	0.716	0.746	0.679	1.648	1.278	1.053	1.389	1.481	mitochondria	GO:0006508 proteolysis; GO:0006518 peptide metabolic process; GO:0006807 nitrogen compound metabolic process; GO:0008152 metabolic process; GO:0009056 catabolic process; GO:0009987 cellular process; GO:0010815 bradykinin catabolic process; GO:0017144 drug metabolic process; GO:0019538 protein metabolic process; GO:0034641 cellular nitrogen compound metabolic process; GO:0042737 drug catabolic pro…		GO:0003824 catalytic activity; GO:0004177 aminopeptidase activity; GO:0005488 binding; GO:0008233 peptidase activity; GO:0008235 metalloexopeptidase activity; GO:0008237 metallopeptidase activity; GO:0008238 exopeptidase activity; GO:0016787 hydrolase activity; GO:0030145 manganese ion binding; GO:0043167 ion binding; GO:0043169 cation binding; GO:0046872 metal ion binding; GO:0046914 transition …	K01262	pepP; Xaa-Pro aminopeptidase [EC:3.4.11.9]		PF01321; PF00557	Creatinase/Prolidase N-terminal domain; Metallopeptidase family M24
A0A452DZU0	Serpin A3-7 (Fragment)(predicted) OS=Capra hircus OX=9925 GN=LOC102174926 PE=4 SV=1	0.638	Down	0.0086615	LOC102174926	52.671	27.2	14	28	12	1.069	1.262	1.762	1.065	1.26	0.698	0.726	1.155	0.79	0.727	mitochondria	GO:0001775 cell activation; GO:0001894 tissue homeostasis; GO:0002237 response to molecule of bacterial origin; GO:0002252 immune effector process; GO:0002263 cell activation involved in immune response; GO:0002274 myeloid leukocyte activation; GO:0002275 myeloid cell activation involved in immune response; GO:0002283 neutrophil activation involved in immune response; GO:0002366 leukocyte activat…	GO:0000323 lytic vacuole; GO:0005576 extracellular region; GO:0005615 extracellular space; GO:0005622 intracellular; GO:0005623 cell; GO:0005634 nucleus; GO:0005737 cytoplasm; GO:0005764 lysosome; GO:0005766 primary lysosome; GO:0005773 vacuole; GO:0005775 vacuolar lumen; GO:0012505 endomembrane system; GO:0030141 secretory granule; GO:0031091 platelet alpha granule; GO:0031093 platelet alpha gra…	GO:0003676 nucleic acid binding; GO:0003677 DNA binding; GO:0004857 enzyme inhibitor activity; GO:0004866 endopeptidase inhibitor activity; GO:0004867 serine-type endopeptidase inhibitor activity; GO:0005488 binding; GO:0030234 enzyme regulator activity; GO:0030414 peptidase inhibitor activity; GO:0061134 peptidase regulator activity; GO:0061135 endopeptidase regulator activity; GO:0097159 organi…	K04525	SERPINA; serpin peptidase inhibitor, clade A		PF00079	Serpin (serine protease inhibitor)
A0A452E5S2	Exocyst complex component 7(predicted) OS=Capra hircus OX=9925 GN=EXOC7 PE=4 SV=1	0.487	Down	0.028761	EXOC7	74.847	1.5	1	1	1	2.035	0.646	1.012	2.118	1.172	0.764	0.618	0.502	0.681	0.836	nucleus	GO:0006810 transport; GO:0006887 exocytosis; GO:0009987 cellular process; GO:0016192 vesicle-mediated transport; GO:0032940 secretion by cell; GO:0043900 regulation of multi-organism process; GO:0043903 regulation of symbiosis, encompassing mutualism through parasitism; GO:0046903 secretion; GO:0050789 regulation of biological process; GO:0051179 localization; GO:0051234 establishment of localiza…	GO:0005622 intracellular; GO:0005623 cell; GO:0005737 cytoplasm; GO:0005813 centrosome; GO:0005815 microtubule organizing center; GO:0005856 cytoskeleton; GO:0005886 plasma membrane; GO:0015630 microtubule cytoskeleton; GO:0016020 membrane; GO:0030424 axon; GO:0030426 growth cone; GO:0030427 site of polarized growth; GO:0032584 growth cone membrane; GO:0033267 axon part; GO:0034451 centriolar sat…		K07195	EXOC7, EXO70; exocyst complex component 7	chx04910 Insulin signaling pathway - Capra hircus (goat);
C6ZEA3	Sperm-egg fusion 1 OS=Capra hircus OX=9925 GN=Izumo1 PE=4 SV=1	0.35	Down	7.9353e-08	Izumo1	33.637	48.1	12	22	12	1.713	1.428	1.513	1.544	1.426	0.433	0.546	0.542	0.568	0.582	extracellular	GO:0000003 reproduction; GO:0007155 cell adhesion; GO:0007338 single fertilization; GO:0007342 fusion of sperm to egg plasma membrane; GO:0008037 cell recognition; GO:0009566 fertilization; GO:0009987 cellular process; GO:0009988 cell-cell recognition; GO:0016043 cellular component organization; GO:0019953 sexual reproduction; GO:0022412 cellular process involved in reproduction in multicellular …	GO:0001669 acrosomal vesicle; GO:0002080 acrosomal membrane; GO:0005622 intracellular; GO:0005623 cell; GO:0005737 cytoplasm; GO:0005886 plasma membrane; GO:0012505 endomembrane system; GO:0012506 vesicle membrane; GO:0016020 membrane; GO:0016021 integral component of membrane; GO:0030141 secretory granule; GO:0030659 cytoplasmic vesicle membrane; GO:0030667 secretory granule membrane; GO:0031090…	GO:0005102 receptor binding; GO:0005488 binding; GO:0005515 protein binding; GO:0042802 identical protein binding; GO:0042803 protein homodimerization activity; GO:0046983 protein dimerization activity; GO:0086080 protein binding involved in heterotypic cell-cell adhesion; GO:0098631 protein binding involved in cell adhesion; GO:0098632 protein binding involved in cell-cell adhesion;
A0A452GAQ2	Protein tyrosine phosphatase, receptor type S(predicted) OS=Capra hircus OX=9925 GN=PTPRS PE=4 SV=1	0.607	Down	0.0097972	PTPRS	210.88	2.2	2	2	2	1.303	0.978	1.399	1.386	1.432	1.06	0.955	0.661	0.787	0.483	cytoplasm				K06778	PTPRS; receptor-type tyrosine-protein phosphatase S [EC:3.1.3.48]		PF07679; PF00041; PF00102	Immunoglobulin I-set domain; Fibronectin type III domain; Protein-tyrosine phosphatase
A0A452FZP2	Isochorismatase domain-containing protein 2(predicted) OS=Capra hircus OX=9925 GN=ISOC2 PE=4 SV=1	0.652	Down	0.0045617	ISOC2	22.431	28.9	4	11	4	1.541	1.22	1.131	1.387	0.992	0.715	0.668	0.765	0.931	1.009	mitochondria	GO:0031647 regulation of protein stability; GO:0031648 protein destabilization; GO:0065007 biological regulation; GO:0065008 regulation of biological quality;	GO:0005622 intracellular; GO:0005623 cell; GO:0005634 nucleus; GO:0005737 cytoplasm; GO:0043226 organelle; GO:0043227 membrane-bounded organelle; GO:0043229 intracellular organelle; GO:0043231 intracellular membrane-bounded organelle; GO:0044424 intracellular part; GO:0044464 cell part;
A0A452FF98	Hormone-sensitive lipase (Fragment)(predicted) OS=Capra hircus OX=9925 GN=LIPE PE=4 SV=1	1.786	Up	0.00099932	LIPE	82.635	31.2	20	26	20	0.741	0.746	0.706	0.764	0.701	1.151	1.448	1.117	1.26	1.556	nucleus	GO:0000003 reproduction; GO:0001676 long-chain fatty acid metabolic process; GO:0006082 organic acid metabolic process; GO:0006139 nucleobase-containing compound metabolic process; GO:0006351 transcription, DNA-templated; GO:0006352 DNA-templated transcription, initiation; GO:0006353 DNA-templated transcription, termination; GO:0006360 transcription from RNA polymerase I promoter; GO:0006361 tran…	GO:0005576 extracellular region; GO:0005615 extracellular space; GO:0005622 intracellular; GO:0005623 cell; GO:0005634 nucleus; GO:0005737 cytoplasm; GO:0005739 mitochondrion; GO:0005811 lipid particle; GO:0005829 cytosol; GO:0005886 plasma membrane; GO:0005901 caveola; GO:0016020 membrane; GO:0043226 organelle; GO:0043227 membrane-bounded organelle; GO:0043228 non-membrane-bounded organelle; GO:…	GO:0003676 nucleic acid binding; GO:0003723 RNA binding; GO:0003824 catalytic activity; GO:0004806 triglyceride lipase activity; GO:0005488 binding; GO:0005515 protein binding; GO:0016298 lipase activity; GO:0016787 hydrolase activity; GO:0016788 hydrolase activity, acting on ester bonds; GO:0017171 serine hydrolase activity; GO:0019843 rRNA binding; GO:0019899 enzyme binding; GO:0019900 kinase b…	K07188	LIPE, HSL; hormone-sensitive lipase [EC:3.1.1.79]	chx04024 cAMP signaling pathway - Capra hircus (goat); chx04152 AMPK signaling pathway - Capra hircus (goat); chx04371 Apelin signaling pathway - Capra hircus (goat); chx04714 Thermogenesis - Capra hircus (goat); chx04910 Insulin signaling pathway - Capra hircus (goat); chx04923 Regulation of lipolysis in adipocytes - Capra hircus (goat); chx04925 Aldosterone synthesis and secretion - Capra hircu…	PF07859	alpha/beta hydrolase fold
A0A452EY83	DnaJ (Hsp40) homolog, subfamily B, member 2(predicted) OS=Capra hircus OX=9925 GN=DNAJB2 PE=4 SV=1	1.864	Up	0.00043531	DNAJB2	30.741	20.9	6	7	6	0.763	0.771	0.604	0.705	0.659	1.282	1.715	0.957	1.187	1.387	nucleus	GO:0001558 regulation of cell growth; GO:0006457 protein folding; GO:0006508 proteolysis; GO:0006511 ubiquitin-dependent protein catabolic process; GO:0006807 nitrogen compound metabolic process; GO:0006950 response to stress; GO:0006986 response to unfolded protein; GO:0008152 metabolic process; GO:0008285 negative regulation of cell proliferation; GO:0009056 catabolic process; GO:0009057 macrom…	GO:0005622 intracellular; GO:0005623 cell; GO:0005634 nucleus; GO:0005635 nuclear envelope; GO:0005737 cytoplasm; GO:0005783 endoplasmic reticulum; GO:0005789 endoplasmic reticulum membrane; GO:0005829 cytosol; GO:0012505 endomembrane system; GO:0016020 membrane; GO:0016234 inclusion body; GO:0019898 extrinsic component of membrane; GO:0031090 organelle membrane; GO:0031224 intrinsic component of…	GO:0001671 ATPase activator activity; GO:0005488 binding; GO:0005515 protein binding; GO:0008047 enzyme activator activity; GO:0019899 enzyme binding; GO:0030234 enzyme regulator activity; GO:0030544 Hsp70 protein binding; GO:0031072 heat shock protein binding; GO:0031593 polyubiquitin binding; GO:0031625 ubiquitin protein ligase binding; GO:0032182 ubiquitin-like protein binding; GO:0043130 ubiq…	K09508	DNAJB2; DnaJ homolog subfamily B member 2	chx04141 Protein processing in endoplasmic reticulum - Capra hircus (goat);	PF00226	DnaJ domain
A0A452DU41	Protein phosphatase inhibitor 2(predicted) OS=Capra hircus OX=9925 GN=PPP1R2 PE=4 SV=1	1.703	Up	0.0192995	PPP1R2	22.995	33.3	5	5	5	0.722	0.796	0.886	0.771	0.615	1.974	1.559	0.835	0.996	1.09	nucleus	GO:0009892 negative regulation of metabolic process; GO:0010563 negative regulation of phosphorus metabolic process; GO:0010605 negative regulation of macromolecule metabolic process; GO:0010921 regulation of phosphatase activity; GO:0010923 negative regulation of phosphatase activity; GO:0019220 regulation of phosphate metabolic process; GO:0019222 regulation of metabolic process; GO:0031323 reg…	GO:0000164 protein phosphatase type 1 complex; GO:0005622 intracellular; GO:0005623 cell; GO:0005737 cytoplasm; GO:0008287 protein serine/threonine phosphatase complex; GO:0030424 axon; GO:0030425 dendrite; GO:0030426 growth cone; GO:0030427 site of polarized growth; GO:0032991 macromolecular complex; GO:0033267 axon part; GO:0036477 somatodendritic compartment; GO:0042995 cell projection; GO:004…	GO:0004857 enzyme inhibitor activity; GO:0004864 protein phosphatase inhibitor activity; GO:0005488 binding; GO:0005515 protein binding; GO:0019208 phosphatase regulator activity; GO:0019212 phosphatase inhibitor activity; GO:0019888 protein phosphatase regulator activity; GO:0019904 protein domain specific binding; GO:0030234 enzyme regulator activity; GO:0098772 molecular function regulator;	K16833	PPP1R2, IPP2; protein phosphatase inhibitor 2
A0A452FX42	40S ribosomal protein S9(predicted) OS=Capra hircus OX=9925 GN=RPS9 PE=4 SV=1	0.513	Down	0.042581	RPS9	22.591	16	4	5	4	1.705	0.737	1.091	2.206	0.961	0.749	0.651	0.698	0.72	0.62	cytoplasm	GO:0000184 nuclear-transcribed mRNA catabolic process, nonsense-mediated decay; GO:0000956 nuclear-transcribed mRNA catabolic process; GO:0006139 nucleobase-containing compound metabolic process; GO:0006364 rRNA processing; GO:0006396 RNA processing; GO:0006401 RNA catabolic process; GO:0006402 mRNA catabolic process; GO:0006412 translation; GO:0006413 translational initiation; GO:0006417 regulat…	GO:0005622 intracellular; GO:0005623 cell; GO:0005634 nucleus; GO:0005654 nucleoplasm; GO:0005730 nucleolus; GO:0005737 cytoplasm; GO:0005829 cytosol; GO:0005840 ribosome; GO:0015935 small ribosomal subunit; GO:0022626 cytosolic ribosome; GO:0022627 cytosolic small ribosomal subunit; GO:0031974 membrane-enclosed lumen; GO:0031981 nuclear lumen; GO:0032991 macromolecular complex; GO:0043226 organe…	GO:0003676 nucleic acid binding; GO:0003723 RNA binding; GO:0003735 structural constituent of ribosome; GO:0005198 structural molecule activity; GO:0005488 binding; GO:0019843 rRNA binding; GO:0045182 translation regulator activity; GO:0097159 organic cyclic compound binding; GO:1901363 heterocyclic compound binding; GO:1990932 5.8S rRNA binding;	K02997	RP-S9e, RPS9; small subunit ribosomal protein S9e	chx03010 Ribosome - Capra hircus (goat);	PF01479	S4 domain
A0A452ELH1	Testis-expressed protein 29(predicted) OS=Capra hircus OX=9925 GN=TEX29 PE=4 SV=1	0.524	Down	2.4826e-05	TEX29	16.287	25.9	6	7	6	1.558	1.293	1.208	1.352	1.342	0.687	0.88	0.62	0.733	0.62	cytoplasm
A0A452DS87	Uncharacterized protein OS=Capra hircus OX=9925 PE=4 SV=1	0.577	Down	0.00182103	---	10.442	13.5	1	1	1	1.41	1.359	1.009	1.431	1.419	0.906	0.667	0.816	0.906	0.53	extracellular
A0A452EB31	Wnt inhibitory factor 1(predicted) OS=Capra hircus OX=9925 GN=WIF1 PE=4 SV=1	0.493	Down	0.0038042	WIF1	41.509	9.2	3	4	3	1.832	1.124	1.069	2.019	0.948	0.535	0.674	0.758	0.722	0.755	extracellular	GO:0007154 cell communication; GO:0007165 signal transduction; GO:0009966 regulation of signal transduction; GO:0009968 negative regulation of signal transduction; GO:0009987 cellular process; GO:0010646 regulation of cell communication; GO:0010648 negative regulation of cell communication; GO:0023051 regulation of signaling; GO:0023052 signaling; GO:0023057 negative regulation of signaling; GO:0…	GO:0005576 extracellular region;	GO:0005488 binding; GO:0005515 protein binding; GO:0017147 Wnt-protein binding;	K01691	WIF1; WNT inhibitory factor 1	chx04310 Wnt signaling pathway - Capra hircus (goat);	PF12661	Human growth factor-like EGF
A0A452G0B9	Sperm associated antigen 6(predicted) OS=Capra hircus OX=9925 GN=SPAG6 PE=4 SV=1	0.563	Down	0.00043926	SPAG6	55.443	11.2	5	8	5	1.756	1.21	1.092	1.34	1.264	0.63	0.695	0.872	0.722	0.829	mitochondria	GO:0000003 reproduction; GO:0000226 microtubule cytoskeleton organization; GO:0001578 microtubule bundle formation; GO:0003006 developmental process involved in reproduction; GO:0006928 movement of cell or subcellular component; GO:0006996 organelle organization; GO:0007010 cytoskeleton organization; GO:0007017 microtubule-based process; GO:0007275 multicellular organism development; GO:0007276 g…	GO:0005622 intracellular; GO:0005623 cell; GO:0005737 cytoplasm; GO:0005856 cytoskeleton; GO:0005929 cilium; GO:0005930 axoneme; GO:0015630 microtubule cytoskeleton; GO:0031514 motile cilium; GO:0032838 cell projection cytoplasm; GO:0036126 sperm flagellum; GO:0042995 cell projection; GO:0043226 organelle; GO:0043228 non-membrane-bounded organelle; GO:0043229 intracellular organelle; GO:0043232 i…
A0A452FZ12	Disintegrin and metalloproteinase domain-containing protein 1a (Fragment)(predicted) OS=Capra hircus OX=9925 PE=4 SV=1	0.621	Down	0.0036771	---	87.835	23.6	19	66	19	1.359	1.1	1.017	1.365	1.432	0.96	0.892	0.547	0.7	0.794	plasma membrane	GO:0000003 reproduction; GO:0006508 proteolysis; GO:0006807 nitrogen compound metabolic process; GO:0007276 gamete generation; GO:0007283 spermatogenesis; GO:0007338 single fertilization; GO:0007339 binding of sperm to zona pellucida; GO:0007342 fusion of sperm to egg plasma membrane; GO:0008037 cell recognition; GO:0008152 metabolic process; GO:0009566 fertilization; GO:0009987 cellular process;…	GO:0016020 membrane; GO:0016021 integral component of membrane; GO:0031224 intrinsic component of membrane; GO:0044425 membrane part; GO:0045121 membrane raft; GO:0098589 membrane region; GO:0098805 whole membrane; GO:0098857 membrane microdomain;	GO:0003824 catalytic activity; GO:0008233 peptidase activity; GO:0008237 metallopeptidase activity; GO:0016787 hydrolase activity; GO:0070011 peptidase activity, acting on L-amino acid peptides;	K08607	ADAM1; disintegrin and metalloproteinase domain-containing protein 1 [EC:3.4.24.-]		PF01421; PF00200	Reprolysin (M12B) family zinc metalloprotease ; Disintegrin
A0A452EYV3	Kelch-like protein 10(predicted) OS=Capra hircus OX=9925 GN=KLHL10 PE=4 SV=1	1.522	Up	8.3224e-05	KLHL10	68.102	48.6	29	46	29	0.83	0.82	0.745	0.916	0.761	1.308	1.418	1.099	1.171	1.201	cytoplasm	GO:0000003 reproduction; GO:0000902 cell morphogenesis; GO:0001894 tissue homeostasis; GO:0003006 developmental process involved in reproduction; GO:0007275 multicellular organism development; GO:0007276 gamete generation; GO:0007281 germ cell development; GO:0007283 spermatogenesis; GO:0007286 spermatid development; GO:0007548 sex differentiation; GO:0008406 gonad development; GO:0008584 male go…	GO:0000151 ubiquitin ligase complex; GO:0005622 intracellular; GO:0005623 cell; GO:0005737 cytoplasm; GO:0031461 cullin-RING ubiquitin ligase complex; GO:0031463 Cul3-RING ubiquitin ligase complex; GO:0032991 macromolecular complex; GO:0044424 intracellular part; GO:0044464 cell part; GO:1902494 catalytic complex; GO:1990234 transferase complex;		K10448	KLHL10; kelch-like protein 10		PF00651; PF07707	BTB/POZ domain; BTB And C-terminal Kelch
A0A452E5B4	Peroxiredoxin(predicted) OS=Capra hircus OX=9925 GN=PRDX5 PE=4 SV=1	1.531	Up	0.034537	PRDX5	22.457	48.1	10	25	10	1.085	0.73	0.557	0.928	0.706	1.619	1.488	0.839	1.026	1.162	mitochondria	GO:0000302 response to reactive oxygen species; GO:0001894 tissue homeostasis; GO:0006139 nucleobase-containing compound metabolic process; GO:0006355 regulation of transcription, DNA-templated; GO:0006359 regulation of transcription from RNA polymerase III promoter; GO:0006725 cellular aromatic compound metabolic process; GO:0006732 coenzyme metabolic process; GO:0006733 oxidoreduction coenzyme …	GO:0005622 intracellular; GO:0005623 cell; GO:0005634 nucleus; GO:0005737 cytoplasm; GO:0005739 mitochondrion; GO:0005777 peroxisome; GO:0005782 peroxisomal matrix; GO:0005829 cytosol; GO:0031410 cytoplasmic vesicle; GO:0031907 microbody lumen; GO:0031974 membrane-enclosed lumen; GO:0031982 vesicle; GO:0042579 microbody; GO:0043226 organelle; GO:0043227 membrane-bounded organelle; GO:0043229 intr…	GO:0001016 RNA polymerase III regulatory region DNA binding; GO:0001067 regulatory region nucleic acid binding; GO:0003676 nucleic acid binding; GO:0003677 DNA binding; GO:0003824 catalytic activity; GO:0004601 peroxidase activity; GO:0004857 enzyme inhibitor activity; GO:0004866 endopeptidase inhibitor activity; GO:0004869 cysteine-type endopeptidase inhibitor activity; GO:0005102 receptor bindi…	K11187	PRDX5; peroxiredoxin 5, atypical 2-Cys peroxiredoxin [EC:1.11.1.15]	chx04146 Peroxisome - Capra hircus (goat);	PF08534	Redoxin
A0A452DLM2	Spermadhesin-1(predicted) OS=Capra hircus OX=9925 GN=LOC102175091 PE=4 SV=1	1.752	Up	0.022101	LOC102175091	14.978	78.4	9	57	9	0.701	0.751	0.612	0.741	0.906	1.981	1.524	0.867	1.317	0.811	extracellular							PF00431	CUB domain
A0A452GAE1	Sperm flagellar protein 2(predicted) OS=Capra hircus OX=9925 GN=SPEF2 PE=4 SV=1	0.648	Down	0.032524	SPEF2	200.14	2.3	4	4	4	1.089	1.467	0.942	0.908	1.909	0.934	0.952	0.718	0.721	0.77	nucleus	GO:0000003 reproduction; GO:0000226 microtubule cytoskeleton organization; GO:0001501 skeletal system development; GO:0001578 microtubule bundle formation; GO:0003006 developmental process involved in reproduction; GO:0003341 cilium movement; GO:0003351 epithelial cilium movement; GO:0006928 movement of cell or subcellular component; GO:0006996 organelle organization; GO:0007010 cytoskeleton orga…	GO:0002177 manchette; GO:0005622 intracellular; GO:0005623 cell; GO:0005737 cytoplasm; GO:0005794 Golgi apparatus; GO:0005856 cytoskeleton; GO:0005929 cilium; GO:0012505 endomembrane system; GO:0015630 microtubule cytoskeleton; GO:0031514 motile cilium; GO:0036126 sperm flagellum; GO:0042995 cell projection; GO:0043226 organelle; GO:0043227 membrane-bounded organelle; GO:0043228 non-membrane-boun…					PF06294; PF00406	Domain of Unknown Function (DUF1042); Adenylate kinase
A0A452G4N8	Phosphoinositide phospholipase C(predicted) OS=Capra hircus OX=9925 GN=PLCZ1 PE=4 SV=1	0.655	Down	0.0056793	PLCZ1	73.402	9	6	6	6	1.659	1.051	1.11	1.233	1.26	0.804	1.056	0.632	0.813	0.827	cytoplasm	GO:0000003 reproduction; GO:0001775 cell activation; GO:0006066 alcohol metabolic process; GO:0006793 phosphorus metabolic process; GO:0006796 phosphate-containing compound metabolic process; GO:0006810 transport; GO:0006811 ion transport; GO:0006812 cation transport; GO:0006816 calcium ion transport; GO:0006873 cellular ion homeostasis; GO:0006874 cellular calcium ion homeostasis; GO:0006875 cel…	GO:0005622 intracellular; GO:0005623 cell; GO:0005634 nucleus; GO:0005654 nucleoplasm; GO:0005730 nucleolus; GO:0005737 cytoplasm; GO:0005829 cytosol; GO:0031974 membrane-enclosed lumen; GO:0031981 nuclear lumen; GO:0043226 organelle; GO:0043227 membrane-bounded organelle; GO:0043228 non-membrane-bounded organelle; GO:0043229 intracellular organelle; GO:0043231 intracellular membrane-bounded orga…	GO:0003824 catalytic activity; GO:0004435 phosphatidylinositol phospholipase C activity; GO:0004620 phospholipase activity; GO:0004629 phospholipase C activity; GO:0005488 binding; GO:0005543 phospholipid binding; GO:0005546 phosphatidylinositol-4,5-bisphosphate binding; GO:0008081 phosphoric diester hydrolase activity; GO:0008289 lipid binding; GO:0010314 phosphatidylinositol-5-phosphate binding…	K05861	PLCZ; phosphatidylinositol phospholipase C, zeta [EC:3.1.4.11]	chx00562 Inositol phosphate metabolism - Capra hircus (goat); chx01100 Metabolic pathways - Capra hircus (goat); chx04020 Calcium signaling pathway - Capra hircus (goat); chx04070 Phosphatidylinositol signaling system - Capra hircus (goat); chx04114 Oocyte meiosis - Capra hircus (goat); chx04919 Thyroid hormone signaling pathway - Capra hircus (goat);	PF09279; PF00168	Phosphoinositide-specific phospholipase C, efhand-like; C2 domain
A0A452F2B0	Disintegrin and metalloproteinase domain-containing protein 18(predicted) OS=Capra hircus OX=9925 GN=LOC108634067 PE=4 SV=1	0.477	Down	4.4514e-05	LOC108634067	71.757	26.1	16	38	15	1.504	1.092	1.568	1.391	1.466	0.769	0.656	0.531	0.628	0.767	extracellular	GO:0000003 reproduction; GO:0006928 movement of cell or subcellular component; GO:0007338 single fertilization; GO:0007339 binding of sperm to zona pellucida; GO:0008037 cell recognition; GO:0009566 fertilization; GO:0009893 positive regulation of metabolic process; GO:0009987 cellular process; GO:0009988 cell-cell recognition; GO:0010468 regulation of gene expression; GO:0010604 positive regulat…	GO:0005623 cell; GO:0005886 plasma membrane; GO:0009986 cell surface; GO:0016020 membrane; GO:0032991 macromolecular complex; GO:0044425 membrane part; GO:0044464 cell part; GO:0045121 membrane raft; GO:0061827 sperm head; GO:0071944 cell periphery; GO:0097223 sperm part; GO:0098589 membrane region; GO:0098805 whole membrane; GO:0098857 membrane microdomain;					PF01421; PF00200	Reprolysin (M12B) family zinc metalloprotease ; Disintegrin
A0A452E8W4	Glycerol-3-phosphate dehydrogenase [NAD(+)](predicted) OS=Capra hircus OX=9925 PE=4 SV=1	0.561	Down	0.00104028	---	38.266	34.8	11	22	7	1.449	1.564	0.925	1.401	1.329	0.589	0.877	0.721	0.821	0.735	cytoplasm	GO:0001508 action potential; GO:0001932 regulation of protein phosphorylation; GO:0001933 negative regulation of protein phosphorylation; GO:0002027 regulation of heart rate; GO:0002028 regulation of sodium ion transport; GO:0003008 system process; GO:0003012 muscle system process; GO:0003013 circulatory system process; GO:0003015 heart process; GO:0003254 regulation of membrane depolarization; G…	GO:0005622 intracellular; GO:0005623 cell; GO:0005737 cytoplasm; GO:0005829 cytosol; GO:0005886 plasma membrane; GO:0016020 membrane; GO:0044424 intracellular part; GO:0044444 cytoplasmic part; GO:0044464 cell part; GO:0071944 cell periphery;	GO:0003824 catalytic activity; GO:0004367 glycerol-3-phosphate dehydrogenase [NAD+] activity; GO:0005488 binding; GO:0005515 protein binding; GO:0016247 channel regulator activity; GO:0016491 oxidoreductase activity; GO:0016614 oxidoreductase activity, acting on CH-OH group of donors; GO:0016616 oxidoreductase activity, acting on the CH-OH group of donors, NAD or NADP as acceptor; GO:0017080 sodi…				PF07479	NAD-dependent glycerol-3-phosphate dehydrogenase C-terminus
E9NST4	Beta-galactosamide alpha-2,6-sialyltranferase 1 OS=Capra hircus OX=9925 GN=ST6GAL1 PE=2 SV=1	1.698	Up	0.0076753	ST6GAL1	46.205	4.7	2	3	2	0.67	0.785	0.762	0.743	0.926	2.081	0.974	1.285	1.125	1.135	extracellular	GO:0002376 immune system process; GO:0005975 carbohydrate metabolic process; GO:0006040 amino sugar metabolic process; GO:0006054 N-acetylneuraminate metabolic process; GO:0006082 organic acid metabolic process; GO:0006464 cellular protein modification process; GO:0006486 protein glycosylation; GO:0006487 protein N-linked glycosylation; GO:0006493 protein O-linked glycosylation; GO:0006807 nitrog…	GO:0000138 Golgi trans cisterna; GO:0000139 Golgi membrane; GO:0005576 extracellular region; GO:0005622 intracellular; GO:0005623 cell; GO:0005737 cytoplasm; GO:0005783 endoplasmic reticulum; GO:0005794 Golgi apparatus; GO:0005795 Golgi stack; GO:0005797 Golgi medial cisterna; GO:0012505 endomembrane system; GO:0016020 membrane; GO:0031090 organelle membrane; GO:0031984 organelle subcompartment; …	GO:0003824 catalytic activity; GO:0003835 beta-galactoside alpha-2,6-sialyltransferase activity; GO:0008373 sialyltransferase activity; GO:0016740 transferase activity; GO:0016757 transferase activity, transferring glycosyl groups;	K00778	SIAT1, ST6GAL1; beta-galactoside alpha-2,6-sialyltransferase (sialyltransferase 1) [EC:2.4.99.1]	chx00510 N-Glycan biosynthesis - Capra hircus (goat); chx00514 Other types of O-glycan biosynthesis - Capra hircus (goat); chx01100 Metabolic pathways - Capra hircus (goat);
A0A452FM75	Huntingtin-interacting protein 1 (Fragment)(predicted) OS=Capra hircus OX=9925 GN=HIP1 PE=4 SV=1	1.521	Up	0.0029797	HIP1	114.11	33	32	56	32	0.851	0.741	0.79	0.925	0.693	1.17	1.586	1.079	0.97	1.279	nucleus	GO:0006810 transport; GO:0006886 intracellular protein transport; GO:0006897 endocytosis; GO:0006898 receptor-mediated endocytosis; GO:0006915 apoptotic process; GO:0006919 activation of cysteine-type endopeptidase activity involved in apoptotic process; GO:0006996 organelle organization; GO:0007010 cytoskeleton organization; GO:0007154 cell communication; GO:0007165 signal transduction; GO:00081…	GO:0005622 intracellular; GO:0005623 cell; GO:0005634 nucleus; GO:0005737 cytoplasm; GO:0005794 Golgi apparatus; GO:0005829 cytosol; GO:0005856 cytoskeleton; GO:0005886 plasma membrane; GO:0009898 cytoplasmic side of plasma membrane; GO:0012505 endomembrane system; GO:0012506 vesicle membrane; GO:0016020 membrane; GO:0019897 extrinsic component of plasma membrane; GO:0019898 extrinsic component o…	GO:0003779 actin binding; GO:0005102 receptor binding; GO:0005154 epidermal growth factor receptor binding; GO:0005198 structural molecule activity; GO:0005200 structural constituent of cytoskeleton; GO:0005488 binding; GO:0005515 protein binding; GO:0005543 phospholipid binding; GO:0008092 cytoskeletal protein binding; GO:0008289 lipid binding; GO:0030276 clathrin binding; GO:0030674 protein bin…	K04559	HIP1; huntingtin interacting protein 1	chx05016 Huntington disease - Capra hircus (goat);	PF07651	ANTH domain
A0A452G0Z3	Dynein intermediate chain 2, axonemal(predicted) OS=Capra hircus OX=9925 GN=DNAI2 PE=4 SV=1	0.32	Down	7.7197e-05	DNAI2	58.279	5.1	3	3	3	2.164	1.424	0.986	1.952	1.36	0.508	0.546	0.44	0.575	0.454	cytoplasm	GO:0000226 microtubule cytoskeleton organization; GO:0001578 microtubule bundle formation; GO:0003341 cilium movement; GO:0006928 movement of cell or subcellular component; GO:0006996 organelle organization; GO:0007010 cytoskeleton organization; GO:0007017 microtubule-based process; GO:0007018 microtubule-based movement; GO:0007275 multicellular organism development; GO:0007368 determination of l…	GO:0005622 intracellular; GO:0005623 cell; GO:0005737 cytoplasm; GO:0005856 cytoskeleton; GO:0005858 axonemal dynein complex; GO:0005875 microtubule associated complex; GO:0005886 plasma membrane; GO:0005929 cilium; GO:0005930 axoneme; GO:0009897 external side of plasma membrane; GO:0009986 cell surface; GO:0015630 microtubule cytoskeleton; GO:0016020 membrane; GO:0030286 dynein complex; GO:00315…	GO:0003774 motor activity; GO:0003777 microtubule motor activity; GO:0003824 catalytic activity; GO:0005488 binding; GO:0005515 protein binding; GO:0016462 pyrophosphatase activity; GO:0016787 hydrolase activity; GO:0016817 hydrolase activity, acting on acid anhydrides; GO:0016818 hydrolase activity, acting on acid anhydrides, in phosphorus-containing anhydrides; GO:0017111 nucleoside-triphosphat…	K11143	DNAI2; dynein intermediate chain 2, axonemal	chx05016 Huntington disease - Capra hircus (goat);
A0A452FIW6	C-X-C motif chemokine(predicted) OS=Capra hircus OX=9925 GN=CXCL9 PE=4 SV=1	0.35	Down	0.034923	CXCL9	14.142	8	1	2	1	1.628	0.649	1.661	3.014	0.787	0.546	0.695	0.479	0.568	0.42	extracellular	GO:0001906 cell killing; GO:0002237 response to molecule of bacterial origin; GO:0002252 immune effector process; GO:0002376 immune system process; GO:0002682 regulation of immune system process; GO:0002684 positive regulation of immune system process; GO:0002685 regulation of leukocyte migration; GO:0002687 positive regulation of leukocyte migration; GO:0002688 regulation of leukocyte chemotaxis…	GO:0005576 extracellular region; GO:0005615 extracellular space; GO:0005623 cell; GO:0005886 plasma membrane; GO:0009897 external side of plasma membrane; GO:0009986 cell surface; GO:0016020 membrane; GO:0044421 extracellular region part; GO:0044425 membrane part; GO:0044459 plasma membrane part; GO:0044464 cell part; GO:0071944 cell periphery; GO:0098552 side of membrane;	GO:0001664 G-protein coupled receptor binding; GO:0005102 receptor binding; GO:0005125 cytokine activity; GO:0005126 cytokine receptor binding; GO:0005488 binding; GO:0005515 protein binding; GO:0008009 chemokine activity; GO:0030545 receptor regulator activity; GO:0042379 chemokine receptor binding; GO:0045236 CXCR chemokine receptor binding; GO:0048018 receptor agonist activity; GO:0048248 CXCR…	K05416	CXCL9; C-X-C motif chemokine 9	chx04060 Cytokine-cytokine receptor interaction - Capra hircus (goat); chx04061 Viral protein interaction with cytokine and cytokine receptor - Capra hircus (goat); chx04062 Chemokine signaling pathway - Capra hircus (goat); chx04620 Toll-like receptor signaling pathway - Capra hircus (goat);	PF00048	Small cytokines (intecrine/chemokine), interleukin-8 like
A0A452ETM6	Cilia and flagella associated protein 57(predicted) OS=Capra hircus OX=9925 GN=CFAP57 PE=4 SV=1	0.461	Down	0.00155793	CFAP57	144.81	5.2	6	8	6	1.537	1.458	0.783	1.244	1.896	0.675	0.718	0.661	0.607	0.53	cytoplasm
A0A452FKP1	EF-hand calcium-binding domain-containing protein 6(predicted) OS=Capra hircus OX=9925 GN=EFCAB6 PE=4 SV=1	0.464	Down	0.00147723	EFCAB6	164.2	1.4	2	2	2	1.721	1.073	1.128	2.053	1.144	0.872	0.552	0.564	0.723	0.595	mitochondria		GO:0005622 intracellular; GO:0005623 cell; GO:0005634 nucleus; GO:0005654 nucleoplasm; GO:0031974 membrane-enclosed lumen; GO:0031981 nuclear lumen; GO:0043226 organelle; GO:0043227 membrane-bounded organelle; GO:0043229 intracellular organelle; GO:0043231 intracellular membrane-bounded organelle; GO:0043233 organelle lumen; GO:0044422 organelle part; GO:0044424 intracellular part; GO:0044428 nuc…	GO:0005488 binding; GO:0005509 calcium ion binding; GO:0043167 ion binding; GO:0043169 cation binding; GO:0046872 metal ion binding;				PF08976; PF13833; PF13499	Domain of unknown function (DUF1880); EF-hand domain pair; EF-hand domain pair
A0A452DTM0	general transcription factor 3C polypeptide 4(predicted) OS=Capra hircus OX=9925 GN=GTF3C4 PE=4 SV=1	0.16	Down	0.000100279	GTF3C4	91.339	0.9	1	1	1	2.081	2.118	0.79	1.714	2.241	0.255	0.21	0.173	0.443	0.346	cytoplasm	GO:0006139 nucleobase-containing compound metabolic process; GO:0006325 chromatin organization; GO:0006351 transcription, DNA-templated; GO:0006352 DNA-templated transcription, initiation; GO:0006383 transcription from RNA polymerase III promoter; GO:0006384 transcription initiation from RNA polymerase III promoter; GO:0006399 tRNA metabolic process; GO:0006464 cellular protein modification proce…	GO:0000127 transcription factor TFIIIC complex; GO:0005622 intracellular; GO:0005623 cell; GO:0005634 nucleus; GO:0005654 nucleoplasm; GO:0005667 transcription factor complex; GO:0005737 cytoplasm; GO:0005739 mitochondrion; GO:0031974 membrane-enclosed lumen; GO:0031981 nuclear lumen; GO:0032991 macromolecular complex; GO:0043226 organelle; GO:0043227 membrane-bounded organelle; GO:0043229 intrac…	GO:0003824 catalytic activity; GO:0004402 histone acetyltransferase activity; GO:0008047 enzyme activator activity; GO:0008080 N-acetyltransferase activity; GO:0016407 acetyltransferase activity; GO:0016410 N-acyltransferase activity; GO:0016740 transferase activity; GO:0016746 transferase activity, transferring acyl groups; GO:0016747 transferase activity, transferring acyl groups other than ami…	K11310	GTF3C4, KAT12; general transcription factor 3C polypeptide 4 [EC:2.3.1.48]		PF12657; PF12660	Transcription factor IIIC subunit delta N-term; Putative zinc-finger of transcription factor IIIC complex
A0A452G7G8	JCHAIN(predicted) OS=Capra hircus OX=9925 GN=JCHAIN PE=4 SV=1	0.474	Down	0.012896	JCHAIN	18.033	36.1	7	14	7	0.734	1.893	1.244	0.968	2.107	0.483	0.669	0.671	0.699	0.772	extracellular	GO:0002250 adaptive immune response; GO:0002376 immune system process; GO:0003008 system process; GO:0003014 renal system process; GO:0003094 glomerular filtration; GO:0006810 transport; GO:0006897 endocytosis; GO:0006898 receptor-mediated endocytosis; GO:0006928 movement of cell or subcellular component; GO:0006950 response to stress; GO:0006952 defense response; GO:0006955 immune response; GO:0…	GO:0005576 extracellular region; GO:0005615 extracellular space; GO:0019814 immunoglobulin complex; GO:0032991 macromolecular complex; GO:0042571 immunoglobulin complex, circulating; GO:0044421 extracellular region part; GO:0071745 IgA immunoglobulin complex; GO:0071746 IgA immunoglobulin complex, circulating; GO:0071748 monomeric IgA immunoglobulin complex; GO:0071749 polymeric IgA immunoglobuli…	GO:0003823 antigen binding; GO:0005488 binding; GO:0005515 protein binding; GO:0019862 IgA binding; GO:0019865 immunoglobulin binding; GO:0030674 protein binding, bridging; GO:0042802 identical protein binding; GO:0042803 protein homodimerization activity; GO:0044877 macromolecular complex binding; GO:0046983 protein dimerization activity; GO:0060090 binding, bridging;
A0A452DWN7	NEDD8 (Fragment)(predicted) OS=Capra hircus OX=9925 GN=NEDD8 PE=4 SV=1	1.586	Up	0.0105837	NEDD8	8.6338	50.6	4	8	4	0.8	0.773	0.511	0.856	0.738	1.477	1.348	0.888	0.908	1.213	cytoplasm	GO:0006355 regulation of transcription, DNA-templated; GO:0006357 regulation of transcription from RNA polymerase II promoter; GO:0006464 cellular protein modification process; GO:0006508 proteolysis; GO:0006511 ubiquitin-dependent protein catabolic process; GO:0006807 nitrogen compound metabolic process; GO:0006873 cellular ion homeostasis; GO:0006875 cellular metal ion homeostasis; GO:0006879 c…	GO:0005622 intracellular; GO:0005623 cell; GO:0005634 nucleus; GO:0005654 nucleoplasm; GO:0005737 cytoplasm; GO:0005829 cytosol; GO:0031974 membrane-enclosed lumen; GO:0031981 nuclear lumen; GO:0043226 organelle; GO:0043227 membrane-bounded organelle; GO:0043229 intracellular organelle; GO:0043231 intracellular membrane-bounded organelle; GO:0043233 organelle lumen; GO:0044422 organelle part; GO:…	GO:0005488 binding; GO:0005515 protein binding; GO:0019899 enzyme binding; GO:0031625 ubiquitin protein ligase binding; GO:0044389 ubiquitin-like protein ligase binding;	K12158	NEDD8; ubiquitin-like protein Nedd8		PF00240	Ubiquitin family
A0A452E1K8	DPY30 domain-containing protein 1 isoform X3(predicted) OS=Capra hircus OX=9925 GN=DYDC1 PE=4 SV=1	0.426	Down	0.00145671	DYDC1	20.779	8.5	2	2	2	1.532	1.523	1.004	1.36	1.881	0.595	0.641	0.576	0.683	0.612	cytoplasm	GO:0006325 chromatin organization; GO:0006342 chromatin silencing; GO:0006348 chromatin silencing at telomere; GO:0006355 regulation of transcription, DNA-templated; GO:0006996 organelle organization; GO:0009889 regulation of biosynthetic process; GO:0009890 negative regulation of biosynthetic process; GO:0009892 negative regulation of metabolic process; GO:0009987 cellular process; GO:0010468 re…	GO:0005622 intracellular; GO:0005623 cell; GO:0005634 nucleus; GO:0005654 nucleoplasm; GO:0031974 membrane-enclosed lumen; GO:0031981 nuclear lumen; GO:0032991 macromolecular complex; GO:0034708 methyltransferase complex; GO:0035097 histone methyltransferase complex; GO:0043226 organelle; GO:0043227 membrane-bounded organelle; GO:0043229 intracellular organelle; GO:0043231 intracellular membrane-…
A0A452E1V4	Histone H2B(predicted) OS=Capra hircus OX=9925 GN=LOC102181083 PE=4 SV=1	0.579	Down	0.0110416	LOC102181083	13.906	27	4	6	2	0.933	1.51	1.788	1.153	1.248	0.686	0.739	0.769	0.828	0.819	nucleus	GO:0002227 innate immune response in mucosa; GO:0002251 organ or tissue specific immune response; GO:0002376 immune system process; GO:0002385 mucosal immune response; GO:0006323 DNA packaging; GO:0006325 chromatin organization; GO:0006333 chromatin assembly or disassembly; GO:0006334 nucleosome assembly; GO:0006464 cellular protein modification process; GO:0006807 nitrogen compound metabolic pro…	GO:0000785 chromatin; GO:0000786 nucleosome; GO:0005576 extracellular region; GO:0005615 extracellular space; GO:0005622 intracellular; GO:0005623 cell; GO:0005634 nucleus; GO:0005654 nucleoplasm; GO:0005694 chromosome; GO:0005737 cytoplasm; GO:0005829 cytosol; GO:0031974 membrane-enclosed lumen; GO:0031981 nuclear lumen; GO:0032991 macromolecular complex; GO:0032993 protein-DNA complex; GO:00432…	GO:0003676 nucleic acid binding; GO:0003677 DNA binding; GO:0005488 binding; GO:0005515 protein binding; GO:0042802 identical protein binding; GO:0097159 organic cyclic compound binding; GO:1901363 heterocyclic compound binding;	K11252	H2B; histone H2B	chx05034 Alcoholism - Capra hircus (goat); chx05203 Viral carcinogenesis - Capra hircus (goat); chx05322 Systemic lupus erythematosus - Capra hircus (goat);	PF00125	Core histone H2A/H2B/H3/H4
A0A452GA22	peptide-N(4)-(N-acetyl-beta- glucosaminyl)asparagine amidase isoform X1(predicted) OS=Capra hircus OX=9925 GN=NGLY1 PE=4 SV=1	1.527	Up	0.00030052	NGLY1	74.076	13.2	8	9	8	0.889	0.914	0.692	0.832	0.862	1.367	1.364	1.081	1.192	1.393	cytoplasm	GO:0006457 protein folding; GO:0006464 cellular protein modification process; GO:0006508 proteolysis; GO:0006515 misfolded or incompletely synthesized protein catabolic process; GO:0006516 glycoprotein catabolic process; GO:0006517 protein deglycosylation; GO:0006807 nitrogen compound metabolic process; GO:0008152 metabolic process; GO:0009056 catabolic process; GO:0009057 macromolecule catabolic…	GO:0005622 intracellular; GO:0005623 cell; GO:0005634 nucleus; GO:0005737 cytoplasm; GO:0005829 cytosol; GO:0043226 organelle; GO:0043227 membrane-bounded organelle; GO:0043229 intracellular organelle; GO:0043231 intracellular membrane-bounded organelle; GO:0044424 intracellular part; GO:0044444 cytoplasmic part; GO:0044464 cell part;	GO:0000224 peptide-N4-(N-acetyl-beta-glucosaminyl)asparagine amidase activity; GO:0003824 catalytic activity; GO:0016787 hydrolase activity; GO:0016810 hydrolase activity, acting on carbon-nitrogen (but not peptide) bonds; GO:0016811 hydrolase activity, acting on carbon-nitrogen (but not peptide) bonds, in linear amides;	K01456	E3.5.1.52, NGLY1, PNG1; peptide-N4-(N-acetyl-beta-glucosaminyl)asparagine amidase [EC:3.5.1.52]	chx04141 Protein processing in endoplasmic reticulum - Capra hircus (goat);	PF09409; PF04721	PUB domain; Domain of unknown function (DUF750)
A0A452ESE0	Signal-regulatory protein delta(predicted) OS=Capra hircus OX=9925 GN=LOC102171800 PE=4 SV=1	0.46	Down	0.000117048	LOC102171800	31.435	15	5	7	5	1.723	1.362	1.053	1.425	1.532	0.782	0.601	0.505	0.707	0.671	extracellular				K16827	SIRPD; signal-regulatory protein delta		PF07686	Immunoglobulin V-set domain
A0A452EEM4	Peptidoglycan-recognition protein(predicted) OS=Capra hircus OX=9925 GN=PGLYRP1 PE=4 SV=1	0.637	Down	0.036245	PGLYRP1	21.05	34.2	4	7	4	1.188	0.982	1.081	1.606	0.974	0.587	0.395	0.824	0.877	1.029	extracellular	GO:0001817 regulation of cytokine production; GO:0001818 negative regulation of cytokine production; GO:0001906 cell killing; GO:0002218 activation of innate immune response; GO:0002221 pattern recognition receptor signaling pathway; GO:0002253 activation of immune response; GO:0002376 immune system process; GO:0002682 regulation of immune system process; GO:0002683 negative regulation of immune …		GO:0005488 binding; GO:0005539 glycosaminoglycan binding; GO:0008329 signaling pattern recognition receptor activity; GO:0016019 peptidoglycan receptor activity; GO:0038023 signaling receptor activity; GO:0038187 pattern recognition receptor activity; GO:0042834 peptidoglycan binding; GO:0060089 molecular transducer activity; GO:0097367 carbohydrate derivative binding;	K01446	PGRP; peptidoglycan recognition protein		PF01510	N-acetylmuramoyl-L-alanine amidase
A0A452DLX8	Protein FAM75D1(predicted) OS=Capra hircus OX=9925 PE=4 SV=1	0.428	Down	0.00046212	---	166.92	2.3	3	4	3	1.276	1.193	1.446	1.123	1.892	0.456	0.478	0.498	0.685	0.847	cytoplasm
A0A452EDG3	E3 SUMO-protein ligase RanBP2(predicted) OS=Capra hircus OX=9925 GN=RANBP2 PE=4 SV=1	1.811	Up	0.0081003	RANBP2	334.84	0.3	1	1	1	0.889	0.776	0.537	0.826	0.665	1.986	1.359	0.849	1.171	1.324	nucleus	GO:0000082 G1/S transition of mitotic cell cycle; GO:0000226 microtubule cytoskeleton organization; GO:0000278 mitotic cell cycle; GO:0006109 regulation of carbohydrate metabolic process; GO:0006111 regulation of gluconeogenesis; GO:0006403 RNA localization; GO:0006405 RNA export from nucleus; GO:0006406 mRNA export from nucleus; GO:0006464 cellular protein modification process; GO:0006508 proteo…	GO:0005622 intracellular; GO:0005623 cell; GO:0005634 nucleus; GO:0005635 nuclear envelope; GO:0005642 annulate lamellae; GO:0005643 nuclear pore; GO:0005737 cytoplasm; GO:0005739 mitochondrion; GO:0005813 centrosome; GO:0005815 microtubule organizing center; GO:0005829 cytosol; GO:0005856 cytoskeleton; GO:0012505 endomembrane system; GO:0015630 microtubule cytoskeleton; GO:0016020 membrane; GO:0…	GO:0003824 catalytic activity; GO:0005488 binding; GO:0005515 protein binding; GO:0008536 Ran GTPase binding; GO:0016740 transferase activity; GO:0017016 Ras GTPase binding; GO:0019787 ubiquitin-like protein transferase activity; GO:0019789 SUMO transferase activity; GO:0019899 enzyme binding; GO:0031267 small GTPase binding; GO:0051020 GTPase binding;	K12172	RANBP2, NUP358; E3 SUMO-protein ligase RanBP2	chx03013 RNA transport - Capra hircus (goat);	PF00641; PF12185; PF00160	Zn-finger in Ran binding protein and others; Nup358/RanBP2 E3 ligase domain; Cyclophilin type peptidyl-prolyl cis-trans isomerase/CLD
A0A452DL42	Thioredoxin reductase 2, mitochondrial(predicted) OS=Capra hircus OX=9925 GN=TXNRD2 PE=4 SV=1	0.573	Down	0.000100559	TXNRD2	52.868	30.7	11	13	10	1.556	1.189	1.404	1.459	1.084	0.773	0.696	0.706	0.85	0.809	mitochondria	GO:0000302 response to reactive oxygen species; GO:0000305 response to oxygen radical; GO:0002376 immune system process; GO:0002520 immune system development; GO:0006950 response to stress; GO:0006979 response to oxidative stress; GO:0007275 multicellular organism development; GO:0007507 heart development; GO:0008152 metabolic process; GO:0009628 response to abiotic stimulus; GO:0009636 response …	GO:0005622 intracellular; GO:0005623 cell; GO:0005737 cytoplasm; GO:0005739 mitochondrion; GO:0005759 mitochondrial matrix; GO:0005829 cytosol; GO:0030424 axon; GO:0030425 dendrite; GO:0031974 membrane-enclosed lumen; GO:0036477 somatodendritic compartment; GO:0042995 cell projection; GO:0043005 neuron projection; GO:0043025 neuronal cell body; GO:0043226 organelle; GO:0043227 membrane-bounded or…	GO:0003824 catalytic activity; GO:0004791 thioredoxin-disulfide reductase activity; GO:0005488 binding; GO:0005515 protein binding; GO:0015036 disulfide oxidoreductase activity; GO:0016209 antioxidant activity; GO:0016491 oxidoreductase activity; GO:0016651 oxidoreductase activity, acting on NAD(P)H; GO:0016667 oxidoreductase activity, acting on a sulfur group of donors; GO:0016668 oxidoreductase…				PF07992; PF02852	Pyridine nucleotide-disulphide oxidoreductase; Pyridine nucleotide-disulphide oxidoreductase, dimerisation domain
A0A452EQ26	Polycystin family receptor for egg jelly OS=Capra hircus OX=9925 GN=PKDREJ PE=4 SV=1	0.503	Down	2.2123e-05	PKDREJ	235.83	3.4	6	6	6	1.328	1.163	1.681	1.407	1.355	0.582	0.652	0.728	0.761	0.763	plasma membrane	GO:0000003 reproduction; GO:0006810 transport; GO:0006811 ion transport; GO:0006812 cation transport; GO:0006816 calcium ion transport; GO:0007338 single fertilization; GO:0007340 acrosome reaction; GO:0009566 fertilization; GO:0009581 detection of external stimulus; GO:0009582 detection of abiotic stimulus; GO:0009605 response to external stimulus; GO:0009612 response to mechanical stimulus; GO:…	GO:0005623 cell; GO:0005886 plasma membrane; GO:0016020 membrane; GO:0044464 cell part; GO:0071944 cell periphery;	GO:0005215 transporter activity; GO:0005216 ion channel activity; GO:0005261 cation channel activity; GO:0005262 calcium channel activity; GO:0008324 cation transmembrane transporter activity; GO:0015075 ion transmembrane transporter activity; GO:0015085 calcium ion transmembrane transporter activity; GO:0015267 channel activity; GO:0015318 inorganic solute uptake transmembrane transporter activi…	K19921	PKDREJ; polycystic kidney disease and receptor for egg jelly-related protein		PF01477	PLAT/LH2 domain
A0A452F6E3	Solute carrier family 2, facilitated glucose transporter member 5(predicted) OS=Capra hircus OX=9925 GN=LOC106501911 PE=4 SV=1	0.547	Down	0.000136228	LOC106501911	52.805	8	4	10	2	1.284	1.243	1.722	1.09	1.433	0.688	0.701	0.831	0.686	0.8	plasma membrane	GO:0001775 cell activation; GO:0002252 immune effector process; GO:0002263 cell activation involved in immune response; GO:0002274 myeloid leukocyte activation; GO:0002275 myeloid cell activation involved in immune response; GO:0002283 neutrophil activation involved in immune response; GO:0002366 leukocyte activation involved in immune response; GO:0002376 immune system process; GO:0002443 leukoc…	GO:0005622 intracellular; GO:0005623 cell; GO:0005737 cytoplasm; GO:0005886 plasma membrane; GO:0005887 integral component of plasma membrane; GO:0012505 endomembrane system; GO:0012506 vesicle membrane; GO:0016020 membrane; GO:0016021 integral component of membrane; GO:0016324 apical plasma membrane; GO:0030141 secretory granule; GO:0030659 cytoplasmic vesicle membrane; GO:0030667 secretory gran…	GO:0005215 transporter activity; GO:0005353 fructose transmembrane transporter activity; GO:0005355 glucose transmembrane transporter activity; GO:0005488 binding; GO:0015144 carbohydrate transmembrane transporter activity; GO:0015145 monosaccharide transmembrane transporter activity; GO:0015149 hexose transmembrane transporter activity; GO:0022857 transmembrane transporter activity; GO:0030246 c…	K08143	SLC2A5, GLUT5; MFS transporter, SP family, solute carrier family 2 (facilitated glucose/fructose transporter), member 5	chx04973 Carbohydrate digestion and absorption - Capra hircus (goat);
A0A452EEZ8	RCN1 protein(predicted) OS=Capra hircus OX=9925 GN=RCN1 PE=4 SV=1	1.732	Up	0.0076029	RCN1	38.79	37.2	15	28	15	0.763	0.808	0.536	0.878	0.804	1.603	1.609	0.995	1.454	0.901	extracellular	GO:0001654 eye development; GO:0001701 in utero embryonic development; GO:0006464 cellular protein modification process; GO:0006807 nitrogen compound metabolic process; GO:0007275 multicellular organism development; GO:0007423 sensory organ development; GO:0008152 metabolic process; GO:0009790 embryo development; GO:0009792 embryo development ending in birth or egg hatching; GO:0009987 cellular p…	GO:0005622 intracellular; GO:0005623 cell; GO:0005737 cytoplasm; GO:0005783 endoplasmic reticulum; GO:0005788 endoplasmic reticulum lumen; GO:0012505 endomembrane system; GO:0031974 membrane-enclosed lumen; GO:0043226 organelle; GO:0043227 membrane-bounded organelle; GO:0043229 intracellular organelle; GO:0043231 intracellular membrane-bounded organelle; GO:0043233 organelle lumen; GO:0044422 org…	GO:0005488 binding; GO:0005509 calcium ion binding; GO:0043167 ion binding; GO:0043169 cation binding; GO:0046872 metal ion binding;				PF13499; PF13202	EF-hand domain pair; EF hand
P10626	Acrosin (Fragment) OS=Capra hircus OX=9925 GN=ACR PE=1 SV=1	0.641	Down	0.0109628	ACR	6.4332	21.7	1	1	1	1.432	0.858	1.622	1.303	1.183	0.911	0.745	0.983	0.823	0.64	extracellular	GO:0000003 reproduction; GO:0002077 acrosome matrix dispersal; GO:0006508 proteolysis; GO:0006807 nitrogen compound metabolic process; GO:0007190 activation of adenylate cyclase activity; GO:0007338 single fertilization; GO:0007339 binding of sperm to zona pellucida; GO:0007340 acrosome reaction; GO:0007341 penetration of zona pellucida; GO:0008037 cell recognition; GO:0008152 metabolic process; …	GO:0001669 acrosomal vesicle; GO:0005576 extracellular region; GO:0005622 intracellular; GO:0005623 cell; GO:0005737 cytoplasm; GO:0005773 vacuole; GO:0005798 Golgi-associated vesicle; GO:0012505 endomembrane system; GO:0030141 secretory granule; GO:0031410 cytoplasmic vesicle; GO:0031982 vesicle; GO:0032991 macromolecular complex; GO:0043159 acrosomal matrix; GO:0043226 organelle; GO:0043227 mem…	GO:0002020 protease binding; GO:0003676 nucleic acid binding; GO:0003677 DNA binding; GO:0003824 catalytic activity; GO:0004040 amidase activity; GO:0004175 endopeptidase activity; GO:0004252 serine-type endopeptidase activity; GO:0005488 binding; GO:0005507 copper ion binding; GO:0005515 protein binding; GO:0005537 mannose binding; GO:0008144 drug binding; GO:0008233 peptidase activity; GO:00082…	K01317	ACR; acrosin [EC:3.4.21.10]		PF00089	Trypsin
Q3LRQ1	Vitronectin (Fragment) OS=Capra hircus OX=9925 PE=2 SV=1	0.568	Down	0.003384	---	50.365	20.7	8	11	1	1.182	1.406	1.721	0.994	1.417	0.722	0.761	1.087	0.654	0.59	nucleus	GO:0001704 formation of primary germ layer; GO:0001706 endoderm formation; GO:0001889 liver development; GO:0001932 regulation of protein phosphorylation; GO:0001934 positive regulation of protein phosphorylation; GO:0002376 immune system process; GO:0002673 regulation of acute inflammatory response; GO:0002682 regulation of immune system process; GO:0002697 regulation of immune effector process;…	GO:0005576 extracellular region; GO:0005604 basement membrane; GO:0005615 extracellular space; GO:0005622 intracellular; GO:0005623 cell; GO:0005737 cytoplasm; GO:0005783 endoplasmic reticulum; GO:0005788 endoplasmic reticulum lumen; GO:0005791 rough endoplasmic reticulum; GO:0005794 Golgi apparatus; GO:0005796 Golgi lumen; GO:0005886 plasma membrane; GO:0012505 endomembrane system; GO:0016020 me…	GO:0005102 receptor binding; GO:0005178 integrin binding; GO:0005488 binding; GO:0005515 protein binding; GO:0005518 collagen binding; GO:0005539 glycosaminoglycan binding; GO:0008201 heparin binding; GO:0042802 identical protein binding; GO:0043167 ion binding; GO:0043168 anion binding; GO:0044877 macromolecular complex binding; GO:0050839 cell adhesion molecule binding; GO:0050840 extracellular…	K06251	VTN; vitronectin	chx04151 PI3K-Akt signaling pathway - Capra hircus (goat); chx04510 Focal adhesion - Capra hircus (goat); chx04512 ECM-receptor interaction - Capra hircus (goat); chx04610 Complement and coagulation cascades - Capra hircus (goat); chx05165 Human papillomavirus infection - Capra hircus (goat); chx05205 Proteoglycans in cancer - Capra hircus (goat);
A0A452F6I1	nardilysin isoform X1(predicted) OS=Capra hircus OX=9925 GN=NRDC PE=4 SV=1	0.615	Down	0.029477	NRDC	130.71	5.8	5	5	5	1.656	0.909	1.146	1.839	0.842	0.895	0.635	0.735	0.83	0.837	mitochondria	GO:0006508 proteolysis; GO:0006807 nitrogen compound metabolic process; GO:0006928 movement of cell or subcellular component; GO:0007528 neuromuscular junction development; GO:0008152 metabolic process; GO:0008283 cell proliferation; GO:0009893 positive regulation of metabolic process; GO:0009894 regulation of catabolic process; GO:0009896 positive regulation of catabolic process; GO:0009987 cell…	GO:0005622 intracellular; GO:0005623 cell; GO:0005737 cytoplasm; GO:0005739 mitochondrion; GO:0005829 cytosol; GO:0009986 cell surface; GO:0043226 organelle; GO:0043227 membrane-bounded organelle; GO:0043229 intracellular organelle; GO:0043231 intracellular membrane-bounded organelle; GO:0044424 intracellular part; GO:0044444 cytoplasmic part; GO:0044464 cell part;	GO:0003824 catalytic activity; GO:0004175 endopeptidase activity; GO:0004222 metalloendopeptidase activity; GO:0005488 binding; GO:0005515 protein binding; GO:0008233 peptidase activity; GO:0008237 metallopeptidase activity; GO:0016787 hydrolase activity; GO:0019838 growth factor binding; GO:0042562 hormone binding; GO:0048408 epidermal growth factor binding; GO:0070011 peptidase activity, acting…	K01411	NRD1; nardilysin [EC:3.4.24.61]		PF05193	Peptidase M16 inactive domain
A0A452E8A8	Immunoglobulin lambda variable 3-10(predicted) OS=Capra hircus OX=9925 PE=4 SV=1	0.422	Down	0.00085603	---	14.709	7.2	1	2	1	1.333	1.1	2.48	1.19	1.268	0.546	0.569	0.559	0.669	0.766	extracellular							PF07686	Immunoglobulin V-set domain
A0A452EFA2	CGREF1(predicted) OS=Capra hircus OX=9925 GN=CGREF1 PE=4 SV=1	0.528	Down	0.0043204	CGREF1	28.057	15.4	2	2	2	1.378	1.239	1.365	1.393	1.48	0.49	0.671	0.967	0.752	0.738	mitochondria	GO:0001558 regulation of cell growth; GO:0008285 negative regulation of cell proliferation; GO:0030308 negative regulation of cell growth; GO:0040008 regulation of growth; GO:0042127 regulation of cell proliferation; GO:0045926 negative regulation of growth; GO:0048519 negative regulation of biological process; GO:0048523 negative regulation of cellular process; GO:0050789 regulation of biologica…						PF13499	EF-hand domain pair
A0A452F8J5	Dynein light chain(predicted) OS=Capra hircus OX=9925 GN=DYNLL1 PE=4 SV=1	0.617	Down	0.0037235	DYNLL1	10.366	56.2	6	11	3	1.369	1.17	0.913	1.27	1.561	0.911	0.669	0.632	0.922	0.744	cytoplasm	GO:0000003 reproduction; GO:0000086 G2/M transition of mitotic cell cycle; GO:0000278 mitotic cell cycle; GO:0001505 regulation of neurotransmitter levels; GO:0001775 cell activation; GO:0002252 immune effector process; GO:0002263 cell activation involved in immune response; GO:0002274 myeloid leukocyte activation; GO:0002275 myeloid cell activation involved in immune response; GO:0002283 neutrop…	GO:0000775 chromosome, centromeric region; GO:0000776 kinetochore; GO:0005622 intracellular; GO:0005623 cell; GO:0005634 nucleus; GO:0005694 chromosome; GO:0005737 cytoplasm; GO:0005739 mitochondrion; GO:0005813 centrosome; GO:0005815 microtubule organizing center; GO:0005819 spindle; GO:0005829 cytosol; GO:0005856 cytoskeleton; GO:0005868 cytoplasmic dynein complex; GO:0005875 microtubule associ…	GO:0004857 enzyme inhibitor activity; GO:0005488 binding; GO:0005515 protein binding; GO:0008022 protein C-terminus binding; GO:0008092 cytoskeletal protein binding; GO:0019899 enzyme binding; GO:0019904 protein domain specific binding; GO:0030234 enzyme regulator activity; GO:0030235 nitric-oxide synthase regulator activity; GO:0042802 identical protein binding; GO:0042803 protein homodimerizati…	K10418	DYNLL; dynein light chain LC8-type	chx04962 Vasopressin-regulated water reabsorption - Capra hircus (goat);	PF01221	Dynein light chain type 1
A0A452FLC9	EF-hand domain-containing protein KIAA0494(predicted) OS=Capra hircus OX=9925 GN=EFCAB14 PE=4 SV=1	1.987	Up	0.00152216	EFCAB14	55.042	10.9	5	7	5	0.625	0.837	0.701	0.637	0.738	2.241	1.311	1.111	1.208	1.159	cytoplasm
A0A452FNG4	Nuclear pore membrane glycoprotein 210-like protein(predicted) OS=Capra hircus OX=9925 GN=NUP210L PE=4 SV=1	0.485	Down	0.02136	NUP210L	207.24	1.7	3	3	3	1.708	0.802	1.743	1.819	0.938	0.602	0.586	0.731	0.706	0.774	plasma membrane	GO:0000003 reproduction; GO:0002064 epithelial cell development; GO:0003006 developmental process involved in reproduction; GO:0007275 multicellular organism development; GO:0007276 gamete generation; GO:0007281 germ cell development; GO:0007283 spermatogenesis; GO:0007286 spermatid development; GO:0007548 sex differentiation; GO:0008406 gonad development; GO:0008584 male gonad development; GO:00…			K14314	NUP210, GP210; nuclear pore complex protein Nup210	chx03013 RNA transport - Capra hircus (goat);	PF02368	Bacterial Ig-like domain (group 2)
A0A452FCW0	Calmin(predicted) OS=Capra hircus OX=9925 GN=CLMN PE=4 SV=1	1.503	Up	2.3495e-05	CLMN	112.59	21.7	19	35	19	0.862	0.789	0.832	0.903	0.736	1.226	1.387	1.164	1.167	1.252	plasma membrane	GO:0007275 multicellular organism development; GO:0007399 nervous system development; GO:0008285 negative regulation of cell proliferation; GO:0009987 cellular process; GO:0016043 cellular component organization; GO:0022008 neurogenesis; GO:0030030 cell projection organization; GO:0030154 cell differentiation; GO:0030182 neuron differentiation; GO:0031175 neuron projection development; GO:0032501…	GO:0005622 intracellular; GO:0005623 cell; GO:0005737 cytoplasm; GO:0016020 membrane; GO:0044424 intracellular part; GO:0044464 cell part;					PF00307	Calponin homology (CH) domain
A0A452DR39	carbonyl reductase [NADPH] 1-like(predicted) OS=Capra hircus OX=9925 GN=LOC108633281 PE=4 SV=1	1.531	Up	1.6653e-05	LOC108633281	30.438	37.2	8	8	6	0.848	0.831	0.74	0.838	0.883	1.43	1.24	1.16	1.241	1.266	mitochondria	GO:0000003 reproduction; GO:0001516 prostaglandin biosynthetic process; GO:0001542 ovulation from ovarian follicle; GO:0001676 long-chain fatty acid metabolic process; GO:0002237 response to molecule of bacterial origin; GO:0003006 developmental process involved in reproduction; GO:0006082 organic acid metabolic process; GO:0006629 lipid metabolic process; GO:0006631 fatty acid metabolic process;…	GO:0005622 intracellular; GO:0005623 cell; GO:0005634 nucleus; GO:0005737 cytoplasm; GO:0005829 cytosol; GO:0005886 plasma membrane; GO:0005902 microvillus; GO:0016020 membrane; GO:0042995 cell projection; GO:0043226 organelle; GO:0043227 membrane-bounded organelle; GO:0043229 intracellular organelle; GO:0043231 intracellular membrane-bounded organelle; GO:0044424 intracellular part; GO:0044444 c…	GO:0003824 catalytic activity; GO:0004090 carbonyl reductase (NADPH) activity; GO:0016491 oxidoreductase activity; GO:0016614 oxidoreductase activity, acting on CH-OH group of donors; GO:0016616 oxidoreductase activity, acting on the CH-OH group of donors, NAD or NADP as acceptor; GO:0016651 oxidoreductase activity, acting on NAD(P)H; GO:0016655 oxidoreductase activity, acting on NAD(P)H, quinone…				PF00106	short chain dehydrogenase
A0A452EBZ8	Trafficking protein particle complex subunit 9 (Fragment)(predicted) OS=Capra hircus OX=9925 GN=TRAPPC9 PE=4 SV=1	0.546	Down	0.00015749	TRAPPC9	111.85	1	1	1	1	1.361	1.245	1.686	1.131	1.348	0.58	0.756	0.823	0.749	0.791	cytoplasm,nucleus	GO:0006355 regulation of transcription, DNA-templated; GO:0006810 transport; GO:0006888 ER to Golgi vesicle-mediated transport; GO:0006900 membrane budding; GO:0006901 vesicle coating; GO:0006903 vesicle targeting; GO:0006996 organelle organization; GO:0007275 multicellular organism development; GO:0007399 nervous system development; GO:0007417 central nervous system development; GO:0007420 brain…	GO:0005622 intracellular; GO:0005623 cell; GO:0005737 cytoplasm; GO:0005794 Golgi apparatus; GO:0005802 trans-Golgi network; GO:0005829 cytosol; GO:0012505 endomembrane system; GO:0030008 TRAPP complex; GO:0031984 organelle subcompartment; GO:0032991 macromolecular complex; GO:0043226 organelle; GO:0043227 membrane-bounded organelle; GO:0043229 intracellular organelle; GO:0043231 intracellular me…	GO:0005085 guanyl-nucleotide exchange factor activity; GO:0005088 Ras guanyl-nucleotide exchange factor activity; GO:0005488 binding; GO:0005515 protein binding; GO:0017016 Ras GTPase binding; GO:0017112 Rab guanyl-nucleotide exchange factor activity; GO:0017137 Rab GTPase binding; GO:0019899 enzyme binding; GO:0031267 small GTPase binding; GO:0051020 GTPase binding; GO:0098772 molecular function…	K20306	TRAPPC9, TRS120; trafficking protein particle complex subunit 9
A0A452DLA1	Plasminogen activator(predicted) OS=Capra hircus OX=9925 GN=PLAT PE=4 SV=1	2.931	Up	0.0044648	PLAT	62.645	3.4	2	3	2	0.7	0.552	0.564	0.46	0.404	1.178	0.668	1.35	2.119	2.54	extracellular	GO:0001101 response to acid chemical; GO:0001666 response to hypoxia; GO:0006464 cellular protein modification process; GO:0006508 proteolysis; GO:0006807 nitrogen compound metabolic process; GO:0006928 movement of cell or subcellular component; GO:0006950 response to stress; GO:0007154 cell communication; GO:0007165 signal transduction; GO:0007166 cell surface receptor signaling pathway; GO:0007…	GO:0005576 extracellular region; GO:0005615 extracellular space; GO:0005622 intracellular; GO:0005623 cell; GO:0005737 cytoplasm; GO:0009986 cell surface; GO:0012505 endomembrane system; GO:0030141 secretory granule; GO:0031410 cytoplasmic vesicle; GO:0031982 vesicle; GO:0043226 organelle; GO:0043227 membrane-bounded organelle; GO:0043229 intracellular organelle; GO:0044421 extracellular region p…	GO:0003824 catalytic activity; GO:0004175 endopeptidase activity; GO:0004252 serine-type endopeptidase activity; GO:0005102 receptor binding; GO:0005488 binding; GO:0005515 protein binding; GO:0008233 peptidase activity; GO:0008236 serine-type peptidase activity; GO:0016787 hydrolase activity; GO:0017171 serine hydrolase activity; GO:0051219 phosphoprotein binding; GO:0070011 peptidase activity, …	K01343	PLAT; tissue plasminogen activator [EC:3.4.21.68]	chx04371 Apelin signaling pathway - Capra hircus (goat); chx04610 Complement and coagulation cascades - Capra hircus (goat); chx05202 Transcriptional misregulation in cancer - Capra hircus (goat); chx05215 Prostate cancer - Capra hircus (goat); chx05418 Fluid shear stress and atherosclerosis - Capra hircus (goat);	PF00039; PF00008; PF00051; PF00089	Fibronectin type I domain; EGF-like domain; Kringle domain; Trypsin
A0A452FFM4	Putative casein kinase ii subunit alpha'-like protein(predicted) OS=Capra hircus OX=9925 GN=CSNK2A2 PE=4 SV=1	0.499	Down	0.00064172	CSNK2A2	41.181	4.6	2	2	2	1.68	1.033	1.354	1.829	1.082	0.593	0.662	0.807	0.723	0.696	nucleus	GO:0006464 cellular protein modification process; GO:0006468 protein phosphorylation; GO:0006793 phosphorus metabolic process; GO:0006796 phosphate-containing compound metabolic process; GO:0006807 nitrogen compound metabolic process; GO:0008152 metabolic process; GO:0009892 negative regulation of metabolic process; GO:0009894 regulation of catabolic process; GO:0009895 negative regulation of cat…	GO:0000785 chromatin; GO:0001669 acrosomal vesicle; GO:0005622 intracellular; GO:0005623 cell; GO:0005634 nucleus; GO:0005654 nucleoplasm; GO:0005694 chromosome; GO:0005737 cytoplasm; GO:0005829 cytosol; GO:0005886 plasma membrane; GO:0005956 protein kinase CK2 complex; GO:0012505 endomembrane system; GO:0016020 membrane; GO:0030141 secretory granule; GO:0031410 cytoplasmic vesicle; GO:0031974 me…	GO:0003824 catalytic activity; GO:0004672 protein kinase activity; GO:0004674 protein serine/threonine kinase activity; GO:0005488 binding; GO:0005515 protein binding; GO:0016301 kinase activity; GO:0016740 transferase activity; GO:0016772 transferase activity, transferring phosphorus-containing groups; GO:0016773 phosphotransferase activity, alcohol group as acceptor; GO:0047485 protein N-termin…	K03097	CSNK2A; casein kinase II subunit alpha [EC:2.7.11.1]	chx03008 Ribosome biogenesis in eukaryotes - Capra hircus (goat); chx04064 NF-kappa B signaling pathway - Capra hircus (goat); chx04137 Mitophagy - animal - Capra hircus (goat); chx04310 Wnt signaling pathway - Capra hircus (goat); chx04520 Adherens junction - Capra hircus (goat); chx05162 Measles - Capra hircus (goat); chx05235 PD-L1 expression and PD-1 checkpoint pathway in cancer - Capra hircu…	PF00069	Protein kinase domain
A0A452FZA5	Coiled-coil domain-containing protein 135(predicted) OS=Capra hircus OX=9925 GN=DRC7 PE=4 SV=1	0.564	Down	0.00049857	DRC7	100.91	1.2	1	1	1	1.344	1.411	1.087	1.252	1.589	0.762	0.548	0.885	0.791	0.785	cytoplasm		GO:0005622 intracellular; GO:0005623 cell; GO:0005737 cytoplasm; GO:0044424 intracellular part; GO:0044464 cell part;
A0A452EQV1	Leucine carboxyl methyltransferase 1(predicted) OS=Capra hircus OX=9925 GN=LCMT1 PE=4 SV=1	1.555	Up	0.0051638	LCMT1	38.009	27.4	8	8	8	0.845	0.837	0.69	0.906	0.836	1.791	1.3	0.967	1.149	1.19	cytoplasm,nucleus	GO:0000086 G2/M transition of mitotic cell cycle; GO:0000278 mitotic cell cycle; GO:0006464 cellular protein modification process; GO:0006479 protein methylation; GO:0006481 C-terminal protein methylation; GO:0006807 nitrogen compound metabolic process; GO:0007049 cell cycle; GO:0007088 regulation of mitotic nuclear division; GO:0007346 regulation of mitotic cell cycle; GO:0008152 metabolic proce…	GO:0005622 intracellular; GO:0005623 cell; GO:0005634 nucleus; GO:0005654 nucleoplasm; GO:0005737 cytoplasm; GO:0005829 cytosol; GO:0031974 membrane-enclosed lumen; GO:0031981 nuclear lumen; GO:0043226 organelle; GO:0043227 membrane-bounded organelle; GO:0043229 intracellular organelle; GO:0043231 intracellular membrane-bounded organelle; GO:0043233 organelle lumen; GO:0044422 organelle part; GO:…	GO:0003824 catalytic activity; GO:0003880 protein C-terminal carboxyl O-methyltransferase activity; GO:0008168 methyltransferase activity; GO:0008171 O-methyltransferase activity; GO:0008276 protein methyltransferase activity; GO:0008757 S-adenosylmethionine-dependent methyltransferase activity; GO:0010340 carboxyl-O-methyltransferase activity; GO:0016740 transferase activity; GO:0016741 transfer…	K18203	LCMT1; [phosphatase 2A protein]-leucine-carboxy methyltransferase [EC:2.1.1.233]
A0A452E876	Acrosin-binding protein(predicted) OS=Capra hircus OX=9925 GN=ACRBP PE=4 SV=1	0.406	Down	0.00093929	ACRBP	58.736	33.1	19	63	19	1.66	1.629	0.798	1.225	1.813	0.501	0.561	0.462	0.632	0.739	extracellular	GO:0000003 reproduction; GO:0003006 developmental process involved in reproduction; GO:0007276 gamete generation; GO:0007281 germ cell development; GO:0007283 spermatogenesis; GO:0007286 spermatid development; GO:0009893 positive regulation of metabolic process; GO:0009987 cellular process; GO:0010604 positive regulation of macromolecule metabolic process; GO:0010952 positive regulation of peptid…	GO:0001669 acrosomal vesicle; GO:0002080 acrosomal membrane; GO:0005576 extracellular region; GO:0005622 intracellular; GO:0005623 cell; GO:0005634 nucleus; GO:0005737 cytoplasm; GO:0012505 endomembrane system; GO:0012506 vesicle membrane; GO:0016020 membrane; GO:0030141 secretory granule; GO:0030659 cytoplasmic vesicle membrane; GO:0030667 secretory granule membrane; GO:0031090 organelle membran…	GO:0008047 enzyme activator activity; GO:0016504 peptidase activator activity; GO:0030234 enzyme regulator activity; GO:0061134 peptidase regulator activity; GO:0098772 molecular function regulator;
A0A452EB87	serine/threonine-protein kinase WNK1 isoform X28(predicted) OS=Capra hircus OX=9925 GN=WNK1 PE=4 SV=1	1.59	Up	0.00038083	WNK1	218.87	4	8	8	8	0.864	0.824	0.749	0.905	0.689	1.471	1.32	1.118	1.086	1.416	nucleus	GO:0009892 negative regulation of metabolic process; GO:0010563 negative regulation of phosphorus metabolic process; GO:0010921 regulation of phosphatase activity; GO:0010923 negative regulation of phosphatase activity; GO:0019220 regulation of phosphate metabolic process; GO:0019222 regulation of metabolic process; GO:0031323 regulation of cellular metabolic process; GO:0031324 negative regulati…		GO:0005488 binding; GO:0005515 protein binding; GO:0019899 enzyme binding; GO:0019902 phosphatase binding;				PF00069; PF12202	Protein kinase domain; Oxidative-stress-responsive kinase 1 C terminal
A0A452EBC8	Thrombospondin type 1 domain containing 4(predicted) OS=Capra hircus OX=9925 GN=THSD4 PE=4 SV=1	0.655	Down	0.0175604	THSD4	73.311	4.4	3	4	3	1.389	1.25	0.99	1.425	1.272	0.515	1.074	1.063	0.78	0.709	extracellular				K23377	chx04350 TGF-beta signaling pathway - Capra hircus (goat);		PF00090; PF08686	Thrombospondin type 1 domain; PLAC (protease and lacunin) domain
A0A452GBD2	Disintegrin and metalloproteinase domain-containing protein 30 (Fragment)(predicted) OS=Capra hircus OX=9925 GN=ADAM30 PE=4 SV=1	0.531	Down	1.72462e-05	ADAM30	85.915	10.5	6	6	6	1.374	1.142	1.327	1.396	1.512	0.731	0.611	0.67	0.761	0.814	plasma membrane	GO:0000003 reproduction; GO:0006508 proteolysis; GO:0006807 nitrogen compound metabolic process; GO:0007338 single fertilization; GO:0007339 binding of sperm to zona pellucida; GO:0008037 cell recognition; GO:0008152 metabolic process; GO:0009566 fertilization; GO:0009987 cellular process; GO:0009988 cell-cell recognition; GO:0019538 protein metabolic process; GO:0019953 sexual reproduction; GO:0…	GO:0005623 cell; GO:0005886 plasma membrane; GO:0016020 membrane; GO:0016021 integral component of membrane; GO:0031224 intrinsic component of membrane; GO:0044425 membrane part; GO:0044464 cell part; GO:0071944 cell periphery;	GO:0003824 catalytic activity; GO:0005488 binding; GO:0008233 peptidase activity; GO:0008237 metallopeptidase activity; GO:0008270 zinc ion binding; GO:0016787 hydrolase activity; GO:0043167 ion binding; GO:0043169 cation binding; GO:0046872 metal ion binding; GO:0046914 transition metal ion binding; GO:0070011 peptidase activity, acting on L-amino acid peptides;	K08615	ADAM30; disintegrin and metalloproteinase domain-containing protein 30 [EC:3.4.24.-]		PF01421; PF00200	Reprolysin (M12B) family zinc metalloprotease ; Disintegrin
A0A452DMQ9	interferon-induced very large GTPase 1-like(predicted) OS=Capra hircus OX=9925 GN=LOC102184922 PE=4 SV=1	0.653	Down	0.0102776	LOC102184922	267.9	0.6	1	1	1	1.125	1.225	1.465	1.173	1.373	0.592	0.756	1.194	0.952	0.658	cytoplasm
A0A452FUS0	Serine/threonine-protein phosphatase(predicted) OS=Capra hircus OX=9925 GN=PPP2CA PE=4 SV=1	1.523	Up	0.00110206	PPP2CA	35.594	39.5	12	21	2	0.847	0.826	0.625	0.934	0.851	1.4	1.384	1.141	1.078	1.215	cytoplasm	GO:0000122 negative regulation of transcription from RNA polymerase II promoter; GO:0000184 nuclear-transcribed mRNA catabolic process, nonsense-mediated decay; GO:0000188 inactivation of MAPK activity; GO:0000956 nuclear-transcribed mRNA catabolic process; GO:0001558 regulation of cell growth; GO:0001678 cellular glucose homeostasis; GO:0001932 regulation of protein phosphorylation; GO:0001933 n…	GO:0000159 protein phosphatase type 2A complex; GO:0000775 chromosome, centromeric region; GO:0005622 intracellular; GO:0005623 cell; GO:0005634 nucleus; GO:0005694 chromosome; GO:0005737 cytoplasm; GO:0005739 mitochondrion; GO:0005829 cytosol; GO:0005856 cytoskeleton; GO:0005886 plasma membrane; GO:0008287 protein serine/threonine phosphatase complex; GO:0014069 postsynaptic density; GO:0015630 …	GO:0001664 G-protein coupled receptor binding; GO:0003823 antigen binding; GO:0003824 catalytic activity; GO:0004721 phosphoprotein phosphatase activity; GO:0004722 protein serine/threonine phosphatase activity; GO:0005102 receptor binding; GO:0005488 binding; GO:0005515 protein binding; GO:0008022 protein C-terminus binding; GO:0008092 cytoskeletal protein binding; GO:0016787 hydrolase activity;…	K04382	PPP2C; serine/threonine-protein phosphatase 2A catalytic subunit [EC:3.1.3.16]	chx03015 mRNA surveillance pathway - Capra hircus (goat); chx04071 Sphingolipid signaling pathway - Capra hircus (goat); chx04114 Oocyte meiosis - Capra hircus (goat); chx04136 Autophagy - other - Capra hircus (goat); chx04140 Autophagy - animal - Capra hircus (goat); chx04151 PI3K-Akt signaling pathway - Capra hircus (goat); chx04152 AMPK signaling pathway - Capra hircus (goat); chx04261 Adrener…	PF00149	Calcineurin-like phosphoesterase
A0A452EHM9	B-cell receptor-associated protein 29 isoform X2(predicted) OS=Capra hircus OX=9925 GN=BCAP29 PE=4 SV=1	0.46	Down	0.00031807	BCAP29	28.092	6.2	1	1	1	1.722	1.046	1.228	1.355	1.809	0.635	0.523	0.827	0.693	0.615	endoplasmic reticulum	GO:0006810 transport; GO:0006888 ER to Golgi vesicle-mediated transport; GO:0008104 protein localization; GO:0016192 vesicle-mediated transport; GO:0033036 macromolecule localization; GO:0033365 protein localization to organelle; GO:0034613 cellular protein localization; GO:0046907 intracellular transport; GO:0048193 Golgi vesicle transport; GO:0051179 localization; GO:0051234 establishment of lo…	GO:0005622 intracellular; GO:0005623 cell; GO:0005737 cytoplasm; GO:0005783 endoplasmic reticulum; GO:0005789 endoplasmic reticulum membrane; GO:0012505 endomembrane system; GO:0016020 membrane; GO:0031984 organelle subcompartment; GO:0042175 nuclear outer membrane-endoplasmic reticulum membrane network; GO:0043226 organelle; GO:0043227 membrane-bounded organelle; GO:0043229 intracellular organel…
A0A452E192	DIS3-like exonuclease 1(predicted) OS=Capra hircus OX=9925 GN=DIS3L PE=4 SV=1	3.671	Up	0.0033638	DIS3L	120.77	0.8	1	5	1	0.297	0.441	0.904	0.292	0.335	0.711	1.188	2.751	1.551	2.128	mitochondria	GO:0006139 nucleobase-containing compound metabolic process; GO:0006364 rRNA processing; GO:0006396 RNA processing; GO:0006401 RNA catabolic process; GO:0006725 cellular aromatic compound metabolic process; GO:0006807 nitrogen compound metabolic process; GO:0008152 metabolic process; GO:0009056 catabolic process; GO:0009057 macromolecule catabolic process; GO:0009987 cellular process; GO:0010467 …	GO:0000177 cytoplasmic exosome (RNase complex); GO:0000178 exosome (RNase complex); GO:0005622 intracellular; GO:0005623 cell; GO:0005737 cytoplasm; GO:0005813 centrosome; GO:0005815 microtubule organizing center; GO:0005829 cytosol; GO:0005856 cytoskeleton; GO:0005886 plasma membrane; GO:0015630 microtubule cytoskeleton; GO:0016020 membrane; GO:0032991 macromolecular complex; GO:0043226 organell…	GO:0000175 3'-5'-exoribonuclease activity; GO:0003824 catalytic activity; GO:0004518 nuclease activity; GO:0004527 exonuclease activity; GO:0004532 exoribonuclease activity; GO:0004540 ribonuclease activity; GO:0005488 binding; GO:0005515 protein binding; GO:0008408 3'-5' exonuclease activity; GO:0016787 hydrolase activity; GO:0016788 hydrolase activity, acting on ester bonds; GO:0016796 exonucle…	K18681	DIS3L; DIS3-like exonuclease 1 [EC:3.1.13.-]	chx03018 RNA degradation - Capra hircus (goat);	PF00773	RNB domain
A0A452G4X4	Membrane metallo-endopeptidase-like 1(predicted) OS=Capra hircus OX=9925 GN=MMEL1 PE=4 SV=1	0.587	Down	3.6207e-06	MMEL1	90.532	30.5	21	32	21	1.49	1.13	1.314	1.32	1.224	0.802	0.766	0.759	0.695	0.782	cytoplasm	GO:0006508 proteolysis; GO:0006807 nitrogen compound metabolic process; GO:0008152 metabolic process; GO:0019538 protein metabolic process; GO:0043170 macromolecule metabolic process; GO:0044238 primary metabolic process; GO:0071704 organic substance metabolic process; GO:1901564 organonitrogen compound metabolic process;	GO:0005576 extracellular region; GO:0005615 extracellular space; GO:0005622 intracellular; GO:0005623 cell; GO:0005737 cytoplasm; GO:0005783 endoplasmic reticulum; GO:0005794 Golgi apparatus; GO:0012505 endomembrane system; GO:0016020 membrane; GO:0043226 organelle; GO:0043227 membrane-bounded organelle; GO:0043229 intracellular organelle; GO:0043231 intracellular membrane-bounded organelle; GO:0…	GO:0003824 catalytic activity; GO:0004175 endopeptidase activity; GO:0004222 metalloendopeptidase activity; GO:0005488 binding; GO:0008233 peptidase activity; GO:0008237 metallopeptidase activity; GO:0008270 zinc ion binding; GO:0016787 hydrolase activity; GO:0043167 ion binding; GO:0043169 cation binding; GO:0046872 metal ion binding; GO:0046914 transition metal ion binding; GO:0070011 peptidase…	K08635	MMEL1; membrane metallo-endopeptidase-like 1
A0A452DZD6	Immunoglobulin light chain, lambda gene cluster(predicted) OS=Capra hircus OX=9925 PE=4 SV=1	0.501	Down	0.0082823	---	11.298	77.4	10	60	9	0.882	1.644	1.62	0.865	1.8	0.47	0.709	0.857	0.701	0.675	extracellular							PF07654	Immunoglobulin C1-set domain
A0A452G8Q9	Tubulin beta 3 class III(predicted) OS=Capra hircus OX=9925 GN=LOC102181148 PE=4 SV=1	0.425	Down	0.00105605	LOC102181148	49.053	26.4	10	30	1	1.816	1.279	1.263	1.801	1.168	0.594	0.623	0.644	0.677	0.579	cytoplasm,nucleus	GO:0000278 mitotic cell cycle; GO:0000902 cell morphogenesis; GO:0000904 cell morphogenesis involved in differentiation; GO:0006928 movement of cell or subcellular component; GO:0006935 chemotaxis; GO:0006996 organelle organization; GO:0007010 cytoskeleton organization; GO:0007049 cell cycle; GO:0007275 multicellular organism development; GO:0007399 nervous system development; GO:0007409 axonogen…	GO:0005622 intracellular; GO:0005623 cell; GO:0005737 cytoplasm; GO:0005856 cytoskeleton; GO:0005874 microtubule; GO:0005886 plasma membrane; GO:0015630 microtubule cytoskeleton; GO:0016020 membrane; GO:0030424 axon; GO:0030425 dendrite; GO:0036477 somatodendritic compartment; GO:0042995 cell projection; GO:0043005 neuron projection; GO:0043025 neuronal cell body; GO:0043226 organelle; GO:0043228…	GO:0005198 structural molecule activity; GO:0005200 structural constituent of cytoskeleton; GO:0005488 binding; GO:0033218 amide binding; GO:0042277 peptide binding;	K07375	TUBB; tubulin beta	chx04145 Phagosome - Capra hircus (goat); chx04540 Gap junction - Capra hircus (goat);	PF00091; PF03953	Tubulin/FtsZ family, GTPase domain; Tubulin C-terminal domain
A0A452EZ41	LIM and calponin homology domains 1(predicted) OS=Capra hircus OX=9925 GN=LIMCH1 PE=4 SV=1	1.732	Up	0.00172209	LIMCH1	118.97	0.7	1	2	1	0.635	0.831	0.664	0.717	0.948	1.523	1.393	0.924	1.236	1.497	nucleus	GO:0001932 regulation of protein phosphorylation; GO:0001934 positive regulation of protein phosphorylation; GO:0001952 regulation of cell-matrix adhesion; GO:0009893 positive regulation of metabolic process; GO:0010562 positive regulation of phosphorus metabolic process; GO:0010604 positive regulation of macromolecule metabolic process; GO:0010638 positive regulation of organelle organization; G…	GO:0001725 stress fiber; GO:0005622 intracellular; GO:0005623 cell; GO:0005856 cytoskeleton; GO:0015629 actin cytoskeleton; GO:0032432 actin filament bundle; GO:0042641 actomyosin; GO:0043226 organelle; GO:0043228 non-membrane-bounded organelle; GO:0043229 intracellular organelle; GO:0043232 intracellular non-membrane-bounded organelle; GO:0044422 organelle part; GO:0044424 intracellular part; GO…	GO:0005488 binding; GO:0005515 protein binding; GO:0008092 cytoskeletal protein binding; GO:0017022 myosin binding; GO:0032028 myosin head/neck binding; GO:0032034 myosin II head/neck binding; GO:0032036 myosin heavy chain binding; GO:0032038 myosin II heavy chain binding; GO:0045159 myosin II binding;				PF00307; PF00412	Calponin homology (CH) domain; LIM domain
D7R6C7	Sperm lysozyme like protein 1 OS=Capra hircus OX=9925 GN=SLLP1 PE=2 SV=1	0.366	Down	0.00158323	SLLP1	18.031	45.4	6	22	6	1.692	1.76	0.899	1.543	1.588	0.581	0.482	0.558	0.595	0.52	extracellular	GO:0000003 reproduction; GO:0000270 peptidoglycan metabolic process; GO:0001775 cell activation; GO:0002274 myeloid leukocyte activation; GO:0002376 immune system process; GO:0002682 regulation of immune system process; GO:0002684 positive regulation of immune system process; GO:0002694 regulation of leukocyte activation; GO:0002696 positive regulation of leukocyte activation; GO:0006022 aminogly…	GO:0001669 acrosomal vesicle; GO:0002080 acrosomal membrane; GO:0005576 extracellular region; GO:0005615 extracellular space; GO:0005622 intracellular; GO:0005623 cell; GO:0005737 cytoplasm; GO:0005773 vacuole; GO:0012505 endomembrane system; GO:0012506 vesicle membrane; GO:0016020 membrane; GO:0030141 secretory granule; GO:0030659 cytoplasmic vesicle membrane; GO:0030667 secretory granule membra…	GO:0003796 lysozyme activity; GO:0003824 catalytic activity; GO:0004553 hydrolase activity, hydrolyzing O-glycosyl compounds; GO:0016787 hydrolase activity; GO:0016798 hydrolase activity, acting on glycosyl bonds; GO:0061783 peptidoglycan muralytic activity;				PF00062	C-type lysozyme/alpha-lactalbumin family
A0A452E356	26S protease regulatory subunit 6A (Fragment)(predicted) OS=Capra hircus OX=9925 GN=PSMC3 PE=4 SV=1	1.594	Up	0.002177	PSMC3	49.543	57.7	22	46	22	0.809	0.815	0.779	0.835	0.749	1.397	1.415	1.004	1.223	1.318	cytoplasm	GO:0001701 in utero embryonic development; GO:0001775 cell activation; GO:0001824 blastocyst development; GO:0002252 immune effector process; GO:0002263 cell activation involved in immune response; GO:0002274 myeloid leukocyte activation; GO:0002275 myeloid cell activation involved in immune response; GO:0002283 neutrophil activation involved in immune response; GO:0002366 leukocyte activation in…	GO:0000502 proteasome complex; GO:0000932 P-body; GO:0005576 extracellular region; GO:0005622 intracellular; GO:0005623 cell; GO:0005634 nucleus; GO:0005654 nucleoplasm; GO:0005737 cytoplasm; GO:0005829 cytosol; GO:0005838 proteasome regulatory particle; GO:0008540 proteasome regulatory particle, base subcomplex; GO:0012505 endomembrane system; GO:0022624 proteasome accessory complex; GO:0030141 …	GO:0003824 catalytic activity; GO:0005488 binding; GO:0005515 protein binding; GO:0008134 transcription factor binding; GO:0016462 pyrophosphatase activity; GO:0016787 hydrolase activity; GO:0016817 hydrolase activity, acting on acid anhydrides; GO:0016818 hydrolase activity, acting on acid anhydrides, in phosphorus-containing anhydrides; GO:0016887 ATPase activity; GO:0017025 TBP-class protein b…	K03065	PSMC3, RPT5; 26S proteasome regulatory subunit T5	chx03050 Proteasome - Capra hircus (goat); chx05169 Epstein-Barr virus infection - Capra hircus (goat);	PF00004	ATPase family associated with various cellular activities (AAA)
A0A452G5R6	Haptoglobin(predicted) OS=Capra hircus OX=9925 GN=LOC102176354 PE=4 SV=1	0.495	Down	0.000143612	LOC102176354	44.552	33.5	13	16	13	1.317	1.121	1.738	1.654	1.208	0.793	0.592	0.71	0.626	0.764	extracellular	GO:0000003 reproduction; GO:0000302 response to reactive oxygen species; GO:0001101 response to acid chemical; GO:0001666 response to hypoxia; GO:0001775 cell activation; GO:0001889 liver development; GO:0002237 response to molecule of bacterial origin; GO:0002252 immune effector process; GO:0002263 cell activation involved in immune response; GO:0002274 myeloid leukocyte activation; GO:0002275 m…	GO:0005576 extracellular region; GO:0005615 extracellular space; GO:0005622 intracellular; GO:0005623 cell; GO:0005737 cytoplasm; GO:0005783 endoplasmic reticulum; GO:0005794 Golgi apparatus; GO:0012505 endomembrane system; GO:0030139 endocytic vesicle; GO:0030141 secretory granule; GO:0031410 cytoplasmic vesicle; GO:0031838 haptoglobin-hemoglobin complex; GO:0031974 membrane-enclosed lumen; GO:0…	GO:0005488 binding; GO:0005515 protein binding; GO:0030492 hemoglobin binding; GO:0042802 identical protein binding; GO:0042803 protein homodimerization activity; GO:0046983 protein dimerization activity;	K16142	HP; haptoglobin		PF00089	Trypsin
A0A452E1I4	Disintegrin and metalloproteinase domain-containing protein 2(predicted) OS=Capra hircus OX=9925 GN=ADAM2 PE=4 SV=1	0.571	Down	4.3241e-06	ADAM2	80.143	11	7	17	7	1.44	1.187	1.289	1.36	1.37	0.806	0.772	0.654	0.717	0.849	extracellular	GO:0000003 reproduction; GO:0003006 developmental process involved in reproduction; GO:0003008 system process; GO:0006508 proteolysis; GO:0006807 nitrogen compound metabolic process; GO:0007155 cell adhesion; GO:0007275 multicellular organism development; GO:0007276 gamete generation; GO:0007283 spermatogenesis; GO:0007338 single fertilization; GO:0007339 binding of sperm to zona pellucida; GO:00…	GO:0001669 acrosomal vesicle; GO:0005622 intracellular; GO:0005623 cell; GO:0005737 cytoplasm; GO:0005886 plasma membrane; GO:0005887 integral component of plasma membrane; GO:0009986 cell surface; GO:0012505 endomembrane system; GO:0016020 membrane; GO:0016021 integral component of membrane; GO:0030141 secretory granule; GO:0031224 intrinsic component of membrane; GO:0031226 intrinsic component …	GO:0003824 catalytic activity; GO:0005102 receptor binding; GO:0005178 integrin binding; GO:0005488 binding; GO:0005515 protein binding; GO:0008233 peptidase activity; GO:0008237 metallopeptidase activity; GO:0016787 hydrolase activity; GO:0044877 macromolecular complex binding; GO:0050839 cell adhesion molecule binding; GO:0070011 peptidase activity, acting on L-amino acid peptides;	K06833	ADAM2; disintegrin and metalloproteinase domain-containing protein 2 [EC:3.4.24.-]		PF01421; PF00200	Reprolysin (M12B) family zinc metalloprotease ; Disintegrin
A0A452F361	Alpha-N-acetylgalactosaminide alpha-2,6-sialyltransferase 2(predicted) OS=Capra hircus OX=9925 PE=4 SV=1	0.57	Down	0.00197787	---	30.186	17.1	3	6	3	1.482	1.211	0.953	1.042	1.754	0.779	0.673	0.67	0.833	0.716	nucleus
A0A452F2I0	Pantetheinase(predicted) OS=Capra hircus OX=9925 GN=VNN1 PE=4 SV=1	0.522	Down	0.040817	VNN1	57.435	6.2	3	3	3	1.826	0.843	1.56	1.922	0.76	0.407	0.675	1.141	0.58	0.804	extracellular	GO:0001775 cell activation; GO:0002252 immune effector process; GO:0002263 cell activation involved in immune response; GO:0002274 myeloid leukocyte activation; GO:0002275 myeloid cell activation involved in immune response; GO:0002283 neutrophil activation involved in immune response; GO:0002366 leukocyte activation involved in immune response; GO:0002376 immune system process; GO:0002443 leukoc…	GO:0000323 lytic vacuole; GO:0005576 extracellular region; GO:0005622 intracellular; GO:0005623 cell; GO:0005737 cytoplasm; GO:0005764 lysosome; GO:0005765 lysosomal membrane; GO:0005766 primary lysosome; GO:0005773 vacuole; GO:0005774 vacuolar membrane; GO:0005886 plasma membrane; GO:0012505 endomembrane system; GO:0012506 vesicle membrane; GO:0016020 membrane; GO:0016021 integral component of m…	GO:0003824 catalytic activity; GO:0005488 binding; GO:0005543 phospholipid binding; GO:0008289 lipid binding; GO:0016787 hydrolase activity; GO:0016810 hydrolase activity, acting on carbon-nitrogen (but not peptide) bonds; GO:0016811 hydrolase activity, acting on carbon-nitrogen (but not peptide) bonds, in linear amides; GO:0017159 pantetheine hydrolase activity; GO:0034235 GPI anchor binding; GO…	K08069	VNN; pantetheine hydrolase [EC:3.5.1.92]	chx00770 Pantothenate and CoA biosynthesis - Capra hircus (goat);
A0A452DWR2	Beta-hexosaminidase(predicted) OS=Capra hircus OX=9925 GN=LOC102181993 PE=4 SV=1	1.521	Up	0.026882	LOC102181993	63.155	38.8	21	85	2	0.884	0.821	0.709	0.808	0.935	1.871	1.389	1.154	1.079	0.831	endoplasmic reticulum	GO:0000003 reproduction; GO:0001501 skeletal system development; GO:0001573 ganglioside metabolic process; GO:0001775 cell activation; GO:0002252 immune effector process; GO:0002263 cell activation involved in immune response; GO:0002274 myeloid leukocyte activation; GO:0002275 myeloid cell activation involved in immune response; GO:0002283 neutrophil activation involved in immune response; GO:00…	GO:0000323 lytic vacuole; GO:0001669 acrosomal vesicle; GO:0005576 extracellular region; GO:0005615 extracellular space; GO:0005622 intracellular; GO:0005623 cell; GO:0005737 cytoplasm; GO:0005764 lysosome; GO:0005766 primary lysosome; GO:0005773 vacuole; GO:0005775 vacuolar lumen; GO:0012505 endomembrane system; GO:0016020 membrane; GO:0030141 secretory granule; GO:0031410 cytoplasmic vesicle; G…	GO:0003824 catalytic activity; GO:0004553 hydrolase activity, hydrolyzing O-glycosyl compounds; GO:0004563 beta-N-acetylhexosaminidase activity; GO:0005488 binding; GO:0005515 protein binding; GO:0008194 UDP-glycosyltransferase activity; GO:0008375 acetylglucosaminyltransferase activity; GO:0015929 hexosaminidase activity; GO:0016231 beta-N-acetylglucosaminidase activity; GO:0016740 transferase a…	K12373	HEXA_B; hexosaminidase [EC:3.2.1.52]	chx00511 Other glycan degradation - Capra hircus (goat); chx00513 Various types of N-glycan biosynthesis - Capra hircus (goat); chx00520 Amino sugar and nucleotide sugar metabolism - Capra hircus (goat); chx00531 Glycosaminoglycan degradation - Capra hircus (goat); chx00603 Glycosphingolipid biosynthesis - globo and isoglobo series - Capra hircus (goat); chx00604 Glycosphingolipid biosynthesis - …	PF00728	Glycosyl hydrolase family 20, catalytic domain
A0A452DQ07	26S proteasome non-ATPase regulatory subunit 3(predicted) OS=Capra hircus OX=9925 GN=PSMD3 PE=4 SV=1	1.737	Up	0.00016256	PSMD3	60.972	41.2	22	39	22	0.791	0.782	0.661	0.786	0.728	1.48	1.46	0.987	1.225	1.359	cytoplasm	GO:0001775 cell activation; GO:0002252 immune effector process; GO:0002263 cell activation involved in immune response; GO:0002274 myeloid leukocyte activation; GO:0002275 myeloid cell activation involved in immune response; GO:0002283 neutrophil activation involved in immune response; GO:0002366 leukocyte activation involved in immune response; GO:0002376 immune system process; GO:0002443 leukoc…	GO:0000502 proteasome complex; GO:0005576 extracellular region; GO:0005622 intracellular; GO:0005623 cell; GO:0005634 nucleus; GO:0005654 nucleoplasm; GO:0005737 cytoplasm; GO:0005829 cytosol; GO:0005838 proteasome regulatory particle; GO:0008541 proteasome regulatory particle, lid subcomplex; GO:0012505 endomembrane system; GO:0022624 proteasome accessory complex; GO:0030141 secretory granule; G…		K03033	PSMD3, RPN3; 26S proteasome regulatory subunit N3	chx03050 Proteasome - Capra hircus (goat); chx05169 Epstein-Barr virus infection - Capra hircus (goat);	PF01399	PCI domain
A0A452FE46	WD repeat-containing protein 26 isoform X2(predicted) OS=Capra hircus OX=9925 GN=WDR26 PE=4 SV=1	1.562	Up	0.00030423	WDR26	70.052	4.2	3	3	3	0.801	0.862	0.709	0.857	0.841	1.592	1.282	1.119	1.139	1.227	nucleus		GO:0005622 intracellular; GO:0005623 cell; GO:0005634 nucleus; GO:0005654 nucleoplasm; GO:0005737 cytoplasm; GO:0005829 cytosol; GO:0031974 membrane-enclosed lumen; GO:0031981 nuclear lumen; GO:0043226 organelle; GO:0043227 membrane-bounded organelle; GO:0043229 intracellular organelle; GO:0043231 intracellular membrane-bounded organelle; GO:0043233 organelle lumen; GO:0044422 organelle part; GO:…		K22382
A0A452E5L4	Beta defensin OBD130(predicted) OS=Capra hircus OX=9925 GN=LOC108634084 PE=4 SV=1	0.574	Down	0.0036604	LOC108634084	8.8636	29.1	2	4	2	1.243	0.94	1.768	1.336	1.221	0.936	0.714	0.58	0.637	0.87	extracellular	GO:0001562 response to protozoan; GO:0001906 cell killing; GO:0002376 immune system process; GO:0006950 response to stress; GO:0006952 defense response; GO:0006955 immune response; GO:0006959 humoral immune response; GO:0009605 response to external stimulus; GO:0009607 response to biotic stimulus; GO:0009987 cellular process; GO:0019730 antimicrobial humoral response; GO:0019835 cytolysis; GO:003…	GO:0018995 host; GO:0030430 host cell cytoplasm; GO:0033643 host cell part; GO:0033646 host intracellular part; GO:0033655 host cell cytoplasm part; GO:0043656 intracellular region of host; GO:0043657 host cell; GO:0044164 host cell cytosol; GO:0044215 other organism; GO:0044216 other organism cell; GO:0044217 other organism part;
A0A452DRH7	Chromosome 9 C6orf203 homolog(predicted) OS=Capra hircus OX=9925 GN=C6orf203 PE=4 SV=1	0.563	Down	0.0133397	C6orf203	27.687	6.7	2	2	2	1.315	1.805	0.772	1.102	1.67	0.98	0.752	0.626	0.741	0.65	mitochondria
A0A452DYL2	Phosphoinositide-3-kinase-interacting protein 1(predicted) OS=Capra hircus OX=9925 GN=PIK3IP1 PE=4 SV=1	0.655	Down	0.0125387	PIK3IP1	27.556	4.3	1	1	1	0.931	1.155	1.462	1.327	1.484	0.837	0.778	1.163	0.769	0.615	extracellular	GO:0009892 negative regulation of metabolic process; GO:0009966 regulation of signal transduction; GO:0009968 negative regulation of signal transduction; GO:0010563 negative regulation of phosphorus metabolic process; GO:0010646 regulation of cell communication; GO:0010648 negative regulation of cell communication; GO:0014066 regulation of phosphatidylinositol 3-kinase signaling; GO:0014067 negat…		GO:0005488 binding; GO:0005515 protein binding; GO:0019899 enzyme binding; GO:0019900 kinase binding; GO:0036313 phosphatidylinositol 3-kinase catalytic subunit binding; GO:0043548 phosphatidylinositol 3-kinase binding;				PF00051	Kringle domain
A0A452FC89	Hyaluronidase(predicted) OS=Capra hircus OX=9925 GN=LOC100860748 PE=4 SV=1	0.451	Down	1.1113e-06	LOC100860748	61.885	38.3	25	106	25	1.565	1.466	1.133	1.358	1.482	0.671	0.576	0.581	0.672	0.659	mitochondria	GO:0000003 reproduction; GO:0005975 carbohydrate metabolic process; GO:0007338 single fertilization; GO:0007339 binding of sperm to zona pellucida; GO:0007341 penetration of zona pellucida; GO:0008037 cell recognition; GO:0008152 metabolic process; GO:0009566 fertilization; GO:0009987 cellular process; GO:0009988 cell-cell recognition; GO:0019953 sexual reproduction; GO:0022414 reproductive proce…	GO:0001669 acrosomal vesicle; GO:0002079 inner acrosomal membrane; GO:0002080 acrosomal membrane; GO:0005622 intracellular; GO:0005623 cell; GO:0005737 cytoplasm; GO:0005886 plasma membrane; GO:0009897 external side of plasma membrane; GO:0009986 cell surface; GO:0012505 endomembrane system; GO:0012506 vesicle membrane; GO:0016020 membrane; GO:0030141 secretory granule; GO:0030659 cytoplasmic ves…	GO:0003824 catalytic activity; GO:0004415 hyalurononglucosaminidase activity; GO:0004553 hydrolase activity, hydrolyzing O-glycosyl compounds; GO:0015929 hexosaminidase activity; GO:0016787 hydrolase activity; GO:0016798 hydrolase activity, acting on glycosyl bonds;	K01197	hya; hyaluronoglucosaminidase [EC:3.2.1.35]	chx00531 Glycosaminoglycan degradation - Capra hircus (goat); chx01100 Metabolic pathways - Capra hircus (goat);	PF01630	Hyaluronidase
A0A452EY51	Nipsnap homolog 3A OS=Capra hircus OX=9925 GN=NIPSNAP3A PE=4 SV=1	0.494	Down	4.0925e-05	NIPSNAP3A	28.6	22.4	7	11	7	1.506	1.427	1.241	1.414	1.298	0.596	0.61	0.717	0.582	0.9	extracellular		GO:0005622 intracellular; GO:0005623 cell; GO:0005737 cytoplasm; GO:0005739 mitochondrion; GO:0005829 cytosol; GO:0043226 organelle; GO:0043227 membrane-bounded organelle; GO:0043229 intracellular organelle; GO:0043231 intracellular membrane-bounded organelle; GO:0044424 intracellular part; GO:0044444 cytoplasmic part; GO:0044464 cell part;					PF07978	NIPSNAP
A0A452DPV3	Phosphoglycerate kinase(predicted) OS=Capra hircus OX=9925 GN=PGK2 PE=4 SV=1	1.784	Up	0.0028551	PGK2	44.7	79.1	38	177	28	0.704	0.83	0.618	0.711	0.83	1.681	1.545	0.889	1.068	1.405	cytoplasm	GO:0005975 carbohydrate metabolic process; GO:0006082 organic acid metabolic process; GO:0006090 pyruvate metabolic process; GO:0006091 generation of precursor metabolites and energy; GO:0006096 glycolytic process; GO:0006139 nucleobase-containing compound metabolic process; GO:0006163 purine nucleotide metabolic process; GO:0006164 purine nucleotide biosynthetic process; GO:0006165 nucleoside di…	GO:0005623 cell; GO:0005929 cilium; GO:0031514 motile cilium; GO:0035686 sperm fibrous sheath; GO:0036126 sperm flagellum; GO:0042995 cell projection; GO:0043226 organelle; GO:0044422 organelle part; GO:0044441 ciliary part; GO:0044463 cell projection part; GO:0044464 cell part; GO:0097223 sperm part; GO:0097729 9+2 motile cilium;	GO:0000166 nucleotide binding; GO:0003824 catalytic activity; GO:0004618 phosphoglycerate kinase activity; GO:0005488 binding; GO:0005524 ATP binding; GO:0008144 drug binding; GO:0016301 kinase activity; GO:0016740 transferase activity; GO:0016772 transferase activity, transferring phosphorus-containing groups; GO:0016774 phosphotransferase activity, carboxyl group as acceptor; GO:0017076 purine …	K00927	PGK, pgk; phosphoglycerate kinase [EC:2.7.2.3]	chx00010 Glycolysis / Gluconeogenesis - Capra hircus (goat); chx01100 Metabolic pathways - Capra hircus (goat); chx01200 Carbon metabolism - Capra hircus (goat); chx01230 Biosynthesis of amino acids - Capra hircus (goat); chx04066 HIF-1 signaling pathway - Capra hircus (goat);	PF00162	Phosphoglycerate kinase
A0A452F824	MGC157332 protein(predicted) OS=Capra hircus OX=9925 GN=LUZP2 PE=4 SV=1	0.442	Down	4.9468e-06	LUZP2	30.083	57.2	16	28	16	1.608	1.502	1.034	1.454	1.488	0.568	0.623	0.632	0.64	0.669	cytoplasm
A0A452EE69	Ig alpha-1 chain C region (Fragment)(predicted) OS=Capra hircus OX=9925 PE=4 SV=1	0.297	Down	0.034595	---	14.514	45.8	5	18	5	0.602	2.634	1.082	0.752	2.833	0.377	0.47	0.463	0.489	0.551	extracellular				K06856	IGH; immunoglobulin heavy chain		PF07654	Immunoglobulin C1-set domain
A0A452E2F6	Alpha-1-acid glycoprotein(predicted) OS=Capra hircus OX=9925 GN=AGP PE=4 SV=1	0.501	Down	0.00087767	AGP	23.131	17.3	3	4	3	1.594	1.451	0.862	1.582	1.466	0.755	0.781	0.741	0.65	0.557	extracellular	GO:0001101 response to acid chemical; GO:0001775 cell activation; GO:0001817 regulation of cytokine production; GO:0001818 negative regulation of cytokine production; GO:0001819 positive regulation of cytokine production; GO:0002237 response to molecule of bacterial origin; GO:0002252 immune effector process; GO:0002263 cell activation involved in immune response; GO:0002274 myeloid leukocyte act…	GO:0000323 lytic vacuole; GO:0005576 extracellular region; GO:0005615 extracellular space; GO:0005622 intracellular; GO:0005623 cell; GO:0005737 cytoplasm; GO:0005764 lysosome; GO:0005766 primary lysosome; GO:0005773 vacuole; GO:0005775 vacuolar lumen; GO:0012505 endomembrane system; GO:0030141 secretory granule; GO:0031091 platelet alpha granule; GO:0031093 platelet alpha granule lumen; GO:00314…	GO:0005488 binding; GO:0008144 drug binding;	K17308	ORM1, AGP1; alpha-1-acid glycoprotein 1		PF00061	Lipocalin / cytosolic fatty-acid binding protein family
A0A452DWD6	Zona pellucida binding protein(predicted) OS=Capra hircus OX=9925 GN=ZPBP PE=4 SV=1	0.381	Down	2.1295e-05	ZPBP	39.559	39.7	15	48	15	1.84	1.568	1.026	1.426	1.408	0.492	0.496	0.556	0.651	0.576	extracellular	GO:0000003 reproduction; GO:0001675 acrosome assembly; GO:0003006 developmental process involved in reproduction; GO:0006996 organelle organization; GO:0007276 gamete generation; GO:0007281 germ cell development; GO:0007283 spermatogenesis; GO:0007286 spermatid development; GO:0007338 single fertilization; GO:0007339 binding of sperm to zona pellucida; GO:0008037 cell recognition; GO:0009566 fert…	GO:0001669 acrosomal vesicle; GO:0002199 zona pellucida receptor complex; GO:0005622 intracellular; GO:0005623 cell; GO:0005737 cytoplasm; GO:0012505 endomembrane system; GO:0030141 secretory granule; GO:0031410 cytoplasmic vesicle; GO:0031982 vesicle; GO:0032991 macromolecular complex; GO:0043226 organelle; GO:0043227 membrane-bounded organelle; GO:0043229 intracellular organelle; GO:0044297 cel…
A0A452DT04	tumor necrosis factor alpha-induced protein 2(predicted) OS=Capra hircus OX=9925 GN=TNFAIP2 PE=4 SV=1	1.686	Up	0.028915	TNFAIP2	73.597	3.7	3	3	3	0.743	0.781	0.657	0.75	0.748	0.799	1.44	0.901	1.432	1.63	cytoplasm				K19989	TNFAIP2, EXOC3L3; tumor necrosis factor alpha-induced protein 2
Q9XSQ9	Bac7.5 protein OS=Capra hircus OX=9925 GN=bac7.5 PE=2 SV=1	0.464	Down	0.0002225	bac7.5	21.835	22.1	4	5	3	1.321	1.171	1.082	2.045	1.321	0.626	0.591	0.59	0.682	0.73	extracellular	GO:0001775 cell activation; GO:0001817 regulation of cytokine production; GO:0001819 positive regulation of cytokine production; GO:0001878 response to yeast; GO:0001906 cell killing; GO:0001932 regulation of protein phosphorylation; GO:0001934 positive regulation of protein phosphorylation; GO:0002227 innate immune response in mucosa; GO:0002251 organ or tissue specific immune response; GO:00022…	GO:0005576 extracellular region; GO:0005615 extracellular space; GO:0005622 intracellular; GO:0005623 cell; GO:0005737 cytoplasm; GO:0012505 endomembrane system; GO:0030141 secretory granule; GO:0031410 cytoplasmic vesicle; GO:0031974 membrane-enclosed lumen; GO:0031982 vesicle; GO:0031983 vesicle lumen; GO:0034774 secretory granule lumen; GO:0035580 specific granule lumen; GO:0042581 specific gr…		K13916	CAMP, LL37; cathelicidin antimicrobial peptide	chx04621 NOD-like receptor signaling pathway - Capra hircus (goat); chx04970 Salivary secretion - Capra hircus (goat); chx05150 Staphylococcus aureus infection - Capra hircus (goat); chx05152 Tuberculosis - Capra hircus (goat);	PF00666	Cathelicidin
A0A452G6D2	6-phosphogluconate dehydrogenase, decarboxylating (Fragment)(predicted) OS=Capra hircus OX=9925 GN=PGD PE=4 SV=1	1.507	Up	0.0026414	PGD	51.98	29.2	13	15	13	0.755	0.89	0.737	0.799	0.927	1.479	1.403	0.938	1.118	1.252	cytoplasm,nucleus	GO:0005975 carbohydrate metabolic process; GO:0005996 monosaccharide metabolic process; GO:0006081 cellular aldehyde metabolic process; GO:0006082 organic acid metabolic process; GO:0006098 pentose-phosphate shunt; GO:0006139 nucleobase-containing compound metabolic process; GO:0006725 cellular aromatic compound metabolic process; GO:0006732 coenzyme metabolic process; GO:0006733 oxidoreduction c…	GO:0005622 intracellular; GO:0005623 cell; GO:0005737 cytoplasm; GO:0005829 cytosol; GO:0043226 organelle; GO:0043227 membrane-bounded organelle; GO:0043229 intracellular organelle; GO:0043231 intracellular membrane-bounded organelle; GO:0044424 intracellular part; GO:0044444 cytoplasmic part; GO:0044464 cell part;	GO:0000166 nucleotide binding; GO:0003824 catalytic activity; GO:0004616 phosphogluconate dehydrogenase (decarboxylating) activity; GO:0005488 binding; GO:0016491 oxidoreductase activity; GO:0016614 oxidoreductase activity, acting on CH-OH group of donors; GO:0016616 oxidoreductase activity, acting on the CH-OH group of donors, NAD or NADP as acceptor; GO:0030246 carbohydrate binding; GO:0031406 …	K00033	PGD, gnd, gntZ; 6-phosphogluconate dehydrogenase [EC:1.1.1.44 1.1.1.343]	chx00030 Pentose phosphate pathway - Capra hircus (goat); chx00480 Glutathione metabolism - Capra hircus (goat); chx01100 Metabolic pathways - Capra hircus (goat); chx01200 Carbon metabolism - Capra hircus (goat);	PF03446; PF00393	NAD binding domain of 6-phosphogluconate dehydrogenase; 6-phosphogluconate dehydrogenase, C-terminal domain
A0A452DN51	Trafficking protein particle complex subunit 5(predicted) OS=Capra hircus OX=9925 GN=TRAPPC5 PE=4 SV=1	1.747	Up	6.1676e-05	TRAPPC5	20.767	13.3	3	3	3	0.733	0.706	0.853	0.739	0.758	1.267	1.657	1.131	1.214	1.349	mitochondria	GO:0006810 transport; GO:0006888 ER to Golgi vesicle-mediated transport; GO:0006900 membrane budding; GO:0006901 vesicle coating; GO:0006903 vesicle targeting; GO:0006996 organelle organization; GO:0009987 cellular process; GO:0016043 cellular component organization; GO:0016050 vesicle organization; GO:0016192 vesicle-mediated transport; GO:0022607 cellular component assembly; GO:0043933 macromol…	GO:0005622 intracellular; GO:0005623 cell; GO:0005737 cytoplasm; GO:0005829 cytosol; GO:0030008 TRAPP complex; GO:0032991 macromolecular complex; GO:0044424 intracellular part; GO:0044444 cytoplasmic part; GO:0044464 cell part; GO:0099023 tethering complex;	GO:0005085 guanyl-nucleotide exchange factor activity; GO:0005088 Ras guanyl-nucleotide exchange factor activity; GO:0005488 binding; GO:0005515 protein binding; GO:0017016 Ras GTPase binding; GO:0017112 Rab guanyl-nucleotide exchange factor activity; GO:0017137 Rab GTPase binding; GO:0019899 enzyme binding; GO:0031267 small GTPase binding; GO:0051020 GTPase binding; GO:0098772 molecular function…	K20280	TRAPPC5, TRS31; trafficking protein particle complex subunit 5
A0A452F097	Dynein axonemal heavy chain 10(predicted) OS=Capra hircus OX=9925 GN=DNAH10 PE=4 SV=1	0.545	Down	0.0097558	DNAH10	521.8	0.9	4	4	3	1.778	0.87	1.126	1.819	1.174	0.505	0.73	0.939	0.769	0.744	cytoplasm	GO:0006928 movement of cell or subcellular component; GO:0007017 microtubule-based process; GO:0007018 microtubule-based movement; GO:0009987 cellular process;	GO:0005622 intracellular; GO:0005623 cell; GO:0005856 cytoskeleton; GO:0005875 microtubule associated complex; GO:0015630 microtubule cytoskeleton; GO:0030286 dynein complex; GO:0032991 macromolecular complex; GO:0043226 organelle; GO:0043228 non-membrane-bounded organelle; GO:0043229 intracellular organelle; GO:0043232 intracellular non-membrane-bounded organelle; GO:0044422 organelle part; GO:0…	GO:0003774 motor activity; GO:0003777 microtubule motor activity; GO:0003824 catalytic activity; GO:0005488 binding; GO:0005515 protein binding; GO:0008569 ATP-dependent microtubule motor activity, minus-end-directed; GO:0016462 pyrophosphatase activity; GO:0016787 hydrolase activity; GO:0016817 hydrolase activity, acting on acid anhydrides; GO:0016818 hydrolase activity, acting on acid anhydride…	K10408	DNAH; dynein heavy chain, axonemal	chx05016 Huntington disease - Capra hircus (goat);	PF12774; PF12775; PF12780; PF12777; PF12781; PF03028	Hydrolytic ATP binding site of dynein motor region D1; P-loop containing dynein motor region D3; P-loop containing dynein motor region D4; Microtubule-binding stalk of dynein motor; ATP-binding dynein motor region D5; Dynein heavy chain and region D6 of dynein motor
A0A452EUY4	Fibrous sheath CABYR-binding protein(predicted) OS=Capra hircus OX=9925 GN=FSCB PE=4 SV=1	0.289	Down	0.00145953	FSCB	88.055	6.5	6	8	6	1.324	2.198	0.803	1.132	2.524	0.386	0.473	0.287	0.547	0.61	nucleus	GO:0009892 negative regulation of metabolic process; GO:0010605 negative regulation of macromolecule metabolic process; GO:0019222 regulation of metabolic process; GO:0031323 regulation of cellular metabolic process; GO:0031324 negative regulation of cellular metabolic process; GO:0031399 regulation of protein modification process; GO:0031400 negative regulation of protein modification process; G…	GO:0005623 cell; GO:0005929 cilium; GO:0031514 motile cilium; GO:0035686 sperm fibrous sheath; GO:0036126 sperm flagellum; GO:0042995 cell projection; GO:0043226 organelle; GO:0044422 organelle part; GO:0044441 ciliary part; GO:0044463 cell projection part; GO:0044464 cell part; GO:0097223 sperm part; GO:0097228 sperm principal piece; GO:0097729 9+2 motile cilium;	GO:0005488 binding; GO:0005509 calcium ion binding; GO:0043167 ion binding; GO:0043169 cation binding; GO:0046872 metal ion binding;
A0A452F550	26S proteasome non-ATPase regulatory subunit 7 isoform X2(predicted) OS=Capra hircus OX=9925 GN=PSMD7 PE=4 SV=1	1.559	Up	0.0003755	PSMD7	36.738	21.4	7	7	7	0.871	0.81	0.719	0.776	0.848	1.332	1.439	0.974	1.227	1.3	endoplasmic reticulum	GO:0001775 cell activation; GO:0002252 immune effector process; GO:0002263 cell activation involved in immune response; GO:0002274 myeloid leukocyte activation; GO:0002275 myeloid cell activation involved in immune response; GO:0002283 neutrophil activation involved in immune response; GO:0002366 leukocyte activation involved in immune response; GO:0002376 immune system process; GO:0002443 leukoc…	GO:0000502 proteasome complex; GO:0005576 extracellular region; GO:0005622 intracellular; GO:0005623 cell; GO:0005634 nucleus; GO:0005654 nucleoplasm; GO:0005737 cytoplasm; GO:0005829 cytosol; GO:0005838 proteasome regulatory particle; GO:0012505 endomembrane system; GO:0022624 proteasome accessory complex; GO:0030141 secretory granule; GO:0031410 cytoplasmic vesicle; GO:0031974 membrane-enclosed…	GO:0005488 binding; GO:0005515 protein binding; GO:0042802 identical protein binding; GO:0042803 protein homodimerization activity; GO:0046983 protein dimerization activity;	K03038	PSMD7, RPN8; 26S proteasome regulatory subunit N8	chx03050 Proteasome - Capra hircus (goat); chx05169 Epstein-Barr virus infection - Capra hircus (goat);
A0A452F6P6	Keratin, type II cytoskeletal 8(predicted) OS=Capra hircus OX=9925 GN=KRT8 PE=4 SV=1	0.641	Down	0.0046373	KRT8	52.892	24.4	11	9	3	1.012	1.17	1.651	1.15	1.324	0.614	0.78	0.982	0.788	0.881	nucleus	GO:0007275 multicellular organism development; GO:0008219 cell death; GO:0008544 epidermis development; GO:0009888 tissue development; GO:0009913 epidermal cell differentiation; GO:0009987 cellular process; GO:0012501 programmed cell death; GO:0030154 cell differentiation; GO:0030216 keratinocyte differentiation; GO:0030855 epithelial cell differentiation; GO:0031424 keratinization; GO:0032501 mu…	GO:0005622 intracellular; GO:0005623 cell; GO:0005737 cytoplasm; GO:0005829 cytosol; GO:0005856 cytoskeleton; GO:0005882 intermediate filament; GO:0043226 organelle; GO:0043228 non-membrane-bounded organelle; GO:0043229 intracellular organelle; GO:0043232 intracellular non-membrane-bounded organelle; GO:0044422 organelle part; GO:0044424 intracellular part; GO:0044430 cytoskeletal part; GO:004444…	GO:0005488 binding; GO:0005515 protein binding; GO:0097110 scaffold protein binding;	K07605	KRT2; type II keratin, basic
A0A452EPM2	Coilin(predicted) OS=Capra hircus OX=9925 GN=COIL PE=4 SV=1	0.659	Down	0.0028838	COIL	63.11	1.8	1	1	1	1.396	0.988	1.481	1.238	1.196	0.659	0.749	0.886	0.888	0.969	nucleus	GO:0008152 metabolic process; GO:0055114 oxidation-reduction process;	GO:0001650 fibrillar center; GO:0001674 female germ cell nucleus; GO:0005622 intracellular; GO:0005623 cell; GO:0005634 nucleus; GO:0005654 nucleoplasm; GO:0005730 nucleolus; GO:0015030 Cajal body; GO:0016604 nuclear body; GO:0031974 membrane-enclosed lumen; GO:0031981 nuclear lumen; GO:0043073 germ cell nucleus; GO:0043226 organelle; GO:0043227 membrane-bounded organelle; GO:0043228 non-membrane…	GO:0003824 catalytic activity; GO:0005488 binding; GO:0005515 protein binding; GO:0008022 protein C-terminus binding; GO:0015036 disulfide oxidoreductase activity; GO:0016491 oxidoreductase activity; GO:0016667 oxidoreductase activity, acting on a sulfur group of donors; GO:0042802 identical protein binding;	K13150	COIL, CLN80; coilin
A0A452FT76	probable E3 ubiquitin-protein ligase MARCH10(predicted) OS=Capra hircus OX=9925 GN=MARCH10 PE=4 SV=1	0.496	Down	0.00076307	MARCH10	26.337	4.2	1	1	1	1.307	1.326	1.33	1.147	1.851	0.723	0.477	0.581	0.862	0.808	nucleus				K10665	MARCH10; E3 ubiquitin-protein ligase MARCH10 [EC:2.3.2.27]
A0A452FDQ9	BCL2-associated athanogene 4 (Fragment)(predicted) OS=Capra hircus OX=9925 GN=BAG4 PE=4 SV=1	1.76	Up	0.0051192	BAG4	49.426	4.8	2	4	2	0.89	0.66	0.677	0.95	0.597	1.777	1.577	1.04	0.989	1.259	nucleus	GO:0001932 regulation of protein phosphorylation; GO:0001934 positive regulation of protein phosphorylation; GO:0006457 protein folding; GO:0007154 cell communication; GO:0007165 signal transduction; GO:0007166 cell surface receptor signaling pathway; GO:0008064 regulation of actin polymerization or depolymerization; GO:0008104 protein localization; GO:0009719 response to endogenous stimulus; GO:…	GO:0005622 intracellular; GO:0005623 cell; GO:0005634 nucleus; GO:0005737 cytoplasm; GO:0005829 cytosol; GO:0005886 plasma membrane; GO:0016020 membrane; GO:0043226 organelle; GO:0043227 membrane-bounded organelle; GO:0043229 intracellular organelle; GO:0043231 intracellular membrane-bounded organelle; GO:0044424 intracellular part; GO:0044444 cytoplasmic part; GO:0044464 cell part; GO:0071944 ce…	GO:0000166 nucleotide binding; GO:0000774 adenyl-nucleotide exchange factor activity; GO:0005488 binding; GO:0005515 protein binding; GO:0017076 purine nucleotide binding; GO:0019899 enzyme binding; GO:0030234 enzyme regulator activity; GO:0030554 adenyl nucleotide binding; GO:0031625 ubiquitin protein ligase binding; GO:0036094 small molecule binding; GO:0044389 ubiquitin-like protein ligase bin…
A0A452FTL9	Vesicle-associated membrane protein-associated protein B(predicted) OS=Capra hircus OX=9925 GN=VAPB PE=4 SV=1	0.526	Down	1.9092e-06	VAPB	27.156	26.3	6	8	5	1.511	1.344	1.322	1.401	1.299	0.793	0.626	0.644	0.773	0.781	cytoplasm	GO:0006629 lipid metabolic process; GO:0006643 membrane lipid metabolic process; GO:0006665 sphingolipid metabolic process; GO:0006807 nitrogen compound metabolic process; GO:0006810 transport; GO:0006873 cellular ion homeostasis; GO:0006874 cellular calcium ion homeostasis; GO:0006875 cellular metal ion homeostasis; GO:0006888 ER to Golgi vesicle-mediated transport; GO:0006900 membrane budding; …	GO:0005622 intracellular; GO:0005623 cell; GO:0005737 cytoplasm; GO:0005783 endoplasmic reticulum; GO:0005789 endoplasmic reticulum membrane; GO:0005794 Golgi apparatus; GO:0012505 endomembrane system; GO:0016020 membrane; GO:0031984 organelle subcompartment; GO:0042175 nuclear outer membrane-endoplasmic reticulum membrane network; GO:0043226 organelle; GO:0043227 membrane-bounded organelle; GO:0…	GO:0005488 binding; GO:0005515 protein binding; GO:0008017 microtubule binding; GO:0008092 cytoskeletal protein binding; GO:0015631 tubulin binding; GO:0019899 enzyme binding; GO:0019904 protein domain specific binding; GO:0033149 FFAT motif binding; GO:0042802 identical protein binding; GO:0042803 protein homodimerization activity; GO:0046982 protein heterodimerization activity; GO:0046983 prote…	K10707	VAPB, ALS8; vesicle-associated membrane protein-associated protein B	chx04979 Cholesterol metabolism - Capra hircus (goat);	PF00635	MSP (Major sperm protein) domain
A0A452E954	unconventional myosin-XVIIIa isoform X5(predicted) OS=Capra hircus OX=9925 GN=MYO18A PE=4 SV=1	3.164	Up	0.034799	MYO18A	232.16	0.3	1	1	1	0.515	0.51	0.788	0.285	0.364	0.61	0.591	1.073	2.246	3.27	nucleus	GO:0002376 immune system process; GO:0002682 regulation of immune system process; GO:0002684 positive regulation of immune system process; GO:0002694 regulation of leukocyte activation; GO:0002697 regulation of immune effector process; GO:0002699 positive regulation of immune effector process; GO:0002791 regulation of peptide secretion; GO:0002793 positive regulation of peptide secretion; GO:0006…	GO:0005622 intracellular; GO:0005623 cell; GO:0005737 cytoplasm; GO:0005793 endoplasmic reticulum-Golgi intermediate compartment; GO:0005794 Golgi apparatus; GO:0005802 trans-Golgi network; GO:0005856 cytoskeleton; GO:0005903 brush border; GO:0012505 endomembrane system; GO:0015629 actin cytoskeleton; GO:0030139 endocytic vesicle; GO:0031410 cytoplasmic vesicle; GO:0031982 vesicle; GO:0031984 org…	GO:0000166 nucleotide binding; GO:0003779 actin binding; GO:0005488 binding; GO:0005515 protein binding; GO:0005524 ATP binding; GO:0008092 cytoskeletal protein binding; GO:0008144 drug binding; GO:0017076 purine nucleotide binding; GO:0030554 adenyl nucleotide binding; GO:0032553 ribonucleotide binding; GO:0032555 purine ribonucleotide binding; GO:0032559 adenyl ribonucleotide binding; GO:003563…	K10362	MYO18; myosin XVIII		PF00595; PF00063	PDZ domain (Also known as DHR or GLGF); Myosin head (motor domain)
A0A452F0U5	Ubiquitin-protein ligase E3A(predicted) OS=Capra hircus OX=9925 GN=UBE3A PE=4 SV=1	1.566	Up	8.1284e-05	UBE3A	100.36	18.7	13	16	13	0.765	0.828	0.838	0.775	0.828	1.361	1.338	1.014	1.223	1.382	cytoplasm	GO:0000003 reproduction; GO:0000209 protein polyubiquitination; GO:0001541 ovarian follicle development; GO:0001655 urogenital system development; GO:0003006 developmental process involved in reproduction; GO:0006355 regulation of transcription, DNA-templated; GO:0006357 regulation of transcription from RNA polymerase II promoter; GO:0006464 cellular protein modification process; GO:0006508 prote…	GO:0005622 intracellular; GO:0005623 cell; GO:0005634 nucleus; GO:0005737 cytoplasm; GO:0005829 cytosol; GO:0043226 organelle; GO:0043227 membrane-bounded organelle; GO:0043229 intracellular organelle; GO:0043231 intracellular membrane-bounded organelle; GO:0044424 intracellular part; GO:0044444 cytoplasmic part; GO:0044464 cell part;	GO:0003712 transcription cofactor activity; GO:0003713 transcription coactivator activity; GO:0003824 catalytic activity; GO:0004842 ubiquitin-protein transferase activity; GO:0016740 transferase activity; GO:0019787 ubiquitin-like protein transferase activity; GO:0061630 ubiquitin protein ligase activity; GO:0061659 ubiquitin-like protein ligase activity;	K10587	UBE3A, E6AP; ubiquitin-protein ligase E3 A [EC:2.3.2.26]	chx04120 Ubiquitin mediated proteolysis - Capra hircus (goat); chx05165 Human papillomavirus infection - Capra hircus (goat); chx05203 Viral carcinogenesis - Capra hircus (goat);	PF00632	HECT-domain (ubiquitin-transferase)
A0A452G2S9	Doublecortin domain containing 2C(predicted) OS=Capra hircus OX=9925 GN=DCDC2C PE=4 SV=1	0.605	Down	0.0153235	DCDC2C	38.87	20.5	6	7	6	1.177	1.451	0.908	1.071	1.721	0.805	0.776	0.761	0.818	0.67	nucleus		GO:0005622 intracellular; GO:0005623 cell; GO:0005737 cytoplasm; GO:0005929 cilium; GO:0031514 motile cilium; GO:0036126 sperm flagellum; GO:0042995 cell projection; GO:0043226 organelle; GO:0044424 intracellular part; GO:0044464 cell part; GO:0097223 sperm part; GO:0097729 9+2 motile cilium;
A0A452F862	Protein kinase X-linked(predicted) OS=Capra hircus OX=9925 GN=PRKX PE=4 SV=1	2.123	Up	2.0407e-05	PRKX	39.701	6.1	2	2	2	0.723	0.708	0.576	0.656	0.655	1.252	1.529	1.113	1.463	1.688	cytoplasm	GO:0001525 angiogenesis; GO:0001568 blood vessel development; GO:0001655 urogenital system development; GO:0001667 ameboidal-type cell migration; GO:0001822 kidney development; GO:0001935 endothelial cell proliferation; GO:0001944 vasculature development; GO:0002009 morphogenesis of an epithelium; GO:0002376 immune system process; GO:0002520 immune system development; GO:0006464 cellular protein …	GO:0005622 intracellular; GO:0005623 cell; GO:0005634 nucleus; GO:0005737 cytoplasm; GO:0043226 organelle; GO:0043227 membrane-bounded organelle; GO:0043229 intracellular organelle; GO:0043231 intracellular membrane-bounded organelle; GO:0044424 intracellular part; GO:0044464 cell part;	GO:0003824 catalytic activity; GO:0004672 protein kinase activity; GO:0004674 protein serine/threonine kinase activity; GO:0004690 cyclic nucleotide-dependent protein kinase activity; GO:0004691 cAMP-dependent protein kinase activity; GO:0016301 kinase activity; GO:0016740 transferase activity; GO:0016772 transferase activity, transferring phosphorus-containing groups; GO:0016773 phosphotransfera…				PF00069	Protein kinase domain
A0A452FXE9	Angiotensin-converting enzyme(predicted) OS=Capra hircus OX=9925 GN=LOC106503207 PE=4 SV=1	0.278	Down	4.6399e-07	LOC106503207	84.369	14.8	14	18	14	1.944	1.392	1.684	1.799	1.348	0.372	0.409	0.495	0.521	0.477	plasma membrane		GO:0001669 acrosomal vesicle; GO:0005622 intracellular; GO:0005623 cell; GO:0005737 cytoplasm; GO:0012505 endomembrane system; GO:0030141 secretory granule; GO:0031410 cytoplasmic vesicle; GO:0031982 vesicle; GO:0043226 organelle; GO:0043227 membrane-bounded organelle; GO:0043229 intracellular organelle; GO:0044424 intracellular part; GO:0044444 cytoplasmic part; GO:0044464 cell part; GO:0097223 …		K01283	ACE, CD143; peptidyl-dipeptidase A [EC:3.4.15.1]	chx04614 Renin-angiotensin system - Capra hircus (goat); chx04924 Renin secretion - Capra hircus (goat); chx05142 Chagas disease (American trypanosomiasis) - Capra hircus (goat); chx05410 Hypertrophic cardiomyopathy (HCM) - Capra hircus (goat);
A0A452G8M9	Dynein light chain Tctex-type 1(predicted) OS=Capra hircus OX=9925 GN=DYNLT1 PE=4 SV=1	0.56	Down	0.00105893	DYNLT1	12.097	14.5	1	1	1	1.393	1.317	1.001	1.418	1.552	1.01	0.796	0.619	0.631	0.683	cytoplasm	GO:0000132 establishment of mitotic spindle orientation; GO:0000226 microtubule cytoskeleton organization; GO:0000278 mitotic cell cycle; GO:0000902 cell morphogenesis; GO:0001932 regulation of protein phosphorylation; GO:0001933 negative regulation of protein phosphorylation; GO:0006810 transport; GO:0006839 mitochondrial transport; GO:0006886 intracellular protein transport; GO:0006996 organell…	GO:0001917 photoreceptor inner segment; GO:0005622 intracellular; GO:0005623 cell; GO:0005737 cytoplasm; GO:0005794 Golgi apparatus; GO:0005856 cytoskeleton; GO:0005868 cytoplasmic dynein complex; GO:0005874 microtubule; GO:0005875 microtubule associated complex; GO:0005881 cytoplasmic microtubule; GO:0012505 endomembrane system; GO:0015630 microtubule cytoskeleton; GO:0030027 lamellipodium; GO:0…	GO:0005488 binding; GO:0005515 protein binding; GO:0008022 protein C-terminus binding; GO:0030742 GTP-dependent protein binding; GO:0031681 G-protein beta-subunit binding; GO:0042802 identical protein binding;	K10420	DYNLT; dynein light chain Tctex-type 1
A0A452DRW1	F-actin-capping protein subunit alpha(predicted) OS=Capra hircus OX=9925 GN=CAPZA3 PE=4 SV=1	0.277	Down	0.025744	CAPZA3	35.066	15.7	6	8	6	1.114	0.794	4.363	1.106	1.003	0.375	0.503	0.52	0.434	0.488	mitochondria	GO:0000003 reproduction; GO:0002376 immune system process; GO:0002478 antigen processing and presentation of exogenous peptide antigen; GO:0002495 antigen processing and presentation of peptide antigen via MHC class II; GO:0002504 antigen processing and presentation of peptide or polysaccharide antigen via MHC class II; GO:0003006 developmental process involved in reproduction; GO:0006810 transpo…	GO:0001669 acrosomal vesicle; GO:0005622 intracellular; GO:0005623 cell; GO:0005737 cytoplasm; GO:0005829 cytosol; GO:0005856 cytoskeleton; GO:0005938 cell cortex; GO:0012505 endomembrane system; GO:0016020 membrane; GO:0030141 secretory granule; GO:0030863 cortical cytoskeleton; GO:0031410 cytoplasmic vesicle; GO:0031982 vesicle; GO:0043226 organelle; GO:0043227 membrane-bounded organelle; GO:00…
A0A452G300	26S proteasome non-ATPase regulatory subunit 12 (Fragment)(predicted) OS=Capra hircus OX=9925 GN=PSMD12 PE=4 SV=1	1.614	Up	0.0040571	PSMD12	53.02	30.5	15	25	15	0.897	0.753	0.641	0.977	0.731	1.57	1.497	0.935	1.19	1.264	cytoplasm	GO:0001775 cell activation; GO:0002252 immune effector process; GO:0002263 cell activation involved in immune response; GO:0002274 myeloid leukocyte activation; GO:0002275 myeloid cell activation involved in immune response; GO:0002283 neutrophil activation involved in immune response; GO:0002366 leukocyte activation involved in immune response; GO:0002376 immune system process; GO:0002443 leukoc…	GO:0000502 proteasome complex; GO:0005576 extracellular region; GO:0005622 intracellular; GO:0005623 cell; GO:0005634 nucleus; GO:0005654 nucleoplasm; GO:0005737 cytoplasm; GO:0005829 cytosol; GO:0005838 proteasome regulatory particle; GO:0008541 proteasome regulatory particle, lid subcomplex; GO:0012505 endomembrane system; GO:0022624 proteasome accessory complex; GO:0030141 secretory granule; G…					PF01399	PCI domain
A0A452DL66	cysteine-rich protein 1 isoform X2(predicted) OS=Capra hircus OX=9925 GN=CRIP1 PE=4 SV=1	1.947	Up	0.00020081	CRIP1	8.5027	10.4	1	1	1	0.721	0.596	0.941	0.544	0.749	1.38	1.158	1.466	1.497	1.414	nucleus	GO:0000003 reproduction; GO:0001655 urogenital system development; GO:0002376 immune system process; GO:0003006 developmental process involved in reproduction; GO:0006915 apoptotic process; GO:0006950 response to stress; GO:0006955 immune response; GO:0006974 cellular response to DNA damage stimulus; GO:0007154 cell communication; GO:0007165 signal transduction; GO:0007275 multicellular organism …	GO:0005622 intracellular; GO:0005623 cell; GO:0005737 cytoplasm; GO:0044424 intracellular part; GO:0044464 cell part;	GO:0003676 nucleic acid binding; GO:0003677 DNA binding; GO:0003680 AT DNA binding; GO:0003690 double-stranded DNA binding; GO:0005488 binding; GO:0008270 zinc ion binding; GO:0008301 DNA binding, bending; GO:0033218 amide binding; GO:0042277 peptide binding; GO:0043167 ion binding; GO:0043169 cation binding; GO:0043565 sequence-specific DNA binding; GO:0046872 metal ion binding; GO:0046914 trans…				PF00412	LIM domain
A0A452FZR8	Oxidoreductase HTATIP2(predicted) OS=Capra hircus OX=9925 GN=HTATIP2 PE=4 SV=1	2.041	Up	0.0035646	HTATIP2	27.12	19.4	5	5	5	0.667	0.752	0.656	0.634	0.664	1.284	1.769	0.916	1.464	1.451	nucleus	GO:0006355 regulation of transcription, DNA-templated; GO:0006357 regulation of transcription from RNA polymerase II promoter; GO:0006464 cellular protein modification process; GO:0006468 protein phosphorylation; GO:0006793 phosphorus metabolic process; GO:0006796 phosphate-containing compound metabolic process; GO:0006807 nitrogen compound metabolic process; GO:0006810 transport; GO:0006913 nucl…	GO:0005622 intracellular; GO:0005623 cell; GO:0005634 nucleus; GO:0005635 nuclear envelope; GO:0005737 cytoplasm; GO:0005829 cytosol; GO:0012505 endomembrane system; GO:0031967 organelle envelope; GO:0031975 envelope; GO:0043226 organelle; GO:0043227 membrane-bounded organelle; GO:0043229 intracellular organelle; GO:0043231 intracellular membrane-bounded organelle; GO:0044422 organelle part; GO:0…	GO:0003712 transcription cofactor activity; GO:0003713 transcription coactivator activity; GO:0003824 catalytic activity; GO:0004672 protein kinase activity; GO:0004674 protein serine/threonine kinase activity; GO:0016301 kinase activity; GO:0016740 transferase activity; GO:0016772 transferase activity, transferring phosphorus-containing groups; GO:0016773 phosphotransferase activity, alcohol gro…	K17290	HTATIP2; oxidoreductase [EC:1.1.1.-]		PF13460	NADH(P)-binding
A0A452E2A7	Coiled-coil domain containing 8(predicted) OS=Capra hircus OX=9925 GN=CCDC8 PE=4 SV=1	2.429	Up	4.0387e-06	CCDC8	56.253	2	1	2	1	0.63	0.636	0.67	0.581	0.55	1.218	1.37	1.97	1.423	1.47	nucleus	GO:0000226 microtubule cytoskeleton organization; GO:0006464 cellular protein modification process; GO:0006807 nitrogen compound metabolic process; GO:0006996 organelle organization; GO:0007010 cytoskeleton organization; GO:0007017 microtubule-based process; GO:0007088 regulation of mitotic nuclear division; GO:0007346 regulation of mitotic cell cycle; GO:0008152 metabolic process; GO:0009892 neg…	GO:0005622 intracellular; GO:0005623 cell; GO:0005634 nucleus; GO:0005737 cytoplasm; GO:0005813 centrosome; GO:0005815 microtubule organizing center; GO:0005829 cytosol; GO:0005856 cytoskeleton; GO:0005886 plasma membrane; GO:0015630 microtubule cytoskeleton; GO:0016020 membrane; GO:0032991 macromolecular complex; GO:0043226 organelle; GO:0043227 membrane-bounded organelle; GO:0043228 non-membran…		K17561	CCDC8; coiled-coil domain-containing protein 8
A0A452F9Q7	Mitochondria-eating protein(predicted) OS=Capra hircus OX=9925 GN=SPATA18 PE=4 SV=1	0.513	Down	0.00114409	SPATA18	63.127	23.3	10	18	10	1.583	1.401	0.954	1.219	1.71	0.957	0.6	0.631	0.716	0.616	cytoplasm	GO:0000003 reproduction; GO:0000422 mitophagy; GO:0006807 nitrogen compound metabolic process; GO:0006914 autophagy; GO:0006950 response to stress; GO:0006974 cellular response to DNA damage stimulus; GO:0006996 organelle organization; GO:0007005 mitochondrion organization; GO:0007276 gamete generation; GO:0007283 spermatogenesis; GO:0008152 metabolic process; GO:0009056 catabolic process; GO:000…	GO:0005622 intracellular; GO:0005623 cell; GO:0005737 cytoplasm; GO:0005739 mitochondrion; GO:0005740 mitochondrial envelope; GO:0005741 mitochondrial outer membrane; GO:0005929 cilium; GO:0016020 membrane; GO:0019867 outer membrane; GO:0031090 organelle membrane; GO:0031514 motile cilium; GO:0031966 mitochondrial membrane; GO:0031967 organelle envelope; GO:0031968 organelle outer membrane; GO:00…		K22257	SPATA18; mitochondria-eating protein
A0A452F3R4	Coiled-coil domain-containing protein 105(predicted) OS=Capra hircus OX=9925 GN=CCDC105 PE=4 SV=1	0.187	Down	9.9678e-07	CCDC105	57.544	1.8	1	1	1	1.548	2.238	1.241	1.705	2.054	0.24	0.292	0.371	0.348	0.393	cytoplasm
A0A452FXP6	DDB1- and CUL4-associated factor 6 isoform X5(predicted) OS=Capra hircus OX=9925 GN=DCAF6 PE=4 SV=1	1.662	Up	0.0021373	DCAF6	94.491	3.9	3	3	3	0.89	0.85	0.583	0.831	0.758	1.678	1.295	1.069	1.075	1.383	nucleus	GO:0006355 regulation of transcription, DNA-templated; GO:0006357 regulation of transcription from RNA polymerase II promoter; GO:0006464 cellular protein modification process; GO:0006807 nitrogen compound metabolic process; GO:0008152 metabolic process; GO:0009889 regulation of biosynthetic process; GO:0009891 positive regulation of biosynthetic process; GO:0009893 positive regulation of metabol…	GO:0000151 ubiquitin ligase complex; GO:0005622 intracellular; GO:0005623 cell; GO:0005634 nucleus; GO:0005654 nucleoplasm; GO:0005737 cytoplasm; GO:0005829 cytosol; GO:0005912 adherens junction; GO:0005924 cell-substrate adherens junction; GO:0005925 focal adhesion; GO:0030054 cell junction; GO:0030055 cell-substrate junction; GO:0031461 cullin-RING ubiquitin ligase complex; GO:0031974 membrane-…	GO:0003712 transcription cofactor activity; GO:0003713 transcription coactivator activity; GO:0030374 ligand-dependent nuclear receptor transcription coactivator activity;	K11795	IQWD1, NRIP, ARCAP; nuclear receptor interaction protein
A0A452EEM5	Ceramide-1-phosphate transfer protein(predicted) OS=Capra hircus OX=9925 GN=CPTP PE=4 SV=1	1.583	Up	0.00053867	CPTP	24.544	21	4	5	4	0.716	0.839	0.884	0.818	0.779	1.621	1.31	1.04	1.18	1.239	nucleus	GO:0001817 regulation of cytokine production; GO:0001818 negative regulation of cytokine production; GO:0002791 regulation of peptide secretion; GO:0002792 negative regulation of peptide secretion; GO:0006629 lipid metabolic process; GO:0006643 membrane lipid metabolic process; GO:0006664 glycolipid metabolic process; GO:0006665 sphingolipid metabolic process; GO:0006687 glycosphingolipid metabol…	GO:0005622 intracellular; GO:0005623 cell; GO:0005737 cytoplasm; GO:0005829 cytosol; GO:0044424 intracellular part; GO:0044444 cytoplasmic part; GO:0044464 cell part;	GO:0005215 transporter activity; GO:0005319 lipid transporter activity; GO:0005488 binding; GO:0005543 phospholipid binding; GO:0005548 phospholipid transporter activity; GO:0008289 lipid binding; GO:0033218 amide binding; GO:0035620 ceramide transporter activity; GO:0043167 ion binding; GO:0043168 anion binding; GO:0046624 sphingolipid transporter activity; GO:0046625 sphingolipid binding; GO:00…				PF08718	Glycolipid transfer protein (GLTP)
A0A452E0C3	Heat shock protein family E (Hsp10) member 1(predicted) OS=Capra hircus OX=9925 GN=HSPE1 PE=4 SV=1	0.656	Down	0.0079045	HSPE1	10.8	76.2	9	21	9	1.397	1.515	1.02	1.124	1.22	0.972	0.713	0.601	0.799	1.033	mitochondria	GO:0006457 protein folding; GO:0006458 'de novo' protein folding; GO:0006919 activation of cysteine-type endopeptidase activity involved in apoptotic process; GO:0006950 response to stress; GO:0006986 response to unfolded protein; GO:0009893 positive regulation of metabolic process; GO:0009987 cellular process; GO:0010033 response to organic substance; GO:0010604 positive regulation of macromolec…	GO:0005622 intracellular; GO:0005623 cell; GO:0005737 cytoplasm; GO:0005739 mitochondrion; GO:0005759 mitochondrial matrix; GO:0031974 membrane-enclosed lumen; GO:0043226 organelle; GO:0043227 membrane-bounded organelle; GO:0043229 intracellular organelle; GO:0043231 intracellular membrane-bounded organelle; GO:0043233 organelle lumen; GO:0044422 organelle part; GO:0044424 intracellular part; GO:…	GO:0005488 binding; GO:0005515 protein binding; GO:0043167 ion binding; GO:0043169 cation binding; GO:0046872 metal ion binding; GO:0051082 unfolded protein binding; GO:0051087 chaperone binding;	K04078	groES, HSPE1; chaperonin GroES		PF00166	Chaperonin 10 Kd subunit
A0A452DZP2	Interferon alpha-C(predicted) OS=Capra hircus OX=9925 GN=LOC102174842 PE=4 SV=1	1.829	Up	0.00070396	LOC102174842	21.308	4.8	1	1	1	0.819	0.795	0.518	0.823	0.722	1.613	1.543	1.096	1.215	1.26	extracellular	GO:0001775 cell activation; GO:0001817 regulation of cytokine production; GO:0001818 negative regulation of cytokine production; GO:0001932 regulation of protein phosphorylation; GO:0001934 positive regulation of protein phosphorylation; GO:0002250 adaptive immune response; GO:0002252 immune effector process; GO:0002263 cell activation involved in immune response; GO:0002285 lymphocyte activation…	GO:0005576 extracellular region; GO:0005615 extracellular space; GO:0005622 intracellular; GO:0005623 cell; GO:0044421 extracellular region part; GO:0044464 cell part;	GO:0005102 receptor binding; GO:0005125 cytokine activity; GO:0005126 cytokine receptor binding; GO:0005132 type I interferon receptor binding; GO:0005488 binding; GO:0005515 protein binding; GO:0030545 receptor regulator activity; GO:0044877 macromolecular complex binding; GO:0048018 receptor agonist activity; GO:0098772 molecular function regulator;				PF00143	Interferon alpha/beta domain
A0A452DW92	Proteasome 26S subunit, non-ATPase 11(predicted) OS=Capra hircus OX=9925 GN=PSMD11 PE=4 SV=1	1.691	Up	0.00174268	PSMD11	46.114	33.4	13	20	13	0.826	0.804	0.628	0.846	0.717	1.613	1.471	0.922	1.176	1.281	cytoplasm	GO:0001775 cell activation; GO:0002252 immune effector process; GO:0002263 cell activation involved in immune response; GO:0002274 myeloid leukocyte activation; GO:0002275 myeloid cell activation involved in immune response; GO:0002283 neutrophil activation involved in immune response; GO:0002366 leukocyte activation involved in immune response; GO:0002376 immune system process; GO:0002443 leukoc…	GO:0000502 proteasome complex; GO:0005576 extracellular region; GO:0005622 intracellular; GO:0005623 cell; GO:0005634 nucleus; GO:0005654 nucleoplasm; GO:0005737 cytoplasm; GO:0005829 cytosol; GO:0005838 proteasome regulatory particle; GO:0008541 proteasome regulatory particle, lid subcomplex; GO:0012505 endomembrane system; GO:0022624 proteasome accessory complex; GO:0030141 secretory granule; G…	GO:0005198 structural molecule activity;	K03036	PSMD11, RPN6; 26S proteasome regulatory subunit N6	chx03050 Proteasome - Capra hircus (goat); chx05169 Epstein-Barr virus infection - Capra hircus (goat);	PF01399	PCI domain
A0A452G034	Sodium- and chloride-dependent taurine transporter(predicted) OS=Capra hircus OX=9925 GN=SLC6A6 PE=4 SV=1	0.481	Down	0.00035735	SLC6A6	69.749	2.7	1	1	1	1.402	1.399	1.53	1.126	1.637	0.667	0.691	0.956	0.615	0.484	plasma membrane	GO:0003333 amino acid transmembrane transport; GO:0006082 organic acid metabolic process; GO:0006520 cellular amino acid metabolic process; GO:0006807 nitrogen compound metabolic process; GO:0006810 transport; GO:0006811 ion transport; GO:0006812 cation transport; GO:0006814 sodium ion transport; GO:0006820 anion transport; GO:0006865 amino acid transport; GO:0008152 metabolic process; GO:0009987…	GO:0005623 cell; GO:0005886 plasma membrane; GO:0005887 integral component of plasma membrane; GO:0016020 membrane; GO:0016021 integral component of membrane; GO:0031224 intrinsic component of membrane; GO:0031226 intrinsic component of plasma membrane; GO:0044425 membrane part; GO:0044459 plasma membrane part; GO:0044464 cell part; GO:0071944 cell periphery;	GO:0005215 transporter activity; GO:0005342 organic acid transmembrane transporter activity; GO:0005343 organic acid:sodium symporter activity; GO:0005368 taurine transmembrane transporter activity; GO:0005369 taurine:sodium symporter activity; GO:0005488 binding; GO:0008324 cation transmembrane transporter activity; GO:0008509 anion transmembrane transporter activity; GO:0008514 organic anion tr…	K05039	SLC6A6S; solute carrier family 6 (neurotransmitter transporter, GABA) member 6/8/11/12/13
A0A452F3E6	Ubiquitin-like modifier-activating enzyme 6(predicted) OS=Capra hircus OX=9925 GN=UBA6 PE=4 SV=1	1.654	Up	1.71175e-05	UBA6	118.98	28.7	27	34	27	0.813	0.771	0.733	0.806	0.738	1.256	1.449	1.087	1.229	1.366	cytoplasm	GO:0003008 system process; GO:0006464 cellular protein modification process; GO:0006508 proteolysis; GO:0006511 ubiquitin-dependent protein catabolic process; GO:0006807 nitrogen compound metabolic process; GO:0006950 response to stress; GO:0006974 cellular response to DNA damage stimulus; GO:0007275 multicellular organism development; GO:0007399 nervous system development; GO:0007417 central ner…	GO:0005622 intracellular; GO:0005623 cell; GO:0005737 cytoplasm; GO:0005829 cytosol; GO:0044424 intracellular part; GO:0044444 cytoplasmic part; GO:0044464 cell part;	GO:0003824 catalytic activity; GO:0004839 ubiquitin activating enzyme activity; GO:0008641 small protein activating enzyme activity; GO:0016874 ligase activity; GO:0016877 ligase activity, forming carbon-sulfur bonds; GO:0019780 FAT10 activating enzyme activity;	K10699	UBE1L2, UBA6; ubiquitin-activating enzyme E1-like protein 2 [EC:6.2.1.45]	chx04120 Ubiquitin mediated proteolysis - Capra hircus (goat);	PF00899; PF10585; PF09358	ThiF family; Ubiquitin-activating enzyme active site ; Ubiquitin-activating enzyme e1 C-terminal domain
A0A452DZY0	calcium-binding tyrosine phosphorylation-regulated protein isoform X3(predicted) OS=Capra hircus OX=9925 GN=CABYR PE=4 SV=1	0.337	Down	2.1733e-07	CABYR	41.28	29.1	10	13	10	1.722	1.295	1.27	1.712	1.584	0.473	0.522	0.531	0.48	0.553	mitochondria	GO:0000003 reproduction; GO:0003006 developmental process involved in reproduction; GO:0003341 cilium movement; GO:0003351 epithelial cilium movement; GO:0006928 movement of cell or subcellular component; GO:0007017 microtubule-based process; GO:0007018 microtubule-based movement; GO:0007154 cell communication; GO:0007165 signal transduction; GO:0007276 gamete generation; GO:0007281 germ cell dev…	GO:0005622 intracellular; GO:0005623 cell; GO:0005634 nucleus; GO:0005737 cytoplasm; GO:0005829 cytosol; GO:0005856 cytoskeleton; GO:0005929 cilium; GO:0031514 motile cilium; GO:0035686 sperm fibrous sheath; GO:0036126 sperm flagellum; GO:0042995 cell projection; GO:0043226 organelle; GO:0043227 membrane-bounded organelle; GO:0043228 non-membrane-bounded organelle; GO:0043229 intracellular organe…	GO:0005488 binding; GO:0005509 calcium ion binding; GO:0005515 protein binding; GO:0017124 SH3 domain binding; GO:0019899 enzyme binding; GO:0019904 protein domain specific binding; GO:0043167 ion binding; GO:0043169 cation binding; GO:0046872 metal ion binding; GO:0046982 protein heterodimerization activity; GO:0046983 protein dimerization activity;				PF02197	Regulatory subunit of type II PKA R-subunit
A0A452G875	Family with sequence similarity 71 member B(predicted) OS=Capra hircus OX=9925 GN=FAM71B PE=4 SV=1	0.33	Down	2.1419e-05	FAM71B	62.326	15.7	9	12	9	1.826	1.145	1.436	1.817	1.323	0.583	0.58	0.366	0.516	0.449	nucleus		GO:0005622 intracellular; GO:0005623 cell; GO:0005634 nucleus; GO:0043226 organelle; GO:0043227 membrane-bounded organelle; GO:0043229 intracellular organelle; GO:0043231 intracellular membrane-bounded organelle; GO:0044424 intracellular part; GO:0044464 cell part;
A0A452EW53	Reticulocalbin 2(predicted) OS=Capra hircus OX=9925 GN=RCN2 PE=4 SV=1	2.07	Up	2.25e-05	RCN2	36.968	30.6	11	15	11	0.558	0.811	0.755	0.587	0.705	1.475	1.643	1.303	1.298	1.351	extracellular		GO:0005622 intracellular; GO:0005623 cell; GO:0005634 nucleus; GO:0005730 nucleolus; GO:0005737 cytoplasm; GO:0005783 endoplasmic reticulum; GO:0005788 endoplasmic reticulum lumen; GO:0012505 endomembrane system; GO:0031974 membrane-enclosed lumen; GO:0031981 nuclear lumen; GO:0043226 organelle; GO:0043227 membrane-bounded organelle; GO:0043228 non-membrane-bounded organelle; GO:0043229 intracell…	GO:0005488 binding; GO:0005509 calcium ion binding; GO:0043167 ion binding; GO:0043169 cation binding; GO:0046872 metal ion binding;				PF13202	EF hand
A0A452DNA3	Coiled-coil domain containing 136(predicted) OS=Capra hircus OX=9925 GN=CCDC136 PE=4 SV=1	0.414	Down	1.55887e-05	CCDC136	130.85	13.4	12	13	12	1.636	1.219	1.104	1.512	1.455	0.583	0.459	0.61	0.601	0.615	nucleus	GO:0000003 reproduction; GO:0001675 acrosome assembly; GO:0003006 developmental process involved in reproduction; GO:0006996 organelle organization; GO:0007276 gamete generation; GO:0007281 germ cell development; GO:0007283 spermatogenesis; GO:0007286 spermatid development; GO:0007338 single fertilization; GO:0009566 fertilization; GO:0009653 anatomical structure morphogenesis; GO:0009987 cellula…	GO:0001669 acrosomal vesicle; GO:0002080 acrosomal membrane; GO:0005622 intracellular; GO:0005623 cell; GO:0005737 cytoplasm; GO:0012505 endomembrane system; GO:0012506 vesicle membrane; GO:0016020 membrane; GO:0030141 secretory granule; GO:0030659 cytoplasmic vesicle membrane; GO:0030667 secretory granule membrane; GO:0031090 organelle membrane; GO:0031410 cytoplasmic vesicle; GO:0031982 vesicle…		K22808
A0A452E516	Coiled-coil domain-containing protein 58(predicted) OS=Capra hircus OX=9925 GN=CCDC58 PE=4 SV=1	0.496	Down	6.4086e-05	CCDC58	16.708	31.9	4	6	4	1.451	1.472	1.128	1.316	1.606	0.707	0.599	0.689	0.877	0.589	cytoplasm		GO:0005622 intracellular; GO:0005623 cell; GO:0005737 cytoplasm; GO:0005739 mitochondrion; GO:0043226 organelle; GO:0043227 membrane-bounded organelle; GO:0043229 intracellular organelle; GO:0043231 intracellular membrane-bounded organelle; GO:0044424 intracellular part; GO:0044444 cytoplasmic part; GO:0044464 cell part;
A0A452E6D4	Complement component 5(predicted) OS=Capra hircus OX=9925 GN=C5 PE=4 SV=1	0.591	Down	0.00054472	C5	188.67	3.4	5	6	5	1.202	1.267	1.461	1.238	1.332	0.593	0.756	1.044	0.738	0.708	extracellular	GO:0000187 activation of MAPK activity; GO:0001701 in utero embryonic development; GO:0001817 regulation of cytokine production; GO:0001819 positive regulation of cytokine production; GO:0001932 regulation of protein phosphorylation; GO:0001934 positive regulation of protein phosphorylation; GO:0002376 immune system process; GO:0002523 leukocyte migration involved in inflammatory response; GO:000…	GO:0005576 extracellular region; GO:0005579 membrane attack complex; GO:0005615 extracellular space; GO:0005623 cell; GO:0005886 plasma membrane; GO:0005887 integral component of plasma membrane; GO:0016020 membrane; GO:0016021 integral component of membrane; GO:0031224 intrinsic component of membrane; GO:0031226 intrinsic component of plasma membrane; GO:0032991 macromolecular complex; GO:004442…	GO:0001664 G-protein coupled receptor binding; GO:0005102 receptor binding; GO:0005125 cytokine activity; GO:0005126 cytokine receptor binding; GO:0005488 binding; GO:0005515 protein binding; GO:0008009 chemokine activity; GO:0030545 receptor regulator activity; GO:0031714 C5a anaphylatoxin chemotactic receptor binding; GO:0042379 chemokine receptor binding; GO:0048018 receptor agonist activity; …	K03994	C5; complement component 5	chx04080 Neuroactive ligand-receptor interaction - Capra hircus (goat); chx04610 Complement and coagulation cascades - Capra hircus (goat); chx05020 Prion diseases - Capra hircus (goat); chx05133 Pertussis - Capra hircus (goat); chx05150 Staphylococcus aureus infection - Capra hircus (goat); chx05168 Herpes simplex virus 1 infection - Capra hircus (goat); chx05322 Systemic lupus erythematosus - C…	PF01835; PF07703; PF01821; PF07678; PF07677; PF01759	MG2 domain; Alpha-2-macroglobulin family N-terminal region; Anaphylotoxin-like domain; A-macroglobulin complement component; A-macroglobulin receptor; UNC-6/NTR/C345C module
A0A452FCY2	Alpha-L-fucosidase(predicted) OS=Capra hircus OX=9925 GN=FUCA2 PE=4 SV=1	1.67	Up	0.042723	FUCA2	53.525	36.7	15	22	15	0.751	0.685	0.819	0.843	0.777	1.729	1.831	1.083	0.981	0.847	cytoplasm	GO:0001775 cell activation; GO:0002252 immune effector process; GO:0002263 cell activation involved in immune response; GO:0002274 myeloid leukocyte activation; GO:0002275 myeloid cell activation involved in immune response; GO:0002283 neutrophil activation involved in immune response; GO:0002366 leukocyte activation involved in immune response; GO:0002376 immune system process; GO:0002443 leukoc…	GO:0000323 lytic vacuole; GO:0005576 extracellular region; GO:0005615 extracellular space; GO:0005622 intracellular; GO:0005623 cell; GO:0005737 cytoplasm; GO:0005764 lysosome; GO:0005766 primary lysosome; GO:0005773 vacuole; GO:0005775 vacuolar lumen; GO:0005783 endoplasmic reticulum; GO:0005788 endoplasmic reticulum lumen; GO:0012505 endomembrane system; GO:0030141 secretory granule; GO:0031410…	GO:0003824 catalytic activity; GO:0004553 hydrolase activity, hydrolyzing O-glycosyl compounds; GO:0004560 alpha-L-fucosidase activity; GO:0015928 fucosidase activity; GO:0016787 hydrolase activity; GO:0016798 hydrolase activity, acting on glycosyl bonds;	K01206	FUCA; alpha-L-fucosidase [EC:3.2.1.51]	chx00511 Other glycan degradation - Capra hircus (goat);	PF01120	Alpha-L-fucosidase
A0A452EGF3	Carboxypeptidase Q(predicted) OS=Capra hircus OX=9925 GN=CPQ PE=4 SV=1	0.515	Down	7.7521e-08	CPQ	52.775	43.3	20	94	20	1.473	1.309	1.333	1.255	1.443	0.684	0.688	0.658	0.762	0.72	endoplasmic reticulum	GO:0006508 proteolysis; GO:0006518 peptide metabolic process; GO:0006575 cellular modified amino acid metabolic process; GO:0006590 thyroid hormone generation; GO:0006725 cellular aromatic compound metabolic process; GO:0006807 nitrogen compound metabolic process; GO:0006950 response to stress; GO:0008152 metabolic process; GO:0009056 catabolic process; GO:0009611 response to wounding; GO:0009888…	GO:0000323 lytic vacuole; GO:0005576 extracellular region; GO:0005615 extracellular space; GO:0005622 intracellular; GO:0005623 cell; GO:0005737 cytoplasm; GO:0005764 lysosome; GO:0005773 vacuole; GO:0005783 endoplasmic reticulum; GO:0005794 Golgi apparatus; GO:0012505 endomembrane system; GO:0043226 organelle; GO:0043227 membrane-bounded organelle; GO:0043229 intracellular organelle; GO:0043231 …	GO:0003824 catalytic activity; GO:0005488 binding; GO:0005515 protein binding; GO:0008233 peptidase activity; GO:0008235 metalloexopeptidase activity; GO:0008237 metallopeptidase activity; GO:0008238 exopeptidase activity; GO:0016787 hydrolase activity; GO:0016805 dipeptidase activity; GO:0042802 identical protein binding; GO:0042803 protein homodimerization activity; GO:0046983 protein dimerizat…	K01302	CPQ; carboxypeptidase Q [EC:3.4.17.-]
A0A452FJD1	L-2-hydroxyglutarate dehydrogenase, mitochondrial(predicted) OS=Capra hircus OX=9925 GN=L2HGDH PE=4 SV=1	0.64	Down	0.006704	L2HGDH	46.02	4.1	2	2	2	1.405	0.966	1	1.263	1.699	0.789	0.831	0.681	0.805	0.948	extracellular	GO:0006807 nitrogen compound metabolic process; GO:0008152 metabolic process; GO:0009987 cellular process; GO:0019538 protein metabolic process; GO:0043170 macromolecule metabolic process; GO:0044237 cellular metabolic process; GO:0044238 primary metabolic process; GO:0044260 cellular macromolecule metabolic process; GO:0044267 cellular protein metabolic process; GO:0055114 oxidation-reduction pr…	GO:0016020 membrane; GO:0016021 integral component of membrane; GO:0031224 intrinsic component of membrane; GO:0044425 membrane part;	GO:0003824 catalytic activity; GO:0016491 oxidoreductase activity; GO:0016614 oxidoreductase activity, acting on CH-OH group of donors; GO:0047545 2-hydroxyglutarate dehydrogenase activity;	K00109	L2HGDH; 2-hydroxyglutarate dehydrogenase [EC:1.1.99.2]	chx00650 Butanoate metabolism - Capra hircus (goat); chx01100 Metabolic pathways - Capra hircus (goat);	PF01266	FAD dependent oxidoreductase
A0A452DY02	Beta-2-microglobulin(predicted) OS=Capra hircus OX=9925 PE=4 SV=1	1.686	Up	0.042215	---	13.613	44.1	6	27	1	0.562	1.123	0.584	0.553	1.042	0.696	1.545	1.253	1.398	1.622	extracellular	GO:0000041 transition metal ion transport; GO:0001775 cell activation; GO:0001817 regulation of cytokine production; GO:0001819 positive regulation of cytokine production; GO:0001910 regulation of leukocyte mediated cytotoxicity; GO:0001912 positive regulation of leukocyte mediated cytotoxicity; GO:0001914 regulation of T cell mediated cytotoxicity; GO:0001916 positive regulation of T cell mediat…	GO:0000139 Golgi membrane; GO:0005576 extracellular region; GO:0005615 extracellular space; GO:0005622 intracellular; GO:0005623 cell; GO:0005737 cytoplasm; GO:0005768 endosome; GO:0005769 early endosome; GO:0005783 endoplasmic reticulum; GO:0005788 endoplasmic reticulum lumen; GO:0005794 Golgi apparatus; GO:0005798 Golgi-associated vesicle; GO:0005829 cytosol; GO:0005886 plasma membrane; GO:0009…	GO:0005488 binding; GO:0005515 protein binding; GO:0042802 identical protein binding;	K08055	B2M; beta-2-microglobulin	chx04612 Antigen processing and presentation - Capra hircus (goat); chx05163 Human cytomegalovirus infection - Capra hircus (goat); chx05166 Human T-cell leukemia virus 1 infection - Capra hircus (goat); chx05168 Herpes simplex virus 1 infection - Capra hircus (goat); chx05169 Epstein-Barr virus infection - Capra hircus (goat); chx05170 Human immunodeficiency virus 1 infection - Capra hircus (goa…	PF07654	Immunoglobulin C1-set domain
A0A452FPX9	Dynein heavy chain 12, axonemal(predicted) OS=Capra hircus OX=9925 GN=DNAH12 PE=4 SV=1	0.42	Down	0.0041572	DNAH12	349.59	1.5	5	5	3	1.822	0.995	1.525	1.95	1.08	0.619	0.61	0.7	0.624	0.542	cytoplasm	GO:0000226 microtubule cytoskeleton organization; GO:0001578 microtubule bundle formation; GO:0003341 cilium movement; GO:0006928 movement of cell or subcellular component; GO:0006996 organelle organization; GO:0007010 cytoskeleton organization; GO:0007017 microtubule-based process; GO:0007018 microtubule-based movement; GO:0009987 cellular process; GO:0016043 cellular component organization; GO:…	GO:0005622 intracellular; GO:0005623 cell; GO:0005737 cytoplasm; GO:0005856 cytoskeleton; GO:0005858 axonemal dynein complex; GO:0005875 microtubule associated complex; GO:0005929 cilium; GO:0005930 axoneme; GO:0015630 microtubule cytoskeleton; GO:0030286 dynein complex; GO:0032838 cell projection cytoplasm; GO:0032991 macromolecular complex; GO:0036156 inner dynein arm; GO:0042995 cell projectio…	GO:0003774 motor activity; GO:0003777 microtubule motor activity; GO:0003824 catalytic activity; GO:0005488 binding; GO:0005515 protein binding; GO:0008569 ATP-dependent microtubule motor activity, minus-end-directed; GO:0016462 pyrophosphatase activity; GO:0016787 hydrolase activity; GO:0016817 hydrolase activity, acting on acid anhydrides; GO:0016818 hydrolase activity, acting on acid anhydride…				PF12774; PF12775; PF12780; PF03028	Hydrolytic ATP binding site of dynein motor region D1; P-loop containing dynein motor region D3; P-loop containing dynein motor region D4; Dynein heavy chain and region D6 of dynein motor
A0A452DKW0	Putative serine protease(predicted) OS=Capra hircus OX=9925 PE=4 SV=1	0.392	Down	0.000102995	---	23.838	23.8	4	6	4	2.076	1.365	1.086	1.654	1.449	0.454	0.61	0.567	0.654	0.705	extracellular				K19012	LYVE1; lymphatic vessel endothelial hyaluronan receptor 1		PF00089	Trypsin
A0A452F1P8	hsc70-interacting protein isoform X1(predicted) OS=Capra hircus OX=9925 GN=ST13 PE=4 SV=1	1.554	Up	0.014919	ST13	41.932	34.8	13	36	7	0.794	0.815	0.783	0.85	0.821	1.782	1.331	1.041	1.089	1.07	nucleus	GO:0006457 protein folding; GO:0006458 'de novo' protein folding; GO:0009987 cellular process; GO:0016043 cellular component organization; GO:0022607 cellular component assembly; GO:0043933 macromolecular complex subunit organization; GO:0044085 cellular component biogenesis; GO:0048519 negative regulation of biological process; GO:0048523 negative regulation of cellular process; GO:0050789 regul…	GO:0005622 intracellular; GO:0005623 cell; GO:0005737 cytoplasm; GO:0005829 cytosol; GO:0032991 macromolecular complex; GO:0044424 intracellular part; GO:0044444 cytoplasmic part; GO:0044464 cell part;	GO:0000166 nucleotide binding; GO:0005488 binding; GO:0005515 protein binding; GO:0017076 purine nucleotide binding; GO:0019904 protein domain specific binding; GO:0030544 Hsp70 protein binding; GO:0030554 adenyl nucleotide binding; GO:0030674 protein binding, bridging; GO:0031072 heat shock protein binding; GO:0032552 deoxyribonucleotide binding; GO:0032554 purine deoxyribonucleotide binding; GO…	K09560	ST13; suppressor of tumorigenicity protein 13
A0A059U2V6	Beta-defensin OS=Capra hircus OX=9925 GN=LOC106502770 PE=2 SV=1	1.53	Up	0.010615	LOC106502770	10.593	32.6	6	16	6	0.731	0.959	0.611	0.759	0.988	1.441	1.43	0.987	1.374	0.963	extracellular	GO:0000003 reproduction; GO:0001906 cell killing; GO:0002376 immune system process; GO:0006950 response to stress; GO:0006952 defense response; GO:0006955 immune response; GO:0006959 humoral immune response; GO:0007155 cell adhesion; GO:0007160 cell-matrix adhesion; GO:0007276 gamete generation; GO:0007283 spermatogenesis; GO:0009605 response to external stimulus; GO:0009607 response to biotic st…	GO:0005576 extracellular region; GO:0005623 cell; GO:0009986 cell surface; GO:0044464 cell part;					PF13841	Beta defensin
A0A452EYB5	Protein FAM71E2 (Fragment)(predicted) OS=Capra hircus OX=9925 PE=4 SV=1	0.374	Down	3.0256e-07	---	56.445	5.2	4	5	4	1.553	1.34	1.646	1.513	1.575	0.617	0.47	0.671	0.551	0.54	nucleus
A0A452EUL4	Coiled-coil domain-containing protein 81(predicted) OS=Capra hircus OX=9925 GN=CCDC81 PE=4 SV=1	0.482	Down	2.0611e-05	CCDC81	76.121	2.4	2	2	2	1.654	1.311	1.29	1.597	1.21	0.693	0.566	0.774	0.641	0.727	cytoplasm		GO:0005622 intracellular; GO:0005623 cell; GO:0005813 centrosome; GO:0005815 microtubule organizing center; GO:0005856 cytoskeleton; GO:0015630 microtubule cytoskeleton; GO:0043226 organelle; GO:0043228 non-membrane-bounded organelle; GO:0043229 intracellular organelle; GO:0043232 intracellular non-membrane-bounded organelle; GO:0044422 organelle part; GO:0044424 intracellular part; GO:0044430 cy…
A0A452G617	Cytochrome c 2(predicted) OS=Capra hircus OX=9925 GN=LOC106501717 PE=4 SV=1	0.491	Down	3.7095e-05	LOC106501717	11.739	67.6	10	36	9	1.714	1.213	1.238	1.586	1.221	0.716	0.648	0.617	0.662	0.782	mitochondria	GO:0006091 generation of precursor metabolites and energy; GO:0006119 oxidative phosphorylation; GO:0006122 mitochondrial electron transport, ubiquinol to cytochrome c; GO:0006123 mitochondrial electron transport, cytochrome c to oxygen; GO:0006139 nucleobase-containing compound metabolic process; GO:0006163 purine nucleotide metabolic process; GO:0006725 cellular aromatic compound metabolic proc…	GO:0005622 intracellular; GO:0005623 cell; GO:0005737 cytoplasm; GO:0005739 mitochondrion; GO:0005740 mitochondrial envelope; GO:0005758 mitochondrial intermembrane space; GO:0031967 organelle envelope; GO:0031970 organelle envelope lumen; GO:0031974 membrane-enclosed lumen; GO:0031975 envelope; GO:0043226 organelle; GO:0043227 membrane-bounded organelle; GO:0043229 intracellular organelle; GO:00…	GO:0005488 binding; GO:0020037 heme binding; GO:0046906 tetrapyrrole binding; GO:0048037 cofactor binding; GO:0097159 organic cyclic compound binding; GO:1901363 heterocyclic compound binding;	K08738	CYC; cytochrome c	chx01524 Platinum drug resistance - Capra hircus (goat); chx04115 p53 signaling pathway - Capra hircus (goat); chx04210 Apoptosis - Capra hircus (goat); chx04215 Apoptosis - multiple species - Capra hircus (goat); chx04932 Non-alcoholic fatty liver disease (NAFLD) - Capra hircus (goat); chx05010 Alzheimer disease - Capra hircus (goat); chx05012 Parkinson disease - Capra hircus (goat); chx05014 Am…	PF00034	Cytochrome c
A0A452FVT7	E3 ubiquitin-protein ligase(predicted) OS=Capra hircus OX=9925 GN=WWP2 PE=4 SV=1	1.997	Up	5.5462e-05	WWP2	94.576	5.9	5	5	4	0.789	0.718	0.646	0.749	0.612	1.578	1.587	1.093	1.251	1.508	mitochondria	GO:0000122 negative regulation of transcription from RNA polymerase II promoter; GO:0000209 protein polyubiquitination; GO:0006139 nucleobase-containing compound metabolic process; GO:0006351 transcription, DNA-templated; GO:0006355 regulation of transcription, DNA-templated; GO:0006357 regulation of transcription from RNA polymerase II promoter; GO:0006366 transcription from RNA polymerase II pr…	GO:0000151 ubiquitin ligase complex; GO:0005622 intracellular; GO:0005623 cell; GO:0005634 nucleus; GO:0005737 cytoplasm; GO:0005829 cytosol; GO:0032991 macromolecular complex; GO:0043226 organelle; GO:0043227 membrane-bounded organelle; GO:0043229 intracellular organelle; GO:0043231 intracellular membrane-bounded organelle; GO:0044424 intracellular part; GO:0044444 cytoplasmic part; GO:0044464 c…	GO:0000988 transcription factor activity, protein binding; GO:0000989 transcription factor activity, transcription factor binding; GO:0001076 transcription factor activity, RNA polymerase II transcription factor binding; GO:0001085 RNA polymerase II transcription factor binding; GO:0001190 transcriptional activator activity, RNA polymerase II transcription factor binding; GO:0003824 catalytic act…	K05630	WWP2, AIP2; atrophin-1 interacting protein 2 (WW domain containing E3 ubiquitin protein ligase 2) [EC:2.3.2.26]	chx04120 Ubiquitin mediated proteolysis - Capra hircus (goat);	PF00397; PF00632	WW domain; HECT-domain (ubiquitin-transferase)
A0A452FE42	Serpin B6(predicted) OS=Capra hircus OX=9925 GN=LOC106503969 PE=4 SV=1	0.633	Down	0.040064	LOC106503969	42.549	27.8	12	27	2	1.548	1.346	0.831	1.419	1.264	1.269	0.585	0.838	0.886	0.479	cytoplasm	GO:0000003 reproduction; GO:0001775 cell activation; GO:0001817 regulation of cytokine production; GO:0001819 positive regulation of cytokine production; GO:0002252 immune effector process; GO:0002253 activation of immune response; GO:0002263 cell activation involved in immune response; GO:0002274 myeloid leukocyte activation; GO:0002275 myeloid cell activation involved in immune response; GO:000…	GO:0005576 extracellular region; GO:0005615 extracellular space; GO:0005622 intracellular; GO:0005623 cell; GO:0005737 cytoplasm; GO:0005829 cytosol; GO:0005886 plasma membrane; GO:0012505 endomembrane system; GO:0012506 vesicle membrane; GO:0016020 membrane; GO:0030141 secretory granule; GO:0030659 cytoplasmic vesicle membrane; GO:0030667 secretory granule membrane; GO:0031090 organelle membrane…	GO:0002020 protease binding; GO:0004857 enzyme inhibitor activity; GO:0004866 endopeptidase inhibitor activity; GO:0004867 serine-type endopeptidase inhibitor activity; GO:0005488 binding; GO:0005515 protein binding; GO:0019899 enzyme binding; GO:0030234 enzyme regulator activity; GO:0030414 peptidase inhibitor activity; GO:0061134 peptidase regulator activity; GO:0061135 endopeptidase regulator …	K13963	SERPINB; serpin B	chx05146 Amoebiasis - Capra hircus (goat);	PF00079	Serpin (serine protease inhibitor)
A0A452ENI4	Ropporin-1(predicted) OS=Capra hircus OX=9925 GN=ROPN1 PE=4 SV=1	0.538	Down	0.00012366	ROPN1	23.933	39.2	7	16	7	1.629	1.334	1.039	1.413	1.461	0.738	0.684	0.887	0.708	0.683	cytoskeleton	GO:0000003 reproduction; GO:0000910 cytokinesis; GO:0001932 regulation of protein phosphorylation; GO:0003006 developmental process involved in reproduction; GO:0006928 movement of cell or subcellular component; GO:0006996 organelle organization; GO:0007049 cell cycle; GO:0007154 cell communication; GO:0007155 cell adhesion; GO:0007165 signal transduction; GO:0007264 small GTPase mediated signal …	GO:0005622 intracellular; GO:0005623 cell; GO:0005737 cytoplasm; GO:0005829 cytosol; GO:0005929 cilium; GO:0031514 motile cilium; GO:0031982 vesicle; GO:0036126 sperm flagellum; GO:0042995 cell projection; GO:0043226 organelle; GO:0043227 membrane-bounded organelle; GO:0043229 intracellular organelle; GO:0044422 organelle part; GO:0044424 intracellular part; GO:0044441 ciliary part; GO:0044444 cy…	GO:0005198 structural molecule activity; GO:0005488 binding; GO:0005515 protein binding; GO:0030159 receptor signaling complex scaffold activity; GO:0032947 protein complex scaffold; GO:0042802 identical protein binding; GO:0042803 protein homodimerization activity; GO:0046982 protein heterodimerization activity; GO:0046983 protein dimerization activity;
A0A452DRX9	Sperm acrosome membrane-associated protein 1(predicted) OS=Capra hircus OX=9925 GN=SPACA1 PE=4 SV=1	0.339	Down	4.2833e-06	SPACA1	30.924	43.2	9	26	9	1.835	1.59	1.125	1.615	1.357	0.435	0.469	0.461	0.571	0.616	extracellular	GO:0000003 reproduction; GO:0001675 acrosome assembly; GO:0003006 developmental process involved in reproduction; GO:0006950 response to stress; GO:0006952 defense response; GO:0006996 organelle organization; GO:0007276 gamete generation; GO:0007281 germ cell development; GO:0007283 spermatogenesis; GO:0007286 spermatid development; GO:0008152 metabolic process; GO:0009056 catabolic process; GO:0…	GO:0001669 acrosomal vesicle; GO:0002080 acrosomal membrane; GO:0005576 extracellular region; GO:0005615 extracellular space; GO:0005622 intracellular; GO:0005623 cell; GO:0005737 cytoplasm; GO:0012505 endomembrane system; GO:0012506 vesicle membrane; GO:0016020 membrane; GO:0030141 secretory granule; GO:0030659 cytoplasmic vesicle membrane; GO:0030667 secretory granule membrane; GO:0031090 organ…	GO:0003796 lysozyme activity; GO:0003824 catalytic activity; GO:0004553 hydrolase activity, hydrolyzing O-glycosyl compounds; GO:0016787 hydrolase activity; GO:0016798 hydrolase activity, acting on glycosyl bonds; GO:0061783 peptidoglycan muralytic activity;
A0A452DLC3	Vesicle-associated membrane protein-associated protein A(predicted) OS=Capra hircus OX=9925 GN=VAPA PE=4 SV=1	0.51	Down	4.6256e-06	VAPA	27.814	34.9	9	15	8	1.551	1.441	1.178	1.353	1.368	0.802	0.676	0.595	0.686	0.755	cytoplasm	GO:0001775 cell activation; GO:0002252 immune effector process; GO:0002263 cell activation involved in immune response; GO:0002274 myeloid leukocyte activation; GO:0002275 myeloid cell activation involved in immune response; GO:0002283 neutrophil activation involved in immune response; GO:0002366 leukocyte activation involved in immune response; GO:0002376 immune system process; GO:0002443 leukoc…	GO:0000323 lytic vacuole; GO:0005622 intracellular; GO:0005623 cell; GO:0005634 nucleus; GO:0005635 nuclear envelope; GO:0005737 cytoplasm; GO:0005764 lysosome; GO:0005765 lysosomal membrane; GO:0005766 primary lysosome; GO:0005773 vacuole; GO:0005774 vacuolar membrane; GO:0005783 endoplasmic reticulum; GO:0005789 endoplasmic reticulum membrane; GO:0005856 cytoskeleton; GO:0005886 plasma membrane…	GO:0005488 binding; GO:0005515 protein binding; GO:0008017 microtubule binding; GO:0008092 cytoskeletal protein binding; GO:0015631 tubulin binding; GO:0019904 protein domain specific binding; GO:0033149 FFAT motif binding; GO:0042802 identical protein binding; GO:0046982 protein heterodimerization activity; GO:0046983 protein dimerization activity;	K06096	VAPA; vesicle-associated membrane protein-associated protein A	chx04979 Cholesterol metabolism - Capra hircus (goat);	PF00635	MSP (Major sperm protein) domain
A0A452G8R8	endophilin-B1 isoform X3(predicted) OS=Capra hircus OX=9925 GN=SH3GLB1 PE=4 SV=1	1.806	Up	5.552e-05	SH3GLB1	45.169	20.1	10	14	9	0.788	0.71	0.838	0.774	0.657	1.406	1.591	1.097	1.29	1.42	nucleus	GO:0001558 regulation of cell growth; GO:0006457 protein folding; GO:0006458 'de novo' protein folding; GO:0006629 lipid metabolic process; GO:0006644 phospholipid metabolic process; GO:0006650 glycerophospholipid metabolic process; GO:0006654 phosphatidic acid biosynthetic process; GO:0006793 phosphorus metabolic process; GO:0006796 phosphate-containing compound metabolic process; GO:0006810 tra…	GO:0000421 autophagosome membrane; GO:0005622 intracellular; GO:0005623 cell; GO:0005737 cytoplasm; GO:0005739 mitochondrion; GO:0005740 mitochondrial envelope; GO:0005768 endosome; GO:0005769 early endosome; GO:0005773 vacuole; GO:0005774 vacuolar membrane; GO:0005776 autophagosome; GO:0005783 endoplasmic reticulum; GO:0005829 cytosol; GO:0008021 synaptic vesicle; GO:0012505 endomembrane system;…	GO:0003824 catalytic activity; GO:0005488 binding; GO:0005504 fatty acid binding; GO:0005515 protein binding; GO:0008289 lipid binding; GO:0016740 transferase activity; GO:0016746 transferase activity, transferring acyl groups; GO:0016747 transferase activity, transferring acyl groups other than amino-acyl groups; GO:0031406 carboxylic acid binding; GO:0033293 monocarboxylic acid binding; GO:0036…	K11248	SH3GLB1; endophilin-B1	chx04140 Autophagy - animal - Capra hircus (goat); chx04144 Endocytosis - Capra hircus (goat);	PF03114	BAR domain
A0A452DU42	Histone H2A deubiquitinase MYSM1(predicted) OS=Capra hircus OX=9925 GN=MYSM1 PE=4 SV=1	0.511	Down	0.0169799	MYSM1	94.076	1.3	1	1	1	1.162	1.185	2.551	0.916	1.168	0.629	0.743	0.896	0.829	0.47	nucleus	GO:0006325 chromatin organization; GO:0006338 chromatin remodeling; GO:0006355 regulation of transcription, DNA-templated; GO:0006357 regulation of transcription from RNA polymerase II promoter; GO:0006464 cellular protein modification process; GO:0006508 proteolysis; GO:0006807 nitrogen compound metabolic process; GO:0006996 organelle organization; GO:0008152 metabolic process; GO:0009889 regula…	GO:0005622 intracellular; GO:0005623 cell; GO:0005634 nucleus; GO:0005654 nucleoplasm; GO:0005886 plasma membrane; GO:0016020 membrane; GO:0031974 membrane-enclosed lumen; GO:0031981 nuclear lumen; GO:0043226 organelle; GO:0043227 membrane-bounded organelle; GO:0043229 intracellular organelle; GO:0043231 intracellular membrane-bounded organelle; GO:0043233 organelle lumen; GO:0044422 organelle pa…	GO:0000981 RNA polymerase II transcription factor activity, sequence-specific DNA binding; GO:0003700 transcription factor activity, sequence-specific DNA binding; GO:0003712 transcription cofactor activity; GO:0003713 transcription coactivator activity; GO:0003824 catalytic activity; GO:0004843 thiol-dependent ubiquitin-specific protease activity; GO:0005488 binding; GO:0005515 protein binding; …	K11865	MYSM1; protein MYSM1		PF00249; PF04433	Myb-like DNA-binding domain; SWIRM domain
A0A452DRS8	Transmembrane protein ENSP00000340100-like protein(predicted) OS=Capra hircus OX=9925 GN=FAM205C PE=4 SV=1	0.316	Down	0.0002957	FAM205C	43.821	9.8	4	4	4	1.706	1.973	0.921	1.427	1.887	0.308	0.454	0.565	0.648	0.528	extracellular
A0A452FB63	UBX domain protein 11(predicted) OS=Capra hircus OX=9925 GN=UBXN11 PE=4 SV=1	0.64	Down	0.028341	UBXN11	53.09	17.8	7	8	7	1.28	1.359	0.856	1.025	1.735	0.785	0.864	0.732	0.787	0.837	nucleus	GO:0006508 proteolysis; GO:0006511 ubiquitin-dependent protein catabolic process; GO:0006807 nitrogen compound metabolic process; GO:0008152 metabolic process; GO:0009056 catabolic process; GO:0009057 macromolecule catabolic process; GO:0009987 cellular process; GO:0010498 proteasomal protein catabolic process; GO:0019538 protein metabolic process; GO:0019941 modification-dependent protein catabo…		GO:0005488 binding; GO:0005515 protein binding; GO:0032182 ubiquitin-like protein binding; GO:0043130 ubiquitin binding;				PF08059	SEP domain
A0A452EVP1	Apolipoprotein D(predicted) OS=Capra hircus OX=9925 GN=APOD PE=4 SV=1	0.657	Down	0.0029188	APOD	24.13	11.7	2	4	2	1.132	1.122	1.589	1.103	1.332	0.854	0.797	1.028	0.778	0.665	extracellular	GO:0000302 response to reactive oxygen species; GO:0001525 angiogenesis; GO:0001568 blood vessel development; GO:0001817 regulation of cytokine production; GO:0001818 negative regulation of cytokine production; GO:0001944 vasculature development; GO:0001952 regulation of cell-matrix adhesion; GO:0001953 negative regulation of cell-matrix adhesion; GO:0002682 regulation of immune system process; G…	GO:0005576 extracellular region; GO:0005615 extracellular space; GO:0005622 intracellular; GO:0005623 cell; GO:0005737 cytoplasm; GO:0005783 endoplasmic reticulum; GO:0005829 cytosol; GO:0005840 ribosome; GO:0012505 endomembrane system; GO:0022626 cytosolic ribosome; GO:0030425 dendrite; GO:0032991 macromolecular complex; GO:0036477 somatodendritic compartment; GO:0042995 cell projection; GO:0043…	GO:0005215 transporter activity; GO:0005319 lipid transporter activity; GO:0005488 binding; GO:0005496 steroid binding; GO:0008289 lipid binding; GO:0015485 cholesterol binding; GO:0032934 sterol binding; GO:0036094 small molecule binding; GO:0043178 alcohol binding; GO:0097159 organic cyclic compound binding;	K03098	APOD; apolipoprotein D and lipocalin family protein		PF00061	Lipocalin / cytosolic fatty-acid binding protein family
A0A452F2M2	T-complex protein 1 subunit theta(predicted) OS=Capra hircus OX=9925 GN=CCT8 PE=4 SV=1	1.741	Up	0.0028755	CCT8	59.637	59.1	37	121	37	0.776	0.798	0.64	0.82	0.725	1.828	1.302	0.904	1.113	1.398	cytoplasm	GO:0000003 reproduction; GO:0001775 cell activation; GO:0002252 immune effector process; GO:0002263 cell activation involved in immune response; GO:0002274 myeloid leukocyte activation; GO:0002275 myeloid cell activation involved in immune response; GO:0002283 neutrophil activation involved in immune response; GO:0002366 leukocyte activation involved in immune response; GO:0002376 immune system p…	GO:0000323 lytic vacuole; GO:0002199 zona pellucida receptor complex; GO:0005576 extracellular region; GO:0005622 intracellular; GO:0005623 cell; GO:0005634 nucleus; GO:0005654 nucleoplasm; GO:0005737 cytoplasm; GO:0005764 lysosome; GO:0005766 primary lysosome; GO:0005773 vacuole; GO:0005775 vacuolar lumen; GO:0005813 centrosome; GO:0005815 microtubule organizing center; GO:0005829 cytosol; GO:00…	GO:0003824 catalytic activity; GO:0005488 binding; GO:0005515 protein binding; GO:0016462 pyrophosphatase activity; GO:0016787 hydrolase activity; GO:0016817 hydrolase activity, acting on acid anhydrides; GO:0016818 hydrolase activity, acting on acid anhydrides, in phosphorus-containing anhydrides; GO:0016887 ATPase activity; GO:0017111 nucleoside-triphosphatase activity; GO:0042623 ATPase activi…	K09500	CCT8; T-complex protein 1 subunit theta
A0A452EU42	Runt-related transcription factor(predicted) OS=Capra hircus OX=9925 GN=RUNX2 PE=4 SV=1	0.37	Down	1.4042e-06	RUNX2	54.046	1.4	1	4	1	1.597	1.406	1.733	1.392	1.503	0.526	0.53	0.56	0.741	0.47	cytoplasm,nucleus	GO:0001501 skeletal system development; GO:0001503 ossification; GO:0001649 osteoblast differentiation; GO:0001775 cell activation; GO:0001958 endochondral ossification; GO:0002051 osteoblast fate commitment; GO:0002062 chondrocyte differentiation; GO:0002063 chondrocyte development; GO:0002076 osteoblast development; GO:0002376 immune system process; GO:0002520 immune system development; GO:0002…	GO:0000228 nuclear chromosome; GO:0000785 chromatin; GO:0000790 nuclear chromatin; GO:0005622 intracellular; GO:0005623 cell; GO:0005634 nucleus; GO:0005654 nucleoplasm; GO:0005667 transcription factor complex; GO:0005694 chromosome; GO:0005737 cytoplasm; GO:0005829 cytosol; GO:0031974 membrane-enclosed lumen; GO:0031981 nuclear lumen; GO:0032991 macromolecular complex; GO:0043226 organelle; GO:0…	GO:0000976 transcription regulatory region sequence-specific DNA binding; GO:0000977 RNA polymerase II regulatory region sequence-specific DNA binding; GO:0000978 RNA polymerase II core promoter proximal region sequence-specific DNA binding; GO:0000981 RNA polymerase II transcription factor activity, sequence-specific DNA binding; GO:0000982 transcription factor activity, RNA polymerase II core p…	K09278	RUNX2, AML3; runt-related transcription factor 2	chx04928 Parathyroid hormone synthesis, secretion and action - Capra hircus (goat); chx05202 Transcriptional misregulation in cancer - Capra hircus (goat);	PF00853	Runt domain
A0A452E387	Polypeptide N-acetylgalactosaminyltransferase 7(predicted) OS=Capra hircus OX=9925 GN=GALNT7 PE=4 SV=1	1.69	Up	0.0160986	GALNT7	75.534	4.3	3	3	3	0.727	0.804	0.931	0.677	0.786	0.816	1.284	2.03	1.417	1.086	endoplasmic reticulum				K00710	GALNT; polypeptide N-acetylgalactosaminyltransferase [EC:2.4.1.41]	chx00512 Mucin type O-glycan biosynthesis - Capra hircus (goat); chx01100 Metabolic pathways - Capra hircus (goat);	PF00652	Ricin-type beta-trefoil lectin domain
Q079S9	Endostatin-like protein (Fragment) OS=Capra hircus OX=9925 GN=CHE PE=2 SV=1	0.608	Down	0.029376	CHE	19.743	11.2	2	2	2	0.927	2.163	1.171	0.898	1.347	0.679	0.68	0.839	0.895	0.86	extracellular	GO:0000902 cell morphogenesis; GO:0000904 cell morphogenesis involved in differentiation; GO:0001525 angiogenesis; GO:0001568 blood vessel development; GO:0001885 endothelial cell development; GO:0001886 endothelial cell morphogenesis; GO:0001944 vasculature development; GO:0002064 epithelial cell development; GO:0003008 system process; GO:0003158 endothelium development; GO:0003382 epithelial ce…	GO:0005576 extracellular region; GO:0005581 collagen trimer; GO:0005604 basement membrane; GO:0005622 intracellular; GO:0005623 cell; GO:0005737 cytoplasm; GO:0005783 endoplasmic reticulum; GO:0005788 endoplasmic reticulum lumen; GO:0012505 endomembrane system; GO:0031012 extracellular matrix; GO:0031974 membrane-enclosed lumen; GO:0032991 macromolecular complex; GO:0043226 organelle; GO:0043227 …	GO:0005488 binding; GO:0005515 protein binding; GO:0042802 identical protein binding;	K06823	COL18A; collagen, type XVIII, alpha	chx04974 Protein digestion and absorption - Capra hircus (goat);	PF06482	Collagenase NC10 and Endostatin
A0A452ERW8	Dihydrolipoyllysine-residue succinyltransferase component of 2-oxoglutarate dehydrogenase complex, mitochondrial(predicted) OS=Capra hircus OX=9925 GN=DLST PE=4 SV=1	0.471	Down	0.022537	DLST	48.942	18.5	9	9	9	2.274	1.058	1.312	1.896	0.82	0.602	0.77	0.718	0.691	0.683	mitochondria	GO:0006082 organic acid metabolic process; GO:0006103 2-oxoglutarate metabolic process; GO:0006104 succinyl-CoA metabolic process; GO:0006139 nucleobase-containing compound metabolic process; GO:0006163 purine nucleotide metabolic process; GO:0006464 cellular protein modification process; GO:0006637 acyl-CoA metabolic process; GO:0006725 cellular aromatic compound metabolic process; GO:0006732 co…	GO:0005622 intracellular; GO:0005623 cell; GO:0005634 nucleus; GO:0005737 cytoplasm; GO:0005739 mitochondrion; GO:0032991 macromolecular complex; GO:0043226 organelle; GO:0043227 membrane-bounded organelle; GO:0043229 intracellular organelle; GO:0043231 intracellular membrane-bounded organelle; GO:0044424 intracellular part; GO:0044444 cytoplasmic part; GO:0044464 cell part; GO:0045239 tricarboxy…	GO:0003824 catalytic activity; GO:0004149 dihydrolipoyllysine-residue succinyltransferase activity; GO:0016417 S-acyltransferase activity; GO:0016740 transferase activity; GO:0016746 transferase activity, transferring acyl groups; GO:0016747 transferase activity, transferring acyl groups other than amino-acyl groups; GO:0016748 succinyltransferase activity; GO:0016751 S-succinyltransferase activi…	K00658	DLST, sucB; 2-oxoglutarate dehydrogenase E2 component (dihydrolipoamide succinyltransferase) [EC:2.3.1.61]	chx00020 Citrate cycle (TCA cycle) - Capra hircus (goat); chx00310 Lysine degradation - Capra hircus (goat); chx00380 Tryptophan metabolism - Capra hircus (goat); chx01100 Metabolic pathways - Capra hircus (goat); chx01200 Carbon metabolism - Capra hircus (goat);	PF00364; PF00198	Biotin-requiring enzyme; 2-oxoacid dehydrogenases acyltransferase (catalytic domain)
A0A452EPB5	Dynein intermediate chain 1, axonemal(predicted) OS=Capra hircus OX=9925 GN=DNAI1 PE=4 SV=1	0.598	Down	0.008677	DNAI1	79.726	12	7	7	7	1.633	1.14	0.775	1.377	1.278	0.957	0.717	0.627	0.682	0.725	nucleus	GO:0000226 microtubule cytoskeleton organization; GO:0001578 microtubule bundle formation; GO:0003341 cilium movement; GO:0003351 epithelial cilium movement; GO:0006928 movement of cell or subcellular component; GO:0006996 organelle organization; GO:0007010 cytoskeleton organization; GO:0007017 microtubule-based process; GO:0007018 microtubule-based movement; GO:0007154 cell communication; GO:000…	GO:0005622 intracellular; GO:0005623 cell; GO:0005737 cytoplasm; GO:0005813 centrosome; GO:0005815 microtubule organizing center; GO:0005856 cytoskeleton; GO:0005858 axonemal dynein complex; GO:0005875 microtubule associated complex; GO:0005929 cilium; GO:0005930 axoneme; GO:0015630 microtubule cytoskeleton; GO:0030286 dynein complex; GO:0032838 cell projection cytoplasm; GO:0032991 macromolecula…	GO:0003774 motor activity; GO:0003824 catalytic activity; GO:0005488 binding; GO:0005515 protein binding; GO:0016462 pyrophosphatase activity; GO:0016787 hydrolase activity; GO:0016817 hydrolase activity, acting on acid anhydrides; GO:0016818 hydrolase activity, acting on acid anhydrides, in phosphorus-containing anhydrides; GO:0017111 nucleoside-triphosphatase activity; GO:0045503 dynein light c…	K10409	DNAI1; dynein intermediate chain 1, axonemal	chx05016 Huntington disease - Capra hircus (goat);
A0A452FSI7	Sperm acrosomal protein FSA-ACR.1(predicted) OS=Capra hircus OX=9925 GN=ACRV1 PE=4 SV=1	0.218	Down	7.9105e-05	ACRV1	27.464	15.8	9	147	9	1.994	1.229	1.684	1.848	1.414	0.34	0.345	0.386	0.359	0.349	extracellular	GO:0007275 multicellular organism development; GO:0032501 multicellular organismal process; GO:0032502 developmental process; GO:0048856 anatomical structure development;	GO:0001669 acrosomal vesicle; GO:0005622 intracellular; GO:0005623 cell; GO:0005737 cytoplasm; GO:0012505 endomembrane system; GO:0030141 secretory granule; GO:0031410 cytoplasmic vesicle; GO:0031982 vesicle; GO:0043226 organelle; GO:0043227 membrane-bounded organelle; GO:0043229 intracellular organelle; GO:0044424 intracellular part; GO:0044444 cytoplasmic part; GO:0044464 cell part; GO:0097223 …
A0A452G517	Ubiquitin-conjugating enzyme E2 R1 (Fragment)(predicted) OS=Capra hircus OX=9925 GN=CDC34 PE=4 SV=1	1.873	Up	0.000161632	CDC34	26.478	17.9	4	4	4	0.714	0.648	0.656	0.647	0.915	1.22	1.643	1.1	1.336	1.405	cytoplasm				K02207	UBE2R, UBC3, CDC34; ubiquitin-conjugating enzyme E2 R [EC:2.3.2.23]	chx04120 Ubiquitin mediated proteolysis - Capra hircus (goat);	PF00179	Ubiquitin-conjugating enzyme
A0A452G158	CKLF-like MARVEL transmembrane domain-containing protein 2(predicted) OS=Capra hircus OX=9925 GN=CMTM2 PE=4 SV=1	0.426	Down	4.2483e-05	CMTM2	27.317	26.6	6	16	6	1.652	0.959	1.459	1.506	1.484	0.558	0.631	0.517	0.645	0.654	plasma membrane	GO:0006355 regulation of transcription, DNA-templated; GO:0009889 regulation of biosynthetic process; GO:0009890 negative regulation of biosynthetic process; GO:0009892 negative regulation of metabolic process; GO:0010468 regulation of gene expression; GO:0010556 regulation of macromolecule biosynthetic process; GO:0010558 negative regulation of macromolecule biosynthetic process; GO:0010565 regu…	GO:0005622 intracellular; GO:0005623 cell; GO:0005634 nucleus; GO:0005737 cytoplasm; GO:0016020 membrane; GO:0016021 integral component of membrane; GO:0031224 intrinsic component of membrane; GO:0043226 organelle; GO:0043227 membrane-bounded organelle; GO:0043229 intracellular organelle; GO:0043231 intracellular membrane-bounded organelle; GO:0044424 intracellular part; GO:0044425 membrane part;…	GO:0003712 transcription cofactor activity; GO:0003714 transcription corepressor activity;
A0A452EEE3	glycerophosphodiester phosphodiesterase domain-containing protein 4(predicted) OS=Capra hircus OX=9925 GN=LOC102183041 PE=4 SV=1	0.572	Down	0.0004834	LOC102183041	65.844	6.6	3	4	2	1.538	1.197	1.268	1.547	1.162	0.643	0.697	0.675	0.971	0.856	plasma membrane
A0A452FAM6	Solute carrier family 9 member B1(predicted) OS=Capra hircus OX=9925 GN=SLC9B1 PE=4 SV=1	0.46	Down	5.7495e-07	SLC9B1	55.359	4.1	2	2	2	1.464	1.302	1.305	1.52	1.55	0.691	0.74	0.562	0.665	0.624	plasma membrane
A0A452ENL1	Acrosin inhibitor 1 (Fragment)(predicted) OS=Capra hircus OX=9925 PE=4 SV=1	5.262	Up	0.023039	---	7.5613	90.5	8	27	8	0.327	0.377	0.322	0.401	0.259	0.951	1.683	4.054	0.398	1.785	extracellular	GO:0009892 negative regulation of metabolic process; GO:0010466 negative regulation of peptidase activity; GO:0010605 negative regulation of macromolecule metabolic process; GO:0010951 negative regulation of endopeptidase activity; GO:0019222 regulation of metabolic process; GO:0030162 regulation of proteolysis; GO:0031323 regulation of cellular metabolic process; GO:0031324 negative regulation o…	GO:0001669 acrosomal vesicle; GO:0005576 extracellular region; GO:0005615 extracellular space; GO:0005622 intracellular; GO:0005623 cell; GO:0005737 cytoplasm; GO:0012505 endomembrane system; GO:0030141 secretory granule; GO:0031410 cytoplasmic vesicle; GO:0031982 vesicle; GO:0043226 organelle; GO:0043227 membrane-bounded organelle; GO:0043229 intracellular organelle; GO:0044421 extracellular reg…	GO:0004857 enzyme inhibitor activity; GO:0004866 endopeptidase inhibitor activity; GO:0004867 serine-type endopeptidase inhibitor activity; GO:0030234 enzyme regulator activity; GO:0030414 peptidase inhibitor activity; GO:0061134 peptidase regulator activity; GO:0061135 endopeptidase regulator activity; GO:0098772 molecular function regulator;				PF00050	Kazal-type serine protease inhibitor domain
A0A452FWM0	Diphosphoinositol polyphosphate phosphohydrolase 1(predicted) OS=Capra hircus OX=9925 GN=NUDT3 PE=4 SV=1	1.689	Up	0.0089606	NUDT3	19.344	10.5	2	2	2	0.738	0.724	0.871	0.769	0.771	1.631	1.543	1.032	0.994	1.343	nucleus	GO:0006066 alcohol metabolic process; GO:0006139 nucleobase-containing compound metabolic process; GO:0006163 purine nucleotide metabolic process; GO:0006195 purine nucleotide catabolic process; GO:0006725 cellular aromatic compound metabolic process; GO:0006753 nucleoside phosphate metabolic process; GO:0006793 phosphorus metabolic process; GO:0006796 phosphate-containing compound metabolic proc…	GO:0005622 intracellular; GO:0005623 cell; GO:0005634 nucleus; GO:0005737 cytoplasm; GO:0005829 cytosol; GO:0043226 organelle; GO:0043227 membrane-bounded organelle; GO:0043229 intracellular organelle; GO:0043231 intracellular membrane-bounded organelle; GO:0044424 intracellular part; GO:0044444 cytoplasmic part; GO:0044464 cell part;	GO:0000287 magnesium ion binding; GO:0000298 endopolyphosphatase activity; GO:0003824 catalytic activity; GO:0004551 nucleotide diphosphatase activity; GO:0005488 binding; GO:0008486 diphosphoinositol-polyphosphate diphosphatase activity; GO:0016462 pyrophosphatase activity; GO:0016787 hydrolase activity; GO:0016817 hydrolase activity, acting on acid anhydrides; GO:0016818 hydrolase activity, act…	K07766	E3.6.1.52; diphosphoinositol-polyphosphate diphosphatase [EC:3.6.1.52]		PF00293	NUDIX domain
A0A452ERA9	TTC25 protein(predicted) OS=Capra hircus OX=9925 GN=TTC25 PE=4 SV=1	0.663	Down	0.0045786	TTC25	74.812	6.3	4	5	4	1.1	1.317	0.912	1.099	1.427	0.667	0.646	0.825	0.803	0.94	cytoplasm		GO:0005622 intracellular; GO:0005623 cell; GO:0005737 cytoplasm; GO:0044424 intracellular part; GO:0044464 cell part;
A0A452G1R9	Nucleobindin 2(predicted) OS=Capra hircus OX=9925 GN=NUCB2 PE=4 SV=1	1.634	Up	4.3766e-05	NUCB2	49.185	58.6	27	98	27	0.742	0.919	0.854	0.69	0.726	1.266	1.324	1.369	1.324	1.139	extracellular	GO:0002791 regulation of peptide secretion; GO:0002792 negative regulation of peptide secretion; GO:0006807 nitrogen compound metabolic process; GO:0006873 cellular ion homeostasis; GO:0006874 cellular calcium ion homeostasis; GO:0006875 cellular metal ion homeostasis; GO:0006950 response to stress; GO:0008152 metabolic process; GO:0009605 response to external stimulus; GO:0009719 response to end…	GO:0005576 extracellular region; GO:0005615 extracellular space; GO:0005622 intracellular; GO:0005623 cell; GO:0005634 nucleus; GO:0005635 nuclear envelope; GO:0005640 nuclear outer membrane; GO:0005737 cytoplasm; GO:0005783 endoplasmic reticulum; GO:0005793 endoplasmic reticulum-Golgi intermediate compartment; GO:0005794 Golgi apparatus; GO:0005795 Golgi stack; GO:0005797 Golgi medial cisterna; …	GO:0003676 nucleic acid binding; GO:0003677 DNA binding; GO:0005102 receptor binding; GO:0005126 cytokine receptor binding; GO:0005164 tumor necrosis factor receptor binding; GO:0005488 binding; GO:0005509 calcium ion binding; GO:0005515 protein binding; GO:0032813 tumor necrosis factor receptor superfamily binding; GO:0043167 ion binding; GO:0043169 cation binding; GO:0046872 metal ion binding; …	K20371	NUCB; nucleobindin		PF13499	EF-hand domain pair
A0A452EC09	Ubiquitinyl hydrolase 1(predicted) OS=Capra hircus OX=9925 GN=USP5 PE=4 SV=1	1.519	Up	0.0141818	USP5	93.324	23.7	15	20	15	0.915	0.751	0.739	0.932	0.763	1.712	1.474	1.009	0.931	1.103	cytoplasm	GO:0006464 cellular protein modification process; GO:0006508 proteolysis; GO:0006807 nitrogen compound metabolic process; GO:0008152 metabolic process; GO:0009893 positive regulation of metabolic process; GO:0009894 regulation of catabolic process; GO:0009896 positive regulation of catabolic process; GO:0009987 cellular process; GO:0010604 positive regulation of macromolecule metabolic process; G…	GO:0000323 lytic vacuole; GO:0005622 intracellular; GO:0005623 cell; GO:0005737 cytoplasm; GO:0005764 lysosome; GO:0005773 vacuole; GO:0005829 cytosol; GO:0043226 organelle; GO:0043227 membrane-bounded organelle; GO:0043229 intracellular organelle; GO:0043231 intracellular membrane-bounded organelle; GO:0044424 intracellular part; GO:0044444 cytoplasmic part; GO:0044464 cell part;	GO:0003824 catalytic activity; GO:0004175 endopeptidase activity; GO:0004197 cysteine-type endopeptidase activity; GO:0004843 thiol-dependent ubiquitin-specific protease activity; GO:0005488 binding; GO:0005515 protein binding; GO:0008233 peptidase activity; GO:0008234 cysteine-type peptidase activity; GO:0016787 hydrolase activity; GO:0019783 ubiquitin-like protein-specific protease activity; GO…	K11836	USP5_13, UBP14; ubiquitin carboxyl-terminal hydrolase 5/13 [EC:3.4.19.12]		PF02148; PF00627	Zn-finger in ubiquitin-hydrolases and other protein; UBA/TS-N domain
A0A452E8Q5	Thioredoxin domain containing 17(predicted) OS=Capra hircus OX=9925 GN=TXNDC17 PE=4 SV=1	1.602	Up	0.033782	TXNDC17	13.883	18.7	2	3	2	0.901	0.844	0.575	0.823	0.852	2.055	1.195	0.83	1.035	1.283	extracellular	GO:0007154 cell communication; GO:0007165 signal transduction; GO:0007166 cell surface receptor signaling pathway; GO:0008152 metabolic process; GO:0009636 response to toxic substance; GO:0009987 cellular process; GO:0010033 response to organic substance; GO:0019221 cytokine-mediated signaling pathway; GO:0023052 signaling; GO:0033209 tumor necrosis factor-mediated signaling pathway; GO:0034097 r…	GO:0005622 intracellular; GO:0005623 cell; GO:0005737 cytoplasm; GO:0005829 cytosol; GO:0044424 intracellular part; GO:0044444 cytoplasmic part; GO:0044464 cell part;	GO:0003824 catalytic activity; GO:0004601 peroxidase activity; GO:0015036 disulfide oxidoreductase activity; GO:0016209 antioxidant activity; GO:0016491 oxidoreductase activity; GO:0016651 oxidoreductase activity, acting on NAD(P)H; GO:0016667 oxidoreductase activity, acting on a sulfur group of donors; GO:0016668 oxidoreductase activity, acting on a sulfur group of donors, NAD(P) as acceptor; GO…
A0A452F9D6	Patched domain-containing protein 3 (Fragment)(predicted) OS=Capra hircus OX=9925 GN=LOC102172622 PE=4 SV=1	0.444	Down	7.0284e-07	LOC102172622	88.644	8.7	6	9	6	1.307	1.363	1.368	1.378	1.588	0.569	0.541	0.597	0.679	0.726	plasma membrane
A0A452E0J6	Sperm acrosome membrane-associated protein 4(predicted) OS=Capra hircus OX=9925 GN=SPACA4 PE=4 SV=1	0.6	Down	0.0038202	SPACA4	13.049	33.3	2	8	2	1.263	1.129	1.218	1.09	1.159	0.528	0.647	0.842	0.797	0.703	extracellular	GO:0006950 response to stress; GO:0006952 defense response; GO:0008152 metabolic process; GO:0009056 catabolic process; GO:0009605 response to external stimulus; GO:0009607 response to biotic stimulus; GO:0009617 response to bacterium; GO:0009987 cellular process; GO:0016998 cell wall macromolecule catabolic process; GO:0042742 defense response to bacterium; GO:0043170 macromolecule metabolic pro…	GO:0001669 acrosomal vesicle; GO:0005576 extracellular region; GO:0005615 extracellular space; GO:0005622 intracellular; GO:0005623 cell; GO:0005737 cytoplasm; GO:0005886 plasma membrane; GO:0012505 endomembrane system; GO:0016020 membrane; GO:0030141 secretory granule; GO:0031410 cytoplasmic vesicle; GO:0031982 vesicle; GO:0043226 organelle; GO:0043227 membrane-bounded organelle; GO:0043229 intr…	GO:0003796 lysozyme activity; GO:0003824 catalytic activity; GO:0004553 hydrolase activity, hydrolyzing O-glycosyl compounds; GO:0016787 hydrolase activity; GO:0016798 hydrolase activity, acting on glycosyl bonds; GO:0061783 peptidoglycan muralytic activity;	K19894	SPACA4, SAMP14; sperm acrosome membrane-associated protein 4		PF00021	u-PAR/Ly-6 domain
A0A452DQA1	Ubiquitin carboxyl-terminal hydrolase(predicted) OS=Capra hircus OX=9925 GN=UCHL5 PE=4 SV=1	1.652	Up	0.000118811	UCHL5	37.03	28.6	8	10	8	0.736	0.88	0.694	0.819	0.798	1.302	1.381	1.114	1.156	1.534	cytoplasm	GO:0006464 cellular protein modification process; GO:0006508 proteolysis; GO:0006807 nitrogen compound metabolic process; GO:0007275 multicellular organism development; GO:0007399 nervous system development; GO:0007417 central nervous system development; GO:0007420 brain development; GO:0008152 metabolic process; GO:0009653 anatomical structure morphogenesis; GO:0009887 animal organ morphogenesis…	GO:0000228 nuclear chromosome; GO:0000502 proteasome complex; GO:0000785 chromatin; GO:0000790 nuclear chromatin; GO:0005622 intracellular; GO:0005623 cell; GO:0005634 nucleus; GO:0005654 nucleoplasm; GO:0005694 chromosome; GO:0005737 cytoplasm; GO:0005739 mitochondrion; GO:0005829 cytosol; GO:0031011 Ino80 complex; GO:0031597 cytosolic proteasome complex; GO:0031974 membrane-enclosed lumen; GO:0…	GO:0003824 catalytic activity; GO:0004843 thiol-dependent ubiquitin-specific protease activity; GO:0004857 enzyme inhibitor activity; GO:0004866 endopeptidase inhibitor activity; GO:0005488 binding; GO:0008233 peptidase activity; GO:0008234 cysteine-type peptidase activity; GO:0016787 hydrolase activity; GO:0019783 ubiquitin-like protein-specific protease activity; GO:0030234 enzyme regulator act…	K05610	UCHL5, UCH37; ubiquitin carboxyl-terminal hydrolase L5 [EC:3.4.19.12]		PF01088	Ubiquitin carboxyl-terminal hydrolase, family 1
A0A452G2Z9	phosducin-like protein 2(predicted) OS=Capra hircus OX=9925 GN=PDCL2 PE=4 SV=1	1.674	Up	0.00028265	PDCL2	28.258	21.9	4	5	4	0.737	0.771	0.695	0.868	0.797	1.594	1.221	1.043	1.189	1.427	cytoplasm	GO:0006139 nucleobase-containing compound metabolic process; GO:0006725 cellular aromatic compound metabolic process; GO:0006807 nitrogen compound metabolic process; GO:0008152 metabolic process; GO:0008616 queuosine biosynthetic process; GO:0009058 biosynthetic process; GO:0009116 nucleoside metabolic process; GO:0009119 ribonucleoside metabolic process; GO:0009163 nucleoside biosynthetic proces…	GO:0005622 intracellular; GO:0005623 cell; GO:0005737 cytoplasm; GO:0044424 intracellular part; GO:0044464 cell part;					PF02114	Phosducin
A0A452EFK0	Semaphorin 5A(predicted) OS=Capra hircus OX=9925 GN=SEMA5A PE=4 SV=1	0.545	Down	0.048203	SEMA5A	120.3	2.8	3	3	3	1.925	0.962	0.927	2.111	0.958	0.747	0.845	0.719	0.816	0.622	extracellular	GO:0000902 cell morphogenesis; GO:0000904 cell morphogenesis involved in differentiation; GO:0001525 angiogenesis; GO:0001558 regulation of cell growth; GO:0001568 blood vessel development; GO:0001569 branching involved in blood vessel morphogenesis; GO:0001763 morphogenesis of a branching structure; GO:0001935 endothelial cell proliferation; GO:0001936 regulation of endothelial cell proliferatio…	GO:0005576 extracellular region; GO:0005615 extracellular space; GO:0005623 cell; GO:0005886 plasma membrane; GO:0016020 membrane; GO:0016021 integral component of membrane; GO:0031224 intrinsic component of membrane; GO:0044421 extracellular region part; GO:0044425 membrane part; GO:0044464 cell part; GO:0071944 cell periphery;	GO:0004888 transmembrane signaling receptor activity; GO:0005102 receptor binding; GO:0005488 binding; GO:0005515 protein binding; GO:0005539 glycosaminoglycan binding; GO:0008046 axon guidance receptor activity; GO:0030215 semaphorin receptor binding; GO:0035373 chondroitin sulfate proteoglycan binding; GO:0038023 signaling receptor activity; GO:0038191 neuropilin binding; GO:0043167 ion binding…	K06841	SEMA5; semaphorin 5	chx04360 Axon guidance - Capra hircus (goat);	PF00090	Thrombospondin type 1 domain
A0A452E4Y9	Glycerol kinase 2(predicted) OS=Capra hircus OX=9925 GN=GK2 PE=4 SV=1	0.475	Down	0.00050494	GK2	60.834	26.5	13	25	6	1.742	1.01	1.211	1.851	1.202	0.556	0.621	0.698	0.754	0.707	cytoplasm	GO:0005975 carbohydrate metabolic process; GO:0006066 alcohol metabolic process; GO:0006071 glycerol metabolic process; GO:0006072 glycerol-3-phosphate metabolic process; GO:0006629 lipid metabolic process; GO:0006638 neutral lipid metabolic process; GO:0006639 acylglycerol metabolic process; GO:0006641 triglyceride metabolic process; GO:0006793 phosphorus metabolic process; GO:0006796 phosphate-…	GO:0005622 intracellular; GO:0005623 cell; GO:0005737 cytoplasm; GO:0005739 mitochondrion; GO:0043226 organelle; GO:0043227 membrane-bounded organelle; GO:0043229 intracellular organelle; GO:0043231 intracellular membrane-bounded organelle; GO:0044424 intracellular part; GO:0044444 cytoplasmic part; GO:0044464 cell part;	GO:0003824 catalytic activity; GO:0004370 glycerol kinase activity; GO:0016301 kinase activity; GO:0016740 transferase activity; GO:0016772 transferase activity, transferring phosphorus-containing groups; GO:0016773 phosphotransferase activity, alcohol group as acceptor;	K00864	glpK, GK; glycerol kinase [EC:2.7.1.30]	chx00561 Glycerolipid metabolism - Capra hircus (goat); chx01100 Metabolic pathways - Capra hircus (goat); chx03320 PPAR signaling pathway - Capra hircus (goat);	PF00370; PF02782	FGGY family of carbohydrate kinases, N-terminal domain; FGGY family of carbohydrate kinases, C-terminal domain
A0A452EC76	Zonadhesin (gene/pseudogene)(predicted) OS=Capra hircus OX=9925 GN=ZAN PE=4 SV=1	0.348	Down	4.4174e-05	ZAN	272.75	18	43	71	43	1.726	1.091	1.771	1.82	1.128	0.424	0.492	0.606	0.512	0.585	plasma membrane	GO:0000003 reproduction; GO:0007155 cell adhesion; GO:0007338 single fertilization; GO:0007339 binding of sperm to zona pellucida; GO:0008037 cell recognition; GO:0009566 fertilization; GO:0009987 cellular process; GO:0009988 cell-cell recognition; GO:0019953 sexual reproduction; GO:0022414 reproductive process; GO:0022610 biological adhesion; GO:0035036 sperm-egg recognition; GO:0043900 regulati…	GO:0005623 cell; GO:0005886 plasma membrane; GO:0016020 membrane; GO:0044464 cell part; GO:0071944 cell periphery;	GO:0005488 binding; GO:0050840 extracellular matrix binding;				PF00629; PF01826; PF12714; PF08742; PF00008	MAM domain; Trypsin Inhibitor like cysteine rich domain; TILa domain; C8 domain; EGF-like domain
A0A452FBA5	ethanolaminephosphotransferase 1(predicted) OS=Capra hircus OX=9925 PE=4 SV=1	1.619	Up	0.0180951	---	43.679	2.9	1	1	1	0.804	0.822	0.631	1.028	0.693	1.149	2.063	1.176	1.032	1.02	plasma membrane	GO:0006629 lipid metabolic process; GO:0006644 phospholipid metabolic process; GO:0006646 phosphatidylethanolamine biosynthetic process; GO:0006650 glycerophospholipid metabolic process; GO:0006793 phosphorus metabolic process; GO:0006796 phosphate-containing compound metabolic process; GO:0008152 metabolic process; GO:0008610 lipid biosynthetic process; GO:0008654 phospholipid biosynthetic proce…	GO:0005622 intracellular; GO:0005623 cell; GO:0005737 cytoplasm; GO:0005783 endoplasmic reticulum; GO:0005789 endoplasmic reticulum membrane; GO:0012505 endomembrane system; GO:0016020 membrane; GO:0031984 organelle subcompartment; GO:0042175 nuclear outer membrane-endoplasmic reticulum membrane network; GO:0043226 organelle; GO:0043227 membrane-bounded organelle; GO:0043229 intracellular organel…	GO:0003824 catalytic activity; GO:0004307 ethanolaminephosphotransferase activity; GO:0016740 transferase activity; GO:0016772 transferase activity, transferring phosphorus-containing groups; GO:0016780 phosphotransferase activity, for other substituted phosphate groups; GO:0017169 CDP-alcohol phosphatidyltransferase activity;	K00993	EPT1; ethanolaminephosphotransferase [EC:2.7.8.1]	chx00440 Phosphonate and phosphinate metabolism - Capra hircus (goat); chx00564 Glycerophospholipid metabolism - Capra hircus (goat); chx00565 Ether lipid metabolism - Capra hircus (goat); chx01100 Metabolic pathways - Capra hircus (goat);
A0A452FMR6	Membrane primary amine oxidase(predicted) OS=Capra hircus OX=9925 GN=LOC102182869 PE=4 SV=1	0.614	Down	0.0142598	LOC102182869	82.359	29.8	22	68	8	1.312	1.861	0.976	0.945	1.389	0.61	0.691	0.851	0.988	0.84	cytoplasm	GO:0002376 immune system process; GO:0002523 leukocyte migration involved in inflammatory response; GO:0002673 regulation of acute inflammatory response; GO:0002675 positive regulation of acute inflammatory response; GO:0002682 regulation of immune system process; GO:0002684 positive regulation of immune system process; GO:0002685 regulation of leukocyte migration; GO:0002687 positive regulation …	GO:0005576 extracellular region; GO:0005615 extracellular space; GO:0005622 intracellular; GO:0005623 cell; GO:0005737 cytoplasm; GO:0005768 endosome; GO:0005769 early endosome; GO:0005783 endoplasmic reticulum; GO:0005794 Golgi apparatus; GO:0005886 plasma membrane; GO:0005902 microvillus; GO:0009986 cell surface; GO:0012505 endomembrane system; GO:0016020 membrane; GO:0016021 integral component…	GO:0003824 catalytic activity; GO:0005488 binding; GO:0005507 copper ion binding; GO:0005509 calcium ion binding; GO:0005515 protein binding; GO:0008131 primary amine oxidase activity; GO:0016491 oxidoreductase activity; GO:0016638 oxidoreductase activity, acting on the CH-NH2 group of donors; GO:0016641 oxidoreductase activity, acting on the CH-NH2 group of donors, oxygen as acceptor; GO:0042802…	K00276	AOC3, AOC2, tynA; primary-amine oxidase [EC:1.4.3.21]	chx00260 Glycine, serine and threonine metabolism - Capra hircus (goat); chx00350 Tyrosine metabolism - Capra hircus (goat); chx00360 Phenylalanine metabolism - Capra hircus (goat); chx00410 beta-Alanine metabolism - Capra hircus (goat); chx01100 Metabolic pathways - Capra hircus (goat);	PF02727; PF02728; PF01179	Copper amine oxidase, N2 domain; Copper amine oxidase, N3 domain; Copper amine oxidase, enzyme domain
A0A452F199	Protein phosphatase 4 regulatory subunit 1(predicted) OS=Capra hircus OX=9925 GN=PPP4R1 PE=4 SV=1	1.61	Up	2.1391e-06	PPP4R1	99.24	18.9	12	16	12	0.832	0.768	0.791	0.852	0.735	1.307	1.431	1.176	1.208	1.282	nucleus	GO:0006464 cellular protein modification process; GO:0006468 protein phosphorylation; GO:0006793 phosphorus metabolic process; GO:0006796 phosphate-containing compound metabolic process; GO:0006807 nitrogen compound metabolic process; GO:0007154 cell communication; GO:0007165 signal transduction; GO:0008152 metabolic process; GO:0009987 cellular process; GO:0010921 regulation of phosphatase activ…	GO:0005622 intracellular; GO:0005623 cell; GO:0008287 protein serine/threonine phosphatase complex; GO:0030289 protein phosphatase 4 complex; GO:0032991 macromolecular complex; GO:0044424 intracellular part; GO:0044464 cell part; GO:1902494 catalytic complex; GO:1903293 phosphatase complex;	GO:0019208 phosphatase regulator activity; GO:0019888 protein phosphatase regulator activity; GO:0030234 enzyme regulator activity; GO:0098772 molecular function regulator;	K15424	PPP4R1; serine/threonine-protein phosphatase 4 regulatory subunit 1
A0A452EA31	Dynein light chain roadblock-type 2 OS=Capra hircus OX=9925 GN=DYNLRB2 PE=4 SV=1	0.392	Down	2.8261e-07	DYNLRB2	10.903	50.5	3	3	3	1.593	1.48	1.364	1.55	1.573	0.604	0.472	0.583	0.661	0.644	cytoplasm	GO:0006810 transport; GO:0006928 movement of cell or subcellular component; GO:0006996 organelle organization; GO:0007017 microtubule-based process; GO:0007018 microtubule-based movement; GO:0009987 cellular process; GO:0010970 transport along microtubule; GO:0016043 cellular component organization; GO:0022607 cellular component assembly; GO:0030030 cell projection organization; GO:0030031 cell p…	GO:0005622 intracellular; GO:0005623 cell; GO:0005737 cytoplasm; GO:0005856 cytoskeleton; GO:0005858 axonemal dynein complex; GO:0005868 cytoplasmic dynein complex; GO:0005875 microtubule associated complex; GO:0005929 cilium; GO:0005930 axoneme; GO:0015630 microtubule cytoskeleton; GO:0030286 dynein complex; GO:0032838 cell projection cytoplasm; GO:0032991 macromolecular complex; GO:0036157 oute…	GO:0003774 motor activity; GO:0003777 microtubule motor activity; GO:0003824 catalytic activity; GO:0005488 binding; GO:0005515 protein binding; GO:0016462 pyrophosphatase activity; GO:0016787 hydrolase activity; GO:0016817 hydrolase activity, acting on acid anhydrides; GO:0016818 hydrolase activity, acting on acid anhydrides, in phosphorus-containing anhydrides; GO:0017111 nucleoside-triphosphat…	K10419	DYNLRB, DNCL2; dynein light chain roadblock-type		PF03259	Roadblock/LC7 domain
A0A452E3S6	Interstitial collagenase(predicted) OS=Capra hircus OX=9925 GN=MMP1 PE=4 SV=1	0.358	Down	0.025537	MMP1	53.198	7.1	3	3	3	2.475	0.746	0.814	2.834	0.806	0.807	0.568	0.496	0.455	0.418	extracellular	GO:0002376 immune system process; GO:0006508 proteolysis; GO:0006807 nitrogen compound metabolic process; GO:0006928 movement of cell or subcellular component; GO:0007154 cell communication; GO:0007165 signal transduction; GO:0007166 cell surface receptor signaling pathway; GO:0008152 metabolic process; GO:0009056 catabolic process; GO:0009987 cellular process; GO:0010033 response to organic subs…	GO:0005576 extracellular region; GO:0005615 extracellular space; GO:0005622 intracellular; GO:0005623 cell; GO:0005737 cytoplasm; GO:0044421 extracellular region part; GO:0044424 intracellular part; GO:0044464 cell part;	GO:0003824 catalytic activity; GO:0004175 endopeptidase activity; GO:0004222 metalloendopeptidase activity; GO:0004252 serine-type endopeptidase activity; GO:0005488 binding; GO:0008233 peptidase activity; GO:0008236 serine-type peptidase activity; GO:0008237 metallopeptidase activity; GO:0008270 zinc ion binding; GO:0016787 hydrolase activity; GO:0017171 serine hydrolase activity; GO:0043167 ion…	K01388	MMP1; matrix metalloproteinase-1 (interstitial collagenase) [EC:3.4.24.7]	chx03320 PPAR signaling pathway - Capra hircus (goat); chx04657 IL-17 signaling pathway - Capra hircus (goat); chx04926 Relaxin signaling pathway - Capra hircus (goat); chx05200 Pathways in cancer - Capra hircus (goat); chx05219 Bladder cancer - Capra hircus (goat); chx05323 Rheumatoid arthritis - Capra hircus (goat);	PF01471; PF00413	Putative peptidoglycan binding domain; Matrixin
A0A452ETA7	Clathrin light chain(predicted) OS=Capra hircus OX=9925 GN=CLTA PE=4 SV=1	2.333	Up	0.0105776	CLTA	23.322	23.9	6	7	6	0.643	0.614	0.531	0.708	0.55	1.186	2.4	1.071	0.926	1.522	cytoplasm	GO:0002376 immune system process; GO:0002478 antigen processing and presentation of exogenous peptide antigen; GO:0002495 antigen processing and presentation of peptide antigen via MHC class II; GO:0002504 antigen processing and presentation of peptide or polysaccharide antigen via MHC class II; GO:0006807 nitrogen compound metabolic process; GO:0006810 transport; GO:0006897 endocytosis; GO:00068…	GO:0000139 Golgi membrane; GO:0000323 lytic vacuole; GO:0005622 intracellular; GO:0005623 cell; GO:0005737 cytoplasm; GO:0005764 lysosome; GO:0005765 lysosomal membrane; GO:0005768 endosome; GO:0005773 vacuole; GO:0005774 vacuolar membrane; GO:0005794 Golgi apparatus; GO:0005802 trans-Golgi network; GO:0005829 cytosol; GO:0005886 plasma membrane; GO:0005905 clathrin-coated pit; GO:0005938 cell co…	GO:0005198 structural molecule activity; GO:0005488 binding; GO:0005515 protein binding; GO:0019899 enzyme binding; GO:0030276 clathrin binding; GO:0032050 clathrin heavy chain binding; GO:0033218 amide binding; GO:0042277 peptide binding; GO:0044877 macromolecular complex binding; GO:0051020 GTPase binding;
A0A452E1R9	Peroxiredoxin 1(predicted) OS=Capra hircus OX=9925 GN=PRDX1 PE=4 SV=1	0.609	Down	0.047038	PRDX1	22.209	31.2	7	16	5	1.631	0.942	0.894	1.907	1.042	1.311	0.614	0.722	0.633	0.63	cytoplasm	GO:0000302 response to reactive oxygen species; GO:0000303 response to superoxide; GO:0000305 response to oxygen radical; GO:0001775 cell activation; GO:0001906 cell killing; GO:0001909 leukocyte mediated cytotoxicity; GO:0001932 regulation of protein phosphorylation; GO:0002228 natural killer cell mediated immunity; GO:0002252 immune effector process; GO:0002262 myeloid cell homeostasis; GO:0002…	GO:0000228 nuclear chromosome; GO:0000785 chromatin; GO:0000790 nuclear chromatin; GO:0000791 euchromatin; GO:0005622 intracellular; GO:0005623 cell; GO:0005634 nucleus; GO:0005694 chromosome; GO:0005719 nuclear euchromatin; GO:0005730 nucleolus; GO:0005737 cytoplasm; GO:0005739 mitochondrion; GO:0005759 mitochondrial matrix; GO:0005777 peroxisome; GO:0005782 peroxisomal matrix; GO:0005829 cytoso…	GO:0003824 catalytic activity; GO:0004601 peroxidase activity; GO:0005488 binding; GO:0005515 protein binding; GO:0008379 thioredoxin peroxidase activity; GO:0016209 antioxidant activity; GO:0016491 oxidoreductase activity; GO:0016684 oxidoreductase activity, acting on peroxide as acceptor; GO:0020037 heme binding; GO:0042802 identical protein binding; GO:0042803 protein homodimerization activity…	K13279	PRDX1; peroxiredoxin 1 [EC:1.11.1.15]	chx04146 Peroxisome - Capra hircus (goat); chx05146 Amoebiasis - Capra hircus (goat);	PF00578; PF10417	AhpC/TSA family; C-terminal domain of 1-Cys peroxiredoxin
A0A452F7S9	Tubulin alpha-3 chain(predicted) OS=Capra hircus OX=9925 GN=LOC102173837 PE=4 SV=1	0.451	Down	0.00072086	LOC102173837	51.923	48.9	20	61	3	1.913	1.004	1.311	1.695	1.132	0.487	0.564	0.794	0.654	0.685	cytoplasm,nucleus				K07374	TUBA; tubulin alpha	chx04145 Phagosome - Capra hircus (goat); chx04210 Apoptosis - Capra hircus (goat); chx04530 Tight junction - Capra hircus (goat); chx04540 Gap junction - Capra hircus (goat);	PF00091; PF03953	Tubulin/FtsZ family, GTPase domain; Tubulin C-terminal domain
A0A452FA17	Hippocalcin like 1(predicted) OS=Capra hircus OX=9925 GN=HPCAL1 PE=4 SV=1	0.602	Down	0.040762	HPCAL1	22.285	4.1	1	2	1	1.284	1.649	0.984	0.995	1.607	0.577	0.484	0.89	1.465	0.508	cytoplasm							PF13833; PF13499	EF-hand domain pair; EF-hand domain pair
A0A452DNE8	Tubulin polymerization-promoting protein family member 2(predicted) OS=Capra hircus OX=9925 GN=TPPP2 PE=4 SV=1	1.521	Up	0.026722	TPPP2	18.503	80.1	18	72	18	0.814	0.917	0.619	0.765	0.987	1.672	1.453	0.823	1.042	1.248	cytoplasm		GO:0005622 intracellular; GO:0005623 cell; GO:0005737 cytoplasm; GO:0005829 cytosol; GO:0044424 intracellular part; GO:0044444 cytoplasmic part; GO:0044464 cell part;	GO:0005488 binding; GO:0005515 protein binding; GO:0008092 cytoskeletal protein binding; GO:0015631 tubulin binding;				PF05517	p25-alpha
A0A452F2A8	Serine racemase(predicted) OS=Capra hircus OX=9925 GN=SRR PE=4 SV=1	2.513	Up	0.0029448	SRR	35.967	12.6	3	3	3	0.677	0.6	0.439	0.712	0.499	1.054	2.293	0.845	1.255	1.908	cytoplasm	GO:0002237 response to molecule of bacterial origin; GO:0006082 organic acid metabolic process; GO:0006090 pyruvate metabolic process; GO:0006520 cellular amino acid metabolic process; GO:0006563 L-serine metabolic process; GO:0006564 L-serine biosynthetic process; GO:0006807 nitrogen compound metabolic process; GO:0007275 multicellular organism development; GO:0007399 nervous system development;…	GO:0005622 intracellular; GO:0005623 cell; GO:0005737 cytoplasm; GO:0005829 cytosol; GO:0005886 plasma membrane; GO:0016020 membrane; GO:0036477 somatodendritic compartment; GO:0043025 neuronal cell body; GO:0044297 cell body; GO:0044424 intracellular part; GO:0044444 cytoplasmic part; GO:0044464 cell part; GO:0045177 apical part of cell; GO:0071944 cell periphery; GO:0097458 neuron part;	GO:0000166 nucleotide binding; GO:0000287 magnesium ion binding; GO:0003824 catalytic activity; GO:0003941 L-serine ammonia-lyase activity; GO:0005488 binding; GO:0005509 calcium ion binding; GO:0005515 protein binding; GO:0005524 ATP binding; GO:0008144 drug binding; GO:0008721 D-serine ammonia-lyase activity; GO:0016594 glycine binding; GO:0016597 amino acid binding; GO:0016829 lyase activity; …	K12235	SRR; serine racemase [EC:5.1.1.18]	chx00260 Glycine, serine and threonine metabolism - Capra hircus (goat); chx01100 Metabolic pathways - Capra hircus (goat);
A0A452F2V0	Signal peptide, CUB domain and EGF like domain containing 1(predicted) OS=Capra hircus OX=9925 GN=SCUBE1 PE=4 SV=1	0.534	Down	0.0021804	SCUBE1	107.6	7.2	5	6	5	1.725	1.111	1.218	1.623	1.285	0.479	0.698	0.882	0.926	0.73	extracellular							PF12947; PF12662; PF07645; PF00431	EGF domain; Complement Clr-like EGF-like; Calcium-binding EGF domain; CUB domain
A0A452DSU1	Programmed cell death protein 5(predicted) OS=Capra hircus OX=9925 GN=PDCD5 PE=4 SV=1	1.532	Up	0.048025	PDCD5	14.226	34.4	4	7	4	0.827	0.905	0.61	0.978	0.837	2.096	1.142	0.873	1.04	1.217	cytoplasm	GO:0008219 cell death; GO:0009987 cellular process; GO:0012501 programmed cell death;	GO:0005622 intracellular; GO:0005623 cell; GO:0005634 nucleus; GO:0005737 cytoplasm; GO:0005829 cytosol; GO:0043226 organelle; GO:0043227 membrane-bounded organelle; GO:0043229 intracellular organelle; GO:0043231 intracellular membrane-bounded organelle; GO:0044424 intracellular part; GO:0044444 cytoplasmic part; GO:0044464 cell part;		K06875	PDCD5, TFAR19; programmed cell death protein 5
A0A452F825	Tubulin-specific chaperone E(predicted) OS=Capra hircus OX=9925 GN=TBCE PE=4 SV=1	1.644	Up	1.62639e-05	TBCE	59.266	9.1	4	4	4	0.692	0.847	0.861	0.747	0.814	1.244	1.213	1.466	1.287	1.301	cytoplasm	GO:0000226 microtubule cytoskeleton organization; GO:0000278 mitotic cell cycle; GO:0000902 cell morphogenesis; GO:0000904 cell morphogenesis involved in differentiation; GO:0003008 system process; GO:0003012 muscle system process; GO:0006457 protein folding; GO:0006996 organelle organization; GO:0007010 cytoskeleton organization; GO:0007017 microtubule-based process; GO:0007021 tubulin complex a…	GO:0005622 intracellular; GO:0005623 cell; GO:0005737 cytoplasm; GO:0005829 cytosol; GO:0005856 cytoskeleton; GO:0005874 microtubule; GO:0015630 microtubule cytoskeleton; GO:0043226 organelle; GO:0043228 non-membrane-bounded organelle; GO:0043229 intracellular organelle; GO:0043232 intracellular non-membrane-bounded organelle; GO:0044422 organelle part; GO:0044424 intracellular part; GO:0044430 c…	GO:0005488 binding; GO:0005515 protein binding; GO:0051082 unfolded protein binding; GO:0051087 chaperone binding;	K21768	TBCE; tubulin-specific chaperone E		PF01302	CAP-Gly domain
A0A452FJF9	Serotransferrin(predicted) OS=Capra hircus OX=9925 GN=TF PE=4 SV=1	0.608	Down	0.036099	TF	76.951	68.1	55	57	28	1.309	0.927	2.051	1.249	0.929	0.511	0.763	1.13	0.803	0.721	extracellular	GO:0000041 transition metal ion transport; GO:0000165 MAPK cascade; GO:0000187 activation of MAPK activity; GO:0001932 regulation of protein phosphorylation; GO:0001934 positive regulation of protein phosphorylation; GO:0002376 immune system process; GO:0002520 immune system development; GO:0002521 leukocyte differentiation; GO:0002573 myeloid leukocyte differentiation; GO:0002576 platelet degran…	GO:0005576 extracellular region; GO:0005604 basement membrane; GO:0005615 extracellular space; GO:0005622 intracellular; GO:0005623 cell; GO:0005737 cytoplasm; GO:0005768 endosome; GO:0005769 early endosome; GO:0005770 late endosome; GO:0005783 endoplasmic reticulum; GO:0005788 endoplasmic reticulum lumen; GO:0005886 plasma membrane; GO:0005905 clathrin-coated pit; GO:0009897 external side of pla…	GO:0005102 receptor binding; GO:0005488 binding; GO:0005506 iron ion binding; GO:0005515 protein binding; GO:0008198 ferrous iron binding; GO:0008199 ferric iron binding; GO:0016530 metallochaperone activity; GO:0034986 iron chaperone activity; GO:0043167 ion binding; GO:0043169 cation binding; GO:0046872 metal ion binding; GO:0046914 transition metal ion binding; GO:1990459 transferrin receptor …	K14736	TF; transferrin	chx04066 HIF-1 signaling pathway - Capra hircus (goat); chx04216 Ferroptosis - Capra hircus (goat); chx04978 Mineral absorption - Capra hircus (goat);	PF00405	Transferrin
A0A452ETE8	T-complex protein 1 subunit zeta(predicted) OS=Capra hircus OX=9925 GN=CCT6A PE=4 SV=1	1.763	Up	0.00030237	CCT6A	57.941	50.7	25	60	12	0.743	0.766	0.636	0.775	0.734	1.596	1.336	0.977	1.142	1.391	cytoplasm				K09498	CCT6; T-complex protein 1 subunit zeta
A0A452EK10	Interleukin 4 induced 1(predicted) OS=Capra hircus OX=9925 GN=IL4I1 PE=4 SV=1	0.588	Down	0.022382	IL4I1	62.235	51.2	29	64	29	1.617	0.949	1.462	1.576	0.862	0.453	0.758	0.736	0.896	0.956	plasma membrane	GO:0006082 organic acid metabolic process; GO:0006520 cellular amino acid metabolic process; GO:0006558 L-phenylalanine metabolic process; GO:0006559 L-phenylalanine catabolic process; GO:0006725 cellular aromatic compound metabolic process; GO:0006807 nitrogen compound metabolic process; GO:0008152 metabolic process; GO:0009056 catabolic process; GO:0009063 cellular amino acid catabolic process;…	GO:0000323 lytic vacuole; GO:0005576 extracellular region; GO:0005622 intracellular; GO:0005623 cell; GO:0005737 cytoplasm; GO:0005764 lysosome; GO:0005773 vacuole; GO:0043226 organelle; GO:0043227 membrane-bounded organelle; GO:0043229 intracellular organelle; GO:0043231 intracellular membrane-bounded organelle; GO:0044424 intracellular part; GO:0044444 cytoplasmic part; GO:0044464 cell part;	GO:0001716 L-amino-acid oxidase activity; GO:0003824 catalytic activity; GO:0016491 oxidoreductase activity; GO:0016638 oxidoreductase activity, acting on the CH-NH2 group of donors; GO:0016641 oxidoreductase activity, acting on the CH-NH2 group of donors, oxygen as acceptor;	K03334	IL4I1; L-amino-acid oxidase [EC:1.4.3.2]	chx00250 Alanine, aspartate and glutamate metabolism - Capra hircus (goat); chx00270 Cysteine and methionine metabolism - Capra hircus (goat); chx00280 Valine, leucine and isoleucine degradation - Capra hircus (goat); chx00350 Tyrosine metabolism - Capra hircus (goat); chx00360 Phenylalanine metabolism - Capra hircus (goat); chx00380 Tryptophan metabolism - Capra hircus (goat); chx00400 Phenylala…	PF01593	Flavin containing amine oxidoreductase
A0A452F7K3	Dynein light chain(predicted) OS=Capra hircus OX=9925 GN=DNAL4 PE=4 SV=1	0.497	Down	0.00114336	DNAL4	10.615	11	1	1	1	1.482	1.243	0.938	1.511	1.754	0.687	0.637	0.498	0.836	0.787	extracellular				K10412	DNAL4; dynein light chain 4, axonemal	chx05016 Huntington disease - Capra hircus (goat);	PF01221	Dynein light chain type 1
A0A452FJG5	Polycystic kidney disease 2-like 2(predicted) OS=Capra hircus OX=9925 GN=PKD2L2 PE=4 SV=1	0.489	Down	0.00042064	PKD2L2	71.09	18.5	11	13	11	1.602	0.919	1.623	1.611	1.212	0.581	0.717	0.696	0.665	0.747	plasma membrane	GO:0006810 transport; GO:0006811 ion transport; GO:0006812 cation transport; GO:0006816 calcium ion transport; GO:0009581 detection of external stimulus; GO:0009582 detection of abiotic stimulus; GO:0009605 response to external stimulus; GO:0009612 response to mechanical stimulus; GO:0009628 response to abiotic stimulus; GO:0030001 metal ion transport; GO:0034220 ion transmembrane transport; GO:0…	GO:0016020 membrane; GO:0016021 integral component of membrane; GO:0031224 intrinsic component of membrane; GO:0044425 membrane part;	GO:0005215 transporter activity; GO:0005216 ion channel activity; GO:0005261 cation channel activity; GO:0005262 calcium channel activity; GO:0008324 cation transmembrane transporter activity; GO:0015075 ion transmembrane transporter activity; GO:0015085 calcium ion transmembrane transporter activity; GO:0015267 channel activity; GO:0015318 inorganic solute uptake transmembrane transporter activi…
A0A452DKA9	four and a half LIM domains protein 1 isoform X8(predicted) OS=Capra hircus OX=9925 PE=4 SV=1	1.506	Up	0.00024205	---	8.8953	52.6	6	10	6	0.879	0.842	0.795	0.924	0.766	1.471	1.337	1.077	1.15	1.3	extracellular	GO:0001558 regulation of cell growth; GO:0003254 regulation of membrane depolarization; GO:0007275 multicellular organism development; GO:0007346 regulation of mitotic cell cycle; GO:0007517 muscle organ development; GO:0009653 anatomical structure morphogenesis; GO:0009887 animal organ morphogenesis; GO:0010389 regulation of G2/M transition of mitotic cell cycle; GO:0010564 regulation of cell cy…	GO:0005622 intracellular; GO:0005623 cell; GO:0005634 nucleus; GO:0005737 cytoplasm; GO:0005829 cytosol; GO:0005886 plasma membrane; GO:0016020 membrane; GO:0043226 organelle; GO:0043227 membrane-bounded organelle; GO:0043229 intracellular organelle; GO:0043231 intracellular membrane-bounded organelle; GO:0044424 intracellular part; GO:0044444 cytoplasmic part; GO:0044464 cell part; GO:0071944 ce…	GO:0005488 binding; GO:0005515 protein binding; GO:0044325 ion channel binding;	K14365	FHL1, SLIM1; four and a half LIM domains protein 1	chx04630 JAK-STAT signaling pathway - Capra hircus (goat);
A0A452DS23	N(4)-(Beta-N-acetylglucosaminyl)-L-asparaginase (Fragment)(predicted) OS=Capra hircus OX=9925 GN=AGA PE=4 SV=1	0.615	Down	1.5287e-06	AGA	37.077	39.3	11	32	11	1.242	1.218	1.178	1.143	1.427	0.783	0.757	0.745	0.728	0.805	extracellular	GO:0001775 cell activation; GO:0002252 immune effector process; GO:0002263 cell activation involved in immune response; GO:0002274 myeloid leukocyte activation; GO:0002275 myeloid cell activation involved in immune response; GO:0002283 neutrophil activation involved in immune response; GO:0002366 leukocyte activation involved in immune response; GO:0002376 immune system process; GO:0002443 leukoc…	GO:0000323 lytic vacuole; GO:0005576 extracellular region; GO:0005615 extracellular space; GO:0005622 intracellular; GO:0005623 cell; GO:0005737 cytoplasm; GO:0005764 lysosome; GO:0005766 primary lysosome; GO:0005773 vacuole; GO:0005775 vacuolar lumen; GO:0005783 endoplasmic reticulum; GO:0012505 endomembrane system; GO:0030141 secretory granule; GO:0031410 cytoplasmic vesicle; GO:0031974 membran…	GO:0003824 catalytic activity; GO:0003948 N4-(beta-N-acetylglucosaminyl)-L-asparaginase activity; GO:0005488 binding; GO:0005515 protein binding; GO:0016787 hydrolase activity; GO:0016810 hydrolase activity, acting on carbon-nitrogen (but not peptide) bonds; GO:0016811 hydrolase activity, acting on carbon-nitrogen (but not peptide) bonds, in linear amides; GO:0043621 protein self-association;	K01444	AGA, aspG; N4-(beta-N-acetylglucosaminyl)-L-asparaginase [EC:3.5.1.26]	chx00511 Other glycan degradation - Capra hircus (goat); chx04142 Lysosome - Capra hircus (goat);	PF01112	Asparaginase
A0A452DK41	ARHGAP4 protein(predicted) OS=Capra hircus OX=9925 GN=ARHGAP4 PE=4 SV=1	0.587	Down	0.029715	ARHGAP4	105.18	0.8	1	2	1	1.84	0.864	1.167	1.58	1.139	1.136	0.929	0.722	0.629	0.451	nucleus	GO:0006996 organelle organization; GO:0007010 cytoskeleton organization; GO:0007154 cell communication; GO:0007165 signal transduction; GO:0007264 small GTPase mediated signal transduction; GO:0007265 Ras protein signal transduction; GO:0007266 Rho protein signal transduction; GO:0009966 regulation of signal transduction; GO:0009967 positive regulation of signal transduction; GO:0009987 cellular …	GO:0005622 intracellular; GO:0005623 cell; GO:0005737 cytoplasm; GO:0005829 cytosol; GO:0044424 intracellular part; GO:0044444 cytoplasmic part; GO:0044464 cell part;	GO:0005070 SH3/SH2 adaptor activity; GO:0005096 GTPase activator activity; GO:0005488 binding; GO:0005515 protein binding; GO:0008047 enzyme activator activity; GO:0017016 Ras GTPase binding; GO:0017048 Rho GTPase binding; GO:0019899 enzyme binding; GO:0030234 enzyme regulator activity; GO:0030674 protein binding, bridging; GO:0030695 GTPase regulator activity; GO:0031267 small GTPase binding; GO…	K20122	ARHGAP4; Rho GTPase-activating protein 4		PF00620; PF00018	RhoGAP domain; SH3 domain
A0A452GAI7	Tetraspanin(predicted) OS=Capra hircus OX=9925 GN=TSPAN8 PE=4 SV=1	0.348	Down	6.2247e-07	TSPAN8	25.096	27.2	7	8	7	1.883	1.424	1.331	1.676	1.334	0.514	0.549	0.454	0.575	0.571	plasma membrane	GO:0000003 reproduction; GO:0007154 cell communication; GO:0007165 signal transduction; GO:0007166 cell surface receptor signaling pathway; GO:0007276 gamete generation; GO:0007283 spermatogenesis; GO:0009987 cellular process; GO:0010468 regulation of gene expression; GO:0019222 regulation of metabolic process; GO:0019953 sexual reproduction; GO:0022414 reproductive process; GO:0023052 signaling;…	GO:0005623 cell; GO:0005886 plasma membrane; GO:0005887 integral component of plasma membrane; GO:0009986 cell surface; GO:0016020 membrane; GO:0016021 integral component of membrane; GO:0031224 intrinsic component of membrane; GO:0031226 intrinsic component of plasma membrane; GO:0044425 membrane part; GO:0044459 plasma membrane part; GO:0044464 cell part; GO:0071944 cell periphery;	GO:0005102 receptor binding; GO:0005178 integrin binding; GO:0005488 binding; GO:0005515 protein binding; GO:0044877 macromolecular complex binding; GO:0050839 cell adhesion molecule binding;	K17349	TSPAN8; tetraspanin-8
A0A452E809	Phospholipase A(2)(predicted) OS=Capra hircus OX=9925 GN=PLA2G10 PE=4 SV=1	0.531	Down	0.022078	PLA2G10	17.326	44.9	6	6	6	0.966	2.293	1.114	0.885	1.328	0.44	0.591	0.777	0.93	0.757	extracellular							PF00068	Phospholipase A2
A0A452G1X4	Phospholipase B-like(predicted) OS=Capra hircus OX=9925 GN=PLBD2 PE=4 SV=1	0.474	Down	2.1226e-05	PLBD2	65.523	30.4	17	28	17	1.553	1.371	1.143	1.311	1.557	0.737	0.725	0.519	0.657	0.652	extracellular		GO:0000323 lytic vacuole; GO:0005622 intracellular; GO:0005623 cell; GO:0005737 cytoplasm; GO:0005764 lysosome; GO:0005773 vacuole; GO:0043226 organelle; GO:0043227 membrane-bounded organelle; GO:0043229 intracellular organelle; GO:0043231 intracellular membrane-bounded organelle; GO:0044424 intracellular part; GO:0044444 cytoplasmic part; GO:0044464 cell part;
A0A452EB21	Solute carrier family 2 member 3(predicted) OS=Capra hircus OX=9925 GN=SLC2A3 PE=4 SV=1	0.566	Down	2.4509e-05	SLC2A3	54.149	13.6	8	28	8	1.4	1.369	1.14	1.277	1.357	0.7	0.692	0.636	0.811	0.867	plasma membrane	GO:0001775 cell activation; GO:0002252 immune effector process; GO:0002263 cell activation involved in immune response; GO:0002274 myeloid leukocyte activation; GO:0002275 myeloid cell activation involved in immune response; GO:0002283 neutrophil activation involved in immune response; GO:0002366 leukocyte activation involved in immune response; GO:0002376 immune system process; GO:0002443 leukoc…	GO:0001669 acrosomal vesicle; GO:0002080 acrosomal membrane; GO:0005622 intracellular; GO:0005623 cell; GO:0005737 cytoplasm; GO:0005886 plasma membrane; GO:0005887 integral component of plasma membrane; GO:0005901 caveola; GO:0008021 synaptic vesicle; GO:0012505 endomembrane system; GO:0012506 vesicle membrane; GO:0016020 membrane; GO:0016021 integral component of membrane; GO:0030133 transport …	GO:0005215 transporter activity; GO:0005355 glucose transmembrane transporter activity; GO:0005488 binding; GO:0005515 protein binding; GO:0005536 glucose binding; GO:0008509 anion transmembrane transporter activity; GO:0008514 organic anion transmembrane transporter activity; GO:0015075 ion transmembrane transporter activity; GO:0015144 carbohydrate transmembrane transporter activity; GO:0015145…	K08142	SLC2A3, GLUT3; MFS transporter, SP family, solute carrier family 2 (facilitated glucose transporter), member 3
A0A452DSP1	Ubiquitin carboxyl-terminal hydrolase 14(predicted) OS=Capra hircus OX=9925 GN=USP14 PE=4 SV=1	1.698	Up	0.0020961	USP14	55.98	8.9	4	4	4	0.776	0.85	0.593	0.78	0.81	1.561	1.613	0.965	1.169	1.161	nucleus	GO:0000966 RNA 5'-end processing; GO:0006139 nucleobase-containing compound metabolic process; GO:0006396 RNA processing; GO:0006399 tRNA metabolic process; GO:0006464 cellular protein modification process; GO:0006508 proteolysis; GO:0006725 cellular aromatic compound metabolic process; GO:0006807 nitrogen compound metabolic process; GO:0007154 cell communication; GO:0007267 cell-cell signaling; …	GO:0005622 intracellular; GO:0005623 cell; GO:0005634 nucleus; GO:0005737 cytoplasm; GO:0005829 cytosol; GO:0009986 cell surface; GO:0031410 cytoplasmic vesicle; GO:0031982 vesicle; GO:0043226 organelle; GO:0043227 membrane-bounded organelle; GO:0043229 intracellular organelle; GO:0043231 intracellular membrane-bounded organelle; GO:0044424 intracellular part; GO:0044444 cytoplasmic part; GO:0044…	GO:0003824 catalytic activity; GO:0004175 endopeptidase activity; GO:0004197 cysteine-type endopeptidase activity; GO:0004843 thiol-dependent ubiquitin-specific protease activity; GO:0004857 enzyme inhibitor activity; GO:0004866 endopeptidase inhibitor activity; GO:0005488 binding; GO:0008192 RNA guanylyltransferase activity; GO:0008193 tRNA guanylyltransferase activity; GO:0008233 peptidase acti…	K11843	USP14, UBP6; ubiquitin carboxyl-terminal hydrolase 14 [EC:3.4.19.12]
A0A452F727	Syntaxin-binding protein 2(predicted) OS=Capra hircus OX=9925 PE=4 SV=1	1.535	Up	0.0005021	---	61.196	28.3	20	32	3	0.806	0.923	0.8	0.81	0.768	0.992	1.267	1.207	1.333	1.505	cytoplasm	GO:0001505 regulation of neurotransmitter levels; GO:0001775 cell activation; GO:0001906 cell killing; GO:0001909 leukocyte mediated cytotoxicity; GO:0002252 immune effector process; GO:0002263 cell activation involved in immune response; GO:0002274 myeloid leukocyte activation; GO:0002275 myeloid cell activation involved in immune response; GO:0002283 neutrophil activation involved in immune res…	GO:0000323 lytic vacuole; GO:0005576 extracellular region; GO:0005622 intracellular; GO:0005623 cell; GO:0005737 cytoplasm; GO:0005764 lysosome; GO:0005766 primary lysosome; GO:0005773 vacuole; GO:0005829 cytosol; GO:0005886 plasma membrane; GO:0012505 endomembrane system; GO:0012506 vesicle membrane; GO:0016020 membrane; GO:0016324 apical plasma membrane; GO:0030027 lamellipodium; GO:0030139 end…	GO:0000149 SNARE binding; GO:0005488 binding; GO:0005515 protein binding; GO:0017075 syntaxin-1 binding; GO:0019905 syntaxin binding; GO:0030348 syntaxin-3 binding;	K15300	STXBP2, MUNC18-2; syntaxin-binding protein 2
A0A452DNC1	Aquaporin 7(predicted) OS=Capra hircus OX=9925 GN=AQP7 PE=4 SV=1	0.599	Down	6.0668e-05	AQP7	35.97	12.4	4	12	4	1.433	1.176	1.19	1.361	1.36	0.666	0.699	0.878	0.827	0.838	plasma membrane	GO:0000003 reproduction; GO:0003008 system process; GO:0003014 renal system process; GO:0003091 renal water homeostasis; GO:0003097 renal water transport; GO:0006091 generation of precursor metabolites and energy; GO:0006810 transport; GO:0006833 water transport; GO:0007276 gamete generation; GO:0007283 spermatogenesis; GO:0007588 excretion; GO:0008152 metabolic process; GO:0008643 carbohydrate t…	GO:0005622 intracellular; GO:0005623 cell; GO:0005737 cytoplasm; GO:0005886 plasma membrane; GO:0005887 integral component of plasma membrane; GO:0005903 brush border; GO:0005911 cell-cell junction; GO:0016020 membrane; GO:0016021 integral component of membrane; GO:0030054 cell junction; GO:0031224 intrinsic component of membrane; GO:0031226 intrinsic component of plasma membrane; GO:0031253 cell…	GO:0005215 transporter activity; GO:0005372 water transmembrane transporter activity; GO:0015144 carbohydrate transmembrane transporter activity; GO:0015166 polyol transmembrane transporter activity; GO:0015168 glycerol transmembrane transporter activity; GO:0015204 urea transmembrane transporter activity; GO:0015250 water channel activity; GO:0015254 glycerol channel activity; GO:0015265 urea ch…	K08771	AQP7; aquaporin-7	chx03320 PPAR signaling pathway - Capra hircus (goat); chx04923 Regulation of lipolysis in adipocytes - Capra hircus (goat);
A0A452FRY8	Acrosin OS=Capra hircus OX=9925 GN=ACR PE=4 SV=1	0.372	Down	5.2139e-07	ACR	44.878	48.6	18	102	18	1.625	1.383	1.484	1.381	1.493	0.421	0.563	0.557	0.558	0.643	extracellular	GO:0000003 reproduction; GO:0002077 acrosome matrix dispersal; GO:0006508 proteolysis; GO:0006807 nitrogen compound metabolic process; GO:0007190 activation of adenylate cyclase activity; GO:0007338 single fertilization; GO:0007339 binding of sperm to zona pellucida; GO:0007340 acrosome reaction; GO:0007341 penetration of zona pellucida; GO:0008037 cell recognition; GO:0008152 metabolic process; …	GO:0001669 acrosomal vesicle; GO:0005576 extracellular region; GO:0005622 intracellular; GO:0005623 cell; GO:0005737 cytoplasm; GO:0005773 vacuole; GO:0005798 Golgi-associated vesicle; GO:0012505 endomembrane system; GO:0030141 secretory granule; GO:0031410 cytoplasmic vesicle; GO:0031982 vesicle; GO:0032991 macromolecular complex; GO:0043159 acrosomal matrix; GO:0043226 organelle; GO:0043227 mem…	GO:0002020 protease binding; GO:0003676 nucleic acid binding; GO:0003677 DNA binding; GO:0003824 catalytic activity; GO:0004040 amidase activity; GO:0004175 endopeptidase activity; GO:0004252 serine-type endopeptidase activity; GO:0005488 binding; GO:0005507 copper ion binding; GO:0005515 protein binding; GO:0005537 mannose binding; GO:0008144 drug binding; GO:0008233 peptidase activity; GO:00082…	K01317	ACR; acrosin [EC:3.4.21.10]		PF00089	Trypsin
A0A452FJ29	Ubiquitin-like modifier-activating enzyme 1(predicted) OS=Capra hircus OX=9925 GN=UBA1 PE=4 SV=1	1.504	Up	0.00051923	UBA1	117.5	26.9	28	48	28	0.784	0.909	0.766	0.818	0.83	1.349	1.404	0.974	1.161	1.29	nucleus	GO:0006464 cellular protein modification process; GO:0006508 proteolysis; GO:0006511 ubiquitin-dependent protein catabolic process; GO:0006807 nitrogen compound metabolic process; GO:0006950 response to stress; GO:0006974 cellular response to DNA damage stimulus; GO:0008152 metabolic process; GO:0009056 catabolic process; GO:0009057 macromolecule catabolic process; GO:0009987 cellular process; GO…	GO:0005622 intracellular; GO:0005623 cell; GO:0005634 nucleus; GO:0005737 cytoplasm; GO:0005739 mitochondrion; GO:0043226 organelle; GO:0043227 membrane-bounded organelle; GO:0043229 intracellular organelle; GO:0043231 intracellular membrane-bounded organelle; GO:0044424 intracellular part; GO:0044444 cytoplasmic part; GO:0044464 cell part;	GO:0003824 catalytic activity; GO:0004839 ubiquitin activating enzyme activity; GO:0008641 small protein activating enzyme activity; GO:0016874 ligase activity; GO:0016877 ligase activity, forming carbon-sulfur bonds;	K03178	UBE1, UBA1; ubiquitin-activating enzyme E1 [EC:6.2.1.45]	chx04120 Ubiquitin mediated proteolysis - Capra hircus (goat); chx05012 Parkinson disease - Capra hircus (goat);	PF00899; PF10585; PF09358	ThiF family; Ubiquitin-activating enzyme active site ; Ubiquitin-activating enzyme e1 C-terminal domain
A0A452FVZ1	Putative threonine protease PRSS50(predicted) OS=Capra hircus OX=9925 GN=PRSS50 PE=4 SV=1	0.562	Down	4.2819e-06	PRSS50	37.297	22	6	12	6	1.413	1.176	1.287	1.419	1.525	0.779	0.744	0.684	0.853	0.774	cytoplasm	GO:0006508 proteolysis; GO:0006807 nitrogen compound metabolic process; GO:0008152 metabolic process; GO:0019538 protein metabolic process; GO:0043170 macromolecule metabolic process; GO:0044238 primary metabolic process; GO:0071704 organic substance metabolic process; GO:1901564 organonitrogen compound metabolic process;	GO:0005622 intracellular; GO:0005623 cell; GO:0005737 cytoplasm; GO:0005783 endoplasmic reticulum; GO:0012505 endomembrane system; GO:0043226 organelle; GO:0043227 membrane-bounded organelle; GO:0043229 intracellular organelle; GO:0043231 intracellular membrane-bounded organelle; GO:0044424 intracellular part; GO:0044444 cytoplasmic part; GO:0044464 cell part;	GO:0003824 catalytic activity; GO:0004175 endopeptidase activity; GO:0004298 threonine-type endopeptidase activity; GO:0008233 peptidase activity; GO:0016787 hydrolase activity; GO:0070003 threonine-type peptidase activity; GO:0070011 peptidase activity, acting on L-amino acid peptides;				PF00089	Trypsin
A0A452FR08	trafficking protein particle complex subunit 2-like protein isoform X2(predicted) OS=Capra hircus OX=9925 GN=TRAPPC2L PE=4 SV=1	1.599	Up	1.73748e-05	TRAPPC2L	15.985	12.9	2	3	2	0.877	0.76	0.81	0.826	0.738	1.23	1.495	1.192	1.248	1.248	cytoplasm	GO:0009987 cellular process; GO:0016043 cellular component organization; GO:0022607 cellular component assembly; GO:0043933 macromolecular complex subunit organization; GO:0044085 cellular component biogenesis; GO:0051259 protein oligomerization; GO:0065003 macromolecular complex assembly; GO:0071840 cellular component organization or biogenesis;	GO:0005622 intracellular; GO:0005623 cell; GO:0005737 cytoplasm; GO:0005829 cytosol; GO:0030008 TRAPP complex; GO:0032991 macromolecular complex; GO:0043226 organelle; GO:0043227 membrane-bounded organelle; GO:0043229 intracellular organelle; GO:0043231 intracellular membrane-bounded organelle; GO:0044424 intracellular part; GO:0044444 cytoplasmic part; GO:0044464 cell part; GO:0099023 tethering …		K20301	TRAPPC2, TRS20; trafficking protein particle complex subunit 2
A0A452EV37	Osteoglycin(predicted) OS=Capra hircus OX=9925 GN=OGN PE=4 SV=1	1.694	Up	0.00087819	OGN	34.16	23.4	8	16	8	0.664	0.92	0.715	0.667	0.884	1.346	1.668	1.263	1.084	1.159	extracellular	GO:0000902 cell morphogenesis; GO:0000904 cell morphogenesis involved in differentiation; GO:0006022 aminoglycan metabolic process; GO:0006023 aminoglycan biosynthetic process; GO:0006024 glycosaminoglycan biosynthetic process; GO:0006026 aminoglycan catabolic process; GO:0006027 glycosaminoglycan catabolic process; GO:0006082 organic acid metabolic process; GO:0006790 sulfur compound metabolic p…	GO:0000323 lytic vacuole; GO:0005576 extracellular region; GO:0005615 extracellular space; GO:0005622 intracellular; GO:0005623 cell; GO:0005737 cytoplasm; GO:0005764 lysosome; GO:0005773 vacuole; GO:0005775 vacuolar lumen; GO:0005794 Golgi apparatus; GO:0005796 Golgi lumen; GO:0012505 endomembrane system; GO:0031974 membrane-enclosed lumen; GO:0043202 lysosomal lumen; GO:0043226 organelle; GO:00…		K08126	OGN; osteoglycin (osteoinductive factor, mimecan)
A0A452FB33	Beta-galactosidase-1-like protein(predicted) OS=Capra hircus OX=9925 GN=GLB1L PE=4 SV=1	0.604	Down	1.1282e-06	GLB1L	73.253	21.3	11	26	10	1.319	1.427	1.17	1.252	1.281	0.812	0.726	0.759	0.755	0.843	plasma membrane		GO:0005622 intracellular; GO:0005623 cell; GO:0005737 cytoplasm; GO:0005773 vacuole; GO:0043226 organelle; GO:0043227 membrane-bounded organelle; GO:0043229 intracellular organelle; GO:0043231 intracellular membrane-bounded organelle; GO:0044424 intracellular part; GO:0044444 cytoplasmic part; GO:0044464 cell part;	GO:0003824 catalytic activity; GO:0004553 hydrolase activity, hydrolyzing O-glycosyl compounds; GO:0004565 beta-galactosidase activity; GO:0015925 galactosidase activity; GO:0016787 hydrolase activity; GO:0016798 hydrolase activity, acting on glycosyl bonds;				PF01301	Glycosyl hydrolases family 35
A0A452DUE2	Axonemal dynein light intermediate polypeptide 1 (Fragment)(predicted) OS=Capra hircus OX=9925 GN=DNALI1 PE=4 SV=1	0.557	Down	0.0031776	DNALI1	29.672	43.8	14	20	14	1.672	1.141	1.075	1.558	1.241	0.734	0.706	0.802	0.771	0.715	cytoplasm	GO:0003341 cilium movement; GO:0006928 movement of cell or subcellular component; GO:0007017 microtubule-based process; GO:0007018 microtubule-based movement; GO:0009987 cellular process;	GO:0005622 intracellular; GO:0005623 cell; GO:0005737 cytoplasm; GO:0005856 cytoskeleton; GO:0005929 cilium; GO:0005930 axoneme; GO:0030175 filopodium; GO:0031514 motile cilium; GO:0032838 cell projection cytoplasm; GO:0042995 cell projection; GO:0043226 organelle; GO:0043228 non-membrane-bounded organelle; GO:0043229 intracellular organelle; GO:0043232 intracellular non-membrane-bounded organell…	GO:0005488 binding; GO:0005515 protein binding; GO:0045504 dynein heavy chain binding;	K10410	DNALI; dynein light intermediate chain, axonemal	chx05016 Huntington disease - Capra hircus (goat);
A0A059U1E1	Beta-defensin OS=Capra hircus OX=9925 PE=2 SV=1	0.51	Down	0.0043376	---	7.5138	21.9	2	3	2	1.515	1.115	0.93	1.483	1.371	0.655	0.483	0.822	0.409	0.904	extracellular				K13720	NAAA; N-acylethanolamine-hydrolysing acid amidase [EC:3.5.1.-]		PF13841	Beta defensin
A0A452FL64	Resistin(predicted) OS=Capra hircus OX=9925 GN=RETN PE=4 SV=1	0.499	Down	0.00081767	RETN	11.534	27.5	2	2	2	1.332	1.022	1.38	2.04	1.196	0.666	0.651	0.728	0.587	0.843	extracellular	GO:0001775 cell activation; GO:0002252 immune effector process; GO:0002263 cell activation involved in immune response; GO:0002274 myeloid leukocyte activation; GO:0002275 myeloid cell activation involved in immune response; GO:0002283 neutrophil activation involved in immune response; GO:0002366 leukocyte activation involved in immune response; GO:0002376 immune system process; GO:0002443 leukoc…	GO:0000323 lytic vacuole; GO:0005576 extracellular region; GO:0005615 extracellular space; GO:0005622 intracellular; GO:0005623 cell; GO:0005634 nucleus; GO:0005737 cytoplasm; GO:0005764 lysosome; GO:0005766 primary lysosome; GO:0005773 vacuole; GO:0005775 vacuolar lumen; GO:0012505 endomembrane system; GO:0030141 secretory granule; GO:0031410 cytoplasmic vesicle; GO:0031974 membrane-enclosed lum…	GO:0005102 receptor binding; GO:0005179 hormone activity; GO:0005488 binding; GO:0005515 protein binding; GO:0030545 receptor regulator activity; GO:0048018 receptor agonist activity; GO:0098772 molecular function regulator;	K13438	RETN; resistin
A0A452FLX5	Testis-specific lysozyme-like protein 2(predicted) OS=Capra hircus OX=9925 GN=LOC102188781 PE=4 SV=1	0.593	Down	0.027701	LOC102188781	16.791	37.2	7	23	7	1.401	1.494	0.699	1.036	1.647	0.909	0.696	0.521	0.708	0.886	extracellular	GO:0006950 response to stress; GO:0006952 defense response; GO:0008152 metabolic process; GO:0009056 catabolic process; GO:0009605 response to external stimulus; GO:0009607 response to biotic stimulus; GO:0009617 response to bacterium; GO:0009987 cellular process; GO:0016998 cell wall macromolecule catabolic process; GO:0042742 defense response to bacterium; GO:0043170 macromolecule metabolic pro…	GO:0005576 extracellular region; GO:0005615 extracellular space; GO:0044421 extracellular region part;	GO:0003796 lysozyme activity; GO:0003824 catalytic activity; GO:0004553 hydrolase activity, hydrolyzing O-glycosyl compounds; GO:0016787 hydrolase activity; GO:0016798 hydrolase activity, acting on glycosyl bonds; GO:0061783 peptidoglycan muralytic activity;	K01185	E3.2.1.17; lysozyme [EC:3.2.1.17]		PF00062	C-type lysozyme/alpha-lactalbumin family
A0A452FW25	Phospholipase B-like(predicted) OS=Capra hircus OX=9925 GN=PLBD1 PE=4 SV=1	0.439	Down	3.9918e-08	PLBD1	60.984	33.3	14	25	14	1.402	1.403	1.471	1.296	1.551	0.571	0.623	0.592	0.688	0.655	cytoplasm,nucleus	GO:0006629 lipid metabolic process; GO:0006644 phospholipid metabolic process; GO:0006650 glycerophospholipid metabolic process; GO:0006793 phosphorus metabolic process; GO:0006796 phosphate-containing compound metabolic process; GO:0006807 nitrogen compound metabolic process; GO:0008152 metabolic process; GO:0009987 cellular process; GO:0019637 organophosphate metabolic process; GO:0036149 phosp…	GO:0005576 extracellular region; GO:0005615 extracellular space; GO:0005622 intracellular; GO:0005623 cell; GO:0005737 cytoplasm; GO:0005829 cytosol; GO:0044421 extracellular region part; GO:0044424 intracellular part; GO:0044444 cytoplasmic part; GO:0044464 cell part;	GO:0003824 catalytic activity; GO:0004620 phospholipase activity; GO:0004622 lysophospholipase activity; GO:0004623 phospholipase A2 activity; GO:0016298 lipase activity; GO:0016787 hydrolase activity; GO:0016788 hydrolase activity, acting on ester bonds; GO:0052689 carboxylic ester hydrolase activity;
A0A452EEX0	Vesicle-fusing ATPase-like protein(predicted) OS=Capra hircus OX=9925 GN=NSF PE=4 SV=1	1.723	Up	5.7056e-05	NSF	83.623	47.3	37	62	37	0.748	0.779	0.69	0.802	0.735	1.234	1.543	1.06	1.226	1.406	cytoplasm	GO:0001505 regulation of neurotransmitter levels; GO:0001919 regulation of receptor recycling; GO:0001921 positive regulation of receptor recycling; GO:0002090 regulation of receptor internalization; GO:0006810 transport; GO:0006811 ion transport; GO:0006812 cation transport; GO:0006813 potassium ion transport; GO:0006836 neurotransmitter transport; GO:0006886 intracellular protein transport; GO:…	GO:0005622 intracellular; GO:0005623 cell; GO:0005737 cytoplasm; GO:0005794 Golgi apparatus; GO:0005795 Golgi stack; GO:0005829 cytosol; GO:0005886 plasma membrane; GO:0012505 endomembrane system; GO:0014069 postsynaptic density; GO:0016020 membrane; GO:0030425 dendrite; GO:0030496 midbody; GO:0031984 organelle subcompartment; GO:0032279 asymmetric synapse; GO:0036477 somatodendritic compartment;…	GO:0000149 SNARE binding; GO:0001664 G-protein coupled receptor binding; GO:0003824 catalytic activity; GO:0005102 receptor binding; GO:0005488 binding; GO:0005515 protein binding; GO:0008022 protein C-terminus binding; GO:0016462 pyrophosphatase activity; GO:0016787 hydrolase activity; GO:0016817 hydrolase activity, acting on acid anhydrides; GO:0016818 hydrolase activity, acting on acid anhydri…	K06027	NSF, SEC18; vesicle-fusing ATPase [EC:3.6.4.6]	chx04721 Synaptic vesicle cycle - Capra hircus (goat); chx04727 GABAergic synapse - Capra hircus (goat); chx04962 Vasopressin-regulated water reabsorption - Capra hircus (goat);	PF02359; PF02933; PF00004	Cell division protein 48 (CDC48), N-terminal domain; Cell division protein 48 (CDC48), domain 2; ATPase family associated with various cellular activities (AAA)
A0A452E9L8	Immunoglobulin light chain, lambda gene cluster(predicted) OS=Capra hircus OX=9925 PE=4 SV=1	0.581	Down	0.0054792	---	14.353	31.2	2	3	2	1.079	1.318	1.778	1.074	1.39	0.759	0.764	0.847	0.756	0.728	extracellular							PF07686	Immunoglobulin V-set domain
A0A452DZE7	Protein S100(predicted) OS=Capra hircus OX=9925 GN=S100A11 PE=4 SV=1	0.604	Down	0.0131199	S100A11	11.278	19.4	3	3	3	0.885	1.551	1.42	0.975	1.667	0.757	0.635	0.654	0.979	0.899	mitochondria	GO:0001775 cell activation; GO:0002252 immune effector process; GO:0002263 cell activation involved in immune response; GO:0002274 myeloid leukocyte activation; GO:0002275 myeloid cell activation involved in immune response; GO:0002283 neutrophil activation involved in immune response; GO:0002366 leukocyte activation involved in immune response; GO:0002376 immune system process; GO:0002443 leukoc…	GO:0001726 ruffle; GO:0005622 intracellular; GO:0005623 cell; GO:0005634 nucleus; GO:0005737 cytoplasm; GO:0012505 endomembrane system; GO:0030141 secretory granule; GO:0031252 cell leading edge; GO:0031410 cytoplasmic vesicle; GO:0031974 membrane-enclosed lumen; GO:0031982 vesicle; GO:0031983 vesicle lumen; GO:0034774 secretory granule lumen; GO:0042995 cell projection; GO:0043226 organelle; GO:…	GO:0005488 binding; GO:0005515 protein binding; GO:0042802 identical protein binding; GO:0042803 protein homodimerization activity; GO:0044548 S100 protein binding; GO:0046983 protein dimerization activity; GO:0048306 calcium-dependent protein binding;				PF01023; PF00036	S-100/ICaBP type calcium binding domain; EF hand
A0A452FXH3	26S proteasome non-ATPase regulatory subunit 6(predicted) OS=Capra hircus OX=9925 GN=PSMD6 PE=4 SV=1	1.59	Up	0.000143755	PSMD6	45.519	43.2	18	23	18	0.803	0.798	0.72	0.881	0.704	1.371	1.363	1.015	1.196	1.267	cytoplasm	GO:0001775 cell activation; GO:0002252 immune effector process; GO:0002263 cell activation involved in immune response; GO:0002274 myeloid leukocyte activation; GO:0002275 myeloid cell activation involved in immune response; GO:0002283 neutrophil activation involved in immune response; GO:0002366 leukocyte activation involved in immune response; GO:0002376 immune system process; GO:0002443 leukoc…	GO:0000502 proteasome complex; GO:0005576 extracellular region; GO:0005622 intracellular; GO:0005623 cell; GO:0005634 nucleus; GO:0005654 nucleoplasm; GO:0005737 cytoplasm; GO:0005829 cytosol; GO:0005838 proteasome regulatory particle; GO:0012505 endomembrane system; GO:0022624 proteasome accessory complex; GO:0030141 secretory granule; GO:0031410 cytoplasmic vesicle; GO:0031974 membrane-enclosed…	GO:0003824 catalytic activity; GO:0016462 pyrophosphatase activity; GO:0016787 hydrolase activity; GO:0016817 hydrolase activity, acting on acid anhydrides; GO:0016818 hydrolase activity, acting on acid anhydrides, in phosphorus-containing anhydrides; GO:0016887 ATPase activity; GO:0017111 nucleoside-triphosphatase activity;	K03037	PSMD6, RPN7; 26S proteasome regulatory subunit N7	chx03050 Proteasome - Capra hircus (goat); chx05169 Epstein-Barr virus infection - Capra hircus (goat);	PF01399	PCI domain
A0A452E294	Superoxide dismutase(predicted) OS=Capra hircus OX=9925 GN=SOD2 PE=4 SV=1	0.408	Down	5.545e-05	SOD2	24.58	41.4	8	23	8	1.734	1.231	1.575	1.668	1.184	0.697	0.556	0.45	0.609	0.704	mitochondria	GO:0000302 response to reactive oxygen species; GO:0000303 response to superoxide; GO:0000305 response to oxygen radical; GO:0001101 response to acid chemical; GO:0001306 age-dependent response to oxidative stress; GO:0001315 age-dependent response to reactive oxygen species; GO:0001505 regulation of neurotransmitter levels; GO:0001666 response to hypoxia; GO:0001836 release of cytochrome c from …	GO:0005622 intracellular; GO:0005623 cell; GO:0005737 cytoplasm; GO:0005739 mitochondrion; GO:0005759 mitochondrial matrix; GO:0009295 nucleoid; GO:0031974 membrane-enclosed lumen; GO:0042645 mitochondrial nucleoid; GO:0043209 myelin sheath; GO:0043226 organelle; GO:0043227 membrane-bounded organelle; GO:0043228 non-membrane-bounded organelle; GO:0043229 intracellular organelle; GO:0043231 intrac…	GO:0003676 nucleic acid binding; GO:0003677 DNA binding; GO:0003824 catalytic activity; GO:0004784 superoxide dismutase activity; GO:0005488 binding; GO:0005515 protein binding; GO:0008144 drug binding; GO:0016209 antioxidant activity; GO:0016491 oxidoreductase activity; GO:0016721 oxidoreductase activity, acting on superoxide radicals as acceptor; GO:0019825 oxygen binding; GO:0019899 enzyme bin…	K04564	SOD2; superoxide dismutase, Fe-Mn family [EC:1.15.1.1]	chx04068 FoxO signaling pathway - Capra hircus (goat); chx04146 Peroxisome - Capra hircus (goat); chx04211 Longevity regulating pathway - Capra hircus (goat); chx04213 Longevity regulating pathway - multiple species - Capra hircus (goat); chx05016 Huntington disease - Capra hircus (goat);	PF00081; PF02777	Iron/manganese superoxide dismutases, alpha-hairpin domain; Iron/manganese superoxide dismutases, C-terminal domain
A0A452DWU1	Histone H4(predicted) OS=Capra hircus OX=9925 GN=LOC102180307 PE=4 SV=1	0.6	Down	0.0033625	LOC102180307	11.367	40.8	4	6	4	1.256	1.308	1.643	1.342	1.054	0.687	0.567	1.033	0.912	0.763	nucleus
A0A452DZA2	Outer dense fiber protein 2(predicted) OS=Capra hircus OX=9925 GN=ODF2 PE=4 SV=1	0.461	Down	8.2626e-05	ODF2	95.509	21.8	15	17	15	1.467	1.19	1.898	1.213	1.174	0.526	0.647	0.676	0.695	0.657	nucleus	GO:0000003 reproduction; GO:0000086 G2/M transition of mitotic cell cycle; GO:0000226 microtubule cytoskeleton organization; GO:0000278 mitotic cell cycle; GO:0003006 developmental process involved in reproduction; GO:0006996 organelle organization; GO:0007010 cytoskeleton organization; GO:0007017 microtubule-based process; GO:0007049 cell cycle; GO:0007098 centrosome cycle; GO:0007276 gamete gen…	GO:0001520 outer dense fiber; GO:0005622 intracellular; GO:0005623 cell; GO:0005737 cytoplasm; GO:0005813 centrosome; GO:0005814 centriole; GO:0005815 microtubule organizing center; GO:0005829 cytosol; GO:0005856 cytoskeleton; GO:0005929 cilium; GO:0015630 microtubule cytoskeleton; GO:0031514 motile cilium; GO:0032991 macromolecular complex; GO:0036064 ciliary basal body; GO:0036126 sperm flagell…	GO:0005198 structural molecule activity; GO:0005200 structural constituent of cytoskeleton; GO:0005488 binding; GO:0005515 protein binding; GO:0017016 Ras GTPase binding; GO:0017137 Rab GTPase binding; GO:0019899 enzyme binding; GO:0031267 small GTPase binding; GO:0051020 GTPase binding;
A0A452DKC0	fibrous sheath-interacting protein 2-like(predicted) OS=Capra hircus OX=9925 PE=4 SV=1	1.574	Up	0.025123	---	18.623	4.5	1	1	1	0.673	0.975	0.669	0.842	0.878	1.721	1.508	0.882	0.896	1.347	cytoplasm		GO:0005622 intracellular; GO:0005623 cell; GO:0005737 cytoplasm; GO:0005739 mitochondrion; GO:0043226 organelle; GO:0043227 membrane-bounded organelle; GO:0043229 intracellular organelle; GO:0043231 intracellular membrane-bounded organelle; GO:0044424 intracellular part; GO:0044444 cytoplasmic part; GO:0044464 cell part;
A0A452FQK7	TKFC(predicted) OS=Capra hircus OX=9925 GN=TKFC PE=4 SV=1	1.517	Up	0.0027815	TKFC	59.088	56.1	24	64	24	0.739	0.932	0.747	0.802	0.853	1.512	1.074	1.075	1.033	1.485	extracellular	GO:0001817 regulation of cytokine production; GO:0002376 immune system process; GO:0002682 regulation of immune system process; GO:0002683 negative regulation of immune system process; GO:0002697 regulation of immune effector process; GO:0002698 negative regulation of immune effector process; GO:0002831 regulation of response to biotic stimulus; GO:0002832 negative regulation of response to bioti…	GO:0005622 intracellular; GO:0005623 cell; GO:0005737 cytoplasm; GO:0005829 cytosol; GO:0044424 intracellular part; GO:0044444 cytoplasmic part; GO:0044464 cell part;	GO:0003824 catalytic activity; GO:0004371 glycerone kinase activity; GO:0009975 cyclase activity; GO:0016301 kinase activity; GO:0016740 transferase activity; GO:0016772 transferase activity, transferring phosphorus-containing groups; GO:0016773 phosphotransferase activity, alcohol group as acceptor; GO:0016829 lyase activity; GO:0016849 phosphorus-oxygen lyase activity; GO:0034012 FAD-AMP lyase …
A0A452DN57	Dynein regulatory complex protein 1(predicted) OS=Capra hircus OX=9925 GN=DRC1 PE=4 SV=1	0.53	Down	0.0034227	DRC1	84.084	1.4	1	1	1	1.786	1.029	1.037	1.777	1.203	0.659	0.544	0.874	0.835	0.707	cytoplasm,nucleus	GO:0000226 microtubule cytoskeleton organization; GO:0001539 cilium or flagellum-dependent cell motility; GO:0001578 microtubule bundle formation; GO:0006928 movement of cell or subcellular component; GO:0006996 organelle organization; GO:0007010 cytoskeleton organization; GO:0007017 microtubule-based process; GO:0007275 multicellular organism development; GO:0007368 determination of left/right s…	GO:0005622 intracellular; GO:0005623 cell; GO:0005737 cytoplasm; GO:0005829 cytosol; GO:0005856 cytoskeleton; GO:0005929 cilium; GO:0005930 axoneme; GO:0032838 cell projection cytoplasm; GO:0042995 cell projection; GO:0043226 organelle; GO:0043228 non-membrane-bounded organelle; GO:0043229 intracellular organelle; GO:0043232 intracellular non-membrane-bounded organelle; GO:0044422 organelle part;…		K19754	DRC1; dynein regulatry complex protein 1
A0A452DZX8	Anoctamin(predicted) OS=Capra hircus OX=9925 GN=ANO5 PE=4 SV=1	0.395	Down	0.029443	ANO5	100.36	2.9	2	2	2	2.537	0.802	0.857	2.184	1.082	0.596	0.673	0.58	0.615	0.485	plasma membrane	GO:0006810 transport; GO:0006811 ion transport; GO:0006820 anion transport; GO:0006821 chloride transport; GO:0015698 inorganic anion transport; GO:0034220 ion transmembrane transport; GO:0051179 localization; GO:0051234 establishment of localization; GO:0055085 transmembrane transport; GO:0098656 anion transmembrane transport; GO:0098660 inorganic ion transmembrane transport; GO:0098661 inorgani…	GO:0005622 intracellular; GO:0005623 cell; GO:0005886 plasma membrane; GO:0016020 membrane; GO:0031982 vesicle; GO:0043226 organelle; GO:0043227 membrane-bounded organelle; GO:0044464 cell part; GO:0071944 cell periphery;	GO:0005215 transporter activity; GO:0005216 ion channel activity; GO:0005229 intracellular calcium activated chloride channel activity; GO:0005253 anion channel activity; GO:0005254 chloride channel activity; GO:0008509 anion transmembrane transporter activity; GO:0015075 ion transmembrane transporter activity; GO:0015103 inorganic anion transmembrane transporter activity; GO:0015108 chloride tra…	K19480	ANO5, GDD1, TMEM16E; anoctamin-5
A0A452E2A6	Choline dehydrogenase(predicted) OS=Capra hircus OX=9925 GN=CHDH PE=4 SV=1	0.554	Down	0.000155333	CHDH	65.532	1.7	1	1	1	1.501	1.123	1.401	1.305	1.388	0.642	0.771	0.785	0.609	0.918	mitochondria	GO:0001505 regulation of neurotransmitter levels; GO:0006576 cellular biogenic amine metabolic process; GO:0006807 nitrogen compound metabolic process; GO:0008152 metabolic process; GO:0009056 catabolic process; GO:0009308 amine metabolic process; GO:0009310 amine catabolic process; GO:0009987 cellular process; GO:0019695 choline metabolic process; GO:0034641 cellular nitrogen compound metabolic …	GO:0005622 intracellular; GO:0005623 cell; GO:0005737 cytoplasm; GO:0005739 mitochondrion; GO:0005740 mitochondrial envelope; GO:0005743 mitochondrial inner membrane; GO:0016020 membrane; GO:0019866 organelle inner membrane; GO:0031090 organelle membrane; GO:0031966 mitochondrial membrane; GO:0031967 organelle envelope; GO:0031975 envelope; GO:0043226 organelle; GO:0043227 membrane-bounded organe…	GO:0003824 catalytic activity; GO:0008812 choline dehydrogenase activity; GO:0016491 oxidoreductase activity; GO:0016614 oxidoreductase activity, acting on CH-OH group of donors;	K00108	betA, CHDH; choline dehydrogenase [EC:1.1.99.1]	chx00260 Glycine, serine and threonine metabolism - Capra hircus (goat); chx01100 Metabolic pathways - Capra hircus (goat);	PF00732; PF05199	GMC oxidoreductase; GMC oxidoreductase
A0A452FSF2	Deoxyhypusine hydroxylase(predicted) OS=Capra hircus OX=9925 GN=DOHH PE=4 SV=1	1.572	Up	0.0067816	DOHH	33.439	9.9	2	2	2	0.78	0.772	0.822	0.839	0.849	1.731	1.139	1.158	1.265	1.094	cytoplasm	GO:0006464 cellular protein modification process; GO:0006807 nitrogen compound metabolic process; GO:0008152 metabolic process; GO:0008612 peptidyl-lysine modification to peptidyl-hypusine; GO:0009058 biosynthetic process; GO:0009987 cellular process; GO:0010467 gene expression; GO:0018193 peptidyl-amino acid modification; GO:0018205 peptidyl-lysine modification; GO:0019538 protein metabolic proc…	GO:0005622 intracellular; GO:0005623 cell; GO:0005737 cytoplasm; GO:0005829 cytosol; GO:0044424 intracellular part; GO:0044444 cytoplasmic part; GO:0044464 cell part;	GO:0003824 catalytic activity; GO:0004497 monooxygenase activity; GO:0005488 binding; GO:0005506 iron ion binding; GO:0016491 oxidoreductase activity; GO:0016705 oxidoreductase activity, acting on paired donors, with incorporation or reduction of molecular oxygen; GO:0019135 deoxyhypusine monooxygenase activity; GO:0043167 ion binding; GO:0043169 cation binding; GO:0046872 metal ion binding; GO:0…	K06072	DOHH; deoxyhypusine monooxygenase [EC:1.14.99.29]
A0A452EQ72	Hypothetical LOC539526(predicted) OS=Capra hircus OX=9925 GN=SAXO1 PE=4 SV=1	0.529	Down	0.0100978	SAXO1	49.646	5.3	2	2	2	1.6	1.633	0.67	1.488	1.44	0.666	0.641	0.888	0.753	0.665	extracellular	GO:0006950 response to stress; GO:0009266 response to temperature stimulus; GO:0009409 response to cold; GO:0009628 response to abiotic stimulus; GO:0009631 cold acclimation; GO:0009987 cellular process; GO:0010638 positive regulation of organelle organization; GO:0031344 regulation of cell projection organization; GO:0031346 positive regulation of cell projection organization; GO:0031647 regulat…	GO:0005622 intracellular; GO:0005623 cell; GO:0005737 cytoplasm; GO:0005814 centriole; GO:0005815 microtubule organizing center; GO:0005856 cytoskeleton; GO:0005874 microtubule; GO:0005879 axonemal microtubule; GO:0005881 cytoplasmic microtubule; GO:0005929 cilium; GO:0005930 axoneme; GO:0015630 microtubule cytoskeleton; GO:0031514 motile cilium; GO:0032838 cell projection cytoplasm; GO:0036064 c…	GO:0005488 binding; GO:0005515 protein binding; GO:0008017 microtubule binding; GO:0008092 cytoskeletal protein binding; GO:0015631 tubulin binding;
A0A452EY56	26S protease regulatory subunit 4(predicted) OS=Capra hircus OX=9925 GN=PSMC1 PE=4 SV=1	1.526	Up	2.0239e-05	PSMC1	49.181	53.9	22	35	22	0.808	0.804	0.783	0.89	0.786	1.299	1.383	1.079	1.239	1.212	cytoplasm,nucleus	GO:0006355 regulation of transcription, DNA-templated; GO:0006357 regulation of transcription from RNA polymerase II promoter; GO:0006457 protein folding; GO:0006464 cellular protein modification process; GO:0006508 proteolysis; GO:0006511 ubiquitin-dependent protein catabolic process; GO:0006807 nitrogen compound metabolic process; GO:0006950 response to stress; GO:0008152 metabolic process; GO:…	GO:0000502 proteasome complex; GO:0005622 intracellular; GO:0005623 cell; GO:0005634 nucleus; GO:0005654 nucleoplasm; GO:0005737 cytoplasm; GO:0005829 cytosol; GO:0005838 proteasome regulatory particle; GO:0008540 proteasome regulatory particle, base subcomplex; GO:0022624 proteasome accessory complex; GO:0031595 nuclear proteasome complex; GO:0031597 cytosolic proteasome complex; GO:0031974 memb…	GO:0003824 catalytic activity; GO:0005488 binding; GO:0005515 protein binding; GO:0008134 transcription factor binding; GO:0016462 pyrophosphatase activity; GO:0016787 hydrolase activity; GO:0016817 hydrolase activity, acting on acid anhydrides; GO:0016818 hydrolase activity, acting on acid anhydrides, in phosphorus-containing anhydrides; GO:0016887 ATPase activity; GO:0017025 TBP-class protein b…	K03062	PSMC1, RPT2; 26S proteasome regulatory subunit T2	chx03050 Proteasome - Capra hircus (goat); chx05165 Human papillomavirus infection - Capra hircus (goat); chx05169 Epstein-Barr virus infection - Capra hircus (goat); chx05203 Viral carcinogenesis - Capra hircus (goat);	PF00004	ATPase family associated with various cellular activities (AAA)
A0A452F4X2	Maestro heat-like repeat-containing protein family member 1(predicted) OS=Capra hircus OX=9925 GN=MROH1 PE=4 SV=1	1.758	Up	2.049e-05	MROH1	177.78	27.7	39	66	39	0.721	0.758	0.8	0.742	0.709	1.263	1.562	1.112	1.211	1.411	nucleus
A0A452DW23	vitelline membrane outer layer protein 1 homolog(predicted) OS=Capra hircus OX=9925 GN=VMO1 PE=4 SV=1	0.479	Down	0.009075	VMO1	21.343	40.9	5	8	5	0.943	2.443	1.022	1.095	1.566	0.637	0.51	0.929	0.625	0.684	extracellular
A0A452EDI0	Lysosomal-associated membrane protein 2(predicted) OS=Capra hircus OX=9925 GN=LAMP2 PE=4 SV=1	0.611	Down	4.904e-07	LAMP2	54.154	10.1	6	12	6	1.276	1.277	1.291	1.357	1.234	0.812	0.73	0.877	0.778	0.736	plasma membrane				K06528	LAMP1_2, CD107; lysosomal-associated membrane protein 1/2	chx04140 Autophagy - animal - Capra hircus (goat); chx04142 Lysosome - Capra hircus (goat); chx04145 Phagosome - Capra hircus (goat); chx05152 Tuberculosis - Capra hircus (goat);
A0A452EF84	Coiled-coil domain-containing protein 63(predicted) OS=Capra hircus OX=9925 GN=CCDC63 PE=4 SV=1	0.543	Down	0.00019559	CCDC63	65.54	9.5	5	5	5	1.646	1.183	1.163	1.421	1.117	0.673	0.645	0.883	0.693	0.65	nucleus	GO:0000003 reproduction; GO:0000226 microtubule cytoskeleton organization; GO:0001578 microtubule bundle formation; GO:0003006 developmental process involved in reproduction; GO:0003341 cilium movement; GO:0006928 movement of cell or subcellular component; GO:0006996 organelle organization; GO:0007010 cytoskeleton organization; GO:0007017 microtubule-based process; GO:0007018 microtubule-based mo…	GO:0005622 intracellular; GO:0005623 cell; GO:0005737 cytoplasm; GO:0005856 cytoskeleton; GO:0005929 cilium; GO:0005930 axoneme; GO:0032838 cell projection cytoplasm; GO:0042995 cell projection; GO:0043226 organelle; GO:0043228 non-membrane-bounded organelle; GO:0043229 intracellular organelle; GO:0043232 intracellular non-membrane-bounded organelle; GO:0044422 organelle part; GO:0044424 intracel…		K23732
A0A452DXA3	Small membrane A-kinase anchor protein(predicted) OS=Capra hircus OX=9925 GN=C2orf88 PE=4 SV=1	1.882	Up	0.0089372	C2orf88	10.969	27.4	3	3	3	0.772	0.757	0.692	0.68	0.693	0.991	1.65	1.11	1.138	1.876	mitochondria
A0A452E1K0	UMP-CMP kinase(predicted) OS=Capra hircus OX=9925 GN=CMPK1 PE=4 SV=1	1.555	Up	0.00044194	CMPK1	25.985	23.7	5	6	5	0.842	0.793	0.737	0.889	0.8	1.208	1.421	0.998	1.216	1.47	mitochondria	GO:0000003 reproduction; GO:0006082 organic acid metabolic process; GO:0006139 nucleobase-containing compound metabolic process; GO:0006165 nucleoside diphosphate phosphorylation; GO:0006213 pyrimidine nucleoside metabolic process; GO:0006220 pyrimidine nucleotide metabolic process; GO:0006221 pyrimidine nucleotide biosynthetic process; GO:0006222 UMP biosynthetic process; GO:0006225 UDP biosynth…	GO:0005622 intracellular; GO:0005623 cell; GO:0005634 nucleus; GO:0005730 nucleolus; GO:0005737 cytoplasm; GO:0005829 cytosol; GO:0031974 membrane-enclosed lumen; GO:0031981 nuclear lumen; GO:0043226 organelle; GO:0043227 membrane-bounded organelle; GO:0043228 non-membrane-bounded organelle; GO:0043229 intracellular organelle; GO:0043231 intracellular membrane-bounded organelle; GO:0043232 intrac…	GO:0003824 catalytic activity; GO:0004127 cytidylate kinase activity; GO:0004550 nucleoside diphosphate kinase activity; GO:0004849 uridine kinase activity; GO:0009041 uridylate kinase activity; GO:0016301 kinase activity; GO:0016740 transferase activity; GO:0016772 transferase activity, transferring phosphorus-containing groups; GO:0016776 phosphotransferase activity, phosphate group as acceptor…	K13800	CMPK1, UMPK; UMP-CMP kinase [EC:2.7.4.- 2.7.4.14]	chx00240 Pyrimidine metabolism - Capra hircus (goat); chx00983 Drug metabolism - other enzymes - Capra hircus (goat); chx01100 Metabolic pathways - Capra hircus (goat);	PF00406	Adenylate kinase
A0A452G852	UPF0160 protein MYG1, mitochondrial(predicted) OS=Capra hircus OX=9925 GN=C12orf10 PE=4 SV=1	1.503	Up	0.021155	C12orf10	42.848	27.3	8	11	8	0.771	1.002	0.577	0.815	0.999	1.639	1.424	0.937	1.065	1.195	mitochondria	GO:0007610 behavior; GO:0007626 locomotory behavior; GO:0035640 exploration behavior; GO:0035641 locomotory exploration behavior;	GO:0005622 intracellular; GO:0005623 cell; GO:0005634 nucleus; GO:0005654 nucleoplasm; GO:0005737 cytoplasm; GO:0005739 mitochondrion; GO:0031974 membrane-enclosed lumen; GO:0031981 nuclear lumen; GO:0043226 organelle; GO:0043227 membrane-bounded organelle; GO:0043229 intracellular organelle; GO:0043231 intracellular membrane-bounded organelle; GO:0043233 organelle lumen; GO:0044422 organelle par…
A0A452EGY9	Fructose-bisphosphate aldolase(predicted) OS=Capra hircus OX=9925 GN=ALDOA PE=4 SV=1	0.253	Down	1.5923e-08	ALDOA	45.136	47.6	23	47	1	1.835	1.612	1.732	1.642	1.479	0.496	0.434	0.359	0.38	0.427	mitochondria	GO:0005975 carbohydrate metabolic process; GO:0006082 organic acid metabolic process; GO:0006090 pyruvate metabolic process; GO:0006091 generation of precursor metabolites and energy; GO:0006096 glycolytic process; GO:0006139 nucleobase-containing compound metabolic process; GO:0006163 purine nucleotide metabolic process; GO:0006164 purine nucleotide biosynthetic process; GO:0006165 nucleoside di…		GO:0003824 catalytic activity; GO:0004332 fructose-bisphosphate aldolase activity; GO:0016829 lyase activity; GO:0016830 carbon-carbon lyase activity; GO:0016832 aldehyde-lyase activity;				PF00274	Fructose-bisphosphate aldolase class-I
D1MGL8	L-lactate dehydrogenase OS=Capra hircus OX=9925 GN=LDH-A PE=2 SV=1	0.477	Down	0.003395	LDH-A	36.566	36.7	13	29	10	1.534	1.003	1.941	1.403	1.186	0.692	0.697	0.623	0.651	0.709	cytoplasm	GO:0000302 response to reactive oxygen species; GO:0001666 response to hypoxia; GO:0005975 carbohydrate metabolic process; GO:0005996 monosaccharide metabolic process; GO:0006006 glucose metabolic process; GO:0006007 glucose catabolic process; GO:0006082 organic acid metabolic process; GO:0006089 lactate metabolic process; GO:0006090 pyruvate metabolic process; GO:0006091 generation of precursor …	GO:0005622 intracellular; GO:0005623 cell; GO:0005737 cytoplasm; GO:0005829 cytosol; GO:0005929 cilium; GO:0031514 motile cilium; GO:0035686 sperm fibrous sheath; GO:0036126 sperm flagellum; GO:0042995 cell projection; GO:0043226 organelle; GO:0044422 organelle part; GO:0044424 intracellular part; GO:0044441 ciliary part; GO:0044444 cytoplasmic part; GO:0044463 cell projection part; GO:0044464 ce…	GO:0000166 nucleotide binding; GO:0003824 catalytic activity; GO:0004457 lactate dehydrogenase activity; GO:0004459 L-lactate dehydrogenase activity; GO:0005488 binding; GO:0005515 protein binding; GO:0016491 oxidoreductase activity; GO:0016614 oxidoreductase activity, acting on CH-OH group of donors; GO:0016616 oxidoreductase activity, acting on the CH-OH group of donors, NAD or NADP as acceptor…	K00016	LDH, ldh; L-lactate dehydrogenase [EC:1.1.1.27]	chx00010 Glycolysis / Gluconeogenesis - Capra hircus (goat); chx00270 Cysteine and methionine metabolism - Capra hircus (goat); chx00620 Pyruvate metabolism - Capra hircus (goat); chx00640 Propanoate metabolism - Capra hircus (goat); chx01100 Metabolic pathways - Capra hircus (goat); chx04066 HIF-1 signaling pathway - Capra hircus (goat); chx04922 Glucagon signaling pathway - Capra hircus (goat);…	PF02866	lactate/malate dehydrogenase, alpha/beta C-terminal domain
A0A452F9I5	C-X-C motif chemokine(predicted) OS=Capra hircus OX=9925 PE=4 SV=1	0.477	Down	0.00020317	---	10.132	60	6	27	6	1.331	0.995	1.793	1.533	1.188	0.737	0.687	0.66	0.547	0.629	extracellular	GO:0002237 response to molecule of bacterial origin; GO:0002376 immune system process; GO:0002520 immune system development; GO:0002682 regulation of immune system process; GO:0002684 positive regulation of immune system process; GO:0002685 regulation of leukocyte migration; GO:0002687 positive regulation of leukocyte migration; GO:0002688 regulation of leukocyte chemotaxis; GO:0002690 positive r…	GO:0005576 extracellular region; GO:0005615 extracellular space; GO:0044421 extracellular region part;	GO:0001664 G-protein coupled receptor binding; GO:0005102 receptor binding; GO:0005125 cytokine activity; GO:0005126 cytokine receptor binding; GO:0005488 binding; GO:0005515 protein binding; GO:0008009 chemokine activity; GO:0030545 receptor regulator activity; GO:0042379 chemokine receptor binding; GO:0045236 CXCR chemokine receptor binding; GO:0048018 receptor agonist activity; GO:0048248 CXCR…				PF00048	Small cytokines (intecrine/chemokine), interleukin-8 like
A0A452F1L3	Coiled-coil domain-containing protein 151(predicted) OS=Capra hircus OX=9925 GN=RGL3 PE=4 SV=1	0.521	Down	0.00044202	RGL3	71.267	3.4	2	2	2	1.739	1.375	0.991	1.533	1.216	0.621	0.68	0.696	0.875	0.696	cytoplasm	GO:0000226 microtubule cytoskeleton organization; GO:0001578 microtubule bundle formation; GO:0003341 cilium movement; GO:0006928 movement of cell or subcellular component; GO:0006996 organelle organization; GO:0007010 cytoskeleton organization; GO:0007017 microtubule-based process; GO:0007018 microtubule-based movement; GO:0007275 multicellular organism development; GO:0007368 determination of l…	GO:0005622 intracellular; GO:0005623 cell; GO:0005737 cytoplasm; GO:0005814 centriole; GO:0005815 microtubule organizing center; GO:0005856 cytoskeleton; GO:0005929 cilium; GO:0005930 axoneme; GO:0015630 microtubule cytoskeleton; GO:0032838 cell projection cytoplasm; GO:0036064 ciliary basal body; GO:0042995 cell projection; GO:0043226 organelle; GO:0043228 non-membrane-bounded organelle; GO:0043…		K23733
A0A452F334	Glycerol-3-phosphate dehydrogenase(predicted) OS=Capra hircus OX=9925 GN=GPD2 PE=4 SV=1	0.569	Down	0.020743	GPD2	80.811	13.8	9	12	9	1.545	0.852	1.988	1.421	0.9	0.576	0.763	0.879	0.685	0.911	mitochondria	GO:0001654 eye development; GO:0005975 carbohydrate metabolic process; GO:0005996 monosaccharide metabolic process; GO:0006006 glucose metabolic process; GO:0006066 alcohol metabolic process; GO:0006072 glycerol-3-phosphate metabolic process; GO:0006091 generation of precursor metabolites and energy; GO:0006094 gluconeogenesis; GO:0006116 NADH oxidation; GO:0006127 glycerophosphate shuttle; GO:00…	GO:0005622 intracellular; GO:0005623 cell; GO:0005737 cytoplasm; GO:0005739 mitochondrion; GO:0005740 mitochondrial envelope; GO:0005743 mitochondrial inner membrane; GO:0009331 glycerol-3-phosphate dehydrogenase complex; GO:0016020 membrane; GO:0019866 organelle inner membrane; GO:0031090 organelle membrane; GO:0031966 mitochondrial membrane; GO:0031967 organelle envelope; GO:0031975 envelope; G…	GO:0003824 catalytic activity; GO:0004367 glycerol-3-phosphate dehydrogenase [NAD+] activity; GO:0004368 glycerol-3-phosphate dehydrogenase activity; GO:0005488 binding; GO:0005509 calcium ion binding; GO:0016491 oxidoreductase activity; GO:0016614 oxidoreductase activity, acting on CH-OH group of donors; GO:0016616 oxidoreductase activity, acting on the CH-OH group of donors, NAD or NADP as acce…	K00111	glpA, glpD; glycerol-3-phosphate dehydrogenase [EC:1.1.5.3]	chx00564 Glycerophospholipid metabolism - Capra hircus (goat);	PF01266; PF13499	FAD dependent oxidoreductase; EF-hand domain pair
A0A452EJT9	KLKBL4 protein(predicted) OS=Capra hircus OX=9925 GN=PRSS54 PE=4 SV=1	0.381	Down	0.000140256	PRSS54	36.932	26	8	16	8	1.801	1.449	0.915	1.556	1.843	0.62	0.622	0.46	0.608	0.574	extracellular							PF00089	Trypsin
A0A452FJ33	CD44 antigen(predicted) OS=Capra hircus OX=9925 GN=CD44 PE=4 SV=1	0.646	Down	0.0024605	CD44	38.737	5.9	2	2	2	1.397	1.248	0.96	1.59	1.143	0.747	0.767	0.842	0.968	0.771	extracellular	GO:0000003 reproduction; GO:0000768 syncytium formation by plasma membrane fusion; GO:0001501 skeletal system development; GO:0001558 regulation of cell growth; GO:0001568 blood vessel development; GO:0001655 urogenital system development; GO:0001657 ureteric bud development; GO:0001658 branching involved in ureteric bud morphogenesis; GO:0001763 morphogenesis of a branching structure; GO:0001775…	GO:0005622 intracellular; GO:0005623 cell; GO:0005634 nucleus; GO:0005737 cytoplasm; GO:0005794 Golgi apparatus; GO:0005829 cytosol; GO:0005886 plasma membrane; GO:0005887 integral component of plasma membrane; GO:0005902 microvillus; GO:0009897 external side of plasma membrane; GO:0009986 cell surface; GO:0012505 endomembrane system; GO:0012506 vesicle membrane; GO:0016020 membrane; GO:0016021 i…	GO:0005102 receptor binding; GO:0005114 type II transforming growth factor beta receptor binding; GO:0005126 cytokine receptor binding; GO:0005154 epidermal growth factor receptor binding; GO:0005160 transforming growth factor beta receptor binding; GO:0005488 binding; GO:0005515 protein binding; GO:0005518 collagen binding; GO:0005539 glycosaminoglycan binding; GO:0005540 hyaluronic acid binding…	K06256	CD44; CD44 antigen	chx04512 ECM-receptor interaction - Capra hircus (goat); chx04640 Hematopoietic cell lineage - Capra hircus (goat); chx05169 Epstein-Barr virus infection - Capra hircus (goat); chx05205 Proteoglycans in cancer - Capra hircus (goat); chx05206 MicroRNAs in cancer - Capra hircus (goat);	PF00193	Extracellular link domain
A0A452EDH8	Dmx like 2(predicted) OS=Capra hircus OX=9925 GN=DMXL2 PE=4 SV=1	1.642	Up	0.0081752	DMXL2	340.28	10.4	28	29	27	0.768	0.747	0.835	0.748	0.75	0.977	1.71	1.248	1.309	1.076	nucleus	GO:0006873 cellular ion homeostasis; GO:0006885 regulation of pH; GO:0007035 vacuolar acidification; GO:0009987 cellular process; GO:0016043 cellular component organization; GO:0019725 cellular homeostasis; GO:0022607 cellular component assembly; GO:0030003 cellular cation homeostasis; GO:0030004 cellular monovalent inorganic cation homeostasis; GO:0030641 regulation of cellular pH; GO:0034622 ce…	GO:0005622 intracellular; GO:0005623 cell; GO:0005737 cytoplasm; GO:0008021 synaptic vesicle; GO:0012505 endomembrane system; GO:0030133 transport vesicle; GO:0031410 cytoplasmic vesicle; GO:0031982 vesicle; GO:0032991 macromolecular complex; GO:0043226 organelle; GO:0043227 membrane-bounded organelle; GO:0043229 intracellular organelle; GO:0043291 RAVE complex; GO:0044424 intracellular part; GO:…	GO:0005488 binding; GO:0005515 protein binding; GO:0017016 Ras GTPase binding; GO:0017137 Rab GTPase binding; GO:0019899 enzyme binding; GO:0031267 small GTPase binding; GO:0051020 GTPase binding;
A0A452FQC0	Cathelicidin (Fragment)(predicted) OS=Capra hircus OX=9925 GN=LOC102169231 PE=4 SV=1	0.574	Down	0.015441	LOC102169231	17.606	34.8	4	5	3	1.212	1.015	1.036	2.25	1.055	0.568	0.721	0.818	0.804	0.858	extracellular	GO:0001775 cell activation; GO:0001817 regulation of cytokine production; GO:0001819 positive regulation of cytokine production; GO:0001878 response to yeast; GO:0001906 cell killing; GO:0001932 regulation of protein phosphorylation; GO:0001934 positive regulation of protein phosphorylation; GO:0002227 innate immune response in mucosa; GO:0002251 organ or tissue specific immune response; GO:00022…	GO:0005576 extracellular region; GO:0005615 extracellular space; GO:0005622 intracellular; GO:0005623 cell; GO:0005737 cytoplasm; GO:0012505 endomembrane system; GO:0030141 secretory granule; GO:0031410 cytoplasmic vesicle; GO:0031974 membrane-enclosed lumen; GO:0031982 vesicle; GO:0031983 vesicle lumen; GO:0034774 secretory granule lumen; GO:0035580 specific granule lumen; GO:0042581 specific gr…		K13916	CAMP, LL37; cathelicidin antimicrobial peptide	chx04621 NOD-like receptor signaling pathway - Capra hircus (goat); chx04970 Salivary secretion - Capra hircus (goat); chx05150 Staphylococcus aureus infection - Capra hircus (goat); chx05152 Tuberculosis - Capra hircus (goat);	PF00666	Cathelicidin
A0A452EVH8	Proteasome (Prosome, macropain) 26S subunit, ATPase, 4, isoform CRA_b(predicted) OS=Capra hircus OX=9925 GN=PSMC4 PE=4 SV=1	1.883	Up	3.9268e-05	PSMC4	47.366	37.8	17	23	17	0.779	0.719	0.711	0.723	0.645	1.464	1.527	1.025	1.309	1.412	cytoplasm	GO:0001701 in utero embryonic development; GO:0001824 blastocyst development; GO:0006355 regulation of transcription, DNA-templated; GO:0006357 regulation of transcription from RNA polymerase II promoter; GO:0006464 cellular protein modification process; GO:0006508 proteolysis; GO:0006511 ubiquitin-dependent protein catabolic process; GO:0006807 nitrogen compound metabolic process; GO:0006950 res…	GO:0000502 proteasome complex; GO:0005622 intracellular; GO:0005623 cell; GO:0005634 nucleus; GO:0005654 nucleoplasm; GO:0005737 cytoplasm; GO:0005829 cytosol; GO:0005838 proteasome regulatory particle; GO:0008540 proteasome regulatory particle, base subcomplex; GO:0016234 inclusion body; GO:0022624 proteasome accessory complex; GO:0031595 nuclear proteasome complex; GO:0031597 cytosolic proteaso…	GO:0003824 catalytic activity; GO:0005488 binding; GO:0005515 protein binding; GO:0008134 transcription factor binding; GO:0016462 pyrophosphatase activity; GO:0016787 hydrolase activity; GO:0016817 hydrolase activity, acting on acid anhydrides; GO:0016818 hydrolase activity, acting on acid anhydrides, in phosphorus-containing anhydrides; GO:0016887 ATPase activity; GO:0017025 TBP-class protein b…	K03063	PSMC4, RPT3; 26S proteasome regulatory subunit T3	chx03050 Proteasome - Capra hircus (goat); chx05169 Epstein-Barr virus infection - Capra hircus (goat);	PF00004	ATPase family associated with various cellular activities (AAA)
A0A452G3N6	Septin 10(predicted) OS=Capra hircus OX=9925 GN=SEPT10 PE=4 SV=1	0.618	Down	0.003017	SEPT10	52.356	7.1	3	3	3	1.506	1.036	1.005	1.669	1.226	0.751	0.758	0.803	0.722	0.947	cytoplasm				K16940	SEPT10; septin 10		PF00735	Septin
A0A452FQ12	Anosmin-1 (Fragment)(predicted) OS=Capra hircus OX=9925 GN=ANOS1 PE=4 SV=1	1.61	Up	0.021176	ANOS1	69.645	5.2	2	2	2	0.844	0.67	1.086	0.88	0.542	1.057	0.897	1.634	1.285	1.603	nucleus				K23413			PF00095; PF00041	WAP-type (Whey Acidic Protein) 'four-disulfide core'; Fibronectin type III domain
A0A452EX74	A-kinase anchor protein 4 (Fragment)(predicted) OS=Capra hircus OX=9925 GN=AKAP4 PE=4 SV=1	0.391	Down	1.2032e-06	AKAP4	92.888	31	24	48	24	1.587	1.52	1.288	1.431	1.425	0.484	0.462	0.647	0.598	0.645	cytoplasm	GO:0000003 reproduction; GO:0006928 movement of cell or subcellular component; GO:0006996 organelle organization; GO:0007154 cell communication; GO:0007165 signal transduction; GO:0007166 cell surface receptor signaling pathway; GO:0007167 enzyme linked receptor protein signaling pathway; GO:0007178 transmembrane receptor protein serine/threonine kinase signaling pathway; GO:0007338 single fertil…	GO:0005622 intracellular; GO:0005623 cell; GO:0005737 cytoplasm; GO:0005856 cytoskeleton; GO:0005929 cilium; GO:0005952 cAMP-dependent protein kinase complex; GO:0030016 myofibril; GO:0030017 sarcomere; GO:0030018 Z disc; GO:0031514 motile cilium; GO:0031674 I band; GO:0032991 macromolecular complex; GO:0035686 sperm fibrous sheath; GO:0036126 sperm flagellum; GO:0042995 cell projection; GO:00432…	GO:0005488 binding; GO:0005515 protein binding; GO:0051018 protein kinase A binding;	K16521	AKAP4; A-kinase anchor protein 4
A0A452DMM6	Disintegrin and metalloproteinase domain-containing protein 32 (Fragment)(predicted) OS=Capra hircus OX=9925 GN=ADAM32 PE=4 SV=1	0.501	Down	2.1475e-05	ADAM32	83.32	19.8	15	21	15	1.591	1.099	1.318	1.562	1.293	0.71	0.738	0.59	0.687	0.71	plasma membrane				K16070	ADAM32; disintegrin and metalloproteinase domain-containing protein 32 [EC:3.4.24.-]		PF01421; PF00200	Reprolysin (M12B) family zinc metalloprotease ; Disintegrin
A0A452FTD0	Immunoglobulin lambda variable 3-10(predicted) OS=Capra hircus OX=9925 PE=4 SV=1	0.613	Down	0.0114638	---	18.763	27.5	5	7	5	0.889	1.64	1.469	0.932	1.437	0.642	0.824	0.953	0.715	0.771	extracellular							PF07686	Immunoglobulin V-set domain
A0A452FEJ8	T-complex protein 1 subunit delta(predicted) OS=Capra hircus OX=9925 PE=4 SV=1	1.783	Up	0.0026021	---	56.802	45.9	22	50	2	0.829	0.733	0.647	0.748	0.734	1.9	1.305	0.881	1.243	1.252	cytoplasm	GO:0000003 reproduction; GO:0006403 RNA localization; GO:0006457 protein folding; GO:0006458 'de novo' protein folding; GO:0006810 transport; GO:0007338 single fertilization; GO:0007339 binding of sperm to zona pellucida; GO:0008037 cell recognition; GO:0009566 fertilization; GO:0009889 regulation of biosynthetic process; GO:0009891 positive regulation of biosynthetic process; GO:0009893 positive…	GO:0002199 zona pellucida receptor complex; GO:0005622 intracellular; GO:0005623 cell; GO:0005634 nucleus; GO:0005654 nucleoplasm; GO:0005737 cytoplasm; GO:0005813 centrosome; GO:0005815 microtubule organizing center; GO:0005829 cytosol; GO:0005832 chaperonin-containing T-complex; GO:0005856 cytoskeleton; GO:0005874 microtubule; GO:0015630 microtubule cytoskeleton; GO:0031974 membrane-enclosed lu…	GO:0005488 binding; GO:0005515 protein binding; GO:0044183 protein binding involved in protein folding; GO:0051082 unfolded protein binding;	K09496	CCT4; T-complex protein 1 subunit delta
A0A452DR88	Transforming growth factor-beta-induced protein ig-h3(predicted) OS=Capra hircus OX=9925 GN=TGFBI PE=4 SV=1	0.651	Down	0.0055796	TGFBI	70.661	1.7	1	1	1	1.065	1.682	1.05	1.235	1.313	0.674	0.754	1.045	0.785	0.872	mitochondria	GO:0001525 angiogenesis; GO:0001568 blood vessel development; GO:0001944 vasculature development; GO:0003008 system process; GO:0006807 nitrogen compound metabolic process; GO:0007155 cell adhesion; GO:0007162 negative regulation of cell adhesion; GO:0007275 multicellular organism development; GO:0007600 sensory perception; GO:0007601 visual perception; GO:0008152 metabolic process; GO:0008283 ce…	GO:0005576 extracellular region; GO:0005604 basement membrane; GO:0005615 extracellular space; GO:0005622 intracellular; GO:0005623 cell; GO:0005737 cytoplasm; GO:0005794 Golgi apparatus; GO:0005802 trans-Golgi network; GO:0005886 plasma membrane; GO:0012505 endomembrane system; GO:0016020 membrane; GO:0031012 extracellular matrix; GO:0031984 organelle subcompartment; GO:0043226 organelle; GO:004…	GO:0005102 receptor binding; GO:0005178 integrin binding; GO:0005488 binding; GO:0005515 protein binding; GO:0005518 collagen binding; GO:0044877 macromolecular complex binding; GO:0050839 cell adhesion molecule binding; GO:0050840 extracellular matrix binding;	K19519	TGFBI, BIGH3; transforming growth factor-beta-induced protein		PF02469	Fasciclin domain
A0A452G6U9	spermatogenesis-associated protein 17(predicted) OS=Capra hircus OX=9925 GN=SPATA17 PE=4 SV=1	0.597	Down	0.0023638	SPATA17	43.266	2.8	1	1	1	1.737	1.179	1.006	1.341	1.276	0.581	0.839	0.898	0.774	0.809	nucleus
A0A452DTH7	Complement factor I(predicted) OS=Capra hircus OX=9925 GN=CFI PE=4 SV=1	0.412	Down	0.00135939	CFI	68.558	45	23	30	23	1.35	1.28	1.542	1.464	1.5	0.706	0.578	0.644	0.633	0.38	extracellular	GO:0002673 regulation of acute inflammatory response; GO:0002682 regulation of immune system process; GO:0002697 regulation of immune effector process; GO:0002920 regulation of humoral immune response; GO:0006508 proteolysis; GO:0006807 nitrogen compound metabolic process; GO:0008152 metabolic process; GO:0009987 cellular process; GO:0010033 response to organic substance; GO:0010468 regulation of…	GO:0005576 extracellular region; GO:0005615 extracellular space; GO:0005622 intracellular; GO:0005623 cell; GO:0005634 nucleus; GO:0043226 organelle; GO:0043227 membrane-bounded organelle; GO:0043229 intracellular organelle; GO:0043231 intracellular membrane-bounded organelle; GO:0044421 extracellular region part; GO:0044424 intracellular part; GO:0044464 cell part;	GO:0003824 catalytic activity; GO:0004175 endopeptidase activity; GO:0004252 serine-type endopeptidase activity; GO:0008233 peptidase activity; GO:0008236 serine-type peptidase activity; GO:0016787 hydrolase activity; GO:0017171 serine hydrolase activity; GO:0070011 peptidase activity, acting on L-amino acid peptides;	K01333	CFI; complement factor I [EC:3.4.21.45]	chx04610 Complement and coagulation cascades - Capra hircus (goat); chx05150 Staphylococcus aureus infection - Capra hircus (goat);	PF00530; PF00089	Scavenger receptor cysteine-rich domain; Trypsin
A0A452E4M4	dynein heavy chain 7, axonemal(predicted) OS=Capra hircus OX=9925 GN=DNAH7 PE=4 SV=1	0.518	Down	0.00024495	DNAH7	460.49	5	19	20	15	1.544	1.092	1.065	1.482	1.279	0.612	0.529	0.816	0.714	0.676	cytoplasm				K10408	DNAH; dynein heavy chain, axonemal	chx05016 Huntington disease - Capra hircus (goat);	PF12774; PF12775; PF12780; PF12777; PF12781; PF03028	Hydrolytic ATP binding site of dynein motor region D1; P-loop containing dynein motor region D3; P-loop containing dynein motor region D4; Microtubule-binding stalk of dynein motor; ATP-binding dynein motor region D5; Dynein heavy chain and region D6 of dynein motor
I1W1N4	Ras-related protein Rab-11B OS=Capra hircus OX=9925 GN=RAB11B PE=2 SV=1	1.733	Up	0.0033388	RAB11B	24.488	56	11	21	11	0.75	0.789	0.756	0.776	0.728	1.362	1.59	1.067	1.063	1.503	cytoskeleton	GO:0000041 transition metal ion transport; GO:0001678 cellular glucose homeostasis; GO:0001881 receptor recycling; GO:0002790 peptide secretion; GO:0006464 cellular protein modification process; GO:0006807 nitrogen compound metabolic process; GO:0006810 transport; GO:0006811 ion transport; GO:0006812 cation transport; GO:0006826 iron ion transport; GO:0006887 exocytosis; GO:0007154 cell communica…	GO:0005622 intracellular; GO:0005623 cell; GO:0005737 cytoplasm; GO:0005768 endosome; GO:0005829 cytosol; GO:0008021 synaptic vesicle; GO:0010008 endosome membrane; GO:0012505 endomembrane system; GO:0012506 vesicle membrane; GO:0016020 membrane; GO:0030133 transport vesicle; GO:0030139 endocytic vesicle; GO:0030658 transport vesicle membrane; GO:0030659 cytoplasmic vesicle membrane; GO:0030672 s…	GO:0000166 nucleotide binding; GO:0001882 nucleoside binding; GO:0001883 purine nucleoside binding; GO:0003824 catalytic activity; GO:0003924 GTPase activity; GO:0005488 binding; GO:0005515 protein binding; GO:0005525 GTP binding; GO:0008092 cytoskeletal protein binding; GO:0016462 pyrophosphatase activity; GO:0016787 hydrolase activity; GO:0016817 hydrolase activity, acting on acid anhydrides; G…	K07905	RAB11B; Ras-related protein Rab-11B	chx04144 Endocytosis - Capra hircus (goat); chx04152 AMPK signaling pathway - Capra hircus (goat); chx04962 Vasopressin-regulated water reabsorption - Capra hircus (goat); chx05164 Influenza A - Capra hircus (goat);	PF00071	Ras family
A0A452EAI1	Izumo sperm-egg fusion protein 4 (Fragment)(predicted) OS=Capra hircus OX=9925 GN=IZUMO4 PE=4 SV=1	0.44	Down	0.0036238	IZUMO4	24.079	27.8	6	27	6	1.921	1.387	0.904	1.61	1.326	0.584	0.604	0.684	0.68	0.591	extracellular		GO:0005622 intracellular; GO:0005623 cell; GO:0005634 nucleus; GO:0043226 organelle; GO:0043227 membrane-bounded organelle; GO:0043229 intracellular organelle; GO:0043231 intracellular membrane-bounded organelle; GO:0044424 intracellular part; GO:0044464 cell part;
A0A452FVN8	Brefeldin A-inhibited guanine nucleotide-exchange protein 2(predicted) OS=Capra hircus OX=9925 GN=ARFGEF2 PE=4 SV=1	1.915	Up	0.00118395	ARFGEF2	202.16	8.4	15	17	8	0.7	0.677	0.733	0.786	0.622	1.25	2.077	1.146	1.04	1.225	cytoplasm	GO:0001817 regulation of cytokine production; GO:0001819 positive regulation of cytokine production; GO:0001881 receptor recycling; GO:0006810 transport; GO:0006887 exocytosis; GO:0006892 post-Golgi vesicle-mediated transport; GO:0006893 Golgi to plasma membrane transport; GO:0006996 organelle organization; GO:0007032 endosome organization; GO:0007154 cell communication; GO:0007165 signal transdu…	GO:0000139 Golgi membrane; GO:0005622 intracellular; GO:0005623 cell; GO:0005737 cytoplasm; GO:0005768 endosome; GO:0005794 Golgi apparatus; GO:0005802 trans-Golgi network; GO:0005815 microtubule organizing center; GO:0005829 cytosol; GO:0005856 cytoskeleton; GO:0005874 microtubule; GO:0005879 axonemal microtubule; GO:0005881 cytoplasmic microtubule; GO:0005929 cilium; GO:0005930 axoneme; GO:0012…	GO:0005085 guanyl-nucleotide exchange factor activity; GO:0005086 ARF guanyl-nucleotide exchange factor activity; GO:0005102 receptor binding; GO:0005488 binding; GO:0005515 protein binding; GO:0008092 cytoskeletal protein binding; GO:0017022 myosin binding; GO:0019899 enzyme binding; GO:0034237 protein kinase A regulatory subunit binding; GO:0050811 GABA receptor binding; GO:0051018 protein kina…	K18442	ARFGEF, BIG; brefeldin A-inhibited guanine nucleotide-exchange protein	chx04144 Endocytosis - Capra hircus (goat);	PF12783; PF01369	Guanine nucleotide exchange factor in Golgi transport N-terminal; Sec7 domain
A0A452FJ99	Growth arrest-specific protein 8 (Fragment)(predicted) OS=Capra hircus OX=9925 GN=GAS8 PE=4 SV=1	0.43	Down	0.005019	GAS8	56.193	2.3	1	1	1	2.221	1.102	0.926	2.029	1.008	0.429	0.702	0.658	0.641	0.7	nucleus	GO:0000226 microtubule cytoskeleton organization; GO:0001539 cilium or flagellum-dependent cell motility; GO:0001578 microtubule bundle formation; GO:0003341 cilium movement; GO:0003351 epithelial cilium movement; GO:0006928 movement of cell or subcellular component; GO:0006996 organelle organization; GO:0007010 cytoskeleton organization; GO:0007017 microtubule-based process; GO:0007018 microtubu…	GO:0005622 intracellular; GO:0005623 cell; GO:0005737 cytoplasm; GO:0005794 Golgi apparatus; GO:0005815 microtubule organizing center; GO:0005856 cytoskeleton; GO:0005874 microtubule; GO:0005929 cilium; GO:0005930 axoneme; GO:0012505 endomembrane system; GO:0015630 microtubule cytoskeleton; GO:0031514 motile cilium; GO:0032838 cell projection cytoplasm; GO:0036064 ciliary basal body; GO:0036126 s…	GO:0005488 binding; GO:0005515 protein binding; GO:0008017 microtubule binding; GO:0008092 cytoskeletal protein binding; GO:0015631 tubulin binding; GO:0017016 Ras GTPase binding; GO:0017137 Rab GTPase binding; GO:0019899 enzyme binding; GO:0031267 small GTPase binding; GO:0051020 GTPase binding;	K19942	GAS8; growth arrest-specific protein 8
A0A452EWS3	carboxypeptidase A5 isoform X2(predicted) OS=Capra hircus OX=9925 GN=CPA5 PE=4 SV=1	0.398	Down	4.7591e-07	CPA5	51.489	10.7	6	7	6	1.539	1.493	1.58	1.358	1.531	0.516	0.514	0.593	0.718	0.644	extracellular	GO:0006508 proteolysis; GO:0006807 nitrogen compound metabolic process; GO:0008152 metabolic process; GO:0019538 protein metabolic process; GO:0043170 macromolecule metabolic process; GO:0044238 primary metabolic process; GO:0071704 organic substance metabolic process; GO:1901564 organonitrogen compound metabolic process;	GO:0005576 extracellular region; GO:0005615 extracellular space; GO:0044421 extracellular region part;	GO:0003824 catalytic activity; GO:0004180 carboxypeptidase activity; GO:0004181 metallocarboxypeptidase activity; GO:0008233 peptidase activity; GO:0008235 metalloexopeptidase activity; GO:0008237 metallopeptidase activity; GO:0008238 exopeptidase activity; GO:0016787 hydrolase activity; GO:0070011 peptidase activity, acting on L-amino acid peptides;	K08781	CPA5; carboxypeptidase A5 [EC:3.4.17.1]		PF02244; PF00246	Carboxypeptidase activation peptide; Zinc carboxypeptidase
A0A452FCA4	Leucine-rich repeat and coiled-coil domain-containing protein 1 (Fragment)(predicted) OS=Capra hircus OX=9925 GN=LRRCC1 PE=4 SV=1	0.525	Down	0.037575	LRRCC1	118.73	0.9	1	1	1	1.588	0.743	1.602	1.993	0.946	0.657	0.742	0.855	0.711	0.643	cytoplasm				K16475	LRRCC1, CLERC; leucine-rich repeat and coiled-coil domain-containing protein 1
A0A452FSW6	Family with sequence similarity 62 (C2 domain containing), member A(predicted) OS=Capra hircus OX=9925 GN=ESYT1 PE=4 SV=1	0.626	Down	0.00112499	ESYT1	120.09	2.3	2	2	2	1.245	1.076	1.259	1.722	1.126	0.752	0.839	0.828	0.898	0.704	cytoplasm		GO:0005622 intracellular; GO:0005623 cell; GO:0005737 cytoplasm; GO:0005783 endoplasmic reticulum; GO:0005789 endoplasmic reticulum membrane; GO:0005886 plasma membrane; GO:0012505 endomembrane system; GO:0016020 membrane; GO:0016021 integral component of membrane; GO:0030176 integral component of endoplasmic reticulum membrane; GO:0031224 intrinsic component of membrane; GO:0031227 intrinsic com…	GO:0005488 binding; GO:0005515 protein binding; GO:0042802 identical protein binding;				PF00168	C2 domain
A0A452E0Z2	Glyceraldehyde-3-phosphate dehydrogenase(predicted) OS=Capra hircus OX=9925 GN=GAPDHS PE=4 SV=1	0.322	Down	9.4939e-07	GAPDHS	41.963	53.5	19	65	17	1.552	1.421	1.891	1.463	1.298	0.381	0.477	0.506	0.576	0.517	cytoplasm	GO:0000003 reproduction; GO:0003006 developmental process involved in reproduction; GO:0005975 carbohydrate metabolic process; GO:0005996 monosaccharide metabolic process; GO:0006006 glucose metabolic process; GO:0006007 glucose catabolic process; GO:0006082 organic acid metabolic process; GO:0006090 pyruvate metabolic process; GO:0006091 generation of precursor metabolites and energy; GO:0006094…	GO:0001669 acrosomal vesicle; GO:0005622 intracellular; GO:0005623 cell; GO:0005737 cytoplasm; GO:0005829 cytosol; GO:0005929 cilium; GO:0012505 endomembrane system; GO:0030141 secretory granule; GO:0031410 cytoplasmic vesicle; GO:0031514 motile cilium; GO:0031982 vesicle; GO:0035686 sperm fibrous sheath; GO:0036126 sperm flagellum; GO:0042995 cell projection; GO:0043226 organelle; GO:0043227 mem…	GO:0003824 catalytic activity; GO:0004365 glyceraldehyde-3-phosphate dehydrogenase (NAD+) (phosphorylating) activity; GO:0016491 oxidoreductase activity; GO:0016620 oxidoreductase activity, acting on the aldehyde or oxo group of donors, NAD or NADP as acceptor; GO:0016903 oxidoreductase activity, acting on the aldehyde or oxo group of donors; GO:0043891 glyceraldehyde-3-phosphate dehydrogenase (N…	K10705	GAPDHS; glyceraldehyde-3-phosphate dehydrogenase, spermatogenic [EC:1.2.1.12]	chx00010 Glycolysis / Gluconeogenesis - Capra hircus (goat); chx01100 Metabolic pathways - Capra hircus (goat);	PF00044; PF02800	Glyceraldehyde 3-phosphate dehydrogenase, NAD binding domain; Glyceraldehyde 3-phosphate dehydrogenase, C-terminal domain
A0A452DTL0	2-oxoglutarate dehydrogenase, mitochondrial(predicted) OS=Capra hircus OX=9925 GN=OGDH PE=4 SV=1	0.63	Down	0.0161818	OGDH	115.51	25.3	25	30	25	1.573	0.962	1.191	1.497	1.018	0.597	0.917	0.682	0.627	1.111	mitochondria	GO:0006082 organic acid metabolic process; GO:0006091 generation of precursor metabolites and energy; GO:0006099 tricarboxylic acid cycle; GO:0006101 citrate metabolic process; GO:0006103 2-oxoglutarate metabolic process; GO:0006104 succinyl-CoA metabolic process; GO:0006139 nucleobase-containing compound metabolic process; GO:0006163 purine nucleotide metabolic process; GO:0006464 cellular prote…	GO:0005622 intracellular; GO:0005623 cell; GO:0005634 nucleus; GO:0005737 cytoplasm; GO:0005739 mitochondrion; GO:0032991 macromolecular complex; GO:0043226 organelle; GO:0043227 membrane-bounded organelle; GO:0043229 intracellular organelle; GO:0043231 intracellular membrane-bounded organelle; GO:0044424 intracellular part; GO:0044444 cytoplasmic part; GO:0044464 cell part; GO:0045239 tricarboxy…	GO:0003824 catalytic activity; GO:0004591 oxoglutarate dehydrogenase (succinyl-transferring) activity; GO:0005488 binding; GO:0016491 oxidoreductase activity; GO:0016624 oxidoreductase activity, acting on the aldehyde or oxo group of donors, disulfide as acceptor; GO:0016903 oxidoreductase activity, acting on the aldehyde or oxo group of donors; GO:0019842 vitamin binding; GO:0030976 thiamine pyr…	K00164	OGDH, sucA; 2-oxoglutarate dehydrogenase E1 component [EC:1.2.4.2]	chx00020 Citrate cycle (TCA cycle) - Capra hircus (goat); chx01100 Metabolic pathways - Capra hircus (goat); chx01200 Carbon metabolism - Capra hircus (goat);	PF02779	Transketolase, pyrimidine binding domain
F2X044	Lysozyme-like 4 OS=Capra hircus OX=9925 GN=LYZL4 PE=2 SV=1	0.603	Down	0.0027198	LYZL4	16.365	47.6	7	21	7	1.553	1.36	0.875	1.31	1.351	0.782	0.668	0.697	0.771	0.968	extracellular	GO:0000003 reproduction; GO:0006950 response to stress; GO:0006952 defense response; GO:0008152 metabolic process; GO:0009056 catabolic process; GO:0009566 fertilization; GO:0009605 response to external stimulus; GO:0009607 response to biotic stimulus; GO:0009617 response to bacterium; GO:0009987 cellular process; GO:0016998 cell wall macromolecule catabolic process; GO:0019953 sexual reproductio…	GO:0001669 acrosomal vesicle; GO:0005576 extracellular region; GO:0005615 extracellular space; GO:0005622 intracellular; GO:0005623 cell; GO:0005737 cytoplasm; GO:0005929 cilium; GO:0012505 endomembrane system; GO:0030141 secretory granule; GO:0031410 cytoplasmic vesicle; GO:0031514 motile cilium; GO:0031982 vesicle; GO:0036126 sperm flagellum; GO:0042995 cell projection; GO:0043226 organelle; GO…	GO:0003796 lysozyme activity; GO:0003824 catalytic activity; GO:0004553 hydrolase activity, hydrolyzing O-glycosyl compounds; GO:0016787 hydrolase activity; GO:0016798 hydrolase activity, acting on glycosyl bonds; GO:0061783 peptidoglycan muralytic activity;				PF00062	C-type lysozyme/alpha-lactalbumin family
A0A452E968	T-complex protein 1 subunit gamma (Fragment)(predicted) OS=Capra hircus OX=9925 GN=CCT3 PE=4 SV=1	1.642	Up	0.0032593	CCT3	60.585	64.2	36	108	36	0.787	0.796	0.656	0.844	0.776	1.755	1.206	0.92	1.112	1.342	mitochondria	GO:0000003 reproduction; GO:0006457 protein folding; GO:0006458 'de novo' protein folding; GO:0006810 transport; GO:0007338 single fertilization; GO:0007339 binding of sperm to zona pellucida; GO:0008037 cell recognition; GO:0009566 fertilization; GO:0009889 regulation of biosynthetic process; GO:0009891 positive regulation of biosynthetic process; GO:0009893 positive regulation of metabolic proc…	GO:0002199 zona pellucida receptor complex; GO:0005622 intracellular; GO:0005623 cell; GO:0005737 cytoplasm; GO:0005829 cytosol; GO:0005832 chaperonin-containing T-complex; GO:0005856 cytoskeleton; GO:0005874 microtubule; GO:0005886 plasma membrane; GO:0015630 microtubule cytoskeleton; GO:0016020 membrane; GO:0032991 macromolecular complex; GO:0043209 myelin sheath; GO:0043226 organelle; GO:00432…	GO:0005488 binding; GO:0005515 protein binding; GO:0044183 protein binding involved in protein folding; GO:0051082 unfolded protein binding;	K09495	CCT3, TRIC5; T-complex protein 1 subunit gamma
A0A060INS8	Cathepsin H OS=Capra hircus OX=9925 GN=CTSH PE=2 SV=1	1.625	Up	0.000662	CTSH	37.387	15.8	5	5	5	0.801	0.87	0.694	0.695	0.916	1.607	1.171	1.171	1.401	1.11	extracellular	GO:0000003 reproduction; GO:0000165 MAPK cascade; GO:0001101 response to acid chemical; GO:0001655 urogenital system development; GO:0001656 metanephros development; GO:0001763 morphogenesis of a branching structure; GO:0001775 cell activation; GO:0001822 kidney development; GO:0001894 tissue homeostasis; GO:0001906 cell killing; GO:0001909 leukocyte mediated cytotoxicity; GO:0001913 T cell media…	GO:0000323 lytic vacuole; GO:0001520 outer dense fiber; GO:0001669 acrosomal vesicle; GO:0005576 extracellular region; GO:0005615 extracellular space; GO:0005622 intracellular; GO:0005623 cell; GO:0005737 cytoplasm; GO:0005764 lysosome; GO:0005768 endosome; GO:0005770 late endosome; GO:0005771 multivesicular body; GO:0005773 vacuole; GO:0005829 cytosol; GO:0005856 cytoskeleton; GO:0005929 cilium;…	GO:0003824 catalytic activity; GO:0004175 endopeptidase activity; GO:0004177 aminopeptidase activity; GO:0004197 cysteine-type endopeptidase activity; GO:0004252 serine-type endopeptidase activity; GO:0004888 transmembrane signaling receptor activity; GO:0005488 binding; GO:0005515 protein binding; GO:0008047 enzyme activator activity; GO:0008233 peptidase activity; GO:0008234 cysteine-type pepti…	K01366	CTSH; cathepsin H [EC:3.4.22.16]	chx04142 Lysosome - Capra hircus (goat); chx04210 Apoptosis - Capra hircus (goat);	PF08246; PF00112	Cathepsin propeptide inhibitor domain (I29); Papain family cysteine protease
A0A452F4R1	Dynein heavy chain 2, axonemal (Fragment)(predicted) OS=Capra hircus OX=9925 GN=DNAH2 PE=4 SV=1	0.409	Down	0.0064397	DNAH2	501.93	1.5	5	5	4	1.785	0.882	1.428	2.452	0.847	0.449	0.744	0.516	0.733	0.585	plasma membrane				K10408	DNAH; dynein heavy chain, axonemal	chx05016 Huntington disease - Capra hircus (goat);	PF12774; PF12775; PF12780; PF12777; PF12781; PF03028	Hydrolytic ATP binding site of dynein motor region D1; P-loop containing dynein motor region D3; P-loop containing dynein motor region D4; Microtubule-binding stalk of dynein motor; ATP-binding dynein motor region D5; Dynein heavy chain and region D6 of dynein motor
A0A452G6H8	Phospholipid-transporting ATPase(predicted) OS=Capra hircus OX=9925 GN=LOC102178625 PE=4 SV=1	0.584	Down	1.8071e-05	LOC102178625	130.65	1.8	2	2	2	1.394	1.131	1.272	1.486	1.312	0.704	0.709	0.827	0.832	0.781	plasma membrane				K01530	E3.6.3.1; phospholipid-translocating ATPase [EC:3.6.3.1]
A0A452DPC8	WAP four-disulfide core domain protein 5(predicted) OS=Capra hircus OX=9925 GN=WFDC5 PE=4 SV=1	0.627	Down	0.020735	WFDC5	12.678	28	3	3	3	1.616	1.051	1.023	1.752	0.963	0.973	0.782	0.655	0.978	0.629	extracellular				K23639			PF00095	WAP-type (Whey Acidic Protein) 'four-disulfide core'
A0A452EV48	F-box and leucine-rich repeat protein 4(predicted) OS=Capra hircus OX=9925 GN=FBXL4 PE=4 SV=1	0.632	Down	0.00119796	FBXL4	67.762	1.7	1	1	1	1.046	1.31	1.654	1.165	1.254	0.719	0.793	0.979	0.763	0.812	mitochondria	GO:0000209 protein polyubiquitination; GO:0006464 cellular protein modification process; GO:0006508 proteolysis; GO:0006511 ubiquitin-dependent protein catabolic process; GO:0006807 nitrogen compound metabolic process; GO:0008152 metabolic process; GO:0009056 catabolic process; GO:0009057 macromolecule catabolic process; GO:0009987 cellular process; GO:0016567 protein ubiquitination; GO:0019538 p…	GO:0000151 ubiquitin ligase complex; GO:0005622 intracellular; GO:0005623 cell; GO:0005634 nucleus; GO:0005654 nucleoplasm; GO:0005737 cytoplasm; GO:0005739 mitochondrion; GO:0005740 mitochondrial envelope; GO:0005758 mitochondrial intermembrane space; GO:0005829 cytosol; GO:0016604 nuclear body; GO:0016607 nuclear speck; GO:0031967 organelle envelope; GO:0031970 organelle envelope lumen; GO:0031…	GO:0003824 catalytic activity; GO:0004842 ubiquitin-protein transferase activity; GO:0016740 transferase activity; GO:0019787 ubiquitin-like protein transferase activity;	K10270	FBXL4; F-box and leucine-rich repeat protein 4		PF00646	F-box domain
A0A452F3U3	T-complex protein 1 subunit epsilon(predicted) OS=Capra hircus OX=9925 GN=CCT5 PE=4 SV=1	1.772	Up	0.0121383	CCT5	59.628	62.8	39	106	39	0.751	0.794	0.673	0.784	0.717	1.863	1.318	0.903	1.102	1.404	cytoplasm				K09497	CCT5; T-complex protein 1 subunit epsilon
A0A452F0S7	Inactive serine/threonine-protein kinase VRK3(predicted) OS=Capra hircus OX=9925 GN=VRK3 PE=4 SV=1	0.437	Down	0.00026403	VRK3	48.531	2.5	1	1	1	1.195	1.235	1.52	1.757	1.557	0.844	0.657	0.485	0.723	0.463	nucleus	GO:0001932 regulation of protein phosphorylation; GO:0001933 negative regulation of protein phosphorylation; GO:0006464 cellular protein modification process; GO:0006468 protein phosphorylation; GO:0006793 phosphorus metabolic process; GO:0006796 phosphate-containing compound metabolic process; GO:0006807 nitrogen compound metabolic process; GO:0008152 metabolic process; GO:0008360 regulation of …	GO:0005622 intracellular; GO:0005623 cell; GO:0005634 nucleus; GO:0005730 nucleolus; GO:0005737 cytoplasm; GO:0031974 membrane-enclosed lumen; GO:0031981 nuclear lumen; GO:0043226 organelle; GO:0043227 membrane-bounded organelle; GO:0043228 non-membrane-bounded organelle; GO:0043229 intracellular organelle; GO:0043231 intracellular membrane-bounded organelle; GO:0043232 intracellular non-membrane…	GO:0003824 catalytic activity; GO:0004672 protein kinase activity; GO:0004674 protein serine/threonine kinase activity; GO:0005488 binding; GO:0005515 protein binding; GO:0016301 kinase activity; GO:0016740 transferase activity; GO:0016772 transferase activity, transferring phosphorus-containing groups; GO:0016773 phosphotransferase activity, alcohol group as acceptor; GO:0019899 enzyme binding; …	K08816	VRK; vaccinia related kinase [EC:2.7.11.1]		PF13240; PF00069	zinc-ribbon domain; Protein kinase domain
A0A452EAV4	Transmembrane protease serine 7(predicted) OS=Capra hircus OX=9925 GN=TMPRSS7 PE=4 SV=1	0.545	Down	1.76094e-05	TMPRSS7	92.979	1	1	1	1	1.275	1.401	1.254	1.324	1.487	0.712	0.75	0.608	0.725	0.876	plasma membrane	GO:0006508 proteolysis; GO:0006807 nitrogen compound metabolic process; GO:0008152 metabolic process; GO:0019538 protein metabolic process; GO:0043170 macromolecule metabolic process; GO:0044238 primary metabolic process; GO:0071704 organic substance metabolic process; GO:1901564 organonitrogen compound metabolic process;	GO:0005623 cell; GO:0005886 plasma membrane; GO:0016020 membrane; GO:0044464 cell part; GO:0071944 cell periphery;	GO:0003824 catalytic activity; GO:0008233 peptidase activity; GO:0008236 serine-type peptidase activity; GO:0016787 hydrolase activity; GO:0017171 serine hydrolase activity; GO:0070011 peptidase activity, acting on L-amino acid peptides;	K09638	TMPRSS7; transmembrane protease serine 7 [EC:3.4.21.-]		PF00431; PF00089	CUB domain; Trypsin
A0A452ENQ2	Ubiquitin like modifier activating enzyme 3(predicted) OS=Capra hircus OX=9925 GN=UBA3 PE=4 SV=1	1.528	Up	4.0353e-05	UBA3	52.818	28.2	9	13	9	0.818	0.837	0.759	0.836	0.812	1.25	1.409	1.078	1.141	1.329	mitochondria	GO:0000278 mitotic cell cycle; GO:0006355 regulation of transcription, DNA-templated; GO:0006464 cellular protein modification process; GO:0006508 proteolysis; GO:0006807 nitrogen compound metabolic process; GO:0007049 cell cycle; GO:0007113 endomitotic cell cycle; GO:0008152 metabolic process; GO:0009889 regulation of biosynthetic process; GO:0009890 negative regulation of biosynthetic process; …	GO:0005622 intracellular; GO:0005623 cell; GO:0005634 nucleus; GO:0005737 cytoplasm; GO:0005829 cytosol; GO:0043226 organelle; GO:0043227 membrane-bounded organelle; GO:0043229 intracellular organelle; GO:0043231 intracellular membrane-bounded organelle; GO:0044424 intracellular part; GO:0044444 cytoplasmic part; GO:0044464 cell part;	GO:0003824 catalytic activity; GO:0005102 receptor binding; GO:0005488 binding; GO:0005515 protein binding; GO:0008134 transcription factor binding; GO:0008641 small protein activating enzyme activity; GO:0016740 transferase activity; GO:0016874 ligase activity; GO:0016877 ligase activity, forming carbon-sulfur bonds; GO:0016922 ligand-dependent nuclear receptor binding; GO:0019781 NEDD8 activati…	K10686	UBE1C, UBA3; ubiquitin-activating enzyme E1 C [EC:6.2.1.45]	chx04120 Ubiquitin mediated proteolysis - Capra hircus (goat);	PF00899; PF08825	ThiF family; E2 binding domain
A0A452E104	Phosphoglycerate kinase(predicted) OS=Capra hircus OX=9925 GN=PGK1 PE=4 SV=1	1.502	Up	0.022004	PGK1	44.565	69.1	28	72	18	0.745	0.941	0.7	0.811	0.969	1.711	1.37	0.833	1.076	1.266	cytoplasm							PF00162	Phosphoglycerate kinase
P82018	Cathelicidin-2 OS=Capra hircus OX=9925 GN=CATHL2 PE=1 SV=1	0.448	Down	0.048097	CATHL2	19.846	19.3	3	3	2	1.637	0.938	0.81	2.881	0.935	0.704	0.514	0.701	0.636	0.67	extracellular	GO:0001775 cell activation; GO:0001817 regulation of cytokine production; GO:0001819 positive regulation of cytokine production; GO:0001878 response to yeast; GO:0001906 cell killing; GO:0001932 regulation of protein phosphorylation; GO:0001934 positive regulation of protein phosphorylation; GO:0002227 innate immune response in mucosa; GO:0002251 organ or tissue specific immune response; GO:00022…	GO:0005576 extracellular region; GO:0005615 extracellular space; GO:0005622 intracellular; GO:0005623 cell; GO:0005737 cytoplasm; GO:0012505 endomembrane system; GO:0030141 secretory granule; GO:0031410 cytoplasmic vesicle; GO:0031974 membrane-enclosed lumen; GO:0031982 vesicle; GO:0031983 vesicle lumen; GO:0034774 secretory granule lumen; GO:0035580 specific granule lumen; GO:0042581 specific gr…		K13916	CAMP, LL37; cathelicidin antimicrobial peptide	chx04621 NOD-like receptor signaling pathway - Capra hircus (goat); chx04970 Salivary secretion - Capra hircus (goat); chx05150 Staphylococcus aureus infection - Capra hircus (goat); chx05152 Tuberculosis - Capra hircus (goat);	PF00666	Cathelicidin
A0A452EAG5	Brefeldin A-inhibited guanine nucleotide-exchange protein 1(predicted) OS=Capra hircus OX=9925 GN=ARFGEF1 PE=4 SV=1	1.846	Up	0.00046063	ARFGEF1	208.77	10.1	17	21	10	0.819	0.657	0.687	0.876	0.661	1.355	1.804	1.269	1.042	1.359	cytoplasm	GO:0006810 transport; GO:0006887 exocytosis; GO:0006996 organelle organization; GO:0007030 Golgi organization; GO:0007275 multicellular organism development; GO:0007399 nervous system development; GO:0008064 regulation of actin polymerization or depolymerization; GO:0009889 regulation of biosynthetic process; GO:0009891 positive regulation of biosynthetic process; GO:0009893 positive regulation o…	GO:0000139 Golgi membrane; GO:0005622 intracellular; GO:0005623 cell; GO:0005634 nucleus; GO:0005654 nucleoplasm; GO:0005730 nucleolus; GO:0005737 cytoplasm; GO:0005794 Golgi apparatus; GO:0005802 trans-Golgi network; GO:0005829 cytosol; GO:0012505 endomembrane system; GO:0016020 membrane; GO:0016363 nuclear matrix; GO:0030532 small nuclear ribonucleoprotein complex; GO:0031090 organelle membrane…	GO:0005085 guanyl-nucleotide exchange factor activity; GO:0005086 ARF guanyl-nucleotide exchange factor activity; GO:0005488 binding; GO:0005515 protein binding; GO:0008092 cytoskeletal protein binding; GO:0017022 myosin binding; GO:0019899 enzyme binding; GO:0034237 protein kinase A regulatory subunit binding; GO:0051018 protein kinase A binding; GO:0051020 GTPase binding; GO:0098772 molecular f…	K18442	ARFGEF, BIG; brefeldin A-inhibited guanine nucleotide-exchange protein	chx04144 Endocytosis - Capra hircus (goat);	PF12783; PF01369	Guanine nucleotide exchange factor in Golgi transport N-terminal; Sec7 domain
A0A452E398	Phosphatidylinositol 5-phosphate 4-kinase type-2 gamma(predicted) OS=Capra hircus OX=9925 GN=PIP4K2C PE=4 SV=1	1.615	Up	0.0042974	PIP4K2C	47.14	5.9	3	3	3	0.82	0.825	0.773	0.818	0.739	1.141	1.316	1.127	1.145	1.689	mitochondria	GO:0006629 lipid metabolic process; GO:0006644 phospholipid metabolic process; GO:0006650 glycerophospholipid metabolic process; GO:0006661 phosphatidylinositol biosynthetic process; GO:0006793 phosphorus metabolic process; GO:0006796 phosphate-containing compound metabolic process; GO:0008152 metabolic process; GO:0008610 lipid biosynthetic process; GO:0008654 phospholipid biosynthetic process; …	GO:0005622 intracellular; GO:0005623 cell; GO:0005737 cytoplasm; GO:0005773 vacuole; GO:0005776 autophagosome; GO:0005783 endoplasmic reticulum; GO:0005829 cytosol; GO:0012505 endomembrane system; GO:0016020 membrane; GO:0043226 organelle; GO:0043227 membrane-bounded organelle; GO:0043229 intracellular organelle; GO:0043231 intracellular membrane-bounded organelle; GO:0044424 intracellular part; …	GO:0003824 catalytic activity; GO:0005488 binding; GO:0005515 protein binding; GO:0016301 kinase activity; GO:0016307 phosphatidylinositol phosphate kinase activity; GO:0016308 1-phosphatidylinositol-4-phosphate 5-kinase activity; GO:0016309 1-phosphatidylinositol-5-phosphate 4-kinase activity; GO:0016740 transferase activity; GO:0016772 transferase activity, transferring phosphorus-containing gr…	K00920	PIP4K2; 1-phosphatidylinositol-5-phosphate 4-kinase [EC:2.7.1.149]	chx00562 Inositol phosphate metabolism - Capra hircus (goat); chx01100 Metabolic pathways - Capra hircus (goat); chx04070 Phosphatidylinositol signaling system - Capra hircus (goat); chx04810 Regulation of actin cytoskeleton - Capra hircus (goat);
A0A452EYI5	Mediator of RNA polymerase II transcription subunit 21(predicted) OS=Capra hircus OX=9925 GN=MED21 PE=4 SV=1	2.135	Up	0.0034378	MED21	15.521	4.9	1	1	1	0.894	0.559	0.453	0.903	0.488	1.143	1.922	0.983	1.549	1.442	cytoplasm,nucleus	GO:0001701 in utero embryonic development; GO:0001824 blastocyst development; GO:0006139 nucleobase-containing compound metabolic process; GO:0006351 transcription, DNA-templated; GO:0006355 regulation of transcription, DNA-templated; GO:0006357 regulation of transcription from RNA polymerase II promoter; GO:0006366 transcription from RNA polymerase II promoter; GO:0006464 cellular protein modifi…	GO:0000151 ubiquitin ligase complex; GO:0005622 intracellular; GO:0005623 cell; GO:0005634 nucleus; GO:0005654 nucleoplasm; GO:0016592 mediator complex; GO:0031974 membrane-enclosed lumen; GO:0031981 nuclear lumen; GO:0032991 macromolecular complex; GO:0043226 organelle; GO:0043227 membrane-bounded organelle; GO:0043229 intracellular organelle; GO:0043231 intracellular membrane-bounded organelle;…	GO:0003712 transcription cofactor activity; GO:0003713 transcription coactivator activity; GO:0003824 catalytic activity; GO:0003899 DNA-directed 5'-3' RNA polymerase activity; GO:0016740 transferase activity; GO:0016772 transferase activity, transferring phosphorus-containing groups; GO:0016779 nucleotidyltransferase activity; GO:0034062 5'-3' RNA polymerase activity; GO:0097747 RNA polymerase a…	K15152	MED21, SRB7; mediator of RNA polymerase II transcription subunit 21
A0A452G3C9	Calumenin(predicted) OS=Capra hircus OX=9925 GN=CALU PE=4 SV=1	1.973	Up	0.00188432	CALU	37.068	40	10	20	1	0.513	0.965	0.847	0.459	0.754	1.33	1.371	1.757	1.261	1.263	extracellular	GO:0006464 cellular protein modification process; GO:0006807 nitrogen compound metabolic process; GO:0008152 metabolic process; GO:0009987 cellular process; GO:0019538 protein metabolic process; GO:0036211 protein modification process; GO:0043170 macromolecule metabolic process; GO:0043412 macromolecule modification; GO:0043687 post-translational protein modification; GO:0044237 cellular metaboli…	GO:0005622 intracellular; GO:0005623 cell; GO:0005737 cytoplasm; GO:0005783 endoplasmic reticulum; GO:0005788 endoplasmic reticulum lumen; GO:0005794 Golgi apparatus; GO:0012505 endomembrane system; GO:0031974 membrane-enclosed lumen; GO:0043226 organelle; GO:0043227 membrane-bounded organelle; GO:0043229 intracellular organelle; GO:0043231 intracellular membrane-bounded organelle; GO:0043233 org…	GO:0005488 binding; GO:0005509 calcium ion binding; GO:0043167 ion binding; GO:0043169 cation binding; GO:0046872 metal ion binding;				PF13499; PF13202; PF13833	EF-hand domain pair; EF hand; EF-hand domain pair
A0A452GAV0	Fibronectin type III domain-containing protein 8(predicted) OS=Capra hircus OX=9925 GN=FNDC8 PE=4 SV=1	0.319	Down	0.000101037	FNDC8	35.265	9	2	3	2	1.625	1.292	2.044	1.76	1.231	0.32	0.478	0.645	0.439	0.653	cytoplasm							PF00041	Fibronectin type III domain
A0A452GAH2	Citrate synthase(predicted) OS=Capra hircus OX=9925 GN=CS PE=4 SV=1	0.567	Down	0.00177937	CS	50.582	35.2	20	45	20	1.764	1.131	1.205	1.498	1.003	0.812	0.726	0.604	0.709	0.892	mitochondria				K01647	CS, gltA; citrate synthase [EC:2.3.3.1]	chx00020 Citrate cycle (TCA cycle) - Capra hircus (goat); chx00630 Glyoxylate and dicarboxylate metabolism - Capra hircus (goat); chx01100 Metabolic pathways - Capra hircus (goat); chx01200 Carbon metabolism - Capra hircus (goat); chx01210 2-Oxocarboxylic acid metabolism - Capra hircus (goat); chx01230 Biosynthesis of amino acids - Capra hircus (goat);	PF00285	Citrate synthase
A0A452F2D6	Cylicin 2(predicted) OS=Capra hircus OX=9925 PE=4 SV=1	0.206	Down	1.8141e-06	---	46.143	30.2	11	20	11	2.287	1.395	1.217	2.057	1.37	0.268	0.345	0.379	0.342	0.377	nucleus	GO:0006996 organelle organization; GO:0007010 cytoskeleton organization; GO:0009987 cellular process; GO:0016043 cellular component organization; GO:0071840 cellular component organization or biogenesis;	GO:0005622 intracellular; GO:0005623 cell; GO:0005737 cytoplasm; GO:0005856 cytoskeleton; GO:0033011 perinuclear theca; GO:0033150 cytoskeletal calyx; GO:0043226 organelle; GO:0043228 non-membrane-bounded organelle; GO:0043229 intracellular organelle; GO:0043232 intracellular non-membrane-bounded organelle; GO:0044422 organelle part; GO:0044424 intracellular part; GO:0044430 cytoskeletal part; GO…	GO:0005198 structural molecule activity; GO:0005200 structural constituent of cytoskeleton;
[truncated: 93 more rows]
