# Supplementary material for: The characteristics of proteome and metabolome associated with contrasting sperm motility in goat seminal plasma
Source: Sci Rep. 2021 Jul 30;11:15562. doi: 10.1038/s41598-021-95138-9 (PMC8324791; doi:10.1038/s41598-021-95138-9)
Supplement: Supplementary file 6 — Supplementary Information 6. [file 41598_2021_95138_MOESM6_ESM.xlsx]

## Sheet: Sheet1
Index	Compounds	Formula	Precursor(g/mol)	Mass(g/mol)	score	RT(min)	MS_level	CAS_ID	HMDB_ID	cpd_ID	Metlin_ID	Pubchem.CID	Class.I	Class.II	G1	G2	G3	G4	G5	G6	G7	G8	G9	G10	B1	B2	B3	B4	B5	B6	B7	B8	B9	B10	mix01	mix02	mix03
MW3089	zinniol	C15H22O4	265.1475	266.1518	0.6947	13.2118	2-search-DB	--	--	C10840	--	1.0	-	-	924314.01	1514332.58	476626.53	633836.07	505019.44	496355.76	511420.94	566096.8	466109.26	582353.59	1965987.78	4093023.27	1705755.9	1065944.64	2664829.91	1369050.5	3231784.8	2898527.29	6968430.67	3694971.96	940871.41	1109807.93	1146850.83
MW9570	trans-Zeatin riboside diphosphate	C15H23N5O11P2	1045.1647	511.0869	0.6032	4.7601	1	--	--	C16429	--	1.0	-	-	30581.73	5300.73	62375.13	18885.75	14827.39	17825.68	11875.89	13266.1	52116.69	22464.39	1507.64	1136.15	489.23	2843.16	2690.21	397.39	4222.78	3273.23	506.98	1951.36	4669.08	5053.11	5142.82
MW2935	trans-Zeatin riboside monophosphate	C15H22N5O8P	452.0932	431.1206	0.9153	1.4655	1	--	--	C16430	--	1.0	-	-	71731.32	18906.88	33711.02	32457.89	31807.35	32765.78	14665.92	22858.29	49655.86	21168.5	30285.08	46865.22	3219.04	45817.71	30678.64	43165.45	53680.23	155613.09	85708.66	41715.31	52845.63	50936.71	52669.87
MW9568	trans-Tetradec-2-enoyl-CoA;(2E)-Tetradecenoyl-CoA	C35H60N7O17P3S	976.3018	975.2979	0.5473	4.6016	1	--	HMDB03946	C05273	--	1.0	-	-	38251.03	34167.77	7159.36	28880.29	42427.29	21431.86	40286.76	29360.26	33354.96	6686.57	10113.7	23396.1	20155.18	16937.53	9128.45	10261.87	11223.75	5419.39	3336.87	63942.83	23815.9	22717.4	19186.04
MW2933	trans-Hexadec-2-enoyl-CoA;trans-2-Hexadecenoyl-CoA;(2E)-Hexadecenoyl-CoA	C37H64N7O17P3S	984.3087	1003.3292	0.5691	1.1034	1	--	HMDB03945	C05272	--	1.0	-	-	41707.97	48413.6	27447.01	37261.76	70777.9	13702.55	63345.21	15014.61	40729.34	19914.14	5816.16	11894.73	2283.32	6816.52	5006.87	3813.56	4949.09	7493.97	5586.09	33069.15	30716.24	31519.65	31468.7
MW9566	trans-Hex-2-enoyl-CoA;(2E)-Hexenoyl-CoA	C27H44N7O17P3S	940.0878	863.1727	0.5247	1.1232	1	--	HMDB03944	C05271	--	1.0	-	-	17555.74	3927.92	13425.93	6451.95	4174.65	3370.12	4857.0	8234.83	14680.05	10993.53	12533.49	13960.65	1818.9	10826.68	14839.36	14655.21	13170.83	17231.64	14326.3	19977.55	15750.08	16007.26	16025.26
MW2932	trans-Glutaconic acid	C5H6O4	111.0084	130.0266	0.8859	2.7491	2-MetDNA	628488	HMDB0000620	C02214	--	1.0	-	-	14308333.26	11900396.89	11835123.28	10596873.26	7925170.38	10112844.29	5066028.79	9628258.81	11952530.46	11135557.28	13043997.29	13748513.57	5457178.95	13196904.78	12341108.48	12980229.48	13194178.05	15892129.7	14366869.13	12713011.12	12689309.99	12618146.87	12546726.76
MW2931	trans-Dec-2-enoyl-CoA;(2E)-Decenoyl-CoA	C31H52N7O17P3S	956.1874	919.2353	0.5404	2.342	1	--	HMDB03948	C05275	--	1.0	-	-	590.95	320.81	288.27	207.75	312.18	970.32	593.66	275.06	781.9	81.28	5001.93	459.98	59.01	2614.98	4408.59	4346.21	4298.57	9653.13	8641.25	154.33	2838.53	2649.09	2835.22
MW9560	trans-Cinnamic acid	C9H8O2	166.0868	148.0524	0.9997	2.1503	2-MetDNA	140-10-3	HMDB0000930	C00423	63104.0	1.0	-	-	44813667.84	26600431.64	23967661.69	31751111.89	27406246.95	24859405.77	26658818.69	22706502.22	29506831.63	20234104.45	27034865.55	64303581.57	40577096.86	23338334.56	26813988.41	29419682.81	31648327.33	39333019.62	31458737.7	50939701.33	34422265.64	34970617.66	35493056.14
MW9554	trans-Aconitic acid	C6H6O6	139.0027	174.0164	0.7135	2.1858	2-search-DB	--	HMDB0000958	C02341	--	1.0	-	-	2997362.97	3640479.68	2996649.56	3305984.3	2493323.9	3348597.69	2002169.55	2360958.35	4675222.26	2288453.88	2536280.35	2826245.99	989171.14	2559678.47	1374989.77	3053578.34	3129334.75	4603266.42	4781413.81	2325058.34	3237075.48	3237242.21	3249651.7
MW9553	trans-4-Hydroxytamoxifen	C26H29NO2	451.2361	387.2198	0.6146	6.612	1	68047-06-3	--	C05011	708.0	1.0	-	-	8475.29	570.16	3398.73	3636.79	895.25	15317.99	1052.6	15713.82	3752.32	4664.44	2945.12	4511.91	2616.05	3652.07	2288.77	2289.29	3263.6	3206.59	7803.73	152.72	7394.72	7267.3	7153.44
MW9552	trans-3-Chloroallyl aldehyde	C3H3ClO	128.9514	89.9872	0.7474	13.8405	1	--	HMDB0060516	C06613	--	1.0	-	-	3187360.89	3294239.21	3141477.34	3390032.8	2914023.79	3433203.32	3485215.97	3328848.32	3455679.36	3122746.71	3456321.43	3472146.91	3063192.46	3291296.04	3052175.58	3061784.42	3408745.87	3278486.35	3524293.3	3081755.44	3278608.82	3283192.14	3342651.84
MW9551	trans-2-[(Dimethylamino)methylimino]-5-[2-(5-nitro-2- furyl)-vinyl]-1,3,4-oxadiazole;N,N-dimethyl-N'-(5-(2-(5-nitro-2-furyl)vinyl)-1,3,4-oxadiazol-2-yl)-Formamidine	C11H11N5O4	555.1693	277.0811	0.6388	1.0605	1	25962-77-0	--	C19232	--	1.0	-	-	175267.27	305304.21	94763.39	226741.55	205232.18	93778.04	244615.57	89671.27	117123.62	77359.54	9158.57	27904.71	5279.53	4013.94	14253.04	13109.06	7723.74	5356.9	7255.43	74880.55	65465.68	61613.5	66215.0
MW2926	trans-2-Enoyl-OPC8-CoA	C39H62N7O18P3S	1060.3054	1041.3085	0.5916	1.5186	1	--	HMDB11122	C16328	--	1.0	-	-	131924.19	159400.38	56326.91	89975.05	135720.43	70004.46	138568.94	77862.13	79788.0	81840.5	735.76	16431.04	1704.46	3371.14	605.49	2254.09	5856.59	526.29	4028.72	31508.43	58087.48	57170.52	46086.16
MW2925	trans-2-Enoyl-OPC4-CoA	C35H54N7O18P3S	1001.2651	985.2459	0.6471	4.1201	1	--	HMDB11120	C16336	--	1.0	-	-	55239.46	10035.23	40940.96	61608.17	26724.85	31911.18	26020.56	31180.68	57222.26	33501.46	2213.61	2039.32	1676.2	3947.07	3316.29	3832.54	2263.74	8840.11	14484.74	641.25	20003.82	18998.54	20173.02
MW9549	trans-1,2-Dichloroethene;trans-Acetylene dichloride	C2H2Cl2	96.9612	95.9534	0.6096	13.8496	1	540-59-0	--	C06791	--	1.0	-	-	1498571.17	1646167.56	1829975.71	1485546.9	1795688.75	1660382.34	1714336.41	1906849.47	1659934.58	1249909.07	1767190.93	1600341.88	1822248.7	1502165.2	1712348.27	1624632.14	1617792.19	1818392.61	1607476.98	1906804.65	1538273.61	1581360.96	1507544.66
MW9264	tetranor-PGDM-d6	C16H18D6O7	381.2027	334.1899	0.6441	4.5348	1	--	--	--	96413.0	1.0	-	-	11437.46	5653.15	5997.58	501.65	8190.21	7488.3	7762.7	7391.99	8619.98	8178.24	34981.16	6765.17	10085.96	34129.51	38881.59	49134.53	42283.09	1827.27	1669.36	694.96	10362.69	10808.6	10842.38
MW9231	tert-Butylbicyclophosphorothionate;tert-Butylbicyclophosphorothioic acid;TBPS	C8H15O3PS	187.0333	222.048	0.5868	1.6026	1	70636-86-1	--	C19930	--	1.0	-	-	1265.64	22288.49	15203.38	5579.54	18585.84	20223.62	20866.9	21323.92	21841.78	22976.05	44237.92	34393.12	52976.28	45612.12	48554.03	24240.92	38425.31	42797.45	13112.21	33122.15	38328.53	38385.35	35838.41
MW2595	strychnine N-oxide	C21H22N2O3	699.3205	350.163	0.8256	4.7349	1	23257-79-6	--	--	34472.0	1.0	-	-	18274.47	1252.11	11446.42	13301.78	2706.46	1609.85	1111.09	10166.53	2173.24	324.23	189982.48	146479.67	249530.15	220068.04	202892.26	255530.24	270859.63	100951.9	107429.63	265151.28	120234.95	120236.32	120455.63
MW9185	stigmast-5-en-3beta-ol 3-0-beta-D-glucopyranoside	C35H60O6	594.4721	576.439	0.6062	4.6014	1	--	--	--	84133.0	1.0	-	-	533940.35	57525.45	74684.3	2748.82	146493.85	2692.56	220975.63	6656.2	527801.17	8552.57	32529.41	49813.61	77836.59	4555.09	31000.81	2698.82	2932.14	5708.09	42447.95	90590.84	6433.91	5200.83	5945.5
MW2587	stevioside; LC-ESI-QQ; MS2; CE	C38H60O18	841.3266	804.378	0.6483	0.9311	1	57817-89-7	--	C09189	--	1.0	-	-	16537.2	24063.58	15537.89	19936.04	21283.95	3719.18	23241.59	3793.09	7481.62	5931.18	3305.25	16485.14	1472.64	5269.1	3484.41	2775.07	1657.33	1870.21	888.28	9195.25	4970.84	5174.97	5544.08
MW2575	sophoramine	C15H20N2O	281.1062	244.1576	0.6498	6.9781	1	6882-66-2	--	C10782	--	1.0	-	-	1968587.95	789954.14	260926.98	670017.58	603803.23	436052.75	632423.31	447822.29	1573956.16	477971.74	345530.05	27309.46	212112.17	382256.28	315419.24	204994.54	449525.07	551873.79	440450.12	5177.39	811974.25	768517.38	746171.4
MW2411	psi-Pelletierine	C9H15NO	174.0893	153.1154	0.5888	0.9047	1	--	HMDB0034580	C10865	--	1.0	-	-	32980.25	52726.53	52900.8	32134.23	19176.35	44107.83	37811.77	45242.8	1672.45	29902.7	173019.41	66805.36	155155.53	146309.42	219607.05	167880.31	152254.98	66520.19	65607.59	131432.63	69931.97	67673.92	70205.88
MW2363	progesterone	C21H30O2	350.205	314.2246	0.633	5.383	2-MetDNA	57-83-0	HMDB0001830	C00410	402.0	1.0	-	-	212021.12	28028.31	43874.36	53223.89	85095.52	160767.53	81739.63	151034.35	112182.48	74181.17	51876.76	11655.08	25896.54	58940.66	68170.61	52336.74	49947.93	102184.75	126605.38	389.73	94098.67	97658.34	95038.94
MW2310	ponasterone A	C27H44O6	445.2957	464.3138	0.6361	8.05	1	13408-56-5	--	C08835	57640.0	1.0	-	-	4058.33	1120.01	4311.72	3804.81	2405.21	7219.93	2316.78	5813.48	1054.43	4838.11	12655.14	1396.32	4888.88	11082.96	11698.31	13018.06	10300.35	6671.97	8394.08	2531.91	5396.58	5167.2	5428.08
MW2145	p-Tolyl Sulfate	C7H8O4S	187.0066	188.0143	0.7699	5.3797	2-search-DB	91978-69-7	--	--	263577.0	1.0	-	-	122862.48	256413.04	132588.71	142204.6	1038917.53	132067.14	1095130.27	97384.96	461245.18	173765.0	512802.73	1062044.11	283924.06	511939.48	495281.22	491418.87	503763.97	62395.8	76104.01	303618.97	439959.14	478736.64	474295.02
MW8564	p-Toluenesulfonic acid	C7H8O3S	172.0179	172.0194	0.573	13.8571	1	104-15-4	HMDB59933	C06677	--	1.0	-	-	356650.64	205351.09	228722.91	321871.65	416754.45	409875.14	406630.73	412642.56	231913.78	152188.55	362048.64	388370.79	417030.54	431154.58	155464.13	372835.09	350767.04	337988.14	338884.67	124690.44	310532.32	323186.18	315300.8
MW2143	p-Hydroxybenzoic acid-O-glucoside	C13H16O8	299.0769	300.0845	0.6269	4.9236	1	--	--	C03993	--	1.0	-	-	6765.38	7273.67	6355.4	44668.69	83435.26	106718.75	80661.8	102786.62	61938.44	46583.22	50376.15	46866.1	27117.37	54680.9	53856.14	48534.04	54096.27	22655.49	33136.91	33374.43	48541.51	48063.33	48077.5
MW8563	p-FLUOROPHENYLALANINE	C9H10FNO2	230.0821	183.0696	0.6286	1.9872	1	51-65-0	--	C11217	44126.0	1.0	-	-	6333.2	5385.29	10534.47	7204.44	4211.75	4268.27	2984.43	2351.54	4411.16	4899.79	34468.85	32741.66	20239.01	41267.89	40805.19	37194.1	37336.19	33426.72	31800.95	33285.28	24608.23	23753.71	24469.96
MW8562	p-Cymene	C10H14	134.1073	134.1096	0.5197	1.4026	1	--	HMDB0005805	C06575	41091.0	1.0	-	-	30266.3	76540.26	61595.7	41167.51	86639.02	35232.71	88728.94	47478.2	23556.99	32244.37	423480.97	302972.36	97839.69	393457.22	494000.26	434903.4	616910.42	249106.72	173117.72	328191.75	172062.49	172402.22	174660.56
MW8561	p-Chloroaniline	C6H6ClN	128.0253	127.0189	0.5776	13.8753	1	106-47-8	--	C14450	--	1.0	-	-	150512.11	72271.16	105055.18	80149.39	70334.53	47551.53	75439.21	30453.05	65077.19	71746.77	83183.97	108534.19	50691.68	73115.64	50811.81	65970.93	54099.1	68799.72	59450.93	77048.16	63701.92	61854.66	58418.31
MW2141	p-Bromophenylacetic acid	C8H7BrO2	234.9365	213.9629	0.5682	5.4831	1	1878-68-8	--	C03076	--	1.0	-	-	36894.01	1285.29	5497.89	14013.72	1461.77	36357.81	204.02	47478.36	22870.81	6682.65	466.55	230.7	2178.36	644.07	213.3	228.34	4749.0	6705.48	2933.81	2903.46	5060.85	4371.09	4717.94
MW8559	p-Aminobenzamidine dihydrochloride	C7H9N3.2HCl	207.0326	207.033	0.6399	12.6025	1	2498-50-2	--	C11628	--	1.0	-	-	7646.02	6821.95	7070.32	6180.43	8237.88	12274.65	10504.32	9355.43	4472.37	2958.0	4711.27	1843.87	2867.82	4265.12	5595.55	4158.76	3088.54	2487.73	1835.21	1028.12	62766.09	63573.52	54661.76
MW8558	p-Aminoazobenzene	C12H11N3	239.1296	197.0953	0.6115	10.0033	1	22162	--	C19187	--	1.0	-	-	67864.21	697.66	1361.19	1739.51	1590.79	1168.07	927.4	756.54	17633.11	1036.82	25686.52	21846.29	2951.04	19001.85	21413.37	27601.36	35471.43	4117.6	1410.45	19821.89	6424.03	5777.97	7012.09
MW2140	p-Acetaminobenzaldehyde	C9H9NO2	162.0555	163.0633	0.6816	4.9749	2-search-DB	122-85-0	--	--	2829.0	1.0	-	-	306895.18	266366.61	442206.11	289487.51	259102.15	356562.81	428997.7	449927.77	811192.13	725045.13	246233.66	214650.93	115937.41	254337.61	235056.34	233265.67	254438.48	518203.54	272483.46	144760.79	329287.55	339108.98	349474.89
MW2125	ostruthin	C19H22O3	297.1526	298.1569	0.6846	13.233	2-search-DB	--	--	C09281	--	1.0	-	-	348570.44	330802.09	230043.55	266365.3	276126.53	374087.97	301851.17	347976.5	366879.35	414180.61	708567.01	657281.85	793282.35	699914.11	661364.68	703052.23	723940.31	658376.08	675607.54	1019706.51	665634.94	646953.76	677627.94
MW2122	ortho-Vanadate;Vanadate	VO4	133.9236	114.9236	0.5678	13.2762	1	14333-18-7	--	C11627	--	1.0	-	-	733956.31	660822.77	665396.07	747674.19	545612.0	742283.48	591231.02	675279.11	767340.43	579769.74	836907.28	680302.22	693180.09	776953.13	562866.77	760313.0	644950.04	663256.72	756980.13	564173.86	523846.41	525676.89	537220.24
MW8439	neriifolin	C30H46O8	581.3309	534.3193	0.5855	4.8238	1	466-07-9	--	C08876	43898.0	1.0	-	-	4247.33	7049.03	1635.23	17941.96	7010.36	8307.31	6287.27	4006.06	13040.91	1691.26	311.21	1870.61	3101.57	318.45	635.37	268.6	520.07	11903.58	10969.26	910.52	15595.28	15292.59	15579.51
MW1995	myo-Inositol	C6H12O6	161.0454	180.0634	0.5942	0.8444	2-search-DB	87-09-8	HMDB0000211	C00137	144.0	1.0	-	-	1132337.9	747618.95	1668894.05	1432431.97	735390.18	1542006.61	768394.79	1610425.01	1081827.62	1721937.41	1199346.54	708081.98	1577443.65	1091610.25	1217140.02	1088925.91	1074962.99	1641874.24	1527693.16	723311.78	1195308.51	1195666.29	1198515.11
MW8279	mono-isopropyl-disopyramide	C18H23N3O	297.1834	297.1841	0.8854	5.7812	1	--	HMDB0061024	--	--	1.0	-	-	73502.82	22240.89	84243.72	98165.14	91820.24	162291.94	97607.17	163624.17	136957.55	119677.8	74322.12	19493.1	28967.07	62579.07	70574.41	81826.06	90881.02	99528.22	89699.24	973.82	100000.87	105028.29	103359.65
MW8221	methyl 2-benzamidoacetate	C10H11NO3	235.1076	193.0739	0.6388	2.441	1	--	--	--	24095.0	1.0	-	-	113.01	8057.89	69.62	72.43	5814.72	19.69	133.32	129.82	40.73	21.46	1259.01	319.13	177077.85	749.32	623.87	891.29	282.44	2910.6	1040.58	167.47	6402.05	6417.36	6544.74
MW1909	meso-2,6-Diaminoheptanedioate	C7H14N2O4	189.0877	190.0954	0.6204	0.8324	1	922-54-3	--	C00680	63450.0	1.0	-	-	20741.75	18248.36	7311.11	10103.82	15668.63	10712.11	16340.58	12315.67	4195.0	9249.17	8236.88	5249.84	4255.68	5174.23	6081.68	5387.52	5869.13	4791.86	4826.51	6313.85	10070.38	10105.43	9713.38
MW8154	malvidin-3-O-xyloside	C22H23O11	486.1137	463.124	0.6233	11.727	1	--	--	--	263561.0	1.0	-	-	462.82	592.29	318.87	432.9	739.52	278.33	313.9	671.1	1681.49	199.6	243.84	357.88	317.99	429.08	169.57	387.88	202.22	312.74	375.12	297.4	2778.62	2916.73	2169.21
MW8140	m-Chlorobenzamide;3-Chlorobenzamide	C7H6ClNO	173.0488	155.0138	0.5659	13.8618	1	618-48-4	--	C11731	--	1.0	-	-	276960.89	278491.04	261120.1	213561.8	595709.09	252117.78	306075.3	291636.43	243390.0	326577.77	284598.75	186015.33	303560.79	288403.38	31770.81	332350.98	162971.27	228944.81	332441.97	193318.56	302153.71	282900.94	312569.65
MW8139	m-Carboxyphenyl phenylacetamidomethylphosphonate	C16H16NO6P	416.0251	349.0715	0.6305	0.8338	1	--	--	C04684	--	1.0	-	-	163301.12	95518.48	124224.23	117449.84	117289.95	130621.41	117064.8	132273.24	150132.72	101475.12	50068.53	91410.11	94599.54	64353.7	32702.83	46557.16	42710.48	41573.53	35353.39	124192.58	117237.1	120971.51	118722.97
MW7878	k-Strophanthin-beta	C36H54O14	710.3522	710.3514	0.595	10.6252	1	560-53-2	--	C16820	--	1.0	-	-	47877.37	71617.98	28706.51	48703.77	50481.28	73095.8	55589.29	62682.67	3144.9	44936.33	13617.29	22033.65	5957.18	10315.26	8727.22	10749.41	5977.03	9158.12	9985.94	14029.81	38904.72	37038.92	32819.5
MW7720	homo-Tienilic Alcohol	C14H12Cl2O3S	660.9833	329.9884	0.6107	4.7758	1	236735-89-0	--	--	64663.0	1.0	-	-	189176.38	30755.38	185405.57	73897.96	32792.44	76623.96	42453.05	81112.9	138479.34	77297.87	1390.79	4531.11	6009.48	1215.54	654.1	1981.18	1530.84	4282.55	4403.28	2231.35	15956.39	15924.42	15742.9
MW7501	gamma-L-Glutamyl-S-(hercyn-2-yl)-L-cysteine S-oxide	C17H28N5O8S	428.1612	462.1659	0.7507	4.4851	2-MetDNA	--	--	C20995	--	1.0	-	-	28750.68	19495.51	26565.47	19069.86	18238.5	27218.45	18475.7	19276.01	19010.14	20186.44	29403.05	32576.92	4707.93	27012.9	23314.76	25112.28	28206.58	28006.28	28181.75	31190.16	26631.59	26497.31	26490.36
MW7500	gamma-Glutamylglutamic acid	C10H16N2O7	322.0692	276.0958	0.8489	4.3755	2-MetDNA	--	HMDB0011737	C05282	--	1.0	-	-	21451.47	18330.86	11261.56	11892.62	15785.81	12013.47	16401.27	10872.08	14749.98	681.55	92280.38	47170.68	53041.71	98935.59	88522.25	103253.48	101230.44	4577.57	1163.28	55393.41	7841.63	7577.52	7536.46
MW7497	gamma-Amino-gamma-cyanobutanoate;4-Amino-4-cyanobutanoic acid	C5H8N2O2	146.092	128.0586	0.79	0.8702	2-MetDNA	--	--	C05715	--	1.0	-	-	4191.43	554686.23	21113.35	398883.65	520604.95	506399.08	639208.81	629072.72	537732.58	640796.2	303389.2	119029.41	3942267.87	431038.3	404763.83	337605.36	426553.03	13456.16	18524.82	275193.23	179445.0	184673.08	183487.78
MW7436	fenoldopam	C16H16ClNO3	323.1163	305.0819	0.6122	1.1533	1	157716-52-4	HMDB0014938	C07693	4024.0	1.0	-	-	4636.1	67332.26	37336.15	17446.85	25425.35	56943.26	28776.92	59052.74	1458.06	22447.79	4412.1	16237.31	3226.96	945.71	2335.44	3122.19	3870.54	11077.75	20640.77	6457.44	11232.54	11090.78	11750.87
MW1292	epsilon-Rhodomycinone;Rhodomycinone	C22H20O9	409.0922	428.1107	0.8573	6.5047	1	21288-60-8	--	C12425	--	1.0	-	-	46889.09	111698.57	17195.25	28912.51	119118.51	86641.73	124606.44	79933.94	50133.28	25750.49	3546.81	31083.47	48094.33	5778.77	5291.38	3912.22	4451.29	16612.16	1990.25	1574.03	18623.12	16702.38	16893.66
MW1282	ent-Fisetinidol-(4beta->8)-catechin-(6->4beta)-ent-fisetinidol	C45H38O16	855.1907	834.216	0.649	1.1124	1	88269-47-0	--	C10225	--	1.0	-	-	26049.09	43447.63	38710.88	42984.95	63802.58	34385.53	42699.55	33011.52	42411.05	30657.88	7840.15	15456.42	18958.72	3516.02	867.21	4274.94	4959.62	10888.41	9705.33	18878.18	29655.59	29491.05	28016.57
MW7303	dl-alpha-Tocopherol nicotinate;Tocopheryl nicotinate	C35H53NO3	577.4367	535.4025	0.6293	4.788	1	51898-34-1	--	C12981	--	1.0	-	-	97899.85	16332.54	147658.92	61538.5	31245.36	49243.98	46775.62	35613.57	79003.49	78587.3	2224.5	2532.74	2528.84	1311.51	1093.39	1796.12	2322.08	10457.95	3465.08	935.54	11963.85	12383.94	12345.13
MW7279	dinor-12-oxo Phytodienoic Acid-d5	C16H19D5O3	252.1997	269.2039	0.5786	0.8111	1	--	--	--	96439.0	1.0	-	-	62934.38	59616.81	46481.38	54284.84	65470.67	47010.28	64946.29	42219.39	58083.86	48381.25	32533.73	90975.34	2899.18	28553.07	27229.36	30702.61	27053.09	2999.34	3753.24	190221.67	37205.71	36999.42	37205.97
MW1163	dexamethasone phosphate	C22H30FO8P	471.1512	472.1662	0.5693	0.7967	1	--	--	D07802	3977.0	1.0	-	-	143611.71	216494.1	71298.19	150563.54	118270.71	65307.08	116506.17	64791.44	58690.67	71253.09	40111.01	56685.79	36199.65	30102.01	20101.69	36991.95	24481.01	25447.64	30263.68	43847.07	71373.34	72159.74	71407.61
MW7143	dehydrofelodipine	C18H17Cl2NO4	426.0242	381.0535	0.6075	5.055	1	--	HMDB0061029	--	--	1.0	-	-	1768.55	1565.07	1067.95	335.5	85.35	1545.07	128.12	1396.29	1514.17	1402.35	190.23	437.12	426.09	412.92	478.24	644.78	302.14	600.28	1177.08	899.72	5500.89	5483.18	5439.35
MW7339	dTDP-beta-L-rhodinose	C16H26N2O13P2	481.0771	516.091	0.6484	0.8267	1	--	--	C12447	--	1.0	-	-	11091.9	3347.59	56652.0	77973.96	57336.0	66356.98	49629.08	76462.83	33950.29	36902.0	14975.15	31011.26	34378.55	11111.84	7049.75	10571.73	10621.22	10583.29	8904.38	13424.51	37875.21	37986.76	37201.94
MW7338	dTDP-acarviose-7-phosphate	C23H38N3O21P3	862.0389	785.1211	0.6016	4.0735	1	--	--	C21208	--	1.0	-	-	13710.23	2017.76	4160.93	2302.93	772.6	860.3	639.71	539.14	722.05	1807.7	12011.11	25545.03	283.28	15554.98	16214.4	17458.05	23277.17	17033.46	18839.44	32536.76	12325.41	11946.46	12009.99
MW7340	dTDP-D-galacturonate	C16H24N2O17P2	543.0411	578.055	0.6493	4.1558	1	--	--	C03034	--	1.0	-	-	4810.79	63275.78	13732.63	17646.14	29007.64	15527.0	41345.9	14903.51	28338.6	3963.24	644.38	995.18	17613.95	271.78	4210.53	490.19	2648.31	3800.71	5110.34	7691.62	25778.74	25385.59	25360.88
MW1261	dTDP-6-deoxy-beta-L-talose;dTDP-beta-L-pneumose	C16H26N2O15P2	547.074	548.0808	0.6209	2.7612	1	--	--	C03187	--	1.0	-	-	36625.49	26841.51	18006.72	18376.04	30009.76	17742.88	28239.21	14309.78	24050.12	14689.54	4147.03	55628.61	6348.37	4310.33	5360.7	7096.75	7801.03	2776.2	5107.81	45449.04	20235.03	20444.71	20157.44
MW7336	dTDP-5-dimethyl-L-lyxose;dTDP-4-O-demethyl-beta-L-noviose	C17H28N2O15P2	676.9737	562.0965	0.5543	1.1089	1	--	--	C12481	--	1.0	-	-	476.85	5443.83	13091.33	8337.27	5395.54	14374.91	4597.93	15001.61	6916.77	19063.62	13697.37	9232.45	8448.11	13614.39	12662.05	26026.55	13712.17	15298.92	36607.62	4636.33	9924.75	10057.12	9891.8
MW1259	dTDP-4-oxo-5-C-methyl-L-rhamnose;dTDP-4-oxo-6-deoxy-5-C-methyl-L-mannose	C17H26N2O15P2	576.1	560.0808	0.6461	1.8083	1	--	--	C11460	--	1.0	-	-	154738.45	282961.84	158434.47	165681.93	226338.91	189712.52	262051.23	121875.05	155071.4	162032.83	24156.62	88257.24	9588.04	34264.3	30753.96	22550.94	24778.91	51465.54	39601.64	85166.98	118298.48	117889.51	114308.01
MW7335	dTDP-4-oxo-2,6-dideoxy-L-allose	C16H24N2O14P2	597.0249	530.0703	0.5845	1.7686	1	--	--	C06622	--	1.0	-	-	171641.02	204381.81	147035.28	200951.09	116710.43	120145.65	83319.11	74505.07	143856.03	67614.42	99840.46	195210.89	19883.21	50071.39	71553.75	214630.26	156209.42	249656.51	226103.74	70507.13	135677.86	141600.25	151696.85
MW7333	dTDP-4-hydroxyamino-4,6-dideoxy-alpha-D-glucose	C16H27N3O15P2	581.1261	563.0917	0.6247	4.0037	1	--	--	C21348	--	1.0	-	-	3019.71	639.75	2046.15	5179.96	320.02	909.31	278.97	380.43	189.66	352.58	43794.04	16787.12	30408.33	55917.67	46473.73	54231.31	64208.87	35422.73	44599.07	24535.04	18360.38	18116.59	17944.64
MW7332	dTDP-4-dehydro-beta-L-rhamnose;dTDP-4-dehydro-6-deoxy-beta-L-mannose;dTDP-4-oxo-6-deoxy-L-mannose;dTDP-4-oxo-L-rhamnose	C16H24N2O15P2	591.0365	546.0652	0.6492	1.9584	1	--	--	C00688	--	1.0	-	-	73377.19	51230.68	33241.03	44465.95	98765.1	30260.17	37638.44	23541.53	97948.87	33559.45	34604.23	72760.91	71642.77	33417.42	76788.03	89943.58	37896.07	75450.34	52588.79	58941.71	57421.1	56059.63	55514.99
MW7331	dTDP-4-amino-2,4-dideoxy-beta-L-xylose	C15H25N3O13P2	1057.1645	517.0863	0.5754	4.9429	1	--	--	C21354	--	1.0	-	-	34898.62	24027.69	76581.37	71128.78	50413.68	61657.85	31955.55	75686.42	52122.13	46743.48	15760.11	11873.44	49001.68	18421.52	19622.43	11350.22	16579.91	30406.71	19596.22	4186.24	26152.52	25760.27	26207.41
MW7330	dTDP-4-amino-2,3,4,6-tetradeoxy-D-glucose;dTDP-[(2R,5S,6R)-5-aminotetrahydro-6-methyl-2H-pyran-2-yl] ester;dTDP-4-amino-2,3,4,6-tetradeoxy-alpha-D-erythro-hexopyranose	C16H27N3O12P2	592.0271	515.107	0.5959	4.073	1	--	--	C18033	--	1.0	-	-	3249.64	2093.77	712.02	4339.87	2206.49	2199.81	1063.91	2058.0	896.24	1046.4	25312.17	20502.57	894.68	17094.46	17196.08	15031.5	21743.41	80556.98	58479.22	23290.42	16349.56	15752.73	15976.57
MW7328	dTDP-3-amino-2,3,6-trideoxy-C-methyl-D-erythro-hexopyranos-4-ulose	C17H27N3O13P2	1087.2122	543.1019	0.6165	5.1934	1	--	--	C12319	--	1.0	-	-	624828.57	697319.58	232206.61	332318.33	348388.5	176235.99	275917.61	202854.87	1375118.58	681306.42	125700.9	136990.74	81784.22	119538.28	123161.55	107280.17	109783.42	105081.48	117993.19	109314.42	233572.33	233368.81	232368.09
MW1258	dTDP-3,4-dioxo-2,6-dideoxy-D-glucose;dTDP-3,4-didehydro-2,6-dideoxy-alpha-D-glucose	C16H22N2O14P2	565.0015	528.0546	0.5613	1.6474	1	--	--	C06620	--	1.0	-	-	2950.15	28978.7	174876.69	68084.99	6859.82	60371.14	17736.57	76597.51	28167.13	19270.38	28198.45	39807.68	72289.52	21042.3	20351.98	19410.11	20810.45	22048.84	35070.74	22974.41	43453.74	43491.49	44109.01
MW7327	dTDP	C10H16N2O11P2	446.9942	402.0229	0.6494	1.1118	1	--	HMDB0001274	C00363	--	1.0	-	-	13361.18	16600.56	28861.89	31153.05	5787.17	37739.98	16701.44	28280.73	23000.23	67096.0	34354.83	32844.04	22382.81	70900.81	33842.89	37011.58	32917.6	96089.88	85326.53	16403.35	36058.97	34875.59	37533.92
MW7236	dIDP	C10H14N4O10P2	847.0269	412.0185	0.6286	4.0678	1	--	HMDB0003536	C01344	--	1.0	-	-	3998.61	1308.07	802.22	3188.41	581.19	1103.42	1579.06	230.64	599.24	850.23	16733.6	30196.31	11287.47	15216.32	20949.95	18265.56	22437.02	18260.84	14738.19	30409.7	12744.14	12682.86	12555.35
MW7062	cyclohexylammonium	C6H13N	100.112	99.1048	0.6412	13.2336	1	108-91-8	HMDB0062716	--	4139.0	1.0	-	-	25287.35	27197.76	26873.49	24018.1	23195.44	23580.93	25544.42	22072.74	24573.56	19877.99	17476.75	19537.67	16717.7	21778.56	18654.14	18386.77	16979.63	15302.41	18654.99	21887.6	23904.91	23722.12	24756.58
MW7055	cycloguanil	C11H14ClN5	541.1507	251.0938	0.6498	4.0584	1	--	HMDB0060974	--	--	1.0	-	-	63043.45	18921.1	35460.24	20983.39	5425.61	4151.54	3323.33	9192.11	4991.33	18104.94	63054.83	65036.82	1405.17	66478.79	48450.18	61963.33	65504.0	84723.21	55434.19	105987.85	53459.6	53966.52	53958.59
MW7054	cyclobenzaprine	C20H21N	240.1524	275.1674	0.5676	4.0696	1	--	HMDB0015060	C06931	3971.0	1.0	-	-	21717.17	8160.67	5274.91	9714.5	6512.37	10395.92	16580.86	26933.02	8061.37	10649.27	1869.46	3851.59	918.28	6568.11	4402.63	5215.76	4297.76	5837.74	5010.72	2326.93	7505.17	7921.93	8031.32
MW6913	cis-beta-D-Glucosyl-2-hydroxycinnamate	C15H18O8	442.9772	326.1002	0.8448	2.1917	2-MetDNA	--	HMDB0060077	C05839	--	1.0	-	-	81844.04	147442.85	126342.74	132268.87	86750.76	100475.82	72361.36	112547.64	111103.8	140700.66	129016.52	104807.01	40987.38	146085.16	119879.64	115029.69	126774.38	132246.66	157727.83	70874.83	107893.94	104123.58	103339.34
MW6908	cis-[8]-Shogaol	C19H28O3	351.217	304.2038	0.8737	4.8257	1	--	HMDB0031464	--	87699.0	1.0	-	-	266583.36	19730.24	10245.25	53184.77	36804.93	157485.3	49861.22	154514.22	44955.17	56796.26	270343.36	7868.49	56017.48	267299.13	240440.56	261018.65	293857.04	178411.12	229836.85	2633.44	154187.35	155710.61	154753.57
MW6916	cis-Zeatin;(Z)-2-Methyl-4-(1H-purin-6-ylamino)but-2-en-1-ol	C10H13N5O	237.1456	219.112	0.6265	1.8713	1	--	--	C15545	--	1.0	-	-	2537.47	16294.09	847.63	3736.85	6405.97	785.3	6386.62	1881.62	2473.41	448.49	470.08	2954.98	3853.46	1034.96	149.83	354.43	1127.57	86.48	3022.05	3179.24	8649.22	8525.33	8610.75
MW954	cis-N-Methyl-(S)-7,8,13,14-tetrahydroprotoberberine	C18H20N	271.1342	250.1596	0.6392	6.3237	1	--	--	C05318	--	1.0	-	-	12406.51	125.54	10425.66	6363.71	250.15	2433.93	453.03	3260.73	14720.82	18858.84	1927.03	6390.07	946.05	1170.67	2659.0	1072.2	3122.01	5342.4	3741.07	7588.83	8469.63	8677.82	8735.86
MW952	cis-Aconitic acid	C6H6O6	174.0125	174.0164	0.9272	1.5162	2-MetDNA	--	HMDB0000072	C00417	--	1.0	-	-	3263383.68	1703566.72	1018288.18	1538618.79	1190356.58	1528547.56	1198172.98	1163803.72	777321.22	1024930.15	1176543.51	1806779.15	1315624.56	1424188.47	1061821.8	1619854.22	1717690.21	1997338.21	2014135.62	2110769.95	1944163.6	1914473.67	1945892.99
MW6910	cis-5-dodecenoic acid	C12H22O2	216.1954	198.162	0.6157	6.1218	1	2430-94-6	--	--	34891.0	1.0	-	-	22098.81	58602.45	35262.24	59107.26	56961.65	57402.26	50831.25	47757.44	47089.2	48501.35	20112.01	42164.48	49083.01	39356.51	43719.25	31903.93	36399.3	27602.93	39635.23	29652.01	44812.3	44248.63	43385.85
MW6909	cis-11-Hexadecenal	C16H30O	261.2175	238.2297	0.794	0.8962	1	53939-28-9	--	--	34527.0	1.0	-	-	423189.52	126968.8	2322728.12	2732860.28	946902.13	805070.05	916626.81	768005.0	2749651.76	1886258.06	117033.13	157419.45	702092.61	108866.48	112524.83	111275.65	116955.32	106581.9	100878.54	65198.63	914453.47	913170.75	909686.89
MW6907	cis-(Homo)2-aconitate	C8H10O6	203.0528	202.0477	0.9043	0.8239	1	--	--	C20581	--	1.0	-	-	3169254.89	1725252.71	4224538.41	1790866.26	1001293.45	3390007.63	911217.75	2861678.58	2811984.54	3133183.79	2424919.81	1178964.92	4567378.55	2292053.85	2284874.09	2336540.29	2556315.1	5184214.89	5067095.9	441801.13	3247784.29	3262340.06	3060802.66
MW6888	cholesteryl hemisuccinate	C31H50O4	533.3862	486.3709	0.5154	10.361	1	1510-21-0	--	--	263481.0	1.0	-	-	7.97	13.76	4.76	4.58	6.35	2.61	8.6	13.6	7.17	5.25	8.04	11.46	6.49	17.41	10.29	4.11	7.33	19.18	54.19	3.57	535.46	536.3	532.02
MW6661	bk-DMBDB	C13H17NO3	253.1549	235.1208	0.6359	4.1112	1	17763-12-1	--	--	96733.0	1.0	-	-	69300.47	48403.85	27243.82	52848.99	7682.95	28225.0	6118.24	32096.2	20201.86	39443.19	28471.82	1744.69	27872.75	23867.6	31061.17	41597.96	39098.54	34327.06	28832.63	717.74	25870.33	28101.72	26532.74
MW6654	bis(7)-Tacrine	C33H40N4	559.279	492.3253	0.6279	0.7877	1	224445-12-9	--	--	64641.0	1.0	-	-	26722.89	18730.21	24339.56	15218.01	34565.68	8311.83	33145.58	6847.18	38152.35	20241.17	16038.9	21648.83	5234.84	16295.2	12709.84	14506.13	13904.17	6371.35	6271.86	28369.65	21787.53	22230.04	21748.24
MW6641	bicyclo-PGE2	C20H30O4	293.2103	334.2144	0.7145	5.4655	1	74158-09-1	HMDB0060054	--	3824.0	1.0	-	-	87728.56	33127.42	50704.3	52989.36	41672.71	132127.62	60452.16	89002.08	53184.62	73809.54	93115.96	21375.53	22329.76	79978.95	48080.79	70071.54	97824.1	50922.15	46516.69	2903.73	53081.59	53953.74	56761.7
MW768	beta-Zearalenol;beta-trans-Zearalenol	C18H24O5	639.3188	320.1624	0.588	10.0651	1	71030-11-0	HMDB41838	C14751	--	1.0	-	-	32217.54	7775.5	4994.59	4419.93	5101.65	6527.59	6079.26	6692.04	5721.25	5525.61	17863.07	17387.09	19411.15	16981.27	19085.39	19900.03	18000.19	6601.83	7401.98	21200.83	24716.26	24649.46	24291.35
MW6625	beta-Zeacarotene	C40H58	1094.9438	538.4539	0.5895	5.1913	1	--	HMDB35623	C05434	--	1.0	-	-	215044.45	947.54	168.84	547.31	424807.84	1116395.49	695430.21	352892.71	1135.54	369791.86	108530.26	151881.54	26587.03	103863.88	106074.85	94181.49	105612.91	139544.41	167828.79	130538.31	153649.36	152232.54	156021.6
MW6623	beta-Peltatin A methyl ether	C23H24O8	543.0221	428.1471	0.6479	4.8824	1	23978-65-6	--	C10730	--	1.0	-	-	161433.68	52553.86	11806.69	11266.86	11661.91	20914.43	21967.63	27340.73	49514.59	15358.24	1937.37	23229.68	14291.3	769.05	455.12	365.47	888.54	23918.25	37643.54	9465.22	29065.17	29298.15	28960.92
MW6622	beta-Funaltrexamine;beta-FNA	C25H30N2O6	499.1818	454.2104	0.8938	0.8962	1	72782-05-9	--	C18127	--	1.0	-	-	1295234.48	1490816.75	813785.15	921266.69	847219.67	645537.03	831307.19	600011.62	403613.84	433063.57	130247.43	323346.54	79029.68	127927.28	118462.65	130470.59	131238.09	161339.7	147578.84	201921.57	396570.2	395821.25	392125.63
MW6620	beta-D-Glucosamine	C6H13NO5	144.0654	179.0794	0.6432	1.5953	1	14257-69-3	HMDB0030091	C08349	266.0	1.0	-	-	62412.09	61015.72	49835.17	91439.04	97907.75	92351.96	69515.57	109132.46	62577.56	93651.61	78625.63	89362.34	51717.1	73699.68	72401.56	79609.68	89678.07	63318.56	81773.04	127275.32	121424.31	114229.65	118636.73
MW764	beta-D-4-Deoxy-Delta4-GlcA-(1->4)-beta-D-Glc-(1->4)-alpha-L-Rha-(1->3)-D-Glc;beta-D-4-Deoxy-Delta4-GlcAp-(1->4)-beta-D-Glcp-(1->4)-alpha-L-Rhap-(1->3)-D-Glcp	C24H38O20	662.2152	646.1956	0.8877	2.3338	1	--	--	C19965	--	1.0	-	-	179094.33	46243.17	61181.14	36507.85	61584.37	27157.18	57142.46	22574.48	44470.17	24239.2	35001.91	55967.26	680.99	32620.94	27739.59	36324.01	37820.09	37327.12	28211.6	30739.79	34661.15	36078.31	37482.16
MW763	beta-Cymaropyranose;D-Cymarose;Cymarose;2,6-Dideoxy-3-O-methyl-D-ribo-hexose	C7H14O4	161.0816	162.0892	0.6265	3.4134	1	579-04-4	--	C08234	--	1.0	-	-	17028.97	467.86	729.98	4122.04	1338.25	3878.81	2190.93	3183.52	1259.61	1050.88	33870.69	73095.38	513.62	31504.24	21692.24	34439.77	30746.19	12938.53	13209.42	140430.23	15637.41	15552.2	16147.68
MW760	beta-Citryl-L-glutamate;beta-Citrylglutamate	C11H15NO10	320.062	321.0696	0.9798	1.6105	2-MetDNA	--	--	C20775	--	1.0	-	-	471689.02	1065036.13	6092731.68	2074191.09	638333.68	1448481.35	635204.32	1414945.05	1338594.67	763742.39	1081033.64	1997953.85	1803885.2	1041513.16	981926.68	1044570.07	1008422.7	1025841.85	1027882.82	1649215.54	1445948.21	1452174.36	1444717.98
MW6616	beta-Alanyl-L-lysine	C9H19N3O3	281.1579	217.1426	0.6102	4.7478	1	--	HMDB0060442	C05341	--	1.0	-	-	74318.67	88923.17	48532.67	81495.92	152786.47	89465.58	144351.86	84292.31	36420.47	78006.81	135602.37	109097.14	36299.53	134238.86	131709.73	138655.42	122542.76	47651.38	55489.1	112992.61	115818.21	115383.82	115022.26
MW6615	beta-2,3,4,5,6-Pentachlorocyclohexanol	C6H7Cl5O	540.7954	269.894	0.6422	4.4282	1	--	--	C16181	--	1.0	-	-	242.91	1395.27	530.48	458.89	732.85	609.41	973.69	765.74	883.36	687.0	1981.62	6553.69	2911.19	463.98	1020.35	937.03	133.94	152.66	987.39	222.31	4813.83	4953.68	4942.44
MW726	azido-FTY720	C19H32N4O2	369.2275	348.2525	0.632	5.117	1	--	--	--	45133.0	1.0	-	-	260254.61	9358.6	2641.43	105064.89	7765.98	12573.99	4331.42	10002.76	191102.32	165374.14	78978.34	8961.47	29841.74	79837.0	77362.77	81197.14	79703.73	50262.2	49029.18	3871.52	93331.89	142110.24	136631.79
MW6404	androst-5-ene-3,17-dione	C19H26O2	333.205	286.1933	0.8307	5.7792	2-MetDNA	--	HMDB0062415	C20252	--	1.0	-	-	2650416.0	674388.61	1925954.95	2341425.67	2747093.88	5302645.31	2735140.77	10350296.89	4497729.49	3241026.9	1815430.8	365789.59	850413.55	1717425.7	2015256.83	2236266.97	2245284.37	2564112.52	3648536.34	41939.4	2121086.69	2370773.87	2209663.53
MW6391	aminocaproic acid	C6H13NO2	86.0966	131.0946	0.9212	1.336	1	60-32-2	HMDB0001901	C02378	3926.0	1.0	-	-	887396.53	1092053.01	834730.48	1263115.92	1202311.15	1284213.64	1248712.08	1017970.78	974950.11	798338.49	1553122.18	3105927.74	4031665.76	1676411.22	1858374.46	1762974.04	1576817.78	1168079.97	1436881.73	2336399.73	1918433.48	2009597.12	2006446.28
MW6380	alpha-Tocopherol acetate;Tocopherol acetate	C31H52O3	945.778	472.3916	0.5849	11.259	1	7695-91-2	--	C13202	--	1.0	-	-	1072693.45	1721316.96	697679.16	1467697.17	1618124.26	1792814.92	1429908.48	676627.61	1555727.26	1198362.78	235303.94	470798.98	556896.55	399044.46	555400.76	174460.8	433340.78	537911.38	479963.04	176226.53	1545098.25	1514355.03	1298992.01
MW6378	alpha-NADPH	C21H30N7O17P3	790.0613	745.0911	0.6052	5.5403	1	--	--	C20745	--	1.0	-	-	10328.24	340.8	198.38	139.62	3418.59	206.59	889.36	203.28	6345.97	205.53	42524.92	7708.17	960.32	34434.05	37327.33	35961.27	38912.72	7632.87	15915.19	16413.01	13945.97	13944.82	12801.07
MW6377	alpha-NADH	C21H29N7O14P2	704.0902	665.1248	0.5574	1.1148	1	--	--	C20744	--	1.0	-	-	33559.32	34685.64	45626.65	30317.64	29084.95	28475.82	39373.83	44689.93	10156.08	67418.06	32950.84	55480.24	17355.12	31465.34	43021.95	33809.66	35118.04	24602.37	27061.3	42678.15	42743.91	43003.35	43958.13
MW6376	alpha-Irone;(+)-cis-alpha-Irone	C14H22O	253.1801	206.1671	0.634	9.3088	1	35124-13-1	HMDB35631	C09690	--	1.0	-	-	80354.32	94397.03	97936.82	101978.75	110794.91	91374.17	108513.47	114371.58	96266.28	99023.2	101015.45	92415.02	71664.88	82582.23	83246.83	103205.95	80683.99	82567.8	85268.22	79894.95	88477.39	87188.0	86532.3
MW580	alpha-D-Ribose 1-methylphosphonate 5-triphosphate	C6H16O16P4	934.8689	467.9389	0.5963	5.1249	1	--	--	C20422	--	1.0	-	-	286.73	4277.68	5027.6	3926.57	4482.49	5462.36	4469.49	6008.29	271.88	6083.85	25863.84	834.29	231.26	23770.41	26350.36	24974.29	17816.58	2899.96	4895.87	1137.18	8186.41	8186.62	7950.85
MW581	alpha-D-Ribose 1,2-cyclic phosphate 5-phosphate;5-Phospho-alpha-D-ribose 1,2-cyclic phosphate	C5H10O10P2	272.9588	291.9749	0.5216	13.809	1	--	--	C20440	--	1.0	-	-	91371.46	81037.17	107975.87	87983.85	77603.54	147052.93	91740.76	111456.63	133386.54	68534.69	93208.26	111787.66	166146.65	260279.59	13916.03	99885.14	97651.39	52886.0	72233.54	63738.93	100049.44	110753.18	110180.06
MW577	alpha-D-Glucose	C6H12O6	161.0449	180.0634	0.9694	1.6026	2-MetDNA	492-62-6	HMDB03345	C00267	--	1.0	-	-	236238.29	142074.74	224344.4	207521.11	150865.68	305116.41	199426.44	247727.01	140542.16	337976.08	198268.04	82610.21	677245.68	149793.82	202905.33	191484.54	159725.37	223599.7	231158.37	63697.14	194902.73	196576.27	184527.09
MW575	alpha-D-Galactosyl-diphosphoundecaprenol	C61H102O12P2	1069.6703	1088.6847	0.5524	13.3763	1	--	--	C04507	--	1.0	-	-	74288.76	81407.19	62792.5	44118.59	54523.77	49275.17	39003.87	25826.9	12613.07	14397.62	10867.83	6981.38	15133.54	19793.57	56292.72	65792.21	43071.17	56797.85	61031.1	102090.14	60712.62	40286.42	65046.25
MW576	alpha-D-Galactosyl-N-acetyllactosamine	C20H35NO16	544.1887	545.1956	0.6242	0.8533	1	--	--	C04428	--	1.0	-	-	1887.55	3261.47	12458.39	3527.22	5069.66	8745.94	3180.71	6557.55	5261.54	6068.03	13496.61	4607.14	8776.77	14297.41	13061.51	16612.19	14782.36	15199.56	19161.66	4318.41	8865.41	8953.31	8266.6
MW6371	alpha-Antiarin;Antiarigenin 3-O-beta-D-antiaroside	C29H42O11	633.226	566.2727	0.648	4.7853	1	23605-05-2	--	C08847	--	1.0	-	-	34404.44	18123.97	37857.74	37218.06	28087.93	34267.39	25233.43	32186.98	38764.84	40945.87	1035.35	5288.59	4053.7	2539.73	1363.93	476.48	2134.18	1778.01	1967.03	339.8	6519.7	6499.63	6228.21
MW6370	alpha-Aminopropiononitrile	C3H6N2	141.1136	70.0531	0.6412	10.4008	1	--	--	C05714	--	1.0	-	-	3326588.19	1611644.82	8652607.94	8708065.47	3398930.59	3005735.87	3310153.25	3481269.82	9903887.6	2335041.31	1624579.36	3071402.09	2870633.22	1546551.19	3497511.1	4801503.0	1658076.32	2721505.17	3464294.27	2934774.92	5623856.4	5202652.51	4901869.78
MW573	alpha-1,5-L-Arabinotetraose	C20H34O17	1091.349	546.1796	0.5699	4.2005	1	--	--	C20572	--	1.0	-	-	402.57	97.98	56.46	253.55	50.64	127.54	82.38	250.46	244.97	81.81	5887.08	273.95	493.27	3551.95	5374.91	4796.32	4423.37	2024.01	2866.07	185.49	2989.9	2935.23	2930.84
MW572	alpha-(p-Methoxyphenyl)-6-methyl-2-pyridineacrylic acid	C16H15NO3	268.1029	269.1052	0.7377	0.8245	1	--	--	C15122	--	1.0	-	-	37990.98	19441.43	34857.84	63161.34	18543.31	39214.81	9039.56	26434.42	31649.1	32597.12	45259.54	54054.21	70748.98	45054.05	48310.69	43618.08	40866.3	23530.33	68856.35	28321.88	48061.03	48868.67	48849.83
MW6382	alpha,beta-Methylene ATP	C11H18N5O12P3	571.9728	505.0165	0.5002	4.0686	1	--	--	C13740	--	1.0	-	-	191953.69	72277.7	38999.31	70189.8	10519.66	44796.67	8969.33	5053.37	11264.7	14957.36	59203.45	69182.82	6922.79	52917.09	43701.33	59003.11	64802.47	62361.32	68327.34	72418.07	52525.98	52133.38	53272.38
MW6381	alpha,alpha'-Trehalose 6-mycolate	C44H82O13	885.528	818.5755	0.621	4.5266	1	--	--	C04218	--	1.0	-	-	5609.09	10960.1	11323.01	10215.93	9757.58	2616.35	5533.34	1446.09	8464.54	14874.19	4671.32	5685.53	722.25	4444.98	2928.51	3303.99	3066.42	4777.07	2858.31	2292.7	14505.58	13861.09	13644.35
MW6361	all-trans-Undecaprenyl phosphate	C55H91O4P	910.6806	846.6655	0.6245	4.1167	1	--	--	C00348	--	1.0	-	-	762.8	270.02	649.2	1666.96	428.6	1412.15	398.66	531.9	888.08	958.07	4935.21	30125.85	222.86	8521.87	5112.51	7429.63	12658.27	16889.34	12076.19	34950.43	13150.2	13018.22	12414.16
MW6353	albendazole	C12H15N3O2S	307.1218	265.0885	0.6096	1.3691	1	54965-21-8	HMDB0014659	C01779	793.0	1.0	-	-	40788.08	113987.15	156978.63	74717.53	145052.85	247415.7	141456.41	256721.07	61531.91	103742.67	1941.6	30517.35	19606.03	3967.96	5336.59	8952.8	4973.21	46925.63	53390.14	8219.91	32668.03	36073.61	36813.5
MW63	[Lys8]-Vasopressin	C46H65N13O12S2	1092.3814	1055.4317	0.6176	1.5443	1	50577	--	C07105	--	1.0	-	-	24863.53	51372.31	74080.12	45105.2	35074.87	33306.05	36980.24	51299.87	39890.0	27334.3	12480.59	58754.53	15126.4	4653.36	6874.63	10136.23	6131.46	20679.6	17116.29	51922.04	28179.36	27184.87	28284.94
MW61	[6]-Dehydrogingerdione	C17H22O4	144.0661	290.1518	0.7382	0.8255	1	76060-35-0	HMDB0029474	--	86292.0	1.0	-	-	37100.73	87371.32	79051.66	61889.54	67480.99	42007.06	68303.19	41430.23	44275.84	35403.41	38598.76	45686.14	32445.7	40818.87	42027.94	40342.92	40972.35	24782.24	23756.3	48626.2	39536.82	39000.69	38998.63
MW9786	Zwittergent 3-14	C19H41NO3S	727.5679	363.2807	0.6152	3.9575	1	14933-09-6	--	C11216	--	1.0	-	-	589.8	1915.46	1100.22	562.06	484.26	479.2	613.23	411.36	266.41	135.02	53804.18	7794.78	257603.05	47699.28	43381.26	53091.49	57458.82	51130.7	56609.62	13675.44	13511.98	14063.87	13592.9
MW9785	Zopiclone	C17H17ClN6O3	371.1015	388.1051	0.6949	10.7957	1	--	HMDB0015329	D01372	--	1.0	-	-	62981.03	48810.3	324529.4	49392.08	39596.71	389681.9	28848.98	44844.82	41508.41	34694.18	50973.26	46638.69	25065.05	40580.86	28802.69	43793.91	29542.33	34409.46	35015.35	27864.22	75337.73	70242.6	74670.38
MW9784	Zoledronate	C5H10N2O7P2	566.9824	271.9963	0.6224	4.8091	1	--	HMDB0014543	D08689	--	1.0	-	-	113590.11	78835.85	178052.93	124043.97	79370.08	128647.16	83857.25	96785.67	66330.3	156209.0	2794.48	8326.53	11010.57	5341.19	2924.19	1742.07	623.26	17426.64	15465.78	5149.32	26710.23	25590.62	25329.71
MW3092	Zizyphine F	C32H47N5O6	616.3523	597.3526	0.6101	9.6534	1	55839-64-0	--	C10016	--	1.0	-	-	50861.97	15552.18	36020.55	28204.94	29798.09	21981.17	19994.79	18568.72	6508.75	23657.88	40632.77	33456.38	6340.83	32506.51	25133.96	45556.8	37249.29	19712.03	13487.69	21802.42	50810.34	53040.91	53372.64
MW3091	Ziram	(C3H6NS2)2.Zn	322.9151	303.9175	0.5521	8.5984	1	137-30-4	--	C15229	--	1.0	-	-	311286.98	109131.78	127197.92	99798.47	112570.05	103195.92	115358.6	111974.68	112837.17	98831.52	102353.11	72788.6	78790.37	94593.1	100265.47	98110.02	72081.41	194662.96	24073.08	118494.3	118616.37	117727.81	114115.61
MW3090	Zinophos	C8H13N2O3PS	247.0305	248.0384	0.5967	2.4752	1	297972	--	C19036	--	1.0	-	-	34388.72	55873.81	47399.05	53120.76	135832.69	70249.68	105269.58	88335.65	75971.97	60719.75	18972.8	35714.9	8172.66	25189.21	20961.78	16204.5	16012.98	38155.8	57602.53	56750.15	49092.31	49734.31	52167.27
MW3087	Zingerone	C11H14O3	193.0868	194.0943	0.6309	7.186	1	122-48-5	HMDB0032590	C17497	71737.0	1.0	-	-	42745.05	70754.91	27849.97	60666.31	49766.05	41392.26	47699.36	47528.81	50330.64	43789.09	49760.31	44775.31	49713.83	45395.47	43985.14	41194.5	63495.24	49651.37	43726.34	47849.91	49285.86	50197.74	50259.32
MW3086	Zineb	C4H6N2S4.Zn	289.889	273.8705	0.5888	13.6751	1	12122-67-7	--	C15232	--	1.0	-	-	113473.5	115541.67	119206.39	121894.83	124936.83	122286.36	118760.49	105522.84	20306.65	124429.03	129830.47	121955.69	58824.12	127111.14	19500.39	34133.77	123573.75	34914.66	129279.13	108144.07	122967.43	122881.71	121094.91
MW9780	Zeaxanthin diglucoside;Zeaxanthin-beta-D-diglucoside	C52H76O12	939.5451	892.5337	0.6035	4.7347	1	--	--	C15969	--	1.0	-	-	87627.07	70535.33	95733.9	67732.04	75887.02	56738.75	81127.24	53041.46	109060.9	45041.99	3938.64	516.05	1492.5	4308.49	418.92	558.5	1090.26	7976.09	3940.96	10607.04	11992.86	12499.01	11576.12
MW9778	Zaltoprofen	C17H14O3S	298.0659	298.0664	0.6494	1.3709	1	74711436	--	D01547	--	1.0	-	-	2993941.56	2841287.84	1813799.75	2823633.72	1718119.77	1860556.9	2480796.5	2017731.69	1935094.89	1962838.81	839761.54	1588141.71	276510.88	670309.79	676593.99	866954.92	677291.35	797837.63	755381.12	1021972.63	1668287.7	1665702.95	1592037.86
MW3085	Zafirlukast	C31H33N3O6S	556.1896	575.209	0.819	5.0073	1	--	HMDB0014689	C07206	--	1.0	-	-	18982.44	9907.45	14445.55	18663.96	82770.01	52809.6	85741.07	56190.97	14879.99	100359.22	21606.7	2523.56	12234.15	18545.81	24438.71	23634.26	17604.33	19599.22	26213.75	1018.13	27979.7	27709.68	27879.87
MW3094	ZOXAZOLAMINE	C7H5ClN2O	204.9577	168.009	0.6488	13.4165	1	61-80-3	--	C13841	44056.0	1.0	-	-	113474.34	108472.88	113800.87	110534.92	169710.68	109541.92	99492.81	110430.48	118537.02	78037.73	50906.53	172474.35	99050.35	180687.5	170130.07	79456.81	121140.53	165753.35	91863.09	160154.03	116880.37	116990.2	114749.16
MW3093	ZOMEPIRAC	C15H14ClNO3	310.0643	291.0662	0.5843	1.0166	1	64092-49-5	--	--	44152.0	1.0	-	-	27485.23	21728.48	29639.09	37027.43	15461.51	18317.08	13298.15	22021.4	29055.04	25861.35	24170.79	24114.43	15457.17	29529.54	20630.42	27091.8	24494.02	27844.98	25215.27	17751.89	27594.15	28628.65	27387.84
MW9779	ZAPRINAST	C13H13N5O2	236.0935	271.1069	0.6145	4.4684	1	37762-06-4	--	--	44292.0	1.0	-	-	39958.35	20444.32	15099.25	23774.63	22982.07	30299.18	29391.88	25064.33	6968.67	14765.58	6744.35	17303.63	12578.14	5430.96	3191.65	7414.16	6195.03	4552.53	3398.56	10237.29	17933.8	19508.64	19368.13
MW9776	Z-Ligustilide	C12H14O2	208.1335	190.0994	0.6367	3.1064	1	81944-09-4	--	C16987	--	1.0	-	-	3363.34	3275.96	44672.88	16186.7	24917.42	13866.78	24711.37	7569.25	95312.5	15670.2	630.84	382.07	6686.23	269.46	2543.5	1936.23	220.29	5210.08	196.03	525.35	9922.31	9113.39	9710.81
MW9772	Yamogenin	C27H42O3	478.3293	414.3134	0.6417	13.3016	1	512-06-1	--	C08918	--	1.0	-	-	2266.79	3068.55	1787.71	1293.67	3148.32	2714.18	5312.3	12375.1	8083.5	9885.15	15450.42	6145.0	7502.26	6054.88	8212.03	6584.85	6741.08	7046.83	7471.68	9801.0	8869.05	10753.69	11881.8
MW3084	YM-53601	C21H21FN2O	373.1112	336.1638	0.5602	4.1615	1	182959-33-7	--	--	45622.0	1.0	-	-	18826.94	2106.12	9090.44	21692.14	22247.37	30564.77	19323.14	28210.87	12924.62	23545.01	2793.49	3724.91	3301.04	1887.81	3415.9	2642.38	2864.05	2430.95	2488.1	1518.14	12936.74	12613.58	12822.18
MW9775	YM-201636	C25H21N7O3	935.3483	467.1706	0.6449	4.9752	1	371942-69-7	--	--	45562.0	1.0	-	-	18869.75	944.15	17963.13	10987.03	25735.81	24900.15	23564.63	18438.71	21706.36	15704.48	809.07	555.21	587.39	1107.85	980.98	1508.73	861.31	1483.73	1204.48	1615.67	1768.09	1830.08	1843.53
MW9773	YC-1	C19H16N2O2	631.2313	304.1212	0.6317	4.7858	1	170632-47-0	--	--	64877.0	1.0	-	-	677029.89	262697.86	641404.8	507352.18	295742.45	416302.86	319042.66	397867.45	875739.41	565265.11	7360.63	52917.71	114519.2	3086.87	4648.62	15735.66	2984.4	74486.8	46235.62	4815.58	156575.38	156917.14	152694.7
MW9771	Xylometazoline HCl	C16H25ClN2	237.185	280.1706	0.578	10.0848	1	--	--	D00757	--	1.0	-	-	20951.54	29031.52	27206.81	27136.22	28135.25	17908.0	29052.43	28013.14	36472.14	34738.99	23360.54	32242.13	23638.62	23837.27	23782.78	21115.06	23732.52	26583.82	28351.43	26436.39	35278.96	34587.69	33802.91
MW3082	Xylazine	C12H16N2S	255.072	220.1034	0.5763	0.9043	1	23076-35-9	--	D08683	43371.0	1.0	-	-	21714.1	32265.98	53597.79	52629.79	43437.16	47136.69	53762.44	45894.34	41027.62	63234.21	34454.89	20988.92	52446.65	31930.92	32382.05	32310.32	35270.98	38578.1	40516.11	14131.95	41304.38	41344.52	41967.69
MW9769	Ximelagatran	C24H35N5O5	964.5661	473.2638	0.5126	4.5183	1	--	HMDB0015603	D01981	--	1.0	-	-	63507.27	20549.36	103858.44	142558.77	123133.53	69436.65	131015.87	73160.8	341652.58	204235.84	1280.98	1507.57	1887.12	1669.61	2227.58	1565.79	1568.47	4103.48	3774.99	1206.52	4290.68	3852.96	4347.21
MW9766	Xamoterol	C16H25N3O5	340.1874	339.1794	0.9639	4.9886	1	81801-12-9	--	C11775	--	1.0	-	-	952.19	1482.97	294.11	945.76	845.57	336.73	245.15	739.17	15234.8	16601.43	133769.47	101667.34	126623.75	129838.91	120180.63	130496.48	131533.94	32227.3	29947.99	200882.66	59307.62	58911.21	59294.87
MW9770	XL-184 free base (Cabozantinib)	C28H24FN3O5	546.1399	501.17	0.5732	6.3254	1	--	--	D10062	--	1.0	-	-	10.67	161.86	68.51	19.26	16.36	99.71	13.35	22.64	108.12	78.48	67.8	11.6	24.25	26.64	11.27	14.03	25.37	39.94	187.69	21.11	744.91	688.2	628.13
MW9768	XCT 790	C23H13F9N4O3S	579.0553	596.0565	0.5417	4.1439	1	725247-18-7	--	C15641	--	1.0	-	-	3415.66	8289.73	2275.48	2793.94	3818.66	1758.25	3248.74	993.3	6582.71	792.71	2031.18	1238.68	385.43	2255.55	397.25	2291.35	771.36	8398.25	7592.65	3002.5	9076.35	9123.44	8538.91
MW3081	Wyerone acid	C14H12O4	260.093	244.0736	0.6436	5.7356	1	54954-14-2	--	C08466	--	1.0	-	-	1369.35	843.36	295.83	520.3	785.15	612.33	440.91	215.52	494.14	1167.05	6829.98	10440.73	1010.68	8836.63	5384.39	9373.18	9345.99	2267.52	1327.8	19221.04	3273.65	3243.37	3413.09
MW3080	Wyerone	C15H14O4	295.0378	258.0892	0.6485	3.6216	1	20079-30-5	HMDB30947	C08465	--	1.0	-	-	176809.1	122692.08	100612.02	133740.74	130375.22	97559.46	138285.33	102682.74	118878.23	90575.55	93590.26	325936.52	121821.91	86309.39	114044.99	92144.52	102875.24	96273.44	92470.44	252352.56	141712.27	143323.93	143349.66
MW9764	Wortmannin	C23H24O8	543.0223	428.1471	0.6409	4.065	1	19545-26-7	--	C15181	45282.0	1.0	-	-	25449.73	4780.2	10777.0	7903.55	3888.6	510.76	1277.85	647.36	2139.39	7567.88	30048.92	29164.6	1547.02	39956.09	29266.85	29668.5	40776.51	29730.34	27396.94	56404.59	22407.77	22160.47	22288.01
MW3078	Wollastonite	CaSiO3	134.9232	115.9243	0.6494	13.2991	1	13983-17-0	--	C19550	--	1.0	-	-	134230.18	113478.22	119874.57	184801.24	102751.61	186447.53	108388.95	128101.84	143050.92	125770.28	173206.32	134988.34	151260.21	177410.21	133775.95	162494.4	176621.07	143285.53	178357.73	155336.32	112615.35	116239.19	113043.12
MW3077	Withasomnine	C12H12N2	183.0921	184.1	0.6912	4.5258	1	10183-74-1	--	C10625	--	1.0	-	-	54806.78	51804.76	56227.9	49413.54	47135.89	63180.83	849.15	62245.36	53999.12	64574.27	140075.39	59344.09	74642.71	137714.42	150122.41	149728.22	170773.73	12938.23	33355.15	3932.74	54726.98	56457.54	56394.45
MW9763	Withanolide D	C28H38O6	547.1857	470.2668	0.6369	4.0367	1	30655-48-2	HMDB03218	C08842	--	1.0	-	-	23342.91	5256.77	157.98	456.42	188.16	9538.9	174.13	88.77	10565.57	12161.78	91488.79	1204.96	30083.26	90842.32	84444.8	98892.22	97926.27	49003.06	44521.38	1262.01	39615.07	39534.06	39506.84
MW3075	Wilfordine	C43H49NO19	864.2748	883.2899	0.5539	3.9896	1	37239-51-3	--	C09992	--	1.0	-	-	41759.26	15484.34	16481.81	21659.87	14866.53	20067.66	21886.36	14233.56	30039.0	20347.5	74634.97	29764.41	1288.37	85533.45	71510.69	78038.33	91663.29	62283.58	58074.32	36384.0	43168.76	43320.23	43067.21
MW3079	WWL70	C27H23N3O3	474.1222	437.1739	0.8738	4.3611	1	947669-91-2	--	--	45314.0	1.0	-	-	89741.04	53892.98	81786.63	63504.2	53966.22	61656.68	51626.76	62510.15	57252.74	61289.44	68757.44	94600.23	58732.35	70608.75	73610.83	79633.79	78403.63	92914.78	87987.38	115271.82	81965.52	82355.83	81880.65
MW9765	WSP-1	C33H21NO6S2	667.9992	591.081	0.6074	3.969	1	1352750-34-5	--	--	96487.0	1.0	-	-	206.59	1069.58	260.86	123.16	757.85	87.62	818.23	137.6	281.6	863.94	395.52	4047.46	294.6	532.42	744.03	565.04	875.35	1756.55	1553.87	192.09	6100.51	6295.89	6267.57
MW9761	Voriconazole	C16H14F3N5O	721.2196	349.115	0.6387	0.7751	1	--	HMDB0014720	C07622	--	1.0	-	-	59616.91	165155.9	37487.8	45420.99	72274.84	42207.07	71329.62	43727.61	26939.16	28300.57	4182.95	4770.51	1742.14	5490.31	1001.76	1170.74	1540.54	1012.23	1323.77	1138.12	27014.95	27078.3	26308.36
MW3074	Vomitoxin;Deoxynivalenol;DON	C15H20O6	312.1471	296.126	0.5159	0.9987	1	51481-10-8	HMDB36156	C09747	--	1.0	-	-	822.18	680.07	263.0	1215.72	1480.64	741.35	954.09	2223.78	3180.19	253.75	17429.37	2568.33	27638.38	19145.44	17298.8	19152.86	21680.61	8038.93	7829.82	3046.62	7362.37	7096.41	7397.35
MW9759	Visnagin	C13H10O4	203.0663	230.0579	0.5571	3.7033	1	82-57-5	--	C09049	--	1.0	-	-	788467.35	847699.66	868059.53	785115.94	841677.43	849858.29	904789.41	897797.77	889631.59	895473.76	1085092.12	965521.74	2677689.17	917429.55	1116677.04	1194894.11	948262.32	778903.78	823864.89	1086691.87	128147.11	132231.01	125764.5
MW3072	Vismodegib	C19H14Cl2N2O3S	439.007	420.0102	0.5134	3.9187	1	879085-55-9	--	D09992	85191.0	1.0	-	-	5605.97	4502.64	17427.16	12201.62	11832.37	16664.87	11036.33	10233.86	6807.76	13569.73	2427.37	618.96	2080.18	2777.2	1795.13	1194.08	3166.39	1147.21	1298.38	2001.91	4831.87	5212.2	5284.05
MW9757	Vinyl chloride;Chloroethylene	C2H3Cl	100.9568	61.9923	0.7024	13.4417	1	75-01-4	--	C06793	--	1.0	-	-	1676044.29	1880824.56	1841482.64	1867774.44	1875326.99	643428.19	906641.1	1972483.6	1873166.96	723743.03	1861743.08	1825111.59	1757288.02	1739701.24	1765336.7	1740121.39	1721104.87	1686162.17	1702313.82	1719107.94	1397896.72	1253558.45	1342362.58
MW9755	Vindesine	C43H55N5O7	800.4222	753.4101	0.6213	4.9281	1	--	HMDB0014454	D06304	--	1.0	-	-	938.79	385.06	1192.87	2780.54	7201.88	727.81	5659.98	1002.8	544.33	2207.98	21991.61	62944.96	17268.54	30476.44	31116.29	42684.1	25874.06	77252.12	75005.4	38824.88	26459.86	26014.19	26595.85
MW9754	Vincristine	C46H56N4O10	370.2096	824.3996	0.5335	3.9536	1	--	HMDB0014681	C07204	--	1.0	-	-	429.3	5972.73	451.35	366.09	479.03	331.74	504.75	197.16	194.89	3247.78	11446.47	9538.79	13296.82	11709.95	13448.42	13034.98	11620.87	30689.27	30858.08	12474.55	24779.95	25014.46	25096.44
MW9753	Vildagliptin	C17H25N3O2	380.1146	303.1947	0.5869	3.8635	1	--	HMDB0015596	D07080	--	1.0	-	-	3237.9	3082.5	1539.93	128.02	869.4	686.92	350.47	143.08	150.4	132.01	28069.49	13764.86	17755.69	31410.79	28374.26	30852.17	36236.95	9655.85	1691.82	15186.54	3888.83	3945.26	4145.31
MW3068	Vidarabine;9-beta-D-Arabino furanosyl adenine monohydrate	C10H13N5O4.H2O	304.1055	285.1073	0.5964	0.786	1	24356-66-9	HMDB14340	C07195	--	1.0	-	-	282252.78	306965.44	237038.02	249525.63	186080.12	222920.26	195311.87	192409.65	175233.19	192472.34	173430.5	251413.69	105156.58	171900.08	173683.57	169679.8	173430.25	176493.45	170995.79	249583.02	224348.44	224325.37	225566.07
MW9752	Vicianose;O-alpha-L-Arabinopyranosyl-(1-6)-D-glucopyranose	C11H20O10	335.0949	312.1056	0.6469	0.8183	1	14116-69-9	--	C01625	--	1.0	-	-	21061.21	7777.26	39686.73	10906.55	7101.67	30667.63	9827.43	32082.22	13750.67	20551.3	50486.91	15651.05	64423.82	46739.33	49073.74	43268.82	38856.83	89621.5	93847.91	5587.74	35123.36	35222.43	34265.06
MW3067	Vicianin;(R)-Vicianin	C19H25NO10	448.122	427.1478	0.8644	1.1371	1	155-57-7	--	C01870	--	1.0	-	-	685943.65	1097794.87	806663.93	998266.07	871578.1	669368.25	698851.73	589386.63	833703.36	759519.1	637821.16	898954.33	353934.58	731404.12	719049.03	690915.8	736655.82	695903.38	724680.38	931134.26	869583.2	866304.29	890766.4
MW3066	Versicolorin B	C18H12O7	679.1073	340.0583	0.56	1.3285	1	4331-22-0	--	C20575	--	1.0	-	-	77425.26	254766.19	178019.58	461581.87	222031.21	240668.98	368958.17	247563.96	159438.9	513036.67	135427.68	304817.04	165724.23	269358.25	273450.97	142843.84	265457.85	122436.0	130281.05	102974.21	222537.41	236495.21	235508.14
MW3064	Verapamil	C27H38N2O4	473.282	454.2832	0.6427	13.2537	1	--	HMDB0001850	C07188	--	1.0	-	-	11298.67	5380.57	12227.43	22177.89	43212.27	10818.96	13476.29	11206.9	14302.06	14317.63	38653.84	14180.8	30849.24	33437.97	40796.91	51750.07	44070.75	26490.26	44527.77	37729.0	24248.76	25747.3	27118.0
MW9749	Vemurafenib	C23H18ClF2N3O3S	979.1478	489.0725	0.5143	1.277	1	1029872-54-5	--	D09996	85198.0	1.0	-	-	15992.17	42712.1	12000.82	31415.53	30167.11	14576.42	27763.78	12115.92	24616.41	6026.28	2144.08	16701.62	12028.15	2834.87	1372.4	4213.17	4802.97	8140.64	1824.96	16446.29	14512.18	14660.03	14957.18
MW9748	Veatchine	C22H33NO2	704.5373	343.2511	0.5964	4.0439	1	76-53-9	--	C06092	--	1.0	-	-	9710.69	2473.17	5351.51	5491.99	4071.02	784.63	3700.77	971.34	4484.73	2471.57	21564.36	12585.68	12446.26	46711.01	40641.96	32581.02	33995.95	66027.56	64153.9	16452.64	19613.01	19607.3	19792.76
MW9747	Vat Yellow 4;C.I. Vat Yellow 4;Dibenzo[b,def]chrysene-7,14-dione	C24H12O2	297.0698	332.0837	0.648	0.7916	1	128-66-5	--	C19545	--	1.0	-	-	9223703.87	13863748.39	3770594.05	15148393.02	4833129.92	12406133.5	4743812.95	12107050.39	5073827.14	4714406.62	2085702.17	2115419.43	3526557.74	2004005.33	4220021.02	2030737.25	1636770.96	1914152.84	1831689.75	2136474.11	3040293.33	3033033.03	3017543.04
MW9746	Valrubicin	C34H36F3NO13	688.2002	723.2139	0.6392	13.2092	1	--	HMDB0014529	--	--	1.0	-	-	5737.35	24567.24	36041.19	24248.85	17839.36	23796.74	651.28	1613.74	24404.7	60908.51	60497.73	45161.24	34604.82	31507.61	49032.14	68437.67	99346.61	116728.24	152467.55	129930.2	45646.83	60536.44	54837.86
MW9745	Valpromide	C8H17NO	166.1208	143.131	0.6094	1.627	1	--	--	D02766	--	1.0	-	-	12779.22	37314.12	606.85	844.07	8285.21	1497.7	9538.66	1454.29	692.8	879.47	1977.78	3176.87	46980.22	106.34	284.25	2949.16	3548.34	137.56	251.15	6571.66	9775.64	9793.45	9343.85
MW3061	Valinomycin	C54H90N6O18	1091.6101	1110.6312	0.5634	8.8808	1	2001-95-8	--	C06684	64667.0	1.0	-	-	11548.05	789.23	235.0	514.83	501.08	1046.63	628.03	1109.72	86.85	562.77	379.41	1640.48	558.9	517.9	310.95	711.4	688.11	353.96	339.93	1257.93	2901.77	2926.84	2926.03
MW3060	Validamine 7-phosphate	C7H16NO7P	256.0591	257.0664	0.6493	0.8584	1	--	--	C21216	--	1.0	-	-	74948.12	24510.35	88793.03	25540.1	53525.76	104150.29	72913.21	116095.27	50878.08	52839.13	10841.21	42088.84	12609.77	9581.98	14093.04	13616.54	10241.17	27518.3	18127.96	14423.33	35622.33	34692.43	35763.88
MW9744	Valeroidine	C13H23NO3	288.1811	241.1678	0.8577	4.3629	1	490-96-0	--	C10869	--	1.0	-	-	294434.18	113081.19	103457.73	226769.06	128744.24	134991.24	122448.38	141030.68	90478.3	89176.23	407084.12	309188.57	229385.27	409907.39	401549.14	422785.99	407984.72	242508.31	243735.76	372506.04	248398.16	249143.77	249417.14
MW3059	Valacyclovir;Valacyclovir hydrochloride;BW 256U87	C13H20N6O4.HCl	359.1243	360.1313	0.6234	3.1812	1	124832-27-5	HMDB14716	C07184	--	1.0	-	-	40627.1	4363.63	18337.5	16660.51	18175.99	27562.76	20079.52	21558.3	21808.1	9872.06	12617.73	8627.64	8969.91	11463.6	10540.15	10696.68	13826.26	12543.08	12376.61	8784.58	14720.35	14208.66	14022.64
MW3042	Val-Trp-OH	C21H21N3O6	821.2788	411.143	0.6487	0.9365	1	--	--	--	65022.0	1.0	-	-	19000.53	9066.46	13745.03	10539.14	8302.04	10263.45	9525.27	7680.86	11401.46	7756.89	5774.08	6592.81	2088.93	6192.01	4455.93	3399.66	4487.01	7537.55	7743.48	1094.93	12015.22	11569.63	11705.7
MW3058	Val Val Val Gly Gly	C19H35N5O6	450.2356	429.2587	0.513	4.1607	1	--	--	--	264532.0	1.0	-	-	125.4	1069.76	90.15	860.39	154.16	766.29	78.89	137.48	788.88	825.09	5877.06	1809.53	403.55	5780.8	6083.31	6524.15	6562.58	836.42	746.19	3930.78	2249.56	2330.96	2323.32
MW9743	Val Val Val	C15H29N3O4	653.4218	315.2158	0.6088	10.5569	1	185350-24-7	--	--	23186.0	1.0	-	-	10975.9	43865.49	28575.31	24070.8	29272.12	41504.53	35346.84	33098.81	513.48	22852.11	22485.74	54312.32	30701.87	27022.11	18690.57	25116.01	29215.88	28252.1	23175.78	44561.09	56904.39	55540.2	56763.14
MW9742	Val Val Lys	C16H32N4O4	309.2283	344.2424	0.6401	0.9023	1	73015-99-3	--	--	17111.0	1.0	-	-	132195.66	96320.15	57202.29	35379.76	35668.7	41137.31	35550.78	63574.12	27773.04	22376.69	56934.57	90082.2	44143.03	56688.8	51814.65	58388.47	58493.87	56894.13	50274.32	56691.06	68158.65	67891.76	67888.08
MW3056	Val Val Arg	C16H32N6O4	371.2415	372.2485	0.6291	6.0238	1	--	--	--	16915.0	1.0	-	-	358413.9	33796.43	271429.57	252775.78	168164.52	353877.12	175797.06	480135.78	364600.17	447991.76	227191.57	80965.36	68074.72	210678.41	203395.05	137973.43	232765.7	115668.61	113324.0	57901.02	245595.9	246542.66	247112.93
MW9740	Val Val	C10H20N2O3	217.1546	216.1474	0.6453	2.0579	1	--	--	--	23988.0	1.0	-	-	48629.68	56759.74	39139.27	44058.86	49413.64	42123.72	50761.14	39669.04	64236.6	47673.68	76018.04	52453.3	16916.95	73468.25	73530.72	80729.11	80613.69	67378.81	56622.95	62866.77	64545.79	64537.94	63968.09
MW9739	Val Tyr Trp	C25H30N4O5	950.4773	466.2216	0.6457	4.8982	1	--	--	--	19345.0	1.0	-	-	7497.12	4410.97	4477.38	1587.16	376.0	3166.9	2026.03	461.15	5021.6	687.46	24930.52	1088.68	1843.88	28582.36	34870.3	25144.75	24508.04	24385.05	29763.71	1859.17	8807.95	8795.16	8121.18
MW9737	Val Tyr Pro Glu Leu	C30H45N5O9	664.2915	619.3217	0.5812	10.6497	1	--	--	--	264694.0	1.0	-	-	126923.25	162837.16	164806.32	160639.02	108737.04	204804.04	186475.63	152068.59	9091.65	114038.14	52197.41	98246.65	36478.09	28611.73	33971.24	24922.58	38991.03	80694.24	64826.61	112171.29	143247.93	132303.14	141051.67
MW9734	Val Tyr Leu	C20H31N3O5	416.2153	393.2264	0.6232	8.3312	1	--	--	--	15800.0	1.0	-	-	28739.72	40940.81	19146.94	40320.72	158556.53	52789.76	32977.6	44768.87	16243.97	39444.92	20248.06	31378.04	48465.45	12169.62	20867.9	26692.17	16258.97	17987.52	11003.42	20884.06	30297.78	30426.93	29247.89
MW9733	Val Trp Lys	C22H33N5O4	449.2875	431.2533	0.6237	10.4156	1	--	--	--	17942.0	1.0	-	-	32.6	34.43	26.59	10.05	18.14	20.44	5.74	34.53	15.75	3.82	31.38	5.38	19.13	21.08	5.91	54.52	15.21	16.64	23.29	18.26	1166.38	1173.29	1165.05
MW9728	Val Ser His	C14H23N5O5	383.2037	341.1699	0.6499	1.909	1	--	--	--	16886.0	1.0	-	-	12127.92	945.56	5557.5	2499.12	3191.28	3132.54	1134.33	1416.14	3685.33	2308.32	7608.48	12266.04	11763.41	8143.49	8164.42	6621.47	12146.02	24280.57	13363.26	18575.6	6121.74	7570.66	7828.73
MW9727	Val Ser Gly Pro Glu	C20H33N5O9	526.1931	487.2278	0.6111	4.837	1	--	--	--	264407.0	1.0	-	-	282395.63	114891.52	448165.15	186144.38	231102.44	177121.98	250594.48	162012.95	399121.67	303113.08	817.47	14456.27	3905.46	2148.47	1642.12	1312.91	3848.65	26425.19	8250.42	4876.86	66774.89	68461.08	66174.64
MW3051	Val Ser Glu Ile Asn	C23H40N6O10	541.2623	560.2806	0.6241	4.2113	1	--	--	--	264911.0	1.0	-	-	15300.32	2092.78	3989.45	10704.07	11357.96	16009.24	12069.82	13256.24	8467.94	6976.49	733.89	641.75	838.96	1478.49	1757.47	1191.24	2095.32	1877.86	1178.12	1111.69	6661.79	6379.06	6426.16
MW9726	Val Pro Val	C15H27N3O4	278.1856	313.2002	0.5964	2.2186	1	--	--	--	16064.0	1.0	-	-	14663.99	18233.7	11199.57	15291.13	20341.12	6554.3	9812.43	7727.08	9778.04	11346.98	7599.28	15604.68	1880.65	7787.56	9119.12	7750.9	9674.75	8792.95	11203.17	29236.56	11899.4	13051.56	12110.08
MW9724	Val Pro Leu	C16H29N3O4	404.1352	327.2158	0.6301	9.9106	1	--	--	--	16547.0	1.0	-	-	19591.54	22412.12	21453.31	26401.34	27774.78	23377.52	22588.57	20873.81	25736.92	20328.39	19509.6	23963.67	18419.75	20641.93	18936.94	23559.74	18054.93	17763.08	21899.92	13516.23	20876.03	21575.15	20648.43
MW9721	Val Lys Arg	C17H35N7O4	841.5095	401.2751	0.5177	13.1768	1	--	--	--	19615.0	1.0	-	-	3644.64	5049.39	2353.53	4278.72	6709.46	14049.75	19636.26	37063.64	38532.27	27900.42	15791.7	17619.93	18574.01	22788.69	20811.66	19484.38	23357.64	20606.46	23633.7	18727.24	9018.92	13476.81	14831.73
MW9720	Val Lys	C11H23N3O3	491.3565	245.1739	0.57	8.0245	1	--	--	--	23854.0	1.0	-	-	30119.56	974.73	4649.97	3925.74	3800.12	14484.76	2202.14	8489.96	11878.06	3127.06	17239.19	18272.05	10977.42	16887.73	11942.56	20384.98	23205.92	7263.03	6793.37	30059.57	8834.26	9506.8	8316.95
MW9719	Val Leu Phe	C20H31N3O4	441.2474	377.2315	0.6398	5.0251	1	--	--	--	16183.0	1.0	-	-	3214.88	6357.14	1295.45	2394.26	11160.68	11880.46	12294.62	12595.6	1265.93	18112.15	2865.43	3578.47	476.7	380.08	2752.68	1005.18	2408.81	2026.96	2139.69	2670.48	3841.22	3863.6	3564.51
MW3049	Val Leu Asp Phe Glu	C29H43N5O10	620.2932	621.301	0.6229	4.6768	1	--	--	--	264828.0	1.0	-	-	15129.72	12598.41	21835.43	18279.44	21986.07	21870.14	23556.78	20483.94	31693.26	20152.38	20492.55	7094.84	79003.25	22999.35	21301.59	20377.5	21129.92	13819.53	19334.41	9551.07	20884.82	20721.84	20934.76
MW9718	Val Ile Pro Lys Ser	C25H46N6O7	584.3763	542.3428	0.6351	4.727	1	--	--	--	264643.0	1.0	-	-	4907.63	117763.85	157639.0	170750.06	175297.45	162717.89	157625.01	156737.86	151852.79	157027.58	11906.69	16917.64	916867.16	7763.77	15829.14	13059.19	2086.32	94194.53	121608.54	90438.96	133538.15	122678.74	134820.31
MW9715	Val His Lys	C17H30N6O4	347.2185	382.2329	0.6114	0.9933	1	510727-21-6	--	--	23511.0	1.0	-	-	28740.93	23427.11	46449.62	39416.48	21818.33	21175.81	65048.53	23966.07	18595.9	12554.27	1172.07	8316.78	10996.71	619.84	759.83	2958.62	942.04	1104.25	1907.94	3383.34	9059.57	9476.75	9243.02
MW9713	Val His	C11H18N4O3	531.2658	254.1379	0.6091	3.9731	1	13589-07-6	--	--	23909.0	1.0	-	-	358.3	1864.75	238.36	167.5	1025.93	182.61	1019.99	124.29	542.9	30.51	1388.38	17739.55	666.26	981.59	746.23	1089.85	664.36	1523.84	5592.67	789.79	6688.59	6712.71	6641.64
MW3047	Val Glu Tyr His Gln	C30H42N8O10	673.2966	674.3024	0.5798	10.0087	1	--	--	--	264177.0	1.0	-	-	12394.88	1223.26	1707.98	4543.63	2129.47	3298.12	1548.24	4382.38	2352.08	2086.46	9605.25	2424.09	9768.8	7993.98	8610.89	15074.79	13355.15	2976.69	2744.99	5965.88	8945.61	8939.4	8771.89
MW3046	Val Glu Pro Ser Asp	C22H35N5O11	544.226	545.2333	0.6496	5.0341	1	--	--	--	264671.0	1.0	-	-	2874.36	649.47	2599.91	7129.17	20978.78	21107.83	23730.4	23276.56	3468.11	30590.62	12913.58	439.19	6334.58	8796.88	5780.03	9858.07	10704.99	1237.62	6188.16	416.51	6314.88	6397.31	6322.97
MW9710	Val Glu Arg	C16H30N6O6	385.2192	402.2227	0.6335	1.6685	1	--	--	--	20838.0	1.0	-	-	69465.96	1952.57	36848.71	47478.51	3640.01	43376.65	24419.79	51122.53	38547.9	45666.7	80236.77	67579.27	285408.94	58134.77	69029.8	58484.98	46905.19	161852.75	94716.82	86090.57	11261.46	11850.63	11933.28
MW9709	Val Gln Ala Arg	C19H36N8O6	472.2758	472.2758	0.6182	4.2352	1	--	--	--	244693.0	1.0	-	-	149875.57	131483.81	131492.66	129976.43	130528.05	137314.59	134201.31	126539.39	133377.79	133906.06	124534.95	78689.55	65325.06	97566.54	120634.12	150724.21	144658.19	257751.7	242529.29	133550.04	68074.27	73091.05	72609.26
MW9708	Val Asp Pro Val Asn	C23H38N6O9	657.1432	542.27	0.5642	1.6686	1	--	--	--	264318.0	1.0	-	-	839.29	2553.28	47048.75	53916.66	12323.73	65887.55	7190.88	58470.77	4955.02	62301.07	12519.4	9277.12	5887.94	11655.12	13308.72	12348.72	11461.55	507.27	13078.38	10408.34	9277.07	8977.05	7991.86
MW9707	Val Asn Asp Lys	C19H34N6O8	987.4474	474.2438	0.5472	4.5183	1	--	--	--	243927.0	1.0	-	-	70980.46	68618.62	14306.16	85851.48	70402.65	61361.09	78543.24	48491.12	47333.35	13721.0	73372.63	88182.32	106081.15	85142.54	58592.19	114038.54	89456.06	95076.61	54856.54	159348.27	81662.22	81553.32	82242.83
MW3043	Val Arg His Arg	C23H42N12O5	565.3335	566.3401	0.61	8.8473	1	--	--	--	245213.0	1.0	-	-	67995.76	1204.33	1688.51	3326.86	1461.7	5952.43	3075.1	4814.51	12857.2	671.31	13298.48	6932.89	20603.28	11998.87	11622.66	14148.02	14613.06	20741.61	12705.97	7001.64	19056.44	19085.92	19407.26
MW9705	Val Ala Val His Val	C24H41N7O6	600.2305	523.3118	0.6258	4.9155	1	--	--	--	264140.0	1.0	-	-	161463.76	5829.84	97637.51	96846.55	87850.07	112316.65	73719.17	101180.44	174517.89	105838.72	2661.52	953.99	1292.45	782.18	1780.12	2910.07	2569.67	602.22	10096.47	5168.53	5127.61	5331.74	5371.32
MW9756	VINPOCETINE	C22H26N2O2	350.1994	350.1994	0.6151	4.2147	1	42971-09-5	--	D01371	44335.0	1.0	-	-	37347.67	46125.23	28199.4	17262.58	13776.82	34248.08	19842.11	28817.61	25175.95	24443.96	40434.08	10177.79	1284.54	47426.68	37134.46	27758.28	47204.31	73555.88	61289.57	10836.87	27282.83	25099.41	27029.82
MW9704	V-PYRRO/NO	C6H11N3O2	175.1191	157.0851	0.6436	3.7115	1	179344-98-0	--	--	62984.0	1.0	-	-	2129.41	2658.39	3066.12	761.92	3759.97	5003.94	2692.38	2969.88	4684.54	1334.93	69930.31	14110.68	189333.0	58787.15	54309.9	64475.0	68758.31	54198.15	36446.53	8152.07	20268.1	19742.41	20224.23
MW3041	Usnic acid	C18H16O7	360.1087	344.0896	0.6319	6.4967	1	125-46-2	--	C05153	--	1.0	-	-	343367.87	697.64	199243.64	222075.95	36813.75	144101.15	39313.63	160934.88	169039.33	253509.38	88709.44	211477.54	23876.89	78472.57	62649.57	105192.2	92584.71	68541.88	57292.24	128633.92	206008.26	210291.41	206840.11
MW3040	Usambarine	C30H34N4	469.277	450.2783	0.6312	1.6603	1	--	--	C09250	--	1.0	-	-	52057.85	32565.24	10493.88	54692.26	41919.84	19716.96	36951.82	22354.37	7202.85	7355.97	77808.4	7903.11	354303.93	85626.91	73246.95	79681.81	74937.01	70460.09	73372.03	67497.14	12642.46	12952.84	13135.92
MW9703	Ursocholanic Acid	C24H40O2	759.5698	360.3028	0.6111	4.1202	1	--	--	C19642	--	1.0	-	-	3338.65	799.98	858.21	7143.45	1567.6	2577.67	900.6	2152.77	834.96	510.6	22005.23	91592.07	195.34	28024.05	19488.39	27611.51	35197.54	44904.13	35990.26	95040.49	37847.18	37399.05	37830.05
MW9699	Uridine diphosphate-N-acetylglucosamine	C17H27N3O17P2	590.0765	607.0816	0.5593	1.5268	1	--	HMDB0000290	C00043	--	1.0	-	-	3008.17	9275.82	21332.8	27274.42	11828.75	42286.39	13182.89	27451.01	11787.74	14313.17	3785.47	3607.5	11350.57	8111.64	7293.72	4953.8	5164.58	10866.96	8834.83	2448.89	5071.35	5764.01	5593.97
MW3039	Uridine 5'-diphosphate	C9H14N2O12P2	423.0027	404.0022	0.5407	1.3283	1	--	HMDB0000295	C00015	--	1.0	-	-	89115.17	224096.94	175554.67	308864.93	158085.9	252424.26	215559.33	407138.02	134322.66	441116.88	151129.4	248907.35	471391.48	144453.14	217971.73	144030.8	172682.18	155600.61	162749.24	68597.71	200682.75	206704.2	219877.26
MW9698	Uridine 2',3'-cyclic phosphate	C9H11N2O8P	382.9442	306.0253	0.6315	4.0331	1	--	HMDB0011640	C02355	--	1.0	-	-	143.4	8613.07	790.18	2227.17	4999.74	1947.29	5250.98	1739.61	2633.7	295.67	231.17	6202.86	38112.0	2298.56	2928.37	2261.91	1590.2	3227.92	4336.49	1382.87	31832.69	31849.83	31449.32
MW3038	Uric acid	C5H4N4O3	335.0494	168.0283	0.9548	2.5917	2-MetDNA	69-93-2	HMDB0000289	C00366	88.0	1.0	-	-	74875.96	74056.33	3609.43	87015.13	95955.42	28895.98	105906.59	19164.36	321132.04	16887.92	22994.04	150824.56	39690.64	32153.04	43440.59	46513.1	47125.2	109531.54	72470.16	196366.98	79813.34	75487.59	78394.74
MW9696	Urea-1-carboxylate;Allophanate;Allophanic acid	C2H4N2O3	151.0352	104.0222	0.634	13.354	1	625-78-5	--	C01010	--	1.0	-	-	73446.59	123053.42	83719.1	84165.28	110448.19	87069.52	79300.11	79449.57	136661.3	101328.49	16298.44	84340.74	80250.68	88129.13	84955.98	79421.61	85720.24	87228.65	64076.46	71631.06	112387.71	111545.29	106023.11
MW3031	Urdamycin G;Aggreticin;OM 4842	C37H46O14	713.2806	714.2888	0.6119	0.8201	1	115626-67-0	--	C12414	--	1.0	-	-	18159.08	17898.74	13022.79	24511.68	28004.95	22709.48	30083.58	22577.3	26572.91	18372.06	23727.3	21676.5	24380.36	18932.37	20284.11	30794.88	21083.96	5156.74	9753.3	21879.32	20917.57	20896.59	20450.38
MW3030	Urdamycin F	C43H58O18	861.3589	862.3623	0.5186	4.1607	1	104562-12-1	--	C12411	--	1.0	-	-	3470.42	716.79	253.32	248.33	806.96	259.81	693.74	325.25	584.35	621.38	4444.38	27912.1	11299.75	2879.29	2332.88	7118.1	5744.68	4369.59	1822.55	26401.96	7252.25	7312.24	7530.55
MW9694	Urate-3-ribonucleoside;Uric acid ribonucleoside	C10H12N4O7	300.0698	300.0706	0.6228	0.8189	1	--	HMDB29920	C05513	--	1.0	-	-	60585.8	97717.42	84542.51	108438.61	30837.67	78698.53	78741.35	81893.74	74378.75	33932.77	28889.9	15670.0	30002.19	26368.12	21617.44	27437.89	30079.6	25933.83	31605.78	28831.99	53290.73	52525.99	52582.49
MW9693	Uracil 5-carbaldehyde;5-Formyluracil	C5H4N2O3	281.0514	140.0222	0.6237	12.5358	1	1195-08-0	--	C17206	--	1.0	-	-	25607.82	21414.32	77505.0	41099.25	28295.75	47114.23	42197.78	43196.37	46720.68	29247.67	13796.1	7965.17	10641.03	49737.85	16881.86	12142.89	10553.64	7528.11	7619.31	3005.08	78306.04	73026.39	67507.02
MW3029	Uplandicine;7-Acetyl-9-echimidinylretronecine	C17H27NO7	356.1711	357.1788	0.7024	7.6983	1	74202-10-1	--	C10412	--	1.0	-	-	20421.09	26249.82	14170.95	25821.27	18277.47	14109.45	22144.83	18369.73	18937.38	24969.21	17409.34	18250.73	19926.3	20698.17	17599.47	24810.3	25261.22	25824.92	18535.65	21937.65	26257.75	26184.16	25894.91
MW9692	Unoprostone isopropyl ester	C25H44O5	471.3317	424.3189	0.6477	10.4016	1	120373-24-2	--	D01452	45687.0	1.0	-	-	206.93	126.37	163.58	55.28	100.91	80.69	78.15	73.8	36.01	17.66	49.9	114.42	48.9	119.23	76.16	165.82	93.47	127.66	60.15	122.85	1352.32	1424.76	1428.31
MW3028	Undecylprodigiosin;2-((3-Methoxy-5-(1H-pyrrol-2-yl)-2H-pyrrol-2-ylidene)methyl)-5-undecyl-1H-pyrrole	C25H35N3O	374.2616	393.278	0.5382	6.0217	1	52340-48-4 13129-81-2	--	C12023	--	1.0	-	-	56544.38	26455.17	14042.42	25683.24	34879.06	64091.75	36091.0	64462.79	36400.57	56796.63	42353.93	3450.12	7618.66	36333.58	31658.12	42520.37	36802.31	13360.92	22729.36	1092.65	35413.22	35155.35	35075.35
MW9691	Undecaprenyl phosphate alpha-L-Ara4N;4-Amino-4-deoxy-alpha-L-arabinopyranosyl ditrans,octacis-undecaprenyl phosphate	C60H100NO7P	978.7312	977.7237	0.6437	4.7955	1	--	--	C16157	--	1.0	-	-	1431.79	1911.84	258.02	2516.52	2138.59	912.99	3580.06	2174.94	206.83	566.2	15884.18	24225.57	15931.93	18900.38	23000.52	21554.69	22971.46	5689.46	10069.48	29119.68	16283.84	16583.41	16603.81
MW9689	Undecaprenol	C56H92	841.6366	764.7199	0.5632	4.7842	1	15575-14-1	--	C01968	--	1.0	-	-	93187.99	13848.39	84643.6	54965.93	26671.07	44463.52	27136.42	44077.46	121353.05	68224.52	3841.47	3130.35	10058.99	4763.82	4049.5	4394.07	4844.57	3494.65	3734.54	8122.69	10978.46	10769.59	9901.71
MW9674	Ubiquinone-4	C29H42O4	531.2269	454.3083	0.622	0.7936	1	--	HMDB0006710	--	--	1.0	-	-	3039.92	6767.82	7860.83	2972.18	32494.48	2257.71	32308.1	3586.44	12427.45	17076.51	4432.34	4013.3	1194.13	3275.51	2874.04	3382.62	1928.6	385.89	301.57	9565.99	6609.81	6606.24	6684.57
MW9673	Ubiquinone-2	C19H26O4	637.3749	318.1831	0.5853	4.8283	1	--	HMDB0006709	C00399	--	1.0	-	-	50257.38	65255.18	70575.77	172696.28	80063.28	73757.46	85945.4	55421.19	39305.43	47420.9	15943.42	27335.05	115721.09	33901.61	21040.8	24239.86	42741.39	225926.36	234136.75	18377.54	352785.09	353752.4	342419.54
MW9688	UNC0638	C30H47N5O2	1057.7063	509.373	0.5681	4.9771	1	1255580-76-7	--	--	96443.0	1.0	-	-	4925.17	27366.65	25925.41	62613.7	35748.25	36831.31	29219.26	26723.74	3697.12	22896.7	26311.06	34764.86	9182.49	25669.55	38029.06	30433.75	34052.67	32773.86	46869.03	30366.24	35323.64	34720.63	35075.93
MW3027	UH-301	C16H24FNO	529.359	265.1842	0.5348	9.9941	1	127126-21-0	--	C11698	--	1.0	-	-	9005.52	309.68	672.79	1268.56	336.83	1595.21	508.24	682.8	661.22	568.1	5397.79	1640.17	3515.12	6176.59	3505.94	6157.48	6574.08	955.57	956.65	2679.44	4956.18	5004.11	4954.46
MW9686	UDP-xylose	C14H22N2O16P2	650.9181	536.0445	0.5843	4.1112	1	--	--	C00190	--	1.0	-	-	18429.45	2424.74	2678.76	27190.21	3857.82	16390.52	2585.39	13025.07	2412.05	2058.34	38498.16	199468.85	214.48	51560.57	42297.29	70292.65	61245.52	100864.69	84433.21	210623.04	88506.81	88804.87	88714.97
MW3019	UDP-alpha-D-galactofuranose;UDP-alpha-D-galacto-1,4-furanose;UDP-D-galacto-1,4-furanose	C15H24N2O17P2	402.9914	566.055	0.75	1.4534	1	--	--	C03733	--	1.0	-	-	57240.04	68398.95	97230.08	127330.9	69497.79	193177.83	63570.7	122250.52	111191.64	88960.8	86156.04	94854.93	59425.64	131190.96	59459.8	158531.92	168996.81	348197.95	270217.08	43354.49	127462.97	135673.96	135150.54
MW3025	UDP-N-acetylmuramoyl-L-alanine;UDP-N-acetyl-alpha-D-muramoyl-L-alanine	C23H36N4O20P2	587.0784	750.1398	0.7217	2.3418	1	--	--	C01212	--	1.0	-	-	85279.09	74488.3	89084.74	91832.52	173615.06	63911.51	182012.57	68638.94	114526.23	58986.75	48825.7	72997.7	5459.49	26216.73	31003.31	42152.93	40094.97	61559.52	62184.02	36954.46	92148.84	93090.87	92266.05
MW9684	UDP-N-acetylmuramate;UDP-N-acetyl-alpha-D-muramate;UDP-N-acetylmuramic acid;UDP-MurNAc	C20H31N3O19P2	680.1108	679.1027	0.7044	1.1078	1	--	HMDB11720	C01050	--	1.0	-	-	68270.29	226670.14	199294.52	174818.93	111649.03	194534.86	116886.47	109580.27	158091.49	160641.85	112005.46	144742.77	82738.38	112479.66	114265.84	324318.82	321571.07	399796.22	376386.97	126505.74	120035.51	120836.21	120872.29
MW9679	UDP-3-O-(3-hydroxytetradecanoyl)-N-acetylglucosamine;UDP-3-O-(beta-hydroxymyristoyl)-N-acetylglucosamine;UDP-3-O-[(3R)-3-hydroxymyristoyl]-N-acetylglucosamine	C31H53N3O19P2	856.265	833.2749	0.6213	0.7968	1	--	--	C04738	--	1.0	-	-	10842.58	24020.07	7810.3	12794.9	19674.13	5761.98	16594.29	5585.23	10005.89	13793.65	2846.61	13334.8	456.66	1293.06	3306.62	986.9	1650.11	454.86	1011.04	11200.31	6150.21	6309.9	6165.26
MW3018	UDP-3-O-(3-hydroxytetradecanoyl)-D-glucosamine;UDP-3-O-(beta-hydroxymyristoyl)-D-glucosamine;UDP-3-O-[(3R)-3-hydroxymyristoyl]-D-glucosamine;UDP-3-O-[(3R)-3-hydroxymyristoyl]-alpha-D-glucosamine	C29H51N3O18P2	807.2807	791.2643	0.5429	0.8162	1	--	--	C06022	--	1.0	-	-	202050.24	215791.75	141568.74	257532.77	359903.9	185462.27	357478.97	201755.07	224718.9	182369.15	50088.74	111141.49	85373.07	40980.6	56095.54	53205.25	53454.15	30726.94	36627.16	147433.27	122525.26	122941.59	124371.17
MW3016	UDP-2-acetamido-3-amino-2,3-dideoxy-alpha-D-glucuronate	C17H26N4O17P2	619.0691	620.0768	0.6279	4.6852	1	--	--	C20359	--	1.0	-	-	2139.99	5884.79	7696.04	6678.59	9372.6	14504.57	11274.75	15211.95	9827.19	9952.14	2313.61	2099.37	865.75	1692.28	3892.21	2761.0	2033.98	3627.75	5182.78	483.17	5526.74	5403.16	5444.71
MW3017	UDP-2,4-bis(acetamido)-2,4,6-trideoxy-beta-L-altropyranose;UDP-2,4-diacetamido-2,4,6-trideoxy-beta-L-altrose	C19H30N4O16P2	648.1327	632.1132	0.6401	3.9204	1	--	--	C19971	--	1.0	-	-	13776.07	4663.52	13974.28	15204.08	16996.98	10953.59	20402.44	6414.04	15301.3	12440.16	1464.64	632.46	197.34	702.89	947.68	2132.98	1553.0	2087.81	2005.34	397.92	5182.35	5038.86	5002.12
MW9676	UCM707	C25H37NO2	383.2819	383.2824	0.6452	10.4235	1	390824-20-1	--	--	45375.0	1.0	-	-	3568.17	59.78	3187.61	3789.96	3357.15	3855.38	3775.13	3869.44	158.43	4054.88	207.53	3048.39	166.56	86.53	1417.21	1961.84	2275.33	2974.14	3401.18	62.36	10940.21	10838.05	10779.04
MW9675	UCL 1608	C30H31N	370.2316	405.2457	0.6366	4.828	1	--	--	C13788	--	1.0	-	-	74549.65	2624.95	25848.18	1385.14	5410.56	41681.51	6354.92	39282.37	5014.02	20478.76	59164.16	1918.18	16620.98	59838.84	55212.3	57530.89	67519.31	48658.94	44573.83	33864.43	36524.31	36192.27	36513.42
MW3015	U50488;trans-3,4-Dichloro-N-methyl-N-[2-(1-pyrrolidinyl)cyclohexyl]-benzeneacetamide	C19H26Cl2N2O	349.1242	368.1422	0.6401	0.8693	1	67198-13-4	--	C11796	--	1.0	-	-	8042.62	4621.56	7552.24	16181.21	21719.95	11743.59	21502.43	11819.07	42461.52	10002.81	16274.68	29547.05	10367.84	13917.79	13122.22	15143.21	15197.17	13562.8	13757.86	30589.28	18411.25	18535.69	18517.8
MW3014	U-0126	C18H16N6S2	396.107	380.0878	0.6443	3.6215	1	109511-58-2	--	--	63075.0	1.0	-	-	33160.55	7895.47	3527.84	7443.31	5855.24	4646.32	9061.17	3772.48	5547.72	1655.9	6606.59	79387.35	11897.4	2975.6	8028.93	7405.76	9627.39	4528.21	8472.79	50780.51	10292.36	9560.64	9881.34
MW9671	Tyrindoxyl sulfate	C9H8BrNO4S2	381.8785	336.9078	0.6059	4.0605	1	74626-31-6	--	C17086	--	1.0	-	-	16541.01	475.87	536.23	3141.85	1494.46	1044.52	1274.66	791.38	2105.67	3657.82	9204.48	5639.43	10853.41	8568.84	5539.79	6420.08	6168.14	5442.41	4356.75	5367.8	19267.69	18965.02	18991.4
MW9670	Tyramine-betaxanthine	C17H18N2O5	444.9971	330.1216	0.8639	1.1103	1	--	--	C08556	--	1.0	-	-	230020.28	149457.53	192210.58	203600.94	85566.69	295287.61	86110.92	177636.02	153651.39	389952.37	539219.58	154903.37	171397.13	506275.57	427191.08	237162.83	235313.46	282702.86	684826.14	103265.22	270065.4	260482.91	283678.67
MW3013	TyrMe-Met-OH	C21H24N2O7S	469.1057	448.1304	0.6096	2.4006	1	--	--	--	65200.0	1.0	-	-	21782.21	10143.25	11921.37	8376.3	22961.36	9351.06	43798.57	11554.25	23528.47	6583.66	2804.09	6219.95	222.57	1576.92	1695.52	1465.89	1903.34	6148.22	5310.78	4782.05	12012.0	12254.35	11045.5
MW3011	TyrMe-His-OH	C22H22N4O7	438.1265	454.1488	0.9405	4.685	1	--	--	--	65220.0	1.0	-	-	884659.64	769902.27	1161923.05	943161.06	1142847.37	1418510.2	1124115.52	1273355.39	1541666.82	939129.45	1120623.34	607755.44	516396.31	1118098.35	1129111.26	1127602.43	1119650.48	1258678.15	1266171.45	499927.24	1247968.73	1253039.12	1255105.36
MW2987	Tyr-Asp-OH	C19H18N2O9	455.052	418.1012	0.5148	0.7552	1	--	--	--	65044.0	1.0	-	-	16858.17	21695.37	30050.79	24567.23	20149.01	23375.67	23059.82	22439.27	24641.65	25083.92	25179.0	20792.98	20696.6	24211.93	23936.44	24442.24	29396.63	31968.0	32799.62	15971.75	25273.39	25889.72	25676.94
MW9647	Tyr-Ala-OH	C18H18N2O7	451.0294	374.1114	0.5782	1.5373	1	--	--	--	64984.0	1.0	-	-	7158.51	2759.64	39481.68	40952.88	20089.29	76105.27	9609.84	74020.51	39984.02	66282.6	21507.98	17117.8	93422.94	23972.97	27291.64	10116.09	21506.5	18356.87	24448.53	3062.69	13604.89	15887.23	14641.33
MW3010	Tyr Val Lys Ala Leu	C29H48N6O7	613.3339	592.3584	0.6098	8.9058	1	--	--	--	264733.0	1.0	-	-	1676314.46	1107712.71	697541.99	837039.98	817283.49	1308560.99	865843.15	1016813.75	340373.09	878431.3	684373.1	1079131.46	813853.43	783817.19	597637.49	797412.96	898654.38	541147.11	485214.44	1025908.27	1401206.35	1395612.19	1391665.85
MW3009	Tyr Val Arg Pro Leu	C31H50N8O7	627.3644	646.3802	0.5539	10.6501	1	--	--	--	264801.0	1.0	-	-	175442.58	338239.69	297204.69	452527.09	225639.45	458301.3	249973.91	341465.48	8993.54	352712.98	80973.35	145243.9	136139.31	91549.82	98676.73	105653.6	88996.13	55813.76	88383.94	104523.95	331410.71	322586.42	318362.21
MW9668	Tyr Tyr Tyr	C27H29N3O7	584.1199	507.2006	0.6348	3.9979	1	7390-78-5	--	--	16919.0	1.0	-	-	860.04	1438.61	240.69	1080.44	228.9	220.77	504.57	234.27	202.28	553.25	22292.51	6308.69	1376.75	24152.99	16981.19	22133.92	22473.46	14367.84	11056.62	5631.47	5675.9	5802.94	5664.07
MW3008	Tyr Tyr Thr Glu Phe	C36H43N5O11	740.2972	721.2959	0.5535	3.9727	1	--	--	--	264077.0	1.0	-	-	71.07	633.2	45.33	435.73	534.08	50.53	556.4	57.3	1134.32	40.26	8937.02	100.86	554.48	7850.5	7282.07	8628.91	8478.44	6901.54	4896.78	178.01	2426.38	2356.33	2462.53
MW9667	Tyr Tyr Thr	C22H27N3O7	522.1042	445.1849	0.6403	4.2939	1	--	--	--	18125.0	1.0	-	-	253788.2	226728.19	164463.54	195272.02	101722.55	114075.83	85462.29	86120.04	34821.07	81479.35	752.6	38194.28	513.14	1243.11	469.87	3102.14	543.32	39849.37	55675.84	11857.19	36635.06	37432.29	35734.33
MW3006	Tyr Trp Cys	C23H26N4O5S1	469.1535	470.1624	0.5508	6.7997	1	--	--	--	16990.0	1.0	-	-	824063.38	7478.12	40352.97	77496.97	28534.01	151539.63	32427.43	543333.08	340496.82	73029.18	64841.88	1917.38	50904.49	84222.11	66605.31	73327.9	84665.05	115890.03	92135.35	569.41	74110.14	76045.11	76360.02
MW9666	Tyr Thr Val Thr Leu	C28H45N5O9	596.3296	595.3217	0.6195	4.6935	1	--	--	--	264343.0	1.0	-	-	143700.07	31104.03	95552.98	26938.85	104125.67	21996.17	110559.33	22546.45	138205.78	38049.93	1226.79	2280.97	20207.9	3015.65	6183.09	1828.15	2561.2	4229.49	5391.22	2999.65	8395.54	7754.29	8540.55
MW9665	Tyr Thr Phe	C22H27N3O6	493.2062	429.19	0.6231	4.3242	1	--	--	--	18327.0	1.0	-	-	88861.63	5653.05	8646.41	11343.72	4815.8	1014.23	3271.82	920.39	1724.74	399.3	43331.71	57271.14	224989.04	48381.17	50231.58	42419.11	37568.52	7062.26	4963.49	62376.46	18826.36	19111.15	18591.49
MW9664	Tyr Thr Gln Arg	C24H38N8O8	584.3153	566.2813	0.6444	4.1942	1	--	--	--	262153.0	1.0	-	-	107526.96	92678.47	99988.85	128313.44	51985.16	126137.33	46742.53	117580.14	12721.23	48347.15	26504.33	152043.38	55722.8	2368.42	852.18	26653.52	895.65	92987.45	89919.02	47131.77	93414.23	92527.64	92007.33
MW3004	Tyr Thr Gln	C18H26N4O7	409.1724	410.1802	0.6174	4.2908	1	--	--	--	16374.0	1.0	-	-	126.94	278.78	194.78	202.89	302.8	2446.29	185.52	3374.45	136.13	3601.26	18830.54	17223.42	17192.96	18297.35	16885.65	19681.22	18976.69	4039.65	2885.96	30071.76	9248.33	9510.63	9414.99
MW9663	Tyr Ser His Glu	C23H30N6O9	601.1595	534.2074	0.8371	1.2079	1	--	--	--	261602.0	1.0	-	-	22405.96	52495.03	268727.84	98662.72	29994.3	48746.5	29959.99	50810.43	83451.21	33775.0	47362.18	109380.47	36516.66	44738.61	45041.39	47359.2	44741.06	46069.88	49741.68	102508.75	76067.67	76661.59	76720.02
MW3003	Tyr Phe His Glu	C29H34N6O8	631.1941	594.2438	0.5694	3.9775	1	--	--	--	257202.0	1.0	-	-	242.83	180.7	183.57	495.65	105.91	8780.84	124.51	7614.29	9199.12	65.29	71310.61	1409.18	2071.42	54140.66	65180.6	74226.2	82728.75	46126.09	41350.38	657.77	24361.61	23706.42	23203.76
MW3001	Tyr Met Glu	C19H27N3O7S1	422.1393	441.157	0.6321	4.6851	1	--	--	--	17013.0	1.0	-	-	185947.93	193093.08	330263.12	259123.94	291721.36	417197.11	299802.63	391473.97	382763.2	283899.62	219786.26	132578.07	87732.13	211545.27	216605.01	228251.12	224376.57	238388.24	246076.81	110789.26	256525.5	256637.61	256873.66
MW3000	Tyr Leu Tyr	C24H31N3O6	473.2401	457.2213	0.6151	5.0102	1	--	--	--	16353.0	1.0	-	-	179968.0	42513.35	69066.82	76587.42	377957.38	250592.26	373437.66	241089.58	72753.08	505984.04	140013.9	16307.61	73090.68	135140.22	132280.64	131796.81	141006.87	125900.66	120970.64	1656.54	164401.48	165068.77	165147.71
MW9661	Tyr Leu Pro Ala Val	C28H43N5O7	638.2353	561.3162	0.6493	4.2933	1	--	--	--	264946.0	1.0	-	-	1800168.44	1665845.38	1258944.5	1488151.04	633130.31	800909.6	621135.53	700037.19	268246.84	598046.27	1100.9	303621.72	350958.63	125171.72	113525.03	964.03	976.92	306165.25	322489.37	156477.93	292869.68	294849.42	278822.68
MW2999	Tyr Leu Met	C20H31N3O5S1	462.1469	425.1984	0.6428	1.2867	1	--	--	--	16784.0	1.0	-	-	1689.69	1327.22	434.48	1810.1	2983.73	538.44	3171.37	3021.47	3116.21	1013.49	11654.21	17030.0	3616.59	8522.15	11883.02	13811.04	13036.97	3746.1	11711.83	19211.09	3906.31	4335.72	4484.2
MW2997	Tyr Ile Val Glu	C25H38N4O8	503.2508	522.269	0.6319	5.9729	1	--	--	--	258622.0	1.0	-	-	165542.15	4582.52	47193.89	69308.05	104994.54	114340.48	103768.86	95422.6	332863.24	79173.66	200827.16	9687.29	96434.94	191010.68	182593.14	150302.4	159335.15	101226.04	95145.33	792.0	129866.77	130432.92	134108.03
MW9659	Tyr Ile Phe	C24H31N3O5	459.2609	441.2264	0.606	5.024	1	--	--	--	15705.0	1.0	-	-	377598.59	47456.21	158790.84	242399.87	632954.34	711464.02	632398.8	690503.56	194117.31	1040225.61	380860.5	9861.59	138482.67	371261.15	372691.71	368258.74	368299.88	199881.86	219509.46	555.82	354187.74	351474.44	351399.42
MW9658	Tyr Ile Lys Lys	C27H46N6O6	589.3114	550.3479	0.6343	4.1141	1	--	--	--	258447.0	1.0	-	-	85458.48	358925.01	113132.1	300857.57	152480.8	119083.18	182615.7	97907.03	155012.43	54572.21	32920.85	3700.5	68201.12	36312.47	38583.99	2151.45	38794.01	25236.17	99016.55	1100.38	73527.55	70486.9	62941.05
MW2996	Tyr Ile Arg Asp	C25H39N7O8	602.232	565.286	0.5239	6.3637	1	--	--	--	258561.0	1.0	-	-	11011.15	197.46	1758.08	1708.37	3976.52	9698.97	3611.07	5191.59	14759.31	2453.06	1292.46	169.54	7065.66	1429.51	1521.47	792.87	1283.28	2593.33	550.68	128.73	6998.91	7138.14	6979.01
MW9657	Tyr His Ile Glu	C26H36N6O8	525.2447	560.2595	0.5993	3.9336	1	--	--	--	258022.0	1.0	-	-	389.62	615.28	489.11	1216.85	272.03	269.11	159.19	442.68	2806.56	2237.26	16286.54	16588.85	45803.6	18725.27	20352.64	20804.0	17513.82	2462.51	3764.42	6555.8	3763.76	3614.83	3054.32
MW2995	Tyr His Asp Asp	C23H28N6O10	519.1552	548.1867	0.6071	4.5189	1	--	--	--	257921.0	1.0	-	-	17824.81	573.59	1153.52	7803.88	12960.16	10019.33	14350.06	12078.48	11714.34	13241.1	74859.24	1289.71	25150.45	76817.29	49967.6	70368.33	80437.35	1827.66	1524.53	6984.12	7561.56	8269.84	7887.81
MW2994	Tyr Glu Tyr	C23H27N3O8	945.3518	473.1798	0.6325	0.8089	1	--	--	--	16574.0	1.0	-	-	3374.26	363.3	2850.59	2666.32	2267.88	5696.18	3767.46	8121.75	5879.47	3739.95	7802.33	8256.8	8753.39	5927.1	7567.81	4836.35	4508.35	1772.99	2744.71	5296.12	8695.58	8517.88	8702.13
MW2993	Tyr Glu Asp Tyr Val	C32H41N5O12	686.2654	687.2752	0.5442	8.906	1	--	--	--	264827.0	1.0	-	-	95679.82	57075.41	56840.27	47342.63	16557.94	61172.03	30413.58	39477.19	6395.93	46910.45	33416.6	53473.32	72793.74	51392.55	65619.37	46043.11	48765.98	39297.92	32006.59	64557.27	47612.44	50102.96	54008.18
MW9656	Tyr Glu Arg Arg	C26H42N10O8	737.1942	622.3187	0.6279	0.7794	1	--	--	--	256973.0	1.0	-	-	13051.75	104862.93	13264.29	29541.39	44083.5	28018.29	40215.88	28016.69	11545.01	13095.24	3047.42	4318.76	951.2	1280.93	2857.32	1582.82	2553.94	1250.0	738.36	3072.53	11711.15	11560.96	11588.11
MW9655	Tyr Gln Thr Lys	C24H38N6O8	1094.5829	538.2751	0.6139	5.191	1	--	--	--	261007.0	1.0	-	-	330.16	1056.81	699.8	243.5	383059.12	257744.43	391654.48	307770.39	452.18	1013920.13	86890.87	137161.83	16220.79	81328.8	78735.97	73961.3	76040.93	85766.1	130013.5	87944.48	129260.74	129291.18	128273.06
MW9654	Tyr Gln Arg	C20H31N7O6	430.2195	465.2336	0.6328	2.4748	1	--	--	--	23032.0	1.0	-	-	949.49	243.49	146.79	334.62	129.5	577.07	282.4	154.95	155.82	217.44	22546.03	20518.73	82081.76	22475.21	26575.65	26795.82	19321.37	12454.86	9603.32	16785.8	13865.38	14102.59	13847.85
MW2991	Tyr Asp His	C19H23N5O7	470.1037	433.1598	0.6453	1.1113	1	--	--	--	15968.0	1.0	-	-	924913.97	472541.35	619487.65	772375.52	693600.29	671914.42	432897.72	624655.69	862862.69	421078.71	427502.08	620809.4	459283.79	391194.79	477298.29	457693.09	429479.24	758073.48	553566.28	481352.57	582531.02	612486.4	615469.74
MW9653	Tyr Asp Arg Arg	C25H40N10O8	675.2548	608.3031	0.5774	4.918	1	--	--	--	256573.0	1.0	-	-	74981.21	5677.15	57795.88	54236.45	36040.98	65136.27	33145.07	57237.09	89359.25	60517.81	3551.38	1849.45	2007.55	762.04	1793.33	671.7	1321.29	1661.51	1794.75	1111.99	9260.73	9496.4	9457.33
MW2990	Tyr Asp Ala Asp	C20H26N4O10	963.32	482.1649	0.5724	4.1614	1	--	--	--	256281.0	1.0	-	-	59685.62	1381.87	12697.52	4176.11	15054.12	9867.55	16274.84	452.92	67534.37	577.43	659.32	9165.41	237.69	877.32	300.71	378.63	2210.93	776.16	801.92	8703.21	10857.23	10494.26	10860.53
MW9651	Tyr Arg Lys	C21H35N7O5	483.305	465.27	0.5771	4.6585	1	--	--	--	20256.0	1.0	-	-	6257.68	448.93	3650.46	686.48	1197.6	2931.59	354.31	972.23	4463.52	4148.54	23692.77	8587.81	5109.57	23775.25	21474.52	24083.82	21674.17	6235.63	7781.51	1712.62	5581.06	6021.58	5819.94
MW9649	Tyr Ala Leu	C18H27N3O5	407.2287	365.1951	0.638	2.1254	1	--	--	--	17388.0	1.0	-	-	51673.97	26439.82	3735.95	14725.37	17650.49	16705.51	11104.33	14571.26	12923.95	3105.42	211509.34	91397.33	216352.62	226712.76	283689.29	327269.77	120958.4	210741.97	59715.05	174771.96	84306.7	86859.01	75415.75
MW9648	Tyr Ala Glu Leu Arg	C29H46N8O9	651.3466	650.3388	0.6227	4.1131	1	--	--	--	264972.0	1.0	-	-	2102.39	32243.31	3322.33	6692.57	1498.09	3002.07	1845.99	2794.43	277.89	1823.27	22039.53	98112.55	37475.56	29091.12	11973.67	31594.55	22371.31	47064.24	41412.82	97902.05	41545.95	41961.55	42129.43
MW2988	Tyr Ala Arg Asp Glu	C27H40N8O11	671.2833	652.2817	0.5303	10.069	1	--	--	--	264834.0	1.0	-	-	33137.69	3971.11	8212.28	13547.69	4110.44	13290.38	3971.46	8804.79	11701.56	13084.81	20534.27	21430.1	21686.2	19115.49	18493.52	26356.77	28369.03	6758.0	4599.2	24920.05	19267.23	18342.83	19162.69
MW2984	Tumonoic Acid H	C26H45NO7	464.3014	483.3196	0.6263	6.4714	1	--	--	--	65436.0	1.0	-	-	14094.77	333.28	1034.78	822.48	143460.29	106982.07	143625.44	96491.64	54473.83	158798.91	23691.23	16237.44	15716.15	22410.34	23558.55	25141.68	23721.82	5525.94	3089.6	14344.09	45815.01	45921.15	45299.48
MW9642	Tuliposide A	C11H18O8	325.1133	278.1002	0.6268	1.5098	1	19870-30-5	--	C08561	--	1.0	-	-	2526.93	2420.83	13310.93	10719.43	1614.06	16874.1	1190.8	16479.64	5892.76	15745.47	1632.0	3088.09	2714.05	2122.29	1382.24	883.83	926.87	4464.62	4938.52	2995.58	4216.9	4209.7	3882.95
MW2983	Tubulysin D	C43H65N5O9S	846.4376	827.4503	0.5777	11.2399	1	--	--	C15704	--	1.0	-	-	103525.74	64227.04	34802.88	37157.22	26325.39	30384.94	23753.41	24913.44	29719.72	25578.82	1660213.77	1314318.35	222030.97	436223.99	215696.28	217361.89	211478.42	116554.17	86396.48	98148.11	153133.58	160488.17	122251.9
MW9641	Tubulysin B	C42H63N5O10S	847.4623	829.4296	0.6038	4.7758	1	--	--	C15703	--	1.0	-	-	83007.9	40175.1	137249.95	92293.74	93672.32	104539.9	78119.48	90995.75	125585.47	102771.86	3687.83	623.0	39522.73	3583.22	4944.89	1542.24	5239.01	11028.75	3984.31	4217.22	12776.66	13686.93	12308.73
MW9640	Tubastatin A	C20H21N3O2	688.3612	335.1634	0.6239	4.0687	1	--	--	--	64761.0	1.0	-	-	1237.65	1334.58	1046.75	1739.23	330.69	662.94	530.46	450.46	599.42	457.54	26865.59	7893.24	4906.41	26219.43	23627.33	26970.0	26341.26	3253.94	1395.92	29996.42	14320.24	15004.32	14592.97
MW2981	Tryptophanol	C10H11NO	142.066	161.0841	0.6366	4.5765	1	--	HMDB0003447	C00955	--	1.0	-	-	26870.4	25758.12	17299.26	10166.96	19489.64	10006.8	21424.07	20987.85	22651.5	11562.93	3182.13	8292.48	4027.07	1540.18	4886.4	6234.7	3146.62	5660.56	1791.16	6771.51	12305.3	12049.21	12122.38
MW9637	Tryprostatin A	C22H27N3O3	381.2045	381.2052	0.6368	4.0801	1	--	--	C20607	--	1.0	-	-	44.44	1014.59	123.64	138.71	560.6	132.48	438.92	109.49	690.94	98.4	158.15	504.6	8299.28	128.3	80.54	39.94	104.65	295.53	571.3	36.57	4635.51	4653.91	4666.41
MW2968	Trp-Phe4Cl-OH	C26H22ClN3O6	544.0694	507.1197	0.5871	3.6216	1	--	--	--	64964.0	1.0	-	-	36071.45	16889.77	9562.3	16409.35	20625.81	8536.52	18444.84	9694.96	15799.45	4349.8	11051.87	74795.94	17740.47	7678.72	13805.88	7119.19	9977.41	12690.02	12100.85	49094.08	21114.23	21264.22	21436.88
MW9620	Trp-Nap-OH	C30H25N3O6	568.1452	523.1743	0.6259	4.6097	1	--	--	--	65332.0	1.0	-	-	71021.39	18884.38	40501.15	11018.2	22926.73	8177.84	31897.59	9762.65	86771.02	41960.74	5158.87	6474.71	10978.37	1424.06	1336.92	3285.47	1324.44	3250.81	793.8	7600.06	4665.35	4655.72	4270.39
MW9618	Trp-HoPhe-OH	C27H25N3O6	534.187	487.1743	0.6427	0.7877	1	--	--	--	65352.0	1.0	-	-	22670.74	139415.32	32439.25	40238.92	61201.07	21414.95	72617.21	22587.92	16012.62	33977.88	1628.21	11897.54	2797.12	1856.23	1578.21	537.93	1149.83	9843.42	1801.85	10473.38	13566.68	13810.49	13793.38
MW9617	Trp-Ala-OH	C20H19N3O6	420.1166	397.1274	0.642	4.0644	1	--	--	--	64985.0	1.0	-	-	117312.11	1568.91	45608.76	25825.92	44429.88	1850.08	50325.55	259.26	194909.24	1986.18	11883.77	18597.78	24492.78	7258.9	11683.88	443.75	643.47	532.55	5502.15	21465.59	8474.13	8560.07	8199.82
MW9634	Trp Val Gly	C18H24N4O4	361.1871	360.1798	0.6493	4.0225	1	--	--	--	18336.0	1.0	-	-	25.69	1020.22	128.99	37.14	194.4	97.2	254.36	55.6	300.63	248.63	291.41	212.03	1664.25	31.05	346.79	106.57	381.37	665.78	603.16	96.41	3205.03	3258.27	3263.07
MW9633	Trp Val Asp	C20H26N4O6	495.104	418.1852	0.6267	1.1416	1	--	--	--	18530.0	1.0	-	-	468008.22	127812.13	96071.69	57372.17	111507.54	46760.23	35463.68	42335.3	127010.84	72492.49	87653.26	104562.62	14669.15	97314.76	110401.77	207468.36	108952.83	93010.82	129019.68	100145.63	104679.03	105974.07	105454.37
MW2979	Trp Trp Val	C27H31N5O4	488.2313	489.2376	0.5875	5.0167	1	--	--	--	17755.0	1.0	-	-	31784.77	2876.15	2047.32	22113.47	57787.76	21183.32	34454.46	22845.88	836.59	26267.49	41042.96	13920.67	7512.88	42526.15	59809.46	37650.44	59700.87	38391.56	45811.63	13205.81	34985.72	33892.07	36162.77
MW9632	Trp Trp Lys	C28H34N6O4	1054.5646	518.2642	0.581	5.4655	1	--	--	--	18683.0	1.0	-	-	6634.43	23112.0	6845.2	6359.53	22546.95	4834.85	25165.2	2596.25	6525.11	10178.16	75445.68	69475.96	9926.7	74826.95	72602.81	64974.46	65611.86	11050.69	25192.65	74631.51	41374.88	40406.09	40270.46
MW2978	Trp Trp Gln	C27H30N6O5	555.1742	518.2278	0.5366	4.0456	1	--	--	--	15699.0	1.0	-	-	1867.56	588.2	671.99	1833.4	1238.49	657.36	183.33	836.59	1322.95	989.06	11773.57	11004.63	26812.7	10608.67	14911.12	10424.32	10050.07	3197.4	3224.03	4011.03	5486.31	5779.05	5692.14
MW2977	Trp Thr Lys	C21H31N5O5	432.2238	433.2325	0.8	5.4745	1	--	--	--	16885.0	1.0	-	-	1456405.79	430865.78	710359.29	1129403.21	2441823.08	3914959.91	2577984.01	2787225.78	2240560.52	1931961.16	1325156.16	321791.71	266297.09	1142746.2	1247295.03	1203336.94	1211329.66	493069.89	835603.69	45076.42	1879689.48	1898460.87	1880385.31
MW9630	Trp Ser Lys	C20H29N5O5	419.2157	419.2169	0.8526	0.785	1	--	--	--	22695.0	1.0	-	-	1221273.11	2472267.0	860362.68	1558606.79	2623364.01	898556.98	2664873.28	976401.17	1324739.41	688268.27	834149.67	1658662.74	639676.39	830758.98	816680.41	735372.68	680664.73	262260.41	281287.61	2429210.89	1148940.76	1142887.87	1152482.35
MW2976	Trp Pro Trp	C27H29N5O4	506.2194	487.222	0.5648	0.938	1	--	--	--	22171.0	1.0	-	-	14746.5	23928.89	22315.01	15232.64	16002.48	9158.73	15360.44	11831.78	11176.95	12381.13	17026.26	25240.11	7135.99	14779.49	16140.56	16128.71	14929.22	12737.88	10847.04	19284.53	16459.54	16022.78	16478.8
MW2975	Trp Pro Leu	C22H30N4O4	433.227	414.2267	0.5541	5.4744	1	--	--	--	15797.0	1.0	-	-	344936.81	101071.01	170264.98	247099.83	539792.91	862372.77	595423.98	628027.61	483714.66	463958.24	303383.62	70996.68	78079.15	265879.37	298303.29	290451.87	275818.93	104030.43	195444.07	5916.51	442358.9	446168.58	444159.08
MW9629	Trp Phe Asp	C24H26N4O6	466.1848	466.1852	0.6432	1.5237	1	--	--	--	16805.0	1.0	-	-	16814.17	15507.88	16213.53	14653.29	16798.7	16471.33	17480.31	17051.88	15712.79	16913.99	47128.86	5092.93	39671.35	35254.55	39216.9	40858.2	18876.27	7194.83	3373.56	7206.69	7597.72	10793.12	12030.38
MW9628	Trp Phe Ala	C23H26N4O4	422.1944	422.1954	0.6119	4.8039	1	--	--	--	19590.0	1.0	-	-	571.33	394.07	2429.05	1742.69	339.23	427.99	1665.82	273.38	2867.69	3546.18	18453.36	27143.3	8043.21	16923.19	15736.4	16030.66	19588.36	4027.63	4222.94	17956.66	6355.19	6487.13	6318.25
MW2974	Trp Met	C16H21N3O3S1	354.1298	335.1304	0.6091	4.2365	1	21438-63-1	--	--	23836.0	1.0	-	-	3083.93	3605.89	896.45	2308.15	7345.15	1807.93	1846.0	157.33	1542.07	326.66	77875.78	56960.97	79908.1	80131.65	84646.12	81118.26	80791.83	78864.13	53956.92	79536.92	43609.27	46082.41	44883.95
MW9627	Trp Lys Phe	C26H33N5O4	556.1723	479.2533	0.6487	0.778	1	--	--	--	15988.0	1.0	-	-	201307.33	319304.46	122024.17	245384.44	267620.93	123949.04	257800.44	137152.98	124137.64	118085.1	22793.24	82282.35	28896.69	27573.12	18950.95	28109.48	27162.21	23507.14	28412.14	43156.87	89812.8	89455.42	90449.87
MW9626	Trp His Thr Ile Ile	C33H48N8O7	651.3604	668.3646	0.6065	4.7794	1	--	--	--	264303.0	1.0	-	-	58837.8	29452.53	78993.03	62476.64	49178.83	81429.12	75420.39	34682.23	66756.54	58724.84	1649.53	7211.44	22372.12	866.91	2128.89	3066.02	813.81	20348.65	6724.79	4178.16	33592.72	33705.97	30630.58
MW2972	Trp His Lys	C23H31N7O4	450.2244	469.2438	0.5508	7.5841	1	--	--	--	21109.0	1.0	-	-	71232.35	770.81	11618.28	25365.28	2888.64	40756.03	2046.09	25020.79	27867.45	1381.81	12607.95	276.24	49557.6	8235.98	8113.46	9802.75	14496.71	23705.1	1332.85	14089.55	35098.44	35191.77	34890.13
MW2971	Trp Gln Val	C21H29N5O5	430.208	431.2169	0.7943	5.383	1	--	--	--	22571.0	1.0	-	-	721294.02	244978.72	236203.33	344129.17	752000.04	933698.37	786051.81	960460.27	686985.41	545894.26	347319.1	96318.13	149230.08	326185.5	335542.07	319769.05	303494.25	423546.35	514404.5	14864.71	557844.52	560736.1	560518.92
MW9625	Trp Gln Gln Asp Glu	C30H40N8O12	768.2899	704.2766	0.5537	4.9337	1	--	--	--	264551.0	1.0	-	-	113767.86	4607.7	48517.02	34293.5	21602.98	70580.37	37268.15	43095.65	89872.43	57801.65	703.24	3201.39	6190.76	1641.46	2850.45	890.54	2354.73	3921.06	1489.11	555.58	6624.02	7005.11	6484.1
MW2969	Trp Gln Gln	C21H28N6O6	459.1996	460.207	0.6426	4.1682	1	--	--	--	17761.0	1.0	-	-	215.55	6964.33	150.5	4682.82	126.14	4964.44	87.1	280.16	6961.42	88.86	41102.02	33218.58	37045.46	40251.1	40353.86	40120.41	48984.29	8453.17	11013.45	59189.08	22059.11	21986.27	21985.14
MW9623	Trp Cys Phe	C23H26N4O4S1	569.0432	454.1675	0.608	4.0687	1	--	--	--	18169.0	1.0	-	-	17754.85	5341.5	11409.64	5636.2	2160.46	962.87	1345.2	1855.49	4233.69	5168.54	19274.2	22276.78	4027.76	27721.27	20428.55	28242.38	30757.0	7182.92	4831.86	27368.2	16958.41	17131.54	15958.62
MW9622	Trp Cys Asp	C18H22N4O6S1	537.0032	422.126	0.532	6.5954	1	--	--	--	17549.0	1.0	-	-	25.84	483.93	49.06	153.49	222.09	52.33	31.74	59.21	314.51	32.55	234.07	793.72	342.87	47.69	52.64	24.07	101.92	252.4	226.98	559.97	2278.97	2385.61	2250.54
MW2964	Troxerutin	C33H42O19	758.2532	742.232	0.5731	4.182	1	--	HMDB0006083	D07180	--	1.0	-	-	244655.68	13808.3	101573.84	76335.21	85683.87	14855.74	73068.16	12242.03	355900.42	21104.49	4817.88	3246.41	5781.92	3095.98	4279.2	4515.91	4771.98	17535.05	20207.17	1586.48	54334.09	52981.46	54447.48
MW9616	Tropinone	C8H13NO	216.0198	139.0997	0.5756	1.1103	1	532-24-1	--	C00783	64425.0	1.0	-	-	261773.53	232713.61	474144.0	290532.36	213708.88	356817.37	211046.26	624595.94	447449.14	496174.24	640586.01	381448.62	410491.66	585662.17	620744.7	567962.28	587796.97	847049.74	874362.03	244889.88	427858.54	432468.53	429660.33
MW2961	Tris(hydroxymethyl)aminomethane	C4H11NO3	102.0559	121.0739	0.6435	0.8235	1	77861	HMDB0240288	C07182	--	1.0	-	-	68779.52	167695.02	160027.7	166394.25	346985.42	153342.24	322344.12	152912.01	145860.47	107047.43	85177.9	161619.74	65801.17	61919.71	91613.73	78021.01	94332.86	85173.39	75321.48	140955.3	114228.23	112090.44	112852.84
MW9613	Tris(2-methyl-1-aziridinyl)phosphine oxide;Metepa	C9H18N3OP	448.2711	215.1187	0.6341	4.7214	1	57-39-6	--	C19556	--	1.0	-	-	34832.66	62348.99	40096.48	38364.79	71063.65	42326.95	63639.82	41525.04	45713.96	20876.26	848.02	10831.95	16286.69	3201.42	3881.02	3126.21	791.56	4510.81	2057.92	11263.6	7858.29	6693.37	7615.43
MW2960	Tris(2-chloroethyl) phosphate	C6H12Cl3O4P	264.9341	283.9539	0.5147	0.7297	1	115-96-8	--	C14445	--	1.0	-	-	76595.16	131302.59	168875.0	192510.61	187030.89	188017.61	168396.38	225425.05	235579.51	153532.59	148706.54	98429.73	308175.33	148363.11	162078.35	150371.28	142550.91	188268.47	210662.46	65844.56	150104.21	149548.12	149579.43
MW9611	Triphenyltin chloride	C18H15ClSn	500.8631	385.9884	0.6302	4.1038	1	639-58-7	--	C14413	--	1.0	-	-	25924.5	55375.53	31678.46	76981.27	38587.61	28463.22	37098.97	26825.99	32694.31	6597.69	14700.17	323.7	30884.47	610.67	17280.93	15471.46	1177.47	89911.05	94953.91	1572.94	39558.9	38731.11	37717.38
MW9610	Triphenylpropargylphosphonium	C21H18P	301.114	301.1146	0.644	3.9693	1	2091-46-5	--	--	85162.0	1.0	-	-	3443.83	348.86	44.43	1371.61	404.47	213.55	709.23	417.0	232.57	93.25	1613.62	35329.8	5444.55	1061.33	801.77	2084.7	400.73	2476.79	2099.28	16397.55	8100.01	8348.94	8328.65
MW9609	Triphenylphosphine oxide	C18H15OP	243.0722	278.0861	0.6426	12.6274	1	791-28-6	--	--	64889.0	1.0	-	-	67.67	752.0	524.58	27.49	687.55	530.05	631.59	406.16	26.34	466.18	29.51	980.66	1026.16	23.32	264.35	267.42	28.74	434.16	30.89	630.4	2015.43	2167.16	1844.74
MW9607	Triparanol	C27H32ClNO2	892.4605	437.2121	0.5722	4.0799	1	78-41-1	--	--	6203.0	1.0	-	-	35674.17	8971.43	28203.74	9192.18	4290.03	4171.75	4651.78	4056.54	5509.19	6978.99	54554.23	51419.38	9486.1	55955.38	47449.73	60045.88	81790.97	63269.44	42027.74	85834.9	40245.42	41285.33	40070.42
MW9606	Trimipramine maleate	C20H26N2.C4H4O4	455.1916	410.2206	0.6302	0.8542	1	521-78-8	HMDB01848	C14029	--	1.0	-	-	26530.22	40466.53	36217.44	56080.11	30625.38	26077.47	30739.89	23239.68	38707.56	26747.3	14600.63	14774.79	6445.39	14552.23	14519.37	12759.3	13360.35	1189.08	2753.65	19203.83	21483.1	21488.72	21225.58
MW9605	Trimetrexate	C19H23N5O3	777.3238	369.1801	0.6339	3.7125	1	--	HMDB0015288	C11154	--	1.0	-	-	6065.2	3417.65	4443.96	5971.37	2134.14	1131.52	2524.26	1248.86	7828.0	5951.14	20236.3	17746.31	477.0	13867.64	16698.79	18457.83	16538.56	15502.33	8281.86	26559.55	11806.42	11155.69	11284.72
MW9604	Trimethylsilyl nonanoic acid	C12H26O2Si	248.2049	230.1702	0.5902	0.8351	1	--	HMDB0094668	--	--	1.0	-	-	14082.48	3924.25	28124.07	24974.3	11392.93	21442.21	10989.33	20908.37	20814.04	9508.16	3968.04	7556.29	9244.61	1096.32	2483.39	2389.11	2715.08	2934.94	3582.78	2725.55	10040.32	10716.74	10196.52
MW9603	Trimethylsilyl l-Alanine	C6H15NO2Si	208.0999	161.0872	0.643	2.234	1	--	HMDB0094699	--	--	1.0	-	-	62554.17	59228.1	53895.78	48906.68	49944.6	102017.69	50969.1	69265.53	89246.48	168003.74	80058.54	5326.72	61708.39	45445.02	45831.53	70731.15	89502.18	127796.26	134050.92	1267.45	73182.92	75662.88	72774.65
MW9602	Trimethylsilyl heptadecanoic acid	C20H42O2Si	389.3083	342.2954	0.6442	6.9944	1	--	HMDB0094683	--	--	1.0	-	-	17835.07	3819.02	9159.35	4984.15	2706.28	11188.15	4008.03	8826.24	5800.49	3290.29	5282.78	12078.15	4554.03	4928.73	3815.55	6291.76	6521.14	5990.42	2965.36	26714.45	11357.55	10957.99	11403.16
MW2957	Trimethaphan	C22H25N2OS	350.1452	365.1688	0.7047	0.9213	1	--	HMDB0015248	C07174	--	1.0	-	-	337.25	818.49	744.94	209.46	203.64	183.65	527.04	1031.75	1247.4	852.65	8238.3	3266.59	7642.09	7167.44	7271.63	7647.52	7354.7	1171.71	1673.51	275.51	3276.99	3198.37	3179.21
MW2956	Trimeprazine	C18H22N2S	314.1696	298.1504	0.6467	13.2314	1	84-96-8	HMDB0015376	C07172	2942.0	1.0	-	-	28968.17	31901.27	18720.89	10952.97	22642.23	21601.65	42604.2	24921.32	19116.22	23060.65	44189.23	38582.83	64661.11	64070.44	55356.82	47465.23	35048.47	48716.78	46262.9	50877.25	38671.61	39988.67	39738.01
MW2955	Trifluoroacetic acid	C2HF3O2	112.9856	113.9929	0.6481	0.6476	1	--	HMDB0014118	--	--	1.0	-	-	2037382.84	2302679.95	2356722.18	2045957.33	2813316.95	2702229.54	2516702.8	2265560.01	2682751.85	1938588.27	12660914.26	1765814.77	2761737.55	2413525.83	2517655.58	2412222.26	3008073.67	3226149.97	3120676.51	10630074.65	2314154.55	2319583.22	2312369.63
MW2954	Triflumizole	C15H15ClF3N3O	382.0327	345.0856	0.5385	1.2619	1	68694-11-1	--	C18493	72299.0	1.0	-	-	19437.2	7545.51	9648.02	18492.61	13605.15	16962.52	17057.73	15068.91	53506.43	17571.01	25703.43	33037.56	37505.91	27261.23	29474.73	27885.42	27324.41	42550.8	56741.33	29988.4	25737.43	26674.86	26045.94
MW9599	Triethyl citrate	C12H20O7	299.1103	276.1209	0.6422	13.1769	1	--	HMDB0034263	D06228	--	1.0	-	-	112938.03	76255.72	83055.46	71391.84	58021.06	71464.12	60957.61	66971.06	64524.76	60752.42	25454.59	57547.62	59456.98	63053.23	44831.38	60081.61	65607.34	67636.08	60946.19	68201.43	35369.47	34326.66	30668.94
MW9598	Triethanolamine	C6H15NO3	133.1055	149.1052	0.9217	2.676	2-MetDNA	--	HMDB0032538	C06771	--	1.0	-	-	4050189.17	1124879.14	555596.72	3087385.09	5694817.42	1438250.31	5565970.95	1340056.83	1865443.98	1183232.06	2620188.35	17699050.43	12548535.55	2911360.73	2603332.52	1127275.5	2901762.62	2935524.98	2652247.18	16352784.77	2200647.02	2200401.73	1980053.06
MW9596	Tridihexethyl	C21H36NO	382.2964	318.2797	0.5795	7.6421	1	--	HMDB0014648	C07861	--	1.0	-	-	100799.83	196.16	5298.27	5217.36	1377.06	39075.64	2861.45	37727.56	17162.45	10361.58	9577.66	356.44	12292.28	9999.76	10208.4	11598.54	11267.42	59152.35	45335.28	417.41	19953.08	20601.44	21992.03
MW9594	Tridecanal	C13H26O	221.1859	198.1984	0.7704	1.363	1	--	HMDB0030928	--	--	1.0	-	-	22222671.61	9830136.99	17204165.02	9930266.4	10391720.53	13340347.34	8395330.47	12412813.75	28077082.8	20611509.42	46009561.3	28976808.21	5177719.82	48665044.31	48666851.52	39199712.27	57326998.24	33139982.36	9637726.08	29616740.08	33548422.93	32579308.43	32685639.35
MW2948	Triclofos	C2H4Cl3O4P	246.8904	227.8913	0.6372	10.5268	1	306-52-5	--	C07165	--	1.0	-	-	29988.64	82914.13	57133.09	45942.96	100711.9	63812.15	128519.9	53603.27	80227.26	60531.84	52472.94	67447.36	15859.8	8748.68	10471.91	9916.93	2121.39	5232.1	9929.55	18249.73	42904.47	44546.71	34773.13
MW9591	Trichotomine	C30H20N4O6	596.1545	532.1383	0.6296	0.8143	1	53472-14-3	--	C09247	--	1.0	-	-	37574.16	9298.46	10774.79	12665.08	15417.69	9034.99	15208.2	12119.17	32863.18	9100.26	7844.8	15033.53	4084.07	5705.84	5259.35	8707.68	7749.42	2950.81	5678.21	9873.58	13701.66	14214.07	14045.72
MW2947	Trichocarpin	C20H22O9	425.126	406.1264	0.5967	1.2619	1	10590-85-9	--	C10835	--	1.0	-	-	27213.19	39011.06	11166.68	38491.74	63292.43	22790.04	50468.25	20390.79	67467.93	14102.04	11159.83	31554.43	14782.58	12280.99	13582.86	14686.77	12481.8	7032.22	15800.9	43812.13	19834.0	20569.56	20640.83
MW9590	Trichloroethylene	C2HCl3	193.9304	129.9144	0.6353	1.6269	1	--	HMDB0029593	C06790	--	1.0	-	-	39326.56	109514.23	109556.63	113745.1	284137.93	121444.43	235222.65	140507.71	121338.36	134894.83	69029.77	60623.33	111350.39	71795.81	77888.97	51171.16	45080.08	24290.1	49810.26	137192.81	69218.76	72378.25	69777.55
MW9588	Trichlamide	C13H16Cl3NO3	717.0029	339.0196	0.6272	3.9718	1	70193-21-4	--	C18916	--	1.0	-	-	378.88	2055.81	112.16	1137.03	438.08	299.54	188.99	1141.76	2319.66	2325.49	25255.61	6581.06	4752.42	24473.62	21024.31	25631.29	28221.58	4127.02	3773.5	7975.3	7200.26	7161.3	6869.34
MW2944	Trichilin A	C35H46O13	711.2425	674.2938	0.6434	1.2037	1	77182-69-5	--	C08786	--	1.0	-	-	1337.2	436.35	655.49	1717.47	2457.17	1955.09	2585.87	395.64	546.78	2407.71	26683.63	12888.81	3985.69	14627.02	18276.6	18153.19	12715.26	2976.37	6742.91	6580.42	2834.86	2834.33	3021.81
MW9587	Tricamba	C8H5Cl3O3	525.8945	253.9304	0.6406	4.8395	1	2307-49-5	--	C19057	--	1.0	-	-	82523.89	16390.1	103776.24	25926.63	45412.51	26923.72	41512.45	38023.35	85541.03	66732.97	1089.51	3906.68	2985.85	3641.59	393.77	396.96	518.87	2639.74	780.28	5949.36	10110.58	8721.56	10011.43
MW9586	Tricalcium phosphate;Calcium phosphate tribasic;Synthos	Ca3(PO4)2	637.6259	309.7946	0.5214	4.8278	1	7758-87-4	--	C08136	--	1.0	-	-	41373.15	50392.23	59030.52	127898.18	62025.65	50665.68	63712.85	42616.71	32838.92	40083.15	12837.36	21889.36	81257.5	25380.28	15665.42	18004.37	31101.03	172330.49	179311.04	14238.75	267609.66	266603.04	260684.58
MW2942	Tributyltin oxide;TBTO	C24H54OSn2	579.2056	598.2219	0.5681	4.2093	1	56-35-9	--	C18149	--	1.0	-	-	12678.77	16974.39	3183.79	8704.53	10528.42	9403.02	14032.01	10296.88	6272.43	7024.3	415.91	190.79	258.21	3609.33	1654.52	2584.93	2136.95	2405.9	3376.63	871.39	4084.35	3971.46	3820.91
MW9585	Tributyl phosphate	C12H27O4P	267.1724	266.1647	0.6622	9.869	2-search-DB	126738	--	C14439	--	1.0	-	-	82924.13	98095.19	73056.14	80252.99	79763.87	75140.66	83721.9	68828.45	74663.55	80380.8	83108.92	100889.72	63515.33	85457.32	62538.73	76864.65	78368.84	75807.11	73897.63	81319.43	96450.22	98756.7	97411.42
MW9582	Tribenzylamine n-oxide	C21H21NO	276.1814	303.1623	0.7165	4.1871	1	6852-46-6	--	--	24081.0	1.0	-	-	3202406.48	1954994.21	1107368.37	1336246.19	1251499.83	1504909.43	1256583.26	1334029.38	1095522.32	668338.35	1590059.74	2165352.99	444054.76	1635376.65	1439931.83	1683109.52	1683507.95	1357822.16	1237230.88	3352974.16	1693895.24	1688887.38	1690538.88
MW9581	Triazolam	C17H12Cl2N4	723.0514	342.0439	0.6316	1.2491	1	--	HMDB0015034	D00387	--	1.0	-	-	4797.71	11752.91	7262.25	21668.1	8892.12	15695.66	7397.93	9617.88	15080.79	7119.63	6512.51	9375.46	860.75	9239.41	2554.65	8691.03	10454.93	8092.41	8804.82	8672.96	11647.71	11860.56	11872.12
MW2940	Triazamate	C13H22N4O3S	351.0905	314.1413	0.6005	6.0477	1	112143-82-5	--	C18770	--	1.0	-	-	327213.62	99643.76	493571.49	153354.9	101309.52	140911.67	93259.86	126395.05	405554.07	463640.09	175291.82	97678.26	169835.29	156874.89	152375.76	169334.46	158992.45	205685.97	216726.65	138292.04	196878.94	197806.54	199481.46
MW9580	Triasulfuron	C14H16ClN5O5S	424.0462	401.0561	0.5911	10.6471	1	82097505	--	C10961	--	1.0	-	-	114103.16	157802.22	162406.54	116995.65	167837.92	165314.18	165893.87	173082.62	5416.79	146762.43	60644.0	103214.42	40072.4	39267.56	52641.6	58753.49	46482.61	70717.15	53235.41	103082.72	137075.54	136789.31	132672.5
MW9579	Triamifos	C12H19N6OP	336.1692	294.1358	0.6155	4.062	1	1031476	--	C18927	--	1.0	-	-	29625.61	2271.73	2586.69	8188.08	1565.07	10499.87	10283.17	10756.19	1966.69	12633.2	102308.38	185954.57	1061.81	85029.13	82596.68	82844.74	72756.66	51796.99	77263.82	94099.4	97143.48	96672.36	96918.2
MW9578	Triallate	C10H16Cl3NOS	607.009	303.0018	0.5547	1.9446	1	2303-17-5	--	C18813	--	1.0	-	-	36938.93	30826.87	9473.72	33734.14	19743.04	14361.48	22054.24	14330.83	172539.52	19487.32	18939.48	107136.94	11564.18	25685.16	18190.05	23118.74	20193.0	107700.63	31288.93	29934.39	24207.61	23768.24	23370.71
MW9575	Tri-N-acetylchitotriose	C24H41N3O16	650.2386	627.2487	0.6208	4.9005	1	38864-21-0	HMDB0006698	--	58520.0	1.0	-	-	116922.66	53795.02	123994.38	78389.45	56689.5	94768.47	50422.7	46276.55	49849.08	87091.64	3739.94	4450.82	1500.18	1835.14	2552.24	617.89	2090.15	10591.88	3407.03	2844.98	23573.51	22840.03	22560.88
MW2938	Trenbolone	C18H22O2	539.3178	270.162	0.586	9.3054	1	10161-33-8	--	C14261	--	1.0	-	-	53541.35	8441.62	13173.42	29291.4	4351.86	28480.21	6136.59	20376.8	948.15	20647.37	17970.96	14226.32	28228.71	25284.76	20177.45	24161.8	32952.6	5224.16	4341.4	14654.21	28791.13	29085.83	29416.78
MW9574	Tremetone	C13H14O2	185.0975	202.0994	0.5486	0.7938	1	4976-25-4	--	C08992	--	1.0	-	-	86701.87	39239.48	83882.68	63426.33	31661.79	69331.78	33832.88	61659.31	82289.87	52940.81	80043.97	63484.24	62634.67	86062.84	70287.21	78589.07	79355.89	94178.11	90706.63	55363.37	75978.49	76972.79	76976.34
MW9573	Trazodone hydrochloride (Desyrel)	C19H23Cl2N5O	815.2631	407.128	0.6463	4.9652	1	--	--	D00820	--	1.0	-	-	102936.04	108589.07	214239.25	39741.03	87847.21	68192.29	8591.12	149617.92	108393.32	122735.78	13091.25	15080.3	10495.78	14583.42	2546.3	2917.39	7051.29	15905.03	4838.02	9246.55	5612.37	5340.68	5588.88
MW2936	Traumatin	C12H20O3	195.1136	212.1412	0.6515	4.436	1	--	HMDB0037326	C16309	--	1.0	-	-	27399.32	16032.88	22535.38	13297.65	14375.53	17454.0	15127.48	15045.36	11781.62	13882.73	3473.0	11913.92	406.29	1813.53	5069.39	2976.79	5232.34	11668.07	7374.71	5319.09	11350.99	11296.73	11136.74
MW2923	Trandolaprilat	C22H30N2O5	803.4235	402.2155	0.6447	4.6685	1	--	HMDB0060583	C21515	--	1.0	-	-	322.02	2057.71	2396.53	527.83	284.98	1876.38	1109.25	2075.43	272.19	1982.6	11024.65	8217.34	8074.62	10752.46	9972.37	10762.32	9925.41	1510.47	1228.4	14139.19	3111.16	3282.62	3166.07
MW2922	Tralomethrin	C22H19Br4NO3	679.8106	660.8098	0.5641	13.3012	1	66841-25-6	--	C18413	--	1.0	-	-	16502.94	15621.24	16809.3	17332.39	19132.65	17605.05	16822.68	19800.56	16242.12	20015.7	17332.11	18805.09	13297.73	15345.91	16590.75	16406.27	13791.53	15193.68	11584.82	12069.09	16780.51	16047.37	15623.89
MW2921	Trabectedin;Ecteinascidin 743	C39H43N3O11S	780.2643	761.2618	0.5146	0.8286	1	114899-77-3	HMDB15609	C16875	--	1.0	-	-	19093.86	1697.93	17389.3	9806.9	2694.89	10463.5	5607.17	5566.84	21084.13	8740.36	20828.59	13894.99	12862.52	21555.49	21466.15	20450.7	15745.9	13457.68	13732.06	13894.41	14796.9	14523.82	14741.78
MW9547	Toyocamycin	C12H13N5O4	621.156	291.0968	0.6153	0.7511	1	606-58-6	--	--	96312.0	1.0	-	-	832583.88	619981.13	564150.85	629139.6	576099.47	379424.85	561314.17	375098.72	618906.04	502801.59	243337.76	496440.21	99166.21	258728.4	248312.4	251437.1	246790.34	248991.36	254307.6	399698.97	448799.83	444567.57	443011.92
MW2919	Tosyllysine Chloromethyl Ketone	C14H21ClN2O3S	353.0722	332.0961	0.5481	0.9012	1	4238-41-9	--	C00896	45451.0	1.0	-	-	28667.36	26384.08	27509.7	20296.92	38429.09	24300.97	36438.73	25457.0	70052.46	24488.76	4763.91	3125.74	4343.8	1303.55	2315.17	2105.0	2875.53	4763.33	3606.37	1314.88	11563.67	11679.21	11486.56
MW9546	Torcetrapib	C26H25F9N2O4	639.1309	600.1671	0.6165	0.7459	1	262352170	--	D06195	--	1.0	-	-	32114.5	73805.49	31784.23	72808.73	71499.0	41586.98	71064.08	40684.28	34621.92	40680.36	7938.67	21055.56	6762.45	12624.87	11518.78	8274.03	8462.79	6905.91	4441.4	25690.49	27338.3	27360.19	27383.23
MW9545	Torasemide	C16H20N4O3S	415.0786	348.1256	0.6242	3.2067	1	--	HMDB0014359	D00382	--	1.0	-	-	14479.51	2612.14	21426.5	35604.55	24165.9	40941.34	23354.72	43052.12	18704.09	27981.01	2732.38	1761.42	1428.34	3043.28	250.78	2246.43	267.92	3984.29	1551.06	586.07	2053.58	3310.03	2968.31
MW9544	Torachrysone	C14H14O4	264.1239	246.0892	0.5853	4.14	1	--	HMDB0038473	C17672	--	1.0	-	-	1672.68	1517.73	159.21	746.72	1247.82	301.2	1203.71	369.2	1829.4	304.31	20998.49	1193.54	29904.21	19254.92	18508.47	20834.07	16396.07	5634.95	4010.52	2028.63	4802.72	4639.48	4666.02
MW9543	Toonacilin	C31H38O9	631.1709	554.2516	0.6377	13.1804	1	66610-71-7	--	C08785	--	1.0	-	-	126914.9	155723.97	133432.11	54082.59	139.19	56121.52	138.84	83600.89	46156.17	138.1	64793.53	58805.92	69343.62	67990.79	64671.51	61057.54	64555.78	66748.93	32658.78	62804.09	56912.45	56541.97	55956.12
MW9542	Toluene-cis-dihydrodiol;(1S,2R)-3-Methylcyclohexa-3,5-diene-1,2-diol	C7H10O2	144.1021	126.0681	0.6407	3.0421	1	--	--	C04592	--	1.0	-	-	209175.49	153177.97	117063.43	134830.34	101442.68	75963.06	92762.21	71391.62	159107.95	72426.11	569063.86	186955.5	92602.66	570963.42	517788.85	593841.32	606766.52	569851.22	517366.62	157705.39	289402.24	290544.39	294452.4
MW9541	Toluene	C7H8	93.0699	92.0626	0.6496	2.149	1	--	HMDB0034168	C01455	--	1.0	-	-	8121.48	3227.03	2807.04	3649.77	3563.19	2583.1	1911.55	2217.93	3066.43	2029.22	3231.82	12573.8	7581.94	3382.34	3196.29	2565.77	3218.23	4729.6	3963.52	9281.78	5528.24	6002.97	5727.08
MW2918	Tolmetin sodium	C15H14NO3.Na	316.0365	279.0871	0.5912	6.5296	1	--	--	C02328	--	1.0	-	-	107361.53	62616.25	207314.21	122754.53	61944.83	83907.16	62308.35	85563.73	120060.88	171867.67	83438.54	85205.72	80687.99	60600.8	70657.9	87127.47	73845.02	79735.42	85654.42	81207.96	85409.88	86833.76	86609.35
MW9539	Tolbutamide	C12H18N2O3S	293.0932	270.1038	0.6456	4.161	1	--	HMDB0015256	C07148	--	1.0	-	-	23143.5	36214.64	45653.33	32624.76	55521.29	60738.74	62121.08	47702.55	37050.31	77790.39	25362.69	20431.42	6679.68	25710.94	24894.44	23096.51	23258.44	25848.33	23669.59	23182.52	10171.32	10346.26	10050.25
MW9538	Tolazamide	C14H21N3O3S	661.2238	311.1304	0.6462	12.5429	1	--	HMDB0014977	D00379	--	1.0	-	-	234.33	119.27	2091.62	2577.54	1031.01	1829.4	48.09	2243.0	74.97	2743.07	8706.67	8936.15	9395.89	8337.51	9200.97	9374.95	9166.57	5997.89	37.91	7891.06	11602.15	12733.95	10076.22
MW2916	Tokuthion	C11H15Cl2O2PS2	364.9388	343.9628	0.5509	0.1945	1	34643464	--	C18405	--	1.0	-	-	197667.98	178247.16	79383.42	68076.43	147221.64	168966.36	171657.66	164026.39	72713.75	179781.15	190539.76	173057.19	154375.25	183392.87	176207.76	158244.89	95662.65	247623.05	166376.48	146446.96	150723.08	139710.88	127782.7
MW9537	Tofenacin	C17H21NO	322.1153	255.1623	0.6257	4.187	1	15301936	HMDB0060632	--	--	1.0	-	-	18142.9	15396.18	126529.99	7426.28	64714.15	122043.37	88196.23	104492.68	169416.18	129519.47	39074.71	29941.24	45835.48	36730.05	36163.22	37307.74	32414.52	3895.66	23573.46	36869.77	5618.84	5869.98	5461.49
MW9535	Tocophersolan	C35H58O6	574.4236	574.4233	0.6098	4.1164	1	--	HMDB0034354	D06174	--	1.0	-	-	1259.47	383.03	1004.65	1431.56	398.12	380.25	247.78	1129.62	417.05	305.06	8179.2	25921.86	125.04	8593.99	3748.28	9350.55	6195.11	13512.41	10871.04	14356.99	11190.91	11119.83	11172.8
MW2914	Tiropramide	C28H41N3O3	466.3073	467.3148	0.6386	13.2221	1	--	HMDB0042042	D07087	--	1.0	-	-	19215.6	16955.76	6186.67	26829.82	23323.0	18110.82	4760.6	13704.71	65548.93	27402.61	17766.78	32704.88	11124.85	43784.18	30466.18	32676.08	81724.16	79343.12	44501.72	40238.62	57454.32	41889.26	53630.27
MW9532	Tioclomarol	C22H16Cl2O4S	429.0109	446.0146	0.6164	4.146	1	--	--	D07137	--	1.0	-	-	1065.22	7091.5	3454.12	3914.03	11765.54	3251.38	10207.67	3279.0	6249.09	701.25	302.15	9483.53	2513.02	251.27	275.56	373.54	1292.09	4257.89	1650.97	101.12	14303.07	14447.55	14308.61
MW9531	Tingenone	C28H36O3	465.2384	420.2664	0.6021	3.9741	1	50802-21-6	--	C08638	--	1.0	-	-	265.4	25061.4	2411.56	4854.61	19517.31	5270.01	19992.21	4986.95	7991.62	151.66	617.54	16963.91	58333.35	786.06	135.24	481.09	91.95	799.41	1252.63	393.54	27795.37	28046.03	27862.72
MW9530	Timolol	C13H24N4O3S	431.0312	316.1569	0.5965	3.932	1	26839-75-8	HMDB0014517	C07141	2856.0	1.0	-	-	1260.97	2905.32	39.32	21.06	154.95	68.34	65.5	116.39	23.86	521.68	177.51	372.33	64.95	609.31	1334.9	1014.74	951.05	6742.09	4356.59	88.19	3809.1	3744.32	3809.92
MW9529	Tiludronate	C7H9ClO6P2S	636.8638	317.9284	0.6393	5.4488	1	--	HMDB0015265	C08141	--	1.0	-	-	56.91	30.72	143.48	83.1	170.94	61.64	57.61	111.62	165.1	22.23	27.94	288.5	54.43	101.49	54.81	114.79	120.69	224.88	242.98	40.66	1286.83	1281.98	1223.81
MW9528	Tilorone	C25H34N2O3	859.4743	410.2569	0.5522	4.834	1	27591-69-1	--	--	34544.0	1.0	-	-	50563.07	33386.73	84607.09	40341.11	35519.55	49623.86	39034.37	36905.78	67262.63	57064.08	2749.03	4115.48	12791.59	1796.92	1985.28	2120.12	3151.98	4175.47	6132.23	1591.33	16067.1	16083.43	16345.02
MW2912	Tilmicosin	C46H80N2O13	867.5579	868.566	0.621	4.8266	1	--	--	D02492	--	1.0	-	-	555.54	228.57	211.8	208.99	2330.98	449.07	2370.29	2663.63	2520.14	2789.87	7095.15	6792.97	16916.01	7249.07	7580.83	7512.92	7286.54	900.5	4403.6	6467.47	5636.91	6054.34	5744.21
MW9527	Tiliroside	C30H26O13	595.1444	594.1373	0.6367	4.0779	1	20316625	--	C17140	--	1.0	-	-	131771.98	88709.06	152471.87	80551.29	55331.91	49839.18	40003.15	43326.87	64638.53	63257.03	148607.09	155591.24	34733.27	151379.04	130090.43	147274.55	163776.02	134685.33	117778.34	207022.74	106507.11	107690.01	106558.01
MW2911	Tigecycline	C29H39N5O8	604.2803	585.2799	0.5722	0.8216	1	--	HMDB0014700	C12012	--	1.0	-	-	2201.53	336.03	1572.75	1221.99	843.18	908.08	294.24	327.16	280.62	1017.74	9070.02	7172.84	371.75	8688.11	8609.79	8724.56	5974.69	1507.53	924.6	3066.14	2201.8	2158.37	2154.61
MW2910	Tifluadom	C22H20FN3OS	412.1297	393.1311	0.6263	4.3611	1	83386-35-0	--	C11797	--	1.0	-	-	160880.25	113161.88	173713.43	138633.7	107766.82	143574.79	104586.78	131679.54	120659.89	131083.34	98828.45	142591.15	78935.3	106475.49	98070.65	102125.77	113321.26	158454.34	143239.82	151876.38	140924.46	140905.16	139372.36
MW9526	Ticarcillin	C15H16N2O6S2	423.0085	384.045	0.6262	1.1103	1	--	HMDB0015545	C07139	--	1.0	-	-	52960.8	305903.15	178047.11	79767.06	178760.69	198585.83	175813.24	221714.03	127513.44	328384.24	312202.84	218425.57	293625.45	300106.84	330230.89	247745.62	259256.83	274976.96	198532.36	152512.58	210131.22	211298.16	211818.95
MW2908	Tiapamil	C26H37NO8S2	554.1887	555.1961	0.8932	4.8114	1	57010-31-8	--	C13765	--	1.0	-	-	50843.89	21045.09	46908.82	32978.46	33070.1	132874.14	32207.24	111100.73	83148.67	75068.87	42832.93	54541.7	7521.68	44513.68	41615.4	47765.92	50106.67	49053.94	46873.25	26774.3	64629.29	65547.02	65772.52
MW2907	Tiamulin	C28H47NO4S	530.2713	493.3226	0.6398	13.253	1	--	--	C12065	--	1.0	-	-	5190.31	1911.15	1274.4	1488.62	3325.56	803.46	2843.21	679.57	4718.3	2120.11	15678.1	8651.16	3666.8	13689.74	14907.09	23815.69	29353.41	9333.83	9006.47	15839.04	8715.98	8399.39	8685.11
MW9525	Thymopentin	C30H49N9O9	662.3589	679.3653	0.5137	4.8506	1	--	--	D06117	--	1.0	-	-	50791.55	46890.11	116965.16	50537.35	82611.58	64770.17	77716.36	73149.93	87504.96	92193.44	4113.76	8129.29	5690.82	1905.75	1967.0	2234.89	750.65	10003.79	18400.72	6581.41	21715.63	21804.72	21389.87
MW9524	Thymidine 5'-triphosphate	C10H17N2O14P3	548.943	481.9893	0.6249	6.4542	1	--	HMDB0001342	C00459	--	1.0	-	-	9.77	7.42	69.62	39.08	7.34	119.11	8.15	115.58	84.08	28.81	9.89	16.24	57.65	29.53	26.13	11.76	33.11	138.73	155.28	11.8	1119.89	1077.81	1069.44
MW9492	Thr-Trp-OH	C21H21N3O7	504.0566	427.138	0.6219	1.1075	1	--	--	--	65032.0	1.0	-	-	48944.66	234974.92	175914.46	599931.2	681539.08	209529.4	320894.94	258130.51	190713.04	256410.44	149257.59	122184.57	155542.79	157084.18	169333.79	83287.23	122923.7	69666.37	123160.11	157459.12	132393.54	147640.58	147359.16
MW2888	Thr-Thr-OH	C14H18N2O8	683.2068	342.1063	0.5852	7.0785	1	--	--	--	65101.0	1.0	-	-	8982.73	14966.63	19601.72	10454.46	8253.21	12653.56	11955.36	7795.36	13635.24	12642.16	18427.22	15427.56	13897.09	15961.55	12261.89	15199.2	13603.24	11988.3	17788.13	15020.22	14121.28	13822.05	13786.79
MW2886	Thr-Lys-OH	C16H23N3O7	737.2977	369.1536	0.5592	1.5511	1	--	--	--	65268.0	1.0	-	-	10686.64	10768.94	3156.24	8405.15	17334.46	4865.44	15847.72	3226.44	9349.52	5004.55	5386.08	10929.82	3727.06	4707.93	8548.86	3505.39	3199.38	277.79	771.74	21699.3	6112.83	5959.94	6101.06
MW9491	Thr-Leu-OH	C16H22N2O7	372.1767	354.1427	0.6424	4.4444	1	--	--	--	65228.0	1.0	-	-	2062.97	1328.61	699.65	554.86	148.13	161.5	779.26	224.32	371.57	103.79	13571.64	9435.09	7948.05	13271.55	12855.32	13119.08	15571.23	2176.88	1332.21	14157.51	5174.52	3163.83	3240.02
MW9521	Thr Tyr Ser	C16H23N3O7	414.125	369.1536	0.6444	1.4448	1	81161-89-9	--	--	16361.0	1.0	-	-	11266.68	69753.65	35309.47	60380.85	75968.76	34671.7	84783.95	33885.28	41699.65	36541.83	3526.96	20032.4	23625.06	1376.65	4133.13	3757.31	2686.35	706.61	2896.02	19982.14	13347.52	13899.4	14878.17
MW2905	Thr Tyr Lys	C19H30N4O6	429.2156	410.2165	0.6376	8.2743	1	--	--	--	19776.0	1.0	-	-	120716.9	148766.06	62418.74	205854.41	111433.67	220149.57	111085.31	211516.2	83785.61	154642.91	181939.76	199666.53	396618.86	186860.73	230443.45	194926.98	221856.47	70051.61	54413.64	195728.44	166710.57	170031.9	174455.63
MW2904	Thr Tyr Ile Arg	C25H41N7O7	572.282	551.3067	0.8672	13.003	1	--	--	--	239233.0	1.0	-	-	349024.11	104465.68	67473.88	163449.58	434649.89	634004.11	136361.8	259700.88	1182925.75	331331.0	110534.57	175433.67	315504.25	96923.29	161050.44	222900.24	257186.84	29134.65	8102.3	180179.11	414057.26	434722.94	337002.79
MW2903	Thr Tyr Glu Lys Tyr	C33H46N6O11	683.304	702.3225	0.6254	10.6756	1	--	--	--	264556.0	1.0	-	-	152381.44	178290.43	248940.85	339175.44	156074.31	396833.22	142138.98	221726.76	5770.4	179244.33	68944.47	102331.63	74538.76	86713.3	61138.87	95452.38	101227.47	55247.62	55716.84	97075.77	173731.92	174618.02	174698.08
MW2902	Thr Trp Glu	C20H26N4O7	450.1997	434.1802	0.6345	4.2858	1	--	--	--	15826.0	1.0	-	-	557.99	7982.53	6974.76	4453.47	322.94	141.69	368.22	150.34	167.61	5434.67	32414.01	11904.65	9153.28	41152.91	32572.07	36642.21	42223.13	11816.3	14367.85	30389.9	16494.19	16377.79	16563.2
MW9518	Thr Trp Asp	C19H24N4O7	421.1732	420.1645	0.6683	4.5592	1	--	--	--	18424.0	1.0	-	-	127.91	2866.97	137.02	91.51	100.8	89.09	1460.57	1906.97	291.62	3469.13	32685.07	1312.98	5857.99	44201.87	38243.64	37178.22	43783.46	9744.06	5910.3	2279.13	13451.06	13314.8	13309.38
MW9517	Thr Thr Lys	C14H28N4O6	390.2333	348.2009	0.5496	6.6203	1	--	--	--	23026.0	1.0	-	-	112745.36	2014.83	17122.14	22790.89	34917.01	114540.51	42000.07	98503.06	108819.71	13636.51	4736.26	755.11	670.92	3089.7	3860.73	2920.45	3669.59	5776.98	2292.6	8846.94	22310.74	22241.36	22242.1
MW9516	Thr Thr Asp Glu Tyr	C26H37N5O13	674.2521	627.2388	0.6242	4.9171	1	--	--	--	264347.0	1.0	-	-	138621.26	12427.91	41610.29	49584.97	77114.09	91852.31	92305.07	83596.72	135323.26	60924.7	3458.14	14308.02	3533.37	917.25	2261.25	1626.01	2360.65	9857.41	3675.85	1467.88	10270.16	10448.92	8782.42
MW9515	Thr Ser Phe	C16H23N3O6	430.078	353.1587	0.6354	0.9081	1	--	--	--	16360.0	1.0	-	-	428.24	1569.39	3638.29	3728.48	3184.55	3939.83	2518.74	4761.58	6173.49	6904.81	13879.1	15186.45	2926.23	14051.56	14403.69	11941.23	9014.04	2933.32	6798.2	22131.61	8569.54	8406.8	8393.06
MW9514	Thr Ser Arg Ile Ile	C25H48N8O8	571.3586	588.3595	0.526	9.8381	1	--	--	--	264923.0	1.0	-	-	82452.12	86282.36	66433.36	18519.95	57279.62	43301.76	66918.92	29548.62	9214.02	38392.87	84934.6	46279.79	13793.15	100894.95	82201.49	90024.35	109826.71	91872.38	102902.89	29397.98	102179.65	102617.44	114407.78
MW9513	Thr Ser	C7H14N2O5	171.0761	206.0903	0.6316	0.8613	1	--	--	--	23808.0	1.0	-	-	1202.39	10801.25	22231.44	67792.68	44378.08	87594.28	29968.96	84067.07	5616.61	69518.85	12789.45	65212.43	20429.73	12436.26	9665.28	6258.5	10608.93	25082.52	28660.45	66886.29	38312.53	38263.29	38480.83
MW2899	Thr Pro Ser Cys Asn	C19H32N6O9S	1039.3843	520.1951	0.61	4.1504	1	--	--	--	264969.0	1.0	-	-	19670.32	362.88	16735.19	186.18	4777.85	110.0	297.77	282.22	15286.97	12853.33	65428.49	216.0	2094.22	60193.48	61719.7	64367.76	67065.3	26860.64	25241.39	223.12	26220.9	26208.94	25900.96
MW2898	Thr Pro Met	C14H25N3O5S1	366.1503	347.1515	0.6413	0.8509	1	--	--	--	15726.0	1.0	-	-	42241.79	72123.47	20918.29	4069.38	42732.75	50356.32	38194.64	50458.36	8085.75	14400.27	10628.83	2839.77	21021.32	8948.14	8391.93	1812.82	7185.96	1597.84	815.1	9686.31	16089.9	15827.93	16105.56
MW2897	Thr Phe Met	C18H27N3O5S1	396.1599	397.1671	0.6464	4.7182	1	--	--	--	16225.0	1.0	-	-	4035.52	5713.03	1734.47	12628.45	12118.26	22832.57	381.07	24341.6	20060.64	25047.43	72314.08	34224.7	49140.18	67494.05	66640.26	88693.68	76200.41	57456.16	49898.61	46181.21	30194.69	30788.81	30237.18
MW9511	Thr Lys Pro Arg	C21H40N8O6	1023.6039	500.3071	0.6355	4.4932	1	--	--	--	234933.0	1.0	-	-	38174.52	36030.42	28182.26	25406.1	32025.89	35884.32	27531.42	24401.97	26153.79	27087.22	8089.72	5226.39	3664.27	4103.5	7072.91	5185.03	7596.61	13760.37	14152.52	6338.49	17379.64	17659.22	17067.96
MW9510	Thr Lys Gln	C15H29N5O6	340.1964	375.2118	0.5388	2.2264	1	--	--	--	17096.0	1.0	-	-	254.65	573.38	266.56	546.89	195.5	373.1	457.66	827.94	316.9	162.92	398.38	1220.08	1707.77	477.23	221.69	177.02	210.78	623.34	130.78	391.42	2273.46	2315.83	2420.52
MW2896	Thr Lys Ala Glu	C18H33N5O8	428.2134	447.2329	0.5382	8.2623	1	--	--	--	234682.0	1.0	-	-	550836.71	837113.47	524863.12	1027715.42	567531.55	1155249.55	538324.35	1096614.21	696136.04	579445.47	950189.54	1030513.45	2112760.54	1088882.11	1180419.88	1007148.49	1162024.37	300720.82	263834.28	974017.29	833968.63	863294.38	862679.37
MW9508	Thr Leu Lys Lys	C22H44N6O6	453.3181	488.3322	0.6351	8.5643	1	--	--	--	235247.0	1.0	-	-	14771.88	597.65	4219.11	2097.3	201.66	2952.84	204.5	1475.48	3196.93	2572.14	9152.08	7104.76	3034.33	12973.21	7373.54	8174.38	12130.36	1258.62	1257.16	9799.09	6025.69	6256.78	6271.28
MW9507	Thr Leu Asp Glu	C19H32N4O10	441.1974	476.2118	0.86	0.7807	1	--	--	--	235122.0	1.0	-	-	1107433.62	636846.12	741353.31	682331.68	475738.62	450420.88	468910.89	456401.88	837560.09	380168.05	363912.7	481513.43	252245.06	351292.83	352353.53	345266.68	346025.58	296077.27	273083.24	485036.53	563903.88	558025.85	557520.91
MW9506	Thr Leu Arg	C16H32N6O5	389.2511	388.2434	0.6192	3.6961	2-search-DB	--	--	--	22344.0	1.0	-	-	1670.29	7335.57	12460.47	7866.06	10240.87	16934.83	10182.05	12563.36	7347.62	8596.02	139297.48	2131.4	347362.92	124122.42	138560.24	156211.34	118713.79	96310.59	92179.79	179.65	46096.35	46323.28	46030.11
MW9505	Thr Ile Glu Arg	C21H39N7O8	518.2514	517.286	0.6768	4.1159	2-search-DB	--	--	--	234353.0	1.0	-	-	163.71	18645.69	391.91	258.6	20734.63	581.97	19923.58	903.46	1787.81	700.09	19559.17	33597.44	61020.31	16758.64	16902.04	3956.98	5355.92	901.51	10473.67	4279.57	33779.35	33032.08	34002.17
MW2894	Thr Ile Asp Phe Glu	C28H41N5O11	622.2738	623.2803	0.6078	4.2195	1	--	--	--	264773.0	1.0	-	-	19291.91	30827.6	11586.03	13064.76	15433.8	10644.37	19601.59	9639.57	10566.86	4919.21	9001.61	347.45	3543.95	16325.97	8811.18	10561.99	10964.5	8280.54	16748.26	3541.14	9132.19	9124.49	8847.82
MW9504	Thr His Lys	C16H28N6O5	402.2477	384.2121	0.5295	1.4566	1	--	--	--	19678.0	1.0	-	-	34851.62	168959.14	38337.55	44825.64	101285.46	49268.49	95449.54	43936.38	43698.91	20246.76	1359.28	7712.81	49624.57	1088.46	1281.35	11168.97	10413.93	17768.59	337.43	28434.37	49865.7	49767.92	48963.87
MW9503	Thr His Arg	C16H28N8O5	412.2182	412.2183	0.613	8.3236	1	--	--	--	19621.0	1.0	-	-	90633.77	240269.09	92220.79	63644.67	148784.89	214000.84	192012.15	251602.21	75510.08	236789.07	81639.9	133035.66	218313.87	81876.86	125859.93	108741.78	41812.8	33904.57	74227.83	52574.52	15929.74	16687.01	16442.4
MW2893	Thr Glu Leu Lys	C21H39N5O8	470.2613	489.2799	0.6069	4.3273	1	--	--	--	232867.0	1.0	-	-	272.63	202.96	8606.72	181.64	434.43	441.76	282.06	5937.06	496.75	9087.99	23526.53	15190.23	28641.28	26739.09	21969.22	19947.94	23038.21	63329.34	63253.16	32072.02	19193.81	18882.72	19044.02
MW9502	Thr Glu Arg	C15H28N6O7	405.2093	404.2019	0.6495	3.8773	1	--	--	--	19110.0	1.0	-	-	2952.03	2109.2	511.4	1572.11	916.27	794.76	677.06	898.14	1237.9	413.56	724.55	12251.36	67864.87	515.55	1128.22	454.15	3066.1	1598.61	2429.04	1706.91	7927.12	7601.61	7524.64
MW9501	Thr Glu Ala	C12H21N3O7	337.1722	319.138	0.6218	4.0554	1	--	--	--	16330.0	1.0	-	-	240.07	1309.48	170.45	524.67	476.01	259.01	271.16	151.89	401.55	287.71	328.81	866.14	2363.27	383.98	585.16	557.11	364.15	451.25	711.13	407.95	4188.46	4199.5	4301.23
MW9500	Thr Gln Arg	C15H29N7O6	518.0929	403.2179	0.649	4.828	1	--	--	--	16089.0	1.0	-	-	1970.99	3794.49	6457.0	10246.66	5226.02	3537.53	3624.68	3646.4	2307.44	3352.31	2294.09	920.59	4661.25	506.4	112.4	1710.66	969.7	4286.95	7642.07	3300.08	13905.34	13613.24	13928.21
MW9499	Thr Asp Lys	C14H26N4O7	404.213	362.1802	0.5801	3.9941	1	--	--	--	21197.0	1.0	-	-	1668.49	728.7	417.33	227.84	1330.71	496.81	1586.65	117.69	1768.98	170.57	274.43	2965.58	309.14	225.78	314.55	363.54	1156.38	3322.71	2999.97	119.06	7569.08	7582.68	7719.31
MW2890	Thr Asn Lys	C14H27N5O6	342.1778	361.1961	0.6145	3.9708	1	--	--	--	19410.0	1.0	-	-	50962.76	2555.98	3425.45	4742.61	9078.25	4660.97	8084.78	2831.01	11447.03	2960.96	2956.36	11026.69	806.91	3824.32	3057.0	3662.0	4085.03	2268.84	2232.64	12349.66	7980.73	7892.31	8108.49
MW9498	Thr Asn Arg	C14H27N7O6	796.4421	389.2023	0.5163	4.2831	1	--	--	--	17691.0	1.0	-	-	13472.33	61964.78	24011.1	28123.79	11812.37	9734.52	10264.15	11683.85	52336.63	15684.53	156247.41	82241.03	185613.55	132987.42	139040.42	149548.07	146960.2	179265.58	168229.7	108383.66	96016.59	96394.21	96127.83
MW9496	Thr Arg Glu Glu Lys	C26H47N9O11	700.3033	661.3395	0.6216	0.7807	1	--	--	--	264414.0	1.0	-	-	23758.4	27049.74	12764.54	18997.78	17620.39	4912.92	21054.46	5315.81	18669.29	5164.71	3103.06	15236.26	3054.54	4161.68	4631.96	2473.64	4247.33	1642.45	2739.7	16277.65	9105.31	9072.17	9357.67
MW9495	Thr Arg Cys	C13H26N6O5S1	493.0446	378.1685	0.5828	1.5531	1	--	--	--	21101.0	1.0	-	-	32172.82	22980.96	31309.77	24087.51	19382.91	31881.33	13151.61	35004.48	22984.57	32439.84	17533.25	7145.38	12925.79	13562.76	10161.66	16913.01	16839.88	17066.8	18885.12	3310.38	28659.88	28636.66	28119.96
MW2889	Thr Arg	C10H21N5O4	296.1346	275.1594	0.8538	0.9533	1	108320-96-3	--	--	23730.0	1.0	-	-	408893.31	364550.53	467557.43	596246.31	363979.86	364661.3	355074.45	407174.55	392284.81	381954.47	1051432.84	614407.52	863684.19	1002961.96	1028010.97	1033146.54	1004212.32	888146.89	883016.41	558248.13	649633.98	669451.35	654494.08
MW2885	Thiotropocin	C8H4O3S2	210.953	211.9602	0.6458	5.5079	1	89550-93-6	--	C12105	--	1.0	-	-	635146.26	243250.2	321173.51	605860.53	33085.0	234138.69	13698.13	415334.67	265517.36	194084.27	7544.37	28129.1	534665.28	24923.15	11480.23	7252.74	14923.49	272814.94	75203.77	19376.83	111790.38	108797.67	105021.08
MW9488	Thioridazine 5-sulfoxide	C21H26N2OS2	351.1348	386.1487	0.6437	4.7094	1	7776-05-8	--	--	2836.0	1.0	-	-	5090.53	14174.82	15819.09	11654.73	19544.22	40647.84	19706.36	31187.02	3659.95	19347.43	15644.87	731.89	1487.61	5815.02	15315.2	9084.09	2250.14	3238.85	8266.86	4081.41	6295.52	5641.25	6484.88
MW2881	Thiophene-2-thiol	C4H4S2	152.9251	115.9754	0.567	13.4377	1	7774745	HMDB0029720	--	--	1.0	-	-	16334.99	15690.94	14032.83	16654.25	18273.01	16476.83	19403.04	21381.75	14037.06	17849.76	7771.89	13042.55	23265.67	12777.74	11675.62	13837.01	14259.75	9209.39	11041.65	15098.53	11735.25	12299.14	11878.23
MW9487	Thiophene-2-carbonyl-CoA	C26H38N7O17P3S2	895.131	877.0978	0.6268	4.9629	1	--	--	C07347	--	1.0	-	-	2764.12	3048.24	3789.45	5111.93	2845.55	3118.46	1512.09	857.43	857.67	1464.39	18142.54	8433.34	7883.55	23288.52	22946.5	24846.48	26634.24	24633.28	24043.03	6627.4	13852.86	13407.02	13903.94
MW9486	Thioperamide	C15H24N4S	275.1686	292.1722	0.6284	2.739	1	148440-81-7	--	C17933	45306.0	1.0	-	-	399980.37	126060.71	132001.56	226761.33	143303.87	134202.88	130610.83	100299.31	76276.63	68414.06	233234.1	231277.46	123501.78	314810.87	221078.87	248298.7	351628.48	226636.48	246229.69	222485.26	213355.65	215050.78	208122.57
MW2880	Thiolanilide	C12H11NOS	216.0488	217.0561	0.6987	1.6119	1	--	--	--	96349.0	1.0	-	-	11188.99	64989.61	341545.78	133066.55	45296.08	100241.91	37263.67	106046.65	87244.56	47837.01	60903.48	202339.49	90573.42	38221.81	93331.31	52352.1	49181.68	26465.77	50936.21	97560.04	78765.3	81579.05	79126.13
MW2879	Thiolactomycin	C11H14O2S	152.9957	210.0715	0.7197	0.8441	1	82079-32-1	--	C11165	--	1.0	-	-	275152.25	259195.77	242274.86	186473.55	151436.98	284838.74	272255.58	165663.24	228383.67	159465.12	288594.6	431932.55	493917.87	312135.91	368182.25	301698.65	291709.34	336864.72	179414.67	1386944.0	344327.57	369551.49	337595.41
MW9485	Thioetheramide-PC	C40H83N2O5PS	717.5543	734.576	0.7354	11.0957	2-search-DB	116457-99-9	--	C04873	63018.0	1.0	-	-	975598.97	692742.6	1454915.44	965985.62	1053085.58	992720.32	973775.82	49426.79	106521.15	542980.67	61955.09	22174.82	21059.03	21565.99	11241.12	19146.66	35068.94	24310.17	25809.96	20645.87	133723.94	131934.74	129799.05
MW2877	Thiodicarb	C10H18N4O4S3	375.0254	354.049	0.5285	1.7273	1	59669-26-0	--	C18423	72231.0	1.0	-	-	67657.46	106321.28	71488.47	125371.14	138371.89	74713.25	117222.82	88870.23	70167.98	81135.9	88224.71	252414.37	237908.96	123539.15	117971.35	114458.24	129773.85	89981.75	116205.29	170498.68	111366.49	116074.42	113291.84
MW9484	Thiodiacetic acid sulfoxide	C4H6O5S	184.0279	165.9936	0.6161	13.8571	1	33388-14-6	--	C14873	--	1.0	-	-	179188.52	140434.56	90792.15	210643.1	174077.88	92642.71	228121.8	138063.91	132720.49	75369.27	136057.5	178675.88	91646.67	100617.43	105092.62	144738.95	93227.17	63828.25	168151.98	206510.74	139135.65	137562.4	133367.6
MW9483	Thiodiacetic acid	C4H6O4S	322.9873	149.9987	0.5995	4.0775	1	--	HMDB0042032	C14872	--	1.0	-	-	47795.57	11416.08	6591.56	36920.4	7354.87	7521.63	6957.12	8117.7	3413.2	7961.66	6961.58	10953.63	161.74	7375.92	5367.96	219.78	7760.91	4961.67	3943.17	511.57	18422.68	18378.77	18107.63
MW2876	Thiocyanic acid	CHNS	57.9759	58.983	0.6339	6.513	1	463569	--	C01755	--	1.0	-	-	16619.36	248.25	14316.8	10015.0	10878.59	177.79	176.38	8701.52	15546.47	12972.61	65075.47	36203.57	47627.63	61967.08	62963.23	64959.18	66624.69	1726.66	1737.38	39140.5	20469.83	21354.44	21257.01
MW9482	Thiocarlide	C23H32N2O2S	801.4458	400.2184	0.5868	4.9586	1	910-86-1	--	D07246	64625.0	1.0	-	-	63890.33	3831.89	69513.86	47705.48	69184.79	58602.69	69531.94	57173.72	75285.33	60790.89	1091.65	1607.73	762.86	580.39	1737.09	589.61	1503.37	2891.33	669.96	4748.85	4185.64	4536.11	4476.14
MW9481	Thioacetamide	C2H5NS	151.0355	75.0143	0.6189	13.8322	1	62-55-5	--	C19302	--	1.0	-	-	156620.6	108279.21	73639.25	52654.11	68120.81	102958.91	74623.36	151419.0	218721.79	87499.65	118601.4	82749.02	76236.87	59782.71	56183.51	78805.81	49519.91	94843.15	36562.72	108153.84	85224.19	82888.72	83561.55
MW9480	Thimerosal	C9H10HgO2S	422.9741	384.0108	0.6389	4.1424	1	--	--	D00864	43346.0	1.0	-	-	2225.39	61.88	326.9	64.96	212.37	437.84	121.25	155.72	284.23	179.01	13021.41	273.6	820.12	9372.0	11193.6	8865.04	10388.1	5464.19	5702.63	114.35	4557.94	4507.45	4241.1
MW2875	Thifensulfuron-methyl	C12H13N5O6S2	403.0502	387.0307	0.637	4.6929	1	79277273	--	C10957	--	1.0	-	-	3782.54	6990.99	3956.71	6890.75	3147.17	4826.51	4355.69	5405.81	3175.5	3615.63	10902.34	8699.11	9352.73	9532.74	10296.96	11618.69	9458.66	19063.52	20257.99	6386.66	10462.29	10505.01	10685.79
MW9478	Thienodolin	C11H7ClN2OS	501.0006	249.9968	0.6318	3.9782	1	149127-27-5	--	C09245	--	1.0	-	-	354.68	9451.61	2660.46	2397.73	9120.44	3485.05	11001.96	2967.62	4514.07	580.84	5504.42	25313.07	5497.64	6387.99	5847.4	6420.9	7061.62	14346.38	14708.44	4161.11	37219.17	37417.66	37204.54
MW9476	Thiamylal	C12H18N2O2S	301.1215	254.1089	0.6358	5.7232	1	--	HMDB0015285	C07846	--	1.0	-	-	18880.72	13748.85	18208.06	24555.57	6368.09	18233.29	5049.64	12869.63	30848.32	44981.89	13724.63	1029.23	8020.76	13713.51	13111.02	14655.49	9806.35	14815.71	15779.21	254.54	15208.47	14860.33	14686.96
MW2873	Thiamine pyrophosphate	C12H19N4O7P2S	406.0266	425.045	0.6137	4.5212	1	--	HMDB0001372	C00068	--	1.0	-	-	269.99	256.94	429.21	315.78	78.26	93.09	205.07	373.03	830.95	185.49	10551.52	522.66	6440.54	10419.92	11298.59	9362.93	9795.18	967.21	929.57	640.87	3555.2	3520.36	3594.21
MW9475	Thiamine disulfide	C24H34N8O4S2	607.185	562.2144	0.6145	0.7533	1	--	--	C18377	--	1.0	-	-	38726.55	12369.45	18240.23	9853.34	8417.97	6961.51	9454.86	7844.88	23517.37	12575.33	11191.82	18876.58	1893.73	10853.18	13126.46	14398.88	11743.83	14717.06	18290.04	14171.74	17604.24	17047.56	17140.01
MW2872	Thiamine aldehyde;Thiamin aldehyde	C12H15N4OS	284.0705	263.0967	0.5815	2.5582	1	--	--	C05856	--	1.0	-	-	14765.57	4593.67	12564.41	20116.58	17461.83	28941.94	15734.29	28162.55	6680.81	22091.39	2747.2	2791.79	2633.06	2516.27	3260.59	2910.37	2672.47	4036.26	1164.04	1496.13	4171.22	3973.69	4086.33
MW2870	Thiadiazolidinone;5-(4-Bromophenylimino)-3,4-tetramethylene-1,3,4-thiadiazolidin-2-one	C12H12BrN3OS	345.9628	324.9884	0.6281	2.4667	1	--	--	C10973	--	1.0	-	-	64721.09	118182.04	94949.29	84653.43	107686.11	116909.5	191343.97	152138.92	106542.99	189163.98	149427.81	79792.2	27226.01	108579.67	102049.13	72949.05	61930.88	70820.93	107212.85	134684.39	62734.47	63563.47	64861.4
MW9472	Thiabendazole	C10H7N3S	265.0521	201.0361	0.6353	2.5527	1	--	HMDB0014868	C07131	--	1.0	-	-	6241.47	3396.41	4861.58	4314.08	504.17	4399.69	823.3	4418.24	4472.14	5106.17	21616.56	4052.33	6401.76	21356.25	17129.49	25625.26	20802.1	15826.52	6383.05	4191.62	6781.79	7090.64	7123.38
MW9470	Thermocryptoxanthin-13	C59H90O7	987.5896	910.6687	0.5922	4.5101	1	--	--	C15954	--	1.0	-	-	97204.93	57427.93	6430.86	64765.03	54121.54	41334.42	74561.55	35359.94	39474.7	12903.01	72121.32	80824.66	78467.22	79214.83	48277.22	66369.4	69364.14	82654.4	64842.56	77678.42	75175.28	72101.18	74226.45
MW2868	Thapsigargin	C34H50O12	687.2781	650.3302	0.6155	9.6456	1	67526-95-8	--	C09561	41196.0	1.0	-	-	81270.4	15385.94	38450.67	27021.61	17047.09	20113.74	13440.71	14099.0	8784.27	32759.87	56220.63	24447.67	13744.17	53461.3	30300.53	44393.86	81209.16	28883.21	20221.77	22425.19	37053.13	37400.11	38681.8
MW2867	Thallium sulfate	Tl2SO4	486.8813	505.9006	0.5624	13.3131	1	7446-18-6	--	C18567	--	1.0	-	-	50028.76	52594.69	48376.96	53814.64	56306.47	52740.41	55610.52	55271.42	48722.52	50007.99	49237.84	55099.15	48429.74	49741.21	51993.43	53418.62	49296.59	43037.81	44547.39	49076.96	57024.06	55892.75	57022.45
MW9466	Thalicarpine	C41H48N2O8	741.313	696.3411	0.6257	0.895	1	5373-42-2	--	C09655	--	1.0	-	-	106369.75	59204.54	29263.42	28657.63	35593.85	14379.32	32338.08	13666.79	23055.95	12188.09	4800.0	20231.04	15251.76	1430.33	1747.82	2412.64	3125.83	3685.46	3565.72	15161.71	16498.87	16387.44	16502.02
MW2654	Tetrasul	C12H6Cl4S	320.8863	321.8944	0.5917	13.8912	1	2227-13-6	--	C19032	--	1.0	-	-	586394.13	887403.93	1665533.45	687939.11	723031.52	1781690.15	841698.21	914658.86	881307.32	1690431.53	1949338.03	157892.51	987723.68	1541359.29	1788530.8	536744.1	688042.11	301921.61	1484115.23	730831.07	925874.79	1111198.93	1173507.17
MW9266	Tetraprenyl-beta-curcumene	C35H56	970.9091	476.4382	0.612	1.0556	1	--	--	C20276	--	1.0	-	-	12473.65	9417.87	11778.79	1100.12	6759.77	3056.93	5999.79	4406.07	14912.08	6510.94	20853.32	7112.07	871.1	20828.77	15092.6	21499.55	21517.19	46086.37	38311.63	1497.41	9515.63	9705.79	9059.94
MW9263	Tetranor-12(R)-HETE	C16H26O3	267.1955	266.1882	0.6498	9.3373	1	135271-51-1	--	--	35513.0	1.0	-	-	21861.91	630.54	2547.6	3140.6	897.27	1432.03	1097.48	2619.34	16193.53	20333.06	1177.15	416.68	537.18	454.13	595.07	959.09	431.27	2660.9	1502.7	69.47	5939.05	5808.44	5906.37
MW9262	Tetraneurin E;Ambrosanolide	C17H24O6	391.1107	324.1573	0.6392	10.7995	1	25383-30-6	--	C09560	--	1.0	-	-	1774.66	7219.6	2112.14	2975.52	11036.86	3214.11	4112.81	2291.92	9818.67	7440.71	8219.55	10928.32	2860.52	8446.49	4223.44	6840.21	5071.13	9771.4	6832.44	10987.85	10899.16	10891.32	10560.21
MW2652	Tetraneurin A	C17H22O6	643.2761	322.1416	0.641	4.3537	1	22621-72-3	--	C09559	--	1.0	-	-	32366.11	21525.78	18389.09	15293.23	16051.19	13144.75	15189.24	11626.24	15395.66	11700.09	13655.06	10951.53	15185.83	15915.85	12906.84	14628.48	14857.15	22692.08	18952.64	6178.15	16040.11	16034.37	16166.84
MW9259	Tetrahydrosarcinapterin;H4SPT;5,6,7,8-Tetrahydrosarcinapterin	C35H52N7O19P	950.2766	905.3056	0.6413	4.8972	1	137360-17-9	--	C18802	--	1.0	-	-	6339.24	3628.42	6805.97	4800.39	953.68	633.16	4204.56	876.9	7263.42	8582.19	29310.29	3482.89	3077.04	33955.03	33363.69	26457.36	29859.46	30011.83	24106.69	1559.53	11563.11	12481.2	11842.8
MW9258	Tetrahydropteridine	C6H8N4	119.0725	136.0749	0.5782	2.1503	1	--	HMDB0001216	C05650	--	1.0	-	-	188522.17	106029.55	80219.08	117219.37	107754.14	95905.35	101844.84	86334.95	121239.38	75941.4	102127.68	306543.27	175079.57	42595.74	96311.49	111410.15	125338.36	150875.08	126831.88	205749.95	132446.83	133298.85	136656.3
MW2650	Tetrahydrogeranylgeranyl diphosphate	C20H40O7P2	435.2055	454.2249	0.5461	7.9676	1	--	--	C17440	--	1.0	-	-	1201422.74	66615.27	540826.52	362075.49	166343.14	972067.11	157468.68	878759.17	135681.21	517492.45	1187071.02	55264.5	882769.35	1430782.82	1409285.54	1717472.14	1228379.35	1502663.39	1125621.08	7943.24	744838.3	758418.59	756750.99
MW2645	Tetrahydrodeoxycorticosterone	C21H34O3	369.2281	334.2508	0.7616	6.5421	2-MetDNA	--	HMDB0000879	C13713	--	1.0	-	-	12424557.41	790810.69	2568812.83	3105087.05	2505108.16	12142518.46	3656103.14	9852420.96	6342230.51	5212124.91	1516375.32	257733.35	331441.21	2024744.27	1404587.26	2081827.23	2168576.39	2173504.91	2276418.93	26652.87	4183416.34	4182554.15	4130225.25
MW9256	Tetrahydrocortisone;Urocortisone	C21H32O5	387.2145	364.225	0.6394	6.4149	1	53-05-4	HMDB00903	C05470	--	1.0	-	-	42878.12	276.8	771.37	1469.11	1577.29	5517.05	1248.1	2033.41	23742.78	87.83	107.0	144.29	525.85	392.25	161.58	65.42	240.31	805.11	521.82	130.91	4882.85	5040.54	5057.79
MW2644	Tetragastrin	C29H36N6O6S	612.2604	596.2417	0.8711	9.5957	1	--	HMDB0005775	D01456	--	1.0	-	-	258482.82	4827.27	8869.83	15646.53	3717.42	20432.56	2031.03	12568.25	9715.65	6138.83	73623.69	52732.12	77274.75	106646.34	68081.67	118071.66	124089.86	52741.8	49562.04	88306.6	42412.27	43388.45	45908.69
MW9253	Tetraethylene glycol	C8H18O5	195.123	194.1154	0.7666	2.5604	2-search-DB	--	HMDB0094708	--	--	1.0	-	-	103845.88	100209.06	63016.5	81017.63	94564.21	71652.99	127707.33	152450.02	69636.44	88992.56	66570.8	61828.92	124374.9	76155.38	66510.68	62192.29	65845.58	88887.76	83736.0	63922.47	229249.66	230447.06	232280.27
MW9252	Tetraethylammonium cation	C8H20N	130.1591	130.1596	0.6495	4.46	1	66-40-0	--	C07512	--	1.0	-	-	150723.25	85762.15	57431.38	91532.36	210679.26	231648.45	105936.22	239883.78	72642.36	235375.8	51109.06	37326.72	72828.63	46210.9	150512.53	121087.83	44656.17	41383.28	44236.03	41882.24	71095.03	70853.31	69279.1
MW2643	Tetraethyl dithiopyrophosphate	C8H20O5P2S2	342.9975	322.0227	0.6439	2.9821	1	3689-24-5	--	C18691	--	1.0	-	-	17635.25	2116.28	2184.87	23902.69	3248.26	10264.9	3640.66	5255.89	16456.5	422.09	31274.33	15396.08	1698.03	31896.26	21928.2	40715.42	42109.56	15810.0	13100.57	19859.59	27876.9	27875.84	27790.2
MW9251	Tetradecylamine	C14H31N	290.1571	213.2456	0.5418	10.0491	2-search-DB	2016-42-4	--	--	3313.0	1.0	-	-	50822.6	12607.68	28376.29	30697.76	16729.08	29568.53	14728.86	17102.09	9018.36	21568.54	88199.56	38824.37	29526.84	85846.69	77734.74	76988.95	83754.77	23785.23	20335.29	26705.91	52352.8	51340.04	52139.2
MW9249	Tetradecanoylcarnitine	C21H41NO4	410.2672	371.3036	0.6132	8.4978	1	--	HMDB0005066	--	--	1.0	-	-	60787.84	1302.39	4259.6	1433.9	1531.44	2762.21	2306.52	1440.93	18866.31	1625.57	21234.14	19692.58	2298.9	15452.41	10604.2	23338.56	26928.11	2727.7	4280.45	22612.77	4515.25	4806.41	4579.98
MW9248	Tetradecanoyl-CoA	C35H62N7O17P3S	942.2959	977.3136	0.5311	5.013	1	--	HMDB0001521	--	--	1.0	-	-	7455.09	823.62	4561.99	793.74	495.58	2799.31	698.63	239.17	244.56	5617.5	7013.8	21247.2	37693.04	4695.2	6189.08	7750.71	7070.57	24515.71	26935.24	22428.3	11318.71	11262.6	10821.35
MW2641	Tetrachlorobisphenol A;3,3',5,5'-Tetrachlorobisphenol A;Tetrachlorodian;2,2-Bis(4-hydroxy-3,5-dichlorophenyl)propane	C15H12Cl4O2	384.9347	363.9591	0.582	0.5478	1	79-95-8	--	C14528	--	1.0	-	-	309873.68	279270.23	281820.09	310231.82	305324.94	292144.04	269427.46	230129.07	300821.41	294680.09	302936.94	284400.39	249913.99	270647.09	288831.22	264718.03	286342.63	308346.31	129099.15	254750.03	306569.76	303641.76	306464.24
MW9239	Testosterone;17beta-Hydroxy-4-androsten-3-one	C19H28O2	336.2258	288.2089	0.9918	5.4655	2-MetDNA	58-22-0	HMDB00234	C00535	--	1.0	-	-	825023.1	359007.86	554183.65	356404.49	579192.96	1402325.65	738489.06	903270.99	478305.51	2046130.21	1029071.33	241789.42	284630.25	933292.35	826236.88	565049.82	772714.14	635732.65	416476.48	28161.89	483381.77	503584.12	488607.81
MW2640	Testosterone glucuronide	C25H36O8	501.1892	464.241	0.622	6.6153	1	--	HMDB0003193	C11134	--	1.0	-	-	51662.48	1616.46	21349.8	29713.62	8595.99	56378.71	4986.33	55527.89	6541.84	27911.76	10610.08	511.17	6858.95	10674.75	9772.56	7538.46	13060.23	32327.13	32540.66	8394.31	31789.74	31843.0	31072.17
MW9234	Testosterone decanoate	C29H46O3	519.2643	442.3447	0.6213	4.0152	1	5721-91-5	--	C14607	--	1.0	-	-	26107.71	24692.23	13143.41	11735.13	20105.43	13408.95	22269.51	9275.63	18389.87	7220.22	734.47	14208.48	73547.6	539.76	1234.16	8032.76	10638.0	27212.21	23680.25	16057.0	36179.33	36875.39	36124.71
MW9233	Testololactone;3-Oxo-13,17-secoandrost-4-ene-17,13alpha-lactone	C19H26O3	350.2027	302.1882	0.8884	5.8144	2-MetDNA	4416-57-3	--	C04676	--	1.0	-	-	92309.5	8050.52	34311.27	79437.32	45433.14	93453.48	38037.02	96343.84	29234.71	68506.53	170574.4	14314.95	224235.07	144380.94	164780.92	174795.81	170682.04	98156.47	89164.75	11873.44	106955.06	109691.31	106572.67
MW9232	Tertatolol	C16H25NO2S	296.1671	295.1606	0.5864	4.3356	1	--	HMDB0042026	D07182	--	1.0	-	-	95313.18	3983.74	40111.03	46387.41	68772.61	78974.63	63198.67	70820.6	69965.85	65496.45	8326.51	4355.47	10356.33	9561.65	6135.11	10641.04	7058.31	11382.17	15420.06	14148.52	40608.65	40602.38	40333.16
MW9230	Terrestriamide	C18H17NO5	693.185	327.1107	0.6328	6.7948	1	--	--	C17839	--	1.0	-	-	7.18	7.65	15.7	8.62	16.71	10.13	23.65	17.98	60.67	15.56	30.11	14.68	19.59	98.97	53.61	53.91	116.98	244.33	193.81	18.52	843.75	828.43	840.7
MW9229	Terpineol	C10H18O	141.1135	154.1358	0.5895	13.2426	1	98555	--	C16772	--	1.0	-	-	5070991.53	5330427.31	4448974.32	5283319.52	4612047.79	4558516.54	4719881.31	4803661.68	4260364.9	4425436.65	3724942.71	3479601.6	3158521.57	4172489.6	3826496.74	3629699.08	3352069.64	2769052.53	2976656.09	2755023.36	3587754.28	3645788.61	3432244.46
MW2639	Ternatin C5;Delphinidin 3-O-(6''-O-malonyl)-beta-D-glucoside-3',5'-di-O-beta-D-glucoside	C36H43O25	891.228	875.2093	0.628	2.3541	1	--	--	C16303	--	1.0	-	-	1820.33	821.82	245.44	1385.07	1974.31	1512.25	764.27	209.36	1120.85	2919.23	13414.14	274.25	349.23	11662.79	14277.7	13845.24	11344.16	22602.81	16330.34	4502.25	2532.16	2605.82	2566.37
MW9228	Termitomycamide B	C28H40N2O2	500.3262	436.309	0.5621	10.0667	1	1254277-89-8	--	--	96488.0	1.0	-	-	40239.28	550.9	3339.37	7319.17	1164.67	5327.74	830.32	1323.08	606.51	1219.45	34553.97	9880.21	5791.59	38407.66	23999.69	36834.59	47455.09	2412.58	1594.71	11300.18	18383.77	18451.96	18829.58
MW9227	Terminalin;Gallagic acid	C28H10O16	566.9827	601.9969	0.6315	4.238	1	155144-63-1	--	C10242	--	1.0	-	-	2335.73	10266.69	3645.47	24697.3	15251.27	5929.4	14662.02	6531.83	15295.48	2819.04	1937.07	11852.7	425.71	888.18	729.15	954.16	662.98	4139.22	4282.45	418.86	10753.45	10442.61	10322.05
MW9226	Terconazole	C26H31Cl2N5O3	238.5639	531.1804	0.7317	1.2485	1	--	HMDB0014396	C08080	--	1.0	-	-	116285.79	142704.54	158525.66	168300.56	91662.76	134265.41	130790.81	205998.36	114079.62	241270.04	91002.67	51087.81	60619.62	101815.07	108531.59	91629.95	76477.7	94636.81	104837.08	32468.89	136497.9	132991.2	136821.72
MW2637	Tepraloxydim	C17H24ClNO4	360.1381	341.1394	0.6339	1.6549	1	149979-41-9	--	C18540	72346.0	1.0	-	-	66794.36	32358.88	45581.77	46871.16	24913.4	45239.98	29984.68	49553.81	14757.05	30076.31	41376.87	44195.51	98837.99	36674.66	39676.74	34339.7	36390.56	33290.86	46770.5	16513.81	30006.2	31104.98	30149.76
MW2636	Tenovin-1	C20H23N3O2S	390.1254	369.1511	0.6169	4.2197	1	380315-80-0	--	--	45455.0	1.0	-	-	83087.94	131705.26	77636.36	97811.84	94146.64	99629.1	94887.76	85697.86	75545.67	75565.41	118478.8	50425.17	11632.47	100990.92	118093.34	90395.42	116940.62	97389.76	94371.61	47877.82	92724.8	92581.25	92726.06
MW9224	Telomestatin	C26H14N8O7S	600.1041	582.0706	0.6261	3.8857	1	--	--	C12040	--	1.0	-	-	891.29	101.56	264.8	170.82	653.49	1088.82	525.98	93.75	134.46	210.07	29240.11	12355.47	1745.26	11241.65	17399.24	18901.11	7679.17	3935.99	1041.34	7610.56	3360.1	3315.96	3147.64
MW2635	Tellimagrandin I;1-Desgalloyleugeniin	C34H26O22	785.0876	786.0916	0.5271	1.0274	1	79786-08-6	--	C10241	--	1.0	-	-	16035.51	14237.67	18142.68	25856.51	18646.14	17343.59	18522.41	22193.75	21358.81	23458.75	1485.21	5813.42	2923.95	1836.27	4354.73	2757.1	3959.97	2164.5	5645.18	713.89	15013.54	14025.44	14950.73
MW9223	Telaprevir	C36H53N7O6	718.3667	679.4057	0.5549	4.0656	1	--	HMDB0015616	D09012	--	1.0	-	-	48674.16	11932.21	23481.79	14043.83	4682.46	5488.74	2670.4	3394.51	10306.02	12475.17	45525.07	18909.25	127195.34	54556.44	45662.22	69983.74	67420.82	59202.84	31597.47	76040.55	34319.24	21983.12	37433.32
MW2634	Teflubenzuron	C14H6Cl2F4N2O2	395.9953	379.9742	0.5239	1.0918	1	83121180	--	C18437	--	1.0	-	-	4021.05	3755.42	5010.94	595.76	342.72	1868.74	3913.33	444.78	3069.15	327.59	18551.19	2045.36	36172.07	25315.42	22537.97	21559.83	26692.61	4764.76	2983.7	2897.25	3902.94	3935.39	3939.79
MW2633	Tecomine;Tecomanine	C11H17NO	357.2546	179.131	0.6455	6.4133	1	6878-83-7	--	C09988	--	1.0	-	-	40730.04	1216.32	13342.09	17511.71	14514.71	35986.45	13726.13	32981.3	35949.01	14198.22	34521.56	1259.25	8604.22	29764.44	27915.71	23015.08	30115.14	21179.91	24228.41	232.24	24613.28	24405.99	24590.52
MW2629	Tazobactam	C10H12N4O5S	299.0453	300.0528	0.6305	11.4918	1	--	HMDB0015544	C07771	--	1.0	-	-	17.81	8.55	3.48	65.92	13.94	2.58	53.56	4.83	13.71	20.73	54.97	4.22	89.06	16.28	15.25	8.5	163.08	9.96	24.06	10.94	675.4	721.79	733.28
MW9217	Taxiphyllin;(R)-4-Hydroxymandelonitrile beta-D-glucoside	C14H17NO7	356.0711	311.1005	0.5969	12.6385	1	21401-21-8	HMDB30704	C01855	--	1.0	-	-	7746.33	7734.4	13954.43	16490.18	15861.37	23584.04	20606.02	20191.42	5181.38	5337.23	9204.14	2884.58	5738.15	6737.89	6980.52	6963.35	6005.59	4333.32	2859.15	2317.91	70247.12	76793.17	47498.06
MW9216	Tauropine;N2-(D-1-Carboxyethyl)taurine	C5H11NO5S	198.0437	197.0358	0.6029	13.4921	1	33497-79-9	--	C01616	--	1.0	-	-	33312.38	43588.71	50640.19	33409.41	30007.8	25053.66	36362.53	33851.34	23140.08	33422.91	36080.16	30871.74	32631.23	25909.17	34134.64	24007.26	17106.43	33133.07	27082.77	34959.51	29527.58	30526.07	30440.73
MW2628	Taurolithocholate	C26H45NO5S	520.2501	483.3018	0.6298	5.0715	1	516-90-5	--	C02592	--	1.0	-	-	14463.71	2778.87	6522.68	30721.03	37132.9	5792.28	40582.68	8467.74	63830.09	13104.44	29882.41	4459.68	17178.37	34428.05	28262.65	31044.09	33310.93	14222.52	19679.59	1200.24	26561.55	27856.0	28058.16
MW2627	Taurocholic acid	C26H45NO7S	514.284	515.2917	0.6298	6.3192	1	--	HMDB0000036	--	--	1.0	-	-	45734.84	20343.17	65488.8	20415.47	113029.66	145231.3	106004.67	130600.23	80135.09	116054.82	105872.34	6083.37	23344.83	109245.73	94622.56	105789.07	106268.4	20780.47	8571.54	1620.74	73745.69	74886.28	74581.25
MW2626	Taurochenodesoxycholic acid	C26H45NO6S	499.2869	499.2968	0.7324	7.5833	2-MetDNA	--	HMDB0000951	C05465	--	1.0	-	-	60684.02	4609.64	1842.35	11921.52	2951.34	5787.89	2426.38	3339.88	25547.82	1252.52	25211.92	28844.17	28669.53	25930.23	25015.54	22628.74	26876.91	2321.78	2542.56	34797.53	16695.22	17601.67	17531.42
MW2625	Taurine	C2H7NO3S	124.0074	125.0147	0.6487	0.8318	1	107-35-7	HMDB0000251	C00245	31.0	1.0	-	-	1375161.92	687320.93	788631.93	1014433.85	922359.59	390018.08	1872492.31	411504.13	592677.57	469506.17	907686.37	671459.57	623997.65	441857.61	861672.52	904114.63	886343.59	317951.23	396606.27	1501699.08	810495.96	891012.52	880900.03
MW2623	Tartronate semialdehyde	C3H4O4	103.0033	104.011	0.9827	0.9194	2-MetDNA	--	HMDB0006938	C01146	--	1.0	-	-	10979.55	6231.06	10348.16	13492.03	8553.27	22317.15	10148.46	20924.72	8886.17	26434.97	8223.89	4976.57	8954.58	5766.45	6849.96	4684.21	3512.69	5478.39	5216.39	3021.76	12394.08	13318.8	13218.9
MW9214	Tapentadol	C14H23NO	239.212	221.178	0.637	7.4844	1	--	--	D06007	96332.0	1.0	-	-	20217.76	22797.18	18692.75	20304.05	21448.52	22852.04	20984.09	25928.5	26947.74	21576.39	17876.43	17574.49	18586.81	20247.42	17710.06	15542.35	19004.23	18366.89	14940.04	9775.74	21059.26	21407.66	21015.93
MW2621	Tandutinib	C31H42N6O4	578.3462	562.3268	0.6447	10.3266	1	387867132	--	D06005	--	1.0	-	-	105349.93	101052.16	64018.65	123740.69	55796.23	194546.14	60821.17	135311.02	982.63	139241.6	30154.6	42693.03	49275.46	31174.9	24294.98	30861.92	37010.71	21217.74	18817.1	30419.4	141013.1	140906.61	138911.95
MW9213	Tamoxifen	C26H29NO	372.2324	371.2249	0.6388	3.1064	1	--	HMDB0014813	C07108	--	1.0	-	-	645.1	1211.45	76.28	674.55	103.2	11687.79	209.03	14634.13	482.58	18045.22	93304.0	24088.58	110316.94	104518.3	95893.76	120149.2	108607.99	206281.19	185272.15	35238.99	58007.8	58947.84	58095.28
MW9212	Talc	Mg3Si4O10(OH)2	794.599	377.8175	0.6191	11.2396	1	14807-96-6	--	C19292	--	1.0	-	-	864625.6	558762.86	876935.93	777952.79	290912.45	298425.61	332184.69	378602.84	791020.02	406373.95	1883434.18	1755651.5	2344289.4	2081628.49	4807380.15	3171334.63	2743710.57	8479587.23	1259890.47	2669388.74	1291746.88	2303110.18	2070158.19
MW2619	Talampicillin hydrochloride	C24H23N3O6S.HCl	1033.2083	517.1074	0.6261	2.342	1	39878-70-1	--	C13978	--	1.0	-	-	10688.44	1479.85	5911.45	6194.15	18838.34	1501.09	22010.12	1388.82	11645.65	3773.43	466.85	2373.38	127.8	645.15	183.62	318.1	261.98	1534.91	741.07	4102.06	6240.79	6199.82	6148.0
MW9645	TXB2-d4	C20H30D4O6	766.5517	374.2602	0.5462	4.9753	1	--	--	--	36264.0	1.0	-	-	120392.72	124993.91	87609.98	91578.92	91416.07	99989.15	105938.86	160835.61	72043.19	57398.96	12807.82	60443.05	7116.62	4646.42	15577.26	15704.79	9044.05	29973.95	35703.55	18833.87	21015.46	22050.22	22033.95
MW2985	TXB1	C20H36O6	353.2322	372.2512	0.822	6.2229	1	64626-32-0	--	--	36262.0	1.0	-	-	102143.9	5354.94	39942.51	113898.09	45343.7	95863.41	117484.57	98371.95	55978.29	82449.14	124115.31	11095.02	67850.84	119810.71	180914.81	119665.9	171486.28	263914.97	122267.31	2530.62	121582.08	135910.7	126821.47
MW2959	TRIPTOPHENOLIDE	C20H24O3	311.1684	312.1725	0.7198	13.2306	2-search-DB	74285-86-2	--	--	44381.0	1.0	-	-	3301357.33	5714294.9	2241782.88	2124559.32	2606500.5	2941220.19	4265114.58	2371381.13	2573812.09	3332883.75	7818363.36	6800014.8	6618478.95	6549307.76	6161081.04	6872472.2	7168543.74	7074162.94	7253248.2	9568380.32	4721065.97	5294373.17	5365800.01
MW2920	TOTAROL-19-CARBOXYLIC ACID	C20H28O3	271.2064	316.2038	0.7404	6.563	1	--	--	--	44467.0	1.0	-	-	25275.12	160.46	749.26	1621.26	531.81	11340.71	204.76	11569.03	4082.33	2839.31	443.96	1627.02	181.92	377.78	503.73	43.36	109.61	15368.28	14588.39	55.62	6318.56	6271.07	6087.22
MW9540	TOLTERODINE	C22H31NO	348.2276	325.2406	0.6612	3.8328	1	124937-51-5	HMDB0015170	C07750	43895.0	1.0	-	-	373.39	287.24	291.52	1739.93	223.64	359.63	499.61	972.67	132.57	336.42	27863.34	46134.61	114100.81	33467.9	20483.08	25046.89	32762.03	15662.88	6954.65	31784.11	14787.91	13630.82	14848.43
MW2915	TOFA	C19H32O4	305.2119	324.23	1.0	6.8121	1	54857-86-2	--	--	34518.0	1.0	-	-	141420.16	11627.78	52138.43	54754.28	58737.31	124176.17	58160.03	108187.34	68410.23	98601.88	96349.65	2514.27	64768.61	97992.28	84884.58	100743.02	103497.81	122191.06	105563.14	427.73	84245.19	83814.17	84386.63
MW9523	THTC;2-n-Tetrahydrothiophenecarboxylic acid	C5H8O2S	133.0317	132.0245	0.6458	1.0941	1	--	--	C11074	--	1.0	-	-	49407.81	43658.0	43178.54	50739.86	61481.66	52812.12	61301.97	48044.51	59473.59	42326.13	106275.07	100507.74	128775.93	96277.59	102625.78	97910.77	92982.32	138637.35	105603.23	131433.87	72574.37	73957.86	73521.9
MW9471	THF-L-glutamate;Tetrahydropteroyldiglutamate;(6S)-H4PteGlu2	C24H30N8O9	613.1775	574.2136	0.6128	4.053	1	--	--	C09332	--	1.0	-	-	98253.46	39110.03	67090.58	34455.97	9843.78	6945.42	13785.86	5349.97	22452.56	38858.96	96240.67	126120.95	85534.88	106160.11	103470.13	111594.85	123853.06	105920.57	93058.31	150744.42	79768.34	79704.53	80891.49
MW9465	TG(i-24:0/i-24:0/i-16:0)	C67H130O6	568.9845	454.1111	0.5645	4.834	1	--	HMDB0069322	--	--	1.0	-	-	50060.11	16109.12	39881.08	35559.39	30616.37	30405.14	31302.82	22660.15	28973.35	19040.43	1327.94	5533.9	2133.55	2134.23	303.33	537.37	1082.35	3436.68	2315.97	1037.38	6745.02	7549.16	7784.0
MW2866	TG(i-24:0/i-21:0/a-21:0)[rac]	C69H134O6	280.9886	244.0405	0.6081	1.0669	1	--	HMDB0070024	--	--	1.0	-	-	29045.15	6167.89	58662.92	16157.38	953.36	12371.66	2381.76	54068.05	22537.85	37919.96	76563.09	29798.22	147864.78	63738.11	71676.26	70604.63	72561.42	212925.11	122889.87	15884.81	51729.9	53308.41	51247.7
MW9464	TG(i-24:0/i-20:0/a-15:0)[rac]	C62H120O6	894.2331	438.0985	0.5708	0.769	1	--	HMDB0069821	--	--	1.0	-	-	17911.11	50285.62	17844.98	47291.7	52512.16	19656.71	55486.24	22696.61	20727.84	18539.43	4050.36	11889.78	2282.99	5367.74	3082.99	1321.13	3625.24	442.21	2102.32	25287.44	16343.9	16106.08	16328.34
MW9462	TG(i-24:0/i-14:0/20:0)	C61H118O6	676.9016	562.0265	0.6435	4.7108	1	--	HMDB0069797	--	--	1.0	-	-	109409.02	298797.59	298796.08	118889.87	498109.73	233968.44	288089.79	345592.32	211438.57	184161.08	1173.79	78726.1	2920.27	2127.49	26333.9	2896.87	31968.42	76148.03	14876.0	65709.52	35547.53	38316.58	28408.28
MW2865	TG(i-24:0/i-13:0/16:0)	C56H108O6	499.1859	483.1675	0.8407	5.4827	1	--	HMDB0070082	--	--	1.0	-	-	41213.82	64310.64	140529.18	559102.64	304730.8	872389.59	412941.78	259267.18	966419.0	160501.62	216534.33	50354.27	23354.71	109165.93	162754.92	130515.06	115065.83	23951.74	77160.88	2971.36	181130.88	189260.2	185086.33
MW9460	TG(i-24:0/a-17:0/12:0)[rac]	C56H108O6	658.1012	658.1017	0.6485	10.3121	1	--	HMDB0069791	--	--	1.0	-	-	3970.76	4875.78	3868.46	4635.31	3972.89	3614.97	67.02	63.04	3504.9	75.3	242.69	5808.49	27190.41	931.56	535.62	92.79	233.97	143.57	218.21	4790.75	8411.27	8773.16	8810.55
MW2864	TG(i-24:0/a-15:0/i-22:0)[rac]	C64H124O6	183.0565	228.0456	0.6713	4.5743	1	--	HMDB0070008	--	--	1.0	-	-	10854.77	9244.88	18932.59	16508.24	12331.16	19437.29	10344.84	16453.65	11910.45	12642.78	7398.78	16431.21	4324.37	10962.97	6362.66	10241.11	9566.57	11644.71	10296.84	15300.94	15400.66	15669.81	16502.29
MW9459	TG(i-24:0/8:0/8:0)	C43H82O6	513.0323	398.1577	0.6283	1.5281	1	--	HMDB0069359	--	--	1.0	-	-	13016.45	11900.43	28577.87	27348.75	22197.83	37209.97	18882.69	51672.0	22833.23	47749.44	9137.01	1678.9	42096.13	4492.65	9059.73	4398.22	7860.45	3628.54	6901.17	11266.55	10747.17	12205.92	12362.12
MW2863	TG(i-24:0/21:0/i-21:0)	C69H134O6	715.1682	358.0875	0.6264	7.078	1	--	HMDB0070297	--	--	1.0	-	-	6011.44	14736.89	18087.43	13189.35	12604.74	5711.45	10833.94	6552.27	10545.25	12669.88	17857.35	14274.63	15021.19	12034.11	14887.3	10483.63	13268.22	10416.34	16204.31	12248.72	13259.5	13560.33	13229.03
MW9458	TG(i-24:0/21:0/i-15:0)	C63H122O6	538.1842	573.1992	0.5842	1.2169	1	--	HMDB0069672	--	--	1.0	-	-	8591.44	10434.54	7759.88	9325.37	2593.36	9889.69	5619.01	2232.62	7335.02	8296.51	11825.58	6093.16	2055.56	13491.07	10914.41	8496.61	12283.79	1618.61	1405.25	9519.3	27873.15	29087.94	27598.71
MW2862	TG(i-24:0/20:0/a-21:0)[rac]	C68H132O6	456.2409	440.2199	0.5364	5.833	1	--	HMDB0069644	--	--	1.0	-	-	56092.96	2464.53	7670.79	6473.76	78186.27	15244.66	52771.08	48107.89	37048.79	88504.23	28179.42	630.73	21934.69	22209.98	23926.61	23849.58	19354.01	25513.65	33949.38	17694.58	32353.24	34393.78	34794.61
MW9457	TG(i-24:0/19:0/a-15:0)[rac]	C61H118O6	226.1804	208.1463	0.6372	12.6524	1	--	HMDB0069347	--	--	1.0	-	-	97253.69	420452.4	8312.35	40722.98	183065.87	12416.52	23902.59	18487.71	6445.95	9591.44	44630.5	76460.02	25643.83	89778.95	32246.46	195472.37	37887.64	231464.17	45650.16	111998.53	22610.33	21238.45	18136.5
MW9456	TG(i-24:0/19:0/20:0)	C66H128O6	961.2945	469.1519	0.6033	5.0068	1	--	HMDB0070011	--	--	1.0	-	-	6193.96	11876.74	21652.15	13714.57	10139.07	7317.41	16056.74	7354.38	17954.74	15767.63	18925.84	5733.08	3643.21	3509.84	13496.48	2652.52	6433.54	5838.04	7579.1	7840.75	10839.02	11791.2	11231.96
MW9455	TG(i-24:0/19:0/10:0)	C56H108O6	459.2522	218.1307	0.547	4.1227	1	--	HMDB0069551	--	--	1.0	-	-	1609.61	1902.71	4014.93	3286.63	687.15	2409.16	517.05	495.03	1453.4	811.12	65738.12	48577.11	655.26	54287.94	57024.57	53086.79	69368.03	88601.05	80224.05	50867.3	36777.48	36487.08	34614.14
MW9454	TG(i-24:0/18:0/i-20:0)	C65H126O6	629.0551	303.0322	0.5788	5.0127	1	--	HMDB0069810	--	--	1.0	-	-	444.85	6104.22	1576.68	2609.31	4295.94	2190.56	4608.49	408.9	784.42	1063.04	396.98	382.75	201.26	382.58	298.96	339.44	405.8	280.17	91.41	80.28	2570.61	2500.68	2437.98
MW2859	TG(i-24:0/10:0/17:0)	C54H104O6	241.0179	242.0249	0.6252	4.1331	1	--	HMDB0070012	--	--	1.0	-	-	27733.34	19476.82	40570.13	34461.41	29372.57	30923.52	24828.12	29861.64	42596.54	12250.34	23776.54	6534.85	6448.62	16273.49	25088.56	12699.21	13287.71	20760.2	23194.26	4410.89	25266.36	25207.06	25427.77
MW2858	TG(i-22:0/i-24:0/21:0)	C70H136O6	527.2968	264.1514	0.576	9.578	1	--	HMDB0070279	--	--	1.0	-	-	92213.68	3584.04	6174.6	5175.27	2574.79	3202.32	3971.61	1462.86	6492.77	2676.14	7473.47	6356.24	2496.21	5256.36	5398.29	14348.14	15136.42	15345.64	8877.9	11062.13	16933.66	16657.97	16640.11
MW9453	TG(i-22:0/i-21:0/a-13:0)[rac]	C59H114O6	415.0534	368.0413	0.5936	1.5266	1	--	HMDB0069085	--	--	1.0	-	-	25167.75	41407.23	111087.3	104848.87	46725.19	147765.54	48385.45	146396.31	62243.26	138963.77	53401.85	7281.64	185032.96	46391.55	54172.44	43429.67	45039.13	52975.47	79678.65	1909.84	42110.31	43609.0	42830.77
MW9452	TG(i-22:0/i-19:0/20:0)	C64H124O6	758.2434	370.1053	0.6081	4.8748	1	--	HMDB0069022	--	--	1.0	-	-	23509.61	32753.31	53979.25	7831.84	33063.36	13492.9	14094.38	32878.36	37129.51	7660.46	2753.3	2439.87	1735.3	3071.12	1445.67	5117.3	2637.59	22249.75	5538.75	1933.4	10093.06	10413.7	10190.9
MW9451	TG(i-22:0/i-18:0/i-15:0)	C58H112O6	663.1062	586.1873	0.6442	10.5295	1	--	HMDB0068011	--	--	1.0	-	-	256.54	345.08	142.83	31.61	24.93	193.44	211.85	12.46	161.87	105.77	42.26	488.18	2241.77	116.8	51.01	64.5	39.78	70.11	57.49	11.27	1212.0	1217.14	1210.79
MW2857	TG(i-22:0/i-18:0/21:0)	C64H124O6	193.0238	370.0536	0.5773	2.7693	1	--	HMDB0067684	--	--	1.0	-	-	1239230.2	1064035.68	1310607.72	1044223.26	755256.47	894406.01	763869.05	1091661.07	1032061.76	1381577.99	1409565.39	1376050.73	719907.1	1456824.71	1454299.79	1405283.31	1256248.76	1330460.6	1343407.67	1335672.15	1044941.66	1043283.34	1050166.01
MW9450	TG(i-22:0/i-18:0/12:0)	C55H106O6	578.1272	514.1111	0.6363	12.6441	1	--	HMDB0067650	--	--	1.0	-	-	16363.23	15370.15	44571.06	47605.31	19528.67	96309.03	95061.35	93008.93	12802.21	7705.41	27811.16	4882.54	20133.92	21142.37	10021.84	12807.2	8055.78	7178.77	4682.84	2553.85	85404.4	91196.65	55182.25
MW2856	TG(i-22:0/i-16:0/15:0)	C56H108O6	559.211	522.2618	0.6137	5.0341	1	--	HMDB0068106	--	--	1.0	-	-	11064.25	1159.58	8627.51	24294.85	75164.89	60522.09	64991.6	64025.92	6583.31	91523.52	26571.75	424.65	11040.25	29534.26	27904.89	26940.49	26892.55	10536.85	26363.39	18141.43	28253.19	28898.73	28776.85
MW9449	TG(i-22:0/i-15:0/15:0)	C55H106O6	488.1588	470.1247	0.6322	2.157	1	--	HMDB0068375	--	--	1.0	-	-	10606.37	14099.65	66477.13	34036.91	6804.4	16244.68	6658.89	15080.82	20972.47	7675.1	12300.69	55667.21	25192.68	13291.32	13478.93	15693.33	16797.56	20703.15	15119.11	43037.82	22815.95	23483.03	23500.56
MW9448	TG(i-22:0/i-13:0/21:0)	C59H114O6	581.0467	504.1268	0.607	2.1753	1	--	HMDB0067860	--	--	1.0	-	-	44176.44	35918.9	31225.72	22698.69	14359.67	30464.28	7963.76	14662.67	37786.05	10747.86	15386.34	17797.22	1034.41	15579.31	9073.96	28596.9	26061.96	56699.31	45047.18	7875.83	39514.02	39598.44	38482.56
MW9447	TG(i-22:0/a-25:0/i-24:0)[rac]	C74H144O6	594.1675	288.0668	0.6475	4.0655	1	--	HMDB0069398	--	--	1.0	-	-	22631.64	5334.66	13923.18	10381.47	1249.88	2645.41	3854.44	879.83	5325.9	6850.93	19483.26	23815.89	17373.99	25139.4	28258.48	25234.01	32360.74	29057.65	20528.42	30729.02	19467.26	19524.63	18367.1
MW2852	TG(i-22:0/a-13:0/i-13:0)[rac]	C51H98O6	767.133	384.0693	0.5789	2.3421	1	--	HMDB0067682	--	--	1.0	-	-	7418.58	3536.86	6030.01	7214.39	15757.98	2982.04	15166.25	4086.75	9403.05	4262.73	1601.69	2269.27	337.45	1962.82	1383.51	2515.44	1675.45	2017.65	2143.58	2688.82	6420.62	6266.44	6117.47
MW9445	TG(i-22:0/18:0/17:0)	C60H116O6	253.0705	288.0845	0.6415	1.5272	1	--	HMDB0069072	--	--	1.0	-	-	7226.46	3132.25	15229.88	12976.63	3391.41	19393.61	1760.49	16737.12	9945.97	19779.85	6350.13	533.81	5525.0	3579.51	4506.34	5458.51	4090.49	7487.63	8477.71	622.77	8380.51	8553.13	7846.52
MW2850	TG(i-22:0/17:0/20:0)	C62H120O6	700.2984	684.2782	0.6076	0.9349	1	--	HMDB0068059	--	--	1.0	-	-	22414.5	14261.97	11218.1	6692.09	10570.36	12155.11	12560.59	10345.57	5227.19	4823.81	5236.7	7023.4	4936.45	6577.74	6438.94	6759.76	6858.17	4444.14	5595.37	2292.81	8139.87	8174.24	8361.35
MW2849	TG(i-22:0/16:0/i-21:0)	C62H120O6	685.263	666.2676	0.5027	8.9141	1	--	HMDB0067940	--	--	1.0	-	-	277770.75	157559.19	98131.88	116847.52	98730.27	167953.85	95354.61	130773.94	37417.64	115674.86	88374.28	141163.74	146709.4	227339.69	88925.31	118858.72	133959.63	104091.43	154337.89	204009.17	145351.77	150173.53	159067.62
MW9444	TG(i-22:0/16:0/i-18:0)	C59H114O6	745.186	678.2312	0.5898	1.0405	1	--	HMDB0068754	--	--	1.0	-	-	10040.01	136994.05	26829.0	39292.4	107728.72	51690.86	103068.72	46477.01	23115.58	71758.75	25961.11	39610.05	9568.66	21056.0	27958.58	19343.04	18259.68	9780.29	13141.99	101751.52	33891.31	34045.81	33333.04
MW2848	TG(i-22:0/15:0/i-15:0)	C55H106O6	298.0475	317.0656	0.6383	11.5103	1	--	HMDB0068686	--	--	1.0	-	-	281.29	138.57	134.09	13.35	78.72	454.12	194.12	13.41	12.83	71.74	192.81	30.18	182.3	98.7	36.31	55.48	569.34	73.85	81.66	55.8	2292.73	2240.6	2365.72
MW9443	TG(i-22:0/15:0/21:0)	C61H118O6	549.1425	502.1298	0.6456	6.4542	1	--	HMDB0067885	--	--	1.0	-	-	10307.4	8392.59	8909.61	9847.08	9716.44	9346.29	9582.5	9549.84	8436.73	7984.33	389.07	138.28	391.24	668.89	426.52	523.07	328.28	1457.85	3111.63	217.6	14043.61	13266.55	12914.87
MW9442	TG(i-22:0/13:0/a-21:0)[rac]	C59H114O6	539.0282	258.0198	0.6091	4.0597	1	--	HMDB0068884	--	--	1.0	-	-	47203.8	9369.16	24534.35	6529.28	2484.01	3907.0	2215.81	1790.82	11312.31	9961.68	47745.92	53381.05	25151.05	54847.98	51021.64	50613.03	63319.82	52915.56	57450.61	81197.43	33831.06	34416.83	34737.51
MW9441	TG(i-22:0/13:0/16:0)	C54H104O6	659.0032	694.0112	0.6654	1.1106	1	--	HMDB0067782	--	--	1.0	-	-	27826.58	16099.2	45587.06	34187.03	15976.48	55714.05	16507.57	32907.61	38525.07	86683.67	166125.42	98488.85	33850.68	165945.82	133125.39	174250.48	177491.76	276873.42	262583.61	44338.3	63642.14	64577.35	67522.72
MW9439	TG(i-21:0/i-22:0/i-12:0)	C58H112O6	587.0511	472.1733	0.5126	4.0687	1	--	HMDB0067265	--	--	1.0	-	-	12446.94	5043.16	8195.44	4325.25	1871.76	1966.5	1660.64	2405.96	2573.82	5660.47	24258.03	14339.58	2232.78	23503.01	19429.77	24439.36	32800.53	27416.41	21797.05	12233.23	13689.25	14100.52	13431.24
MW9438	TG(i-21:0/i-22:0/13:0)	C59H114O6	445.1205	406.1569	0.6236	12.6256	1	--	HMDB0067432	--	--	1.0	-	-	384369.85	464326.47	73570.86	344126.53	643809.05	1148634.22	1049640.58	1026654.23	309163.21	184421.67	406281.16	185594.19	191939.03	205460.07	468188.06	379961.16	248517.14	193607.74	160088.22	69869.28	1043997.51	1057558.99	977177.16
MW9437	TG(i-21:0/i-21:0/i-15:0)	C60H116O6	738.1805	755.1844	0.6246	0.7807	1	--	HMDB0064892	--	--	1.0	-	-	1307.88	36896.29	13542.44	31427.86	36177.8	20408.35	36180.81	19623.75	7055.22	14777.55	2652.9	7219.15	12573.69	1777.38	4018.36	1313.17	2363.87	4654.62	1016.16	4132.59	10026.51	10157.84	9549.38
MW9436	TG(i-21:0/i-21:0/10:0)	C55H106O6	956.5128	911.5395	0.585	4.2939	1	--	HMDB0065913	--	--	1.0	-	-	406812.55	345470.22	280619.64	324430.49	118157.73	156773.21	103877.15	139288.6	53674.58	100610.17	1898.34	74693.36	74583.76	808.3	26648.65	31499.73	38757.03	72304.29	82006.29	34719.47	44699.44	45358.05	41304.77
MW2845	TG(i-21:0/i-20:0/i-16:0)	C60H116O6	371.0774	390.0951	0.6346	4.8371	1	--	HMDB0067540	--	--	1.0	-	-	597.42	1645.07	405.65	1088.19	1244.05	568.55	2062.98	773.51	768.75	408.26	32313.13	27789.01	9693.93	43832.58	50152.63	39640.73	24288.35	8261.99	13914.63	27160.46	19434.17	20438.59	20062.78
MW9435	TG(i-21:0/i-20:0/a-17:0)[rac]	C61H118O6	661.044	622.0781	0.5291	4.5756	1	--	HMDB0067497	--	--	1.0	-	-	700.06	20854.49	53683.7	9379.38	5606.68	6977.8	4481.63	5994.73	33462.22	24759.42	170.88	1655.08	13923.58	3165.46	115.52	291.22	212.01	3559.43	5221.05	158.02	20349.07	20333.45	20011.9
MW2843	TG(i-21:0/i-20:0/a-13:0)[rac]	C57H110O6	567.0665	546.0891	0.5117	4.6179	1	--	HMDB0066548	--	--	1.0	-	-	2609.31	11749.37	9484.63	10776.18	11395.43	10534.08	10314.37	10783.93	9103.99	13292.9	3008.88	1108.97	733.05	3669.86	5268.4	3855.53	2422.16	3978.93	3457.21	2157.3	6802.36	6215.46	6808.61
MW9434	TG(i-21:0/i-19:0/i-17:0)	C60H116O6	1079.206	520.1217	0.6328	4.9254	1	--	HMDB0066864	--	--	1.0	-	-	107743.34	5607.22	59555.94	56565.39	39746.31	59151.77	51810.9	58657.79	110483.97	60955.38	2203.18	4495.15	4947.55	2641.3	3130.48	2122.72	877.07	1959.65	5549.39	4944.3	4951.45	4685.42	4586.02
MW9433	TG(i-21:0/i-19:0/19:0)	C62H120O6	449.1274	466.1323	0.546	0.811	1	--	HMDB0066494	--	--	1.0	-	-	50881.62	7546.94	66728.21	37193.52	31779.58	40717.16	16493.73	39873.58	71578.84	36905.77	33682.76	46265.93	6235.44	41892.85	39567.96	43676.39	45722.55	61786.7	61860.3	27346.21	56695.92	56695.64	56492.65
MW2842	TG(i-21:0/i-17:0/i-22:0)	C63H122O6	816.136	800.1258	0.6212	2.2008	1	--	HMDB0067480	--	--	1.0	-	-	927276.19	509457.49	427813.01	620172.81	207380.24	284623.12	234248.89	279252.93	260924.66	638994.64	484508.83	1165252.27	273078.54	426422.21	664374.45	456081.73	1096054.21	361163.56	335032.9	358281.22	611236.91	692490.41	666117.4
MW9432	TG(i-21:0/i-17:0/i-19:0)	C60H116O6	851.0391	414.0257	0.5943	5.0631	1	--	HMDB0067066	--	--	1.0	-	-	144.22	105.66	70.51	89.98	180.22	295.82	260.83	262.6	84.66	37.0	135.82	197.8	306.63	133.37	119.27	349.87	172.97	443.04	261.61	113.99	1980.52	1954.69	1981.74
MW2841	TG(i-21:0/i-16:0/i-14:0)	C54H104O6	408.9987	372.0515	0.549	1.4422	1	--	HMDB0066006	--	--	1.0	-	-	24657.94	1337.08	16271.7	3836.27	2016.93	8285.9	1617.32	1671.55	26222.4	481.33	24324.3	18866.71	53100.94	41331.91	25529.06	50216.15	54137.09	207898.92	135456.97	7988.05	25200.78	25982.68	26013.99
MW9430	TG(i-21:0/i-15:0/i-22:0)	C61H118O6	589.0606	544.0887	0.6164	4.1139	1	--	HMDB0066074	--	--	1.0	-	-	61691.52	192542.55	68714.96	210458.25	79392.67	80588.46	94011.53	86767.58	83529.41	38286.3	427.85	9300.32	16037.47	22311.44	20418.8	435.3	17101.15	59735.5	73248.47	2533.84	73426.2	73454.23	71573.66
MW2838	TG(i-21:0/i-15:0/20:0)	C59H114O6	839.13	802.1804	0.6124	1.2039	1	--	HMDB0065258	--	--	1.0	-	-	19687.3	6391.77	42039.3	11913.48	4050.7	20369.94	9322.33	24794.2	15943.62	32590.17	61670.97	33818.97	33054.16	51018.52	46472.91	51958.33	53920.2	63015.75	61131.01	16808.39	32743.91	34814.5	34513.93
MW2837	TG(i-21:0/i-14:0/18:0)	C56H108O6	405.0606	368.1107	0.5556	5.0115	1	--	HMDB0064686	--	--	1.0	-	-	3012.01	167.3	673.56	209.93	903.07	394.19	180.95	164.53	437.61	187.31	10442.99	7031.98	10055.0	10275.08	14234.77	10830.27	9343.84	1826.31	1661.42	9859.29	4061.67	4582.54	4090.5
MW2836	TG(i-21:0/i-13:0/17:0)	C54H104O6	978.4852	979.4963	0.5353	4.1617	1	--	HMDB0065961	--	--	1.0	-	-	84303.12	1981.54	2669.23	1002.1	3411.32	4926.58	988.46	994.17	409.75	1862.67	108717.39	70698.27	74621.22	124700.64	125964.2	135249.32	155511.15	113506.94	61768.38	71926.08	53674.5	54732.79	54704.76
MW2835	TG(i-21:0/a-25:0/a-13:0)[rac]	C62H120O6	457.1146	438.1162	0.8656	4.6191	1	--	HMDB0067246	--	--	1.0	-	-	133102.6	110251.61	167770.3	139743.15	101057.17	129864.91	95685.89	121943.27	92858.03	135601.09	79533.26	114713.59	78202.61	92822.04	70516.28	77172.0	81158.37	125079.43	113841.97	118595.11	115199.34	116777.47	115279.68
MW2834	TG(i-21:0/a-17:0/15:0)[rac]	C56H108O6	391.0206	354.074	0.5093	1.9256	1	--	HMDB0067144	--	--	1.0	-	-	30448.05	36134.71	39345.34	35995.2	51625.19	32709.17	48192.67	32069.6	43939.51	4730.5	42280.32	30406.01	34071.31	52537.3	58462.05	59690.6	54629.83	19114.89	32216.19	34228.95	38501.47	39787.77	39997.42
MW9429	TG(i-21:0/a-13:0/i-22:0)[rac]	C59H114O6	420.0423	402.0079	0.6173	1.4696	1	--	HMDB0066087	--	--	1.0	-	-	10092.94	35364.82	22715.5	20838.55	29606.01	34683.93	31290.88	30613.04	19072.37	11409.18	25315.32	24879.59	6368.12	21761.65	18394.95	17621.18	21457.23	14762.48	14517.0	19821.76	23271.41	23370.09	23286.7
MW9428	TG(i-21:0/a-13:0/a-21:0)[rac]	C58H112O6	297.0826	592.1428	0.5467	12.9596	1	--	HMDB0065391	--	--	1.0	-	-	55085.08	55046.09	52311.44	56794.24	244892.0	188752.87	162059.83	192310.82	39662.03	26216.78	50392.63	22747.63	23764.47	33677.46	169733.59	41113.4	35278.89	25384.66	18909.1	7414.65	193106.08	185849.55	134854.92
MW2833	TG(i-21:0/a-13:0/8:0)[rac]	C45H86O6	681.1089	644.1589	0.584	1.3285	1	--	HMDB0064957	--	--	1.0	-	-	6362.42	28238.24	44976.0	37478.02	35561.02	27956.84	30212.9	30641.08	18285.47	63994.85	16066.15	14879.4	21443.69	17199.82	18137.22	13457.75	13714.57	10798.41	11109.03	12342.4	17990.8	18344.12	18056.95
MW9425	TG(i-21:0/a-13:0/18:0)[rac]	C55H106O6	1095.2144	528.1268	0.5832	5.1942	1	--	HMDB0065666	--	--	1.0	-	-	461.86	2586.68	899.92	89247.85	182522.25	119998.57	173240.35	134626.1	903.34	503520.02	27148.85	64964.26	7017.95	32582.56	48349.21	34892.88	29497.27	51928.34	52984.33	41461.28	55551.1	54421.69	54322.79
MW9424	TG(i-21:0/8:0/i-24:0)	C56H108O6	721.0303	606.1585	0.5203	4.058	1	--	HMDB0065435	--	--	1.0	-	-	80623.35	21907.24	56953.74	19028.5	4649.37	4331.97	13619.14	6274.09	20539.46	23959.96	78349.62	85359.19	895.08	80979.67	92122.71	95615.69	87279.86	96722.63	86234.37	108123.13	65778.09	64226.14	65701.29
MW2832	TG(i-21:0/8:0/a-25:0)[rac]	C57H110O6	919.0468	976.1029	0.9732	2.3172	1	--	HMDB0064908	--	--	1.0	-	-	42337.0	47953.1	57818.04	62992.21	66658.19	50066.05	75909.19	54214.4	61837.97	70616.65	44811.48	47013.06	10461.24	36628.51	38218.14	46815.62	36982.95	49939.72	49980.76	37332.8	69426.3	68621.33	68585.54
MW2829	TG(i-21:0/21:0/a-21:0)[rac]	C66H128O6	481.0779	500.0955	0.8774	2.3255	1	--	HMDB0067136	--	--	1.0	-	-	119131.04	75938.38	110461.43	108950.43	181625.36	84577.81	186282.58	89097.96	138246.44	101113.0	87182.32	99929.46	30110.88	62408.89	66360.68	72084.59	67328.81	82881.77	78640.3	62816.27	123859.82	125076.78	123394.36
MW2828	TG(i-21:0/20:0/i-18:0)	C62H120O6	600.2031	619.22	0.5975	8.856	1	--	HMDB0067287	--	--	1.0	-	-	250191.43	1264.68	1037.84	4730.03	3659.45	3724.3	1919.32	3304.84	32043.13	583.92	10095.36	16159.34	35046.21	15163.85	12409.08	23431.66	23122.54	19564.7	8209.77	21164.79	15059.11	15397.16	15261.89
MW2827	TG(i-21:0/20:0/i-13:0)	C57H110O6	839.2068	420.1056	0.5485	1.5891	1	--	HMDB0066783	--	--	1.0	-	-	11974.88	20455.06	20097.36	22254.44	24031.98	26498.45	21507.21	25789.04	32570.73	31319.39	45281.47	26703.58	46310.84	35711.23	44400.56	33566.61	34234.68	35175.9	23065.3	25372.89	29680.93	29358.49	29344.86
MW9422	TG(i-21:0/19:0/i-19:0)	C62H120O6	555.0505	488.0955	0.5541	1.9013	1	--	HMDB0066736	--	--	1.0	-	-	5310.48	8259.38	1878.65	17587.76	3302.75	9120.86	2376.14	10499.33	8011.44	3023.66	30143.0	10617.49	12052.99	29664.33	27262.66	29949.89	29545.47	18331.03	12883.57	20894.9	12848.08	13657.79	13337.56
MW9421	TG(i-21:0/19:0/i-15:0)	C58H112O6	771.1507	366.0951	0.547	4.9163	1	--	HMDB0067039	--	--	1.0	-	-	260336.45	13050.14	162165.05	193551.25	121977.91	203891.01	137597.1	183568.38	308092.35	178524.71	2206.58	2086.31	1759.87	2995.86	7550.45	1297.94	2113.62	999.42	2189.61	1460.01	38492.86	37330.14	36993.17
MW2825	TG(i-21:0/18:0/i-16:0)	C58H112O6	480.1071	461.1084	0.6352	4.3605	1	--	HMDB0066413	--	--	1.0	-	-	6903.37	11816.84	13654.39	11368.55	14184.1	11445.59	6694.52	13239.99	14888.6	9363.06	2698.06	3716.54	6533.62	3478.27	5719.49	4388.01	2987.2	8421.57	6624.44	5473.84	9838.92	9743.34	9764.01
MW9420	TG(i-21:0/18:0/12:0)	C54H104O6	576.99	554.0003	0.6238	4.778	1	--	HMDB0066591	--	--	1.0	-	-	944545.52	265305.09	1194984.47	691375.63	526643.91	535646.18	485094.7	432648.55	1194069.19	538648.81	36999.08	37058.47	76365.2	38200.21	23319.94	39823.63	41995.85	299201.37	186852.46	32465.72	181750.7	180220.0	179991.07
MW9419	TG(i-21:0/17:0/i-19:0)	C60H116O6	564.9771	488.0591	0.5903	4.7842	1	--	HMDB0066594	--	--	1.0	-	-	180745.05	51057.68	193876.38	141088.15	151403.58	151619.71	153002.26	135332.68	216359.39	167327.53	5354.88	9027.69	62059.45	3645.98	4812.46	1384.5	2520.46	12872.42	9417.82	7579.86	42755.38	42170.12	41691.19
MW9418	TG(i-21:0/16:0/i-12:0)	C52H100O6	522.0153	483.0597	0.5567	4.2869	1	--	HMDB0066195	--	--	1.0	-	-	178168.81	127382.32	85856.54	128471.34	44323.39	40620.61	54477.84	61898.49	9438.95	39501.16	3604.87	4983.87	3335.63	14075.71	9445.63	12854.05	1165.65	11341.28	19768.58	6049.26	6595.53	6237.73	6563.19
MW9417	TG(i-21:0/14:0/i-17:0)	C55H106O6	568.0284	529.0652	0.6481	5.0547	1	--	HMDB0066205	--	--	1.0	-	-	171.75	53.36	26.55	108.47	30.12	63.67	39.89	23.35	144.37	140.73	71.46	40.58	49.04	106.85	79.81	48.43	297.59	100.74	94.24	28.29	1004.77	1009.94	993.78
MW9416	TG(i-21:0/14:0/15:0)	C53H102O6	528.024	464.0083	0.6435	4.0696	1	--	HMDB0066094	--	--	1.0	-	-	1192.75	236.76	627.33	200.73	378.47	197.42	479.59	142.58	1840.49	273.34	8699.11	14166.21	2380.8	13265.8	10871.4	7567.19	13627.07	8394.99	5399.82	16902.83	6062.51	6162.03	5341.27
MW9415	TG(i-21:0/13:0/i-24:0)	C61H118O6	584.2226	584.2226	0.6252	4.7832	1	--	HMDB0065871	--	--	1.0	-	-	764372.05	267966.15	482363.48	377511.44	520465.99	463334.35	592056.69	375711.79	669233.06	497262.67	51221.16	17637.09	3168.42	37208.18	28526.41	63961.52	58220.9	347271.57	220910.82	6880.9	195114.09	186724.28	193397.11
MW2819	TG(i-21:0/12:0/i-18:0)	C54H104O6	262.988	263.994	0.5513	12.5093	1	--	HMDB0066296	--	--	1.0	-	-	1290997.26	696943.36	674669.04	595854.44	617359.11	694072.53	697891.12	738891.71	657398.32	840731.14	921950.55	878840.87	759363.16	770687.18	215597.76	585157.0	789240.62	410082.52	903189.96	791458.62	672927.7	668134.01	657487.4
MW2818	TG(i-21:0/10:0/16:0)	C50H96O6	555.192	278.1002	0.5905	4.8125	1	--	HMDB0064814	--	--	1.0	-	-	14798.8	8300.76	13352.74	11111.22	12540.68	42616.83	10792.03	37064.9	26362.32	23216.45	15385.29	17615.15	1361.67	16255.49	16982.81	15819.97	17813.09	15739.18	16092.45	8154.31	22190.02	22582.03	22560.35
MW9414	TG(i-21:0/10:0/13:0)	C47H90O6	297.0695	516.2148	0.5959	1.0539	1	--	HMDB0064716	--	--	1.0	-	-	1509596.41	2565726.59	1675749.88	2046412.92	2550618.39	1841345.43	2629086.91	1998631.13	1943329.98	934094.51	683925.48	1194153.31	724725.38	693323.89	652388.04	689553.56	456084.02	621028.74	573075.56	1129647.5	1518851.56	1504860.17	1493603.66
MW2816	TG(i-20:0/i-20:0/22:0)	C65H126O6	641.1521	622.1534	0.64	1.3285	1	--	HMDB0065378	--	--	1.0	-	-	25587.83	52417.96	51992.06	84244.64	48324.69	44948.86	52491.22	43083.81	50910.88	64234.09	35097.3	45455.64	64085.16	38077.55	49844.1	33651.53	35707.31	35344.29	33136.42	78683.53	46494.82	47162.09	47132.23
MW2815	TG(i-20:0/i-20:0/16:0)	C59H114O6	221.0666	222.074	0.6438	0.8632	1	--	HMDB0063470	--	--	1.0	-	-	114259.79	101834.28	152249.57	117841.22	60590.75	123608.95	50369.2	73284.28	67773.63	104786.13	102858.34	94746.03	111063.62	102649.7	96278.46	96468.62	66191.18	118653.19	108880.26	75714.01	98400.81	100649.77	95500.55
MW9412	TG(i-20:0/i-19:0/i-13:0)	C55H106O6	518.1496	476.1166	0.6031	4.0671	1	--	HMDB0063449	--	--	1.0	-	-	2975.48	368.56	1852.14	3814.93	2132.65	828.42	761.9	1413.84	643.29	416.06	8434.97	8118.95	14346.05	12686.39	7875.96	13773.65	8908.63	53848.13	38992.5	9088.8	11012.47	10920.61	10380.6
MW2813	TG(i-20:0/i-18:0/i-12:0)	C53H102O6	409.0383	388.0642	0.6085	1.0875	1	--	HMDB0063545	--	--	1.0	-	-	7441.68	38489.81	67019.06	69452.41	16988.15	88408.88	16676.88	86082.35	31015.54	121134.75	48190.23	13264.49	176281.02	48062.82	49581.44	50609.99	40689.09	51547.29	51728.67	5586.0	49264.86	48519.41	50341.74
MW9411	TG(i-20:0/i-17:0/a-13:0)	C53H102O6	1030.3175	506.1424	0.6123	13.1245	1	--	HMDB0063127	--	--	1.0	-	-	1635482.88	1296372.49	1315844.14	452204.75	252763.91	245621.69	231197.35	243466.11	299591.57	287348.03	259253.17	286217.92	295430.53	419005.49	203145.85	260279.15	531402.72	267490.27	201819.32	111517.61	201635.2	213005.34	184777.96
MW9409	TG(i-20:0/i-14:0/i-18:0)	C55H106O6	409.0224	426.0257	0.8988	2.1868	1	--	HMDB0064316	--	--	1.0	-	-	816161.87	706292.25	749107.06	668916.36	347046.92	470623.21	348185.38	516072.74	532693.01	678534.27	580630.5	566036.06	209662.52	536034.41	511661.82	526553.57	611143.99	637497.65	657126.68	406072.96	692668.46	699961.89	651303.94
MW9408	TG(i-20:0/i-14:0/a-17:0)	C54H104O6	1033.3157	1032.2993	0.5481	13.1895	1	--	HMDB0064004	--	--	1.0	-	-	144914.19	119424.38	33006.07	73694.64	31158.43	45377.27	22533.87	24708.61	81071.33	26910.42	19266.04	28511.63	32283.15	38590.82	24690.54	28027.99	35826.28	31417.64	24068.16	7049.21	18085.42	19846.72	15714.45
MW9407	TG(i-20:0/i-14:0/a-15:0)	C52H100O6	939.091	450.0621	0.5352	1.1116	1	--	HMDB0064283	--	--	1.0	-	-	23318.51	6823.28	33446.69	11003.2	4006.45	11345.26	5597.24	10237.47	42099.47	15416.63	32673.66	17442.6	3393.46	30856.35	31886.18	35202.86	46346.28	24018.29	28227.19	14181.48	32171.19	29349.23	30443.23
MW2807	TG(i-20:0/i-13:0/i-13:0)	C49H94O6	437.1068	416.1319	0.6358	4.6167	1	--	HMDB0064086	--	--	1.0	-	-	18536.23	32169.12	25479.76	40838.46	32775.24	23811.57	37729.3	33165.74	31804.2	41471.08	10792.14	10130.6	6221.77	9181.83	19749.31	21007.65	13375.71	15660.27	20884.75	23397.39	27903.35	28088.35	28368.14
MW9405	TG(i-20:0/i-13:0/8:0)	C44H84O6	448.9806	334.1053	0.6287	4.2358	1	--	HMDB0063275	--	--	1.0	-	-	3013.69	50766.48	35784.88	11399.68	59405.72	18685.5	30208.47	34920.93	22725.75	14940.75	9231.49	8470.93	15778.16	9919.24	9739.69	8576.29	8019.33	1470.1	558.44	11179.83	9440.6	9642.61	9640.62
MW9404	TG(i-20:0/i-13:0/18:0)	C54H104O6	721.1203	698.133	0.5658	4.7858	1	--	HMDB0063492	--	--	1.0	-	-	1226479.47	467300.96	1224809.99	907798.17	556039.62	720826.22	603121.95	784001.88	1666138.82	1039769.34	33668.48	77283.49	188562.28	4269.28	3602.5	2156.92	3307.43	115746.61	97554.44	45647.15	273837.5	275877.6	275923.59
MW2804	TG(i-20:0/i-12:0/i-12:0)	C47H90O6	808.1458	787.1716	0.6312	1.6109	1	--	HMDB0063456	--	--	1.0	-	-	3630.19	18853.79	83926.52	50724.89	6011.41	20979.8	11040.6	32446.28	21548.99	14618.1	6939.49	23806.34	21185.94	8224.41	8276.69	11865.04	8442.37	11193.09	12560.64	15402.97	21852.53	21903.68	21227.06
MW2803	TG(i-20:0/i-12:0/a-15:0)	C50H96O6	767.2078	768.2113	0.506	4.2176	1	--	HMDB0063199	--	--	1.0	-	-	20948.63	45224.83	17910.53	23242.94	23410.56	19293.5	26702.83	19646.23	16741.79	13393.89	18784.28	3281.56	1296.84	13794.25	17272.47	13893.13	20009.35	14660.4	16626.63	2801.7	17175.91	17244.45	16599.75
MW9403	TG(i-20:0/a-25:0/18:0)[rac]	C66H128O6	672.9823	558.1043	0.5217	4.6266	1	--	HMDB0066160	--	--	1.0	-	-	909896.22	163548.37	128889.74	135988.56	210617.57	54497.49	282547.63	43374.13	1009610.57	133259.14	5370.17	4296.6	3579.78	5062.63	15950.44	14685.47	1051.44	4378.55	4591.71	1732.35	6250.46	5762.15	4931.82
MW2802	TG(i-20:0/a-25:0/13:0)[rac]	C61H118O6	707.0762	354.0409	0.581	11.5895	1	--	HMDB0066011	--	--	1.0	-	-	19513.12	17000.64	19746.32	20044.31	18248.99	20486.49	17951.16	19883.26	18290.05	19956.46	8270.48	9794.77	12325.36	78.45	7034.41	6757.57	7040.22	15301.54	13392.43	106.3	27929.2	28320.88	28303.57
MW2801	TG(i-20:0/a-21:0/a-17:0)[rac]	C61H118O6	751.1811	770.1906	0.8084	1.6024	1	--	HMDB0065232	--	--	1.0	-	-	41201.89	104998.68	234476.13	143460.2	50434.99	111197.2	31816.33	70153.88	87386.6	28463.65	32421.43	101725.27	20064.44	45244.72	21330.75	41503.71	54438.17	86575.63	74572.65	76509.1	99362.65	96556.3	97776.52
MW9402	TG(i-20:0/a-17:0/i-21:0)	C61H118O6	686.1154	686.1153	0.8735	1.1112	1	--	HMDB0063623	--	--	1.0	-	-	30169.96	39279.82	74524.97	45155.0	17757.84	20595.51	3568.08	21877.0	24842.68	30552.87	29846.17	75971.14	27620.05	29295.61	74041.95	29540.7	78188.32	33188.04	32799.58	65319.4	69582.94	70013.92	70330.14
MW2798	TG(i-20:0/8:0/10:0)	C41H78O6	554.0646	533.0926	0.5125	1.0626	1	--	HMDB0063025	--	--	1.0	-	-	23699.14	36719.48	38947.15	38485.24	43571.5	30991.87	39873.84	33522.27	26524.9	43234.08	33349.09	28630.31	58905.35	30474.67	32732.89	32384.94	33194.99	48420.34	42434.17	21353.89	48663.93	50098.06	46862.75
MW9401	TG(i-20:0/22:0/i-16:0)	C61H118O6	691.1223	624.169	0.6493	4.3516	1	--	HMDB0065231	--	--	1.0	-	-	240823.41	84835.72	32216.85	67278.28	15975.27	90883.5	19039.94	79682.52	28570.47	71943.9	1684.28	14598.66	27580.84	10440.86	1455.18	1874.61	648.13	43984.84	51935.77	12190.15	18956.5	19877.48	16302.53
MW2797	TG(i-20:0/22:0/a-21:0)[rac]	C66H128O6	505.2741	524.292	0.6483	4.6103	1	--	HMDB0065794	--	--	1.0	-	-	24504.83	7721.37	11447.62	2984.45	19134.25	5622.35	13716.15	2206.96	16984.05	5000.69	59343.75	7385.35	13181.34	59600.3	58594.86	60342.17	62661.29	71755.49	67653.12	15436.58	29285.19	29538.51	30587.05
MW9399	TG(i-20:0/22:0/14:0)	C59H114O6	484.9541	418.0028	0.5258	1.116	1	--	HMDB0066078	--	--	1.0	-	-	16804.28	26805.36	61615.47	24553.89	16358.79	36367.72	23842.49	49710.98	47500.41	62891.25	29899.62	17789.58	21180.74	74563.3	69956.33	30412.49	75283.01	100983.97	114142.42	15434.24	46288.87	45581.13	41690.87
MW2796	TG(i-20:0/21:0/12:0)	C56H108O6	245.0427	224.0685	0.6134	1.5819	1	--	HMDB0065758	--	--	1.0	-	-	95932.96	140111.63	53913.72	115277.97	83792.18	71427.8	138140.52	64398.36	73499.24	63204.9	21322.92	210465.51	21549.9	24355.89	14523.3	23425.39	16472.71	9806.75	16003.84	94435.56	46612.1	47358.51	49310.43
MW2795	TG(i-20:0/20:0/a-13:0)	C56H108O6	712.1603	731.1818	0.5068	1.7937	1	--	HMDB0063447	--	--	1.0	-	-	200425.32	192286.33	676923.32	829040.44	310839.78	590499.33	320403.98	629069.86	260283.39	737034.8	181851.69	118552.54	534693.68	174364.32	215380.55	198214.47	210961.23	347130.31	310083.45	98737.99	328001.3	319666.88	326745.46
MW9397	TG(i-20:0/19:0/i-21:0)	C63H122O6	254.9717	216.0092	0.5907	1.1201	1	--	HMDB0063246	--	--	1.0	-	-	117659.45	56394.26	150228.03	45785.83	38507.72	122961.66	59933.98	54979.58	64403.06	140539.35	78010.33	31954.54	30798.65	113593.09	179396.96	113355.93	119437.96	74170.86	171415.79	47657.35	122299.94	116258.08	123202.32
MW2792	TG(i-20:0/19:0/i-17:0)	C59H114O6	810.1403	773.1924	0.6252	1.6121	1	--	HMDB0063464	--	--	1.0	-	-	7874.19	11959.8	18715.8	8979.06	27442.02	11941.97	54890.49	14119.64	24207.02	45933.28	31354.15	24716.25	9933.68	29084.39	29474.39	26993.11	22815.6	28578.58	21936.18	22571.97	21010.57	21395.46	21418.17
MW9396	TG(i-20:0/19:0/20:0)	C62H120O6	594.1584	530.1424	0.6424	12.9689	1	--	HMDB0064265	--	--	1.0	-	-	51992.08	58587.4	35998.83	113696.46	54904.01	99420.1	89392.97	45749.8	32025.0	26761.92	19995.17	19006.33	42750.93	60944.73	12822.29	39911.55	31727.44	15562.98	17239.93	7212.51	189052.13	179470.87	164627.48
MW9394	TG(i-20:0/17:0/i-17:0)	C57H110O6	644.1206	621.1265	0.5225	4.2939	1	--	HMDB0064413	--	--	1.0	-	-	176714.77	188892.79	112899.02	157616.14	74280.5	84783.6	26413.18	27722.51	11809.76	26186.83	11030.97	2082.8	673.07	6042.96	6672.93	778.7	844.85	5332.29	9071.29	3345.37	5697.41	5442.21	5736.49
MW9393	TG(i-20:0/17:0/10:0)	C50H96O6	721.1972	756.2113	0.6433	4.0563	1	--	HMDB0063037	--	--	1.0	-	-	52125.11	14643.75	24456.1	12188.96	512.19	1765.44	3181.5	1950.84	5683.48	13986.22	76293.49	68027.54	1289.11	54181.52	46342.89	68795.05	47050.89	52423.46	27436.49	56494.34	39295.27	39588.22	38719.71
MW9392	TG(i-20:0/16:0/a-13:0)	C52H100O6	591.1084	546.1373	0.6375	0.9609	1	--	HMDB0064280	--	--	1.0	-	-	29991.76	27836.46	76302.04	47852.34	16414.23	96167.01	17530.21	141262.54	51114.19	185242.29	68207.26	10557.36	184987.77	66241.81	70972.49	50046.15	62315.98	95739.35	95289.6	4911.65	61154.19	59604.21	61361.65
MW9391	TG(i-20:0/15:0/i-21:0)	C59H114O6	270.9676	232.0042	0.627	1.5683	1	--	HMDB0063431	--	--	1.0	-	-	27483.21	22095.47	66284.34	78717.69	63612.94	118954.28	69398.83	114796.27	98069.35	89909.15	48644.09	14892.31	90277.08	40196.92	33020.51	24565.24	30477.08	28179.93	41398.67	9070.97	36310.41	36435.81	34151.11
MW2787	TG(i-20:0/15:0/i-17:0)	C55H106O6	423.0929	404.093	0.577	4.2191	1	--	HMDB0064164	--	--	1.0	-	-	111523.5	218363.11	134743.93	130634.32	156740.18	141954.33	154064.49	143959.08	108696.91	119849.95	102663.46	60881.24	16706.16	120703.83	131198.51	114295.55	111857.88	102465.59	121859.61	50235.61	110312.06	108993.23	109049.98
MW2786	TG(i-20:0/15:0/a-17:0)	C55H106O6	308.0083	291.9889	0.6407	6.5131	1	--	HMDB0063548	--	--	1.0	-	-	83112.75	71417.99	173551.25	78291.93	57234.11	193141.48	61424.83	197646.96	143624.54	238342.58	79716.27	379115.62	34310.96	107588.01	106413.01	126622.98	104630.77	79732.23	79343.32	110296.46	137447.35	136251.43	136011.5
MW2785	TG(i-20:0/14:0/i-16:0)	C53H102O6	327.1404	308.1412	0.6265	0.819	1	--	HMDB0064124	--	--	1.0	-	-	320242.9	1741018.29	319583.99	333151.99	1259059.42	448859.02	1287753.45	492215.26	316420.55	240521.96	137816.39	357598.3	57788.03	126612.24	136736.71	121375.59	126096.2	125412.95	136451.7	355813.82	295811.59	296010.7	298523.87
MW9390	TG(i-20:0/14:0/a-15:0)	C52H100O6	743.0589	666.1432	0.5153	1.1106	1	--	HMDB0063643	--	--	1.0	-	-	22314.1	11793.7	28801.19	20484.64	9292.34	26703.34	19438.56	25147.27	61055.99	21872.35	29611.75	31004.24	3703.52	30138.77	30177.09	28946.96	31455.25	36128.89	30249.4	14938.22	27092.31	27243.37	26784.4
MW9388	TG(i-20:0/13:0/i-24:0)	C60H116O6	292.0248	292.0253	0.649	1.3465	1	--	HMDB0063222	--	--	1.0	-	-	23845.44	9752.67	11952.0	7797.15	7445.49	478.71	256.42	7711.85	9449.08	11525.63	84943.21	353.68	8257.57	91420.57	84589.81	85376.13	91826.77	4667.11	7064.14	2059.53	10555.24	11100.55	11104.12
MW2782	TG(i-20:0/13:0/21:0)	C57H110O6	567.1485	546.1737	0.6474	6.6127	1	--	HMDB0063062	--	--	1.0	-	-	93968.08	4478.18	70773.11	81847.47	79076.54	82125.15	3362.17	121234.04	96255.09	101511.33	43619.29	456.2	46242.87	58412.55	40281.87	43034.32	48243.48	120630.02	107434.14	850.96	86762.57	86775.78	86197.92
MW9385	TG(i-20:0/13:0/19:0)	C55H106O6	1087.3027	532.1581	0.573	5.1976	1	--	HMDB0064232	--	--	1.0	-	-	450427.24	461462.38	159354.34	835614.88	370563.35	451054.3	362070.73	149734.91	944249.28	124556.67	87792.48	113163.12	54108.77	70681.21	110850.28	77339.7	66232.7	93696.1	127238.7	78279.06	176974.41	171774.4	176531.58
MW9384	TG(i-19:0/i-24:0/17:0)	C63H122O6	232.8904	155.9729	0.537	13.2759	1	--	HMDB0063208	--	--	1.0	-	-	104649.46	114478.48	110054.76	115531.8	119705.76	121642.6	118491.08	121399.05	124081.12	112662.05	107446.1	106902.31	102927.03	101005.03	112175.01	102480.75	102393.37	86866.49	93411.32	90495.43	114241.77	114286.97	113078.49
MW2780	TG(i-19:0/i-22:0/a-25:0)	C69H134O6	862.234	846.216	0.6027	1.5112	1	--	HMDB0064210	--	--	1.0	-	-	13277.46	12832.81	6790.4	17415.3	12192.36	13801.7	7019.55	4625.61	12734.24	1715.73	3897.19	5586.34	205.92	1690.35	3253.44	3699.09	3116.41	4096.41	11382.67	2415.09	9899.55	9923.45	10131.37
MW9382	TG(i-19:0/i-21:0/i-21:0)	C64H124O6	965.2065	463.1235	0.5365	0.998	1	--	HMDB0063381	--	--	1.0	-	-	11840.52	8220.11	15091.31	6093.98	3631.04	3856.7	4921.91	2963.82	13408.42	7714.35	12262.69	20714.08	886.8	12827.18	10336.19	12576.02	10716.23	10782.16	9893.14	19973.43	21352.16	20908.84	20511.38
MW2778	TG(i-19:0/i-21:0/21:0)	C64H124O6	517.1386	518.1483	0.5135	2.7622	1	--	HMDB0063885	--	--	1.0	-	-	22739.88	19808.26	14200.2	10305.4	19559.99	10066.46	19345.27	12502.68	16350.87	9032.02	3595.59	30185.84	4348.33	3552.15	2690.17	2391.01	4178.25	1387.52	1683.25	21078.41	13410.79	12974.64	13341.42
MW9381	TG(i-19:0/i-21:0/14:0)	C57H110O6	755.1419	358.09	0.5972	5.04	1	--	HMDB0063247	--	--	1.0	-	-	4113.79	4074.01	1052.01	2684.61	4692.06	4545.85	5453.33	3943.57	2675.18	3911.41	29861.96	18866.35	6108.85	29481.83	32525.42	29599.97	24629.68	7894.02	12801.47	20523.15	13903.83	13912.82	13124.95
MW2777	TG(i-19:0/i-19:0/i-20:0)	C61H118O6	372.115	356.0955	0.6325	2.371	1	--	HMDB0063877	--	--	1.0	-	-	1806.9	2384.16	174.42	569.35	1161.14	1824.61	1617.14	2262.7	1922.27	170.39	13090.14	568.15	52.87	8542.97	6104.8	6973.66	11376.34	26239.9	16778.26	3978.16	8370.04	8200.86	8213.01
MW2776	TG(i-19:0/a-25:0/i-16:0)	C63H122O6	294.0294	278.0096	0.8642	3.6138	1	--	HMDB0063239	--	--	1.0	-	-	1157883.45	816981.55	596147.84	788047.69	824446.53	635116.71	857319.48	590891.65	772962.21	492683.01	621877.55	2010821.52	774420.26	511531.83	615780.16	590387.61	620903.99	574690.54	607074.07	1549506.64	854020.24	862937.13	865237.78
MW9380	TG(i-19:0/a-21:0/20:0)	C63H122O6	371.1016	740.18	0.5615	12.955	1	--	HMDB0063625	--	--	1.0	-	-	620491.47	305727.13	288122.69	612547.13	1132772.89	1180844.31	1052040.37	884430.71	210025.74	292058.89	364943.42	146442.19	179481.88	314057.08	801323.68	387216.02	332511.58	283893.62	251249.99	135742.27	1540044.65	1593489.84	1337340.66
MW2775	TG(i-19:0/a-21:0/17:0)	C60H116O6	346.0786	330.0587	0.6054	1.7359	1	--	HMDB0063258	--	--	1.0	-	-	2359.23	5889.88	3487.35	6661.18	5947.4	5501.66	7958.38	8908.95	4813.68	5119.17	7838.41	18523.15	13324.92	8749.3	9352.88	7076.4	7840.46	5131.96	4224.82	5570.95	13202.19	12640.52	13239.86
MW9379	TG(i-19:0/a-21:0/13:0)	C56H108O6	405.026	382.0359	0.6832	1.0896	1	--	HMDB0064326	--	--	1.0	-	-	7201.93	1843.31	5590.76	4123.5	1942.44	5403.22	3404.63	2549.96	42853.01	5654.23	18977.87	17185.93	8090.76	18503.64	22261.38	18185.85	21463.32	67430.83	54400.3	11593.57	14512.57	14838.36	14537.76
MW9378	TG(i-19:0/21:0/i-18:0)	C61H118O6	460.1428	418.1086	0.6227	0.9115	1	--	HMDB0064128	--	--	1.0	-	-	7908.49	7417.28	21333.12	14641.78	7626.95	19299.1	6529.14	18278.48	7663.16	23928.92	7984.63	4623.64	37155.17	7765.76	8330.53	7981.56	3553.26	6655.6	6188.21	1418.79	12524.88	12579.15	12085.09
MW9377	TG(i-19:0/21:0/i-12:0)	C55H106O6	387.0922	518.1272	0.5349	4.7094	1	--	HMDB0063452	--	--	1.0	-	-	11721.65	88574.87	80986.75	9339.31	169778.31	54983.07	95413.18	129789.96	40605.4	64000.53	14794.31	20604.33	26404.02	19136.22	2602.93	13781.04	3183.42	3707.89	17634.73	20015.84	3109.75	3082.23	3144.27
MW9376	TG(i-19:0/21:0/20:0)	C63H122O6	916.0984	801.2237	0.6408	1.1118	1	--	HMDB0063390	--	--	1.0	-	-	17182.21	13961.28	42035.33	23911.15	10660.86	21850.08	9887.99	13082.44	14289.95	41027.2	49717.26	19298.97	8356.08	21560.49	19877.76	51751.26	50709.97	43540.07	23649.81	15720.66	41700.11	42246.79	41782.85
MW9375	TG(i-19:0/21:0/19:0)	C62H120O6	1087.1222	532.0675	0.5889	5.1934	1	--	HMDB0063122	--	--	1.0	-	-	958405.63	861239.77	379798.27	1838614.51	804058.94	986707.4	786320.33	837645.22	2058582.85	287987.36	178499.02	175723.06	133882.41	170962.54	188146.42	162278.03	152297.69	156742.75	162543.9	152223.89	336306.69	336318.54	332590.08
MW9374	TG(i-19:0/20:0/a-21:0)	C63H122O6	364.0539	341.0656	0.6604	0.732	1	--	HMDB0063002	--	--	1.0	-	-	1503349.59	1404242.25	1759817.65	1646823.44	1386929.93	1416188.46	1360535.33	1316416.1	1804593.47	1529272.51	1038503.05	1165518.04	605105.03	1035854.5	956184.16	1040198.31	1073618.2	1264064.44	1496795.76	1057255.55	1619673.21	1592111.88	1603431.32
MW9373	TG(a-25:0/i-19:0/i-19:0)[rac]	C66H128O6	529.0284	564.0421	0.6391	4.0577	1	--	HMDB0069527	--	--	1.0	-	-	41818.3	16933.61	35767.79	25055.98	18996.34	8015.92	23060.57	5490.71	16028.93	17648.33	40014.79	39645.55	1767.65	39722.14	36451.0	41944.36	48409.76	131637.59	144314.54	48146.19	45302.06	45664.01	45377.23
MW9372	TG(a-25:0/i-18:0/8:0)[rac]	C54H104O6	714.0371	714.0374	0.8923	4.0563	1	--	HMDB0069788	--	--	1.0	-	-	426916.94	124656.0	245830.55	122199.23	76069.68	62429.42	56097.79	58878.59	93194.15	135635.09	374178.23	426223.74	31262.14	411878.62	359021.37	419219.82	473873.62	404210.06	363817.12	558546.92	315921.8	316800.78	315007.22
MW2771	TG(a-25:0/i-17:0/a-15:0)[rac]	C60H116O6	795.353	774.3768	0.5912	4.6701	1	--	HMDB0069409	--	--	1.0	-	-	526.24	168.28	1760.12	186.25	2613.04	2008.69	2512.31	2004.92	167.78	171.55	8562.5	6005.22	15683.79	7742.23	9005.51	7669.88	7351.76	1631.8	999.81	15787.65	3989.6	3923.84	4105.13
MW9371	TG(a-25:0/i-14:0/i-18:0)[rac]	C60H116O6	424.9882	358.0359	0.5781	4.2367	1	--	HMDB0069323	--	--	1.0	-	-	32193.36	92740.57	57796.78	131119.42	131856.14	54689.52	135697.29	78761.77	131169.52	35100.78	708.5	90708.9	861.25	392.25	1396.22	1553.76	1900.59	30032.18	41249.18	10133.54	77549.48	76978.92	76469.16
MW2770	TG(a-25:0/i-13:0/a-17:0)[rac]	C58H112O6	391.1368	370.1628	0.5959	4.5854	1	--	HMDB0069407	--	--	1.0	-	-	54334.75	32998.87	53665.53	43008.89	39212.94	46100.14	34891.89	36923.13	32178.48	40190.05	12025.44	35036.88	23352.54	26591.23	28312.68	28671.52	11245.51	45086.44	45167.05	30218.45	37898.8	37567.3	37602.5
MW9370	TG(a-25:0/a-17:0/i-17:0)[rac]	C62H120O6	876.1469	812.1284	0.5546	4.8367	1	--	HMDB0069514	--	--	1.0	-	-	378518.48	128216.64	637587.19	272010.72	330096.42	271907.14	359397.27	248892.85	499185.53	395573.92	2898.38	12204.41	6874.13	5968.54	4135.42	4358.14	3553.75	37256.97	5814.69	1477.47	94265.8	96970.89	93900.51
MW9369	TG(a-25:0/8:0/18:0)[rac]	C54H104O6	293.1545	146.0732	0.5806	1.5285	1	--	HMDB0069990	--	--	1.0	-	-	492.81	86560.21	88736.52	85061.42	78280.59	93368.31	86770.46	85593.12	100720.58	94660.92	289687.97	92052.3	269068.61	212122.8	250986.16	219610.36	164153.77	47660.46	58957.03	66815.21	107474.01	107326.48	106563.75
MW2768	TG(a-25:0/20:0/i-15:0)[rac]	C63H122O6	189.1282	234.1256	0.7142	5.3842	1	--	HMDB0069566	--	--	1.0	-	-	148128.26	17052.72	20652.15	31321.46	76957.89	127858.64	65507.1	125131.35	83469.43	49881.52	23777.75	3943.25	12446.31	25448.8	32008.28	24677.04	26833.99	70817.42	54204.81	363.78	54320.45	53909.11	55817.4
MW9368	TG(a-25:0/18:0/a-15:0)[rac]	C61H118O6	295.1186	426.1526	0.6646	4.4855	1	--	HMDB0069601	--	--	1.0	-	-	37918.01	20780.98	30743.9	24781.69	13567.48	22961.43	14102.06	26795.64	20813.91	20778.31	36518.28	33369.12	3706.76	30409.26	29559.28	22994.2	28396.76	34642.48	30413.23	35267.04	29670.03	28314.8	29263.8
MW9367	TG(a-25:0/15:0/17:0)[rac]	C60H116O6	397.0313	330.0773	0.5962	4.5683	1	--	HMDB0069603	--	--	1.0	-	-	1965.56	23814.48	10414.74	10612.63	8083.21	8455.34	5220.59	7417.61	3511.61	6120.94	3779.04	1737.4	14127.22	96.13	201.62	233.87	3593.85	7523.38	12658.8	4419.81	23093.88	23333.84	23072.89
MW2767	TG(a-21:0/i-22:0/20:0)[rac]	C66H128O6	459.0846	424.1158	0.6087	4.6851	1	--	HMDB0067216	--	--	1.0	-	-	10800.28	22778.55	31216.32	30113.75	32424.43	45058.97	33356.68	42064.03	32887.59	32701.7	19417.05	8415.91	2770.52	13791.03	19532.03	16100.66	14165.2	10714.36	16484.99	4388.28	21997.98	22479.71	22357.96
MW2764	TG(a-21:0/i-20:0/12:0)[rac]	C56H108O6	475.1251	476.1319	0.6121	4.3611	1	--	HMDB0066815	--	--	1.0	-	-	24445.72	11654.12	24327.57	9983.19	5721.53	9580.28	9444.57	7329.18	9553.54	6460.45	21352.67	21010.62	12502.92	22807.48	16398.98	20114.67	20989.48	19406.14	26083.34	36898.0	17527.59	16967.35	17037.73
MW9366	TG(a-21:0/i-19:0/i-22:0)[rac]	C65H126O6	454.8996	340.0253	0.6059	4.0119	1	--	HMDB0067243	--	--	1.0	-	-	3786.71	6577.06	1684.21	795.32	4857.09	845.93	4173.07	1366.03	4729.45	463.73	509.41	12795.53	713.51	783.11	533.69	1125.48	799.79	3986.27	6978.33	553.91	6795.1	6920.16	6915.61
MW2762	TG(a-21:0/i-19:0/a-13:0)[rac]	C56H108O6	583.1704	567.1523	0.5899	2.0872	1	--	HMDB0067238	--	--	1.0	-	-	20477.04	17194.02	10465.24	15056.35	11465.34	12281.35	10695.88	5543.1	16100.53	1750.53	8978.46	7339.75	1124.82	14785.49	6579.77	20865.98	19811.84	26660.68	20889.81	1989.6	13962.12	13929.05	14280.67
MW2761	TG(a-21:0/i-18:0/19:0)[rac]	C61H118O6	411.0934	430.1111	0.6329	13.226	1	--	HMDB0066969	--	--	1.0	-	-	139282.68	137830.07	85436.2	86921.77	107720.27	111143.03	27816.23	52820.81	86933.45	23434.95	33667.48	25859.98	44375.49	27220.44	30447.44	39081.25	34989.93	50629.81	35766.16	62337.61	70577.95	58541.69	75028.06
MW2760	TG(a-21:0/i-18:0/18:0)[rac]	C60H116O6	385.0926	404.1107	0.6323	5.7418	1	--	HMDB0066781	--	--	1.0	-	-	12783.11	27252.17	31555.15	24076.7	47023.29	70404.33	38407.03	57242.5	19918.81	14452.88	9150.8	32466.37	8399.09	6846.58	10463.95	12716.71	10808.86	2308.83	5465.73	15932.8	21543.33	21574.73	21106.41
MW2758	TG(a-21:0/i-17:0/i-17:0)[rac]	C58H112O6	420.9955	384.0481	0.5584	1.7608	1	--	HMDB0066683	--	--	1.0	-	-	777605.53	2941435.12	1422863.49	1646024.11	2650837.76	1799284.42	1437217.64	2359611.32	2489740.5	2537730.49	1980766.62	2222549.72	1883192.39	3021825.0	1058898.11	3085065.98	3135230.74	2161104.69	2687750.54	949601.87	1670497.04	1672684.09	1638269.61
MW9365	TG(a-21:0/i-17:0/i-14:0)[rac]	C55H106O6	645.1102	322.0511	0.6154	4.834	1	--	HMDB0066070	--	--	1.0	-	-	70635.69	41171.85	121091.77	73975.65	67027.91	78344.19	76208.43	70897.66	80016.67	108734.98	2079.0	8421.39	9176.3	1518.81	1425.68	864.85	1157.91	8014.69	7478.14	1212.91	22422.41	22319.19	21304.01
MW9364	TG(a-21:0/i-16:0/i-18:0)[rac]	C58H112O6	1053.1651	526.0781	0.6028	4.9693	1	--	HMDB0065380	--	--	1.0	-	-	42093.81	31887.52	74893.81	96637.5	45215.93	64907.56	50464.89	40332.27	36072.33	54903.45	48014.17	45447.02	10713.64	41299.38	51924.54	36015.27	53911.35	42909.88	68785.3	47724.24	57736.49	57535.46	59316.22
MW2757	TG(a-21:0/i-16:0/8:0)[rac]	C48H92O6	696.282	680.2621	0.6268	10.3345	1	--	HMDB0064611	--	--	1.0	-	-	19686.29	19647.54	8921.26	18062.85	3372.71	27235.75	5906.39	22503.58	129.91	17792.76	2624.22	2380.4	4168.85	2586.48	2317.34	2702.94	3403.71	2258.46	2250.73	1185.15	16420.33	16680.15	16600.51
MW2756	TG(a-21:0/i-16:0/16:0)[rac]	C56H108O6	338.0186	301.0712	0.561	3.6458	1	--	HMDB0066212	--	--	1.0	-	-	14826.95	11242.8	5438.64	9094.36	8778.28	5448.62	9935.78	6677.76	8815.01	5435.93	7230.54	23452.91	9235.73	6321.24	6773.03	9569.5	8122.74	6484.01	5948.27	21030.18	13109.11	13344.11	13173.12
MW9363	TG(a-21:0/i-15:0/i-17:0)[rac]	C56H108O6	561.0955	494.1424	0.6397	4.7863	1	--	HMDB0066122	--	--	1.0	-	-	1268021.93	484910.68	1172807.38	1090240.67	648043.84	779434.63	557401.75	615890.98	1635529.5	1016967.8	41044.19	89641.67	201599.58	29662.35	3309.95	12418.75	5643.23	137480.39	106966.49	48221.8	265615.73	269935.05	266858.79
MW9362	TG(a-21:0/i-12:0/17:0)[rac]	C53H102O6	546.2996	504.2658	0.8976	0.8957	1	--	HMDB0065803	--	--	1.0	-	-	97488.73	47093.58	102709.4	21698.13	63747.01	25628.07	60619.59	23681.03	39466.33	44674.67	23639.93	34970.02	33103.35	29222.32	23613.98	22152.83	20606.5	33465.79	33427.44	11431.97	41541.86	41525.98	41761.71
MW9361	TG(a-21:0/i-12:0/12:0)[rac]	C48H92O6	724.1156	660.0996	0.642	4.7842	1	--	HMDB0065159	--	--	1.0	-	-	50306.42	25545.31	77382.34	62523.49	74790.79	68397.93	49217.97	56445.76	87561.95	93573.3	2298.58	2225.91	5816.94	1795.63	516.94	1634.77	1439.52	6772.08	3244.12	781.0	12332.02	12148.59	12501.01
MW9359	TG(a-21:0/a-25:0/8:0)[rac]	C57H110O6	481.1338	240.0634	0.6343	4.6268	1	--	HMDB0066953	--	--	1.0	-	-	3690016.5	722505.04	533040.41	609433.6	693128.43	238794.67	1194315.96	175429.0	4278408.75	322730.24	14893.62	671549.29	858116.76	542284.89	593113.76	548892.1	539164.9	592774.04	548604.61	761864.61	18075.6	18239.75	17014.99
MW9358	TG(a-21:0/a-21:0/i-12:0)[rac]	C57H110O6	509.0658	243.0379	0.605	3.9224	1	--	HMDB0064916	--	--	1.0	-	-	847.67	403.84	365.35	415.6	403.94	301.15	755.04	305.11	246.22	412.03	5196.2	13207.54	128.89	6488.5	2332.56	4414.74	5011.61	20392.21	11803.89	3404.78	7006.13	6626.15	7069.9
MW2752	TG(a-21:0/a-17:0/12:0)[rac]	C53H102O6	337.0385	356.0566	0.6319	5.6073	1	--	HMDB0066022	--	--	1.0	-	-	132816.59	13073.67	161908.1	70367.81	44560.36	106152.2	55518.72	82333.47	140348.96	152908.92	138115.71	77231.2	39907.56	132088.75	131282.37	113595.64	123013.93	65451.91	79365.66	80462.38	69930.59	70718.86	70229.68
MW2751	TG(a-21:0/a-15:0/22:0)[rac]	C61H118O6	412.1974	396.1784	0.6217	5.7881	1	--	HMDB0064791	--	--	1.0	-	-	151034.31	22364.14	54716.45	69944.22	138534.98	250156.12	142197.72	224091.02	185091.68	159424.97	116347.13	20625.95	42380.36	112224.98	108809.45	118767.37	121102.46	150761.77	190425.3	1604.81	148741.59	150888.93	150320.87
MW9357	TG(a-21:0/a-13:0/i-24:0)[rac]	C61H118O6	868.1432	826.1076	0.5874	4.7853	1	--	HMDB0064940	--	--	1.0	-	-	60909.0	23746.55	116671.67	60071.52	35111.06	42307.64	42322.62	44357.25	96891.03	74641.92	18542.56	13720.95	12429.07	11858.97	10665.48	17581.69	20372.96	21979.4	9946.79	15803.21	18618.88	19509.12	18328.32
MW2749	TG(a-21:0/a-13:0/12:0)[rac]	C49H94O6	551.0901	532.0887	0.5172	4.66	1	--	HMDB0064951	--	--	1.0	-	-	8827.29	18146.56	15985.77	18483.3	22177.83	19575.12	18215.85	18918.78	10598.66	18369.93	5277.69	4835.99	3147.61	4615.78	5749.32	5330.71	4842.51	4026.96	7742.1	5321.57	11361.97	11556.6	11459.22
MW9356	TG(a-21:0/8:0/a-25:0)[rac]	C57H110O6	649.2461	602.2332	0.6438	4.7675	1	--	HMDB0065822	--	--	1.0	-	-	1654563.64	549409.39	2005748.48	657672.25	907931.53	888223.67	886654.7	805086.78	2034856.81	716921.67	123882.88	45063.17	125515.75	108201.14	94871.44	120124.61	139095.79	926513.06	555842.81	14724.32	393710.05	393618.72	384737.51
MW9355	TG(a-21:0/8:0/a-17:0)[rac]	C49H94O6	703.0936	658.1204	0.5653	1.1103	1	--	HMDB0065303	--	--	1.0	-	-	34019.63	21118.36	20019.77	19087.95	19086.23	18326.92	18285.04	17997.39	34268.41	59400.14	16514.58	54484.59	9457.02	17532.29	45840.09	46024.9	49970.21	14988.91	16147.14	46185.58	49937.76	49856.87	50096.88
MW9354	TG(a-21:0/22:0/i-12:0)[rac]	C58H112O6	746.1913	364.0794	0.5882	1.4461	1	--	HMDB0067032	--	--	1.0	-	-	26291.05	43481.4	30535.03	34999.4	42389.78	33934.36	53452.58	34982.87	37913.41	35985.16	23877.34	33284.62	25993.44	22776.74	14619.81	21226.58	10472.99	3455.65	7055.08	23888.24	31245.13	30416.14	30314.95
MW2747	TG(a-21:0/21:0/17:0)[rac]	C62H120O6	491.1097	470.1366	0.5533	4.6851	1	--	HMDB0067419	--	--	1.0	-	-	7117.82	15632.66	20001.03	18154.37	21747.16	29242.9	23842.34	27874.16	21901.5	21785.85	7502.11	7858.08	4488.86	10703.64	8298.43	8535.88	13491.02	10899.35	11434.47	4927.37	16588.28	16797.89	16788.56
MW9352	TG(a-21:0/21:0/13:0)[rac]	C58H112O6	442.9777	366.0587	0.6408	1.8347	1	--	HMDB0066900	--	--	1.0	-	-	195102.26	284743.13	225934.24	275094.16	73291.99	426460.61	162265.69	200503.05	412567.75	527109.61	465130.63	186417.86	121066.95	330115.01	307344.9	449556.96	476599.87	369186.06	567395.21	365803.81	219200.74	261681.53	252073.71
MW9351	TG(a-21:0/19:0/i-14:0)[rac]	C57H110O6	429.0533	362.1002	0.6342	4.2037	1	--	HMDB0067545	--	--	1.0	-	-	889.36	4632.83	2892.58	5821.61	6479.86	2128.49	5239.46	2606.05	2171.13	1138.38	1120.08	2878.13	4322.03	663.22	143.84	137.03	344.15	2545.91	3411.71	258.32	9949.37	9855.73	9941.77
MW9350	TG(a-21:0/18:0/i-20:0)[rac]	C62H120O6	238.0381	196.0042	0.6367	1.6323	1	--	HMDB0067201	--	--	1.0	-	-	20676.55	15878.21	40433.19	20348.12	25167.51	17684.85	20372.9	20343.7	20141.23	53195.85	26930.72	28085.62	16698.21	30466.21	34130.66	31890.86	47420.23	31901.16	25078.91	29883.62	31410.6	30429.77	29958.4
MW9349	TG(a-21:0/18:0/14:0)[rac]	C56H108O6	625.1588	642.1643	0.5446	4.0883	1	--	HMDB0066539	--	--	1.0	-	-	3919.46	1911.99	5292.33	5091.05	3806.01	2004.02	1659.65	577.03	1494.92	1009.07	21565.22	37829.13	33889.0	42892.62	30974.21	30465.4	42624.25	49541.05	26980.02	62714.05	26719.24	26524.86	27013.39
MW9348	TG(a-21:0/18:0/10:0)[rac]	C52H100O6	462.9704	396.0151	0.5275	1.1118	1	--	HMDB0067096	--	--	1.0	-	-	7301.4	13611.28	19266.02	26486.31	11950.73	31217.25	13124.13	23248.06	20796.77	23157.44	28827.42	10784.24	16154.8	20303.86	28998.39	11153.66	14222.25	14642.92	16415.9	10416.66	18627.33	20053.41	19381.34
MW2745	TG(a-21:0/17:0/14:0)[rac]	C55H106O6	516.1379	517.1366	0.5321	2.7541	1	--	HMDB0066246	--	--	1.0	-	-	87954.15	58608.8	38023.68	44316.52	56868.98	36682.39	59623.08	41774.07	53212.19	34896.02	20852.04	137511.1	28407.39	17524.31	17198.84	15329.15	16987.1	12895.1	6764.06	75574.56	47612.09	47726.03	48146.13
MW2744	TG(a-21:0/16:0/8:0)[rac]	C48H92O6	543.0608	524.0625	0.62	3.6216	1	--	HMDB0065604	--	--	1.0	-	-	72745.05	35077.54	21517.33	33582.09	33877.96	18735.92	32264.7	18475.82	28998.25	10775.89	20708.32	147273.48	30626.73	17417.9	19218.63	22623.37	23586.38	23432.75	22043.1	97981.33	39429.8	39687.7	39745.44
MW9347	TG(a-21:0/14:0/i-21:0)[rac]	C59H114O6	835.0297	406.0206	0.6209	4.7612	1	--	HMDB0066222	--	--	1.0	-	-	192296.38	57082.18	246017.49	84612.9	96370.88	113588.11	155537.29	96505.34	236886.75	81511.79	3581.86	4092.83	4526.66	7320.52	4728.81	4214.95	10243.57	155314.69	78023.14	2116.85	47667.05	47953.94	47366.81
MW9346	TG(a-21:0/14:0/a-17:0)[rac]	C55H106O6	964.2516	900.2324	0.5452	12.9675	1	--	HMDB0065034	--	--	1.0	-	-	3473710.62	3531980.13	3188223.68	3084575.31	2809538.2	2554716.91	1697021.0	1936783.52	1822450.14	1071764.1	1001759.19	1287646.05	1460913.26	1830216.88	2268193.7	1904542.61	2258172.1	1961758.94	1470106.08	628451.18	1244315.24	1113595.63	775257.04
MW2742	TG(a-21:0/14:0/8:0)[rac]	C46H88O6	366.0043	367.0124	0.5924	0.9777	1	--	HMDB0066211	--	--	1.0	-	-	43435.28	11830.09	32251.11	53134.34	75219.96	99677.4	26522.01	95873.45	94846.93	33435.06	16169.04	12351.67	62235.81	16942.52	16264.63	15661.55	30906.5	6137.96	8249.96	7868.85	39315.51	39023.69	37146.36
MW9345	TG(a-21:0/12:0/i-20:0)[rac]	C56H108O6	631.1273	608.1377	0.6382	4.0946	1	--	HMDB0064822	--	--	1.0	-	-	101259.44	68192.83	36199.66	34360.73	55300.8	20699.61	41413.52	22085.34	36874.21	1388.96	12956.07	35056.53	1074.82	14151.1	15771.6	14783.17	1739.12	12824.09	65546.99	760.22	25070.33	23904.13	21743.8
MW2741	TG(a-21:0/12:0/i-19:0)[rac]	C55H106O6	376.0343	395.0489	0.548	3.6203	1	--	HMDB0064928	--	--	1.0	-	-	160622.04	48629.21	30233.41	66345.03	47437.33	42421.95	29608.67	18887.34	50282.16	4458.22	14526.71	158645.18	6177.27	17314.93	8488.86	41212.77	45516.34	65027.33	52277.83	68478.71	68625.54	70104.89	68493.76
MW9344	TG(a-21:0/10:0/i-14:0)[rac]	C48H92O6	592.1109	528.0938	0.58	1.5279	1	--	HMDB0066072	--	--	1.0	-	-	76045.77	52635.19	100890.61	88641.53	13463.81	126120.16	50199.34	134167.37	73682.2	130335.96	64545.82	10712.55	143332.54	61512.17	57706.09	64715.29	73246.4	87327.93	115495.02	58208.96	65901.44	66154.13	66400.39
MW2739	TG(22:0/i-22:0/i-20:0)	C67H130O6	457.1663	438.1679	0.6162	0.8632	1	--	HMDB0069162	--	--	1.0	-	-	11508.21	23964.41	16172.91	13111.74	16746.42	32302.96	21972.67	33576.87	4237.92	13980.23	12335.52	5561.54	976.56	7664.63	10581.09	11606.68	11388.41	11044.14	14061.8	5835.45	15019.79	15150.22	14997.65
MW9341	TG(22:0/i-21:0/19:0)	C65H126O6	542.0956	500.0625	0.6103	4.4228	1	--	HMDB0069158	--	--	1.0	-	-	4628.78	1354.4	1314.02	8373.72	5488.62	3796.15	5088.54	2652.03	3311.15	843.77	1251.13	871.2	294.77	522.29	115.34	120.03	198.04	530.69	617.46	91.72	6167.39	6122.02	6168.72
MW2738	TG(22:0/i-20:0/20:0)	C65H126O6	453.0961	416.1471	0.6252	1.4617	1	--	HMDB0068610	--	--	1.0	-	-	13565.43	2922.22	4745.24	4308.06	3093.26	5751.58	1783.71	1332.75	8936.38	1790.09	4804.14	7644.44	7712.02	4281.81	3733.04	8675.79	9412.61	24632.4	14697.76	5014.69	8192.73	8222.75	8452.02
MW9339	TG(22:0/i-19:0/i-22:0)	C66H128O6	597.1255	490.1839	0.6143	4.2578	1	--	HMDB0068568	--	--	1.0	-	-	398107.93	181800.14	588159.56	19781.29	220108.57	68081.27	237797.94	39213.62	318923.36	164607.69	2849.0	6356.18	49123.63	2726.62	2931.74	20262.78	4171.88	2935.19	50620.39	60893.32	6484.49	5728.2	6212.2
MW9338	TG(22:0/i-19:0/i-21:0)	C65H126O6	409.0226	408.0151	0.6367	1.8138	1	--	HMDB0068888	--	--	1.0	-	-	1721369.72	2323529.89	280919.52	394928.52	1755466.19	3753252.48	1799665.06	292471.38	3837111.65	3263791.7	2604611.54	2438260.1	1138049.29	2781943.0	2502752.39	4756921.59	2069479.74	5659177.72	3496785.59	1292317.81	1406454.87	1386212.82	928661.43
MW9337	TG(22:0/i-19:0/i-15:0)	C59H114O6	638.2379	637.2305	0.6444	10.0338	1	--	HMDB0068588	--	--	1.0	-	-	9982.47	3917.98	4139.25	5595.5	2473.05	6041.29	2535.05	3963.97	2512.47	2406.27	11737.75	4528.14	4768.4	11885.72	11294.29	10774.22	12186.38	4159.1	3167.14	4912.89	9390.79	9385.71	9078.89
MW2736	TG(22:0/i-18:0/i-21:0)	C64H124O6	431.0961	410.1213	0.644	3.6387	1	--	HMDB0068337	--	--	1.0	-	-	15397.62	4040.57	1781.76	2409.93	2515.5	1710.12	2661.72	1166.69	3075.33	880.09	1823.43	32589.36	2888.5	1103.15	1426.38	1765.42	1361.91	2556.23	1732.1	19719.6	5641.14	5372.49	5685.19
MW2735	TG(22:0/i-18:0/i-13:0)	C56H108O6	569.1844	588.2029	0.6155	4.585	1	--	HMDB0068063	--	--	1.0	-	-	58837.58	40794.73	64607.99	53358.03	43752.04	54664.48	39970.69	49159.81	34290.89	40569.7	22587.64	31871.47	22694.1	25544.07	25456.63	21968.38	24166.7	45263.83	41640.48	33510.42	39172.57	39177.25	39279.81
MW2734	TG(22:0/i-13:0/i-14:0)	C52H100O6	323.0592	324.0668	0.6283	6.2145	1	--	HMDB0068196	--	--	1.0	-	-	221846.11	50313.56	684377.8	114156.08	86651.01	106303.13	92606.93	92082.73	119356.76	142460.49	68401.74	22951.04	61879.81	71384.24	60273.91	78685.64	84873.31	73466.59	90940.69	50138.75	92891.44	95832.35	93580.39
MW2732	TG(22:0/a-17:0/15:0)[rac]	C57H110O6	358.993	338.0193	0.5747	3.7789	1	--	HMDB0068670	--	--	1.0	-	-	825.02	271.14	9285.99	243.4	345.05	959.15	160.66	4458.84	611.66	9659.86	8067.32	427.63	216.92	9774.61	9017.82	10830.1	13612.99	103596.76	92412.02	290.62	17429.72	17707.22	17930.6
MW9333	TG(22:0/a-13:0/15:0)[rac]	C53H102O6	679.174	612.2207	0.6465	1.4454	1	--	HMDB0069058	--	--	1.0	-	-	13531.99	17527.79	9378.63	15264.07	13955.59	325.92	13686.59	6799.52	6994.96	2537.79	534.68	10048.23	218.35	1100.94	1165.51	1856.96	3254.76	671.31	2227.48	15428.02	7622.53	8021.42	8087.34
MW9332	TG(22:0/22:0/i-16:0)	C63H122O6	599.0109	560.0472	0.6214	4.7343	1	--	HMDB0067711	--	--	1.0	-	-	46456.04	119564.11	199002.99	47684.55	70474.78	63746.48	69971.03	57122.79	167887.47	63004.98	1288.37	1102.23	39428.31	1048.1	2079.0	2629.4	1570.13	5709.97	6117.44	2299.57	30295.69	29901.87	27521.63
MW9331	TG(22:0/21:0/i-12:0)	C58H112O6	472.9879	396.0693	0.6201	4.651	1	--	HMDB0067678	--	--	1.0	-	-	24384.1	13052.58	23718.04	4825.38	7607.4	4655.21	4071.08	10175.04	20931.03	9158.35	488.91	6428.23	964.85	4921.62	5141.8	5329.5	5280.46	6785.71	6415.44	5829.46	7625.68	7635.82	7475.33
MW2730	TG(22:0/14:0/19:0)	C58H112O6	427.0098	406.0359	0.5923	1.4032	1	--	HMDB0067662	--	--	1.0	-	-	185044.52	70522.3	256486.21	118813.13	89088.9	178677.62	75948.8	170934.33	311501.36	276516.94	540399.15	227194.38	438351.88	568567.17	572883.24	505653.25	567929.25	550100.4	980896.38	110588.62	273280.88	269228.84	268981.95
MW9328	TG(22:0/13:0/21:0)	C59H114O6	703.2142	664.252	0.6059	11.9501	1	--	HMDB0068113	--	--	1.0	-	-	118892.28	9190820.41	175461.31	47553.42	76176.61	49611.3	51816.57	33579.64	1018705.24	21756.87	13837.13	4005346.09	13872.47	1247.23	416098.61	28530.16	7623.22	14562.8	10851.41	1447.93	69668.98	78986.32	44894.39
MW9327	TG(22:0/12:0/i-22:0)	C59H114O6	239.071	490.1475	0.6785	6.5538	1	--	HMDB0068815	--	--	1.0	-	-	20165.45	3653.73	60389.31	15204.24	4677.58	6944.05	3459.59	4786.47	28406.38	27482.03	3361.84	28520.13	3066.9	5076.2	5330.53	4589.8	4156.55	13664.64	15732.22	26821.3	18554.15	18354.0	17496.78
MW9326	TG(22:0/12:0/15:0)	C52H100O6	645.2335	680.2469	0.6264	4.8423	1	--	HMDB0068116	--	--	1.0	-	-	52575.02	33284.96	79336.44	53719.74	49145.9	62222.55	53096.19	46409.86	65607.41	86516.97	1298.72	6794.72	5584.62	2809.83	543.47	1759.36	1711.52	933.29	7362.89	3166.44	17678.23	17466.61	17368.81
MW2728	TG(22:0/12:0/13:0)	C50H96O6	379.0059	342.0587	0.544	3.6342	1	--	HMDB0067652	--	--	1.0	-	-	29595.3	20229.42	18055.26	21074.63	22678.59	19038.99	26331.36	16923.23	23704.79	14619.89	17418.39	37730.93	25544.5	13942.66	22276.87	16176.06	23103.64	15461.84	16544.74	33286.75	25010.66	25101.18	25102.34
MW2727	TG(22:0/10:0/20:0)	C55H106O6	425.1089	426.1162	0.8955	13.2335	1	--	HMDB0068341	--	--	1.0	-	-	78983.94	62328.42	22469.6	23114.64	30227.55	101341.33	47209.78	90953.49	77972.6	76681.1	31992.86	29063.05	51108.48	29069.62	23427.47	23474.28	26234.27	27115.75	28989.3	46205.37	50665.97	44561.78	46531.42
MW9324	TG(21:0/i-24:0/17:0)	C65H126O6	310.1135	292.0794	0.6342	1.5728	1	--	HMDB0067199	--	--	1.0	-	-	84607.76	58472.8	103638.03	63439.39	89016.32	88502.75	104421.18	125638.28	113540.69	104543.94	73143.23	79446.21	48836.59	114349.04	101800.39	117401.37	90253.23	101721.76	98271.84	72606.28	131868.0	129087.2	127598.37
MW2726	TG(21:0/i-22:0/i-21:0)	C67H130O6	375.0904	376.0981	0.6203	4.0294	1	--	HMDB0067267	--	--	1.0	-	-	33086.4	31174.95	40946.64	49972.89	34959.72	47897.55	41826.1	37694.36	20450.62	53360.83	22371.74	29586.44	51727.18	16721.1	22319.36	9971.51	11424.42	14708.42	22278.79	22239.9	32093.1	31812.35	31642.03
MW2725	TG(21:0/i-22:0/a-21:0)[rac]	C67H130O6	357.0613	376.0794	0.631	6.4798	1	--	HMDB0067544	--	--	1.0	-	-	12440.78	23710.07	29575.19	24640.41	26128.06	23131.27	29087.53	25633.16	25832.88	31119.68	24434.32	26748.8	26550.65	25085.01	24935.18	18679.37	23590.16	20124.44	24058.56	27464.85	30285.4	31310.69	30875.88
MW2724	TG(21:0/i-22:0/8:0)	C54H104O6	424.14	408.1209	0.6358	7.6928	1	--	HMDB0067208	--	--	1.0	-	-	17500.13	32432.78	16071.12	28919.21	22026.87	17671.6	25869.32	23623.1	22709.39	26551.2	18447.52	22462.55	17118.87	22070.89	22254.5	23468.99	21411.34	20258.53	18705.67	24518.8	27999.19	28034.41	27487.32
MW9323	TG(21:0/i-22:0/14:0)	C60H116O6	560.1626	542.1272	0.5673	4.0277	1	--	HMDB0067130	--	--	1.0	-	-	1638.34	42129.63	29004.38	8385.21	8485.42	10917.62	8054.04	11380.07	8040.41	12759.2	11697.29	13681.81	336.49	13696.81	16805.27	17140.65	16842.24	38796.29	43355.42	11134.26	15934.17	16229.61	16353.87
MW9320	TG(21:0/i-19:0/20:0)	C63H122O6	558.0673	558.0679	0.6423	1.1924	1	--	HMDB0066834	--	--	1.0	-	-	1766.38	1875.69	35276.05	2564.46	495.64	1807.2	1216.64	1749.61	5325.38	1454.64	17702.26	17360.53	5895.32	15903.43	10099.63	11497.13	13986.84	26887.67	20974.8	6730.69	11017.29	10833.76	11008.08
MW9319	TG(21:0/i-19:0/17:0)	C60H116O6	657.1596	618.1949	0.577	1.4441	1	--	HMDB0067194	--	--	1.0	-	-	76062.11	28588.8	23013.34	29391.6	37939.87	19727.27	40653.13	25425.08	26078.13	26595.29	11439.63	20155.43	510.58	14250.02	11113.41	12850.27	9677.87	5436.81	6459.41	11145.54	21370.84	21378.26	21164.63
MW9318	TG(21:0/i-17:0/i-22:0)	C63H122O6	585.1857	543.1523	0.6306	0.8134	1	--	HMDB0066957	--	--	1.0	-	-	5851.3	8819.41	8031.33	9345.34	6522.39	8522.17	9742.33	5870.22	3528.84	14033.84	1019.14	2075.7	2544.03	1856.73	458.72	1233.12	997.53	2955.92	559.25	2658.48	4950.72	4606.44	4242.39
MW9317	TG(21:0/i-17:0/i-19:0)	C60H116O6	705.0351	666.0704	0.5843	4.065	1	--	HMDB0066606	--	--	1.0	-	-	42578.11	10378.51	26419.36	18091.0	17508.05	8824.5	16197.18	5600.88	16207.06	17665.76	44569.6	32322.54	2855.75	47477.45	41414.94	44551.82	57538.47	132308.91	110130.02	51027.38	44843.37	43642.64	43814.25
MW2719	TG(21:0/i-17:0/a-21:0)[rac]	C62H120O6	275.0536	254.079	0.6361	0.8665	1	--	HMDB0066937	--	--	1.0	-	-	221226.45	180827.76	384519.23	441708.23	441237.04	528569.38	385491.17	520099.94	605574.0	561918.27	436844.02	165617.52	966271.44	145527.39	183990.31	422063.88	152107.79	373170.79	341876.67	192070.21	274378.58	257920.23	265439.31
MW9316	TG(21:0/i-17:0/8:0)	C49H94O6	492.0646	447.0927	0.6109	1.3027	1	--	HMDB0066213	--	--	1.0	-	-	71972.23	124706.81	67286.93	85334.64	100747.8	132734.93	84423.75	76919.52	201699.83	25878.56	38644.2	115147.44	10205.25	77836.45	53478.0	63166.22	58663.44	72488.54	69862.9	87385.32	136086.83	136316.27	137454.96
MW2718	TG(21:0/i-16:0/18:0)	C58H112O6	609.1459	628.1639	0.6437	1.2072	1	--	HMDB0064949	--	--	1.0	-	-	12742.59	5986.87	20929.24	4637.97	575.14	5516.7	1484.88	5320.74	5351.22	8373.91	24423.96	11524.22	17086.89	24432.82	26135.59	28328.0	27674.46	37947.63	28448.74	14061.52	13009.13	13153.11	13698.24
MW9314	TG(21:0/i-13:0/i-22:0)	C59H114O6	906.2801	829.3602	0.6207	1.4399	1	--	HMDB0065828	--	--	1.0	-	-	7860.7	12359.03	944.8	7598.78	9644.52	1726.47	8433.55	1101.42	5317.52	2194.75	825.8	4731.8	4280.46	377.03	422.65	312.73	1335.94	2387.26	2299.91	8529.6	3578.57	3653.31	3571.58
MW2714	TG(21:0/i-12:0/a-13:0)[rac]	C49H94O6	495.0636	248.0355	0.6483	7.6981	1	--	HMDB0066290	--	--	1.0	-	-	10393.57	12496.36	5594.58	8265.56	5359.5	6318.84	7485.67	6860.27	7856.64	7257.7	5902.16	6341.2	12672.66	8871.45	8838.46	8454.63	9523.19	16180.24	13866.66	12772.79	7597.8	9134.66	9096.5
MW2713	TG(21:0/i-12:0/16:0)	C52H100O6	823.157	804.1572	0.6147	1.2072	1	--	HMDB0065039	--	--	1.0	-	-	9976.51	991.76	16957.1	6724.77	1223.99	6395.22	485.02	1885.23	5710.65	6733.62	31842.43	19389.67	7078.24	30234.74	48770.95	38171.44	39208.35	49753.09	48852.01	4367.37	13746.67	13927.96	13275.77
MW2712	TG(21:0/i-12:0/10:0)	C46H88O6	546.9969	510.0468	0.5683	8.3545	1	--	HMDB0065590	--	--	1.0	-	-	9368.24	10348.5	9127.25	9287.38	10882.02	11728.88	13670.51	9836.06	9615.31	9023.24	10631.7	8429.84	9319.17	7814.0	8074.69	10661.87	10525.27	5985.33	8088.24	9556.43	11917.95	12476.47	11633.73
MW2711	TG(21:0/a-25:0/i-24:0)[rac]	C73H142O6	602.1825	583.1836	0.6484	2.1027	1	--	HMDB0068795	--	--	1.0	-	-	35068.18	27661.88	31471.68	19760.98	25067.4	19691.76	27142.18	21168.65	29244.33	20395.42	39237.03	21663.95	3192.77	36252.26	35934.22	40054.66	38279.11	36700.24	34233.63	16805.42	33551.23	33688.55	32720.28
MW9312	TG(21:0/a-25:0/i-22:0)[rac]	C71H138O6	257.1134	239.0794	0.6362	1.4123	1	--	HMDB0068915	--	--	1.0	-	-	23854.2	22669.56	34584.27	39844.78	37970.05	36871.79	36094.95	41522.26	29146.89	34680.95	22853.45	126146.74	5207.18	18772.56	23017.35	14440.14	17027.74	14001.77	12057.3	43180.11	35490.2	35784.28	33708.82
MW2710	TG(21:0/a-25:0/i-20:0)[rac]	C69H134O6	654.0947	638.073	0.5414	2.0979	1	--	HMDB0067489	--	--	1.0	-	-	30368.99	54965.55	61243.98	48751.2	68136.71	60790.91	72715.48	58526.19	74066.9	52078.7	70300.42	36481.95	10780.72	82721.99	70830.93	87347.55	82805.2	73875.21	68782.33	44615.04	54663.6	58471.52	57915.99
MW2709	TG(21:0/a-17:0/22:0)[rac]	C63H122O6	486.1454	531.1523	0.6023	1.3452	1	--	HMDB0066967	--	--	1.0	-	-	4817.35	14861.07	21562.3	6925.59	7523.89	11490.0	5059.95	26617.1	11331.61	14462.02	179842.27	138561.97	64162.66	187524.15	169769.31	178223.68	157007.66	107856.73	84430.78	318751.41	59386.04	57778.15	55090.83
MW9310	TG(21:0/a-17:0/19:0)[rac]	C60H116O6	534.1536	551.1574	0.6218	4.7338	1	--	HMDB0066804	--	--	1.0	-	-	1118763.16	1935231.12	763644.77	993502.04	1437954.39	1128506.5	2032417.4	894256.31	1542207.18	665283.31	13331.58	23718.28	4813.25	3565.43	33049.99	5588.35	3804.16	234131.12	208539.25	203833.85	25476.37	36790.88	40146.77
MW2708	TG(21:0/a-15:0/i-15:0)[rac]	C54H104O6	900.2676	884.2375	0.6075	0.7884	1	--	HMDB0065061	--	--	1.0	-	-	102034.74	331562.34	117967.52	108069.2	82679.21	108886.49	164170.61	79031.38	64252.33	96069.16	43680.28	60456.93	22992.09	41377.34	39136.01	43090.92	40246.93	38888.35	42813.09	58730.31	93493.71	93786.53	93193.17
MW9309	TG(21:0/a-15:0/15:0)[rac]	C54H104O6	650.2544	586.2383	0.8852	12.9804	1	--	HMDB0065810	--	--	1.0	-	-	63368.23	26567.86	13219.71	33499.99	93991.27	93341.53	161845.66	56491.94	306327.11	496745.8	354572.12	316431.79	613238.99	658310.25	222581.91	308463.37	273479.43	463415.91	523654.52	264013.97	171413.62	307312.79	292002.86
MW9308	TG(21:0/a-13:0/i-22:0)[rac]	C59H114O6	578.1083	593.1315	0.6209	4.2939	1	--	HMDB0064896	--	--	1.0	-	-	312398.84	278446.26	203581.86	249861.29	106670.18	120270.1	134132.48	112422.91	43153.48	116136.48	16344.43	20463.39	799.0	1213.06	1765.17	16260.37	19357.38	32361.95	56166.78	18449.37	14453.86	14973.52	14922.54
MW2707	TG(21:0/a-13:0/i-20:0)[rac]	C57H110O6	193.0353	194.0427	0.6453	0.8289	1	--	HMDB0066117	--	--	1.0	-	-	21396.56	32979.17	59777.52	41777.77	75673.27	60153.62	75106.31	63901.88	66215.86	50248.81	38553.67	19143.41	42128.73	40003.57	34299.39	27841.99	32730.41	66592.84	38351.25	12943.13	39036.42	39278.0	39148.29
MW9307	TG(21:0/a-13:0/a-25:0)[rac]	C62H120O6	1009.1637	932.2434	0.6106	4.7842	1	--	HMDB0065245	--	--	1.0	-	-	353604.9	77368.7	333478.53	187510.62	95287.91	124112.42	100066.58	107395.35	517078.06	193371.76	2752.2	2778.06	52503.7	2265.4	18883.72	807.8	24376.34	9780.1	8580.43	3057.55	56660.55	55602.99	56865.18
MW2706	TG(21:0/22:0/i-20:0)	C66H128O6	491.1195	492.1268	0.6498	6.5379	1	--	HMDB0066838	--	--	1.0	-	-	67824.1	113505.19	107006.17	108291.43	117871.09	95705.94	119974.85	99941.79	109243.04	107222.59	109232.31	116009.02	102496.67	105053.67	109897.96	102637.21	96341.87	88550.28	99336.62	108231.37	115555.6	114225.6	115426.02
MW2705	TG(21:0/20:0/i-12:0)	C56H108O6	322.0255	285.0763	0.5999	5.0002	1	--	HMDB0066383	--	--	1.0	-	-	1072.73	17926.69	8473.52	9262.68	48995.93	14834.26	42932.35	9021.24	4831.65	13876.16	22663.07	65421.29	21334.78	23890.07	21299.69	20194.59	14284.5	2763.76	6503.67	28823.13	16043.43	15647.77	17007.62
MW2704	TG(21:0/20:0/22:0)	C66H128O6	634.1409	618.1221	0.6277	0.8583	1	--	HMDB0066458	--	--	1.0	-	-	14610.73	57070.01	13647.62	45237.61	32390.25	77404.57	30795.08	18860.98	44236.71	87569.34	16086.01	21223.86	25530.43	16944.28	17883.29	16225.96	13642.08	10052.07	6977.74	15517.59	21547.1	23095.03	20639.19
MW2703	TG(21:0/19:0/i-12:0)	C55H106O6	497.048	460.1006	0.8299	2.3255	1	--	HMDB0066872	--	--	1.0	-	-	147145.58	141387.72	184634.3	208439.94	328718.17	175378.1	341062.11	167713.84	227960.94	183391.46	150387.85	161155.51	73170.95	114744.28	135724.26	134733.17	141573.0	113896.24	119106.73	107858.95	213079.58	211671.61	214687.76
MW9304	TG(21:0/18:0/22:0)	C64H124O6	1095.1244	547.0598	0.5793	5.1978	1	--	HMDB0066605	--	--	1.0	-	-	1592.64	622.53	1311.47	478.33	266032.5	537152.01	243784.79	188074.54	881.86	606183.91	57185.33	72259.01	9068.03	45980.61	54285.38	45703.7	61702.09	64511.94	74367.35	73331.06	86425.85	83482.24	86138.82
MW2702	TG(21:0/17:0/i-21:0)	C62H120O6	577.1803	561.1628	0.5533	2.0856	1	--	HMDB0066986	--	--	1.0	-	-	32266.34	30502.52	28277.58	31671.56	26490.49	10184.13	25328.07	14680.8	58782.32	13499.0	24412.95	27041.37	3473.84	23945.01	22937.13	25149.25	29504.77	35260.29	35448.96	14387.41	27810.94	27111.54	27987.0
MW2701	TG(21:0/17:0/i-18:0)	C59H114O6	697.1145	660.169	0.5193	2.5789	1	--	HMDB0067012	--	--	1.0	-	-	32033.41	47249.0	58861.25	27327.21	26075.64	24016.77	34484.05	23433.42	41510.97	32329.87	57654.98	47667.9	9821.28	50319.44	50191.58	56767.12	60451.86	50475.45	37616.26	69219.47	42638.36	42581.2	42532.64
MW9303	TG(21:0/17:0/a-13:0)[rac]	C54H104O6	230.9903	229.9733	0.6675	1.1061	1	--	HMDB0066229	--	--	1.0	-	-	1255394.85	3498966.23	3924167.49	4250604.56	3302999.53	5117520.23	3445963.05	5889559.18	3202159.16	6016367.46	3873276.41	2740667.47	4740492.27	3300473.81	3875100.32	3333864.52	3387773.48	3606405.47	3657768.29	1685159.65	3370893.0	3404132.01	3361249.7
MW9302	TG(21:0/16:0/i-19:0)	C59H114O6	361.0355	338.046	0.6379	1.2079	1	--	HMDB0066066	--	--	1.0	-	-	1875.77	33070.78	137852.45	64668.67	21551.95	52090.91	19880.09	51369.17	36423.59	27881.82	30646.37	20858.31	48735.07	28911.4	28852.5	17767.23	36595.12	19632.57	32368.95	37062.98	41319.98	41030.25	40924.92
MW9300	TG(21:0/15:0/a-13:0)[rac]	C52H100O6	430.0896	430.09	0.6397	12.9676	1	--	HMDB0065578	--	--	1.0	-	-	55093.63	50389.21	56135.81	50543.82	195022.52	182846.01	150528.95	148095.25	42659.21	26909.55	47826.58	26783.13	29238.09	36276.61	136369.23	57759.63	51133.3	16410.32	41322.58	23862.74	132760.1	131405.92	104102.85
MW2698	TG(21:0/14:0/17:0)	C55H106O6	270.9917	290.0096	0.6431	4.9178	1	--	HMDB0064863	--	--	1.0	-	-	96029.47	30542.56	91464.7	82206.39	25319.21	51740.82	41941.48	50570.99	63925.86	55699.84	36674.9	76252.22	14738.8	46311.19	60802.07	38990.37	49596.19	30646.73	34802.53	42335.99	60786.72	61438.22	64112.08
MW2697	TG(21:0/13:0/i-14:0)	C51H98O6	607.1333	591.1159	0.5574	0.9668	1	--	HMDB0064895	--	--	1.0	-	-	94189.6	20287.23	89940.11	98301.88	56883.07	60132.68	51919.52	60213.83	133872.46	55888.14	27206.32	41546.67	121039.97	68427.75	27679.91	36168.47	28530.27	22461.21	23043.34	21165.58	50058.46	49823.44	49428.13
MW2696	TG(21:0/13:0/13:0)	C50H96O6	509.0768	510.0832	0.5937	3.6051	1	--	HMDB0065436	--	--	1.0	-	-	29625.52	9349.0	3204.25	7421.08	9640.33	6311.53	9949.17	4259.22	5696.44	6025.61	9232.47	20413.99	15946.42	8723.56	8719.24	6919.72	12155.11	8075.95	8616.2	39665.87	17001.54	16184.59	16752.46
MW9298	TG(21:0/13:0/12:0)	C49H94O6	914.0632	448.0134	0.5681	1.2493	1	--	HMDB0066075	--	--	1.0	-	-	2582.01	6392.17	8845.17	9687.08	5438.55	9477.22	4859.53	6653.98	7415.18	3881.6	7446.24	8791.04	295.54	11457.1	2457.89	12214.78	9655.08	9775.73	15428.24	3070.26	11143.15	11726.08	11698.69
MW9297	TG(21:0/10:0/i-16:0)	C50H96O6	531.1171	544.1217	0.5749	4.7675	1	--	HMDB0065670	--	--	1.0	-	-	163107.66	21125.81	158386.1	23581.12	38224.99	56421.17	58759.85	42235.85	175746.0	29256.77	6358.71	2320.54	887.59	2046.44	1735.28	4963.04	5049.88	69647.18	52178.0	23634.24	15765.01	16551.88	15317.65
MW9295	TG(20:0/i-20:0/i-20:0)	C63H122O6	429.1184	428.1107	0.7346	8.3569	1	--	HMDB0065600	--	--	1.0	-	-	29481.54	33598.98	33572.7	31786.77	34326.55	45535.21	27038.39	39477.36	33412.67	37175.07	24783.18	32702.76	26725.56	35846.63	32490.31	33306.04	26891.44	27593.61	25726.83	19550.8	23894.56	23887.5	22775.0
MW2693	TG(20:0/i-20:0/10:0)	C53H102O6	641.1201	660.136	0.8083	8.2454	1	--	HMDB0063040	--	--	1.0	-	-	12678.58	24841.54	10877.83	27561.29	14602.68	43026.87	16768.77	35553.56	23832.67	31535.69	49126.39	46226.98	151575.59	46141.99	44004.06	39040.08	49951.7	5779.9	1919.92	23466.84	35861.63	34912.11	35025.34
MW2692	TG(20:0/i-18:0/i-18:0)	C59H114O6	260.0233	244.0042	0.6393	1.8498	1	--	HMDB0063243	--	--	1.0	-	-	235393.11	172161.71	145042.74	113705.9	169516.52	218988.5	128282.66	151954.59	207052.94	180905.73	323551.97	230387.27	103580.88	507756.38	313422.0	345626.24	349747.99	530763.79	484135.53	246491.21	232197.56	240002.56	239104.49
MW2691	TG(20:0/i-17:0/14:0)	C54H104O6	385.1461	366.1467	0.6148	0.8465	1	--	HMDB0064132	--	--	1.0	-	-	49124.32	145945.4	42033.13	66532.94	131201.74	59204.62	101350.78	67222.15	40207.61	32303.62	16058.82	43811.19	15680.35	10014.27	32075.04	16626.33	15961.66	13869.59	19409.84	21377.08	57008.47	56359.8	57037.83
MW2690	TG(20:0/i-16:0/i-14:0)	C53H102O6	279.0192	260.0202	0.6451	4.3066	1	--	HMDB0063881	--	--	1.0	-	-	277.04	12352.24	11692.75	413.73	340.28	257.1	251.98	136.73	7474.69	191.32	84281.13	31307.85	29079.52	93448.45	77046.85	92863.69	93152.21	11882.91	5752.86	614.7	24292.71	24262.2	24396.49
MW2689	TG(20:0/i-16:0/17:0)	C56H108O6	811.2726	406.1416	0.5293	8.8975	1	--	HMDB0064349	--	--	1.0	-	-	17463.13	12599.58	7882.14	8044.68	8702.91	16021.18	10390.34	10844.78	1610.86	9798.03	9609.18	9808.84	9109.42	7811.77	4464.91	8412.51	11542.61	4699.64	6671.32	9843.42	17189.69	17557.36	17148.94
MW2687	TG(20:0/i-15:0/22:0)	C60H116O6	508.1096	492.0904	0.644	6.5379	1	--	HMDB0063147	--	--	1.0	-	-	23856.08	51206.89	42725.62	52977.93	52731.66	55314.95	59033.09	57136.27	51668.44	56583.6	61878.82	53580.86	48632.11	51619.59	53065.6	47065.52	47386.3	36770.54	42937.74	54458.59	55740.74	56209.37	56256.04
MW2686	TG(20:0/i-14:0/i-17:0)	C54H104O6	651.2351	326.1213	0.6402	13.1804	1	--	HMDB0063001	--	--	1.0	-	-	18216.23	1489.15	2975.07	4269.88	5229.77	7615.12	5150.86	5738.0	37301.61	3757.13	12458.45	4058.02	6309.76	4066.62	4275.75	7846.88	11548.78	1508.44	6743.42	5871.46	10016.41	9249.27	7242.57
MW9293	TG(20:0/i-14:0/i-16:0)	C53H102O6	759.2356	741.2025	0.614	4.1165	1	--	HMDB0063352	--	--	1.0	-	-	49359.77	1496.75	22124.12	28401.11	31229.19	685.32	32433.5	1069.66	35373.71	317.04	29267.35	164245.42	232.02	49482.88	39250.65	49009.52	53573.9	74679.98	64764.08	175220.43	67519.6	67487.0	67265.91
MW9292	TG(20:0/i-13:0/i-18:0)	C54H104O6	987.304	482.1577	0.6279	4.51	1	--	HMDB0064182	--	--	1.0	-	-	97956.37	58817.85	15419.68	50253.33	51579.96	31468.55	73421.67	38907.44	39058.99	9978.53	58290.93	73310.23	48502.86	51463.68	80552.61	64354.99	56543.06	49247.35	41929.93	107714.39	61408.13	61766.95	58644.74
MW2685	TG(20:0/i-12:0/i-24:0)	C59H114O6	427.1255	428.1319	0.5803	4.0121	1	--	HMDB0063760	--	--	1.0	-	-	10833.19	5311.63	126.44	3899.18	109.0	206.71	134.83	141.84	6208.61	4986.9	37096.02	12564.73	32103.98	36722.12	34232.81	36168.9	37119.83	184.85	1885.47	170.47	14564.35	13975.19	14499.05
MW2684	TG(20:0/i-12:0/i-21:0)	C56H108O6	698.1775	661.2305	0.5774	7.078	1	--	HMDB0064177	--	--	1.0	-	-	6430.96	15519.16	18911.12	12259.16	9723.24	5762.97	11690.33	8840.8	12785.46	10406.4	19922.06	16107.71	15706.16	13534.43	15698.42	16507.41	16850.64	14240.98	13649.98	14707.88	17848.94	17422.85	17752.8
MW9289	TG(20:0/i-12:0/14:0)	C49H94O6	459.0806	486.0985	0.6806	4.7858	1	--	HMDB0064366	--	--	1.0	-	-	583659.69	151209.55	525039.37	418498.91	181702.66	244714.56	199746.29	293174.73	994427.87	354769.66	6687.21	13897.14	90586.72	3579.75	841.37	2178.35	1721.22	58317.85	5197.72	3894.49	103014.51	104658.07	100046.74
MW2683	TG(20:0/a-25:0/i-24:0)[rac]	C72H140O6	868.2774	852.2629	0.7418	1.5268	1	--	HMDB0064657	--	--	1.0	-	-	183222.86	156440.11	65965.09	88078.06	173890.61	59155.65	177892.88	58276.17	82510.62	58277.03	7745.6	54815.68	2593.25	9695.45	7434.84	7449.16	23763.0	8414.04	16598.8	114598.71	59098.63	58048.08	59164.74
MW2682	TG(20:0/a-21:0/i-18:0)[rac]	C62H120O6	699.2995	680.2979	0.5351	10.4014	1	--	HMDB0065869	--	--	1.0	-	-	15622.69	23007.7	54889.42	62803.69	7738.64	29406.26	9584.29	19804.09	336.6	57398.97	2879.02	5230.7	6697.18	3928.35	2205.04	4665.08	2768.62	2766.14	1893.32	4059.97	17917.16	18409.51	18394.25
MW9288	TG(20:0/a-17:0/i-24:0)	C64H124O6	747.1245	362.0672	0.6108	4.7919	1	--	HMDB0063759	--	--	1.0	-	-	52186.79	28734.91	84611.17	81545.64	43760.56	74057.87	37615.94	51103.58	52708.36	59836.68	2904.07	4272.64	13147.45	1530.2	1656.69	2795.98	2637.33	13351.17	5485.51	3915.76	13245.25	12440.45	12064.96
MW9287	TG(20:0/a-17:0/i-13:0)	C53H102O6	217.0207	150.0681	0.5994	1.111	1	--	HMDB0063800	--	--	1.0	-	-	63276.16	48426.22	111054.16	62824.51	48718.17	74910.08	54912.03	94020.86	101095.52	112762.39	149456.12	87690.93	94201.63	138248.52	149976.08	128799.74	126711.87	209680.5	194191.69	54735.52	95728.01	95885.17	97766.22
MW2681	TG(20:0/a-15:0/i-19:0)	C57H110O6	449.0926	450.0985	0.5532	3.6881	1	--	HMDB0064078	--	--	1.0	-	-	13590.61	11944.44	13121.97	18121.34	20416.23	17190.2	17128.06	18416.43	28257.09	20932.78	41531.99	40806.35	22325.3	38986.49	42511.64	49356.34	45872.73	24641.08	22425.5	31762.45	29751.3	29990.71	30608.48
MW2680	TG(20:0/a-15:0/i-18:0)	C56H108O6	209.0453	228.0634	0.6386	5.0839	1	--	HMDB0063302	--	--	1.0	-	-	29920.86	94940.18	58566.0	74022.18	99385.55	78176.05	132351.93	86366.23	44148.34	86248.19	87901.48	73744.44	78240.32	94904.91	68100.36	65476.7	57803.59	43185.91	47828.35	62934.27	68775.09	73519.39	72834.28
MW2679	TG(20:0/a-15:0/i-17:0)	C55H106O6	877.145	896.1622	0.627	1.3284	1	--	HMDB0064221	--	--	1.0	-	-	24302.3	6253.05	130044.84	20481.1	5153.38	86298.36	7466.58	80545.81	79286.72	67860.78	152766.13	112908.5	80606.77	82171.02	88637.38	74285.18	161804.89	135983.97	259599.9	29796.29	91532.84	97031.48	97934.21
MW9285	TG(20:0/a-15:0/i-14:0)	C52H100O6	901.1972	878.2058	0.5788	4.7147	1	--	HMDB0064195	--	--	1.0	-	-	54563.65	88359.92	126076.32	42635.82	138139.84	62693.73	69146.66	82544.55	105828.58	61791.35	2227.73	751.19	14683.93	636.57	569.22	585.27	1044.3	7799.19	5383.28	690.17	7951.03	7956.4	7690.55
MW2678	TG(20:0/a-15:0/a-15:0)	C53H102O6	646.1302	625.1552	0.6321	11.5148	1	--	HMDB0063380	--	--	1.0	-	-	55779.5	46366.8	48696.06	49052.08	53886.25	59511.81	51382.12	55608.23	51022.5	55789.37	42274.8	275.04	43586.93	38379.44	42450.69	43131.83	40016.75	35958.46	94.94	37356.68	79597.6	84022.27	84158.58
MW2677	TG(20:0/a-15:0/15:0)	C53H102O6	908.3402	892.3306	0.6317	1.1955	1	--	HMDB0064432	--	--	1.0	-	-	130449.97	187439.79	80678.88	97516.5	143216.56	63522.74	133098.89	61935.59	57108.93	39916.85	43455.92	108593.62	27906.01	19093.52	25393.0	22600.2	14654.3	5878.84	3489.03	72139.46	62784.97	63044.65	62823.65
MW2676	TG(20:0/a-13:0/16:0)	C52H100O6	1003.2592	502.1323	0.5896	4.1035	1	--	HMDB0063399	--	--	1.0	-	-	21589.96	2046.63	14617.91	7140.07	8457.82	4070.74	5692.17	4501.33	26925.8	2268.53	569.14	310.83	129.19	1255.4	790.98	449.87	288.09	2336.58	1778.57	120.28	4422.38	4402.89	4388.54
MW9284	TG(20:0/22:0/a-13:0)[rac]	C58H112O6	586.9935	274.0147	0.6065	4.7048	1	--	HMDB0066226	--	--	1.0	-	-	129915.4	102540.58	113940.11	46601.94	183070.41	47682.37	72070.46	76841.35	135409.67	124788.26	3296.33	2931.2	11358.19	1377.68	5055.0	6838.97	3243.91	1468.67	5937.45	14073.29	4028.08	4029.63	3988.17
MW2675	TG(20:0/21:0/i-15:0)	C59H114O6	375.1249	356.126	0.6495	1.6276	1	--	HMDB0064652	--	--	1.0	-	-	29036.99	18060.95	16521.98	13596.64	22160.2	10997.15	21640.59	11774.39	25489.91	11125.57	11209.21	45205.06	1139.6	19341.55	20484.98	19679.33	19800.06	21973.9	15985.15	105505.19	21834.84	21329.13	21872.14
MW9283	TG(20:0/20:0/a-13:0)	C56H108O6	294.0488	271.0601	0.6012	4.6518	1	--	HMDB0063396	--	--	1.0	-	-	32812.01	28806.03	28995.2	32203.84	18978.7	39523.86	21294.9	25771.67	28200.95	28403.51	30124.17	32013.16	29850.77	31466.56	31070.79	32441.76	31484.86	40596.24	44304.08	24736.33	17890.21	20738.8	20186.07
MW2673	TG(20:0/19:0/13:0)	C55H106O6	531.0198	494.0697	0.5636	8.3534	1	--	HMDB0063499	--	--	1.0	-	-	6313.37	7188.12	9246.78	7125.68	8750.37	6673.32	9638.05	8290.31	6453.21	8930.92	8351.36	7892.01	4979.98	6515.74	6717.08	7526.14	6691.17	5855.9	6649.39	5546.78	10179.54	10588.4	10034.77
MW9282	TG(20:0/18:0/21:0)	C62H120O6	874.2347	832.2003	0.6287	1.4255	1	--	HMDB0064187	--	--	1.0	-	-	2074.31	12803.96	25693.32	27056.21	6596.43	8533.79	4738.41	6052.86	10247.6	4075.88	1214.92	10237.89	260.49	2184.39	2073.08	1571.36	1011.52	863.09	590.62	6721.0	8383.95	7799.55	7740.79
MW9281	TG(20:0/17:0/i-16:0)	C56H108O6	432.9335	318.0587	0.6356	4.6343	1	--	HMDB0063587	--	--	1.0	-	-	1499.53	105946.83	27461.71	59731.93	75220.95	25391.67	71867.43	16421.9	58256.39	8340.05	28949.8	36600.6	35289.47	30140.42	30434.47	31317.81	29259.14	30977.23	27749.67	40133.66	11709.93	11871.61	11960.22
MW9280	TG(20:0/17:0/22:0)	C62H120O6	431.0269	384.0151	0.5792	1.5189	1	--	HMDB0063539	--	--	1.0	-	-	6487.8	46691.89	50666.95	32638.86	36339.02	47313.6	40814.97	43500.22	40208.33	53160.34	23698.02	15340.68	10229.67	23296.4	25457.23	18486.99	17697.93	43640.1	66187.79	16570.02	28082.33	29122.56	28688.45
MW9279	TG(20:0/17:0/19:0)	C59H114O6	819.0479	398.0308	0.545	4.979	1	--	HMDB0063164	--	--	1.0	-	-	1750.16	749.0	236.59	2095.01	2896.88	323.42	2182.26	2119.93	394.57	800.7	25436.12	7035.71	12080.07	25720.56	29449.44	25581.09	26273.56	5978.5	4253.46	7684.81	11601.52	11367.13	11344.65
MW9278	TG(20:0/16:0/i-22:0)	C61H118O6	195.0288	212.0321	0.6484	4.3428	1	--	HMDB0063478	--	--	1.0	-	-	4936.07	1699.13	153.27	148.16	153.78	258.37	266.16	234.41	5191.41	97.82	36432.93	160.83	4047.35	28999.78	30340.01	28234.81	31912.6	4402.98	2212.86	348.46	11932.11	11965.55	11504.35
MW9277	TG(20:0/16:0/14:0)	C53H102O6	601.1607	628.1428	0.5323	1.4287	1	--	HMDB0063117	--	--	1.0	-	-	6457.39	18700.98	107489.9	34945.61	3309.43	21645.49	5915.48	15833.68	33363.85	11664.28	18671.97	42062.92	12439.07	15691.74	19869.18	18683.28	20580.66	21510.03	19200.47	34592.56	29732.65	29064.37	28633.83
MW2667	TG(20:0/15:0/15:0)	C53H102O6	841.2718	842.2786	0.631	6.4714	1	--	HMDB0064544	--	--	1.0	-	-	18238.93	7166.63	9582.35	15022.06	12857.31	4037.29	25391.02	6029.42	100735.76	10532.57	56837.33	38514.17	2048.31	50974.25	39474.29	49930.87	49518.03	10654.97	14370.56	152288.66	4631.22	4762.5	4808.48
MW2665	TG(20:0/10:0/17:0)	C50H96O6	1047.2829	1048.2942	0.5349	2.1027	1	--	HMDB0063937	--	--	1.0	-	-	18987.04	14675.94	17952.96	11257.41	13165.96	7651.08	16058.27	6896.21	21294.43	4520.65	24605.39	4950.44	175.97	24197.91	23371.12	24911.12	26768.65	24584.62	18023.78	3229.74	17915.0	17729.92	17704.74
MW2663	TG(19:0/i-21:0/12:0)	C55H106O6	649.1256	630.1255	0.5912	11.5231	1	--	HMDB0063204	--	--	1.0	-	-	8556.18	5378.0	54.95	5714.81	4735.68	55.18	4152.58	5119.8	43.15	5120.35	10615.1	67.86	48.47	11665.26	10161.6	9611.3	11644.18	9499.04	10437.82	8608.86	20384.39	20494.8	20977.13
MW2662	TG(19:0/i-20:0/22:0)	C64H124O6	323.0183	286.0689	0.5878	1.7356	1	--	HMDB0063265	--	--	1.0	-	-	80913.48	78052.0	59219.3	52509.2	44581.2	82220.13	32679.48	110573.01	46777.95	82571.86	85113.81	57163.72	55629.29	91346.34	76188.76	77490.6	89220.04	118923.42	109062.26	68237.16	73252.72	73997.44	74757.85
MW9274	TG(19:0/22:0/i-22:0)	C66H128O6	1015.3005	488.1682	0.6246	13.2013	1	--	HMDB0063817	--	--	1.0	-	-	89936.86	74762.41	67020.12	70255.28	47529.67	37636.08	33761.36	39209.78	32482.61	36792.03	34157.11	40288.67	44772.52	48789.61	42583.68	46281.35	46218.81	38386.16	37755.59	15934.68	29611.34	29468.59	19482.78
MW9273	TG(19:0/22:0/16:0)	C60H116O6	627.101	644.1047	0.8763	0.8189	1	--	HMDB0063627	--	--	1.0	-	-	43378.91	95375.27	48705.91	129858.34	160797.65	98551.68	160184.61	101510.33	86311.18	76761.5	22399.65	43841.44	31415.41	18951.04	20012.42	18143.32	16892.84	1316.77	2146.89	36248.46	47355.04	47508.29	47899.27
MW9272	TG(19:0/21:0/i-20:0)	C63H122O6	381.079	416.093	0.6473	0.8264	1	--	HMDB0064126	--	--	1.0	-	-	27280.96	68752.54	119430.28	100232.71	34832.36	99875.59	58274.75	160547.25	50266.55	141941.29	53666.26	40416.09	145061.72	58489.19	74010.41	31885.99	33847.62	96733.5	103401.88	15217.72	58648.11	58555.38	57347.09
MW2658	TG(19:0/21:0/i-16:0)	C59H114O6	987.2021	494.106	0.5676	1.6109	1	--	HMDB0063160	--	--	1.0	-	-	6524.47	8255.76	9579.97	5965.22	15629.66	10473.56	17105.89	10491.09	19140.79	35589.65	55898.42	21004.43	8239.94	54450.8	57022.5	23165.77	23491.7	19549.08	22324.66	10145.93	29576.19	29084.96	26734.28
MW9271	TG(19:0/21:0/i-15:0)	C58H112O6	451.0934	478.0747	0.6883	4.1001	1	--	HMDB0063165	--	--	1.0	-	-	42444.47	25909.74	17265.98	15285.66	22334.0	9660.02	21343.2	6834.23	16549.32	2832.08	6123.31	8013.72	1462.68	401.68	6089.0	6329.45	434.6	13994.94	22209.3	10275.69	10025.85	9354.69	8878.21
MW2656	TG(18:0/20:1(11Z)/20:1(11Z))	C61H114O6	235.1334	198.1844	0.8721	5.9144	1	--	HMDB0005407	--	--	1.0	-	-	391257.61	59523.76	123060.61	186659.74	211461.3	625210.1	189605.18	602242.07	340633.95	246359.67	157562.13	15623.97	54747.51	154205.72	155952.29	159890.61	155965.5	115647.41	117629.37	1878.59	215864.09	217030.93	216496.35
MW9269	TG(16:0/20:4(5Z,8Z,11Z,14Z)/20:4(5Z,8Z,11Z,14Z))	C59H98O6	415.1452	414.1378	0.6439	0.7949	1	--	HMDB0005392	--	--	1.0	-	-	88075.31	115209.03	120641.67	98595.81	260436.73	80661.01	245110.12	83703.12	148183.99	181227.34	52537.74	93075.32	30670.37	52038.1	48303.98	52734.38	51298.24	34985.93	34719.93	96259.86	99044.0	99061.41	98409.01
MW9268	TG(16:0/16:0/18:2(9Z,12Z))	C53H98O6	270.1511	252.1157	0.5395	3.8868	1	--	HMDB0005362	--	--	1.0	-	-	20090.72	38604.92	10705.9	18590.95	21794.23	23852.35	23054.35	25025.94	1068.38	14200.34	435.67	17447.22	6143.7	1836.21	571.97	1233.77	939.34	2655.97	737.51	4096.02	13698.22	14097.02	13319.38
MW2651	TETRAHYDROTRIMETHYLHISPIDIN	C16H20O5	273.1131	292.1311	0.6436	7.2788	1	--	--	--	44639.0	1.0	-	-	11371.62	5211.73	13955.14	10791.12	573.63	3258.65	332.93	6756.95	16170.87	18404.78	8013.84	5218.28	1124.97	6439.14	6613.76	11101.76	5922.52	13653.52	9982.86	1210.73	13859.38	13899.24	14250.44
MW9257	TETRAHYDROGAMBOGIC ACID	C38H48O8	632.3336	632.3349	0.6079	4.1752	1	--	--	--	44516.0	1.0	-	-	75277.4	168443.2	42053.26	12990.36	4051.3	5206.27	4788.2	7780.99	5314.65	9749.82	86941.74	72701.81	173252.72	51812.67	58449.71	60842.43	81687.1	117370.67	118308.3	130919.43	58092.71	58867.71	57995.78
MW9246	TETRACYCLINE HYDROCHLORIDE	C22H25ClN2O8	519.0926	480.1299	0.6158	4.778	1	--	--	D02122	--	1.0	-	-	1103735.88	330863.83	1522533.97	611132.69	535385.43	637929.11	539315.12	486605.88	1486885.09	668260.11	47478.4	49209.05	1740.71	18673.79	34402.22	48284.21	57393.55	374468.44	243767.56	35853.43	213978.67	216338.41	209697.77
MW9241	TETRAC	C14H8I4O4	730.6532	747.6602	0.508	4.767	1	67-30-1	--	--	43907.0	1.0	-	-	357161.51	110562.44	525852.55	70342.79	150488.75	164299.06	157088.43	156980.37	454727.45	115220.42	30781.3	8806.13	7136.75	36185.73	5448.25	39161.54	40798.23	241350.34	147972.34	6487.47	77614.41	75813.28	75626.64
MW9222	TEGASEROD MALEATE	C16H23N5O	302.1968	301.1903	0.9271	4.7878	1	145158-71-0	--	D02730	--	1.0	-	-	307646.61	471752.0	174206.01	437663.67	510423.67	346102.21	568195.58	358302.76	185246.63	191624.47	1173022.95	1279759.38	308903.98	1159604.45	1093780.76	1151172.78	1152315.51	497953.06	535112.27	1498289.34	747162.93	752914.34	746992.32
MW2631	TCA-ethadyl	C6H4Cl6O4	348.8118	349.8241	0.5983	13.3094	1	2514-53-6	--	C19149	--	1.0	-	-	58655.89	64621.45	66592.63	68779.17	61664.52	68669.77	64166.38	62783.74	70167.23	64165.53	63517.24	62206.99	65676.75	60680.6	67546.55	59342.49	60246.67	58561.51	60061.45	60538.82	62040.55	63503.29	62901.41
MW2630	TBS-Corey Lactone Aldehyde	C14H24O4Si	283.1368	284.1444	0.625	13.2496	1	64091-14-1	--	--	63031.0	1.0	-	-	3095.79	3133.68	1624.84	1325.34	2335.57	4595.57	3250.57	3832.2	2722.0	3992.33	8414.93	10055.05	14841.71	8230.05	9515.48	10797.44	11420.63	6005.68	9674.78	12282.39	6039.19	7078.53	7092.0
MW2618	TAG 63:0	C66H128O6	1037.9302	1016.9711	0.5561	13.3177	1	--	HMDB0031090	--	--	1.0	-	-	374930.85	360181.94	356905.52	347620.01	343627.89	347338.01	327577.98	343976.81	363841.9	357873.66	328668.21	321607.99	337639.36	332083.62	325403.82	332329.3	320593.17	340518.43	337006.87	341105.88	305403.29	314436.98	312924.78
MW9211	TAG 51:0	C54H104O6	831.7761	848.7833	0.5129	4.5266	1	--	HMDB0031106	--	--	1.0	-	-	521.82	381.46	446.95	457.42	620.31	639.25	198.66	867.8	268.31	214.32	8752.81	1956.78	972.81	11671.28	9446.41	12708.59	12511.71	2052.42	760.52	946.18	2281.06	2637.44	2581.62
MW2616	Syrosingopine	C35H42N2O11	682.3009	666.2789	0.5351	10.6751	1	84-36-6	--	D01659	--	1.0	-	-	209603.75	476448.8	294567.0	264250.47	196100.54	568561.69	183424.92	446678.69	11654.37	305921.08	114854.14	180644.09	149577.75	142743.55	92113.58	131711.28	117574.45	92876.95	134011.67	97516.03	366648.22	379431.18	379694.44
MW2615	Swep	C8H7Cl2NO2	436.9647	218.9854	0.5687	2.2256	1	1918-18-9	--	C19062	--	1.0	-	-	524312.39	1172662.6	1329432.62	1233819.47	987237.88	2153563.01	2979066.73	2217921.09	1172164.45	1610186.19	2229808.94	1285843.38	1565230.28	2641849.29	2568752.35	1417425.47	1356496.37	1265453.0	2862863.77	3852232.26	1067686.94	963040.4	1004206.14
MW2614	Suxibuzone	C24H26N2O6	423.1615	438.1791	0.6917	1.5435	1	--	HMDB0042019	D01289	--	1.0	-	-	374.75	496.87	16629.82	3502.32	1088.57	5448.17	6518.06	6623.4	4434.73	327.31	35098.59	55308.11	14001.46	40797.32	25582.1	36262.29	42143.86	17339.94	14223.69	83112.26	14370.47	15132.61	15085.79
MW9207	Sumaresinolic acid	C30H48O4	536.3714	472.3553	0.6323	11.2792	1	559-64-8	--	C17070	--	1.0	-	-	76654.19	102217.39	49428.21	29378.73	74703.3	60975.47	54609.56	38429.09	51118.7	38751.1	11070.54	28952.62	10639.97	14354.15	6540.53	12311.32	11981.19	11918.97	9228.38	16083.82	43326.09	40357.89	38504.04
MW9206	Sultopride	C17H26N2O4S	319.1471	354.1613	0.6233	0.7941	1	53583792	--	C11708	--	1.0	-	-	20303.08	32449.62	40460.32	32740.63	54771.11	29356.18	50291.33	31868.02	42527.3	42657.05	33088.52	34118.52	10251.18	26737.27	29677.2	29535.68	31290.78	11203.34	10407.86	36839.06	32007.87	31836.67	31789.46
MW9205	Sultamicillin tosilate;Sultamicillin tosylate	C25H30N4O9S2.C7H8O3S	767.1755	766.1648	0.8801	1.0533	1	83105-70-8	--	C13129	--	1.0	-	-	532640.11	900688.4	126725.63	687823.98	667955.79	97035.01	684094.37	374945.35	666622.24	405008.94	126554.22	140465.31	16972.55	58311.56	159570.92	134034.87	67561.88	33717.29	34113.26	650277.42	160876.65	157505.52	156908.15
MW9204	Sulprostone	C23H31NO7S	465.1815	465.1821	0.6444	1.5349	1	60325-46-4	--	D02725	45609.0	1.0	-	-	11721.42	11147.7	13139.06	11494.18	11141.96	12552.6	11737.83	12235.5	14324.74	14364.41	38368.89	8442.35	36689.51	27962.93	32501.95	29534.67	21954.12	7503.76	2919.66	6106.21	9312.3	9062.7	9032.96
MW9202	Sulindac sulfone	C20H17FO4S	206.0267	372.0832	0.6826	1.5587	1	--	HMDB0060620	--	--	1.0	-	-	363651.91	487835.88	720186.5	513560.0	265868.31	857709.86	315188.59	575321.76	350299.96	901867.44	380036.75	233444.27	747671.51	398458.81	399676.64	445481.97	416997.23	536526.5	708693.96	91120.9	471184.16	459782.42	451548.94
MW2612	Sulfuretin	C15H10O5	269.0455	270.0528	0.6481	6.3878	1	120058	HMDB0137516	C08730	--	1.0	-	-	6880.16	465.01	9670.84	8529.35	492.21	665.53	204.7	1415.55	4307.87	3691.52	1439.11	16237.15	937.57	878.27	1021.32	1219.02	1425.69	1343.43	1833.91	10365.14	6561.06	6567.45	6455.96
MW2610	Sulfoquinovose;6-Deoxy-6-sulfo-D-glucopyranose;6-Deoxy-6-sulfo-D-glucose	C6H12O8S	260.0446	244.0253	0.6492	3.86	1	3458-06-8	--	C20829	--	1.0	-	-	304060.29	298936.71	237459.07	256155.55	313558.8	176868.09	265810.79	182288.76	166296.66	130915.33	280869.0	623692.2	345003.4	275451.81	213418.85	257378.31	248014.06	133060.42	146160.13	453190.79	268036.31	267196.61	250455.88
MW9201	Sulfometuron methyl	C15H16N4O5S	478.9575	364.0841	0.5476	4.6434	1	74222972	--	C10955	--	1.0	-	-	4364.52	9826.04	302.72	256.67	2510.91	283.27	1193.77	570.71	265.52	408.97	4139.95	11639.97	335.11	3380.33	3215.19	3717.35	3845.42	3057.25	440.04	5596.26	5390.01	5129.65	4980.86
MW2609	Sulfometuron	C14H14N4O5S	387.0167	350.0685	0.6145	1.7023	1	74223-56-6	--	C18895	--	1.0	-	-	127457.91	204814.93	86331.71	141025.31	32326.03	159222.5	37533.77	60593.54	185990.52	38195.05	102543.98	90811.95	28222.01	87092.2	59418.93	153968.35	151437.27	667744.43	216503.23	66500.97	362053.67	332426.63	314291.46
MW9199	Sulfite	H2O3S	158.8901	81.9725	0.5418	13.2767	1	--	HMDB0000240	C00094	--	1.0	-	-	12486.86	18627.75	17137.79	17054.17	18044.59	14086.89	17840.95	15891.46	14049.68	14980.18	16291.12	17584.57	14324.82	15211.48	17567.93	12835.3	15608.57	13727.31	12588.79	12781.89	16669.27	16871.15	16646.83
MW2608	Sulfathiazole	C9H9N3O2S2	291.9618	255.0136	0.615	2.9019	1	--	HMDB0015619	C11169	--	1.0	-	-	136156.9	209851.73	201189.35	207491.43	217567.76	208844.08	241215.82	243917.5	442448.06	235423.17	160002.93	201188.87	272923.99	496541.42	181140.18	156087.38	459169.47	223613.6	468380.77	497785.41	315761.56	301831.08	352566.53
MW2606	Sulfaphenazole	C15H14N4O2S	330.1023	314.0837	0.5956	4.2369	1	526-08-9	HMDB0015667	D01954	4101.0	1.0	-	-	21968.64	30838.72	35919.2	38459.5	39061.0	47005.23	38376.89	40465.76	31127.31	34050.92	24162.29	3128.82	3484.89	26202.05	24963.81	30426.45	22755.86	45606.19	42416.6	3389.01	22372.83	23811.89	22833.21
MW2604	Sulfamoxole	C11H13N3O3S	283.0869	267.0678	0.6333	2.3541	1	--	HMDB0015688	D02516	--	1.0	-	-	355.89	608.32	66.05	241.23	260.33	892.68	356.43	1057.1	121.04	206.34	10048.06	203.95	184.73	7390.16	9110.43	7897.18	7771.52	12992.61	15744.01	101.02	4484.26	4325.18	4294.69
MW9198	Sulfamethoxazole sodium	C10H11N3O3S.Na	321.0131	276.0419	0.6397	2.1254	1	4563-84-2	--	C17718	--	1.0	-	-	522824.08	496489.25	219347.58	229544.52	276387.64	261888.35	238561.3	274459.26	595790.39	272928.62	136939.15	248898.96	54928.01	161351.3	129475.94	118622.4	143556.72	485759.52	228395.21	204802.85	349647.48	356169.26	322395.18
MW2603	Sulfamethoxazole	C10H11N3O3S	252.0456	253.0521	0.5892	3.6218	1	--	HMDB0015150	C07315	--	1.0	-	-	17880.7	10644.96	4851.61	12627.93	14430.3	11274.98	13138.24	7840.27	12691.78	7191.43	4269.88	30330.97	10449.62	4341.57	9139.11	10252.16	9483.65	9641.85	5467.7	25243.11	13813.32	13796.28	13692.76
MW9197	Sulfacetamide	C8H10N2O3S	256.0743	214.0412	0.5959	4.5808	1	--	HMDB0014772	D05947	--	1.0	-	-	2104.73	573.74	435.5	631.58	258.7	706.44	1107.11	291.57	2127.68	2172.71	4750.75	3214.74	1494.95	6635.33	8446.14	6346.54	5573.25	10036.88	6822.38	2342.48	4872.84	5010.6	5180.51
MW9196	Sulbenicillin	C16H18N2O7S2	437.0448	414.0555	0.649	1.4685	1	41744-40-5	--	C11170	--	1.0	-	-	15583.87	50264.77	48232.29	86103.86	78369.12	7868.85	69056.46	15058.2	43047.62	42291.91	35596.89	50232.18	5810.91	32945.48	35099.76	27486.7	30270.85	16329.47	24100.56	52160.73	23087.72	25159.12	25745.1
MW9195	Sudan III;C.I. Solvent Red 23	C22H16N4O	416.1479	352.1324	0.6239	0.7977	1	85-86-9	--	C19527	--	1.0	-	-	13823.69	18396.47	19800.8	16011.6	36121.2	12435.63	41112.92	13021.3	22373.1	35626.12	6779.98	13736.16	2053.77	6677.19	4110.34	6317.56	10077.04	8861.28	5239.03	14205.17	14492.04	14457.72	14610.73
MW2602	Sudan I	C16H12N2O	495.1833	248.095	0.6085	4.3899	1	--	--	C19525	--	1.0	-	-	587.87	371.71	222.58	327.94	539.49	402.67	152.95	73.56	292.73	193.61	5610.3	4017.79	599.78	3816.6	3629.62	5891.12	5347.8	917.21	1423.11	5996.34	3728.71	3841.57	3684.52
MW9194	Sucrose 6'-phosphate;Sucrose 6F-phosphate	C12H23O14P	423.0898	422.0825	0.6492	0.7473	1	--	--	C02591	--	1.0	-	-	24465.22	6798.05	11661.49	12802.82	15594.41	2507.73	20756.56	1502.52	15505.59	13041.26	11277.91	65239.82	53236.75	14667.55	13862.55	25516.51	11682.67	9548.8	10339.63	31246.65	18345.32	18385.72	17895.05
MW9193	Succinic anhydride	C4H4O3	138.9793	100.016	0.6455	13.4538	1	108-30-5	HMDB0032523	C19524	24050.0	1.0	-	-	356045.12	383179.58	389234.47	141022.03	324421.16	359614.75	403319.74	407841.9	138442.21	358296.6	313859.5	407666.34	290420.81	132453.32	127103.94	327285.27	309923.42	89232.68	308501.35	299137.24	333770.0	337067.56	337178.91
MW2600	Succinic acid	C4H6O4	99.0085	118.0266	0.9568	1.6494	2-MetDNA	110-15-6	HMDB0000254	C00042	114.0	1.0	-	-	117909.57	76261.43	103535.48	57576.33	94479.65	75969.75	117307.13	76282.24	143674.87	71975.86	148935.41	160254.53	37602.56	78981.49	100442.99	102510.3	83558.97	112463.43	117323.12	230402.36	101320.84	100609.97	101177.47
MW9192	Succimer	C4H6O4S2	258.8896	181.9708	0.6325	13.9692	1	--	HMDB0014706	--	--	1.0	-	-	109863.68	59699.15	74308.52	66705.53	57196.45	137083.28	114790.73	109871.85	108432.88	113556.63	117019.73	161507.08	105779.94	129470.72	107246.7	127406.57	84217.86	89188.49	91460.72	112624.02	164188.19	151996.55	162217.42
MW2597	Stypandrol	C26H22O6	411.1165	430.1416	0.5169	4.6851	1	99305-33-6	--	C09971	--	1.0	-	-	45822.54	25450.06	67166.66	55414.56	50979.39	76899.56	55921.59	68994.62	20252.59	56021.24	44847.36	92025.79	30089.04	115411.37	44494.71	44059.47	55942.23	90914.21	191974.72	77455.55	109960.96	96842.86	109433.01
MW9190	Strychnine	C21H22N2O2	317.165	334.1681	0.633	2.4126	1	57-24-9	--	C06522	3463.0	1.0	-	-	284885.11	1553.17	22899.77	57804.09	499.88	15168.42	741.49	8941.23	366.54	22548.27	1571479.07	4689.3	826942.08	1139339.22	1468613.76	1598725.44	908855.66	682849.5	748728.45	684412.11	281911.78	283081.09	283103.91
MW2593	Strigolactone ABC-rings	C14H18O3	250.1449	234.1256	0.6498	11.0038	1	--	--	C18036	--	1.0	-	-	137152.78	213677.13	255711.38	266183.82	187490.25	257504.08	268014.93	264616.92	267777.24	267611.03	290490.17	276327.52	270735.46	167082.42	177782.5	160197.75	277958.62	208390.51	148047.27	104485.27	145112.0	142631.6	145112.89
MW2591	Stovaine;Amylocaine	C14H21NO2	272.1061	235.1572	0.6283	1.0865	1	644-26-8	--	C14169	--	1.0	-	-	43606.14	65904.37	49554.16	44424.15	114786.04	48499.34	160664.07	51640.07	70235.64	44725.16	19789.5	45549.02	24383.13	11292.63	14002.7	14205.27	19543.88	46027.35	33940.44	29109.2	50547.56	52412.0	50225.51
MW2590	Stipitatonate	C9H4O6	228.9752	208.0008	0.6226	1.0864	1	606-39-3	--	C02080	--	1.0	-	-	92171.16	187664.8	355096.4	231786.44	219219.77	273021.49	234273.38	633617.34	197091.59	254010.95	251966.66	82368.16	287844.58	226434.57	151997.08	159754.52	243683.86	154529.32	112598.35	147826.86	186687.64	183142.16	168018.66
MW9183	Stellettamide A	C26H45N2O	424.3424	401.3532	0.6455	8.6597	1	129744-24-7	--	C16893	--	1.0	-	-	787.77	315.49	282.39	193.76	30995.72	2842.21	34402.32	1687.83	7205.36	121.8	1173.53	322.12	19666.51	921.64	1123.39	1898.51	2567.19	2907.59	2263.13	871.26	4335.72	4410.62	4555.82
MW9179	Stearoyl-L-carnitine	C25H49NO4	428.3736	427.3662	0.7041	10.1681	2-search-DB	25597095	HMDB0000848	--	--	1.0	-	-	241415.99	31203.71	61650.63	55456.03	297182.93	200288.5	254503.18	168720.03	117615.87	26760.71	272890.44	474084.06	413746.11	257279.95	267838.68	375669.84	313405.96	275943.4	327244.76	696212.18	253771.95	251567.78	251491.25
MW9181	Stearoyl Serotonin	C28H46N2O2	465.3446	442.3559	0.6078	6.7533	1	67964-87-8	--	--	62950.0	1.0	-	-	6232.6	5071.89	2582.28	2774.22	4232.3	4544.15	4897.43	2678.84	484.91	3966.87	9154.45	5453.08	7896.2	11380.97	8146.22	9848.28	12617.7	11685.6	8067.65	4275.16	9197.54	9567.16	9618.94
MW9178	Stearic acid	C18H36O2	303.309	284.2715	0.9143	7.4595	2-MetDNA	57-11-4	HMDB0000827	C01530	189.0	1.0	-	-	64926.55	62561.37	60046.06	40063.24	57193.09	45738.78	54315.48	51371.2	57789.76	50740.97	54249.14	56984.79	39230.66	46352.56	42166.32	47429.03	58148.73	34116.72	35615.51	75469.96	61342.95	62708.98	61218.23
MW9176	Staphidine	C42H58N2O	648.4874	606.4549	0.5896	4.7805	1	59588-15-7	--	C08712	--	1.0	-	-	1235156.72	386133.89	1820214.2	963131.48	788686.23	786750.39	703423.88	741364.04	1683555.18	811445.3	45674.04	59036.57	123861.41	51800.52	41480.94	18603.65	61664.29	423149.89	292910.86	7474.24	272490.66	275241.91	274678.45
MW2585	Stanozolol	C21H32N2O	309.2336	328.2515	0.6495	6.7955	1	--	HMDB0003116	C07311	--	1.0	-	-	21933.05	1428.83	10005.15	10362.01	10039.13	22025.21	6444.78	23088.06	12136.3	18749.49	24196.06	868.41	11110.34	22015.84	19965.64	21799.25	20699.84	21338.27	14634.2	300.02	16228.59	16172.02	16254.78
MW9175	Stanolone benzoate;Dihydrotestosterone benzoate;DHT benzoate	C26H34O3	359.2366	394.2508	0.6288	1.4781	1	1057-07-4	--	C14259	--	1.0	-	-	16662.55	8256.41	12495.53	6751.89	32474.67	7380.34	40208.04	6934.21	23346.46	13978.99	16356.93	13561.74	1578.01	20169.21	15901.18	18768.94	13087.6	5711.09	4307.55	10897.51	13124.03	13386.74	12877.71
MW9172	Sporulenol;(1R,2R,4aS,4bR,6aS,10aS,10bR,12aS)-2,4b,7,7,10a,12a-Hexamethyl-1-[(3R)-3-(4-methylcyclohexa-1,4-dien-1-yl)butyl]octadecahydrochrysen-2-ol	C35H58O	1011.8859	494.4488	0.619	4.5266	1	--	--	C20475	--	1.0	-	-	14294.62	17729.74	18437.19	20274.57	10360.14	10018.47	14128.67	4908.24	13591.75	19982.69	7202.32	10393.64	695.17	7752.21	7797.72	5098.08	14830.18	15883.44	9741.67	3548.48	32655.47	33071.51	33399.81
MW9170	Spironolactone	C24H32O4S	381.1884	416.2021	0.6382	4.4518	1	--	HMDB0014565	C07310	--	1.0	-	-	37220.03	10016.99	37446.14	27516.82	19729.2	37169.74	21528.19	29045.62	10620.42	26308.37	25883.59	14336.21	24730.49	29065.13	20953.61	26306.83	30850.01	31128.18	34755.14	16627.99	13089.39	20490.1	21875.76
MW9169	Spirodiclofen	C21H24Cl2O4	838.2438	410.1052	0.6352	4.3841	1	148477-71-8	--	C18553	72358.0	1.0	-	-	24477.66	37839.26	24501.85	59022.74	11684.19	87855.28	18580.75	67740.93	40123.62	20672.88	5140.67	19577.13	17852.6	3902.74	3726.67	4519.09	4522.98	34763.37	16752.72	12516.28	13753.04	12546.45	13797.64
MW9168	Spiramycin III	C46H78N2O15	898.5368	898.5402	0.5523	13.1509	1	24916-52-7	--	C18844	--	1.0	-	-	1670.33	1196.93	1340.2	1733.18	3660.59	4853.44	5131.76	2665.37	28871.84	34547.76	32767.45	29449.93	25175.31	21579.93	12737.37	13775.01	12580.64	19630.9	12666.25	18064.03	10127.33	15671.36	17126.46
MW2584	Spiramine A	C24H33NO4	415.2604	399.241	0.6396	7.883	1	114531-28-1	--	C08709	--	1.0	-	-	57929.36	100.66	2354.59	6922.26	287.06	16098.58	254.47	11581.62	11710.06	470.16	686.26	10117.19	7909.17	714.38	1216.73	207.53	1207.06	15547.01	1036.29	8941.51	13054.36	13038.75	12888.73
MW9167	Spiraeoside	C21H20O12	465.1021	464.0955	0.725	0.8087	1	20229565	HMDB0037932	--	--	1.0	-	-	44887.25	11606.17	103342.14	88602.48	60869.35	97671.02	59283.71	79865.73	87730.46	73544.35	35897.11	60916.63	7496.46	43296.25	37822.92	45351.74	45202.15	57001.77	46851.55	39172.79	74548.68	75375.92	74514.06
MW9166	Spinosyn B	C40H63NO10	756.4075	717.4452	0.6144	4.8492	1	--	--	C11055	--	1.0	-	-	55041.48	36827.29	92945.47	56255.93	67713.48	69209.05	86488.09	74642.17	87743.01	83101.99	4057.27	3377.09	4437.17	1038.04	885.75	3685.96	2541.3	5790.57	7112.99	635.5	11124.05	10819.78	10779.28
MW9164	Sphingosine Kinase Inhibitor 2	C15H11ClN2OS	378.9474	302.0281	0.6315	4.0689	1	312636-16-1	--	--	64669.0	1.0	-	-	26596.67	86217.3	12367.91	562.41	29013.33	19462.3	21352.05	12669.51	35783.79	3382.48	5263.53	2360.21	861.62	5618.28	288.44	274.56	6739.47	12738.56	18917.75	9631.81	16307.17	16203.19	15180.05
MW9163	Sphinganine	C18H39NO2	344.3351	301.2981	0.9183	10.6235	2-MetDNA	764-22-7	HMDB0000269	C00836	395.0	1.0	-	-	2104.85	421601.7	225175.04	83136.99	209343.04	174609.03	150767.51	185151.69	185758.61	266403.18	248124.44	39188.28	152301.01	172922.9	114191.28	150881.95	56985.43	21177.58	79059.06	83225.72	59882.14	60551.65	54996.71
MW2580	Spectinomycin dihydrochloride	C14H24N2O7.2HCl	441.0613	404.1117	0.5822	4.8181	1	21736-83-4	--	C11619	--	1.0	-	-	3465.75	3109.64	1349.4	3333.41	2475.92	33918.98	3511.25	36037.37	3192.07	28420.77	8331.78	48352.63	450.12	11754.88	10999.43	8553.09	12818.91	7307.84	9917.71	13866.07	16036.11	16014.57	16459.36
MW9161	Spectinomycin	C14H24N2O7	399.1113	332.1584	0.6246	3.7105	1	1695-77-8	HMDB0015055	C02078	2476.0	1.0	-	-	28687.14	1813.98	19280.97	12455.65	13910.39	1868.51	9069.2	2095.01	49026.03	2870.3	283.68	401.77	65.16	565.22	62.44	386.5	487.03	1399.93	778.3	293.95	8572.64	8361.59	7384.73
MW2579	Sparteine	C15H26N2	269.1756	234.2096	0.5689	7.377	1	6160-12-9	--	C10783	44021.0	1.0	-	-	21666.7	34536.63	35436.0	33905.97	39579.99	45600.17	46234.48	34378.71	36321.71	40803.32	32237.98	37767.94	36905.19	36881.62	43492.78	43519.15	31083.25	35046.38	33588.09	35769.06	40378.75	40124.23	40868.97
MW2578	Sparfloxacin	C19H22F2N4O3	411.1645	392.166	0.618	0.7861	1	--	HMDB0015339	C07662	--	1.0	-	-	18372.77	14835.56	11629.88	16896.75	18389.42	13689.94	17196.04	9392.24	14798.35	7541.4	14845.57	36851.08	15780.49	13670.46	13593.73	17171.89	11480.29	11761.51	9849.42	35381.1	16602.45	17003.77	17101.47
MW9160	Soyasapogenol B;24-Hydroxysophoradiol	C30H50O3	505.3869	458.376	0.5407	4.7797	1	595-15-3	HMDB34648	C08980	--	1.0	-	-	87382.44	11654.49	108521.61	67629.59	22964.41	45237.02	38778.65	28296.61	120081.35	56142.83	1773.31	3228.18	5550.07	6143.11	6284.96	5646.95	5930.17	1907.54	2378.26	7581.11	9283.08	8919.33	8831.67
MW2577	Sotalol	C12H20N2O3S	543.2314	272.1195	0.6381	5.0423	1	--	HMDB0014632	C07309	--	1.0	-	-	2784.86	1644.89	2811.58	7451.51	25030.41	24343.01	24153.99	25557.03	4546.38	38267.76	11811.36	303.82	3546.55	10106.16	7908.46	13532.85	8849.8	4449.38	6441.68	6669.21	10289.26	10369.61	10304.63
MW9159	Sorafenib	C21H16ClF3N4O3	541.0059	464.0863	0.6186	1.01	1	--	HMDB0014542	D08524	--	1.0	-	-	14677.42	58972.21	13073.82	23236.59	85192.54	20842.34	96131.53	78539.84	45928.44	71962.04	27186.21	24053.34	36538.8	20930.29	27901.96	21070.4	21554.98	11914.61	19615.75	24027.7	32875.91	33726.81	33730.65
MW9158	Solanocapsine	C27H46N2O2	899.6737	430.3559	0.6036	4.9171	1	639-86-1	--	C10821	--	1.0	-	-	114628.41	6897.41	62097.64	81076.77	54739.68	77729.65	43576.42	68509.94	127594.25	75125.94	2589.61	1936.04	8049.84	1071.74	463.78	3351.65	1839.97	3806.08	2127.9	1390.64	8919.98	8588.04	8338.93
MW2574	Sodium ortho-phenylphenate	C12H9O.Na	383.1031	192.0551	0.6373	4.1617	1	132-27-4	HMDB40464	C19298	--	1.0	-	-	85032.23	48052.03	100595.68	63231.39	49502.75	85124.82	54328.02	73342.39	64387.86	57652.73	104461.43	98833.73	55124.32	113673.38	101323.37	116799.98	114656.8	92149.47	82183.81	116809.88	87570.16	87199.16	87575.53
MW2573	Sodium nitroprusside dihydrate	C5FeN6O.2Na.2H2O	280.908	297.949	0.6394	0.7307	1	13755-38-9	--	C07695	--	1.0	-	-	13905.32	93707.06	61582.87	130117.81	148846.6	130970.66	156023.09	156010.45	75320.63	91539.01	42300.03	32862.21	168749.95	44217.38	42952.77	38283.46	39122.9	44566.61	43288.03	11589.48	52966.29	52971.72	52706.17
MW9154	Sodium lauryl sulfate	C12H25NaO4S	288.1364	288.1371	0.6322	4.4364	1	151-21-3	--	C11166	58284.0	1.0	-	-	2636.05	1154.96	252.56	898.76	198.19	426.18	1191.4	1379.34	3475.01	912.51	18660.4	311.61	19389.43	15516.33	16567.63	13590.95	19878.32	6681.96	485.21	350.16	3647.75	3583.69	3278.74
MW2570	Sodium fluoride	NaF	60.9873	41.9882	0.6334	0.5223	1	7681-49-4	--	C08142	--	1.0	-	-	28700.66	24702.95	18688.24	40417.45	32312.31	37884.47	34102.09	33668.3	29328.01	29720.33	28135.72	59571.06	32203.06	40822.45	33182.64	32958.69	28406.6	31266.37	30370.15	56330.89	31822.26	30933.6	31761.56
MW9151	Sodium cloxacillin monohydrate;Cloxacillin sodium	C19H17ClN3O5S.Na.H2O	542.0121	475.0581	0.608	1.1507	1	7081-44-9	--	C14010	--	1.0	-	-	12734.25	106458.46	69122.09	226461.96	110809.58	94558.95	231789.19	220309.58	155625.41	101752.67	34304.02	40277.49	55308.44	41637.84	39542.71	28310.71	25961.8	14967.1	28997.46	26722.51	38754.58	40857.87	39308.84
MW9149	Sodium chlorate	ClNaO3	106.9505	105.9434	0.6364	0.7185	1	7775099	--	C18765	--	1.0	-	-	34730.58	37361.28	64432.07	55254.26	44863.08	63733.79	25100.01	62891.08	80580.12	36425.13	62747.56	41685.7	47394.44	64647.65	70960.42	63482.79	47259.17	78015.8	82554.18	22611.31	65011.75	64947.0	66030.35
MW9157	Sodium Tetradecyl Sulfate	C14H30O4S	277.1845	294.1865	0.5541	4.186	1	--	HMDB0014607	--	--	1.0	-	-	479653.92	306653.73	171003.36	214273.53	194770.31	223022.77	190887.5	208208.78	167407.73	95612.63	243788.51	328406.26	62351.87	251874.26	216722.67	272991.72	266629.27	198535.75	190343.07	491548.6	262291.67	262286.02	262944.91
MW2566	Sodium 2-O-L-rhamnopyranosyl-4-deoxy-alpha-L-threo-hex-4-eno-pyranosiduronate;Lepidimoide	C12H17O10.Na	365.0469	344.0719	0.6254	2.3337	1	145039-76-5	--	C08241	--	1.0	-	-	39277.83	29899.29	27623.44	27763.76	55914.45	21359.03	60511.53	20339.74	33689.82	25419.76	17358.03	23122.08	2220.82	16912.18	18100.6	21850.23	19259.35	15452.83	20077.5	24119.83	36007.77	36113.92	35878.34
MW2562	Sitaxentan	C18H15ClN2O6S2	470.0234	454.006	0.5285	0.7552	1	--	HMDB0015629	D07171	--	1.0	-	-	24042.19	108487.09	83532.67	131462.47	118221.44	119637.71	123991.16	120552.46	61553.06	104316.87	50357.02	50017.44	74701.25	49306.83	50168.04	49562.2	50751.62	52493.43	52007.18	40641.81	73162.21	75189.3	74849.93
MW9141	Sirohydrochlorin	C42H46N4O16	939.2109	862.2909	0.6212	4.7343	1	65207-12-7	METPA0681	C05778	--	1.0	-	-	80284.02	61060.97	81111.26	83833.49	52384.93	65629.13	58186.29	28684.01	70929.93	44206.67	2851.32	1992.31	837.18	3354.64	3247.39	4829.2	1329.05	15042.99	8633.78	1072.58	6908.76	6792.67	5744.07
MW2560	Sipeimine	C27H43NO3	450.298	429.3243	0.5832	10.4691	1	61825-98-7	--	C10808	--	1.0	-	-	232277.45	3573.22	3587.55	5698.39	2898.1	7224.03	3475.58	4541.22	10448.67	2905.8	49800.91	80543.6	6587.68	26568.57	29131.89	41830.58	48078.43	36876.25	25862.17	56591.0	23472.9	22963.5	23476.09
MW9139	Sinigrin	C10H17NO9S2	757.0314	359.0345	0.6186	1.1213	1	--	HMDB0034070	--	--	1.0	-	-	19481.97	88597.98	66428.53	97712.34	40704.07	88062.17	77455.8	95752.62	61001.03	91582.55	35506.58	43325.31	19862.16	34548.32	34595.68	33992.96	31782.47	24966.41	22569.86	38929.16	53982.31	54624.04	54364.29
MW9138	Sinapoyltartronate	C14H14O9	670.1616	326.0638	0.6454	0.969	1	--	--	C02750	--	1.0	-	-	5835.68	35641.85	24448.04	18517.69	27599.33	13461.22	35139.44	21796.37	13983.12	16788.82	13637.56	21351.75	9154.12	14136.02	13164.52	12775.39	10834.2	15335.67	22189.36	15935.46	19982.62	19378.63	18846.27
MW9137	Sinapoylcholine	[C16H24NO5]+	352.1983	310.1649	0.6209	4.2366	1	--	--	C00933	--	1.0	-	-	2079.55	46088.11	34950.19	13363.55	55186.53	19842.84	22031.04	30023.26	21302.18	14845.42	2228.94	9439.9	19530.31	1461.29	5468.06	2810.94	1151.07	2013.59	3575.01	4268.51	10191.69	10359.1	10388.13
MW2559	Sinapoyl-CoA	C32H46N7O20P3S	957.1548	973.1731	0.9535	2.3252	1	54429-80-0	--	C00411	--	1.0	-	-	75942.87	35201.22	65641.48	61942.71	95196.21	39831.52	102399.33	30332.62	86280.09	54367.45	31227.76	51609.82	220.4	27624.65	25355.17	28584.12	29058.33	42033.87	38989.57	23856.09	64794.14	63985.97	64488.88
MW2558	Silver sulfadiazine	C10H9AgN4O2S	371.9709	355.9497	0.515	4.3737	1	22199082	--	D00433	--	1.0	-	-	51932.02	11567.45	104121.69	38169.17	18968.41	57793.7	22708.35	53096.75	75513.8	59685.33	4895.75	23701.62	3270.74	10044.49	8414.33	6560.61	8367.76	14687.47	20632.03	7799.95	25288.1	24432.17	25449.91
MW2556	Sildenafil citrate	C28H38N6O11S	703.1795	666.2319	0.6037	4.5205	1	139755-83-2	--	D02229	--	1.0	-	-	3536.23	180.29	643.52	740.73	489.95	111.84	692.92	139.35	446.17	221.07	11911.14	4802.34	5028.59	13294.27	12521.52	10863.72	13368.25	2003.21	2229.68	853.68	3758.34	3856.68	3685.28
MW9135	Sialyl-Lewis X	C31H52N2O23	867.3102	820.2961	0.6043	4.7756	1	--	HMDB0006565	--	--	1.0	-	-	54942.47	17904.04	111003.63	40759.18	23571.77	27186.63	30857.82	11724.85	58906.63	71559.24	1496.91	2228.05	9055.08	1005.17	1513.28	1269.02	1468.22	4966.45	3963.68	4035.74	7639.53	7081.48	6583.51
MW9133	Sethoxydim	C17H29NO3S	374.2002	327.1868	0.6049	5.7812	1	74051-80-2	--	C18539	--	1.0	-	-	15514.18	5311.03	23621.99	31483.49	43882.19	47257.21	50096.35	101416.27	90690.93	59897.97	21772.66	3713.12	6069.99	15374.64	26732.54	18048.99	17657.14	11528.83	11064.18	278.7	23767.43	23736.32	24142.64
MW9131	Serratanidine	C16H25NO4	318.1682	295.1784	0.6133	2.4091	1	19637-58-2	--	C09899	--	1.0	-	-	11909.77	7263.22	579.86	438.81	5180.44	7189.63	185.45	387.27	7188.52	746.02	106699.99	247.62	38162.2	75428.13	103937.61	110503.19	65061.4	41048.09	57919.01	33602.62	7383.39	8016.96	8079.66
MW2555	Serine;2-Amino-3-hydroxypropionic acid;3-Hydroxyalanine	C3H7NO3	146.0625	105.0426	0.864	0.8174	2-MetDNA	302-84-1	--	C00716	--	1.0	-	-	286505.66	278320.64	239286.13	261667.42	280808.7	279532.75	274220.29	274133.04	281172.59	206002.13	344821.61	285384.22	337804.06	329722.4	334250.32	356711.46	349579.62	204184.83	202416.3	389010.87	271359.06	272573.27	273546.0
MW9130	Sergeolide	C25H28O11	1031.3168	504.1632	0.6176	13.1245	1	82290-17-3	--	C08782	--	1.0	-	-	738848.55	642613.4	550293.68	574594.89	107520.63	99579.28	103178.55	104534.83	128379.05	119887.64	95607.25	109696.05	119909.81	137774.92	92606.87	127894.14	148737.58	116372.87	85654.05	48711.63	88370.23	93969.42	78491.79
MW9102	Ser-Thr-OH	C13H16N2O8	346.1248	328.0907	0.6289	1.0869	1	--	--	--	65117.0	1.0	-	-	5573.77	19864.43	49288.35	29395.77	55213.02	28199.13	31469.81	31248.77	12727.29	34637.08	16203.49	16941.31	29975.88	16607.08	13883.8	15813.28	13223.37	11591.91	14240.23	10896.43	19916.97	20154.77	20115.82
MW2551	Ser Val Gln Glu Ser	C21H36N6O11	529.2268	548.2442	0.6229	4.2219	1	--	--	--	264450.0	1.0	-	-	4388.34	889.16	332.82	676.6	996.67	1857.96	2278.94	1850.9	1169.56	1989.98	22574.57	13853.32	64445.18	22756.05	21744.65	22951.42	27838.93	8744.26	8376.05	10550.97	15059.99	15448.66	15437.03
MW9129	Ser Tyr Lys Asp	C22H33N5O9	1023.4598	511.2278	0.558	4.4934	1	--	--	--	231241.0	1.0	-	-	37856.38	57329.27	30751.02	54572.94	29880.13	22518.43	28402.9	33814.9	22082.1	27809.7	7283.13	14164.45	3741.23	11889.22	10568.69	13767.96	6993.68	15215.72	13401.84	10235.05	16131.09	15203.71	14812.36
MW9128	Ser Tyr His Asp	C22H28N6O9	567.2054	520.1918	0.6061	4.7978	1	--	--	--	231201.0	1.0	-	-	59438.67	28481.28	107010.2	65160.55	38099.39	36117.71	32836.26	28231.35	42323.31	42851.96	1081.5	3568.81	3480.17	2118.39	697.76	732.93	1932.41	8872.9	3485.11	901.81	6656.55	6780.77	6809.25
MW9127	Ser Trp Gln	C19H25N5O6	458.1334	419.1805	0.5799	4.7333	1	--	--	--	15819.0	1.0	-	-	573187.15	1093393.24	300571.67	545058.41	801358.79	594978.9	1091651.96	429000.62	719228.01	359217.57	95990.52	5329.7	229501.18	95918.85	4780.96	75120.81	100976.34	154021.54	128507.2	224949.93	25898.05	25126.8	25674.17
MW2549	Ser Trp Asp Pro Phe	C32H38N6O9	671.2418	650.27	0.5243	0.8507	1	--	--	--	264809.0	1.0	-	-	15749.97	20327.99	16480.55	17701.29	19756.31	13976.87	27249.41	13877.56	9676.85	9154.42	4062.21	16974.32	2183.66	7135.71	3325.25	4000.21	4664.85	5468.15	4652.97	11324.2	10305.65	10454.23	10533.53
MW2548	Ser Trp	C14H17N3O4	581.2363	291.1219	0.6378	10.8663	1	94421-70-2	--	--	23978.0	1.0	-	-	114741.2	5049.06	6319.44	5634.42	4518.0	7441.8	5436.26	5436.87	6890.59	2601.14	74777.73	107581.46	11042.06	68383.57	59379.41	109211.61	121711.97	101637.16	67517.38	139038.44	46079.4	45247.57	43818.65
MW9126	Ser Thr Thr Ala Val	C19H35N5O9	993.4505	477.2435	0.6402	4.5351	1	--	--	--	264155.0	1.0	-	-	26451.42	18046.47	25378.07	44256.29	39022.17	27177.82	43804.15	22480.25	67645.45	32324.6	2905.1	16329.93	7183.7	14429.02	12563.29	12566.9	8354.93	3149.31	7881.21	11004.89	12145.86	11720.3	11643.07
MW2547	Ser Ser Gly	C8H15N3O6	497.184	249.0961	0.5971	0.9428	1	--	--	--	18338.0	1.0	-	-	31107.37	17056.37	15801.39	15656.93	23512.52	15216.22	20369.67	16875.25	13085.32	13286.23	12691.09	13042.55	5255.01	5772.74	4655.97	10498.24	4065.53	4927.5	10864.49	6567.04	12996.08	14243.94	14107.19
MW2546	Ser Pro Asp	C12H19N3O7	354.0718	317.1223	0.582	0.9629	1	--	--	--	17571.0	1.0	-	-	2319547.53	2477603.11	707261.99	1799107.51	2850116.68	1619639.94	2862786.61	1681598.99	1592563.02	1216817.01	705254.27	1688599.68	555563.37	361329.46	701430.65	675614.24	585455.83	247445.59	246988.37	1962648.6	1653253.5	1729325.59	1714030.58
MW9122	Ser Pro Ala Ile Asn	C21H36N6O8	518.2935	500.2595	0.8908	3.6947	1	--	--	--	264145.0	1.0	-	-	6331.99	9812.19	24736.67	21626.15	25759.9	38446.85	25284.2	28943.53	16594.47	17953.38	330880.5	3784.74	829790.67	298401.72	353363.3	378014.15	300898.79	235780.15	237366.23	157079.37	109325.39	110457.67	109039.65
MW9121	Ser Phe Val Lys	C23H37N5O6	479.2734	479.2744	0.6165	5.0174	1	--	--	--	225427.0	1.0	-	-	21224.37	7695.93	6736.48	15196.42	47241.83	53588.63	49688.59	43985.28	9055.69	94564.48	37533.36	2361.0	6441.87	37962.23	36820.13	106624.12	73172.15	33035.13	34852.19	445.57	29695.73	29238.7	30136.51
MW2544	Ser Lys Asp	C13H24N4O7	364.1844	348.1645	0.6033	5.7664	1	111245-28-4	--	--	21297.0	1.0	-	-	170211.99	23826.8	11706.33	43135.11	42709.76	78026.62	41261.37	65720.24	28127.46	58092.85	122720.08	29423.28	130766.67	122418.56	107959.54	123744.41	136745.34	149896.86	153042.08	26396.74	98511.38	98793.52	97375.0
MW9120	Ser Leu Pro Tyr Ala	C26H39N5O8	514.2655	549.2799	0.62	4.1856	1	--	--	--	264685.0	1.0	-	-	41304.95	48144.84	63115.94	46053.0	62191.24	25356.11	31758.51	23237.43	40911.63	13266.29	45086.53	48042.96	2058.52	48692.22	60865.35	62175.27	49371.91	53764.4	44564.8	51920.12	82933.05	82962.65	81676.66
MW2543	Ser Leu Lys Glu	C20H37N5O8	474.2527	475.2642	0.5084	5.0365	2-search-DB	--	--	--	227242.0	1.0	-	-	1995365.18	188922.62	695838.6	1248979.95	3692696.87	4002555.38	3705443.86	3900867.06	827180.68	6061514.91	2039173.51	83861.78	717055.7	2024953.51	2017839.9	2032199.9	2057045.18	1247074.22	1283436.09	39155.4	1933473.04	1936337.93	1933237.39
MW9119	Ser Ile Tyr	C18H27N3O6	448.1434	381.19	0.6444	0.7711	1	--	--	--	15945.0	1.0	-	-	91416.44	39978.29	67061.68	29863.95	19968.26	49608.69	37833.76	33109.47	36173.72	36017.95	26104.53	32608.78	1184.04	23678.06	27094.34	13789.88	21324.57	18274.08	25971.4	12102.76	47690.35	44167.61	45094.2
MW9117	Ser Ile Asn Lys	C19H36N6O7	461.2732	460.2645	0.5643	8.3236	1	--	--	--	226507.0	1.0	-	-	8265.67	8727.41	3610.5	16499.74	52276.11	20899.52	13317.61	17336.85	7035.21	14629.47	7610.16	4946.35	11195.8	6177.0	9685.64	7562.18	7058.01	5625.15	4974.2	9985.03	12063.21	12645.39	12547.6
MW9116	Ser Ile Arg Arg	C21H42N10O6	513.3251	530.3289	0.6184	4.6014	1	--	--	--	226573.0	1.0	-	-	60649.99	113212.68	19183.96	152817.71	105195.3	65833.53	96525.92	60925.27	21492.58	34951.83	8799.0	1451.59	35883.06	10243.72	12881.67	798.2	12161.55	899.72	694.58	28143.33	19727.8	18061.3	11606.99
MW2541	Ser His Thr Arg	C19H33N9O7	534.2148	499.2503	0.6313	9.9773	1	--	--	--	226213.0	1.0	-	-	83463.4	2878.57	1247.7	1862.13	1020.12	4827.84	2290.21	1898.62	5093.38	1828.88	11016.31	20635.48	4076.11	14575.73	5355.03	18218.27	26293.75	2778.24	1999.26	35565.86	4286.71	4759.08	4501.7
MW2540	Ser Gly Tyr	C14H19N3O6	344.1263	325.1274	0.6497	4.2281	1	--	--	--	15694.0	1.0	-	-	30635.37	58565.69	46899.41	40028.92	41384.88	39790.35	45401.21	37242.29	38202.44	36140.75	33410.07	1643.27	6187.08	20320.78	30738.69	29750.53	29606.98	31361.05	51585.46	5134.45	26167.73	25761.8	25665.76
MW9114	Ser Gly	C5H10N2O4	207.034	162.0641	0.5512	1.5355	1	--	--	--	24039.0	1.0	-	-	33730.75	207867.78	134380.05	140171.23	123900.83	120645.12	142348.19	136700.27	112924.34	118893.37	111956.13	94453.45	21803.39	101743.42	82530.89	59448.4	64610.35	152280.36	167471.58	51957.95	108444.38	110758.88	110927.39
MW2539	Ser Glu Val Lys Met	C24H44N6O9S	613.2627	592.289	0.5978	9.6036	1	--	--	--	264699.0	1.0	-	-	68070.28	1870.58	2460.2	2504.38	630.06	3623.89	937.64	3386.3	2626.07	2239.93	24894.59	15181.9	20960.54	24437.44	25400.15	34950.08	31123.06	13264.97	9208.77	24304.27	13155.25	15162.32	14722.23
MW2538	Ser Glu Tyr Glu	C22H30N4O11	542.2108	526.1911	0.6293	5.8151	1	--	--	--	225062.0	1.0	-	-	26994.98	3301.56	24577.48	15897.1	64592.0	66004.73	82185.83	59256.01	49952.33	173324.03	57402.63	1582.82	17378.83	48536.31	58629.92	53275.43	48925.93	23820.41	45790.96	29675.78	48485.21	48398.98	47596.8
MW2537	Ser Glu Ser Asp Ile	C21H35N5O12	586.1747	549.2282	0.7942	4.5852	1	--	--	--	264163.0	1.0	-	-	108308.22	62726.26	99994.71	83262.18	66745.08	74423.65	69312.06	69020.68	63736.65	62761.65	48107.65	67233.38	48739.0	45988.06	47313.98	45275.12	47493.83	80305.51	83119.82	59532.97	75444.13	74877.35	75419.92
MW9112	Ser Glu Lys Arg	C20H38N8O8	260.1486	518.2813	0.6727	2.4723	1	--	--	--	224853.0	1.0	-	-	7081.44	8634.4	5032.85	5299.8	5003.52	9239.64	2856.89	2813.57	4891.15	5272.86	160628.21	148891.72	524948.42	153039.02	158345.65	170768.46	139208.15	75584.19	50382.14	133051.05	94601.72	95340.38	94889.55
MW2536	Ser Glu His	C14H21N5O7	387.1635	371.1441	0.6441	0.8423	1	--	--	--	16613.0	1.0	-	-	38654.27	50426.27	17497.99	38614.68	62571.91	37202.2	52397.59	35474.52	45544.84	39612.5	15243.76	39446.01	14631.26	22467.53	20819.47	16851.18	24484.05	18162.66	12855.36	72071.74	34921.22	34941.42	34769.58
MW2535	Ser Glu Glu Glu Ile	C24H39N5O13	586.2366	605.2544	0.6485	4.3663	1	--	--	--	264762.0	1.0	-	-	6539.1	712.73	680.15	483.78	5405.68	480.14	4092.32	124.56	9467.43	4061.9	4297.66	14848.91	23002.48	6749.26	5121.89	10104.1	13651.28	21943.94	12882.71	16113.43	11777.65	12219.39	12316.09
MW2534	Ser Gln Tyr Lys	C23H36N6O8	561.2087	524.2595	0.6164	0.8026	1	--	--	--	229067.0	1.0	-	-	125383.1	181115.19	107905.28	136584.96	161886.51	81211.6	125659.75	84778.33	86919.97	87610.16	47886.16	94449.56	30760.71	49349.69	43886.75	46706.69	55525.72	47551.22	56245.29	102077.39	88396.01	88451.11	88194.61
MW2533	Ser Gln Phe	C17H24N4O6	379.1623	380.1696	0.6487	4.3154	1	--	--	--	16334.0	1.0	-	-	599.06	108.43	416.36	1835.69	71.4	2219.28	430.92	2518.59	86.2	301.33	17830.95	7147.18	23185.15	21183.55	20656.2	20379.98	22530.27	3726.15	3947.51	13429.65	9834.86	9812.55	9863.59
MW9110	Ser Gln Leu Lys	C20H38N6O7	516.3133	474.2802	0.6072	1.1285	1	--	--	--	228867.0	1.0	-	-	3504.82	1205.26	1554.32	172.38	1895.26	1504.04	803.52	148.82	261.55	1965.47	4619.87	2893.1	10776.25	4678.28	4660.14	5185.16	5046.59	4529.38	4392.24	4176.39	7468.61	7583.08	7612.91
MW9109	Ser Gln Asp Val Ser	C20H34N6O11	1086.4893	534.2286	0.6015	5.1896	1	--	--	--	264475.0	1.0	-	-	268698.09	455020.4	278464.3	372989.07	303625.25	216743.83	280822.0	237450.4	266266.85	199487.01	130030.1	86607.81	45210.78	87341.31	88681.91	85186.49	81624.55	89892.31	109265.81	68305.05	221647.0	221610.09	211967.26
MW2530	Ser Asp Ile Glu Val	C23H39N5O11	582.2377	561.2646	0.5642	10.8672	1	--	--	--	264084.0	1.0	-	-	29232.63	2743.67	2542.4	2483.8	1412.29	3651.8	1619.35	1179.48	2028.04	1404.66	32461.18	36962.2	2993.36	27392.78	24626.76	39289.96	44279.55	29773.81	21354.82	53590.89	10358.97	9930.19	9303.34
MW2529	Ser Asp His Arg	C19H31N9O8	550.1779	513.2296	0.6348	0.826	1	--	--	--	224413.0	1.0	-	-	293451.3	231131.92	214275.78	325977.54	393688.46	256970.95	394476.96	275707.51	315117.09	250311.28	110787.61	246961.94	171039.0	94047.73	148798.48	144139.98	91505.8	57590.68	72719.97	219475.62	176254.75	176535.4	178441.2
MW9105	Ser Asn Ser	C10H18N4O7	635.2237	306.1176	0.615	4.7858	1	--	--	--	15777.0	1.0	-	-	130237.69	77861.37	158978.38	177708.23	167323.73	229361.23	146341.65	205060.95	221123.84	245355.83	1272.76	6532.64	46866.53	10606.79	8483.21	2457.38	667.34	9288.46	8803.71	23366.09	42313.88	40418.03	40727.49
MW2527	Ser Arg Tyr Glu	C23H35N7O9	552.2548	553.2496	0.7143	7.078	1	--	--	--	229462.0	1.0	-	-	26617.45	40475.58	49485.09	31419.88	26936.39	32403.15	29376.73	27024.62	37547.3	27986.09	49374.99	43897.88	46238.41	40542.36	41976.35	46434.17	45307.01	35573.53	42103.33	41194.29	42916.79	42591.76	42661.47
MW9104	Ser Arg Ser	C12H24N6O6	349.1843	348.1757	0.5212	4.4767	2-search-DB	--	--	--	21469.0	1.0	-	-	6319.58	1069.47	705.22	1066.39	2209.33	519.99	2736.05	2660.23	1604.01	2025.09	656.98	536.35	3667.9	1405.12	857.66	1067.03	429.39	2454.77	1124.64	646.22	5389.62	5437.72	5484.01
MW2526	Ser Arg Phe Lys	C24H40N8O6	555.3082	536.3071	0.5337	3.821	1	--	--	--	229167.0	1.0	-	-	110135.26	30639.3	9437.13	32756.4	24410.52	24620.15	25364.61	22516.05	18050.84	4772.81	2133.03	73527.87	23335.57	330.76	249.51	955.7	1760.58	13684.78	14728.3	15442.99	22084.26	22432.88	22627.03
MW9103	Ser Arg His	C15H26N8O5	462.2179	398.2026	0.6128	3.8929	1	--	--	--	17750.0	1.0	-	-	536.19	73.94	153.96	304.7	49.99	143.57	1995.41	112.26	230.56	177.6	44080.72	30296.29	29872.61	41677.9	38591.16	47840.25	43706.78	4604.5	3444.78	58369.99	18382.38	18428.03	18487.9
MW2525	Sempervirine cation	C19H17N2	545.2708	273.1392	0.6331	9.8156	1	6882-99-1	--	C09240	--	1.0	-	-	1326601.89	141467.9	31056.73	53737.06	20633.53	36896.03	22114.5	34071.77	305395.55	25007.56	53473.95	90092.13	166866.31	56306.57	45591.89	64427.62	62060.96	10211.06	3201.83	79855.82	67645.44	67642.08	67563.84
MW2524	Semicarbazide	CH5N3O	96.02	75.0433	0.5068	1.2615	1	4426-72-6	--	C02077	--	1.0	-	-	27589.07	23556.39	23120.53	34247.09	46468.1	24332.61	33331.82	12199.79	121303.1	19852.66	19924.77	32847.75	46982.78	19319.02	17305.23	20653.93	20281.63	13819.3	37642.76	42338.46	23321.14	22489.99	23605.4
MW9100	Selenophosphoric acid;Selenophosphate	H3PO3Se	162.9069	161.8985	0.7197	13.1841	1	--	HMDB03840	C05172	--	1.0	-	-	104689.48	108470.48	104066.61	104676.21	96111.69	98036.17	96883.0	100455.12	87485.46	74403.24	54524.72	61322.04	70068.32	74399.52	64126.46	71300.07	70189.33	66995.51	67638.17	59656.15	70018.13	65625.44	63333.23
MW2522	Selenomethionine Se-oxide	C5H11NO3Se	424.9738	212.9904	0.6296	1.4408	1	--	--	C05708	--	1.0	-	-	15414.56	2805.79	16271.62	16500.95	2099.71	18519.91	431.43	1693.26	26872.06	13014.23	16662.54	16164.63	31522.63	29157.84	19097.12	34945.94	38469.31	122090.1	81352.02	8712.67	26995.6	28247.64	28611.75
MW9097	Selenocysteine seleninic acid;Selenocysteine seleninate;3-Seleninoalanine	C3H7NO4Se	218.9879	200.954	0.6483	1.3459	1	--	--	C05705	--	1.0	-	-	27563.31	3958.85	30885.52	10230.17	4489.34	10336.41	4782.75	5874.56	35314.89	4018.35	27871.9	22125.61	3391.06	45873.6	22592.26	40680.76	40920.12	93580.97	146043.02	10847.9	31977.77	30594.19	31636.84
MW9094	Sedoheptulose 7-phosphate	C7H15O10P	356.9935	290.0403	0.6433	1.8262	1	2646-35-7	--	C05382	3418.0	1.0	-	-	74164.69	56466.96	155757.33	128695.57	64012.83	215901.24	64502.7	116420.06	142304.01	189168.0	58838.8	165850.93	39806.45	103019.18	168743.52	158816.6	89024.45	248190.41	228533.37	186583.08	157713.12	160631.68	157892.86
MW2519	Secobarbital	C12H18N2O3	475.2565	238.1317	0.6285	6.3385	1	--	HMDB0014562	D00430	--	1.0	-	-	94481.24	4333.38	23485.75	38155.49	75181.25	105576.82	98690.19	97727.44	15173.0	141503.02	55421.32	1746.4	6497.25	70196.73	53460.2	55202.8	53028.25	32539.23	37491.33	31052.67	62798.1	61024.85	61109.57
MW9093	Secbumeton	C10H19N5O	248.1477	225.159	0.6095	4.4437	1	26259-45-0	--	C19106	72848.0	1.0	-	-	110590.28	130492.83	97373.25	66690.5	123352.17	90768.25	119653.02	86202.37	133123.41	89329.09	20156.92	59753.18	32819.69	12958.25	20728.27	18450.19	34165.02	34625.71	20505.86	69816.59	68758.95	68438.27	67706.39
MW9092	Se-Adenosylselenomethionine	C15H23N6O5Se	302.041	447.0895	0.588	1.5609	1	--	HMDB11118	C05691	--	1.0	-	-	135691.71	81132.31	116290.63	125334.96	51097.16	131830.44	38276.29	330994.72	216220.75	172992.1	107087.06	95455.75	134283.82	99930.91	98101.38	113203.22	139574.84	288181.24	151100.48	12929.39	155833.79	152299.62	136128.91
MW2518	Scutellarein	C15H10O6	322.9961	286.0477	0.6361	4.1316	1	529-53-3	--	C10184	--	1.0	-	-	11548.98	41132.35	91816.55	58850.98	57093.53	113933.12	57868.5	127011.5	59246.69	42949.58	1252.52	2995.48	27655.52	1779.91	2666.42	4211.26	5071.99	4524.27	14803.61	9487.52	3993.13	3829.0	4017.54
MW9091	Scriptaid	C18H18N2O4	393.0798	326.1267	0.634	0.7501	1	287383-59-9	--	--	64766.0	1.0	-	-	70935.07	2815.55	8372.62	5734.01	9261.94	6342.1	9267.63	8900.31	9253.55	39783.61	10095.33	10289.04	5498.92	10493.86	8869.04	15058.44	9877.42	10337.9	10221.15	12341.59	16261.25	16032.44	15966.4
MW2517	Scorpioidin	C16H20O4	257.1176	276.1362	0.5962	0.786	1	76045-40-4	--	C09548	--	1.0	-	-	5095.33	2121.31	683.69	2117.76	656.31	3854.5	1242.25	3294.53	1325.98	1059.89	13593.19	13102.31	1162.0	12661.11	11926.83	12503.44	11117.61	3858.62	3899.35	18883.76	5938.59	5957.2	5719.86
MW2516	Scabraside	C40H44O20	799.2619	844.2426	0.7701	4.2444	1	87686-79-1	--	C17918	--	1.0	-	-	177448.69	5532.8	51871.98	29443.85	46068.19	2176.47	47212.63	2344.2	226766.47	5701.32	6295.46	182.24	22129.03	223.78	811.46	227.6	4398.95	5257.56	5067.67	111.76	33528.26	33129.85	33686.28
MW9086	Sativanine B	C30H38N4O4	519.2961	518.2893	0.6167	3.71	1	72361-60-5	--	C10013	--	1.0	-	-	833.49	740.43	555.78	1214.96	2083.03	2648.36	1545.52	1299.1	613.02	1131.44	65652.22	641.91	160554.32	63658.1	63148.98	57884.5	59352.34	48513.92	40863.5	40675.43	23150.55	21707.04	22539.87
MW9085	Sarothralin	C31H34O8	517.2218	534.2254	0.6329	3.8324	1	96624-40-7	--	C09969	--	1.0	-	-	1644.8	2173.26	498.4	1057.32	669.34	418.88	745.02	232.97	558.11	103.21	231.78	5624.28	43543.51	108.08	41.57	71.39	63.35	347.84	1213.21	33.03	3916.14	3923.2	3920.1
MW9084	Sarin	C4H10FO2P	204.056	140.0402	0.6468	0.8213	1	107-44-8	--	C11764	--	1.0	-	-	150288.69	50370.45	232830.64	104700.33	42986.78	172367.65	51482.71	176886.22	141681.41	256168.56	142860.35	62596.39	313836.77	149433.76	137621.65	153512.41	142365.13	364199.64	380994.81	22016.64	153236.75	150915.54	153206.25
MW9083	Sarcoaldesterol A;(3beta,5alpha,6beta,11alpha)-Gorgostane-3,5,6,11-tetrol	C30H52O4	991.7319	476.3866	0.519	4.6593	1	--	--	C19656	--	1.0	-	-	2012.07	1952.19	575.57	1143.0	778.18	1315.31	669.26	990.43	855.67	510.38	8537.6	11046.86	3731.21	12755.15	10391.09	8589.77	12555.4	10244.35	4847.1	6321.64	11681.0	11803.69	11691.77
MW9081	Saphenic acid	C15H12N2O3	286.1189	268.0848	0.6329	2.0507	1	--	--	C12117	--	1.0	-	-	1505.69	103.94	371.96	455.94	407.47	490.65	403.31	134.43	111.86	247.01	7193.68	130.79	10102.41	10388.93	11819.48	8787.16	9158.63	533.01	573.28	152.16	1280.19	894.72	1365.21
MW9080	Sapanisertib	C15H15N7O	354.1051	309.1338	0.6479	4.576	1	1224844-38-5	--	D11183	--	1.0	-	-	1445.93	462.88	228.34	873.84	994.27	179.21	188.73	450.03	871.47	395.02	15236.16	2241.03	3967.54	13454.66	10790.05	12843.15	10368.5	3603.78	531.18	735.54	2703.28	2673.29	2626.52
MW2512	Santiaguine	C38H48N4O2	611.3766	592.3777	0.649	10.6756	1	528-31-4	--	C10170	--	1.0	-	-	327986.84	648064.23	502700.87	501093.04	422552.29	1165070.68	334914.9	653891.81	560593.32	1176661.15	268647.44	279054.02	608260.37	529896.3	225208.75	543244.81	278339.8	360981.61	332695.37	355423.4	767865.56	726928.39	712581.3
MW9079	Sanguilutine	C23H24NO5	509.0395	394.1654	0.5934	1.253	1	--	--	C12228	--	1.0	-	-	11486.44	34594.94	13449.8	24139.73	16564.58	35523.26	25713.25	16815.08	16792.98	790.78	4952.3	10812.74	9601.85	4444.85	2737.1	5717.75	7210.51	3500.1	4706.84	13589.67	15465.55	16206.89	15886.09
MW2511	Sanggenon E	C45H44O12	811.2588	776.2833	0.6194	1.2038	1	81381-69-3	--	C17871	--	1.0	-	-	36327.71	14058.03	23802.4	4699.01	7636.0	10934.92	9071.16	10584.9	8994.94	4647.49	32044.68	28665.23	15554.57	34436.67	35680.03	32879.07	31268.76	21560.51	28887.26	9611.69	20974.41	21635.07	21759.84
MW9078	Sanggenon C	C40H36O12	708.2208	708.2207	0.624	4.6009	1	80651-76-9	--	C09834	--	1.0	-	-	128688.79	70204.16	112583.25	3522.68	11811.35	3938.46	40099.96	5737.27	77320.73	19772.21	949.39	5540.21	5291.04	1396.86	2278.93	4163.79	1652.98	6326.45	4367.92	925.0	2382.12	2522.45	2549.01
MW9077	Sanggenon B	C33H30O9	617.2024	570.189	0.6208	4.3229	1	81381-67-1	--	C17870	--	1.0	-	-	1019.02	931.63	541.15	1275.93	401.96	886.98	522.95	647.97	150.25	60.83	531.43	8330.95	406.26	878.56	291.84	574.18	1011.35	6638.12	3555.98	6636.51	6271.12	6288.64	6246.06
MW2509	Salvarsan;Arsphenamine	C12H12As2N2O2.2HCl	436.8784	437.8864	0.5969	8.2578	1	139-93-5	--	C11744	--	1.0	-	-	29661.63	38822.29	40628.01	39445.12	42739.14	45278.4	43550.49	47639.46	50787.02	35552.56	39453.29	48075.9	28023.19	33878.3	37267.59	41787.92	39065.63	33515.03	33023.09	36846.13	37890.79	36254.96	33378.42
MW9076	Salmeterol	C25H37NO4	530.1464	415.2723	0.6	4.0686	1	--	HMDB0015073	C07241	--	1.0	-	-	7284.83	1601.19	858.47	4300.76	956.96	2382.31	451.32	690.55	412.92	257.12	45943.99	39508.09	10109.87	36224.98	34048.61	38433.83	37461.68	32460.57	34114.18	47840.51	22922.93	23147.06	22158.37
MW2508	Salithion	C8H9O3PS	214.9871	216.001	0.5533	2.4833	1	3811-49-2	--	C18981	--	1.0	-	-	402507.49	485376.61	350768.86	309142.66	674249.68	541705.55	517954.03	570739.49	324565.33	391297.33	279385.57	309914.49	178230.61	226856.07	243292.2	257624.72	232213.06	359040.18	366759.55	436264.92	258729.87	258114.51	264872.6
MW9074	Salicifoline	C12H20NO2	274.1655	210.1494	0.8745	2.739	1	6882-07-1	--	C17063	--	1.0	-	-	2167154.84	710642.9	701563.94	1450341.54	849555.99	834402.63	741655.02	600808.0	445910.08	425845.74	1516055.16	1228344.67	662711.98	1611032.05	1406591.61	1626591.27	2044270.25	1730903.32	1501963.27	1350575.09	1254509.7	1244338.03	1232378.2
MW2507	Sakuranin;NSC 407308	C22H24O10	485.083	448.1369	0.5018	2.3957	1	529-39-5	--	C17391	--	1.0	-	-	117126.88	74955.49	75649.82	81958.99	240643.96	77103.46	173387.59	81381.43	135835.75	68488.3	16614.56	57256.06	1917.84	13153.62	12160.84	12687.68	17299.79	49820.76	27181.82	36262.9	69658.02	71052.2	64979.55
MW9071	Safranin;C.I. Basic Red 2	C20H19N4.Cl	414.1451	350.1298	0.6087	4.2779	1	477-73-6	--	C19919	--	1.0	-	-	468530.76	268976.05	465177.86	341042.69	278680.49	355858.73	274850.35	322764.7	360218.94	344867.78	317918.09	391843.17	195042.3	332517.85	296765.31	319837.82	343862.74	424487.38	396344.2	431860.2	348583.21	349925.73	349821.05
MW9069	Saccharopine	C11H20N2O6	300.1199	276.1321	0.6893	1.6864	2-MetDNA	997-68-2	HMDB0000279	C00449	383.0	1.0	-	-	73134.1	43220.56	93401.13	110675.55	79995.03	109394.91	73339.23	103140.81	100886.12	112720.52	50928.5	10231.14	19155.68	19092.8	16784.43	22700.47	28171.47	43398.85	55888.26	8263.05	62510.54	62724.96	62831.7
MW9191	SU 11652	C22H27ClN4O2	491.1017	414.1823	0.6304	4.9175	1	326914-10-7	--	--	45563.0	1.0	-	-	108273.7	7664.45	50875.83	40922.22	25196.34	37415.64	32430.68	44740.36	79387.83	39197.52	11283.17	1559.9	3323.0	11155.42	11341.92	8737.08	1235.43	4487.11	1455.22	11278.77	6384.25	6619.26	6596.5
MW2596	STS-135	C24H31FN2O	353.2013	382.242	0.7474	13.2247	1	1354631-26-7	--	--	85218.0	1.0	-	-	29932.3	53883.22	19922.05	37565.68	23989.89	25204.53	28030.48	35341.01	29781.73	33150.16	106399.83	145170.7	115155.99	92160.23	146630.79	127157.7	182019.96	198802.62	381663.36	242630.71	77422.63	109826.17	100574.18
MW9189	STROPHANTHIDIN SEMICARBAZIDE	C24H35N3O6	576.1278	461.2526	0.6407	1.284	1	--	--	--	44254.0	1.0	-	-	9848.74	102122.96	44418.56	39247.94	140420.11	121820.28	155031.03	120418.66	81092.17	86605.12	41658.77	48906.75	12881.63	35630.22	39736.18	33203.98	33001.88	30805.53	42591.09	2217.07	28281.22	28604.46	29885.66
MW2588	STF-62247	C15H13N3S	283.1029	267.083	0.6061	1.6772	1	315702-99-9	--	--	45454.0	1.0	-	-	4131.34	6013.62	16209.27	12370.55	4379.42	15049.37	4647.41	10241.39	14997.04	20239.04	22388.07	3707.06	26572.73	28801.97	31788.73	28035.21	29112.46	40242.08	29430.37	2986.01	12420.25	13566.9	13672.97
MW9177	STATIL	C17H12BrFN2O3	408.0344	390.0015	0.574	1.1118	1	727029-95-5	--	D03806	44298.0	1.0	-	-	21099.29	73616.53	93638.25	49152.33	55963.0	82958.68	68287.01	93788.3	43427.36	125134.52	104067.62	95215.99	116043.53	106840.9	112043.58	84343.02	82634.76	92739.81	67568.15	57664.61	74887.18	74841.49	75135.22
MW9174	SR 1001	C15H13F6N3O4S2	519.0594	477.0252	0.6213	4.1935	1	7440-24-6	--	--	96471.0	1.0	-	-	158526.44	125702.0	75534.95	191451.5	72214.91	191220.54	70871.92	169057.08	32284.46	79430.1	1863.94	178446.83	1884.79	3197.93	2119.96	4418.17	2124.85	137849.45	120140.41	56904.31	125598.44	125267.87	122174.31
MW2564	SN-38 carboxylate form	C22H21N2O6	408.1278	409.14	0.6416	1.4697	1	--	--	C11366	--	1.0	-	-	15644.17	4924.07	2769.94	6015.82	9246.98	5483.1	5730.78	8205.75	4666.59	4021.48	11917.8	3417.89	919.56	9994.89	7994.41	12495.11	11622.5	5289.48	10711.06	7854.64	10592.08	10591.96	10496.88
MW9144	SM-17466	C20H21N4O5S2	528.0481	461.0953	0.6201	1.1421	1	--	--	C12018	--	1.0	-	-	173207.58	354048.55	223293.38	366050.08	295372.6	306552.54	308945.25	287641.22	232173.86	107813.96	42744.25	134368.4	66029.36	125438.39	116502.95	121017.14	123696.35	82862.82	77528.14	181226.97	132967.38	141383.8	124781.77
MW2563	SLF	C30H40N2O6	540.3074	524.2886	0.6164	13.2179	1	--	--	--	64652.0	1.0	-	-	25876.02	8504.39	4927.4	15087.55	3275.55	73707.95	3159.68	59827.9	5000.61	79245.45	57761.32	18606.07	190743.65	90828.83	63013.4	66882.97	100130.65	144876.41	120165.53	2597.19	53286.19	51243.26	53532.36
MW9142	SK&F 91581	C8H14N4S	181.0918	198.0939	0.562	3.2138	1	34970-65-5	--	C11799	--	1.0	-	-	123762.3	7637.43	71136.42	124202.25	98180.27	165509.34	100885.6	158495.18	103940.01	107917.26	2562.67	8642.12	3611.47	2123.51	3540.37	3732.53	4375.47	8055.84	7814.68	4019.22	55994.17	56768.57	56791.34
MW2552	SERICETIN DIACETATE	C29H28O7	525.1308	488.1835	0.5716	1.5669	1	--	--	--	43609.0	1.0	-	-	72135.42	59476.11	63247.6	506.33	68098.6	68124.05	66651.89	69383.92	62534.98	77368.79	242779.27	825.86	86647.06	211693.82	257860.81	237867.74	283982.67	9674.46	24841.91	9062.01	85526.89	85846.15	86738.33
MW2523	SELINIDIN	C19H20O5	347.1298	328.1311	0.6391	1.237	1	--	--	--	43881.0	1.0	-	-	358339.7	531554.48	875188.89	409467.27	1642682.09	347577.61	1642210.85	375249.7	1094244.5	771178.46	337193.19	779946.8	97659.13	354242.63	121130.81	316907.32	342685.37	88347.22	487300.28	871978.57	514420.15	424560.3	513586.19
MW9095	SELAMECTIN	C43H63NO11	792.4303	769.4401	0.6132	4.0747	1	165108-07-6	--	D05813	44365.0	1.0	-	-	62846.19	101543.72	53473.47	95237.41	15273.04	98194.62	11521.51	21868.69	14485.07	111553.66	112688.44	92278.72	6736.65	90765.15	72281.84	87764.65	100591.22	88760.17	77968.41	112010.81	71930.62	72367.04	74731.33
MW2515	SC-19220	C16H14ClN3O3	330.0689	331.0724	0.7275	2.3255	1	19395-87-0	--	--	45606.0	1.0	-	-	75520.45	60828.85	116581.31	80982.58	170491.21	65906.55	192864.55	70257.1	110730.48	82706.5	57987.38	65447.35	24020.36	52115.72	32759.64	35274.93	47407.41	55629.6	50466.13	54505.79	101456.76	101139.63	104055.03
MW9089	SB 415286	C16H10ClN3O5	719.069	359.0309	0.6452	1.1118	1	264218-23-7	--	--	45235.0	1.0	-	-	34756.08	42275.49	32279.72	77373.42	38593.47	78088.36	38497.7	85854.73	62421.78	117271.32	88341.36	86862.89	31716.21	66812.15	23588.57	63975.82	18902.73	47371.83	89370.06	73517.08	71186.15	71249.42	72321.15
MW2514	SB 221284	C16H14F3N3OS	334.0624	353.081	0.5923	0.83	1	--	--	C11741	--	1.0	-	-	32847.07	156833.08	112863.01	94144.71	65177.32	381748.0	63596.5	588982.83	42357.31	128171.62	14629.61	22069.58	68055.04	14328.95	14360.08	7476.28	13081.6	20264.34	17948.05	21432.2	41261.15	41383.5	40063.13
MW2513	SB 216763	C19H12Cl2N2O2	739.0449	370.0276	0.5308	1.1357	1	280744-09-4	--	--	45234.0	1.0	-	-	10096.7	12570.19	17805.74	18465.18	14100.33	30595.97	8952.11	29168.31	19297.42	24718.62	6056.68	5921.53	11787.24	5249.91	7754.31	3587.47	4289.39	5912.66	7289.74	4213.94	14765.54	14882.81	15119.77
MW9087	SB 203580	C21H16FN3OS	491.9751	377.0998	0.6334	4.7779	1	152121-47-6	--	--	45450.0	1.0	-	-	1738.05	686.31	278.29	335.88	1149.49	716.29	1190.12	543.08	684.62	673.71	899.71	200.13	44461.77	2397.4	1640.22	1045.16	2943.46	9152.86	5254.67	5158.16	6310.54	6322.67	6180.64
MW9082	SAQUINAVIR MESYLATE	C38H50N6O5	734.4002	670.3843	0.6451	4.8049	1	--	--	C12560	--	1.0	-	-	45116.99	22266.84	44473.34	68092.43	44841.8	81761.61	52817.15	75221.99	76239.54	53627.62	6203.67	11684.01	10744.73	2302.05	2668.78	4116.46	1887.74	14889.21	7840.68	3787.73	15538.27	14721.35	14877.33
MW9072	SAHA-Bpyne	C27H31N3O5	993.418	477.2264	0.5853	4.7745	1	930772-88-6	--	--	96437.0	1.0	-	-	120.15	375.68	320.0	289.92	1524.67	1944.94	1524.4	162.57	136.18	1739.8	29500.07	613.36	712.1	18702.9	20531.03	25128.64	10311.29	278.09	1440.74	1298.37	4878.01	4872.07	4781.07
MW9066	S9947;2'-(Benzyloxycarbonylaminomethyl)biphenyl-2-carboxylic acid 2-(2-pyridyl)ethylamide	C29H27N3O3	512.2179	465.2052	0.6429	2.3308	1	--	--	C13771	--	1.0	-	-	1584.9	405.71	435.94	79.21	147.67	61.43	218.83	165.93	596.06	244.8	9971.33	307.67	7184.35	11180.85	9205.66	13315.92	11773.22	18146.18	9846.13	799.06	1358.22	1708.3	1852.82
MW9065	S1P Lyase Fluorogenic Substrate	C14H18NO8P	435.9958	359.077	0.6254	4.5803	1	--	--	--	64808.0	1.0	-	-	3459.13	105.63	1645.04	1668.76	1620.12	1126.46	1601.04	93.18	1835.68	1927.15	5623.82	861.8	1287.51	6107.04	6069.67	7169.29	5737.25	2810.19	174.38	3495.59	6496.48	6680.11	6664.52
MW9064	S-Sulfanylglutathione;Glutathione hydrodisulfide	C10H17N3O6S2	696.1473	339.0559	0.8309	3.9936	1	--	--	C17267	--	1.0	-	-	22941.43	1118.62	14132.58	27047.0	1922.81	1577.29	15376.79	2118.44	857.8	1745.42	295516.7	109119.02	163038.38	298483.45	285896.35	312030.96	334218.85	255124.27	230261.53	168149.71	113257.94	112403.21	112955.15
MW9063	S-Succinyldihydrolipoamide	C12H21NO4S2	632.217	307.0912	0.6144	4.3027	1	--	HMDB01177	C01169	--	1.0	-	-	76332.76	54626.2	27338.82	30668.47	11607.2	22001.61	14917.83	18981.7	6753.08	10123.02	918.16	54220.45	23095.71	1161.92	368.06	489.22	1402.76	34513.85	25052.24	41332.95	32423.08	32268.32	30988.37
MW9062	S-Seven;O-Ethyl O-2,4-dichlorophenyl thionobenzenephosphonate;EPBP	C14H13Cl2O2PS	714.936	345.9751	0.5096	1.1135	1	3792-59-4	--	C19148	--	1.0	-	-	8932.05	13038.27	13907.76	14402.73	9526.88	31781.72	8053.03	27704.76	11849.85	35188.77	13785.61	14490.44	12019.88	23231.29	21602.58	19957.35	14076.24	12241.52	25777.53	6096.12	18200.54	16966.68	17740.7
MW2503	S-Nitroso-L-glutathione	C10H16N4O7S	352.0939	336.074	0.5971	6.0435	1	57564-91-7	--	--	58248.0	1.0	-	-	62717.94	14389.6	57625.0	18510.86	10523.17	16248.36	11743.29	15690.47	82081.74	87024.7	35909.47	14349.93	23099.45	30009.88	30257.49	33243.61	32996.92	32748.83	45918.59	23064.48	36154.74	37459.28	35851.64
MW9061	S-NEPC	C16H13NO6	382.0266	315.0743	0.5746	0.7346	1	--	--	--	64656.0	1.0	-	-	45750.09	124417.25	82906.83	140197.19	136411.84	118383.96	132054.83	112089.28	73773.77	102323.81	35454.59	50133.05	45028.29	35192.44	35660.01	34887.35	35456.02	32810.92	41685.95	45449.03	69843.63	69955.42	68360.9
MW9060	S-Methyl-3-phospho-1-thio-D-glycerate	C4H9O6PS	262.9986	215.9857	0.6448	2.2268	1	--	--	C04399	--	1.0	-	-	118164.98	333053.83	260613.02	195730.34	274497.26	310925.65	278283.01	321141.98	250518.74	225082.51	205205.28	216027.39	235578.05	305815.2	276971.22	365261.66	298074.15	267283.13	272252.47	179409.24	236394.32	224922.7	218627.89
MW2502	S-Inosyl-L-homocysteine	C14H19N5O6S	384.0975	385.1056	0.5845	1.806	1	--	--	C03431	--	1.0	-	-	147423.02	73592.31	86164.26	79895.31	77593.68	87048.57	85096.27	80497.05	68227.52	84029.57	69797.19	63402.4	36697.51	71533.84	68693.6	79758.8	75750.76	81647.03	83801.88	59536.76	84729.92	85499.94	84702.19
MW9059	S-Farnesyl Thioacetic Acid	C17H28O2S	373.1002	296.181	0.8939	12.6274	1	135784-48-4	--	--	43440.0	1.0	-	-	30633.51	38544.49	39300.49	37704.32	45793.3	66502.6	62313.81	62914.73	24756.05	18484.35	25663.72	12702.05	17804.71	18135.32	28938.34	23435.77	19821.69	15991.01	13310.88	7495.52	193681.0	184170.91	180097.9
MW2501	S-Adenosylmethionine	C15H23N6O5S	420.119	399.1451	0.5932	4.6179	1	--	HMDB0001185	--	--	1.0	-	-	45349.39	63902.51	46111.62	59496.08	54879.48	49677.07	61050.99	39389.78	62908.37	60931.55	30162.94	32673.57	30843.94	9765.92	27335.99	3306.59	2859.74	31833.23	43422.86	6726.43	47522.29	47800.51	47527.87
MW9056	S-Acetylthioethanolamine	C4H9NOS	158.0029	119.0405	0.5911	13.5995	1	--	--	C03537	--	1.0	-	-	1170252.02	1611267.71	1261176.98	1549748.78	1640715.14	1650389.6	1726825.03	1404620.88	1781292.35	1627445.55	1776077.92	1539195.97	1478196.33	1173589.36	1507332.28	1455854.82	1471800.92	1402171.36	1186618.25	1587682.92	1462946.82	1436832.37	1445174.47
MW2500	S-4-benzyl-3-((S)-3-hydroxy-2,2-dimethyloct-7-ynoyl)-5,5-dimethyloxazolidin-2-one	C22H29NO4	408.1583	371.2097	0.6463	7.6994	1	--	--	--	65465.0	1.0	-	-	4411.75	14433.99	5534.29	11160.64	6758.33	7304.28	11464.34	8095.41	10569.47	8930.76	7965.45	7881.63	6588.36	6558.81	7190.11	8981.26	8252.32	5196.03	8485.98	6659.34	10503.97	10357.79	10244.96
MW9054	S-(Formylmethyl)glutathione	C12H19N3O7S	372.0836	349.0944	0.6409	4.0766	1	--	HMDB0060507	C14871	--	1.0	-	-	2891.85	2519.06	2317.38	2159.47	2083.18	2447.51	2474.93	160.33	419.82	2645.98	16395.61	9130.29	12800.52	14988.65	16111.75	17794.19	14724.3	310.51	474.33	9935.0	4417.36	3806.33	4713.5
MW9053	S-(4-Nitrobenzyl)glutathione	C17H22N4O8S	443.1225	442.1158	0.6079	1.3521	1	6803-19-6	--	--	4098.0	1.0	-	-	17189.49	37350.79	19059.5	31060.65	31608.45	22695.95	41646.48	15598.08	13094.2	12348.47	16356.9	44554.84	41683.07	13436.56	14086.14	11165.31	13453.85	8033.62	9595.12	42125.26	15679.13	15228.67	15597.01
MW9052	S-(4-Bromophenyl)-mercaptopyruvate	C9H7BrO3S	586.8253	273.9299	0.535	4.7105	1	--	--	C04264	--	1.0	-	-	71551.1	59260.39	72430.72	22554.52	89062.53	54899.67	47505.63	66660.78	78403.23	46970.63	1644.27	3359.74	4157.94	659.33	747.12	656.45	990.24	13056.16	5802.63	8702.58	6592.95	7634.43	7930.08
MW2496	S-(2-Hydroxyethyl)-N-acetyl-L-cysteine	C7H13NO4S	228.0311	207.0565	0.6409	6.513	1	15060-26-1	METPA1182	C14876	--	1.0	-	-	246.0	276.72	3714.68	186.76	1853.01	347.94	200.22	3063.85	3583.47	4861.4	24351.52	10130.94	19706.61	25524.22	22299.38	26226.04	26832.5	9372.26	215.45	216.37	10134.95	10395.1	10279.83
MW2495	S-(2-Chloroacetyl)glutathione	C12H18ClN3O7S	399.0747	383.0554	0.6491	4.4197	1	--	HMDB0060505	C14864	--	1.0	-	-	34173.88	22267.36	16633.22	13589.06	7875.06	40762.72	8218.26	30333.12	2113.37	24641.3	19728.96	37971.64	21113.56	15474.36	21720.25	24919.26	22276.83	19314.69	16949.17	32985.47	22452.43	22450.92	22295.66
MW9051	S-(1,2-DICARBOXYETHYL)GLUTATHIONE	C14H21N3O10S	537.9719	423.0948	0.5332	4.0739	1	1115-52-2	--	--	44314.0	1.0	-	-	37356.91	6013.1	3134.2	28993.75	2203.08	2066.53	2337.2	4754.41	3207.58	2321.52	100.61	11780.03	11146.08	322.14	76.86	257.11	83.5	1819.44	1867.49	8072.96	16066.62	15847.56	16027.55
MW9050	Ryanodine;Ryania	C25H35NO9	1004.4874	493.2312	0.6674	4.3772	1	15662-33-6	--	C08705	--	1.0	-	-	111220.52	176972.63	121945.11	197932.69	63598.05	349443.44	78705.0	294489.21	139009.29	87189.8	8400.32	95918.96	100127.39	8929.73	5738.01	3960.04	45505.78	133519.05	64189.96	27341.08	78933.68	78828.36	75317.65
MW2493	Rutaecarpine	C18H13N3O	573.203	287.1059	0.576	0.9493	1	--	HMDB0042010	C09238	--	1.0	-	-	17099.82	31599.75	26792.05	14343.31	13888.89	13132.24	14180.7	12915.59	12873.33	12665.53	39467.78	30045.81	16269.24	41018.83	30895.44	20276.88	28024.27	44428.44	41782.67	34753.35	31812.4	31300.08	29093.56
MW9049	Rugulosin	C30H22O10	587.0922	542.1213	0.6269	1.5482	1	19292-47-8	--	C16764	--	1.0	-	-	40599.58	45520.26	62751.42	54818.39	3030.52	106148.17	5959.7	71542.15	45222.08	80353.39	56057.17	13326.71	41139.78	46205.95	46719.54	45924.33	49608.87	87104.15	72814.29	38547.74	58730.94	58849.45	58864.83
MW2492	Rubrofusarin	C15H12O5	293.0431	272.0685	0.6435	4.5279	1	3567-00-8	--	C09047	--	1.0	-	-	1546.35	75386.23	76534.61	69250.75	72752.48	62858.29	70267.33	65512.0	63256.47	74286.53	195469.71	93798.44	98806.43	200087.4	181546.61	206069.3	218170.43	7011.06	7768.11	106655.12	53778.02	58045.52	50944.99
MW9047	Rotenonone	C23H18O7	520.9776	406.1053	0.5001	2.1921	1	4439-62-7	--	C10525	--	1.0	-	-	182699.86	123890.57	65758.86	51507.8	64057.33	67908.64	64909.8	92667.44	58006.1	110222.28	90792.01	49738.35	21655.5	95237.17	110652.39	108975.7	86603.18	73945.84	97580.02	56215.36	93551.6	90297.34	89738.14
MW9045	Rose bengal	C20H4Cl4I4O5	1038.4538	971.4992	0.6092	13.1675	1	--	HMDB0036613	--	--	1.0	-	-	1972.4	1086.6	488.86	1691.85	3153.84	3741.81	3236.43	2665.8	22421.07	27461.65	28839.05	21617.76	25001.87	15788.31	9810.44	11453.32	14158.55	15796.44	14417.42	15006.84	6478.93	10776.17	10524.63
MW2487	Rocuronium	C32H53N2O4	566.3457	529.4005	0.729	9.7448	1	--	HMDB0014866	C07556	--	1.0	-	-	1032036.61	14674.9	24831.57	53489.97	51756.01	98188.74	51845.86	80165.65	158053.33	15981.24	71675.1	83129.72	180044.33	139365.06	74372.25	84222.75	103096.57	67197.01	25361.65	108538.98	117941.0	117258.98	117032.57
MW2486	Robinetinidol-(4alpha->8)-catechin-(6->4alpha)-robinetinidol	C45H38O18	882.2241	866.2058	0.6137	1.2032	1	85820-29-7	--	C10239	--	1.0	-	-	39932.08	57958.59	45832.82	49148.87	43327.56	47094.94	38141.02	45468.86	26939.22	37315.13	32178.91	42436.88	24940.07	30373.99	26481.79	31269.68	28011.89	14538.65	21186.49	29176.06	36946.43	37985.28	37350.04
MW9041	Robenacoxib	C16H13F4NO2	374.1005	327.0882	0.6139	12.6025	1	220991-32-2	--	C20708	--	1.0	-	-	4941.37	4692.23	6056.7	4967.19	8922.01	11876.26	10949.84	10456.87	2804.13	2935.85	2806.33	1931.71	1781.73	2588.52	6092.85	3147.89	2499.48	1924.8	1747.38	767.1	48352.9	52034.29	39015.6
MW9040	Ro 48-8071	C23H27BrFNO2	448.1287	447.1209	0.7455	4.7172	1	161582-11-2	--	--	44928.0	1.0	-	-	132316.23	152447.39	161854.35	145042.45	196184.06	129600.09	209475.0	120522.19	216916.54	90990.62	18783.42	1674.42	59201.29	18970.99	1901.61	19626.87	22343.75	30133.22	2945.4	44993.16	12933.7	12999.62	13122.71
MW2485	Ro 31-6045	C21H15N3O2	681.2261	341.1164	0.6225	1.5185	1	113963-68-1	--	--	45525.0	1.0	-	-	21331.32	23473.37	3706.77	23211.58	31103.74	5099.25	34741.51	5718.91	39233.86	8967.38	541.91	10298.84	2826.62	1748.49	1442.22	1683.23	913.83	3763.71	2613.42	15348.53	16606.97	17976.61	16371.18
MW2484	Rivenprost	C24H34O6S	469.2064	450.2076	0.6409	6.6127	1	256382-08-8	--	--	96514.0	1.0	-	-	66476.18	1704.89	24695.27	28847.38	12563.36	58733.98	10287.44	59856.18	23081.2	32304.9	24526.66	222.19	10992.31	24215.79	19739.23	25511.01	25205.48	39376.67	47399.12	386.19	36838.59	36140.24	36805.37
MW9039	Rivastigmine tartrate (Exelon)	C18H28N2O8	467.138	400.1846	0.6419	4.0759	1	--	--	D02558	--	1.0	-	-	4998.93	1572.07	1149.77	2110.59	327.08	1790.61	1191.24	829.02	245.21	3945.04	20535.97	26570.68	20516.1	26389.18	31336.9	31471.83	32807.69	26108.75	18635.93	33987.18	13706.82	13058.91	13632.47
MW9038	Rivaroxaban	C19H18ClN3O5S	871.1386	435.0656	0.646	4.78	1	366789-02-8	--	D07086	--	1.0	-	-	42379.05	13672.88	80523.18	41421.24	52270.88	46853.91	54044.48	36460.03	83860.5	54070.38	2898.14	1672.96	1524.16	4468.83	2608.1	432.39	954.93	4006.98	2835.51	4847.02	6719.49	6128.3	6826.98
MW2483	Ritonavir	C37H48N6O5S2	701.2937	720.3128	0.5999	4.3372	1	--	HMDB0014646	C07240	--	1.0	-	-	208.71	153.08	151.07	171.08	310.53	149.34	368.83	121.49	140.84	327.95	11984.45	2058.18	688.6	9201.21	9337.15	8541.43	12718.98	2713.74	2705.14	7274.28	3064.29	3104.79	3013.88
MW2482	Rishitin	C14H22O2	221.1543	222.162	1.0	7.6928	1	18178-54-6	HMDB35593	C09715	--	1.0	-	-	134424.64	198653.05	106968.76	191157.97	132597.83	108598.95	186557.66	141076.97	152792.87	169377.87	125479.53	137524.12	125271.58	139822.33	127703.28	150979.95	167789.68	167411.42	136749.19	161902.08	181506.63	181390.09	180358.5
MW9033	Rimsulfuron	C14H17N5O7S2	414.0535	431.0569	0.6416	1.5155	1	122931-48-0	--	C10952	--	1.0	-	-	5452.75	7174.81	17640.89	23212.5	13958.27	32485.88	12366.88	43705.86	16391.99	36559.28	10511.23	1858.97	5963.11	6008.33	10101.12	6085.15	9850.73	21973.81	10697.96	9894.95	17359.69	16525.81	16291.25
MW9032	Rimantadine	C12H21N	180.175	179.1674	0.6297	6.3794	1	13392-28-4	HMDB0014621	C07236	43325.0	1.0	-	-	9869.73	20217.87	11680.39	13348.11	9809.63	12933.88	10099.06	13241.0	7853.67	13228.45	10854.41	9450.67	18396.11	10580.47	8099.51	5614.65	9221.13	15228.99	8992.94	8757.49	10503.53	10466.65	10809.6
MW9031	Rifamycin Z	C35H41NO11	766.1459	651.268	0.5387	1.3993	1	79486-49-0	--	C14723	--	1.0	-	-	11520.01	18392.51	5960.69	23895.6	13852.36	16801.26	10187.4	10875.35	16322.56	5518.04	877.8	7464.5	4703.71	2653.35	448.1	1898.96	1166.55	1711.26	2055.03	8973.45	9085.97	8885.69	8865.46
MW2478	Rifamycin W	C35H45NO11	654.2946	655.2993	0.9528	10.0671	1	53904-81-7	--	C12247	--	1.0	-	-	156878.15	54711.78	38845.9	54276.36	60104.85	28738.19	56133.7	9058.29	13559.6	22203.37	84084.69	91184.92	15832.49	84271.04	32157.85	89958.05	118719.03	3677.26	947.84	108262.85	69776.28	69230.49	70451.27
MW9029	Rifampicin;Rifampin	C43H58N4O12	809.4038	822.4051	0.747	4.1131	1	13292-46-1	HMDB15179	C06688	--	1.0	-	-	7316.65	4999.26	4431.51	9911.69	4207.04	2525.33	3268.66	3196.78	743.7	2891.46	79896.53	72158.59	74154.52	73814.97	51630.11	61589.26	67563.12	70184.88	51629.27	98615.71	35900.79	35087.16	35154.89
MW2474	Rifabutin	C46H62N4O11	883.3912	846.4415	0.612	2.2258	1	--	HMDB0014753	--	--	1.0	-	-	10854.72	28412.81	9726.9	10730.36	13652.85	11624.4	13905.15	5253.83	10501.99	3042.81	2773.83	36798.82	45525.22	470.13	237.12	4269.72	256.06	825.8	5715.86	19674.36	14092.0	13972.26	11555.8
MW9027	Ricinoleic Acid methyl ester	C19H36O3	642.5649	312.2664	0.5611	4.2939	1	141-24-2	--	--	45190.0	1.0	-	-	178324.65	191007.2	132427.23	163142.6	85104.89	87003.56	64752.41	80824.55	11455.65	77096.01	1073.18	53258.81	546.8	15061.86	12337.52	9716.25	15496.36	3108.66	11028.72	1285.7	29030.02	26621.36	16419.37
MW9026	Ribosylhopane	C35H60O4	586.4825	544.4492	0.6217	11.2275	1	--	--	C21118	--	1.0	-	-	16038.78	263.14	8148.2	5270.57	14385.34	4511.39	19111.08	1882.86	15744.13	725.0	41879.43	104093.95	984.35	32195.51	35856.49	46222.72	44645.04	19458.57	11742.82	129388.24	29974.92	26699.76	30559.32
MW2473	Riboflavin cyclic-4',5'-phosphate	C17H19N4O8P	875.1795	438.0941	0.603	2.583	1	--	HMDB0059614	C16071	--	1.0	-	-	21819.56	49019.3	43758.84	5708.5	10433.71	7194.88	5518.2	9025.22	7543.59	19931.14	55814.14	41625.44	3388.42	49261.36	49653.86	47822.22	55299.52	50003.04	58087.66	47915.56	43372.72	44947.94	42863.36
MW2472	Riboflavin	C17H20N4O6	752.2719	376.1383	0.9948	4.6851	2-MetDNA	--	HMDB0000244	C00255	--	1.0	-	-	16959.97	11291.43	43524.75	22097.11	28736.03	51667.41	27315.25	44517.44	52467.22	25256.05	19018.83	5542.91	1899.35	17515.51	18370.11	22228.96	19987.56	23325.94	21887.93	4154.48	23324.09	23100.85	23309.84
MW2466	Ribitol	C5H12O5	133.05	152.0685	0.6035	1.802	1	--	HMDB0000508	C00379	--	1.0	-	-	50447.85	31418.33	49332.89	31559.04	85582.93	49261.97	88870.4	44759.14	53264.46	52708.32	86805.04	113741.62	31031.99	82199.22	72696.48	64702.27	85022.83	82447.82	67264.33	137552.36	67957.72	69228.25	69156.04
MW9013	Rhodomycin D	C28H31NO11	602.1614	557.1897	0.6312	1.2081	1	--	--	C12426	--	1.0	-	-	10184.32	14141.23	59689.45	24019.57	2346.75	11555.07	5419.38	11744.91	19659.79	6892.59	10605.63	26264.75	9606.82	9373.19	9810.61	8238.65	7995.75	8004.97	9111.58	25622.34	18163.1	18351.06	18103.38
MW9012	Rhodojaponin IV	C24H38O8	477.247	454.2567	0.5877	1.4424	1	30460-34-5	--	C09180	--	1.0	-	-	13327.28	17771.36	11344.6	6079.79	18080.99	5355.22	17201.04	4720.18	12006.31	5160.09	2442.29	1151.05	4598.11	3475.38	3781.95	2827.23	1091.2	903.08	393.78	5078.4	4410.79	4429.11	4194.64
MW9011	Rhodexin A;Sarmentogenin 3-O-alpha-L-rhamnoside	C29H44O9	578.3344	536.2985	0.5415	4.0845	1	545-49-3	--	C08877	--	1.0	-	-	28797.22	24016.06	22149.27	14268.22	9919.3	12371.82	5877.5	13532.53	11268.27	17476.96	67178.91	93960.96	1756.06	60767.63	56285.87	62592.25	61930.85	51089.93	43720.37	34795.04	35014.64	34462.58	34581.37
MW9010	Rhodanine;2-Thioxo-4-thiazolidinone	C3H3NOS2	97.9533	132.9656	0.5346	13.3824	1	141-84-4	--	C07280	--	1.0	-	-	128116.16	341353.79	329230.77	585471.05	153101.45	563189.23	359828.05	589623.33	569355.57	577206.01	162945.52	165359.36	288833.26	143369.92	143643.92	535508.04	519875.15	457887.31	285697.73	158178.52	264142.67	256751.04	228891.78
MW2464	Rhodamine B	C28H31N2O3	464.2091	443.2335	0.5848	0.8171	1	--	HMDB0031786	--	--	1.0	-	-	22499.84	29436.73	22695.98	23387.67	17111.82	16926.11	26329.23	13739.18	23722.21	17034.25	35096.83	40618.45	13845.55	37873.11	32804.78	36887.41	36538.67	21093.83	20955.0	55804.75	29127.31	29516.96	29133.7
MW9009	Rhizoxin	C35H47NO9	667.3587	625.3251	0.6422	4.1939	1	90996-54-6	--	--	85113.0	1.0	-	-	227873.15	192110.63	108759.45	257270.23	102321.26	270313.78	103692.39	249924.38	46693.98	102683.24	30291.12	293563.89	680.62	28173.69	932.44	4134.61	16696.12	193065.82	167067.72	91079.08	165690.7	165429.29	163764.44
MW9007	Retinyl palmitate	C36H60O2	569.4302	524.4593	0.6264	4.1146	1	--	HMDB0003648	C02588	--	1.0	-	-	3372.49	1122.96	1467.67	8148.51	2123.98	3098.91	575.79	3110.36	866.48	2100.76	14630.09	70411.07	336.65	19090.24	16951.15	27309.01	29105.16	38606.02	34677.65	75597.34	35121.04	35119.71	34490.64
MW2462	Resveratrol 3-sulfate	C14H12O6S	289.0175	308.0355	0.6488	0.9394	1	--	HMDB0041772	--	--	1.0	-	-	700.92	157.12	1017.65	1465.68	448.06	1467.26	2406.55	849.5	5182.0	434.25	16705.6	16471.37	1681.46	15224.43	18643.77	22483.6	21802.29	4801.28	6178.4	30426.42	4131.25	4107.09	4117.12
MW9006	Resmethrin	C22H26O3	694.4087	338.1882	0.5804	4.9246	1	10453868	--	C10991	--	1.0	-	-	885.71	22919.44	20506.12	21339.87	23504.58	25892.06	25557.83	23994.25	22926.34	22385.54	8037.51	305.32	934.79	5241.23	2313.19	2321.71	3409.31	4311.57	18283.13	10881.72	46009.45	46357.83	45790.41
MW9003	Resazurin	C12H7NO4	111.9841	229.0375	0.7197	13.99	1	550-82-3	--	C11178	--	1.0	-	-	270559.53	393152.85	284549.83	358723.6	394719.7	374924.27	367479.46	340059.8	263862.84	248419.35	538287.03	369268.62	308386.0	252895.68	445518.27	307224.24	524948.98	263570.63	518734.11	504380.82	355921.28	357131.76	353602.84
MW2460	Renilla luciferin	C26H21N3O2	444.1102	407.1634	0.5332	4.6851	1	--	--	C00982	--	1.0	-	-	4278.66	5003.73	8807.61	6612.94	9200.24	13963.64	13064.95	15382.76	10659.82	10389.93	1874.0	3364.22	2082.3	3033.73	4828.46	2876.61	1322.67	7685.87	5530.23	286.87	5994.9	6133.51	5772.09
MW9002	Remikiren	C33H50N4O6S	672.3798	630.3451	0.6064	4.6266	1	--	HMDB0014357	--	--	1.0	-	-	569669.15	103796.5	45462.27	25995.13	166936.76	23632.73	167403.2	8987.24	631959.18	83649.53	48494.19	1166.76	3976.72	36307.39	37228.86	44456.66	826.36	56654.62	64705.46	47432.3	19306.93	26112.11	26660.53
MW2459	Rehmaionoside A	C19H34O8	389.2177	390.2254	0.868	5.6489	1	--	--	C17450	--	1.0	-	-	5132.89	6722.24	10435.88	340.83	74687.64	40404.35	77633.31	13635.62	11087.86	22984.94	177116.09	226006.06	4249.03	160255.27	162555.63	195457.59	191863.59	4365.39	8273.92	50533.18	75920.58	75208.32	75235.52
MW2457	Rebeccamycin	C27H21Cl2N3O7	585.0975	569.0757	0.5239	4.5272	1	93908-02-2	--	C19701	--	1.0	-	-	491.82	352.82	1194.16	636.43	459.62	420.95	247.19	911.01	1222.3	887.89	15202.22	4502.45	4222.0	15942.05	16663.92	15287.49	17108.96	537.98	961.68	246.72	1527.06	1478.85	1484.24
MW2456	Rebaudioside F	C43H68O22	952.437	936.4202	0.57	4.4359	1	438045-89-7	--	--	263502.0	1.0	-	-	371.03	110.67	120.17	1381.78	1842.75	1210.62	2040.8	112.43	2247.59	98.4	13144.43	2457.8	413.06	13643.41	13032.05	13366.79	15500.87	1964.68	3080.93	13331.27	5353.77	4993.67	5108.67
MW9000	Rebaudioside C	C44H70O22	992.4712	950.4359	0.6029	2.4698	1	--	HMDB0034947	--	--	1.0	-	-	2957.96	224.42	24653.86	18661.26	120.56	282.62	5105.58	145.58	39040.36	64865.03	106335.01	107272.57	1366942.03	83436.21	89193.24	119340.95	72924.28	33548.33	26551.03	54801.21	41389.79	41431.93	41392.54
MW8999	Reactive blue 2	C29H20ClN7O11S3	756.0065	773.0071	0.5429	10.8977	1	12236-82-7	HMDB34709	C13746	--	1.0	-	-	343.31	10.11	15.13	7.91	37.66	547.73	594.43	504.97	253.8	8.2	145.12	191.58	7374.36	168.51	77.32	126.39	126.37	57.99	95.19	54.51	2530.55	2714.49	2751.8
MW2452	Rapanone	C19H30O4	321.2067	322.2144	0.617	6.5301	1	573-40-0	--	C10399	--	1.0	-	-	18977.93	325.1	4030.18	8598.43	8228.56	23747.16	7662.25	23051.52	6183.56	10912.48	16996.36	7267.74	6843.75	18221.19	11318.55	17287.01	22778.38	11013.29	11838.58	240.81	12411.28	11968.86	11841.76
MW8997	Ranunculin	C11H16O8	575.1582	276.0845	0.6439	4.627	1	644-69-9	--	C08512	--	1.0	-	-	953103.9	450283.42	700736.61	232670.28	145072.96	209789.09	143582.18	194526.39	551172.77	430130.48	4467.71	3197.52	72587.35	22259.87	31820.07	21892.61	707.48	1155.5	2998.6	2273.11	25255.63	27468.35	22241.22
MW8996	Ranolazine	C24H33N3O4	542.122	427.2471	0.6443	13.1786	1	95635-55-5	HMDB0014388	D05700	--	1.0	-	-	2517.41	227905.67	604410.09	46818.47	7313.96	7999.69	7231.53	548811.49	767980.85	634811.52	985.53	1203.21	331212.84	271835.58	2308.36	1438.46	71982.97	2077.73	389.43	415.13	3045.05	3222.95	2123.92
MW2450	Ramipril	C23H32N2O5	453.1802	416.2311	0.8681	6.7955	1	--	HMDB0014324	D00421	--	1.0	-	-	342797.87	46123.79	183172.31	278120.72	172213.81	504195.8	180722.67	466748.41	246513.84	321595.1	375191.63	41918.9	180900.16	382720.68	349719.83	376598.31	380932.17	291491.77	312051.76	5955.34	298493.84	295931.66	295843.76
MW2449	Radicicol	C18H17ClO6	385.047	364.0714	0.5814	4.6851	1	12772-57-5	--	--	45457.0	1.0	-	-	9493.01	13714.03	18550.75	18521.55	22769.45	26879.81	22059.74	27730.79	15996.11	19743.96	5250.36	5259.6	1578.15	4901.14	6894.16	6166.08	7954.3	11004.83	10948.04	2826.26	13633.27	13837.32	14051.68
MW2448	Racecadotril	C21H23NO4S	404.1327	385.1348	0.5769	1.6149	1	--	--	D08464	--	1.0	-	-	22366.43	13731.9	14517.42	24352.87	53292.84	30544.81	54375.37	25016.34	22065.48	13615.17	19738.64	15224.84	8493.14	25502.75	22137.04	31231.08	37646.68	16085.08	14855.03	20604.18	21805.28	22160.55	22181.94
MW2491	ROSOLIC ACID	C19H14O3	579.18	290.0943	0.5797	7.6207	1	603-45-2	--	C14213	44052.0	1.0	-	-	5625.65	192.06	928.9	1851.67	407.36	2182.57	130.25	1799.74	1308.29	150.8	687.51	139.86	4012.21	782.69	557.0	546.18	670.01	1543.1	199.09	1539.48	3980.68	3988.99	3989.09
MW9042	ROCCELLIC ACID	C17H32O4	339.1936	300.2301	0.6251	11.2512	1	22139-54-4	--	--	43927.0	1.0	-	-	10997.04	14591.83	8342.12	22025.83	5843.63	1689.47	16430.82	13852.06	9582.17	5190.76	3760.75	1323.76	3407.56	1390.88	1849.46	2394.63	2621.26	7108.22	1510.65	3437.04	8984.7	10023.42	6380.89
MW9008	RG-14620	C14H8Cl2N2	238.9919	274.0065	0.5963	0.7791	1	136831-49-7	--	--	45245.0	1.0	-	-	77454.66	72170.75	102592.18	278404.88	79536.83	207576.11	77446.7	215091.84	59194.44	96857.25	47627.82	37388.05	40482.67	37983.75	39857.27	46129.07	45466.54	45303.05	44596.63	40738.71	79420.73	80148.32	79902.29
MW2463	RG-108	C19H14N2O4	667.1828	334.0954	0.6188	4.6768	1	48208-26-0	--	--	64811.0	1.0	-	-	107.27	2825.73	88.24	237.89	4041.18	73.6	3711.62	187.89	74.92	87.31	35656.92	186.42	7995.36	36097.89	33765.81	40628.72	42969.0	6941.34	6093.1	653.73	12799.87	12815.22	13037.47
MW2447	Quisqualate	C5H7N3O5	170.02	189.0386	0.5979	5.2009	1	52809-07-1	--	C08296	--	1.0	-	-	557765.98	337246.53	1018281.95	251549.11	587608.87	151966.96	201896.11	162087.66	280888.41	495825.86	64921.4	84972.97	88052.07	91732.5	82840.79	82453.06	75130.22	79008.37	390826.38	74485.75	147495.9	146298.53	145729.5
MW8993	Quinupramine	C21H24N2	609.3954	304.1939	0.6399	10.4705	1	31721172	--	D07336	--	1.0	-	-	8192.71	35936.02	14995.27	14786.83	22920.69	19921.48	23156.68	32577.83	959.86	16273.95	10884.67	29469.19	5997.76	10314.71	7293.63	9748.94	11088.77	15668.2	13032.13	16189.39	29593.36	29519.2	28470.11
MW8991	Quinoxyfen	C15H8Cl2FNO	632.0305	306.9967	0.5031	4.8751	1	124495-18-7	--	C18892	72653.0	1.0	-	-	20737.2	48143.56	73395.95	15084.02	53655.7	34263.79	28107.72	50861.99	61861.87	40666.36	2747.65	754.84	3461.81	1432.65	3137.81	1667.46	2555.92	8104.46	12508.15	1859.33	19766.45	20301.28	21157.68
MW2444	Quinoline-2,8-diol	C9H7NO2	160.04	161.0477	0.7573	4.8177	2-search-DB	15450-76-7	--	C06342	--	1.0	-	-	1231048.9	294581.24	1418199.45	482784.6	486148.22	512483.89	485973.66	381091.9	2139089.47	1358290.76	1033544.32	158786.25	244539.11	1066882.67	338142.65	1063888.06	1137481.6	752592.5	796051.79	362833.02	836729.75	812105.48	821293.44
MW8989	Quinoline-2,4-diol	C9H7NO2	162.0552	161.0477	0.6321	4.8619	1	86-95-3	--	C16716	--	1.0	-	-	38723.32	32842.0	154056.68	68178.69	72494.6	65177.7	70760.88	66828.78	71509.58	61222.78	82413.36	161883.69	19415.02	48791.67	33877.16	89051.56	43335.52	36892.69	33174.77	65148.2	114724.58	114767.46	113611.11
MW8990	Quinoline yellow WS;C.I. Acid yellow 3	C18H9NO8S2.2Na	523.9668	476.9565	0.5105	4.8087	1	8004-92-0	HMDB37615	C20349	--	1.0	-	-	52031.16	12909.24	208784.4	139458.15	38382.22	51978.57	33059.47	21807.46	160344.06	119961.3	4376.49	8246.89	7802.1	2829.65	4191.07	4843.4	9664.63	30455.54	17282.63	3893.76	11486.42	11922.51	11816.55
MW2443	Quinoclamine	C10H6ClNO2	223.028	207.0087	0.6489	7.2524	1	2797-51-5	--	C18584	--	1.0	-	-	995.44	2012.54	1434.61	2140.48	3049.59	1247.05	2312.93	1656.02	1683.9	1209.29	1096.08	2693.45	2321.86	3416.93	4660.16	1268.5	5726.04	2283.47	3305.7	1772.54	7043.27	7720.01	7900.36
MW2442	Quinidine	C20H24N2O2	340.2029	324.1838	0.6345	13.2324	1	56-54-2	HMDB0015044	C06527	2220.0	1.0	-	-	91135.15	97824.84	76794.06	76579.8	84482.83	149879.12	106948.13	88674.01	81092.65	87824.09	167130.31	130413.53	142342.53	113979.31	74653.76	128840.21	110197.83	92929.81	108429.51	158339.98	123852.76	125392.36	125458.51
MW2441	Quinaprilat	C23H26N2O5	447.1338	410.1842	0.5803	7.9993	1	--	HMDB0042005	D03773	--	1.0	-	-	16918.47	25401.05	38334.97	58139.41	16236.83	16743.49	10381.04	15809.01	18836.93	43944.83	12109.79	6582.41	12107.73	13416.51	20022.56	9145.79	12316.76	8804.44	17348.35	36757.38	23618.87	24053.58	23544.22
MW2440	Quinapril	C25H30N2O5	437.2083	438.2155	0.6409	6.4224	1	--	HMDB0015019	C07398	--	1.0	-	-	578596.42	19617.72	127764.57	139713.74	69977.64	280529.51	240560.79	710103.92	77977.26	143154.83	276333.13	14727.97	64077.53	342328.43	239041.37	317789.39	277897.86	270754.63	283661.1	1760.77	195617.92	193007.28	192863.48
MW2439	Quinalphos	C12H15N2O3PS	297.0467	298.0541	0.6402	11.4982	1	13593-03-8	--	C11030	68785.0	1.0	-	-	482.06	423.84	199.11	20.48	110.74	15.62	439.37	30.12	141.69	116.62	196.34	61.25	504.98	313.11	58.92	32.11	1734.11	65.93	184.31	194.05	6225.68	6172.22	6505.67
MW2438	Quinacrine	C23H30ClN3O	380.1898	399.2077	0.6471	11.9884	1	--	HMDB0015235	C07339	--	1.0	-	-	20081.17	307747.58	8714.45	26288.46	48615.42	1275.85	23533.97	1118.67	6629.24	7939.5	24857.94	10488.24	29251.98	23926.34	14017.46	4110.14	18308.18	27049.98	6731.05	11665.42	23084.39	24978.93	21622.5
MW8987	Quillaic acid	C30H46O5	525.2985	486.3345	0.6023	4.5431	1	631-01-6	--	C08972	--	1.0	-	-	1473.19	944.91	1228.96	1999.73	2010.87	293.59	1740.96	1332.73	3955.49	723.2	32789.34	2879.43	1111.46	27920.25	29039.95	28049.03	25034.77	15667.56	15987.07	725.51	5548.44	6172.66	6487.74
MW8985	Quercetin 3-(6''-malonylgalactoside)	C24H22O15	614.1098	550.0959	0.5568	4.3438	1	--	--	--	50484.0	1.0	-	-	368497.32	128485.83	70291.33	83487.78	42241.07	117017.55	34418.16	104519.64	42250.93	111113.55	1876.69	17224.84	51269.57	1012.77	14204.69	21359.42	25431.41	58207.31	49888.69	28018.05	28633.23	28139.69	29337.55
MW2437	Quazepam	C17H11ClF4N2S	405.0256	386.0268	0.6436	2.2215	1	--	HMDB0015528	C07336	--	1.0	-	-	1566032.45	3671591.93	1906832.56	1961189.37	2296954.22	3287596.15	1284224.45	3222725.76	3592447.37	2179320.27	4353370.66	4226285.35	2459535.03	3848624.63	2511021.1	5574185.3	2358373.83	614132.85	1764380.54	2241068.34	3282040.8	2686318.24	3128075.82
MW2436	Quassimarin	C27H36O11	557.1995	536.2258	0.5926	7.078	1	59938-97-5	HMDB36888	C08777	--	1.0	-	-	17024.57	16112.77	22765.81	13325.74	6174.99	5152.19	7999.89	8507.65	15480.6	9742.39	19118.43	16125.48	30432.97	23090.4	21566.4	19726.43	16606.59	30475.23	27603.29	19540.08	15872.32	16029.86	16706.94
MW2431	Pyruvic acid	C3H4O3	128.0349	88.016	0.9723	1.3244	2-MetDNA	--	HMDB0000243	C00022	--	1.0	-	-	150504.39	165835.29	132625.38	89716.55	176810.73	111715.12	191415.13	182637.61	94286.58	129959.45	116060.02	97243.8	92615.67	165646.85	70747.59	112218.29	77359.1	72914.3	74293.21	144903.9	101741.68	106244.88	103100.57
MW8984	Pyrrole	C4H5N	143.96	67.0422	0.555	13.99	1	--	HMDB0035924	C19907	--	1.0	-	-	89855.07	89017.21	175417.66	99151.73	152236.23	100850.21	92904.44	114489.75	97296.61	85541.53	62297.74	85911.75	111909.18	88262.16	224895.73	85061.24	115230.31	74701.92	169619.08	122809.23	113337.53	111405.53	93812.33
MW2428	Pyrophosphate	H4O7P2	161.9136	177.9432	0.9005	13.2307	1	--	HMDB0000250	C00013	--	1.0	-	-	1960195.54	1949865.52	1570752.42	1719716.16	2916293.54	1533004.54	1324366.05	3165204.16	1501559.1	6776923.01	1468005.71	1006352.67	1356369.3	1024354.03	1012562.82	1055349.32	1089386.31	1231933.02	1210053.75	1310449.27	1205139.03	1184066.88	1194039.34
MW2427	Pyroglutamic acid	C5H7NO3	258.0802	129.0426	0.9152	1.6774	2-MetDNA	98-79-3	HMDB0000267	C01879	3251.0	1.0	-	-	384.48	1905.71	828.48	948.08	13349.1	9139.19	13454.6	8225.51	815.64	1179.97	72041.84	30048.49	60473.73	66579.38	66331.69	90183.71	63951.6	12764.77	14296.61	60609.01	31105.26	33985.11	33573.86
MW8981	Pyrithione zinc;Zinc pyrithione	(C5H4NOS)2.Zn	360.9023	315.9319	0.5842	4.6841	1	13463-41-7	--	C13427	--	1.0	-	-	2375.29	16140.54	11370.42	11229.52	33359.3	10278.67	12793.56	18212.08	9927.7	7578.42	161.89	868.34	12241.44	2194.53	354.16	549.76	1702.35	813.33	1507.97	7504.42	25291.56	25440.73	25037.67
MW8980	Pyriprole	C18H10Cl2F5N5S	492.9943	492.9954	0.6129	4.6263	1	394730-71-3	--	C18580	--	1.0	-	-	223305.29	104800.12	153099.95	59908.16	34083.18	44374.15	34809.89	49241.2	128807.13	98207.62	1298.83	10475.7	6258.24	650.77	619.45	667.07	660.86	778.26	814.43	665.77	4231.39	4454.92	3509.12
MW2424	Pyrimidine-4-Carboxylic Acid (sodium salt)	C5H4N2O2	160.9767	124.0273	0.5882	13.7832	1	819850-18-5	--	--	45027.0	1.0	-	-	114501.96	212469.06	78939.03	106506.34	102158.31	154974.07	80677.62	95028.53	159289.37	80928.0	122702.44	97124.68	33785.3	85630.38	73587.78	121947.99	116797.29	202977.14	147226.2	91053.32	102995.39	103583.23	98865.73
MW2423	Pyrimidine	C4H4N2	116.9864	80.0374	0.6182	0.7056	1	--	HMDB0003361	C00396	--	1.0	-	-	90547.07	106696.84	115962.56	102985.2	64745.54	105661.72	90912.69	81198.13	74863.86	107313.37	113444.83	84227.41	80710.12	110777.15	91821.48	119653.86	102119.27	90930.95	94684.76	94955.78	102237.36	104300.8	104118.03
MW2422	Pyridinitril	C13H5Cl2N3	544.966	272.9861	0.5876	12.4908	1	1086-02-8	--	C18931	--	1.0	-	-	44603.91	31662.04	35428.17	32518.83	35170.16	42794.88	35954.19	49439.42	48544.81	47030.25	31088.06	31725.39	32346.67	37078.36	44381.4	35904.56	29304.76	33148.47	25999.9	30308.37	39815.03	40788.8	39022.23
MW8979	Pyridine-2-azo-p-dimethylaniline	C13H14N4	470.2782	226.1218	0.6102	4.726	1	--	--	--	96366.0	1.0	-	-	146988.66	330172.59	160992.61	220424.01	335127.33	239904.02	401348.24	205076.21	103552.13	141077.04	1542.3	6680.4	125474.47	1256.54	22526.29	15094.67	3744.61	84064.66	95326.65	2603.11	85674.0	85809.65	83387.67
MW2421	Pyridine	C5H5N	115.9899	79.0422	0.5794	0.7068	1	--	HMDB0000926	C00747	--	1.0	-	-	93750.71	109463.42	123039.21	112138.52	81804.59	106473.45	90317.12	88743.82	74732.34	122905.06	125565.13	117560.38	71802.36	122804.36	93820.45	117604.28	108995.82	105379.89	98123.71	116410.85	106945.48	107543.97	106352.1
MW8978	Pyridalyl	C18H14Cl4F3NO3	555.9199	488.968	0.5718	4.0294	1	179101-81-6	--	C18484	--	1.0	-	-	3290.99	138456.44	99213.81	18586.11	34514.49	39007.26	32954.1	47275.14	25793.27	58932.19	44527.36	70768.89	2515.98	56228.69	54131.63	61780.27	57512.92	123771.9	111449.53	17008.08	41955.37	43623.95	40891.82
MW2420	Pyrazoxyfen	C20H16Cl2N2O3	401.0455	402.0538	0.5713	0.7258	1	71561110	--	C18556	--	1.0	-	-	18273.48	60594.47	26251.39	19268.81	13602.76	36199.37	13785.08	34216.42	13178.64	22072.68	8360.52	9587.99	4281.76	7060.43	7635.71	7187.11	10146.92	14653.12	12101.15	2526.95	20227.94	20031.32	20059.47
MW8977	Pyrantel pamoate	C23H16O6.C11H14N2S	633.1502	594.1825	0.9794	13.1675	1	22204-24-6	--	C07389	--	1.0	-	-	41732.38	54358.18	46064.04	18144.31	153.03	22716.28	128.16	27753.99	14735.04	86.55	14759.14	15514.21	16275.53	14680.01	14379.2	15000.33	14357.32	24152.39	13820.51	405.68	19802.77	19644.08	19250.04
MW8975	Pyraflufen-ethyl	C15H13Cl2F3N2O4	478.9734	412.0204	0.6238	4.8196	1	129630199	--	C18554	--	1.0	-	-	2714.41	901.69	1322.49	483.59	296.46	252.82	425.88	398.44	1282.3	954.2	1828.65	983.41	3645.25	3160.8	2093.73	4131.45	5623.4	23158.11	12869.59	918.31	8356.51	8377.08	8524.75
MW8974	Pyraclostrobin	C19H18ClN3O4	387.0982	387.0986	0.6438	3.9511	1	175013-18-0	--	C18561	72366.0	1.0	-	-	7179.44	5513.98	2139.75	2933.99	1208.81	1903.29	1233.75	2555.22	1458.61	1738.57	16962.61	19309.99	360.94	16964.11	13668.86	16374.73	17636.36	16805.81	14096.05	18222.95	7797.72	7880.8	7884.29
MW2419	Pyraclonil	C15H15ClN6	313.0975	314.1047	0.6424	2.0215	1	158353-15-2	--	C18613	--	1.0	-	-	30353.95	106213.75	25815.66	341.91	261.22	61846.87	304.59	68268.89	4562.27	28583.63	923.85	529.18	163.48	146.15	1470.48	2263.42	454.41	11244.74	13415.14	194.6	6990.01	7278.1	7074.43
MW2417	Pyochelin	C14H16N2O3S2	345.0353	324.0602	0.6163	2.9494	1	69772-54-9	--	C12037	--	1.0	-	-	1658.87	329.03	997.14	25341.3	5393.65	7946.2	1790.2	3878.64	6622.52	604.67	76939.54	10916.2	23473.13	80276.69	65562.93	76547.04	72541.97	19831.76	29598.61	35305.24	6750.35	9990.84	11098.1
MW2416	Purine	C5H4N4	119.0361	120.0436	0.6329	13.4501	1	120-73-0	HMDB0001366	C15587	6193.0	1.0	-	-	265184.04	266357.92	252320.56	264673.68	302803.15	270145.7	272055.63	269449.05	264468.91	303208.51	266077.02	153625.54	87082.89	265979.82	261635.51	266029.39	51315.65	279123.06	299311.32	248750.44	135711.52	187355.12	169370.79
MW2415	Punicalagin	C48H28O30	1083.059	1084.0665	0.6429	4.2359	1	--	HMDB0005795	--	--	1.0	-	-	5515.59	8831.4	847.13	1052.9	6644.21	1655.61	6118.11	1494.78	4385.47	271.69	65.91	1454.54	15541.94	162.73	68.51	68.57	89.13	544.8	288.59	75.85	5058.92	5235.9	5218.2
MW8972	Puerarin xyloside	C26H28O13	587.1164	548.153	0.6383	3.9994	1	--	--	C17057	--	1.0	-	-	1845.32	842.06	414.28	1738.13	500.42	287.97	135.46	274.61	224.66	152.88	39809.3	7488.96	18369.53	44496.5	37534.62	40268.77	57790.72	41285.65	33206.72	23285.62	11324.33	12156.79	12326.78
MW8971	Pterostilbene Phosphate	C16H17O6P	690.188	336.0763	0.5799	4.6268	1	959699-21-9	--	--	263501.0	1.0	-	-	3116448.89	1293610.9	2133702.72	751820.49	509857.63	603324.86	395716.6	563432.82	1892554.33	1337892.63	15626.21	10265.11	235456.84	269601.75	189041.91	206977.8	235910.32	374804.88	323553.3	327192.87	47063.96	49727.69	39773.68
MW8970	Pteroic acid	C14H12N6O3	354.1304	312.0971	0.609	2.069	1	119-24-4	--	C07582	--	1.0	-	-	11996.21	15737.94	8628.28	16083.69	13256.64	7963.99	2758.54	5149.71	11449.78	11527.43	12944.37	18730.13	7197.96	14110.65	12208.56	10002.75	10460.19	20911.38	14076.76	26830.99	12788.22	12792.79	12913.19
MW2414	PtdIns-(4)-P1 (1,2-dihexanoyl)	C21H40O16P2	647.1276	610.1792	0.6444	11.5148	1	--	--	--	45079.0	1.0	-	-	15634.72	31.26	8719.57	27.51	9982.87	32.04	10874.02	8414.75	12060.93	8809.86	55.31	51.57	10908.32	5570.91	6351.86	7241.16	47.54	44.28	37.23	11384.41	38162.51	39437.18	40296.1
MW8968	Psychotridine	C55H62N10	880.5491	862.5159	0.6243	13.1688	1	52617-25-1	--	C09233	--	1.0	-	-	2711.38	358.57	63.66	354.78	390.93	2125.59	2192.83	2458.64	2206.82	7550.57	6366.48	6780.55	5775.52	3632.86	1753.2	3589.28	2959.91	2119.23	4504.1	4884.17	5933.97	6580.26	6461.07
MW8967	Pseudoecgonyl-CoA	C30H49N8O18P3S	1001.164	934.2098	0.6205	10.7332	1	--	HMDB06403	C12450	--	1.0	-	-	267.98	4.63	8.77	16.28	13.68	147.93	7.59	4.84	224.67	124.86	87.95	23.39	3423.55	203.18	58.35	95.53	8.26	30.65	56.87	14.37	1388.1	1404.6	1284.57
MW8938	Protorifamycin I	C35H45NO10	662.2939	639.3043	0.636	5.0092	1	69239-55-0	HMDB39057	C12246	--	1.0	-	-	95.31	1029.5	74.21	190.42	1072.13	1280.67	251.3	215.28	3800.79	3414.22	19627.68	990.14	1919.15	24010.85	23144.39	20895.14	19792.36	8809.15	10035.45	2482.13	14814.06	14761.83	14029.71
MW2397	Protodeoxyviolaceinic acid;Protodeoxyviolaceinate	C21H15N3O2	681.2254	341.1164	0.6471	1.2617	1	--	--	C21131	--	1.0	-	-	39320.58	57255.42	11192.4	57298.95	83297.44	22141.33	63150.42	22791.05	70833.23	12930.47	4018.06	26851.72	8439.77	5440.07	6551.48	8085.24	5073.05	1591.44	4847.89	42967.56	18399.46	17101.24	18273.22
MW2396	Protoanemonin	C5H4O2	95.014	96.0211	0.6369	0.8465	1	--	HMDB0060503	C07090	--	1.0	-	-	213981.37	156547.82	292967.77	256712.96	136397.18	292757.53	128111.36	271331.79	198090.49	303106.66	204484.32	128362.58	254054.99	191718.72	188290.86	203552.5	200627.25	313086.33	299356.74	92478.07	210833.56	211590.47	210843.33
MW2395	Proteacin	C20H27NO12	458.1396	473.1533	0.6678	1.1625	1	22660-96-4	--	C08339	--	1.0	-	-	50778.34	15556.83	24074.51	18022.46	57149.32	26010.78	33848.67	24131.84	37712.4	15125.32	7471.02	18419.0	17007.63	4044.94	7613.37	5577.94	7265.78	16818.9	18762.2	15441.63	23049.25	23031.5	22315.03
MW2394	Prostaglandin J2	C20H30O4	333.2068	334.2144	0.5117	6.9783	2-search-DB	--	HMDB0002710	C05957	--	1.0	-	-	1026214.0	29006.95	257746.98	308323.31	188349.36	1018344.43	241086.43	774352.94	464577.21	316540.58	145482.27	16705.72	72890.53	198280.34	144151.8	198291.29	151714.17	183487.78	184480.44	632.32	340056.75	335513.93	333995.87
MW2393	Prostaglandin F2 Ethanolamide-d4	C22H35D4NO5	436.283	401.3079	0.7659	9.9693	1	--	--	--	96576.0	1.0	-	-	12535887.56	352131.21	395689.89	787578.83	526432.38	758695.09	494005.96	534078.77	1019285.47	383054.4	1625708.21	3282518.79	618700.03	1755422.73	1278076.88	2617416.1	3333195.55	662517.28	405046.6	3847925.6	1118028.25	1120658.39	1120883.98
MW2392	Prostaglandin E2 p-benzamidophenyl ester	C33H41NO6	568.2671	547.2934	0.5952	9.8251	1	57790-53-1	--	--	45605.0	1.0	-	-	851092.98	60954.77	7567.22	12896.86	7311.25	6007.4	7556.11	8283.74	97030.69	5186.68	3971.29	67505.05	99264.1	6131.01	3262.9	32088.89	47459.33	2009.57	1086.98	53246.96	32995.84	32167.85	31563.41
MW2387	Prostaglandin E1	C20H34O5	336.2258	354.2406	0.9912	7.6428	2-MetDNA	--	HMDB0001442	C04741	--	1.0	-	-	215016.34	1754.32	27666.16	19971.39	9555.52	80190.33	6218.54	72628.96	32020.73	35752.14	18234.38	481.76	33330.18	29597.68	18239.78	33494.73	35770.91	132050.44	99931.38	176.26	49297.57	50933.15	49704.84
MW8928	Prostaglandin D2-d9	C20H23D9O5	745.5525	361.2815	0.6394	4.8672	1	--	--	--	96462.0	1.0	-	-	6932.73	28462.38	90325.35	63615.43	14998.78	73415.82	22919.03	46902.42	18244.35	65491.34	2006.64	2238.01	21312.39	3291.83	2065.78	2226.77	5262.81	1316.5	2901.49	1620.34	3912.52	3820.2	3277.2
MW8929	Prostaglandin D2 serinol amide	C23H39NO6	467.3105	425.2777	0.5833	4.4766	1	--	--	--	45398.0	1.0	-	-	28610.0	4879.63	6742.89	1073.98	356.87	2692.51	2590.95	1700.37	6214.02	2269.75	6983.26	397.19	1632.41	13613.6	5302.68	7618.27	11602.79	15152.72	16143.41	8318.92	9656.7	9501.83	9152.63
MW2381	Prostaglandin D1	C20H34O5	707.4734	354.2406	0.9989	6.6127	2-MetDNA	--	HMDB0005102	C06438	--	1.0	-	-	1896859.55	191785.68	32806.43	57161.09	6327.53	559340.3	5788.05	528137.47	32794.91	79720.91	28881.41	102.66	19861.28	30352.6	26151.6	32158.48	33414.22	361744.45	343158.69	174853.41	118690.83	118557.27	116856.23
MW2377	Prostaglandin A2-d4	C20H26D4O4	675.4716	338.2395	0.6442	9.8031	1	--	--	--	96522.0	1.0	-	-	1674.13	2305.55	1188.86	5601.33	672.91	6551.91	1020.18	7393.58	111.68	5597.57	897.28	591.94	1590.41	673.54	422.61	637.05	712.06	894.32	450.99	469.73	3664.88	3784.13	3683.27
MW8923	Prorocentrolide	C56H85NO13	1043.6172	979.6021	0.6296	4.726	1	117120-34-0	--	C20023	--	1.0	-	-	82658.56	31815.0	123884.61	34814.88	48206.17	19285.94	50022.6	16450.6	189937.52	27367.75	1999.96	1996.73	3227.85	1136.74	2343.13	1824.53	3276.99	2593.29	1034.26	1879.49	2620.94	2421.62	1895.75
MW8922	Propylhexedrine	C10H21N	173.2013	155.1674	0.6465	13.2186	1	--	HMDB0015659	D05637	--	1.0	-	-	14173.89	13222.76	12066.77	11383.24	14203.34	12859.08	14626.6	11679.37	12901.77	12734.36	8014.28	6998.71	10853.73	12584.54	10677.62	11537.03	15247.57	14247.46	11818.51	12297.48	14725.47	14008.94	14699.54
MW2376	Propyleneglycol diacetate	C7H12O4	319.1394	160.0736	0.617	5.948	1	--	HMDB0041605	D05635	--	1.0	-	-	47706.79	3866.09	52644.26	33838.9	60409.54	102392.06	68899.7	108249.15	58273.29	60195.2	53567.54	10043.68	30162.22	40727.6	41430.5	50667.78	46768.9	8713.44	15704.52	504.7	42441.89	42832.44	42856.19
MW8921	Propylene;Propene	C3H6	102.1279	42.047	0.6474	13.0611	1	115-07-1	--	C11505	--	1.0	-	-	1275339.16	1423043.66	1357292.68	1196481.09	1271490.9	1396692.11	1336682.47	1364018.27	1203619.43	1247410.52	1041529.59	1134032.7	985615.89	1147340.44	1151585.66	272824.35	581848.31	1137002.55	1181498.04	513771.35	1195158.49	1176508.54	1183844.3
MW8919	Propionylcarnitine	C10H19NO4	218.1388	217.1314	0.7736	2.1503	2-search-DB	--	HMDB0000824	C03017	--	1.0	-	-	13091465.02	11078516.91	10467150.72	6235163.55	9063491.35	6538287.49	8209254.14	5631886.46	8562333.74	4020238.24	8432065.48	4350885.11	1524045.33	8878906.59	9461087.77	8928405.65	12194581.67	10302319.81	7386359.9	2137615.38	8213634.54	8208645.51	8054308.25
MW2374	Propiomazine	C20H24N2OS	375.1308	340.1609	0.7459	6.0764	1	--	HMDB0014915	C07405	--	1.0	-	-	98456.64	109408.94	224714.71	153769.91	262810.81	200780.46	211162.84	198838.97	272446.89	147513.79	177357.23	98182.8	25773.05	116050.21	165504.39	161677.83	159412.27	151538.28	178296.21	77844.15	131453.32	132470.42	132878.88
MW8917	Propiolic acid	C3H2O2	92.9918	70.0055	0.7	2.1919	2-MetDNA	471-25-0	--	C00804	4117.0	1.0	-	-	71127.95	107857.76	67619.48	103142.47	80977.01	111298.29	89906.06	90248.89	136733.46	163824.83	130376.56	67568.92	60654.41	113915.88	130901.63	124413.72	114809.32	141667.68	163140.97	57893.82	98277.04	104028.45	96168.8
MW2372	Propineb	C5H8N2S4.Zn	268.8688	287.8862	0.6095	13.2901	1	12071-83-9	--	C18450	--	1.0	-	-	74656.36	48631.92	77585.46	83759.88	89582.89	86531.09	82833.03	84199.26	85217.32	86520.33	79094.67	71967.11	87368.33	80443.96	87479.95	82018.65	77556.74	68621.28	76457.68	80390.39	86090.95	86261.18	86709.71
MW2371	Propicillin potassium;Brocillin	C18H21N2O5S.K	831.1548	416.0808	0.6314	2.1095	1	1245-44-9	--	C13110	--	1.0	-	-	62355.01	87632.74	99789.99	66758.72	64184.05	65447.71	75143.0	65311.08	94007.32	61797.67	112419.09	58344.75	6756.73	112483.49	108338.78	107185.18	119658.86	125404.38	106214.81	25955.01	96552.48	95657.66	95862.33
MW8914	Propericiazine	C21H23N3OS	748.347	365.1562	0.6201	3.7758	1	--	HMDB0015546	D01485	--	1.0	-	-	5471.25	2115.66	5418.75	1693.21	4295.28	5177.5	2823.9	3963.26	4127.08	2013.43	156262.0	6498.69	278802.3	183250.55	185812.21	212747.19	161853.02	98734.27	35426.91	1137.23	49870.96	48133.08	49299.41
MW8913	Propenyl-L-NIO	C10H19N3O2	465.2588	213.1477	0.6396	4.5019	1	--	--	--	45344.0	1.0	-	-	3967.98	204.9	138.18	952.11	275.1	105.62	48.59	101.77	48.62	54.89	6664.67	6785.71	89505.42	5917.79	8616.34	7965.86	5450.41	245.17	929.42	1468.76	10547.52	10513.21	10414.99
MW8912	Propenoyl-CoA;Acryloyl-CoA;Acrylyl-CoA	C24H38N7O17P3S	786.1097	821.1258	0.5645	4.8161	1	5776-58-9	HMDB02307	C00894	--	1.0	-	-	262426.66	152709.35	716173.06	493416.07	129020.93	221978.76	133417.53	144467.38	626962.41	496183.64	18235.16	71724.34	126597.58	42061.0	16289.12	15316.79	15048.89	192532.53	127474.58	25110.04	63345.23	58727.67	55693.8
MW8911	Propaquizafop	C22H22ClN3O5	482.0885	443.1248	0.6161	0.7543	1	111479-05-1	--	C18886	--	1.0	-	-	4893.05	21417.06	7163.69	6497.36	14174.83	22137.34	34802.77	15788.21	2860.58	7515.29	1417.32	1953.98	407.47	592.3	488.85	329.83	527.95	2405.14	404.21	565.0	3581.44	3478.47	3570.9
MW2369	Propanoylagmatine;Propionylagmatine	C8H18N4O	371.2909	186.1481	0.5086	11.2259	1	--	--	C02581	--	1.0	-	-	7944.9	8506.63	10826.68	11507.2	11069.5	9377.43	9149.24	10525.27	9459.05	11599.83	9773.26	12997.4	15038.75	10789.61	10487.27	11589.6	11718.25	11578.3	10680.45	12644.73	10706.55	11004.24	11031.29
MW2368	Propane-1,3-diol;1,3-Propanediol;Trimethylene glycol	C3H8O2	57.0344	76.0524	0.6438	1.32	1	504-63-2	--	C02457	--	1.0	-	-	371355.81	322081.35	390629.76	252243.74	182929.63	209509.77	524330.03	394257.58	310291.67	216006.44	443302.16	233783.42	317716.01	303591.68	227829.86	232340.45	239122.45	152456.13	375781.88	437830.64	287215.75	306707.6	315091.78
MW8909	Propamocarb hydrochloride	C9H21N2O2.Cl	224.1286	224.1292	0.6382	3.1023	1	25606-41-1	--	C18421	--	1.0	-	-	431.22	1374.58	1251.81	256.06	228.8	261.94	139.6	575.6	214.41	290.49	13221.11	673.25	970.77	12623.11	8079.78	12451.72	13294.25	2407.86	2498.39	533.17	4990.81	5106.92	5065.51
MW2366	Proline	C5H9NO2	97.0295	115.0633	0.581	0.8466	1	609-36-9	--	C16435	--	1.0	-	-	73034.9	56661.95	123080.56	154298.75	32474.57	99951.27	35268.17	114176.9	84092.72	174145.05	69101.8	63443.97	93026.7	69894.7	85057.17	85031.03	84412.96	116987.71	118531.8	30942.66	72574.3	75647.08	69644.79
MW8906	Proguanil	C11H16ClN5	507.2262	253.1094	0.6479	2.4775	1	--	HMDB0015263	--	--	1.0	-	-	8382.02	517.94	549.37	3988.13	700.4	307.28	4862.92	611.05	101.57	426.52	104645.26	95915.91	336681.9	86970.78	96199.26	110052.28	89572.2	48006.67	44452.21	66453.47	60977.0	61840.87	60925.05
MW8905	Profenofos	C11H15BrClO3PS	416.9072	371.9351	0.5945	4.1255	1	41198-08-7	--	C18404	72212.0	1.0	-	-	643.29	705.35	1109.62	2018.4	1255.81	194.21	883.5	1078.58	433.04	181.52	16662.25	11547.94	2026.63	8647.28	14391.69	15452.75	11396.61	23142.35	22184.94	8507.52	5240.56	4990.19	5060.19
MW2361	Procarbazine	C12H19N3O	205.1231	221.1528	0.681	7.6982	1	--	HMDB0015299	C07402	--	1.0	-	-	6051.4	8312.94	3384.02	4737.26	3185.61	2930.07	5806.05	6672.7	4764.02	6182.05	5189.48	4633.49	7364.33	4266.13	5016.63	5359.71	4810.33	8410.96	6238.84	7665.16	8241.73	8072.14	7931.08
MW2360	Probucol	C31H48O2S2	553.2578	516.3096	0.6298	7.0779	1	--	HMDB0015537	C07373	--	1.0	-	-	4745.51	11328.05	12382.17	10034.85	5385.2	4390.94	8099.6	3896.47	7740.14	6534.3	11809.04	12803.86	9243.97	12312.13	11620.19	11124.09	11829.77	7565.73	10103.34	11184.75	11591.87	11288.6	11110.28
MW8904	Probenazole	C10H9NO3S	270.0434	223.0303	0.6297	2.3222	1	27605-76-1	--	C18483	--	1.0	-	-	31.12	20.2	207.26	85.09	171.44	87.05	173.49	202.56	29.94	151.29	42511.16	322.25	6203.86	45714.68	36143.48	34936.2	68193.78	4468.27	3921.29	1204.29	15198.71	15168.68	15412.4
MW8903	Proanthocyanidin A2	C30H24O12	643.0797	576.1268	0.632	4.0938	1	--	HMDB0037655	C10237	--	1.0	-	-	44882.91	20088.14	31255.98	24242.97	30529.02	6482.22	18290.66	4706.11	11283.88	17844.75	46201.67	77640.02	3797.15	52801.06	47166.14	57574.27	60704.91	62004.71	54427.64	57941.62	97673.51	98507.29	97491.7
MW8902	Proacacipetalin;3-Butenenitrile, 2-(beta-D-glucopyranosyloxy)-3-methyl-, (S)-	C11H17NO6	301.1393	259.1056	0.6418	2.0517	1	66871-89-4	--	C08338	--	1.0	-	-	62199.86	112114.22	110107.67	73969.02	79653.95	67207.61	69891.23	167541.5	43205.44	486928.92	41826.85	39589.82	42592.18	45352.25	41284.72	42778.79	46573.3	61698.23	37077.06	22799.22	74882.95	74293.51	71771.69
MW2359	Pro Val Arg	C16H30N6O4	325.2382	370.2329	0.9333	6.7955	1	--	--	--	20600.0	1.0	-	-	854440.02	73186.93	330341.38	465406.89	273730.65	954927.59	278742.26	858873.19	353306.1	595206.42	804592.36	71052.36	348806.09	800628.15	724746.24	827003.84	850231.1	655697.96	654844.07	30552.27	556207.69	556878.34	554959.43
MW8900	Pro Val	C10H18N2O3	261.1449	214.1317	0.6211	3.2286	1	20488-27-1	--	--	23999.0	1.0	-	-	2909.83	100620.39	58464.71	60379.83	85247.62	65120.52	79151.0	66178.26	83752.21	2330.54	595075.16	7755.47	299257.17	828364.43	754879.62	741070.26	632266.56	34978.72	3785.0	100657.33	8864.04	12460.09	13193.6
MW2357	Pro Thr Val Asn Cys	C21H36N6O8S	553.206	532.2315	0.6376	9.5121	1	--	--	--	264900.0	1.0	-	-	29473.29	222.82	1538.79	2955.14	1354.79	1257.96	228.77	1262.33	458.35	775.35	9402.92	19461.47	1997.3	18147.23	12222.79	27591.82	32121.73	28079.67	18783.67	34131.5	3999.61	4256.93	4429.45
MW2356	Pro Thr Leu	C15H27N3O5	310.1769	329.1951	0.6259	13.2222	1	--	--	--	19982.0	1.0	-	-	15326.09	72868.39	15915.95	70487.0	28060.79	21269.75	19409.27	25917.24	26095.84	22267.3	71850.45	157080.34	105325.94	78734.38	88909.48	85376.12	129005.75	130798.48	239042.71	220082.66	70271.14	68481.48	74608.14
MW2355	Pro Ser Glu	C13H21N3O7	368.0875	331.138	0.5773	1.5445	1	--	--	--	16356.0	1.0	-	-	115625.74	92390.75	80553.86	130949.01	140857.18	63801.69	134551.65	58063.6	79264.79	85902.7	26979.56	53828.15	35092.7	25149.66	34431.42	23351.76	27429.35	21429.42	18611.56	150927.57	77833.84	78693.71	78920.06
MW8898	Pro Pro Phe	C19H25N3O4	359.1841	359.1845	0.6402	4.0945	1	--	--	--	19234.0	1.0	-	-	24508.86	14658.88	49834.64	40191.94	40647.92	31486.48	45649.69	29169.78	17706.97	20309.04	50016.37	38055.32	39429.64	42636.51	46279.75	48070.6	52496.95	66407.93	70883.9	9603.78	39605.4	39565.07	38917.06
MW8897	Pro Pro Lys Phe Asp	C29H42N6O8	644.3402	602.3064	0.6481	4.2934	1	--	--	--	264853.0	1.0	-	-	64495.25	58490.68	63346.89	45085.13	25728.83	19075.18	24988.94	17685.45	7206.97	14928.9	5149.1	86646.17	70567.04	3859.17	7348.37	4847.22	7095.47	40653.08	34997.98	28893.77	49890.02	51652.84	48862.01
MW8896	Pro Pro Ile	C16H27N3O4	367.2338	325.2002	0.6375	0.9025	1	--	--	--	19177.0	1.0	-	-	23360.09	34114.94	15580.29	20459.55	37744.99	13100.27	24948.67	13577.95	15230.16	6881.89	10470.85	19370.51	8429.73	11225.52	12491.11	10579.89	9622.76	2697.94	2390.42	24489.06	15023.81	15091.61	15022.58
MW8895	Pro Pro His	C16H23N5O4	391.2085	349.175	0.6289	6.7865	1	--	--	--	19880.0	1.0	-	-	262360.39	6118.76	31877.59	27728.93	33553.67	73611.12	44508.28	103277.32	61661.63	87553.93	71945.22	5637.85	40693.55	77037.97	66898.95	78063.04	79313.19	129755.44	106774.24	462.12	102530.54	104014.05	105559.23
MW2353	Pro Pro Gly	C12H19N3O4	306.0855	269.1376	0.5956	0.8222	1	--	--	--	16287.0	1.0	-	-	15303.07	21321.41	25992.09	34857.63	53834.65	8671.87	57425.62	8576.49	18286.88	14361.26	14813.15	31331.14	18429.58	14092.55	14824.98	11532.15	15448.92	11214.11	12714.41	31339.81	15995.34	15565.1	15512.72
MW2351	Pro Pro Asp Gln Gln	C24H37N7O10	604.2324	583.2602	0.5282	1.1199	1	--	--	--	264662.0	1.0	-	-	62936.49	284224.16	30875.78	192666.83	175241.85	26808.58	92966.13	67506.27	44716.64	22859.65	4440.5	24966.71	758.02	1556.77	4030.2	4527.29	4765.34	5408.57	4835.32	33885.11	26138.84	25131.78	25332.13
MW2350	Pro Pro Ala Ala Ile	C22H37N5O6	486.2737	467.2744	0.6246	7.0779	1	--	--	--	264803.0	1.0	-	-	69675.88	118331.13	141060.31	89042.13	75009.36	93952.22	80788.81	64303.57	93014.66	86005.49	135904.92	125459.91	138798.6	125274.4	124163.63	127479.72	128779.92	114874.48	124155.73	112233.31	119215.76	118380.41	117961.53
MW2349	Pro Leu Gly	C13H23N3O4	266.1509	285.1689	0.6419	13.2068	1	33676-42-5	--	--	21515.0	1.0	-	-	76281.16	109133.0	35271.18	383574.57	39358.95	45504.75	63036.02	43387.89	39968.46	55213.44	161147.25	527107.75	99142.15	131072.24	180853.31	134064.08	391577.78	275907.82	724169.67	459490.03	197487.76	170538.18	183953.33
MW2348	Pro Ile Lys	C17H32N4O4	377.2176	356.2424	0.6093	4.4359	1	--	--	--	22672.0	1.0	-	-	72570.58	11164.77	16613.43	58986.57	16348.38	39039.73	19277.53	33561.65	28316.98	32045.07	27950.93	2865.73	586.09	41419.95	28362.2	28299.42	35059.68	32076.38	28846.19	326.35	27913.36	27844.35	28238.59
MW8880	Pro Ile	C11H20N2O3	229.1546	228.1474	0.6456	1.3452	2-search-DB	--	--	--	23879.0	1.0	-	-	595609.37	978140.98	812701.53	951275.66	1256390.57	938150.29	1163343.01	3616080.56	958617.46	1007528.11	1038727.63	519505.49	704794.4	846757.05	896280.25	1019904.45	785743.84	753573.85	818243.97	626878.43	766087.52	760360.54	787126.65
MW8878	Pro His Ser	C14H21N5O5	340.1618	339.1543	0.6338	3.8416	1	--	--	--	16926.0	1.0	-	-	1097.58	860.59	408.37	1413.34	266.92	274.0	261.68	202.48	544.47	137.61	308.81	4931.96	33926.98	190.07	353.19	500.01	174.73	234.15	970.6	228.35	3297.48	3428.81	3370.24
MW8874	Pro Gly Met Ile Lys	C24H44N6O6S	591.3172	544.3043	0.6426	4.2167	1	--	--	--	264599.0	1.0	-	-	42838.91	37970.2	25895.43	54781.04	17721.22	47312.79	21571.08	44029.9	8379.91	19357.29	4312.61	62195.04	20922.34	2628.06	2099.05	2677.34	5852.26	54237.39	42090.3	7543.87	37759.06	37039.47	35709.05
MW8873	Pro Gly Leu	C13H23N3O4	324.129	285.1689	0.5043	2.2007	2-search-DB	--	--	--	18272.0	1.0	-	-	191827.17	74630.95	89983.51	83650.51	79307.31	56764.7	42577.37	55251.55	60005.63	83628.05	99607.62	147877.32	85279.49	119936.83	110285.19	167347.83	129582.09	121293.27	135819.93	125828.75	138090.56	126844.81	129301.89
MW8872	Pro Gly His	C13H19N5O4	292.1408	309.1437	0.6165	2.46	1	--	--	--	18632.0	1.0	-	-	175.91	9458.55	948.8	274.29	6235.75	142.97	135.65	192.33	9146.17	262.37	607.23	680.99	273822.11	9461.71	11829.57	233.38	12543.3	3352.86	983.37	18084.21	9663.42	9670.09	9316.56
MW8871	Pro Gly Asn	C11H18N4O5	350.1431	286.1277	0.6146	4.9486	1	--	--	--	16893.0	1.0	-	-	2598.17	9396.92	23195.71	13395.01	9319.25	106466.22	10297.36	104947.97	26774.92	821.74	9437.58	2388.75	4128.08	6666.27	5134.61	8535.22	7705.1	1806.54	2011.03	1003.25	15652.86	15518.21	15657.3
MW2346	Pro Glu Ile	C16H27N3O6	338.1712	357.19	0.584	5.0032	1	--	--	--	16833.0	1.0	-	-	3955.95	2483.28	1982.07	3588.35	1732.05	5078.56	1699.89	1942.18	2197.25	3071.43	172496.36	166476.26	209091.29	171407.46	169368.44	165020.28	175864.53	48435.94	47565.18	276137.98	88994.06	89379.24	89371.86
MW8868	Pro Glu Glu Leu Lys	C27H46N6O10	632.3633	614.3275	0.5625	4.8698	1	--	--	--	264408.0	1.0	-	-	69274.51	95831.96	104936.18	55140.43	91124.48	67229.86	39173.42	67802.93	148343.88	68746.97	4347.27	2167.2	19589.04	2612.14	3162.67	6303.81	5317.21	22392.13	15091.37	1086.94	31274.22	33401.86	33754.7
MW2344	Pro Glu Glu	C15H23N3O8	372.1408	373.1485	0.6149	4.2936	1	--	--	--	22732.0	1.0	-	-	14439.78	24087.92	11102.1	25827.05	9704.82	8340.15	26893.77	7798.98	23729.85	4345.49	38110.27	10254.53	4275.47	41791.86	36288.97	55504.24	56656.19	34492.89	32673.36	8358.36	15686.53	16572.76	16728.25
MW2342	Pro Cys Val	C13H23N3O4S1	336.1404	317.1409	0.6084	0.8123	1	--	--	--	21422.0	1.0	-	-	15572.93	15369.87	11961.26	13253.18	34862.71	13277.41	19370.44	12486.36	29538.71	7036.44	9728.95	69832.08	18516.83	11288.5	14027.7	10710.54	11736.14	17478.07	16162.07	82367.93	17616.71	17762.18	18451.39
MW8864	Pro Asp Trp	C20H24N4O6	871.3043	416.1696	0.5806	4.7759	1	--	--	--	17327.0	1.0	-	-	85749.9	21561.55	96236.84	40849.65	62766.5	54346.0	39575.94	35823.07	65897.15	57406.32	6619.47	2305.14	6339.31	505.28	3310.66	830.1	4967.99	18542.75	10772.5	743.09	9000.66	9180.13	8863.52
MW2341	Pro Asp His	C15H21N5O6	348.1316	367.1492	0.6256	1.221	1	--	--	--	16702.0	1.0	-	-	47405.05	158166.5	100899.52	122026.97	107910.3	43112.75	188119.23	37276.59	126053.84	4810.84	14393.67	30200.67	11521.54	21659.26	20554.72	19293.02	20308.21	15486.35	15716.16	105563.76	53262.25	54383.52	65995.04
MW2340	Pro Asp Asp	C13H19N3O8	361.1366	345.1172	0.6464	0.8076	1	--	--	--	16126.0	1.0	-	-	149350.15	119656.09	104296.87	124038.01	137911.31	101614.97	140892.83	93510.22	123541.62	103871.32	94061.8	243830.28	117443.41	91594.74	91877.65	91912.54	85461.9	120909.22	131127.26	188692.5	134733.17	133920.92	133900.23
MW8863	Pro Asp Asn	C13H20N4O7	421.0526	344.1332	0.6265	1.4603	1	--	--	--	16216.0	1.0	-	-	18567.98	239805.67	63233.08	141727.8	176503.97	183864.64	181595.68	155098.26	108906.07	28959.36	109154.79	149550.41	3328.26	97123.16	110704.15	77662.54	89934.92	64765.2	77767.38	104133.36	41747.1	53921.03	49019.71
MW2338	Pro Asp Arg	C15H26N6O6	423.1416	386.1914	0.5384	4.6851	1	--	--	--	21036.0	1.0	-	-	35564.66	35680.07	62109.56	46142.86	56380.94	79301.53	57897.31	67370.64	70600.45	52450.06	40346.39	24524.72	1978.78	41761.59	35281.53	41870.31	43781.64	47860.02	47825.45	13571.81	49223.26	49585.92	49232.61
MW2337	Pro Asp Ala Lys Ser	C21H36N6O9	497.2361	516.2544	0.6258	5.0423	1	--	--	--	264262.0	1.0	-	-	2648.43	1025.33	1239.64	3709.6	15757.87	15944.45	16066.06	18095.33	1970.42	24469.89	6933.73	4478.61	3368.0	6103.36	6713.37	5871.0	8705.28	3202.02	3016.77	295.87	7262.58	7455.61	7472.63
MW2336	Pro Asn Gln Met Ser	C22H37N7O9S	594.2368	575.2373	0.619	6.0738	1	--	--	--	264511.0	1.0	-	-	220600.18	54066.7	33862.1	12700.08	94722.56	175621.71	80523.21	191363.18	290855.72	214565.59	197829.06	387.89	9073.99	204089.09	172985.31	199237.72	252233.86	18788.66	20615.64	407.88	126213.1	141278.35	131741.54
MW8862	Pro Ala Leu	C14H25N3O4	264.1706	299.1845	0.6498	1.4983	1	--	--	--	17673.0	1.0	-	-	97537.95	227051.78	246863.57	162782.57	175649.25	148397.9	156001.84	151982.49	176847.13	163299.05	148749.2	122232.81	132764.36	142077.78	150010.41	172734.26	159164.79	144541.92	148441.81	98829.78	166909.73	164249.57	161362.63
MW2335	Pristinamycin IB;Vernamycin B beta;Efepristin;4-[N-Methyl-4-(methylamino)-L-phenylalanine]virginiamycin S1	C44H52N8O10	868.3968	852.3806	0.543	4.2157	1	57206-54-9	--	C11616	--	1.0	-	-	22635.78	40913.79	8862.54	10326.24	17621.21	9774.65	17041.15	8779.24	8923.99	6970.62	11113.76	1705.48	1078.09	12615.27	11180.21	13270.01	14385.02	11039.29	13221.06	1045.17	9987.61	9700.51	10004.54
MW2334	Pristinamycin IA;Vernamycin B alpha;Mikamycin B;4-[4-(Dimethylamino)-N-methyl-L-phenylalanine]virginiamycin S1;Streptogramin B	C45H54N8O10	947.3643	866.3963	0.5976	3.8577	1	3131-03-1	--	C11615	--	1.0	-	-	5255.09	2574.18	346.16	3337.44	1840.09	891.38	2112.71	647.68	569.79	229.17	113.57	35202.8	11125.13	2361.82	233.19	228.06	293.8	217.6	197.42	17717.29	5287.15	5335.64	5348.1
MW2333	Pretilachlor	C17H26ClNO2	327.1844	311.1652	0.6422	13.2346	1	51218-49-6	--	C14517	--	1.0	-	-	115956.64	239569.96	75109.3	72151.31	93820.04	122890.03	151969.22	93477.89	102186.66	106805.21	251842.13	183320.39	245433.88	286061.13	203049.98	227945.37	171199.11	195204.3	206778.62	308062.6	172897.66	191367.64	182211.28
MW8859	Prephytoene diphosphate	C40H68O7P2	764.4772	722.444	0.8753	3.8169	1	--	HMDB03023	C03427	--	1.0	-	-	21461.91	164.94	11106.54	633.45	140.01	11588.91	8002.55	11756.55	178.91	14112.09	35494.72	64936.44	133657.55	48971.83	34120.02	45683.84	67127.66	63567.23	22175.87	89948.3	43406.72	42649.05	43144.55
MW8858	Prepacifenol epoxide	C15H21Br2ClO3	480.9192	441.9546	0.56	1.3264	1	55304-01-3	--	C17127	--	1.0	-	-	2537.18	17910.96	14699.47	28272.34	14957.79	24375.64	12163.79	24275.75	17124.83	11035.59	5929.29	10506.32	2594.85	8671.88	4380.06	10782.26	8732.04	9252.25	11533.68	2106.14	13546.17	13144.94	12985.72
MW8857	Prenoxdiazine	C23H27N3O	476.0905	361.2154	0.645	1.3083	1	47543657	--	D07392	--	1.0	-	-	79211.29	38001.61	46157.63	27080.36	30314.56	4644.86	22701.42	25334.26	80623.81	15220.23	31600.27	49340.58	1541.26	40205.49	23462.33	43536.39	45747.78	86110.58	69984.1	53856.82	66580.08	71778.56	71594.31
MW2330	Premithramycin A3	C41H52O18	831.3086	832.3154	0.6297	0.9362	1	--	--	C12387	--	1.0	-	-	19011.62	20241.84	25704.49	12558.17	12730.15	7877.78	14486.24	9724.91	10638.87	9866.65	17799.61	25936.32	4439.79	19163.95	19714.07	13062.73	17773.76	16710.96	17620.13	9702.85	15711.13	15969.65	15420.48
MW2329	Pregnenolone	C21H32O2	352.2207	316.2402	0.6247	5.8989	2-MetDNA	145-13-1	HMDB0000253	C01953	24078.0	1.0	-	-	1569971.35	68406.4	457967.14	522939.52	695305.53	1694062.86	727127.27	1539374.49	1414106.34	1079070.32	739304.62	56935.58	229422.3	740726.88	731199.11	753068.72	766108.41	379687.84	527028.44	11860.22	910522.65	915482.57	912612.65
MW8855	Pregnane;5beta-Pregnane	C21H36	335.2964	288.2817	0.513	6.7034	1	481-26-5	--	C01523	--	1.0	-	-	9333.35	12953.48	12727.24	8985.07	10861.25	10039.82	4792.72	9775.29	10185.27	9679.93	10049.84	4779.98	6759.45	11751.77	12859.21	4690.11	10325.68	2446.16	7166.0	4729.27	10378.45	11908.11	11013.74
MW8854	Pregnan-21-al	C21H34O	417.1361	302.261	0.6396	0.8181	1	--	--	C00891	--	1.0	-	-	34843.81	33020.54	23801.74	38346.15	17174.8	15231.99	17534.35	2641.58	17962.53	6259.8	39150.58	29717.42	8959.87	36426.96	35060.17	37814.62	39642.23	43292.17	46173.96	26062.87	28494.41	28286.52	28110.62
MW8853	Pregnan-20-one, 17-(acetyloxy)-3-hydroxy-6-methyl-, (3b,5b,6a)-	C24H38O4	413.2671	390.277	0.589	13.1929	1	71315-40-7	--	--	1089.0	1.0	-	-	69195.69	55337.1	48420.39	45426.54	33869.57	40270.96	42882.57	36123.04	35851.58	25932.08	22279.11	27412.33	39620.89	40413.13	27549.26	32096.16	35018.58	40979.9	34844.86	34806.81	20643.29	22512.56	18639.78
MW2327	Precorrin 6X;Precorrin 6A	C44H54N4O16	931.3048	894.3535	0.561	1.6012	1	--	--	C06320	--	1.0	-	-	17409.76	8116.08	35611.78	16294.54	6109.77	17566.85	3994.55	15979.97	9681.82	7335.8	22913.07	36424.89	12938.44	17981.94	21793.57	26467.2	20070.59	7727.17	7545.99	38630.15	12650.27	13764.8	13826.71
MW2326	Precorrin 2;Dihydrosirohydrochlorin	C42H48N4O16	880.3251	864.3065	0.6243	3.9476	1	82542-92-5	--	C02463	--	1.0	-	-	137.92	258.21	4925.1	587.71	1624.21	3044.75	133.25	86.17	4104.45	4992.78	25136.83	1008.7	10101.39	21489.34	18552.91	22520.18	20527.54	16985.03	14351.26	320.48	9451.3	9234.24	9188.37
MW2324	Prebetanin	C24H26N2O16S	667.0486	630.1003	0.6378	4.5272	1	13798-16-8	HMDB29411	C08567	--	1.0	-	-	5209.37	244.87	251.92	1336.99	412.33	283.3	1772.65	268.47	276.63	3365.56	30765.66	262.97	8406.17	28890.66	28029.78	26554.58	29155.06	8219.65	1261.45	11063.06	1907.7	1736.1	1853.3
MW8852	Pramipexole	C10H17N3S	440.2635	211.1143	0.5855	4.9034	1	--	HMDB0014557	D05575	--	1.0	-	-	495.8	2079.04	413.81	905.39	510.74	446.86	403.17	478.64	615.01	237.04	274.6	361.5	1534.64	222.59	470.78	230.08	281.18	1519.02	1278.92	113.33	3943.22	3889.38	3838.74
MW2321	Pradimicinone I	C28H23NO11	530.1092	549.1271	0.6486	1.4327	1	116276-03-0	--	C06777	--	1.0	-	-	1539.04	5094.73	1075.53	962.04	331.97	1441.33	357.56	2702.74	2785.48	1105.76	45208.71	21362.66	7955.65	56170.45	53335.83	52004.96	47646.84	132947.05	44203.36	17105.73	12606.01	12644.84	12978.3
MW8849	Pradimicin C;Benanomicin B	C39H42N2O18	809.2369	826.2433	0.5364	4.1098	1	116249-66-2	--	C06786	--	1.0	-	-	3969.67	3639.57	1446.96	10786.12	2307.24	3396.83	2356.85	1732.69	8339.47	2338.29	46885.6	43243.87	78921.2	58915.1	50308.22	48153.46	55363.8	48952.33	57508.19	46928.25	29363.44	28344.27	28511.69
MW8847	Potassium bis(2-hydroxyethyl)dithiocarbamate;Bis(2-hydroxyethyl)dithiocarbamic acid, potassium salt	C5H10NO2S2.K	201.9756	218.979	0.6384	13.3118	1	23746-34-1	--	C19511	--	1.0	-	-	68838.17	75966.33	66383.56	64868.22	75336.62	73724.26	76061.76	79574.74	27393.95	65830.92	69041.3	56582.08	52860.4	50526.86	41733.73	52319.42	43268.21	39383.26	46503.63	46942.4	64990.21	66728.13	64592.66
MW8846	Portulacaxanthin III	C11H12N2O6	554.1723	268.0695	0.6166	0.7787	1	135545-99-2	--	C08566	--	1.0	-	-	2196256.29	3553904.38	1331944.48	2687810.82	2883251.58	1430301.54	2859212.24	1451344.86	1344168.83	1483253.57	225563.38	903822.81	295164.32	267974.65	259633.08	260738.47	258289.13	254070.54	266250.42	485839.38	881490.42	875137.44	874506.36
MW2311	Ponceau 3R	C19H16N2O7S2.2Na	513.0175	494.0194	0.6004	2.3335	1	3564-09-8	HMDB32738	C19293	--	1.0	-	-	35389.59	40827.35	44280.11	55983.65	84751.21	32054.01	101066.74	34320.27	62672.96	47814.09	27961.23	40919.64	3307.02	27559.23	28349.93	25898.7	26384.54	30828.82	34627.81	29294.89	44589.19	45075.65	45552.46
MW8845	Polythiazide	C11H13ClF3N3O4S3	502.9866	438.9709	0.6437	4.796	1	--	HMDB0015419	C07766	--	1.0	-	-	117332.55	39796.45	158523.89	93861.59	67319.9	56523.57	49588.8	65676.76	143064.72	82390.01	928.1	3691.77	13653.78	9385.05	11551.9	832.82	4928.11	3757.18	2853.32	648.57	18023.21	19552.82	19862.29
MW8844	Polyoxyethylene 40 monostearate	C20H40O3	346.3319	328.2977	0.8815	7.501	1	--	HMDB0032477	D01542	--	1.0	-	-	80370.49	78660.57	66148.22	50003.89	79770.57	47949.01	61889.71	58282.14	67152.93	63991.27	62979.72	65602.76	39094.95	56325.39	51163.35	61807.24	76018.66	47158.59	54961.5	94130.43	76982.13	78159.32	76673.97
MW8842	Polygodial	C15H22O2	235.1693	234.162	0.6479	10.1848	1	6754-20-7	--	C09712	--	1.0	-	-	35350.63	62625.93	38351.7	55614.73	33175.19	61904.32	39716.1	46683.45	43620.86	39306.74	48616.79	34138.27	57347.12	34399.73	54046.86	61749.21	27962.72	39461.14	36890.28	31478.33	50663.19	51856.51	46433.82
MW8841	Polidocanol;Nonaethylene glycol monododecyl ether	C30H62O10	600.4681	582.4343	0.6466	11.2898	1	3055-99-0	--	C13493	--	1.0	-	-	649886.54	538564.58	566377.75	587166.84	588949.49	552545.49	589371.48	553866.77	539498.81	497643.91	449656.17	459305.37	161640.01	460228.17	504018.81	477573.36	325096.91	470720.77	498698.51	455076.45	447256.45	420839.88	409309.75
MW2306	Podophyllotoxin (Podophyllum)	C22H22O8	827.2575	414.1315	0.5791	8.8975	1	518-28-5	--	--	2039.0	1.0	-	-	14711.08	11322.14	4927.25	9639.72	7669.73	15454.64	12925.47	10537.52	1148.92	9127.21	7094.92	12445.06	6817.93	5301.62	4256.45	5780.87	5351.16	3665.6	3311.95	7792.23	15174.14	14881.48	14449.49
MW2305	Podolide	C19H22O5	365.115	330.1467	0.9581	0.7957	1	55786-36-2	--	C09173	--	1.0	-	-	389004.78	992947.94	213232.08	442655.68	457785.51	375298.32	445781.64	385088.61	254279.43	127941.62	278231.75	454286.91	67671.32	256745.92	271944.4	302775.49	290083.68	187379.85	189459.29	515551.87	323861.34	326397.84	324664.98
MW2304	Plutonium	Pu	257.0483	238.0496	0.6309	8.3575	1	7440-07-5	--	C19159	--	1.0	-	-	15604.16	21120.22	22338.9	23892.25	21347.34	12834.86	18097.31	16245.4	17907.94	19181.55	17031.19	18847.8	23041.22	21363.45	22973.74	17282.9	24811.13	21630.5	21851.12	19594.55	17481.0	17795.19	17776.82
MW2303	Plocamene D	C10H13Cl3	274.9578	238.0083	0.5797	13.8161	1	62560-51-4	--	C17105	--	1.0	-	-	79746.74	70631.2	55274.94	34826.2	75888.32	64397.35	61104.18	26275.56	40745.68	42394.21	21756.34	29778.17	32535.06	92512.73	19951.92	44358.45	112941.96	40575.82	19076.79	50317.58	44698.56	44869.74	46835.08
MW2302	Pleurostyline	C25H29N3O2	419.2462	403.226	0.5866	6.2068	1	67257-79-8	--	C10612	--	1.0	-	-	13671.53	9106.13	7115.09	15239.49	2675.88	16787.71	3123.86	22607.8	5217.27	2548.04	21142.99	3053.32	7491.61	34236.12	22352.21	25645.02	30166.29	24607.74	15029.82	771.8	12394.28	12182.39	12164.26
MW8837	Plastoquinol-1	C13H18O2	224.1647	206.1307	0.6427	2.5315	1	--	--	C02185	--	1.0	-	-	22025.82	16943.57	21336.69	14815.32	23913.94	21158.85	22584.64	15267.95	17919.26	12566.41	21054.28	15646.6	5451.53	24895.85	19346.63	28050.23	26467.18	18128.87	16958.41	3844.25	20326.38	20286.88	20040.29
MW8836	Plantagoside	C21H22O12	580.9859	466.1111	0.6379	4.7509	1	78708-33-5	--	C17531	--	1.0	-	-	84365.65	35410.16	97840.93	88754.87	83052.73	60486.84	41346.1	64553.52	62243.14	98043.69	22466.16	6157.05	32514.68	5243.79	23907.7	17874.15	22898.35	29168.77	11734.31	7637.88	26163.94	26441.82	25552.09
MW8835	Plakinamine B	C31H50N2	489.3615	450.3974	0.5942	10.3922	1	93474-14-7	--	C16895	--	1.0	-	-	25.95	29.54	17.59	11.33	19.0	13.2	6.51	84.0	7.76	9.73	5.99	21.79	17.67	3.8	4.62	23.52	9.74	10.99	23.57	106.98	1026.72	1031.48	1017.2
MW8834	Pivampicillin	C22H29N3O6S	965.3179	463.1777	0.627	4.967	1	--	HMDB0015542	C11750	--	1.0	-	-	75373.1	88789.06	129599.7	196041.16	98255.37	109528.11	100127.91	115037.04	76482.49	92107.89	86740.45	107035.09	36058.91	91165.69	91271.63	93448.02	95904.5	128270.36	111436.06	44766.94	106245.59	106970.7	106951.5
MW2301	Pitavastatin	C25H24FNO4	458.1171	421.1689	0.6193	4.6192	1	147511-69-1	HMDB41991	C13334	--	1.0	-	-	25298.96	24821.31	36098.46	28539.17	15888.56	17484.91	15674.97	25302.21	22224.22	22994.39	16017.12	31295.3	14581.9	18383.27	15798.43	18947.8	16560.97	24115.38	30225.03	22831.97	23636.75	25229.05	24310.37
MW8831	Pipobroman	C10H16Br2N2O2	371.9921	353.9579	0.6259	3.9782	1	--	HMDB0014381	C07362	--	1.0	-	-	619.95	42550.55	5805.06	8495.29	32389.42	11261.96	38634.47	8552.36	13882.11	2942.92	796.28	28600.9	92945.71	996.1	276.83	136.27	270.23	3319.21	4701.19	2452.69	47968.54	48169.24	47903.91
MW8830	Piperonyl sulfoxide	C18H28O3S	649.359	324.1759	0.6427	4.767	1	120627	--	C19147	--	1.0	-	-	1386306.8	464904.31	1795215.61	574203.44	709291.39	811078.1	776399.88	686407.18	1745179.01	703997.09	107274.23	66713.1	117940.68	118270.04	84766.55	125625.44	149796.76	841086.69	516489.14	3391.81	315753.23	316853.79	311380.87
MW8824	Piperaduncin B	C29H30O8	1030.4177	506.1941	0.5261	2.4624	1	155023-55-5	--	C09829	--	1.0	-	-	4290.65	177.19	5878.94	183.98	9158.96	176.47	6263.29	10119.23	417.65	10582.75	19812.06	25456.02	159467.34	19508.54	17983.52	21400.91	15237.09	4813.41	3945.91	6504.38	4330.4	5065.2	4867.16
MW2298	Pipazethate	C21H25N3O3S	436.1114	399.1617	0.5694	4.8182	1	--	HMDB0015686	D05484	--	1.0	-	-	3740.04	11439.57	13393.46	9976.59	10097.0	6708.24	11054.09	12754.36	12050.43	8964.63	10909.49	10188.47	1564.31	4225.91	7732.23	6209.31	5845.75	6973.59	13370.99	8505.85	15062.92	15170.83	15230.64
MW8822	Pipamperone	C21H30FN3O2	768.4982	375.2322	0.6455	4.7357	1	1893330	--	D02622	--	1.0	-	-	453.0	870.0	404.17	237.4	189.8	199.01	54.84	172.05	364.75	478.39	715.25	2287.6	2340.3	654.66	776.71	998.92	1027.43	141.89	174.01	275.95	4076.33	4106.9	4087.97
MW2296	Pinostilbene	C15H14O3	213.0487	242.0943	0.6068	1.0279	1	42438-89-1	--	C20154	--	1.0	-	-	85665.0	107429.12	80295.06	46817.95	85527.62	83341.13	85936.35	84130.18	48049.18	87634.83	47909.04	48823.21	7943.44	46448.36	61500.38	46047.52	48526.46	62720.73	70803.57	28331.46	86883.63	88943.98	84545.21
MW2295	Pindone	C14H14O3	229.0825	230.0943	0.6753	1.5867	1	83-26-1	--	C19141	72882.0	1.0	-	-	1252.0	941.23	364.83	598.1	614.01	645.95	1472.66	922.97	1203.59	656.36	117887.3	29406.53	154999.53	103721.03	153833.08	103697.38	105316.17	28486.99	23523.82	130390.72	48654.41	46584.4	47297.57
MW2294	Pinazepam	C18H13ClN2O	307.0643	308.0716	0.8957	6.754	1	--	HMDB0041988	D07314	--	1.0	-	-	441953.72	293236.24	917411.31	376216.59	163394.73	254255.67	165850.26	223908.18	472567.34	404035.77	404800.27	413251.78	391783.72	370464.74	335093.97	444532.93	429863.24	757250.12	695363.35	412741.8	421374.92	425449.63	421969.59
MW8819	Pinane Thromboxane A2	C24H40O3	440.3135	376.2977	0.6466	9.9023	1	71111-01-8	--	--	45633.0	1.0	-	-	572481.67	13313.84	20595.84	23138.25	40244.16	16084.46	13020.1	11260.57	156530.47	7813.09	351058.25	220100.68	36841.71	376478.24	293810.3	531147.33	559922.25	131953.66	104885.65	208782.11	157793.26	157274.44	156835.96
MW8818	Pinacidil	C13H19N5	228.1606	245.164	0.6422	4.2275	1	60560-33-0	--	--	1941.0	1.0	-	-	19417.81	14513.7	33733.08	11636.25	30825.63	11138.97	48766.31	12786.87	43186.09	14416.36	15005.83	21336.09	515.86	17764.15	12476.68	16042.46	14534.28	17395.63	13597.43	44188.32	16123.1	15083.71	15981.22
MW8817	Pimonidazole	C11H18N4O3	369.0126	254.1379	0.626	1.5612	1	70132-50-2	--	--	44852.0	1.0	-	-	7322.4	19777.25	33608.21	44448.76	38667.89	50646.03	38248.36	45027.02	57562.58	48147.5	78951.01	52010.89	22748.49	91991.34	101932.97	74633.11	71683.48	44363.52	84849.2	47859.35	27581.21	30397.07	28767.74
MW2292	Pimobendan (Vetmedin)	C19H18N4O2	371.0915	334.143	0.6411	0.7583	1	--	--	D01133	--	1.0	-	-	66187.66	39409.5	65383.98	41410.24	35851.58	46788.49	38190.56	39630.01	59712.2	49744.12	72587.41	73741.46	44314.04	70127.03	75146.07	75201.24	73193.98	110644.26	151890.89	66013.49	65884.03	66621.77	66005.03
MW2291	Pimelea factor P2;Daphnopsis factor R1	C37H50O9	675.2946	638.3455	0.6246	2.4584	1	66107-37-7	--	C09161	--	1.0	-	-	451084.34	205794.13	163496.14	176353.39	164790.66	158091.03	152283.81	148466.5	139635.84	80300.4	30295.85	698492.81	339463.69	20014.51	28025.13	28939.81	27028.18	29251.92	28840.44	406484.74	210462.52	209208.07	209077.54
MW2290	Pilocereine	C45H65N3O6	724.4716	743.4873	0.5598	6.6127	1	2552-47-8	--	C09609	--	1.0	-	-	269103.97	30308.57	13877.99	19420.79	2093.15	152029.71	2088.12	142711.8	25798.86	23672.14	5031.05	22977.35	733.81	9244.5	4920.28	11241.35	8107.29	32559.68	26899.74	19876.17	27193.36	27220.91	26751.0
MW2288	Picolinic acid	C6H5NO2	159.9797	123.032	0.5819	13.8097	1	14639-25-9	HMDB0002243	C10164	44803.0	1.0	-	-	173802.44	226152.76	133623.83	93248.87	95305.14	118259.22	65572.56	178967.19	84923.09	80285.52	100486.78	85295.54	229501.69	135818.31	135135.37	82322.38	59515.77	145213.38	9352.67	81302.15	99653.15	98942.29	94275.31
MW8814	Phytyl phosphate	C20H41O4P	770.5795	376.2742	0.7935	4.9155	1	--	--	C20764	--	1.0	-	-	176161.26	5875.32	116590.1	121096.01	84187.9	130832.48	98137.07	129871.75	197483.32	136794.18	1141.7	2115.55	5834.57	2980.2	2804.05	1798.98	1238.86	29015.62	4584.85	1595.92	6222.11	6247.37	5940.23
MW8813	Phytosphingosine	C18H39NO3	318.3007	317.293	0.5631	6.6807	2-search-DB	--	HMDB0004610	C12144	--	1.0	-	-	919387.31	1223857.78	893624.04	563282.0	980341.54	550298.51	640125.33	500174.23	928465.27	617449.81	456063.44	672250.98	288545.05	415527.31	546930.88	311171.87	355715.59	398675.48	426969.58	538245.66	629022.21	621070.82	618854.09
MW2285	Phytolaccoside B;Esculentoside B	C36H56O11	663.3774	664.3823	0.5434	5.558	1	60820-94-2	HMDB34636	C08968	--	1.0	-	-	26105.05	356.06	2426.96	3175.7	20789.05	77457.97	19441.9	60071.92	18921.05	7447.07	11107.3	135.06	305.78	5125.94	11978.03	5709.63	6503.4	701.63	1142.96	6087.78	17982.75	17912.59	17304.79
MW8808	Physovenine	C14H18N2O3	542.2956	262.1317	0.5562	4.4268	1	6091-05-0	--	C09232	--	1.0	-	-	4690.95	3214.13	2535.28	9821.14	6536.41	4325.29	6404.96	4730.12	2799.03	1391.6	585.39	1279.57	1527.66	351.2	597.55	607.97	277.49	1254.08	475.79	157.98	9540.2	9554.82	9346.81
MW8806	Phthalocyanine;29H,31H-Phthalocyanine;Pigment blue 16	C32H18N8	1067.2976	514.1654	0.5481	4.7398	1	574-93-6	--	C14077	--	1.0	-	-	101164.47	53799.25	73931.03	42080.01	36452.21	29732.37	51898.81	12757.72	158963.72	14163.33	4484.94	3071.89	13934.67	3039.9	2812.22	5243.32	2612.25	1211.54	6204.33	653.38	10709.73	8200.37	5964.3
MW8805	Phthalic acid	C8H6O4	149.0237	166.0266	0.6494	10.7901	2-search-DB	--	HMDB0002107	C01606	--	1.0	-	-	322329.87	357714.67	254222.33	328107.84	317698.83	304408.39	159361.24	307523.73	190216.59	298841.56	272102.46	217771.93	251095.02	158131.23	209511.35	280612.0	254479.82	174968.24	254810.93	252927.33	259945.75	247271.7	252124.22
MW8804	Phoxim	C12H15N2O3PS	635.0725	298.0541	0.5961	3.9415	1	14816183	--	D08373	--	1.0	-	-	612.73	4360.75	167.45	5268.18	177.81	186.62	2600.39	2997.08	5089.31	6145.5	783.02	8878.91	11201.3	9074.78	7494.79	10975.19	22022.52	39154.15	23621.06	9137.71	15083.12	15325.33	15313.22
MW8803	Phosphoserine	C3H8NO6P	207.9986	185.0089	0.6204	0.8243	1	--	HMDB0000272	C01005	--	1.0	-	-	11345.83	6705.68	38786.13	20269.31	11390.99	38785.31	17480.58	33727.31	28550.25	30256.26	24555.09	25605.17	6419.57	29477.11	24327.79	21630.48	32404.8	61462.44	45723.66	6888.05	24783.61	25657.23	24895.24
MW2282	Phosphonic acid;Phosphonate;Phosphorous acid;Phosphite	H3PO3	102.9567	81.982	0.6464	0.7487	1	13598-36-2	--	C06701	--	1.0	-	-	214421.46	37379.75	154973.62	96571.53	55417.89	142891.39	96095.75	175931.49	305328.32	154693.97	260450.63	128806.3	180532.85	255961.78	242873.51	266108.02	226606.12	240405.16	255460.91	113395.57	179869.95	180059.78	176753.14
MW8800	Phosphoglycolic acid	C2H5O6P	120.9688	155.9824	0.6278	13.99	1	--	HMDB0000816	C00988	--	1.0	-	-	183966.68	179049.36	250644.46	121430.62	138948.74	184662.06	170905.88	212208.59	172809.5	117263.41	115481.37	156254.42	194846.4	169801.38	300768.11	216101.01	286974.71	182281.38	132606.86	212436.4	210587.59	225315.55	217016.68
MW2281	Phosphodimethylethanolamine	C4H12NO4P	168.0427	169.0504	0.6183	0.805	1	--	HMDB0060244	C13482	--	1.0	-	-	532556.78	506278.81	441479.65	498372.73	635309.13	469562.49	524038.43	444397.49	507660.54	456167.22	317636.93	408085.03	303086.57	328257.99	321309.11	310736.09	302675.42	277905.79	308375.4	398759.39	385770.78	386111.63	387265.24
MW8799	Phosphocreatine	C4H10N3O5P	234.0254	211.0358	0.6301	0.8444	1	--	HMDB0001511	C02305	--	1.0	-	-	334.54	2100.96	267.04	1565.05	251.63	2144.92	1579.06	2076.93	2705.12	2404.82	18337.72	3211.41	16019.6	17726.44	18427.72	16166.18	19574.08	2929.81	2178.57	2244.77	3321.42	3361.1	3482.87
MW8798	Phosphoadenosine phosphosulfate	C10H15N5O13P2S	583.9077	506.9862	0.531	4.8004	1	--	HMDB0001134	C00053	--	1.0	-	-	597.83	511.08	1075.3	114.45	87.86	474.73	284.07	162.5	1072.86	413.26	131.98	1796.7	20020.71	520.43	356.12	338.14	849.75	2849.24	1612.41	204.15	4223.5	4204.23	4355.63
MW2279	Phosphinate;Phosphinic acid;Hypophosphorous acid;Hyopophosphite	H3PO2	130.9661	65.9871	0.5864	1.0293	1	6303-21-5	HMDB01443	C05339	--	1.0	-	-	13206.95	36953.71	33631.5	12635.1	19818.21	29022.53	41719.36	34555.24	10912.58	45424.72	43035.85	35564.55	53286.87	31860.78	59064.08	34637.84	39381.03	51855.69	48111.26	20285.45	41563.41	39918.11	39163.47
MW8797	Phosphatidylcholine O-34:2	C7H17O2PS3	307.0257	260.0128	0.6466	2.1337	1	--	HMDB0062577	C18690	--	1.0	-	-	329542.31	289236.13	185657.01	223499.71	222304.53	259201.81	236182.48	240728.39	296694.62	252768.14	93593.61	138268.78	7520.45	90314.91	73752.35	154452.32	85515.07	290664.22	245910.3	135706.53	236379.44	233522.2	232658.51
MW2276	Phomopsin A	C36H45ClN6O12	807.28	788.2784	0.549	1.5279	1	64925-80-0	HMDB30447	C19955	--	1.0	-	-	198111.89	71920.81	53779.55	84661.57	114034.29	51546.18	112825.03	50881.72	96533.45	53145.42	18592.83	47504.97	3947.82	7147.56	18839.49	6398.47	20814.45	14979.84	13720.36	60854.71	51674.72	51399.1	50039.15
MW8795	Phoenicoxanthin;Adonirubin	C40H52O3	581.3982	580.3916	0.612	10.8313	1	--	--	C15967	--	1.0	-	-	57206.11	114373.19	81801.42	65415.49	67080.38	102272.3	77463.71	93139.66	8426.73	39318.83	19860.65	17694.96	13355.46	18523.47	17276.86	18466.55	16176.94	21355.7	36760.49	46268.54	66643.9	65045.56	62547.31
MW8792	Phenytoin	C15H12N2O2	366.9641	252.0899	0.5877	3.8536	1	--	HMDB0014397	C07443	--	1.0	-	-	66820.62	154769.3	28078.05	27522.91	81422.87	16282.31	89455.8	22965.53	44378.04	14621.44	2023.56	75515.14	26804.29	3115.94	2198.09	2046.67	3463.36	4279.7	12932.04	1379.54	32487.59	33293.13	32610.88
MW8791	Phenylpyruvic acid	C9H8O3	165.0547	164.0473	0.9039	2.3644	2-MetDNA	--	HMDB0000205	C00166	--	1.0	-	-	510874.11	411972.66	380647.41	417535.66	267236.36	320535.56	255909.85	305823.04	314093.74	186561.9	302826.82	483918.38	277608.04	276976.7	271653.97	147349.81	337353.25	450448.51	381712.89	429123.75	374254.22	374551.65	379703.01
MW8789	Phenylpiperazine	C10H14N2	162.1126	162.1157	0.6502	2.2157	2-search-DB	--	--	--	96615.0	1.0	-	-	10375979.53	11162349.38	2396054.29	2626298.82	2410035.37	1838132.3	2221589.78	1705630.31	11256241.22	1846431.79	19437952.84	3883823.94	1625303.12	9947470.73	3846387.07	5102577.38	11263219.14	5753121.81	2456655.22	4374872.39	6646630.45	5666143.48	6978017.25
MW2273	Phenylacetothiohydroximate	C8H9NOS	186.038	167.0405	0.5438	0.7718	1	--	--	C03719	--	1.0	-	-	34213.91	8637.75	9405.22	8438.23	12776.37	7830.12	9367.82	6330.46	14612.62	11261.35	48579.61	27735.38	41345.99	62646.01	44639.12	46083.67	63749.16	63803.86	47353.24	61693.54	32397.75	31763.89	31501.46
MW8787	Phenylacetaldehyde	C8H8O	104.0576	120.0575	0.7999	2.1311	2-MetDNA	122-78-1	HMDB0006236	C00601	58372.0	1.0	-	-	364089.7	136544.98	32539.75	164346.78	188064.3	48498.12	161867.2	18799.53	187206.0	131087.7	157313.57	552905.46	352983.44	101202.4	188650.82	32613.76	200509.16	264294.5	228570.34	392886.79	233021.26	233623.5	234823.43
MW8786	Phenyl beta-D-glucopyranoside;Phenylglucoside	C12H16O6	530.224	256.0947	0.8563	0.7938	1	1464-44-4	--	C11611	--	1.0	-	-	16133.88	27931.96	35387.05	17356.8	152433.1	16222.31	152261.66	16045.15	63592.19	76500.61	17038.45	29742.07	508.14	16952.19	17096.49	18238.61	14969.15	3142.62	4310.56	35922.09	31528.91	31451.77	31516.36
MW8785	Phenyl acetate	C8H8O2	101.0368	136.0524	0.7102	2.1701	2-MetDNA	--	HMDB0040733	C00548	--	1.0	-	-	15624.21	4663.44	4149.54	12764.54	6950.26	3093.7	4926.65	4615.28	7035.74	2335.78	6459.43	24886.47	13039.46	5967.42	4157.43	4794.15	6919.87	8972.55	6051.38	18958.81	11090.42	11065.99	11201.76
MW8784	Phentolamine	C17H19N3O	282.1607	281.1528	0.6054	4.7499	1	50-60-2	HMDB0014830	D08362	1839.0	1.0	-	-	7047.39	16455.8	5347.69	10461.39	22909.54	12122.61	19795.55	12442.25	3110.8	10907.18	14323.5	13831.02	2314.9	21011.75	14090.02	17893.51	16694.36	2233.84	6336.7	18221.52	13885.81	13815.62	14343.14
MW2272	Phenoxybenzamine hydrochloride	C18H22ClNO.HCl	338.109	339.1157	0.6028	0.9743	1	63-92-3	--	C07436	--	1.0	-	-	2194.87	742.94	1904.64	937.29	656.73	4192.92	753.77	783.02	919.9	997.6	57463.72	11552.52	58259.47	49695.38	67818.86	54347.94	50120.36	15066.14	10528.01	24096.97	20851.86	20806.11	21119.18
MW2270	Phenol	C6H6O	134.0606	94.0419	0.6463	4.8182	2-MetDNA	108-95-2	HMDB0000228	C00146	128.0	1.0	-	-	165182.07	105408.16	129412.87	124795.89	95978.0	306225.15	97061.45	312724.2	175241.59	287547.04	195231.82	424709.3	60254.98	197397.37	193971.05	208965.49	209179.84	171684.15	170593.27	222380.95	216250.78	215487.24	216935.49
MW8781	Phenbenzamine hydrochloride	C17H22N2.HCl	291.1626	290.155	0.6274	2.3877	1	2045-52-5	--	C14410	--	1.0	-	-	247695.94	95577.72	84876.23	185320.97	168399.02	79524.56	122095.09	62469.2	73283.1	61633.15	97003.42	239697.41	139931.68	192093.59	175344.46	187171.73	159385.65	20380.98	221419.87	351761.11	32230.21	26550.59	29773.54
MW8780	Phenazepam	C15H10BrClN2O	713.9671	347.9665	0.6391	8.3605	1	51753-57-2	--	--	64905.0	1.0	-	-	358.09	128.31	50.83	45.84	19.29	20.98	88.01	19.05	21.57	190.47	90.19	352.69	474.87	137.44	56.53	97.65	179.44	296.55	526.21	100.39	1263.23	1201.22	1235.94
MW8779	Phenanthrene-9,10-oxide	C14H10O	177.0702	194.0732	0.6236	13.5996	1	585-08-0	--	C11429	--	1.0	-	-	144165.63	234518.88	166546.08	229112.14	221827.93	233208.59	231586.4	94384.95	237158.28	70507.04	227374.13	205020.54	202743.32	175155.83	209021.56	195893.23	188434.59	66082.45	50961.93	190015.48	186468.49	186246.61	181825.92
MW2268	Phenamil	C12H12ClN7O	304.0715	305.0792	0.6206	8.3568	1	2038359	--	C13752	--	1.0	-	-	10696.19	16005.9	16196.6	19104.43	18358.64	11783.62	16886.37	17612.82	9236.61	18309.49	15460.26	18352.46	10947.33	11958.16	14286.66	13047.0	11301.27	14286.38	14635.44	19780.78	18749.35	18428.43	18129.1
MW8778	Phenacemide	C9H10N2O2	254.9932	178.0742	0.6407	3.3216	1	--	HMDB0015253	C07428	--	1.0	-	-	7398.58	3288.08	607.69	307.29	196.96	1635.23	905.33	445.88	839.83	175.15	31924.76	14162.29	15843.3	30084.07	27825.25	26801.79	36961.13	23807.82	21379.82	4401.15	11713.46	11283.99	11694.87
MW2243	Phe-Thr-OH	C18H19N2O7	359.0954	375.1192	0.9861	3.9125	1	--	--	--	65109.0	1.0	-	-	450111.48	283896.9	596744.42	617198.16	566965.47	521978.85	575972.7	479172.92	470654.83	462867.04	188943.22	116930.83	229764.79	183405.62	214869.7	156850.42	161515.64	102522.6	121056.89	69552.85	320425.61	318669.98	319443.58
MW8777	Phe Val Val	C19H29N3O4	363.2151	363.2158	0.635	0.77	1	--	--	--	19435.0	1.0	-	-	27455.55	28745.25	21989.09	24971.98	18815.64	23053.77	20076.54	20832.42	23938.74	13840.5	34555.71	62196.12	10549.38	33181.54	35582.11	44410.49	34149.89	23520.71	19841.11	71065.62	38397.39	38405.06	38052.96
MW2267	Phe Val Trp	C25H30N4O4	449.2211	450.2267	0.5365	7.6014	1	--	--	--	17317.0	1.0	-	-	255111.12	2117.16	67257.81	94287.77	11782.14	153905.34	22386.68	99622.62	101303.69	2199.24	50706.75	2429.6	192687.12	47821.08	41213.09	47085.22	47569.41	80032.56	389.67	269.42	130509.98	129367.42	130268.65
MW8776	Phe Val Met	C19H29N3O4S1	442.2005	395.1879	0.6364	0.7833	1	--	--	--	16037.0	1.0	-	-	190464.12	112805.43	124988.68	116866.24	85453.96	79860.68	78511.72	77724.81	146228.31	62878.96	61093.44	84127.92	43760.16	62509.59	61875.0	65725.02	62416.91	55302.26	50551.09	91337.78	96487.37	97087.24	96450.68
MW8775	Phe Tyr Val Lys	C29H41N5O6	520.2915	555.3057	0.6295	2.4611	1	--	--	--	143427.0	1.0	-	-	1229.75	696.33	8538.86	248.84	472.19	231.8	11573.28	130.39	13555.51	540.45	78676.02	74556.07	300685.96	67538.07	81549.35	87522.23	62688.44	46223.88	36691.23	47207.39	46796.34	48148.65	46932.85
MW8774	Phe Tyr Ser Lys	C27H37N5O7	658.1452	543.2693	0.6067	1.6767	1	--	--	--	143387.0	1.0	-	-	11729.74	11450.05	20850.32	22904.0	10895.21	25962.14	1693.43	24113.97	706.54	25968.46	5545.33	3761.87	727.03	5406.27	5432.25	5706.76	5209.4	7102.31	7272.6	5664.48	3042.02	2372.82	3311.79
MW8773	Phe Tyr Leu Glu	C29H38N4O8	637.2214	570.269	0.6078	4.8126	1	--	--	--	143262.0	1.0	-	-	107266.14	80134.51	160975.81	179381.46	102268.81	162772.37	118141.0	125597.59	91415.59	187858.75	1582.76	9406.47	9147.32	2948.47	1845.22	874.61	1454.29	3214.59	2094.7	2861.28	10910.24	10783.92	9990.06
MW8772	Phe Thr Pro Thr Glu	C27H39N5O10	660.2237	593.2697	0.6173	12.5776	1	--	--	--	264076.0	1.0	-	-	2.93	2.32	0.26	0.77	0.34	0.26	0.39	0.55	0.38	27.77	0.27	134.94	176.08	35.94	62.11	38.69	0.27	0.34	0.33	0.34	311.82	319.53	285.36
MW2266	Phe Thr Lys Lys	C25H42N6O6	503.2971	522.3166	0.5535	9.3359	1	--	--	--	142047.0	1.0	-	-	377393.75	2917.28	10664.42	26859.23	1084.19	9089.94	2209.84	14234.92	64611.56	1691.57	15008.38	17437.9	26288.55	12642.7	10640.95	17155.58	18379.02	53435.84	26083.83	24147.23	36002.96	36166.33	35124.98
MW8770	Phe Thr Arg Lys	C25H42N8O6	550.3231	550.3227	0.5988	4.9381	1	--	--	--	142167.0	1.0	-	-	605.88	1622.05	481.51	3555.15	1201.54	199.38	232.08	3724.96	2536.04	727.99	23318.94	2688.87	235897.19	19846.86	26027.47	16101.37	13534.71	213.17	289.56	788.74	6661.73	7111.71	7075.49
MW2264	Phe Ser Lys Glu	C23H35N5O8	508.2408	509.2486	0.6221	4.7762	1	--	--	--	141642.0	1.0	-	-	942.36	2192.04	429.64	1486.6	1300.81	1348.8	1623.86	1464.18	762.71	1039.49	574.61	893.37	9738.88	722.81	737.9	928.5	421.36	1254.48	861.34	555.72	3606.03	3326.15	3666.04
MW8768	Phe Ser Lys	C18H28N4O5	380.2053	380.206	0.6354	4.6352	1	--	--	--	22881.0	1.0	-	-	828.75	715.36	456.73	571.74	496.72	665.75	656.43	445.6	746.99	414.89	19130.66	3548.85	1326.61	18533.06	17276.78	22664.27	20508.38	11057.99	10196.05	2169.64	9619.84	9609.17	9493.67
MW8766	Phe Pro Glu	C19H25N3O6	438.1874	391.1743	0.629	2.7075	1	--	--	--	16015.0	1.0	-	-	35846.22	18201.83	33264.46	24637.44	5186.2	23683.88	6631.6	19666.23	21523.42	20208.86	16343.11	25558.95	16383.63	20638.18	18565.61	21380.43	25061.22	31051.52	29252.15	22109.97	22471.93	22668.51	22317.12
MW2262	Phe Pro Cys	C17H23N3O4S1	402.0909	365.1409	0.5464	6.505	1	--	--	--	21471.0	1.0	-	-	24288.79	32226.99	31653.44	30030.87	32058.9	31302.32	34498.67	30611.83	33280.74	32745.72	28658.53	36910.63	26942.18	31677.37	32180.95	31337.83	31656.35	28137.98	37429.36	30659.11	32651.34	32033.96	31984.71
MW8764	Phe Phe Lys	C24H32N4O4	463.2313	440.2424	0.627	0.8975	1	--	--	--	23440.0	1.0	-	-	142860.71	162111.23	61835.67	69956.97	111111.02	45724.41	106520.47	46244.17	52086.77	32451.91	21766.92	58077.38	13593.49	23470.46	24423.38	21675.19	23091.13	15297.97	15428.44	56168.76	48639.9	48732.78	48474.16
MW8763	Phe Lys Glu Ala Phe	C32H44N6O8	704.3384	640.3221	0.6276	3.9976	1	--	--	--	264813.0	1.0	-	-	1085.89	290.4	2002.49	3189.58	4610.02	213.98	907.35	876.01	2844.75	833.71	53468.71	24144.04	2128.86	57034.12	50992.59	48498.37	56956.6	54484.5	42896.55	33914.7	21541.94	22004.63	22294.01
MW2260	Phe Lys Gln Lys	C26H43N7O6	568.3248	549.3275	0.5642	7.0742	1	--	--	--	138947.0	1.0	-	-	481.94	3906.79	3166.71	2236.42	721.99	2869.22	1650.81	1767.82	3426.05	1976.89	13058.82	8826.95	4492.37	15106.74	14442.14	16849.1	16371.68	6732.32	8863.73	23336.83	4584.91	5757.76	6349.12
MW8762	Phe Lys Asp Lys	C25H40N6O7	501.2827	536.2958	0.6055	4.6183	1	--	--	--	138727.0	1.0	-	-	365511.51	58026.52	55151.75	30409.24	112486.32	21582.09	110705.52	15104.6	364198.08	35508.18	2886.83	2889.74	24202.48	2617.37	2569.65	2948.82	1502.11	1440.07	10688.17	3059.57	4961.43	5332.41	5408.7
MW8759	Phe Ile Phe Met Gly	C31H43N5O6S	728.1684	613.2934	0.6487	3.9652	1	--	--	--	264228.0	1.0	-	-	4055.32	714.45	504.29	320.49	360.11	245.34	320.9	200.83	2782.58	561.87	18573.17	4551.16	95105.97	15701.57	18461.52	15979.13	18671.49	20596.24	21863.96	2886.35	5005.26	5122.18	4677.37
MW2257	Phe His	C15H18N4O3	321.1371	302.1379	0.6255	6.7832	1	--	--	--	23660.0	1.0	-	-	348847.6	61148.82	38369.76	86845.04	118385.24	120328.77	133286.07	112238.85	143066.58	157868.58	190290.91	6765.17	98454.81	78891.25	79245.34	73068.05	85792.61	100491.99	92450.36	1882.94	82810.04	78622.72	77181.57
MW8756	Phe Gly Phe Gly	C22H26N4O5	143.0731	426.1903	0.7316	4.1388	1	59005-83-3	--	--	65366.0	1.0	-	-	153616.24	59270.03	46829.74	63922.85	15480.13	31559.29	24122.8	25208.8	50133.07	15468.01	133399.43	152136.92	111667.46	112404.06	104015.54	119935.06	141310.79	125918.68	120353.64	144065.61	98648.14	98559.78	97890.87
MW2256	Phe Gly Gly	C13H17N3O4	316.0709	279.1219	0.6185	3.7314	1	23576-42-3	--	--	19109.0	1.0	-	-	124.41	111.22	106.54	64.18	647.08	1545.6	118.02	101.92	202.6	47.49	345.01	549.58	2704.47	733.05	836.04	1008.27	1236.23	13533.03	10253.73	248.83	2916.42	3148.11	3149.33
MW2255	Phe Glu Lys Ala Ala	C26H40N6O8	563.2828	564.2908	0.6118	4.2872	1	--	--	--	264674.0	1.0	-	-	1113.92	424.53	3092.64	1228.58	112.21	205.39	85.97	321.88	3079.99	93.86	19099.5	2589.04	531.93	14952.55	15771.66	16237.34	17679.02	10752.22	8619.97	988.83	7075.5	7182.73	6993.71
MW8754	Phe Glu His Phe Leu	C35H45N7O8	758.2858	691.333	0.6286	0.8989	1	--	--	--	264821.0	1.0	-	-	54970.82	89326.2	23593.97	34420.4	47022.44	15746.55	46704.08	15541.63	9558.2	9299.56	9977.55	8191.64	12924.92	9233.62	10022.96	9073.7	9296.96	9950.99	11175.0	5242.02	4143.93	4533.65	4645.06
MW2254	Phe Glu Glu	C19H25N3O8	404.1457	423.1642	0.6086	4.9216	1	--	--	--	18708.0	1.0	-	-	2212.15	1253.4	621.94	296.14	1952.8	1977.87	1491.59	1141.15	11172.18	828.69	70717.28	18387.19	31396.42	33949.02	37919.01	38491.03	36419.71	42684.07	44892.29	36078.76	22378.05	22975.73	22973.76
MW8753	Phe Gln Phe Phe Lys	C38H49N7O7	230.123	715.3693	0.5429	4.0966	1	--	--	--	264252.0	1.0	-	-	73840.31	72107.84	73043.56	71580.01	69909.85	66345.41	69662.0	69296.91	85453.34	75569.56	147341.16	70539.99	134331.2	154519.48	136810.04	196416.82	167271.06	11828.07	3584.71	124210.39	55252.3	56107.97	56157.09
MW2253	Phe Gln Lys Lys Gly	C28H46N8O7	625.3464	606.3489	0.5797	10.6418	1	--	--	--	264640.0	1.0	-	-	252854.5	291573.07	453138.49	510074.99	323077.04	693849.67	234435.61	541810.12	13571.52	315179.42	96670.91	127066.15	110062.08	98730.25	64009.17	71098.06	78854.26	64085.31	103607.19	149643.45	307263.39	310243.55	284850.9
MW2252	Phe Gln Asp Arg	C24H36N8O8	601.213	564.2656	0.5863	0.9416	1	--	--	--	140733.0	1.0	-	-	39272.88	6627.42	3055.64	7683.49	8917.31	7880.39	7551.87	5775.01	7851.4	6813.34	927.29	18727.82	13483.52	2798.37	2276.3	4245.0	3482.7	2174.1	5690.66	28506.98	11700.44	11869.69	11709.17
MW2251	Phe Gln Arg	C20H31N7O5	430.2186	449.2387	0.5042	8.2837	1	--	--	--	15866.0	1.0	-	-	761.34	9045.92	3945.11	13094.32	8401.2	14181.28	5801.82	8864.25	7820.41	10509.84	22680.28	27167.76	39838.4	23924.5	29201.57	18097.8	22435.11	3359.06	3894.79	21160.26	14825.67	15100.82	14963.6
MW2250	Phe Gln Ala Arg	C23H36N8O6	519.2704	520.2758	0.5409	4.7098	1	--	--	--	140693.0	1.0	-	-	53012.3	150.65	1965.11	12082.11	37856.58	50191.86	42607.23	53130.71	76674.26	31019.93	20528.17	11209.37	655.11	18962.87	18699.99	16279.84	15256.33	13452.31	12709.46	407.43	31401.39	31417.13	31772.56
MW8752	Phe Cys Tyr	C21H25N3O5S1	414.1483	431.1515	0.6432	0.7935	1	--	--	--	15973.0	1.0	-	-	131870.35	176479.89	187652.11	151390.51	391202.45	122928.35	387471.89	126968.92	232378.82	284905.13	74719.4	127918.46	18876.11	77832.81	85397.85	75953.97	75437.8	46152.48	51899.87	160839.46	151502.66	151522.97	150531.46
MW8751	Phe Asp Phe Gln Asn	C31H39N7O10	784.1525	669.2758	0.5839	1.0517	1	--	--	--	264461.0	1.0	-	-	44738.42	86312.06	34066.06	166533.96	189824.31	27331.72	192835.86	27440.32	60885.86	43038.14	2624.87	32128.19	2752.9	4843.89	5667.23	5353.37	8451.59	3324.08	1632.74	54910.88	29797.49	30539.86	29719.02
MW8750	Phe Asp Asp	C17H21N3O8	472.0507	395.1329	0.5712	0.7174	1	--	--	--	20265.0	1.0	-	-	18623.56	11127.14	12600.3	10973.66	10859.34	6958.86	12771.16	22744.61	14674.87	9075.17	12012.18	50571.42	19187.65	13029.36	10236.2	11732.48	12623.19	7076.27	6990.13	26956.82	14558.5	14340.1	14326.31
MW2248	Phe Asp Ala Glu	C21H28N4O9	499.1856	480.1856	0.5814	6.9699	1	--	--	--	136283.0	1.0	-	-	637718.93	44200.43	178180.45	224235.45	171905.55	693505.3	177710.71	642034.22	406783.84	256135.0	123464.36	17235.12	44633.31	84137.55	120064.02	135064.89	121756.97	135153.88	123163.8	1238.67	261969.36	254382.64	252664.02
MW2247	Phe Arg Phe	C24H32N6O4	484.2677	468.2485	0.644	6.8952	1	--	--	--	21560.0	1.0	-	-	93792.6	146718.7	161232.27	135997.96	81819.89	110552.2	81643.21	83844.32	110484.03	108591.07	218534.37	172054.07	258528.98	215243.18	231980.19	205313.68	224988.47	143991.4	166814.27	192631.5	174603.26	176970.19	176896.01
MW8749	Phe Ala Thr Asp Asp	C24H33N5O11	682.0954	567.2177	0.5312	4.0357	1	--	--	--	264633.0	1.0	-	-	2728.66	3549.67	1245.58	937.57	2380.77	958.47	1620.88	1026.82	2642.79	485.81	1034.17	8518.18	683.86	864.09	1590.37	2443.63	806.8	1858.36	2751.13	977.54	6829.2	6584.28	6808.33
MW2246	Phe Ala Ser	C15H21N3O5	360.0982	323.1481	0.5423	3.9129	1	--	--	--	17315.0	1.0	-	-	65904.05	37349.64	85830.48	94523.91	80776.94	77706.11	86604.78	67877.38	69817.38	66239.08	29845.87	25618.43	35746.3	33066.01	28332.55	23725.28	17622.4	12002.75	9788.53	16103.41	54439.46	54477.54	53667.12
MW8748	Phe Ala Lys	C18H28N4O4	751.4135	364.2111	0.5666	4.8423	1	107889-42-9	--	--	22944.0	1.0	-	-	622334.73	254149.93	1038747.75	436286.57	552660.8	474206.12	671993.36	459562.2	825446.17	676583.58	3957.78	62294.31	3579.34	4111.11	739.5	6424.49	36385.09	75440.99	20749.26	73235.0	148379.47	145536.24	144460.82
MW8747	Phe Ala Arg Gln Lys	C29H48N10O7	1014.532	648.3707	0.5834	4.2767	1	--	--	--	264600.0	1.0	-	-	3459.39	1517.9	1166.29	3083.97	289.73	811.69	2441.84	2828.18	6687.93	265.13	30293.06	34063.93	25632.9	18949.22	27661.67	24572.59	21159.4	23108.79	10833.54	29198.86	16687.95	17497.76	17623.84
MW2242	Phaseolotoxin;N5-[Amino(sulfoamino)phosphinyl]-L-ornithyl-L-alanyl-N6-(aminoiminomethyl)-L-lysine	C15H34N9O8PS	530.1913	531.1989	0.633	8.158	1	62249-77-8	--	C08440	--	1.0	-	-	6958.82	281.15	2323.97	4993.83	595.88	8086.5	795.7	7078.35	6783.45	803.43	1912.43	208.1	4566.7	1469.2	1759.77	1551.99	1118.04	2043.31	560.62	72.55	4809.86	4615.7	4530.55
MW2241	Phaseollidin hydrate	C20H22O5	363.1199	342.1467	0.5366	4.6601	1	--	HMDB37922	C05229	--	1.0	-	-	6709.88	6801.1	13078.07	7202.13	7200.06	6734.57	6037.47	3872.07	4206.8	7614.44	9509.91	20826.31	10225.18	11940.39	14311.75	15719.2	19209.83	21190.9	17716.46	18458.73	11129.75	11137.87	11023.87
MW2240	Phaseolic acid	C13H12O8	277.0353	296.0532	0.6492	0.9878	1	53755-04-7	HMDB29318	C10483	--	1.0	-	-	90199.2	110766.13	171091.97	95770.87	75650.74	171532.1	95154.74	186514.72	12510.61	84821.84	20200.22	4139.74	160202.4	12219.38	16255.09	12840.85	25233.27	22188.32	27955.73	13960.22	85985.3	90350.82	90980.58
MW8745	Phantomolin	C21H26O6	339.1588	374.1729	0.6367	10.7566	1	55306-08-6	--	C09527	--	1.0	-	-	17905.72	8705.79	10909.2	12773.29	5867.3	16206.32	9382.07	13751.93	14819.31	14783.76	20903.32	21405.54	28334.89	26513.36	21041.57	24964.03	20269.81	14080.89	6866.97	20456.3	20314.46	21210.54	20100.2
MW8744	Phaeantharine	C39H40N2O6	671.2508	632.2886	0.6034	0.7877	1	27670-80-0	--	C09608	--	1.0	-	-	66971.87	124009.96	57141.79	69277.49	249454.27	40076.6	248285.09	37908.53	81294.33	76178.8	9512.43	42673.68	5061.55	7252.8	6712.45	8080.81	5529.01	2894.15	1894.18	48995.94	40668.98	41203.89	41228.36
MW8743	Phaclofen	C9H13ClNO3P	537.0273	249.0322	0.6385	1.2946	1	114012-12-3	--	--	374.0	1.0	-	-	4465.69	23156.93	8829.55	2837.0	24596.03	26747.97	26532.07	27476.09	16613.0	25187.64	8621.83	10512.93	1062.18	6162.51	5180.98	6264.81	4952.92	6033.28	9365.61	2016.6	8748.5	8167.94	8828.12
MW2224	Petunidin 3-(6''-p-coumarylglucoside)	C31H28O14	661.0952	624.1479	0.5876	11.6809	1	--	--	--	47125.0	1.0	-	-	50.23	537.6	26.33	22.76	582.68	19.88	686.68	19.51	20.77	56.48	24.76	728.14	26.23	32.23	18.61	590.69	647.2	992.83	1080.24	834.86	3325.57	3208.94	3024.96
MW8716	Petunidin 3-(6''-acetylglucoside)	C24H24O13	1041.2511	520.1217	0.6371	1.4358	1	--	--	--	47123.0	1.0	-	-	2167.59	3330.82	6377.59	5874.29	6654.91	3723.2	3095.49	2548.37	7700.84	6131.24	2806.68	6447.56	3726.37	1373.08	2818.1	2878.72	2668.24	559.7	1106.2	7208.76	6183.7	6127.54	5983.38
MW8715	Petromyzonol 24-sulfate;5alpha-Cholan-3alpha,7alpha,12alpha-triol 24-sulfate	C24H42O7S	551.1844	474.2651	0.6387	1.8845	1	--	--	C16259	--	1.0	-	-	9038.28	1776.29	9782.69	5909.97	16958.33	19215.82	17047.97	15212.54	13566.17	16321.92	268.04	2416.44	3586.27	162.27	1676.52	274.71	295.25	1350.29	1952.76	2584.25	4179.22	4071.57	3268.3
MW8714	Petromyzonol	C24H42O4	412.3426	394.3083	0.6214	11.9532	1	28979-29-5	--	C16258	42884.0	1.0	-	-	16439.28	9021.67	17034.93	16455.98	13534.99	13964.07	11794.45	14189.9	13744.14	7886.88	7959.07	5016.31	7111.94	8109.29	8658.51	7056.91	7237.36	7570.74	8549.45	6129.34	17829.18	16893.46	15600.77
MW8713	Petasitenine	C19H27NO7	458.0981	381.1788	0.6302	1.4358	1	--	HMDB0030328	C10359	--	1.0	-	-	13758.6	103820.82	27717.13	25355.86	63429.75	38906.16	63058.78	43881.36	18073.88	28768.21	9303.32	15390.78	1209.71	4993.71	12918.69	5823.8	7287.18	2235.01	2749.05	9476.78	15203.69	16228.15	16064.92
MW2221	Perphenazine maleate	C21H26ClN3OS.(C4H4O4)2	616.1504	635.1704	0.5463	1.5694	1	5352-90-9	--	C13540	--	1.0	-	-	144585.13	207078.83	40221.85	220054.82	211273.49	119138.53	214835.25	137812.83	494296.78	159726.06	77296.01	90635.49	125092.17	64734.27	77178.53	93531.05	59138.24	135745.27	140238.25	123774.24	168480.87	163061.08	162175.16
MW2220	Perphenazine	C21H26ClN3OS	424.1232	403.1485	0.6473	1.5438	1	--	HMDB0014988	C07427	--	1.0	-	-	146461.19	153994.47	66098.13	159414.71	145695.85	87974.8	248309.4	87180.17	335864.21	91221.79	40437.75	128659.47	92581.48	50173.47	53955.69	53168.56	60326.47	124829.31	82818.53	149183.11	113184.84	111150.67	109195.26
MW2219	Perlolyrine	C16H12N2O2	131.0349	264.0899	0.698	3.9958	1	--	HMDB0030327	C09231	--	1.0	-	-	43357.53	9999.0	43862.7	45997.27	58210.0	41795.88	62223.91	54375.79	38158.21	45165.28	64012.92	20110.06	14803.89	51823.18	60021.77	99229.43	100571.74	345678.02	292160.43	28602.5	112993.86	113635.31	112838.92
MW8712	Perindoprilate	C17H28N2O5	358.2336	340.1998	0.8872	1.4783	1	95153314	HMDB0060574	C21517	--	1.0	-	-	61467.38	41403.02	51766.06	32325.7	138298.51	33237.77	115012.53	36577.75	95347.18	62936.45	72810.57	59331.42	31914.44	65826.69	67804.33	63373.95	108686.87	26279.83	23921.86	72704.11	75214.1	75831.58	71069.96
MW2218	Perillyl-CoA	C31H48N7O17P3S	858.1281	915.204	0.573	1.4651	1	--	--	C11929	--	1.0	-	-	12851.22	4147.03	11482.74	9211.02	3175.11	11774.48	2162.74	4467.46	17617.16	3688.75	12817.22	13944.56	829.52	21603.82	13821.67	22737.36	25472.11	113746.6	68829.8	6495.84	15867.65	17397.14	17466.73
MW8710	Perfluorooctanesulfonic acid	C8HF17O3S	464.9248	499.9375	0.572	4.5019	1	--	HMDB0059586	C18142	--	1.0	-	-	14631.88	14133.22	11072.48	6862.95	184.21	123.28	15249.74	24012.11	306.26	21394.2	31554.97	31439.02	525920.33	33129.54	44767.14	44347.85	29819.68	1288.19	8612.71	7341.36	57584.72	56906.27	56588.14
MW8709	Perchloroethylene	C2Cl4	350.7385	163.8754	0.5299	4.6852	1	--	HMDB0041980	C06789	--	1.0	-	-	3644.67	841.11	2069.11	2012.13	928.14	82.07	2332.94	802.47	3768.29	123.32	342.65	1349.61	36840.81	121.66	729.1	593.54	1573.72	5791.23	4327.88	4913.61	8108.35	8017.74	8111.8
MW2215	Peracetic acid	C2H4O3	75.0088	76.016	0.6448	0.8995	1	--	HMDB0031608	D03467	--	1.0	-	-	27840.51	37209.3	65882.01	69243.93	34440.65	62116.91	50854.73	57954.0	33056.22	56157.98	50654.79	39786.9	51006.34	39064.7	50212.06	38616.04	32237.55	53640.94	50286.86	23237.1	45539.79	45618.39	44521.41
MW2214	Peonidin-3-(p-coumaroyl)-rutinoside-5-glucoside	C43H49O22	898.2554	917.2715	0.5875	1.3201	1	--	--	C16293	--	1.0	-	-	180286.23	422743.14	244598.28	328207.12	345920.67	254700.77	363031.18	247892.85	235838.25	259768.16	123777.69	247287.59	99752.73	132825.3	130954.38	120722.38	109145.79	111824.45	100114.07	210682.47	202636.88	202989.5	206181.23
MW8707	Peonidin 3-(6''-p-coumarylglucoside)	C31H28O13	723.0253	608.153	0.5399	4.0664	1	--	--	--	47011.0	1.0	-	-	39031.39	15199.2	23172.03	10132.58	5501.27	4814.66	6332.8	3209.88	7126.16	17254.84	48749.23	51057.57	1810.96	49994.19	45116.99	27880.99	42069.81	35408.56	35714.18	56877.82	30824.14	30882.56	29733.93
MW8706	Pentylone	C13H17NO3	312.0296	235.1208	0.5022	1.463	2-search-DB	--	--	--	85215.0	1.0	-	-	89045.69	296968.35	250718.69	372510.83	384831.22	301682.27	414021.41	329415.36	245876.18	360714.73	158269.75	150541.16	175804.37	151940.3	195351.74	216741.31	135801.56	102730.44	138492.89	110232.19	135440.48	144446.42	141925.18
MW2213	Pentoxifylline alcohol	C13H20N4O3	299.1524	280.1535	0.6495	13.244	1	6493-06-7	--	--	1768.0	1.0	-	-	46651.6	19965.76	10583.28	13265.2	16038.28	21028.75	12704.86	13209.51	17297.94	29874.47	48371.23	40460.25	58569.51	46812.51	61245.16	46822.7	40587.69	50169.87	45609.28	68449.24	34282.98	35482.76	37928.61
MW8705	Pentostatin	C11H16N4O4	286.1512	268.1172	0.6345	1.6768	1	--	HMDB0014692	C02267	--	1.0	-	-	1370.22	656.9	8594.2	4103.48	1888.52	3220.79	332.12	2263.57	5940.51	985.24	55853.71	8057.87	62898.17	52315.29	48050.14	81384.44	62050.81	30853.09	39702.79	17717.09	31640.77	29599.73	28422.97
MW8704	Pentobarbital sodium	C11H17N2O3.Na	248.1131	248.1137	0.641	0.8619	1	57-33-0	--	C07423	--	1.0	-	-	15442.36	26045.21	47911.18	29330.83	35895.09	21675.08	39472.03	20798.77	55192.32	28917.3	22529.04	20764.7	13650.27	10508.86	14231.83	15837.38	15172.16	14516.78	10771.12	18037.6	22711.93	22795.38	22452.07
MW2212	Pentanoyl-CoA;Valeryl-coenzyme A	C26H44N7O17P3S	832.1514	851.1727	0.5314	2.1192	1	4752-33-4	HMDB13037	C00888	--	1.0	-	-	23064.64	20213.31	28489.11	25785.92	21637.8	22948.95	26841.18	21236.55	32657.2	22714.28	41599.35	19190.53	4069.91	38813.4	31371.22	38093.73	45078.62	44672.75	32945.64	13847.35	30166.23	30273.36	29180.57
MW8703	Pentamidine	C19H24N4O2	455.0648	340.1899	0.6414	4.0118	1	--	HMDB0014876	C07420	--	1.0	-	-	1965.47	10545.26	1113.29	819.4	4747.69	366.0	5380.63	729.82	3857.89	1875.36	659.85	11683.42	5731.55	375.97	565.02	569.48	586.73	1573.86	2142.83	1016.83	7272.99	7134.92	7233.51
MW8699	Pentachloroethane;1,1,1,2,2-Pentachloro-ethane	C2HCl5	241.8843	199.8521	0.5324	13.558	1	76-01-7	--	C19496	--	1.0	-	-	354084.04	314869.62	236321.61	218674.7	296320.57	306388.63	213375.04	249426.6	176825.61	225943.61	297006.93	229567.85	271503.71	337941.26	246803.44	320036.37	145656.82	287577.53	323519.1	253522.23	298984.74	297279.97	299026.28
MW2209	Pentacarboxylporphyrin I	C37H38N4O10	245.043	246.0528	0.6816	0.841	1	--	HMDB0000789	--	--	1.0	-	-	111538.94	138912.48	79803.92	320023.95	141920.09	102174.56	138969.38	110303.16	219558.55	72229.96	24769.48	121738.15	85182.45	31584.72	69552.16	15615.82	32510.23	21047.93	30815.78	53017.46	123085.16	121164.91	109800.33
MW2208	Penitrem F	C37H44ClNO5	654.2398	617.2908	0.6311	4.2182	1	78213-65-7	--	C20598	--	1.0	-	-	33534.09	64699.94	23635.15	27776.19	38297.22	25094.02	35234.98	24714.8	21481.63	19713.82	25883.94	5051.33	1097.34	23879.97	23923.82	30319.02	32730.19	28233.36	27599.18	3007.92	25536.76	25760.23	25557.93
MW2207	Penitrem E	C37H45NO6	580.3065	599.3247	0.6316	9.5456	1	78213-66-8	--	C20597	--	1.0	-	-	5453.12	4255.04	2028.01	2525.61	2927.91	5765.86	2190.76	3065.15	888.24	3733.8	1747.33	1493.88	1590.97	882.82	873.83	998.65	1170.54	728.98	227.76	2278.57	5315.67	5056.11	4976.45
MW2206	Penitrem D	C37H45NO4	552.3092	567.3349	0.8872	8.9141	1	78213-64-6	--	C20596	--	1.0	-	-	344196.73	218939.25	141148.36	171611.24	154355.88	264158.34	182234.13	195937.09	83182.21	186633.78	154601.42	208700.03	199915.7	153957.33	121870.58	167311.16	186123.58	119147.12	97555.19	208237.66	275886.62	274476.75	274500.74
[truncated: 3,306 more rows]
