# Supplementary material for: The characteristics of proteome and metabolome associated with contrasting sperm motility in goat seminal plasma
Source: Sci Rep. 2021 Jul 30;11:15562. doi: 10.1038/s41598-021-95138-9 (PMC8324791; doi:10.1038/s41598-021-95138-9)
Supplement: Supplementary file 8 — Supplementary Information 8. [file 41598_2021_95138_MOESM8_ESM.xlsx]

## Sheet: Sheet1
Index	Compounds	Formula	Precursor(g/mol)	Mass(g/mol)	score	RT(min)	MS_level	CAS_ID	HMDB_ID	cpd_ID	Metlin_ID	Pubchem.CID	Class.I	Class.II	B1	B2	B3	B4	B5	B6	B7	B8	B9	B10	G1	G2	G3	G4	G5	G6	G7	G8	G9	G10	VIP	p_value	Fold_Change	Log2FC	Type
MW1643	Inosine	C10H12N4O5	536.1564	268.0808	0.9988	2.3335	2-MetDNA	--	HMDB0000195	C00294	--	1	-	-	19269.18	36626.19	292.09	15415.6	17899.66	20022.63	20071.8	26841.01	23917.88	17681.37	93949.25	27493.69	52250.89	52076.69	129903.49	28992.61	144862.99	21870.02	82641.25	31600.08	1.1084773890719781	0.00879222649054671	3.3611879694851594	1.7489712254966114	up
MW7300	DL-2-Aminooctanoic acid	C8H17NO2	160.1331	159.1259	0.9956	0.8601	1	664-90-6	HMDB0000991	--	5923.0	1	-	-	2367144.4	1630066.55	8514748.23	2145368.7	2188177.03	2177609.44	2271313.57	1958530.77	1292726.79	1581268.25	2513066.87	5484221.05	7916219.09	13833990.26	8018284.02	9693870.22	8416972.56	6575912.33	11954070.89	13032429.49	1.3031595025853948	0.0002783028908588073	3.3466984970237474	1.7427385849528785	up
MW2472	Riboflavin	C17H20N4O6	752.2719	376.1383	0.9948	4.6851	2-MetDNA	--	HMDB0000244	C00255	--	1	-	-	19018.83	5542.91	1899.35	17515.51	18370.11	22228.96	19987.56	23325.94	21887.93	4154.48	16959.97	11291.43	43524.75	22097.11	28736.03	51667.41	27315.25	44517.44	52467.22	25256.05	1.1180534242811608	0.006289963561064522	2.103744143989167	1.0729592556552616	up
MW17	(13E)-11a-Hydroxy-9,15-dioxoprost-13-enoic acid	C20H32O5	335.2129	352.225	0.9940000000000001	5.4745	2-MetDNA	--	HMDB0001320	C04654	--	1	-	-	16854.16	2404.23	2435.35	11708.11	17058.35	14707.62	12166.08	5952.34	8403.92	226.31	39819.53	2467.43	6637.17	13950.38	24948.46	81047.99	26713.78	56784.89	33843.08	32447.91	1.0611821838775601	0.01441763155897071	3.466850065064509	1.793625443963493	up
MW2243	Phe-Thr-OH	C18H19N2O7	359.0954	375.1192	0.9861	3.9125	1	--	--	--	65109.0	1	-	-	188943.22	116930.83	229764.79	183405.62	214869.7	156850.42	161515.64	102522.6	121056.89	69552.85	450111.48	283896.9	596744.42	617198.16	566965.47	521978.85	575972.7	479172.92	470654.83	462867.04	1.644344239495103	1.2015560845152819e-07	3.2519230787149818	1.7012931321764957	up
MW2623	Tartronate semialdehyde	C3H4O4	103.0033	104.01100000000001	0.9827	0.9194	2-MetDNA	--	HMDB0006938	C01146	--	1	-	-	8223.89	4976.57	8954.58	5766.45	6849.96	4684.21	3512.69	5478.39	5216.39	3021.76	10979.55	6231.06	10348.16	13492.03	8553.27	22317.15	10148.46	20924.72	8886.17	26434.97	1.1592351383814772	0.004425516255576301	2.440077770284109	1.286927130171437	up
MW6298	Adenosine	C10H13N5O4	251.0969	267.0968	0.9825	2.0497	2-MetDNA	58-61-7	HMDB0000050	C00212	86.0	1	-	-	2391.92	486.64	374.55	1599.58	2813.05	2237.43	1640.33	4112.14	8236.51	660.22	93145.06	37966.21	50215.55	22376.5	36870.83	44193.41	35366.39	36050.32	68782.03	57934.17	1.5263488604764102	5.343676751878167e-05	19.668181523820305	4.2977916703053065	up
MW5787	2-Ethoxyethanol	C4H10O2	133.1051	90.0681	0.9778	1.3361	2-MetDNA	--	HMDB0031213	C14687	--	1	-	-	1699120.77	2804170.58	3773309.97	1642101.55	1419816.65	1413535.23	1587879.61	1372271.91	1325370.27	1653839.95	594850.4	835438.51	615416.37	1204464.59	1091440.09	1042978.34	1124291.51	839350.6	799639.13	651437.48	1.195929029975094	0.003253144715084545	0.4707672650014338	-1.0869140894260825	down
MW7953	L-Proline	C5H9NO2	160.0349	115.0633	0.9765	0.8195	2-MetDNA	147-85-3	HMDB0000162	C00148	29.0	1	-	-	20087.03	5882.72	7200.01	23033.83	22645.85	24219.59	22681.05	33598.4	35154.76	7159.23	2279.08	2002.35	1109.41	2000.5	595.01	3527.23	1728.05	2779.58	371.21	456.53	1.381891595123252	0.0003264532502875238	0.08355025107051403	-3.5812120261484504	down
MW7933	L-Leucine	C6H13NO2	134.1074	131.0946	0.9763	1.9592	2-MetDNA	--	HMDB0000687	C00123	--	1	-	-	60243.97	234485.61	131638.44	96522.62	41162.23	83551.19	94492.01	117810.99	75801.17	130008.27	67615.47	79857.16	38552.17	71288.62	49268.9	42943.96	47050.98	50539.96	41132.98	38120.66	1.0588003098888672	0.011389776713627814	0.4939126493772031	-1.0176721774767894	down
MW1044	Condurangogenin C	C32H44O7	539.3041	540.3087	0.9686	13.2179	1	--	--	C17766	--	1	-	-	172010.57	23871.94	397512.97	183138.24	148981.83	257196.05	262163.63	269259.48	218206.34	7155.6	84673.09	46349.97	31753.41	65186.27	13057.67	160491.2	43959.46	179738.35	22577.93	77510.92	1.00791825715673	0.01107120869622257	0.3739621153766881	-1.4190359711021885	down
MW9766	Xamoterol	C16H25N3O5	340.1874	339.1794	0.9639	4.9886	1	81801-12-9	--	C11775	--	1	-	-	133769.47	101667.34	126623.75	129838.91	120180.63	130496.48	131533.94	32227.3	29947.99	200882.66	952.19	1482.97	294.11	945.76	845.57	336.73	245.15	739.17	15234.8	16601.43	1.5340687435849854	6.458493139510654e-05	0.033133067785461906	-4.915584401267648	down
MW206	2-Keto-glutaramic acid	C5H7NO4	145.0332	145.0375	0.961	0.9223	2-MetDNA	--	HMDB0001552	C00940	--	1	-	-	178829.31	35580.39	167606.96	174124.0	191366.63	184387.18	188597.32	36462.16	30097.23	67065.91	1692.55	17423.75	1469.49	4150.56	1482.43	3049.83	2571.53	1279.74	1216.17	2624.82	1.3958444936662409	0.00048083662565781863	0.029471626130220425	-5.0845295247901845	down
MW7941	L-Palmitoylcarnitine	C23H45NO4	401.3456	399.3349	0.9607	9.0652	2-MetDNA	--	HMDB0000222	C02990	--	1	-	-	33256.05	45773.65	59657.41	67061.2	44382.52	42468.08	54730.29	41892.96	49611.61	52944.43	17579.13	10034.51	14833.53	8481.07	33722.44	42325.52	36559.63	38834.57	26000.71	5374.32	1.3042571666797385	0.00018110083777264223	0.4753066118018244	-1.0730696243488222	down
MW6510	Asp-Phe methyl ester	C14H18N2O5	278.1222	294.1216	0.9604	4.9923	2-MetDNA	22839-47-0	--	C11045	6377.0	1	-	-	46886.41	24861.32	42660.87	44826.42	41167.07	45139.97	43280.73	3396.31	5804.65	47267.84	609.29	13970.16	11689.17	12022.18	13221.12	12021.78	14063.76	13113.4	14002.22	14973.39	1.2584463787596034	0.00221489282690096	0.3466243414732459	-1.5285551244929578	down
MW2559	Sinapoyl-CoA	C32H46N7O20P3S	957.1548	973.1731	0.9535	2.3252	1	54429-80-0	--	C00411	--	1	-	-	31227.76	51609.82	220.4	27624.65	25355.17	28584.12	29058.33	42033.87	38989.57	23856.09	75942.87	35201.22	65641.48	61942.71	95196.21	39831.52	102399.33	30332.62	86280.09	54367.45	1.2198237262256622	0.0018143561774915688	2.167524038234487	1.116047993285349	up
MW1661	Isocitric acid	C6H8O7	226.9959	192.02700000000002	0.9517	0.9167	2-MetDNA	--	HMDB0000193	C00311	--	1	-	-	849.04	2409.72	17963.53	5203.65	6776.99	456.14	543.27	12177.08	1091.89	14362.26	56796.12	12466.73	8855.09	14734.76	57341.44	44471.05	63750.88	47497.84	132040.45	40320.42	1.1772003158472348	0.004913598914781303	7.734872497253514	2.951377510278557	up
MW6929	Citrulline	C6H13N3O3	176.1035	175.0957	0.9512	1.5807	2-MetDNA	372-75-8	HMDB0000904	C00327	16.0	1	-	-	840959.21	362059.88	429982.74	815750.17	765740.78	849356.22	903987.41	273432.32	257506.59	926964.86	3910.48	2016.89	16237.8	4236.0	4889.21	5782.48	5963.23	11158.24	17780.44	17308.6	1.5465453163861795	4.731358954666936e-05	0.013894643651776159	-6.169327354761816	down
MW1784	Lenticin	C14H18N2O2	281.106	246.1368	0.9508	5.0334	1	--	HMDB0061115	C09213	--	1	-	-	1073797.6	154911.35	614760.14	1036404.54	1005285.4	1032667.11	1035642.82	924366.01	1069224.72	42982.67	2188100.69	1576271.4	1483345.61	1997015.77	2155651.28	1580317.82	2274939.12	1546594.16	2855855.41	3269648.91	1.4267869406073848	3.568059543614347e-05	2.6192276870482067	1.3891414772897113	up
MW1748	L-Lysine	C6H14N2O2	146.101	146.1055	0.9491	0.733	2-MetDNA	--	HMDB0000182	C00047	--	1	-	-	12575.67	32561.86	21042.78	13805.14	14031.81	14834.15	15572.22	6890.83	8993.15	44049.79	12489.1	5313.6	2387.4	6853.46	9541.92	5060.1	8926.81	4477.28	5361.52	3259.72	1.0980860714377887	0.008900960100172843	0.3453667170398368	-1.5337990377159625	down
MW7864	Jamaicamide B	C27H37ClN2O4	461.2257	488.2442	0.9428	1.4536	1	--	--	C18213	65414.0	1	-	-	170769.03	334674.7	105805.55	153912.41	142299.42	161808.91	177123.45	115251.94	106538.31	511498.97	1519501.74	1365205.08	562032.87	508609.02	685161.49	316279.79	1175703.5	287567.4	308568.63	391224.58	1.0811857444843969	0.006931537484102063	3.5964622694155093	1.8465784688308817	up
MW7963	L-Threonine	C4H9NO3	167.0751	119.0582	0.9416	1.6805	2-MetDNA	72-19-5	HMDB0000167	C00188	32.0	1	-	-	61738.05	29428.98	60915.29	72362.65	69289.05	71249.96	80482.46	87048.57	69615.98	3215.51	127641.61	89022.94	237105.02	254871.09	182950.32	269817.5	179273.16	273417.92	190944.97	271864.04	1.512334252882481	2.472412870385915e-05	3.430941733370888	1.7786046252570782	up
MW7746	Hypoxanthine	C5H4N4O	138.0486	136.0385	0.9389	1.2856	2-MetDNA	68-94-0	HMDB0000157	C00262	83.0	1	-	-	13698.95	65154.94	9995.53	20234.81	33636.3	20260.46	6029.49	26712.35	40136.3	2720.88	15295.31	80816.66	45289.14	32795.13	191729.96	63674.53	148249.22	90157.37	81019.74	83885.43	1.1210614098421836	0.006213011881361238	3.4911243821307574	1.8036917582904173	up
MW751	Benzoyl coenzyme A	C28H40N7O17P3S	909.0889	871.1414	0.9294	1.3284	2-MetDNA	6756747	--	C00512	--	1	-	-	48011.04	57526.95	92768.32	50421.79	50576.43	40174.01	38503.99	60361.31	43052.83	37797.41	25624.16	87096.35	138077.72	112386.78	130720.25	215507.15	84280.28	215466.38	103860.75	138126.6	1.2042653588840937	0.003039871632493417	2.409785604643258	1.2689047975436725	up
MW9222	TEGASEROD MALEATE	C16H23N5O	302.1968	301.1903	0.9271	4.7878	1	145158-71-0	--	D02730	--	1	-	-	1173022.95	1279759.38	308903.98	1159604.45	1093780.76	1151172.78	1152315.51	497953.06	535112.27	1498289.34	307646.61	471752.0	174206.01	437663.67	510423.67	346102.21	568195.58	358302.76	185246.63	191624.47	1.3340333831663214	0.0005257107187142137	0.3605273545481584	-1.471819368642386	down
MW1826	Lisuride	C20H26N4O	309.1736	338.2107	0.9229999999999999	13.2179	1	--	HMDB0014727	D08132	--	1	-	-	439253.09	476543.9	537474.24	363009.49	508482.57	487388.3	570159.4	765311.51	1421670.51	1007968.11	159495.55	229834.49	124462.64	125696.88	131473.98	228639.42	137030.34	139622.52	121468.1	162138.97	1.3259596588410418	0.0008628378729039352	0.2371599456887611	-2.0760677234339378	down
MW1486	Glycerol 3-phosphate	C3H9O6P	152.9953	172.0137	0.9166	1.278	2-MetDNA	--	HMDB0000126	C00093	--	1	-	-	97739.31	182981.37	132968.11	100247.04	104289.43	117228.28	116700.22	43723.85	56308.45	255425.5	39294.3	29793.61	33087.93	51130.21	32368.67	27055.54	36858.81	31201.22	45593.18	34077.32	1.3035831585772588	0.0017034920972181869	0.2984906752631616	-1.744242231945763	down
MW2427	Pyroglutamic acid	C5H7NO3	258.0802	129.0426	0.9152	1.6774	2-MetDNA	98-79-3	HMDB0000267	C01879	3251.0	1	-	-	72041.84	30048.49	60473.73	66579.38	66331.69	90183.71	63951.6	12764.77	14296.61	60609.01	384.48	1905.71	828.48	948.08	13349.1	9139.19	13454.6	8225.51	815.64	1179.97	1.4468298391943497	0.0001758024070470858	0.09349069833740392	-3.419033355577102	down
MW7114	D-Ornithine	C5H12N2O2	155.0793	132.0899	0.9145	0.7115	2-MetDNA	1069-31-4	HMDB0003374	C00515	6910.0	1	-	-	157209.06	123111.52	147642.35	145323.65	160131.22	136843.89	142589.59	110468.33	92264.32	91528.62	41027.53	14399.21	20228.97	15531.54	16976.34	10949.04	12859.13	6099.76	20847.12	7442.46	1.687018193982395	2.027677922632212e-08	0.12727373782770274	-2.973993336405984	down
MW7091	D-erythro-3-Methylmalate;(2R,3S)-3-Methylmalate	C5H8O5	166.0724	148.0372	0.8995	1.6769	2-MetDNA	--	--	C06032	--	1	-	-	943719.95	415031.47	867068.51	897450.81	886728.42	891847.5	974797.16	1120504.68	1001595.99	277454.62	1589925.08	983298.7	2758108.23	3287813.93	2154326.28	3459969.68	2172202.67	3246216.29	2327909.1	3573498.72	1.465816747811808	9.153569475009179e-05	3.087560888805152	1.6264675879073751	up
MW891	Cephaeline	C28H38N2O4	485.282	466.2832	0.8991	13.2402	1	483-17-0	--	C09390	--	1	-	-	158975.68	700340.08	402299.7	760367.38	585178.94	320189.53	264688.18	271015.92	937917.41	369003.68	125770.72	341788.28	234910.9	199263.87	164479.63	185143.28	199427.19	210933.27	194002.21	264403.18	1.0514462935406543	0.009493752522266604	0.4444723218238077	-1.1698345125270402	down
MW7046	Cyanidin 3-O-rutinoside 5-O-beta-D-glucoside;Cyanidin 3-rutinoside 5-glucoside	C33H41O20	722.2052	757.2191	0.898	0.7839	1	135558-26-8	--	C12646	--	1	-	-	14070.01	28356.63	3690.77	11135.68	11100.12	10025.24	10211.08	6459.64	5736.61	34111.43	33887.28	78138.95	43995.84	57033.05	62977.59	43442.76	61140.51	43720.59	38602.56	36645.31	1.4751288662892357	5.428339865333129e-06	3.7034453121751	1.8888680334523409	up
MW605	Anagyrine	C15H20N2O	281.1063	244.1576	0.8953	6.2971	1	486-89-5	--	C10750	--	1	-	-	846608.24	229020.61	937199.56	815151.09	760654.44	1666092.17	846131.38	1770356.54	1714690.59	47140.28	4361988.39	1005771.31	4185389.85	3354415.25	2963408.46	2035135.56	3092250.46	981401.52	4795155.05	3545922.77	1.3022870573949643	0.0006686044578433567	3.1475861407019914	1.6542458610461306	up
MW9059	S-Farnesyl Thioacetic Acid	C17H28O2S	373.1002	296.181	0.8939	12.6274	1	135784-48-4	--	--	43440.0	1	-	-	25663.72	12702.05	17804.71	18135.32	28938.34	23435.77	19821.69	15991.01	13310.88	7495.52	30633.51	38544.49	39300.49	37704.32	45793.3	66502.6	62313.81	62914.73	24756.05	18484.35	1.302755363300132	0.0010477906008691939	2.329241439983773	1.219860191379469	up
MW6622	beta-Funaltrexamine;beta-FNA	C25H30N2O6	499.1818	454.2104	0.8938	0.8962	1	72782-05-9	--	C18127	--	1	-	-	130247.43	323346.54	79029.68	127927.28	118462.65	130470.59	131238.09	161339.7	147578.84	201921.57	1295234.48	1490816.75	813785.15	921266.69	847219.67	645537.03	831307.19	600011.62	403613.84	433063.57	1.4346825800501777	0.00014977392368866531	5.337752545519651	2.416232424695562	up
MW9372	TG(a-25:0/i-18:0/8:0)[rac]	C54H104O6	714.0371	714.0374	0.8923	4.0563	1	--	HMDB0069788	--	--	1	-	-	374178.23	426223.74	31262.14	411878.62	359021.37	419219.82	473873.62	404210.06	363817.12	558546.92	426916.94	124656.0	245830.55	122199.23	76069.68	62429.42	56097.79	58878.59	93194.15	135635.09	1.2623692465806913	0.00048032183691341707	0.3667772055803505	-1.4470241135826547	down
MW1026	Clovoxamine	C14H21ClN2O2	265.1112	284.1292	0.8916	6.9283	1	54739-21-8	--	--	85075.0	1	-	-	305105.14	10798.4	521211.64	323861.25	255874.96	341741.6	315207.46	508030.72	463728.11	951.4	1422328.6	820899.79	430193.98	692850.71	1204664.25	636524.98	1162157.66	521103.14	1429969.13	788581.23	1.3303362550686395	0.0004112159104263497	2.9900677945432315	1.580178195374053	up
MW7544	Gln Leu Val Arg Ala	C25H47N9O7	632.3725	585.3598	0.8913	2.4723	1	--	--	--	264534.0	1	-	-	202518.96	185534.64	725045.2	174809.98	170714.48	201624.53	163841.88	87316.25	77017.39	118352.6	15637.11	3086.57	807.17	976.52	1941.7	1921.99	1276.2	573.73	778.56	661.82	1.156064067929898	0.006402655449127322	0.01312971629716423	-6.251020446513933	down
MW9122	Ser Pro Ala Ile Asn	C21H36N6O8	518.2935	500.2595	0.8908	3.6947	1	--	--	--	264145.0	1	-	-	330880.5	3784.74	829790.67	298401.72	353363.3	378014.15	300898.79	235780.15	237366.23	157079.37	6331.99	9812.19	24736.67	21626.15	25759.9	38446.85	25284.2	28943.53	16594.47	17953.38	1.2801343163711638	0.0018811652279839652	0.06894865109954931	-3.8583338624158436	down
MW8259	MILTEFOSINE	C21H46NO4P	454.3294	407.3164	0.8885	8.4815	1	58066-85-6	--	D02494	43997.0	1	-	-	71554.88	21967.57	18383.41	76330.85	60811.65	74199.23	86247.14	27563.65	20530.92	25902.91	57272.62	2452.12	19665.07	16836.59	5324.01	16001.87	4952.42	7472.85	11176.91	7545.94	1.0842920178929965	0.004937884066128109	0.30755490352160997	-1.701084117060244	down
MW9309	TG(21:0/a-15:0/15:0)[rac]	C54H104O6	650.2544	586.2383	0.8852	12.9804	1	--	HMDB0065810	--	--	1	-	-	354572.12	316431.79	613238.99	658310.25	222581.91	308463.37	273479.43	463415.91	523654.52	264013.97	63368.23	26567.86	13219.71	33499.99	93991.27	93341.53	161845.66	56491.94	306327.11	496745.8	1.1925420839772354	0.001175032383964852	0.3365043768883957	-1.5713028248983771	down
MW6848	Chivosazole B	C48H69NO12	915.4982	851.482	0.8849	13.1113	1	--	--	C15729	--	1	-	-	197103.01	385374.05	313778.72	271382.98	139905.59	376159.62	361165.08	326869.74	292686.57	254651.1	77356.66	18442.16	41148.88	46855.33	22932.19	37773.2	24519.96	40998.55	45581.55	239993.83	1.5434174165597163	1.404912574834376e-06	0.20403792711890803	-2.2930907457271	down
MW7958	L-Tetrahydropalmatine	C21H25NO4	711.3636	355.1784	0.8826	10.6749	1	10097-84-4	--	C02890	64371.0	1	-	-	34626.31	53036.62	25750.32	23343.7	18727.33	42025.64	19746.16	14224.29	35779.52	45406.42	54475.99	179728.26	140418.54	122045.11	150209.06	121643.67	146836.88	68606.03	6543.28	50168.85	1.2105775918793884	0.0023878549965179715	3.3283908010428114	1.7348248366117052	up
MW676	Asn Phe Ser Arg	C22H34N8O7	559.2040000000001	522.255	0.8822	1.5278	1	--	--	--	193393.0	1	-	-	272037.67	521828.06	184035.92	265492.44	288590.99	259340.33	310448.45	198591.41	177498.52	724628.65	878157.38	1074240.27	466936.11	770610.47	857583.25	379649.51	1036796.05	420651.49	469244.13	506421.03	1.1263733738172466	0.0023044733218114087	2.1421720171180167	1.0990743336263802	up
MW1878	Mallotophenone	C21H24O8	403.1396	404.1471	0.8818	5.9859	1	98569-63-2	--	C10708	--	1	-	-	87217.17	28808.31	135499.85	88099.97	91439.71	73183.0	89240.52	64091.28	83790.02	2434.55	109650.24	4056.11	301966.98	139793.74	292287.32	324301.92	303227.37	294171.97	480910.0	263399.93	1.2559545153361948	0.002201537608461716	3.3796057775298385	1.7568549695924818	up
MW6394	Aminopentol;AP1	C22H47NO5	406.3529	405.3454	0.8808	6.72	1	145040-09-1	--	C19805	--	1	-	-	40820.07	71405.23	20321.91	34051.15	42614.28	25522.04	28615.8	34799.78	37111.36	37255.04	95926.75	120032.54	92849.37	60771.17	93075.64	55236.98	58997.19	43724.28	101070.67	53344.26	1.2620694341136072	0.000708094978941215	2.0805213114495342	1.056945066448082	up
MW702	Asp Pro Glu	C14H21N3O8	340.1147	359.1329	0.8807	4.0703	1	--	--	--	19713.0	1	-	-	339792.83	188915.75	193380.64	344766.13	317301.89	347459.13	366610.18	112437.21	100365.2	354959.83	7877.68	4377.3	922.54	6544.21	3568.33	2030.99	3616.05	855.76	1353.32	288.11	1.5743367718395571	2.5437107010898488e-05	0.01179085602981849	-6.406187726322014	down
MW9205	Sultamicillin tosilate;Sultamicillin tosylate	C25H30N4O9S2.C7H8O3S	767.1755	766.1648	0.8801	1.0533	1	83105-70-8	--	C13129	--	1	-	-	126554.22	140465.31	16972.55	58311.56	159570.92	134034.87	67561.88	33717.29	34113.26	650277.42	532640.11	900688.4	126725.63	687823.98	667955.79	97035.01	684094.37	374945.35	666622.24	405008.94	1.1262618409870806	0.0019854730694152047	3.618187105259441	1.8552670151593416	up
MW6974	CL(i-14:0/i-15:0/i-24:0/i-13:0)	C75H146O17P2	834.1719	408.0693	0.8789	4.7611	1	--	HMDB0092171	--	--	1	-	-	18572.47	3665.09	17933.01	40039.84	33346.15	19967.98	52687.75	357530.93	286003.25	8001.06	565113.31	198912.82	663702.01	204525.34	288047.01	306734.99	291551.06	249559.45	678056.81	202697.18	1.2193628027301593	0.0014911704491436045	4.3556081627599665	2.1228741728174523	up
MW5515	(6S)-5-Methyltetrahydrofolic acid	C20H25N7O6	424.1724	459.1866	0.8788	2.1577	1	31690-09-2	--	C00440	--	1	-	-	61904.27	65614.29	106199.8	62179.33	68568.99	73621.37	75984.28	37949.64	17038.23	72928.95	2646.56	2126.76	4619.21	3395.24	6763.98	1465.67	4697.98	1507.56	2224.94	1118.63	1.5966601065370765	1.7435641995318247e-05	0.04761222210686893	-4.392524227384367	down
MW7063	Cyclopropanecarboxylate	C4H6O2	173.0812	86.0368	0.8782	3.0402	1	1759-53-1	--	C16267	--	1	-	-	1661834.65	512277.79	279563.79	2091073.37	1487144.55	2146389.59	2181848.91	2147993.86	1937408.59	368477.58	181875.98	291667.64	149031.11	280758.71	185538.95	143338.57	184860.54	129964.32	291089.6	124418.17	1.3471509215024315	0.0005937165747278929	0.13247886527392927	-2.916165874053172	down
MW1096	Cys Leu Met	C14H27N3O4S2	346.1267	365.1443	0.8775	2.4833	1	--	--	--	16369.0	1	-	-	71270.91	198432.15	10489.39	69119.21	89215.86	90683.34	89525.5	124042.83	128503.15	368690.4	530493.61	296085.53	193841.02	234425.93	384855.43	213259.04	312139.71	169296.95	307755.51	125697.34	1.0561331269130745	0.005850797350699283	2.23218622531976	1.1584573923722694	up
MW9273	TG(19:0/22:0/16:0)	C60H116O6	627.101	644.1047	0.8763	0.8189	1	--	HMDB0063627	--	--	1	-	-	22399.65	43841.44	31415.41	18951.04	20012.42	18143.32	16892.84	1316.77	2146.89	36248.46	43378.91	95375.27	48705.91	129858.34	160797.65	98551.68	160184.61	101510.33	86311.18	76761.5	1.4362975943355332	0.00011283852951435957	4.7378706469808325	2.2442388107548528	up
MW8859	Prephytoene diphosphate	C40H68O7P2	764.4772	722.444	0.8753	3.8169	1	--	HMDB03023	C03427	--	1	-	-	35494.72	64936.44	133657.55	48971.83	34120.02	45683.84	67127.66	63567.23	22175.87	89948.3	21461.91	164.94	11106.54	633.45	140.01	11588.91	8002.55	11756.55	178.91	14112.09	1.3851139808766997	0.0005368284499860861	0.1306719850002178	-2.9359782225642217	down
MW6773	CAY10638	C16H13NO3S2	369.9986	331.0337	0.8744	0.8332	1	--	--	--	64838.0	1	-	-	56980.83	65087.29	112818.63	54996.66	57860.96	45638.11	41985.23	42678.76	42159.73	42165.17	70978.62	70319.3	111441.4	166166.86	141288.06	244049.79	143989.04	230477.9	192109.74	185347.45	1.3613945499362687	0.0004218187315891783	2.7671539538010257	1.4684029121829685	up
MW1887	MAM2201 N-(4-hydroxypentyl) metabolite	C25H24FNO2	370.1615	389.1791	0.8742	4.5341	1	--	--	--	85212.0	1	-	-	177449.05	90591.53	203665.1	197105.77	139005.48	198508.83	216547.59	61368.21	50416.93	269793.36	1270.52	209.29	455.07	327.19	222.53	538.1	429.22	12437.98	510.12	211.55	1.5399164374005467	6.761300985459356e-05	0.010353423818857512	-6.593748252034682	down
MW2656	TG(18:0/20:1(11Z)/20:1(11Z))	C61H114O6	235.1334	198.1844	0.8721	5.9144	1	--	HMDB0005407	--	--	1	-	-	157562.13	15623.97	54747.51	154205.72	155952.29	159890.61	155965.5	115647.41	117629.37	1878.59	391257.61	59523.76	123060.61	186659.74	211461.3	625210.1	189605.18	602242.07	340633.95	246359.67	1.0641950280261443	0.013222699171105351	2.7325365155971	1.4502407751355535	up
MW1615	Ile Phe Arg Lys	C27H46N8O5	543.3407	562.3591	0.8690000000000001	10.0024	1	--	--	--	161367.0	1	-	-	107870.75	65528.48	90722.37	104754.74	98160.93	118306.27	129777.95	46743.64	33810.58	76463.07	141159.84	13381.81	30150.57	51076.57	27862.51	50899.72	23123.8	29346.15	29040.32	33700.45	1.0081265815703964	0.009247609193085064	0.4927446753371063	-1.0210878134841652	down
MW2459	Rehmaionoside A	C19H34O8	389.2177	390.2254	0.868	5.6489	1	--	--	C17450	--	1	-	-	177116.09	226006.06	4249.03	160255.27	162555.63	195457.59	191863.59	4365.39	8273.92	50533.18	5132.89	6722.24	10435.88	340.83	74687.64	40404.35	77633.31	13635.62	11087.86	22984.94	1.0281683140681066	0.010792462102428893	0.22280931915472985	-2.1661185192240358	down
MW8459	Nicotinate D-ribonucleoside	C11H14NO6	299.1178	256.0821	0.8652	3.8836	2-MetDNA	--	HMDB0006809	C05841	--	1	-	-	26841.13	8633.81	11812.9	24292.42	21521.89	28354.38	36869.79	32163.87	27958.19	2542.27	102558.91	58421.73	73575.96	136733.78	85071.85	178930.39	59596.67	144795.49	56727.27	63404.63	1.4044118539865271	0.00036971141285443445	4.3432456531532	2.1187735536583125	up
MW5781	2-Butoxyethanol	C6H14O2	160.1327	118.0994	0.8652	1.2428	1	--	HMDB0031327	C19355	--	1	-	-	421302.98	381255.58	1388878.5	666379.72	571021.76	726791.42	835821.08	569428.9	633365.34	398012.26	1456743.4	3858740.42	4517707.11	5060840.33	2640699.18	2608009.74	3521578.14	4089131.21	6673060.82	5006211.88	1.4883481538997243	5.301594107409331e-05	5.981671982736282	2.5805487994818903	up
MW1581	Hydrogenobyrinate;Hydrogenobyrinic acid	C45H60N4O14	917.3602	880.4106	0.8648	0.8006	1	--	--	C06399	--	1	-	-	1669.95	29576.79	1550.81	2046.69	2427.13	3703.21	2625.87	3299.02	4585.77	22114.73	24576.44	96925.86	40451.63	52454.19	77057.62	34269.96	71779.6	36777.95	27607.41	28742.22	1.3250192266095968	0.00035565377900191624	6.666346195521548	2.736896241179499	up
MW538	Ala Arg Leu Glu Ala	C23H42N8O8	529.2684	558.3126	0.8635	13.2495	1	--	--	--	264537.0	1	-	-	30474.56	22312.07	21372.88	29677.68	37573.23	59136.0	55955.16	33901.27	16760.74	38791.69	13084.82	3489.02	4811.64	4330.92	6559.65	2708.41	11699.06	2783.7	17296.69	3013.22	1.4460188177525712	9.708945556350546e-05	0.2016940744480038	-2.3097593951211923	down
MW6557	Azadirachtin A	C35H44O16	720.2634	720.2629	0.8586	4.7864	1	11141-17-6	--	C08748	41274.0	1	-	-	42312.28	94765.51	209049.1	1574.32	1393.16	2913.62	3315.11	153199.66	88350.45	43125.53	1283338.26	421901.8	1203315.99	947995.71	597962.84	960794.09	636507.0	703298.22	1591408.71	1251260.21	1.5470219389819662	2.488597877213781e-05	14.996565196362727	3.9065601995006216	up
MW5661	1,2-Dioctanoyl PC	C24H48NO8P	492.3078	509.3118	0.8585	5.2406	1	19191-91-4	--	--	45203.0	1	-	-	110342.64	11862.2	8483.7	109842.66	100274.56	102013.8	110246.18	49530.79	46949.15	12215.19	16068.54	831.2	1741.69	2210.83	16618.86	4007.04	15353.81	5104.39	7647.56	3858.87	1.2157480435771948	0.002429293006985574	0.11098085929438532	-3.171617216350025	down
MW661	Ascorbyl palmitate	C22H38O7	395.2433	414.2618	0.8583	5.8165	1	--	HMDB0039883	--	--	1	-	-	59527.79	3474.05	11420.84	57436.87	46095.34	51438.17	53665.95	68781.62	74786.88	1779.01	194609.35	17656.05	74230.66	70865.92	123134.52	218548.25	128697.48	199816.89	227575.21	143117.01	1.2753565985014392	0.0017115948636550447	3.263842343015694	1.7065713708992558	up
MW7706	His Phe Gln Asp	C24H31N7O8	612.1775	545.2234	0.8578	4.053	1	--	--	--	153341.0	1	-	-	501417.28	560681.3	393754.28	548160.07	482218.6	546118.6	606587.44	547158.18	476475.25	717325.23	584259.95	192309.64	343063.87	125193.64	95837.68	86790.58	80529.88	68511.73	134504.25	212194.74	1.460839063307805	3.545666095062858e-05	0.3574782631076882	-1.4840725751226442	down
MW9744	Valeroidine	C13H23NO3	288.1811	241.1678	0.8577	4.3629	1	490-96-0	--	C10869	--	1	-	-	407084.12	309188.57	229385.27	409907.39	401549.14	422785.99	407984.72	242508.31	243735.76	372506.04	294434.18	113081.19	103457.73	226769.06	128744.24	134991.24	122448.38	141030.68	90478.3	89176.23	1.456478659239125	1.0295981877707812e-05	0.41913666520175	-1.254507363943708	down
MW1292	epsilon-Rhodomycinone;Rhodomycinone	C22H20O9	409.0922	428.1107	0.8573	6.5047	1	21288-60-8	--	C12425	--	1	-	-	3546.81	31083.47	48094.33	5778.77	5291.38	3912.22	4451.29	16612.16	1990.25	1574.03	46889.09	111698.57	17195.25	28912.51	119118.51	86641.73	124606.44	79933.94	50133.28	25750.49	1.246644257172009	0.001497242536479779	5.647455329726126	2.497600954226157	up
MW1851	Lys Lys Leu Phe Tyr	C36H55N7O7	696.408	697.4163	0.8555	10.5582	1	--	--	--	264578.0	1	-	-	13722.83	25354.74	31259.59	20105.02	11251.1	20340.7	18884.2	8326.01	14335.33	16816.86	36551.12	43625.01	43366.11	40079.28	31451.74	63198.33	35052.25	51543.09	185.23	46265.43	1.1647125256169346	0.002738031100173593	2.1692097701738806	1.117169573414157	up
MW2889	Thr Arg	C10H21N5O4	296.1346	275.1594	0.8538	0.9533	1	108320-96-3	--	--	23730.0	1	-	-	1051432.84	614407.52	863684.19	1002961.96	1028010.97	1033146.54	1004212.32	888146.89	883016.41	558248.13	408893.31	364550.53	467557.43	596246.31	363979.86	364661.3	355074.45	407174.55	392284.81	381954.47	1.5593011126776315	3.630088119723253e-06	0.4595333225901434	-1.1217586140205462	down
MW7499	Gamma-Butyrolactone	C4H6O2	104.0704	86.0368	0.8528	1.4969	2-MetDNA	--	HMDB0000549	C01770	--	1	-	-	158609.13	233664.84	48549.31	178687.27	124661.53	144100.74	143577.8	132571.76	135856.31	190151.74	254179.86	313540.96	346074.32	218614.12	540076.94	252955.59	438988.85	210118.74	672293.09	364673.32	1.261862927141166	0.001422929076041488	2.423136107064051	1.2768754429532936	up
MW5896	2,4-Pentanedione	C5H8O2	240.0707	100.0524	0.8494	1.4688	2-MetDNA	--	HMDB0031648	C15499	--	1	-	-	2804.94	27346.94	9666.52	3006.99	7543.22	5056.21	3383.77	22026.95	20272.81	16765.81	14979.91	49043.01	19447.13	52947.94	72773.37	40719.85	75670.54	46390.48	46054.48	41856.36	1.3654870481480097	0.0002296317024908959	3.901474844020097	1.9640195978043269	up
MW1685	JWH 018 N-(5-hydroxypentyl) D-Glucuronide	C30H31NO8	552.203	533.205	0.8492	9.5117	1	--	--	--	96595.0	1	-	-	43093.82	56131.91	4350.79	57607.09	40727.91	88313.54	94779.37	75460.81	43561.85	90472.57	89210.89	2618.85	2510.68	6118.79	880.77	3220.11	691.4	3964.23	3405.21	2131.61	1.196317690980759	0.0011687919078995825	0.19302372687647965	-2.3731498974297796	down
MW7500	gamma-Glutamylglutamic acid	C10H16N2O7	322.0692	276.0958	0.8489	4.3755	2-MetDNA	--	HMDB0011737	C05282	--	1	-	-	92280.38	47170.68	53041.71	98935.59	88522.25	103253.48	101230.44	4577.57	1163.28	55393.41	21451.47	18330.86	11261.56	11892.62	15785.81	12013.47	16401.27	10872.08	14749.98	681.55	1.2494683330579883	0.0023157058913826464	0.20670248014932693	-2.2743723956369752	down
MW1151	DEOXYKHIVORIN	C32H42O9	569.2819999999999	570.2829	0.8485	4.6404	1	--	--	--	43676.0	1	-	-	57179.59	8107.15	18219.41	73671.18	57076.08	57387.32	71129.14	57037.0	56737.03	8814.67	14168.22	1112.85	8321.55	5706.64	12189.72	9332.22	10935.39	6778.67	9851.5	5507.88	1.3007619966678472	0.0008811966041460347	0.18030105258403212	-2.4715202757469985	down
MW1162	Destomysin;Destomycin A	C20H37N3O13	564.1802	527.2326	0.8442	3.9216	1	14918-35-5	--	C01688	--	1	-	-	4686.18	1363.83	249.06	5083.49	5296.91	4890.5	4402.35	7979.01	5872.82	665.35	70779.86	18263.9	51627.52	55312.7	58000.51	33298.5	64034.47	27397.05	49219.65	38372.85	1.5787309270552277	1.856931212341172e-05	11.516739154595635	3.52566038532792	up
MW1121	D-Valine;(R)-2-Amino-3-methylbutyric acid	C5H11NO2	116.0714	117.079	0.8436	0.938	1	640-68-6	--	C06417	--	1	-	-	944208.91	817497.51	405319.41	955401.38	935247.48	968381.6	972204.83	671731.21	656107.07	964242.15	479576.66	331153.4	313850.78	391961.27	305742.38	241094.88	288759.98	226345.63	310669.73	225922.86	1.5626864343159548	4.6172317657024965e-06	0.3757477965428336	-1.4121634509614185	down
MW6841	Cetyltrimethylammonium bromide;Cetrimonium bromide;Trimethylcetylammonium bromide;Hexadecanyltrimethylammonium bromide;CTAB	C19H42N.Br	363.2488	363.2501	0.84	0.8874	1	57-09-0	--	C11275	--	1	-	-	36898.12	47909.81	121783.2	35510.04	34426.98	33529.12	36293.96	17994.58	17601.87	37977.34	150006.96	354969.78	215836.9	254560.31	350211.19	159116.17	359434.69	167174.27	249308.05	110719.98	1.4636786373826085	5.8714136674423156e-05	5.6470517046114574	2.4974978407481108	up
MW1191	Dicrotophos	C8H16NO5P	473.145	237.0766	0.8393	5.5848	1	141-66-2	--	C18656	--	1	-	-	129692.81	206297.32	179605.23	125044.67	132008.23	118391.88	125654.4	44556.5	68060.07	81671.71	445667.45	78902.84	371417.45	348371.3	624261.53	659418.43	652241.94	518320.91	471178.21	460526.96	1.47967364396781	0.00011589746344480008	3.823594309950656	1.9349294589694936	up
MW2403	PS(14:1(9Z)/24:1(15Z))	C44H82NO10P	834.5648	815.5676	0.8341	10.9903	1	--	HMDB0112292	--	--	1	-	-	1682539.56	6454575.27	25690528.1	27869842.09	30513525.04	7793102.95	6489319.44	5162714.38	5772497.79	13566650.53	884281.25	939460.05	2227977.77	2569717.3	3179680.09	2591557.99	2834554.7	2542599.63	1054115.87	837348.33	1.0837983279050003	0.009678942944685994	0.15009159647669987	-2.7360848911518394	down
MW7935	L-Metanephrine	C10H15NO3	242.0789	197.1052	0.8334	1.3525	2-MetDNA	--	HMDB0062493	C05588	--	1	-	-	83105.87	76190.01	30447.18	79980.63	74935.43	70965.26	66939.86	102555.71	63172.95	42926.7	322317.74	184774.37	167260.87	123262.95	104729.48	133504.46	105825.53	126483.91	96808.4	146175.67	1.1752957691830093	0.0034457781241335897	2.1861986841808307	1.1284245207064691	up
MW6164	5,10-Methenyltetrahydrofolate	C20H22N7O6	457.1715	456.1632	0.8333	0.7794	1	--	HMDB01354	C00445	--	1	-	-	320378.14	622548.01	408055.04	314623.52	317444.46	307235.43	316398.31	169358.54	179437.47	698735.57	957646.49	1830077.93	1002948.08	1703975.0	1379829.51	1017987.84	1406741.38	999277.67	932579.56	744563.68	1.4673986390071934	1.875949919410816e-05	3.2772096911038187	1.7124679861663192	up
MW172	2-(5'-Methylthio)pentylmalic acid;2-(5'-Methylthio)pentylmalate	C10H18O5S	269.0873	250.0875	0.8328	1.0864	1	--	--	C17222	--	1	-	-	975033.84	808428.79	2169718.88	744191.24	1014964.4	1061774.45	937306.41	1677756.14	1400701.1	433856.87	2206148.83	1788908.49	3091988.69	2573826.14	2456744.98	2982855.22	3248393.48	3517442.26	2449528.0	2722128.52	1.5282910402557408	1.7803401395504898e-06	2.4089994594418385	1.2684340698484189	up
MW9064	S-Sulfanylglutathione;Glutathione hydrodisulfide	C10H17N3O6S2	696.1473	339.0559	0.8309	3.9936	1	--	--	C17267	--	1	-	-	295516.7	109119.02	163038.38	298483.45	285896.35	312030.96	334218.85	255124.27	230261.53	168149.71	22941.43	1118.62	14132.58	27047.0	1922.81	1577.29	15376.79	2118.44	857.8	1745.42	1.6231304235727342	3.1304524142965097e-06	0.03623328123448486	-4.786540729653719	down
MW541	Ala Asp Phe Asp	C20H26N4O9	465.1616	466.17	0.8274	4.6851	1	--	--	--	104362.0	1	-	-	20663.67	22394.1	1782.83	21590.24	15528.17	6787.79	15679.95	38214.97	43704.95	16413.75	52394.31	31875.09	55157.43	41053.73	56336.53	69367.72	53333.89	59202.71	76965.87	43148.43	1.4765222385030228	1.7565210827129597e-05	2.657499476475734	1.410069407547185	up
MW1831	Lolitriol	C37H49NO7	640.3272	619.3509	0.8256	9.5539	1	--	--	C20548	--	1	-	-	38463.59	64027.95	58882.77	32568.09	16841.0	29486.68	33449.32	18144.13	28988.43	48910.54	128702.67	131881.93	80451.77	87292.38	84743.77	164566.32	84527.07	95321.13	8413.66	93949.63	1.244328190179243	0.0012720920090250598	2.595856340218383	1.3762105439728685	up
MW2595	strychnine N-oxide	C21H22N2O3	699.3205	350.163	0.8256	4.7349	1	23257-79-6	--	--	34472.0	1	-	-	189982.48	146479.67	249530.15	220068.04	202892.26	255530.24	270859.63	100951.9	107429.63	265151.28	18274.47	1252.11	11446.42	13301.78	2706.46	1609.85	1111.09	10166.53	2173.24	324.23	1.6438891806020095	4.297737314258292e-06	0.031045322037115217	-5.009480292739461	down
MW601	Amprenavir	C25H35N3O6S	1009.4395	505.2247	0.825	13.2976	1	--	HMDB0014839	C08086	--	1	-	-	27151.43	29041.47	31542.09	28555.0	23195.7	25474.44	33227.68	29128.34	22914.56	22650.51	2805.63	6980.26	6706.52	5394.03	8246.09	4396.88	5051.62	6871.81	3543.05	3217.7	1.725013531117536	2.4905380106200453e-10	0.19500642074232885	-2.3584064682426487	down
MW5998	3-Propylmalate	C7H12O5	195.1091	176.0685	0.8228	2.0324	2-MetDNA	--	METPA0250	C02123	--	1	-	-	2913.55	14879.51	4063.53	2795.57	1483.81	2465.74	2340.02	14109.27	13584.91	10335.39	14813.73	15865.1	21698.13	20794.89	8885.16	26934.51	10175.89	23411.72	24717.12	16800.58	1.2919248215827464	0.0003536578242844352	2.6691802242381977	1.4163967201807222	up
MW6987	CL(i-14:0/i-17:0/i-17:0/a-15:0)[rac]	C72H140O17P2	304.2122	286.1794	0.8214	4.5017	1	--	HMDB0092851	--	--	1	-	-	181427.57	92193.5	154319.05	172756.59	164714.31	177763.45	181032.28	201583.7	189773.11	219948.74	986363.04	503038.75	237747.24	324416.69	453809.35	266008.96	436667.37	246144.49	297548.53	311024.68	1.078104171917132	0.009384579820111164	2.3409624351265044	1.2271017840477358	up
MW8392	N1-(3-Aminopropyl)agmatine;N1-Aminopropylagmatine	C8H21N5	232.1574	187.1797	0.8146	3.0494	2-MetDNA	--	--	C20560	--	1	-	-	127486037.0	82222736.5	16412529.61	104978522.92	103621850.33	111243118.62	135255352.65	100893648.45	89143565.48	69162495.52	12528022.17	2603912.28	28796039.76	26961483.83	27358010.27	26384760.72	25296834.85	28536274.9	36357387.63	31755180.71	1.4500555668027235	7.478258491211498e-05	0.262199809227363	-1.9312614590105224	down
MW6341	Ala Lys Lys	C15H31N5O4	708.5113	345.2376	0.8075	13.1046	1	--	--	--	15715.0	1	-	-	344204.22	200942.66	215787.6	717792.42	207745.75	197038.32	222984.76	240725.17	263728.21	232713.46	955696.81	1008384.04	844268.55	846367.71	775721.57	275432.14	800109.55	869888.98	769410.31	618368.88	1.4370972196155032	1.4877560705697904e-05	2.7301581495303786	1.4489845243812909	up
MW1055	Coumatetralyl	C19H16O3	291.0984	292.1099	0.8071	4.4288	1	5836-29-3	--	C16806	--	1	-	-	620770.33	246314.46	401477.99	643238.75	605264.38	652830.84	685746.12	276349.31	215887.15	437630.6	30459.71	19737.97	21939.9	32047.78	12978.78	8794.86	14688.47	9901.4	17881.66	4458.33	1.5694011365556948	2.4446280543102312e-05	0.036127573138271585	-4.790755844469487	down
MW677	Asn Thr Gln Glu	C18H30N6O10	509.1996	490.2023	0.8035	4.062	1	--	--	--	198142.0	1	-	-	47590.71	1994.25	12025.0	56774.92	43763.29	49709.34	52281.83	43921.39	32296.39	2655.76	12316.54	8789.12	1816.58	664.5	443.7	415.78	334.86	367.14	2208.81	1089.78	1.2948636624843912	0.0009880407520033037	0.08293219193401717	-3.5919239658771187	down
MW424	5-NITRO-2-PHENYLPROPYLAMINOBENZOIC ACID [NPPB]	C16H16N2O4	337.0609	300.111	0.8022	4.6292	1	107254-86-4	--	C13705	44306.0	1	-	-	4611911.91	12040672.97	4536782.23	4224237.36	4248933.6	4752146.72	4933441.52	3634385.08	3530046.61	9589798.9	3560393.77	1939220.51	1891478.7	1352213.3	1612799.38	856981.39	834.05	1089.59	2347120.62	691.36	1.2873267969062343	0.0008996939279450944	0.24175138834496984	-2.048403919962281	down
MW7856	Isovaleryl-L-carnitine	C12H23NO4	246.1609	245.1627	0.8019	4.3279	2-search-DB	31023242	--	C20826	--	1	-	-	20248.81	8569.54	4388.1	20839.46	13665.63	21734.12	23091.25	12746.05	9277.95	21588.02	12690.5	8092.61	3903.76	4202.29	6449.97	2123.76	8024.43	4199.04	13246.63	3384.55	1.1685112986090815	0.002440655366727076	0.424706976858567	-1.2354602861865542	down
MW5523	(E)-4-(Trimethylammonio)but-2-enoate;Crotono-betaine;Crotonobetaine	C7H13NO2	182.0578	143.0946	0.8014	0.8211	2-MetDNA	--	--	C04114	--	1	-	-	2359.1	2391.13	14381.01	1308.51	467.91	2740.83	1881.96	3530.61	5730.05	7286.93	16492.48	11688.07	36502.89	41443.76	35558.36	28841.89	28909.42	26126.97	33907.77	31888.81	1.5591636879039783	3.4234816475417614e-06	6.92428687267753	2.7916654966883505	up
MW2977	Trp Thr Lys	C21H31N5O5	432.2238	433.2325	0.8	5.4745	1	--	--	--	16885.0	1	-	-	1325156.16	321791.71	266297.09	1142746.2	1247295.03	1203336.94	1211329.66	493069.89	835603.69	45076.42	1456405.79	430865.78	710359.29	1129403.21	2441823.08	3914959.91	2577984.01	2787225.78	2240560.52	1931961.16	1.108639978549108	0.008103496563596123	2.4248973348661518	1.2779236678709565	up
MW1404	Gln-Ile	C11H21N3O4	294.1187	259.1532	0.7956	0.8529	1	--	HMDB0028800	--	--	1	-	-	227278.81	167827.41	231550.17	209093.03	221675.48	213895.01	210339.95	137144.08	139195.03	158916.3	60230.77	27013.92	63135.69	86313.82	24124.99	43617.8	11993.89	63869.93	36074.97	37492.97	1.6531483633665425	2.189732588977049e-08	0.236770376397492	-2.0784395058879763	down
MW2971	Trp Gln Val	C21H29N5O5	430.208	431.2169	0.7943	5.382999999999999	1	--	--	--	22571.0	1	-	-	347319.1	96318.13	149230.08	326185.5	335542.07	319769.05	303494.25	423546.35	514404.5	14864.71	721294.02	244978.72	236203.33	344129.17	752000.04	933698.37	786051.81	960460.27	686985.41	545894.26	1.1848218488023572	0.003621237859394057	2.1944229432813405	1.133841611141872	up
MW6909	cis-11-Hexadecenal	C16H30O	261.2175	238.2297	0.794	0.8962	1	53939-28-9	--	--	34527.0	1	-	-	117033.13	157419.45	702092.61	108866.48	112524.83	111275.65	116955.32	106581.9	100878.54	65198.63	423189.52	126968.8	2322728.12	2732860.28	946902.13	805070.05	916626.81	768005.0	2749651.76	1886258.06	1.1785452526564115	0.003469844493186771	8.051593383983747	3.0092743161089106	up
MW8814	Phytyl phosphate	C20H41O4P	770.5795	376.2742	0.7935	4.9155	1	--	--	C20764	--	1	-	-	1141.7	2115.55	5834.57	2980.2	2804.05	1798.98	1238.86	29015.62	4584.85	1595.92	176161.26	5875.32	116590.1	121096.01	84187.9	130832.48	98137.07	129871.75	197483.32	136794.18	1.5283656613201864	5.817050347372494e-05	22.53855448001612	4.494323085491273	up
MW8535	Ornithine	C5H12N2O2	133.097	132.0899	0.7924	0.9833	2-search-DB	--	HMDB0000214	C00077	--	1	-	-	480507.44	372118.48	638074.06	472240.93	502454.8	464378.54	485956.47	286149.37	351774.85	306994.92	160170.86	44600.77	74555.74	169887.35	246427.93	56961.44	76316.7	50646.73	70584.78	76469.23	1.5860921716262233	4.521302959404173e-07	0.23542856293442466	-2.0866387315882	down
MW1228	Dimethylglycine	C4H9NO2	156.0647	103.0633	0.7832	4.5307	2-MetDNA	1118-68-9	HMDB0000092	C01026	277.0	1	-	-	16243.54	1062.64	8678.77	16968.29	13952.84	16204.05	16957.11	2578.24	2236.88	939.66	422.07	223.81	687.17	234.43	1143.23	662.19	203.66	667.74	515.4	367.71	1.212357566953629	0.0032011919008700773	0.053509725635088885	-4.224055058067956	down
MW215	2-Methylguanosine	C11H15N5O5	296.0998	297.1073	0.7785	3.9207	2-search-DB	2140-77-4	HMDB0005862	--	58332.0	1	-	-	403185.12	194106.82	267970.8	438116.95	421187.57	431016.74	438906.86	387849.65	364893.18	119911.23	1107310.81	643724.59	1315077.52	1372928.57	1111187.63	1317032.33	1136386.16	1207360.84	1001041.11	1177617.91	1.6618905370181865	4.9649743664702526e-08	3.285027806106241	1.715905582286357	up
MW7606	Gly Val Arg	C13H26N6O4	678.4342	330.2016	0.7774	10.8414	1	--	--	--	21366.0	1	-	-	78894.75	119011.11	18071.33	58752.06	52111.15	62356.51	77333.41	111658.6	44164.2	40360.74	74730.44	245558.34	150678.43	146297.3	191730.12	203341.46	137693.75	151838.65	3224.65	131726.74	1.079160609012202	0.006046274254734476	2.168084850375696	1.1164212192475111	up
MW1036	Cocaine	C17H21NO4	322.1404	303.1471	0.7732	4.2581	2-MetDNA	--	HMDB0015043	C01416	--	1	-	-	651671.17	225949.38	504601.68	713536.85	378371.08	684739.23	697409.41	164971.77	237960.22	416049.84	13876.56	7459.16	7812.44	6294.09	4762.0	4203.2	6369.94	2252.46	17179.49	3268.98	1.5185900446464262	7.655202241588356e-05	0.015716411514795057	-5.991584341185829	down
MW9594	Tridecanal	C13H26O	221.1859	198.1984	0.7704	1.3630000000000002	1	--	HMDB0030928	--	--	1	-	-	46009561.3	28976808.21	5177719.82	48665044.31	48666851.52	39199712.27	57326998.24	33139982.36	9637726.08	29616740.08	22222671.61	9830136.99	17204165.02	9930266.4	10391720.53	13340347.34	8395330.47	12412813.75	28077082.8	20611509.42	1.0993677398529529	0.005907033538109001	0.4399783523600787	-1.184495552298916	down
MW1122	D(-)-Fructose	C6H12O6	201.0373	180.0634	0.7646	1.2246	2-search-DB	--	--	C02336	--	1	-	-	96605.3	162570.62	91737.57	120494.88	146518.01	97743.36	94303.2	132005.08	263086.92	147269.62	297701.9	159122.3	194280.2	245916.89	772795.76	250970.39	492042.0	334466.72	294273.3	203751.47	1.0907389864085832	0.009855976054312977	2.3997914613673705	1.2629090430326224	up
MW5601	1-Myristoyl-2-palmitoyl-sn-glycero-3-phosphocholine	C38H76NO8P	705.5186	705.5309	0.764	10.686	2-search-DB	69525800	HMDB0007869	--	--	1	-	-	30057.82	61895.28	33999.03	54787.58	27752.15	44009.51	47556.06	39660.01	33543.52	34440.85	54679.27	171348.1	56741.16	73150.21	81194.53	174099.64	102274.71	142129.34	103387.42	154414.94	1.309136311214908	0.0008110136290420862	2.7309648686622214	1.4494107552848945	up
MW2645	Tetrahydrodeoxycorticosterone	C21H34O3	369.2281	334.2508	0.7616	6.5421	2-MetDNA	--	HMDB0000879	C13713	--	1	-	-	1516375.32	257733.35	331441.21	2024744.27	1404587.26	2081827.23	2168576.39	2173504.91	2276418.93	26652.87	12424557.41	790810.69	2568812.83	3105087.05	2505108.16	12142518.46	3656103.14	9852420.96	6342230.51	5212124.91	1.1249735968673338	0.008802000215176587	4.108844636717113	2.0387327804750703	up
MW6213	7-Methylguanosine	C11H15N5O5	298.115	297.1073	0.7606	1.6785	2-search-DB	20244-86-4	HMDB0001107	C20674	64620.0	1	-	-	1287449.27	549246.02	1221726.15	1216232.72	1171155.83	1171052.37	1310017.01	1373895.27	1243694.85	305383.4	2147176.94	1542219.43	4000616.58	4582141.1	3048660.18	4856305.46	3055188.23	4764265.23	3377794.1	5210440.56	1.484843337895433	6.658352980631587e-05	3.3719174057852133	1.7535691982837194	up
MW5849	2-Pentadecenal	C15H28O	247.2014	224.21400000000003	0.7605	0.8326	1	64462-00-6	--	--	265104.0	1	-	-	53671.63	71578.71	80787.32	54447.17	52559.21	52883.89	50509.83	42989.69	43658.88	47031.47	125925.71	43867.54	179913.47	196613.38	99352.74	134325.37	96558.98	123268.74	165004.25	90654.31	1.327666804627269	0.0008052264194750197	2.2822102647832883	1.1904317162478282	up
MW8958	PS(18:2(9Z,12Z)/20:5(5Z,8Z,11Z,14Z,17Z))	C44H72NO10P	630.481	805.4894	0.7587	4.7868	1	--	HMDB0112434	--	--	1	-	-	106729.25	255243.5	558940.66	87598.16	59598.76	71660.16	70723.04	371434.41	274946.15	141103.25	3885463.61	1573016.44	3938121.0	2599749.56	2046123.27	2237166.78	1770101.64	1967681.47	5880594.11	3183966.32	1.4768454784768044	0.00011801942592262132	14.555712728954171	3.8635135784808363	up
MW8389	N,N-Dimethylguanosine	C12H17N5O5	312.1308	311.123	0.7571	3.2223	2-search-DB	2140672	HMDB0004824	--	--	1	-	-	175635.86	305815.55	245420.94	155390.87	160014.6	183936.25	189967.53	333187.44	313865.27	214176.98	2424630.85	307333.16	1295211.38	2223986.07	1867891.05	3563610.14	1910522.47	3041619.31	1866595.12	2116257.18	1.5153830765652991	0.00010679510856839346	9.053110793176053	3.1784136103989984	up
MW5766	2-(3,5-Dichlorophenylcarbamoyl)-1,2-dimethylcyclopropane-1-carboxylic acid	C13H13Cl2NO3	415.9044	301.0272	0.7518	4.1131	1	71937-45-6	--	C15249	--	1	-	-	208877.61	127276.55	9446.44	183326.89	175833.43	208211.5	199524.08	348937.67	334897.0	155370.57	13074.05	11363.67	22261.6	30498.41	11555.82	22592.73	5550.81	7982.65	7524.07	14273.4	1.4127694021285464	0.00022778868255554302	0.07515349655834196	-3.7340159618801914	down
MW8426	Narbonolide	C20H32O5	196.0936	352.225	0.75	6.7955	1	--	--	C11997	--	1	-	-	40740.27	5491.7	18449.26	32419.1	34274.43	36533.38	34178.92	28578.21	25961.61	680.67	83431.52	4409.02	35093.54	69078.88	49789.93	118225.98	47491.76	153333.47	104743.85	104524.07	1.1607502593590266	0.005308680100324631	2.9930020320041137	1.5815932583085373	up
MW1773	Lancerin;4-C-Glucosyl-1,3,7-trihydroxyxanthone	C19H18O10	441.0571	406.09	0.75	2.342	1	81991-99-3	--	C10075	--	1	-	-	46375.67	69003.33	10464.16	44130.1	29701.32	26285.46	32635.56	42386.58	39543.24	44992.07	33831.81	67759.34	61494.95	91933.31	139992.58	58798.54	163492.34	60726.64	72091.41	80630.15	1.10279210900501	0.006424078872531701	2.1548985235403983	1.1076199328725929	up
MW8320	N-Acetyl-D-fucosamine;2-Acetamido-2,6-dideoxy-D-galactose	C8H15NO5	190.0773	205.095	0.75	4.1407	1	--	--	C15480	--	1	-	-	24873.17	34285.7	25012.41	21016.45	17931.27	27692.77	31846.31	30794.04	15160.51	37349.97	18353.99	8961.85	4750.26	6987.31	3807.75	7714.52	6190.93	8853.41	20852.06	14958.05	1.437072155000611	2.8913189350803546e-05	0.38136989937682975	-1.390737115246884	down
MW329	3-Oxostearoyl-CoA;3-Oxooctadecanoyl-CoA;beta-Ketostearoyl-CoA;3-Ketostearoyl-CoA	C39H68N7O18P3S	1063.3792	1047.3554	0.7490000000000001	1.5269	1	--	HMDB06498	C16216	--	1	-	-	12144.73	31977.15	1818.11	2881.58	5990.41	12275.81	6434.89	4225.48	3334.2	52797.75	242022.34	85440.39	40967.84	81529.32	122241.62	38791.72	123660.51	38858.39	87584.15	43294.46	1.181118030824917	0.003525502536596032	6.755228539922769	2.7560045790011154	up
MW887	Cefpodoxime	C15H17N5O6S2	380.0524	427.06199999999995	0.7486	3.9124	1	--	HMDB0015486	C08114	--	1	-	-	47646.44	11986.19	36829.58	43832.72	44677.48	43824.3	41392.04	33362.14	32122.46	5648.42	106964.68	83333.87	158224.79	162070.75	128588.95	173666.84	128683.27	164721.84	114394.28	161456.33	1.6392547539388491	2.367201498273889e-07	4.049274677088427	2.0176635096067668	up
MW1155	DEPMPO-biotin	C24H42N5O8PS	590.2387	591.2492	0.7482	4.6434	1	936224-52-1	--	--	64809.0	1	-	-	39918.75	3640.17	21995.41	41964.67	43291.78	44760.79	44841.77	43743.76	44159.31	970.58	2040.79	1444.78	8985.9	3457.13	16343.6	12949.18	15205.89	5868.85	11751.4	5914.31	1.2191971468644585	0.0014958669706542135	0.2549807084695329	-1.9715399962274227	down
MW2596	STS-135	C24H31FN2O	353.2013	382.24199999999996	0.7474	13.2247	1	1354631-26-7	--	--	85218.0	1	-	-	106399.83	145170.7	115155.99	92160.23	146630.79	127157.7	182019.96	198802.62	381663.36	242630.71	29932.3	53883.22	19922.05	37565.68	23989.89	25204.53	28030.48	35341.01	29781.73	33150.16	1.3660113219022938	0.0005396743732656144	0.18230091406399648	-2.4556062997621604	down
MW9029	Rifampicin;Rifampin	C43H58N4O12	809.4038	822.4051	0.747	4.1131	1	13292-46-1	HMDB15179	C06688	--	1	-	-	79896.53	72158.59	74154.52	73814.97	51630.11	61589.26	67563.12	70184.88	51629.27	98615.71	7316.65	4999.26	4431.51	9911.69	4207.04	2525.33	3268.66	3196.78	743.7	2891.46	1.7172931580221078	5.7874960680115583e-08	0.06202194476457715	-4.011077425865099	down
MW5580	1-Guanidino-1-deoxy-scyllo-inositol 4-phosphate;N-Amidino-scyllo-inosamine 4-phosphate	C7H16N3O8P	620.1656	301.0675	0.7468	4.053	1	--	--	C01294	--	1	-	-	119245.66	96369.61	2413.87	98524.37	90671.47	97661.95	101995.85	85010.73	87238.26	127597.42	80404.74	29055.98	84797.76	40409.83	13654.17	13511.45	4289.35	7823.71	23247.05	39150.93	1.2327217768846808	0.0007455451690725924	0.3709431368366999	-1.4307300468315494	down
MW8061	Loganate	C16H24O10	200.0627	376.1369	0.7467	4.6475	1	22255-40-9	--	C01512	44647.0	1	-	-	6542.34	3924.96	944.55	5490.5	5799.19	10028.04	6576.28	3658.58	6758.66	1755.51	7037.96	5949.82	21222.21	14447.75	18361.32	27680.27	19608.66	21802.13	16186.85	14728.13	1.4005219634424435	0.00026987499404547465	3.244553417429102	1.6980199183482696	up
MW1670	Isoswertisin 2''-rhamnoside;7-O-Methylvitexin 2''-O-beta-L-rhamnoside;2''-O-Rhamnosylisoswertisin	C28H32O14	611.1748	592.1792	0.7461	0.8494	1	64821-00-7	HMDB37417	C12629	--	1	-	-	126635.63	131647.0	119667.96	88543.81	126578.94	58935.15	113210.94	48973.82	52691.71	531967.21	562561.69	737581.22	239243.59	299643.59	811631.06	383671.29	854869.82	260299.18	397504.74	355556.68	1.208784212455876	0.0010710268409427628	3.5047040460322547	1.809292621311836	up
MW1490	Glycineamideribotide	C7H15N2O8P	308.0376	286.0566	0.7458	2.475	2-MetDNA	--	HMDB0002022	C03838	--	1	-	-	2525.32	14979.93	503.01	3667.22	3540.49	4021.18	2882.31	18004.89	12230.27	17545.2	33583.79	25529.97	21082.14	19737.0	59763.25	36620.44	56820.31	34247.22	37321.49	24356.35	1.429931858513665	9.723305192548391e-05	4.368745261253404	2.127218985607977	up
MW9040	Ro 48-8071	C23H27BrFNO2	448.1287	447.1209	0.7455	4.7172	1	161582-11-2	--	--	44928.0	1	-	-	18783.42	1674.42	59201.29	18970.99	1901.61	19626.87	22343.75	30133.22	2945.4	44993.16	132316.23	152447.39	161854.35	145042.45	196184.06	129600.09	209475.0	120522.19	216916.54	90990.62	1.6146733458509686	4.803616115087781e-07	7.051365996547282	2.817902764681344	up
MW7391	Estramustine	C23H31Cl2NO3	231.5803	439.1681	0.7444	0.9193	1	--	HMDB0015327	C11228	--	1	-	-	9147.4	9302.46	38097.03	7313.54	12858.84	5068.56	7856.97	10821.84	11720.49	5874.06	10376.43	29002.37	36349.29	38692.97	45805.59	18750.76	42446.52	25916.19	18662.98	45563.92	1.1714348116183633	0.0012021740242516214	2.639029980978508	1.4000077406464928	up
MW8429	NCGC00179816-02!3-(3-methylbut-2-enyl)purin-6-amine	C10H13N5	72.0809	203.1171	0.7441	1.7204	1	--	--	C08435	--	1	-	-	1452192.68	1445754.51	1355261.97	2107969.5	1436740.94	1615449.38	1531062.35	1117847.51	935192.22	1953562.23	717129.73	536771.25	711151.42	836882.74	685674.96	708486.86	699530.01	442474.84	845168.0	585118.34	1.5289606853233972	1.9369474433118616e-05	0.4527037040661957	-1.1433609839807142	down
MW776	Biotin sulfoxide	C10H16N2O4S	215.0857	260.0831	0.7438	4.4525	1	--	--	C20386	--	1	-	-	21232.15	12662.03	14518.6	27903.52	20861.74	23264.29	22448.87	4868.89	3438.13	22803.47	485.18	531.35	702.15	223.35	150.28	175.76	580.95	194.15	433.51	372.02	1.5035042922593609	0.0001058068548474874	0.02211875068569736	-5.498586288399624	down
MW7857	Isradipine	C19H21N3O5	372.1567	371.1481	0.7425	4.2518	1	--	HMDB0014415	D00349	--	1	-	-	35475.73	14185.47	15271.33	32770.49	28106.01	32866.86	30971.97	1080.94	1122.29	16214.76	1668.91	3139.55	1669.67	390.57	172.75	3033.4	1027.97	1982.46	171.54	192.73	1.3235518821516543	0.0010774417313970533	0.06464083365915167	-3.9514103854324136	down
MW7441	Fenpiclonil	C11H6Cl2N2	236.9928	235.9908	0.7422	0.7765	1	74738-17-3	--	C14268	--	1	-	-	686318.56	808468.71	651041.86	322130.13	324866.04	304630.89	327556.51	786638.72	800365.18	728718.72	1106404.91	2734902.52	1460928.37	3029238.57	871062.92	2453181.42	853193.56	2297936.46	1460836.78	1521491.19	1.2957078600990464	0.0008155567525070016	3.09876273828977	1.6316922969064978	up
MW2683	TG(20:0/a-25:0/i-24:0)[rac]	C72H140O6	868.2774	852.2629	0.7418	1.5268	1	--	HMDB0064657	--	--	1	-	-	7745.6	54815.68	2593.25	9695.45	7434.84	7449.16	23763.0	8414.04	16598.8	114598.71	183222.86	156440.11	65965.09	88078.06	173890.61	59155.65	177892.88	58276.17	82510.62	58277.03	1.2236708263369858	0.0008730097919684434	4.360615898642373	2.1245319173792367	up
MW1206	Dihydrolipoamide	C8H17NOS2	178.0726	207.0752	0.7404	4.1617	1	--	HMDB0000985	C00579	--	1	-	-	14109.41	15592.87	1729.73	14907.2	14434.49	14157.38	14491.14	14616.81	15446.56	16129.31	28867.41	23689.68	202.72	31241.06	28026.37	54274.47	27574.02	45238.24	32468.49	33166.24	1.1869048270693692	0.004071399548743228	2.2471623693266745	1.168104370605628	up
MW213	2-Methylacetophenone	C20H38O7S	393.2317	422.2338	0.7397	13.2058	1	--	HMDB0032386	C07874	--	1	-	-	55739.82	48525.69	108405.37	34896.54	92877.56	60762.29	129213.17	162328.35	37619.22	30611.76	17895.79	9409.34	12923.86	8174.33	4691.7	34718.11	4845.39	21414.15	5798.52	67495.99	1.1773830665137697	0.0029465709138673433	0.246218345594128	-2.021989834642484	down
MW7983	Laserpitin	C25H38O7	451.27	450.2618	0.7390000000000001	4.7103	1	7067-12-1	--	C09697	--	1	-	-	32456.01	620.64	125989.04	3355.01	27944.21	1689.48	4176.21	57072.74	22018.12	47213.46	72258.03	291811.57	238660.12	114995.23	537880.27	250703.4	313571.28	339349.93	239493.91	191703.8	1.3917910231841637	0.0002717509617043377	8.031463817933265	3.0056629579055687	up
MW6984	CL(i-14:0/i-17:0/a-17:0/18:2(9Z,11Z))[rac]	C75H142O17P2	284.5703	529.1647	0.7381	1.4457	1	--	HMDB0092834	--	--	1	-	-	1126.43	5380.96	2349.37	1306.77	3623.63	914.31	569.61	2920.79	2036.92	4977.96	1881.64	16586.76	5633.47	11164.23	22512.35	6274.39	25174.21	11785.56	13071.65	12772.45	1.2546226392800064	0.0015888781621489704	5.032648397750601	2.3313178085360566	up
MW8293	Mycinamicin I	C37H61NO12	750.3829	711.4194	0.7361	4.0883	1	73665-15-3	--	C18845	--	1	-	-	56590.23	66370.49	39836.74	55905.34	53238.95	79971.37	67964.7	53822.16	28721.58	104229.38	20114.89	865.92	6046.84	907.74	617.18	529.84	261.04	377.08	8970.7	247.49	1.5912080943729288	6.30669223216192e-06	0.06418636720483778	-3.9615892795689613	down
MW647	Arg Tyr Val Lys	C26H44N8O6	580.3611	564.3384	0.7356	10.3764	1	--	--	--	223427.0	1	-	-	52918.15	48870.75	87962.1	54370.07	37985.72	51275.02	59806.25	40645.75	33256.28	32363.14	128842.81	143744.02	105809.51	164875.66	79985.13	259582.09	88264.31	187534.53	3109.45	170475.73	1.1563462052595483	0.00434105372764181	2.667363348516136	1.415414362345666	up
MW8584	PA(18:4(6Z,9Z,12Z,15Z)/18:4(6Z,9Z,12Z,15Z))	C39H61O8P	336.7009	688.4104	0.7355	4.2417	1	--	HMDB0115038	--	--	1	-	-	69107.5	66932.83	134877.12	69880.59	40176.49	63950.68	53462.2	28305.77	1056.26	31136.66	1613.96	12604.37	1290.16	3177.64	3134.9	3479.49	3015.93	5876.66	1251.46	727.19	1.32681040141643	0.0011993182632727352	0.0647211659048239	-3.949618592668808	down
MW245	2,3-Bis(4-hydroxyphenyl)-1,2-propanediol	C15H16O4	313.0979	260.1049	0.7355	4.0278	2-MetDNA	139755-03-6	--	C13634	--	1	-	-	6354.71	30817.17	23824.28	10101.88	9583.94	11763.29	14831.18	14850.17	16892.48	6502.49	87498.15	95613.68	68605.5	60422.35	46363.54	104355.74	40331.36	81693.53	33101.39	68663.11	1.50119267958424	3.1373664855786805e-05	4.718532487172522	2.2383382361388042	up
MW9485	Thioetheramide-PC	C40H83N2O5PS	717.5543	734.576	0.7354	11.0957	2-search-DB	116457-99-9	--	C04873	63018.0	1	-	-	61955.09	22174.82	21059.03	21565.99	11241.12	19146.66	35068.94	24310.17	25809.96	20645.87	975598.97	692742.6	1454915.44	965985.62	1053085.58	992720.32	973775.82	49426.79	106521.15	542980.67	1.3980620553517007	0.000414383064326672	29.68979668044033	4.891895308483914	up
MW8942	PS(14:0/18:4(6Z,9Z,12Z,15Z))	C38H66NO10P	672.3801	727.4424	0.7353	4.9254	1	--	HMDB0112293	--	--	1	-	-	2858.4	5657.16	12908.88	4556.2	1262.76	5408.53	815.03	5478.41	6541.82	1727.58	166879.67	37105.48	59579.56	68107.67	75755.94	81333.06	86681.01	135655.12	175024.52	89226.06	1.4942644425658795	0.0001271276951563809	20.657690167716588	4.368607043675123	up
MW85	1-Palmitoyl-2-hydroxy-sn-glycero-3-phosphoethanolamine	C21H44NO7P	452.2777	453.2855	0.7342	9.4957	2-search-DB	53862354	HMDB0011503	--	--	1	-	-	500396.63	621280.69	71885.35	523168.87	382964.71	870670.16	997207.66	596391.5	385367.21	782282.31	762091.66	54351.28	57555.85	92275.27	53023.33	75711.61	54693.94	67576.98	94344.22	51541.69	1.2189648537284936	0.0009286917941382547	0.2378327589335732	-2.071980650215901	down
MW7155	Deoxyadenosine	C10H13N5O3	299.1179	251.1018	0.732	2.6051	2-MetDNA	--	HMDB0000101	C00559	--	1	-	-	18434.19	3335.03	9341.88	14771.44	13284.18	17070.32	21389.12	17508.73	14378.25	1197.88	81624.8	49821.77	151498.53	136739.18	65708.93	135419.72	99221.74	119931.51	76097.87	77191.07	1.5698386609907775	1.923421501631005e-05	7.5988628961812115	2.9257835479276624	up
MW8756	Phe Gly Phe Gly	C22H26N4O5	143.0731	426.1903	0.7316	4.1388	1	59005-83-3	--	--	65366.0	1	-	-	133399.43	152136.92	111667.46	112404.06	104015.54	119935.06	141310.79	125918.68	120353.64	144065.61	153616.24	59270.03	46829.74	63922.85	15480.13	31559.29	24122.8	25208.8	50133.07	15468.01	1.4198798035247882	0.00012455548152860466	0.3838193173720425	-1.3815007716408831	down
MW1889	Mascaroside	C26H36O11	559.2039	524.2258	0.7287	0.7967	1	55465-97-9	HMDB35603	C09132	--	1	-	-	930405.55	1841435.41	559552.2	954632.46	956601.44	935036.53	948904.28	898612.47	965542.26	1975904.97	2537309.51	3624693.71	2033700.77	2751116.49	2521640.32	1698068.67	2741349.02	1539048.05	1842477.11	1721238.29	1.3061056761738792	0.00018848891722112937	2.0982423076851147	1.069181291790377	up
MW6905	Cimicifugoside	C37H54O11	197.1286	674.3666	0.7282	4.7978	1	66176-93-0	--	C08935	--	1	-	-	143747.9	53673.76	88915.43	89105.27	76107.92	78666.27	88207.64	26545.74	26222.18	57586.15	7640.13	6614.25	5031.42	5429.82	4423.31	9098.89	7183.42	7415.2	3627.76	8581.98	1.4589683620110876	0.0001828241609380338	0.08925373267857907	-3.4859436844507097	down
MW2515	SC-19220	C16H14ClN3O3	330.0689	331.0724	0.7275	2.3255	1	19395-87-0	--	--	45606.0	1	-	-	57987.38	65447.35	24020.36	52115.72	32759.64	35274.93	47407.41	55629.6	50466.13	54505.79	75520.45	60828.85	116581.31	80982.58	170491.21	65906.55	192864.55	70257.1	110730.48	82706.5	1.1808022606984527	0.003992637701560769	2.159038444406772	1.11038893259673	up
MW6280	Acetylcarnitine	C9H17NO4	407.2391	203.1158	0.7269	1.0017	2-search-DB	5080-50-2	--	--	956.0	1	-	-	840722.15	1582823.7	857775.01	842195.41	787579.63	1062610.38	903355.22	1103614.06	935647.77	900104.02	9052697.27	10851199.99	7713991.5	3195458.92	10633714.08	2677248.49	5421720.32	2634399.11	1661967.82	1429591.29	1.1795504721867935	0.003880243963734538	5.630560571509756	2.493278562354812	up
MW431	5,7-Dihydroxy-4H-1-benzopyran-4-one	C9H6O4	148.9795	178.0266	0.7261	1.0997	1	--	HMDB0032950	C09001	--	1	-	-	14382.64	12728.78	18514.25	9668.82	8231.99	12076.64	16894.58	15556.42	19312.92	4896.78	40689.12	2651.73	21006.29	23944.2	24913.41	26938.92	35493.72	27872.67	48490.03	22464.62	1.1502963339275387	0.005626585931922181	2.0751306744353823	1.0532021882301443	up
MW6944	CL(i-14:0/a-15:0/i-13:0/i-20:0)[rac]	C71H138O17P2	372.1025	742.1832	0.7252	12.957	1	--	HMDB0091681	--	--	1	-	-	109112.91	40969.01	26452.64	94410.58	220549.23	110777.2	58555.06	93612.81	73778.71	34589.56	98756.74	93731.36	104860.23	170775.53	339888.15	277488.16	308255.15	315623.42	113610.36	87491.4	1.0171625547947103	0.01568153387847305	2.2142598841635293	1.146824558881158	up
MW3025	UDP-N-acetylmuramoyl-L-alanine;UDP-N-acetyl-alpha-D-muramoyl-L-alanine	C23H36N4O20P2	587.0784	750.1398	0.7217	2.3418	1	--	--	C01212	--	1	-	-	48825.7	72997.7	5459.49	26216.73	31003.31	42152.93	40094.97	61559.52	62184.02	36954.46	85279.09	74488.3	89084.74	91832.52	173615.06	63911.51	182012.57	68638.94	114526.23	58986.75	1.205846846690937	0.00248026364671088	2.34501919212178	1.229599730103386	up
MW5511	(3S)-3,6-Diaminohexanoate	C6H14N2O2	231.0766	146.1055	0.7216	1.4787	2-MetDNA	--	HMDB0012114	C01142	--	1	-	-	1469.36	3720.94	14210.23	5510.42	5990.95	6900.74	6268.39	6835.09	13953.87	690.82	15690.4	15769.96	30408.43	29532.92	27761.56	31094.29	27893.08	34663.81	23489.57	34208.06	1.5724825117678276	6.795373716247904e-07	4.126754192663675	2.045007507744894	up
MW7620	Glycerophosphorylcholine	[C8H21NO6P]+	261.1182	258.1101	0.7206	1.4574	2-MetDNA	29207-20-3	--	C00670	--	1	-	-	38832.15	88923.54	26593.94	59908.22	53340.98	47633.85	34637.06	40921.7	62443.67	50059.22	143352.74	126050.59	109130.58	145037.23	172129.99	101976.14	134543.37	110901.09	110757.48	97410.19	1.5793686522378187	3.895676645145826e-07	2.4861980861179185	1.3139412467021885	up
MW2959	TRIPTOPHENOLIDE	C20H24O3	311.1684	312.1725	0.7198	13.2306	2-search-DB	74285-86-2	--	--	44381.0	1	-	-	7818363.36	6800014.8	6618478.95	6549307.76	6161081.04	6872472.2	7168543.74	7074162.94	7253248.2	9568380.32	3301357.33	5714294.9	2241782.88	2124559.32	2606500.5	2941220.19	4265114.58	2371381.13	2573812.09	3332883.75	1.6155051175967183	7.87995817567544e-08	0.4378287703709901	-1.1915613356453802	down
MW268	2,5-Diaminohexanoate	C6H14N2O2	131.0825	146.1055	0.7197	0.7302	1	--	METPA0560	C05161	--	1	-	-	479411.36	330134.65	589716.93	480654.79	461905.53	494019.69	502648.94	269951.2	248285.31	444408.45	110003.33	82739.14	75470.6	83288.44	89415.63	80432.96	83913.25	56713.34	82408.81	65714.71	1.6457634559116678	3.0130698931962228e-06	0.18834560216329785	-2.408545747884374	down
MW8317	N-Acetyl-4-O-acetylneuraminate	C13H21NO10	374.1058	351.1165	0.7197	1.1156	1	--	HMDB00796	C04015	--	1	-	-	2340.12	1047.52	1707.69	1419.73	2405.97	1386.06	1434.26	4107.3	2794.58	399.63	20842.38	2402.74	10109.77	9999.25	11471.32	4415.01	13134.17	6848.1	42741.09	8247.4	1.0483717092157134	0.014293238743255662	6.837797998830007	2.7735318035272605	up
MW7119	D-Tryptophan	C11H12N2O2	205.09799999999998	204.0899	0.7195	4.1295	2-search-DB	153-94-6	HMDB0013609	C00525	65364.0	1	-	-	2947377.46	3748872.11	2755231.4	2789923.68	2620386.13	3056339.64	3492927.69	3350628.52	2874761.26	4212774.63	3414856.04	1555418.58	1461100.46	1578667.55	1198036.32	1522565.48	1144070.1	1326551.32	1562514.01	1091877.5	1.455882823638221	1.4449337678267633e-05	0.4978349895368184	-1.006260463489098	down
MW1916	Met Asp Met	C14H25N3O6S2	430.0883	395.1185	0.7186	1.1035	1	--	--	--	18832.0	1	-	-	14833.57	21575.11	28337.87	11358.97	9138.04	16149.6	15654.22	13590.91	9557.14	19339.34	23962.8	57997.54	40246.88	72125.54	83967.27	57568.2	88401.32	62644.98	43671.3	42269.66	1.4590115646591026	8.725750306198872e-05	3.5907877010133906	1.8443003587254336	up
MW718	Avermectin A2a;Avermectin A1a, 22,23-dihydro-23-hydroxy-, (23S)-	C49H76O15	925.487	904.5184	0.7179	13.3019	1	65195-53-1	--	C11976	--	1	-	-	84795.08	93872.82	88306.48	76325.47	73773.34	83902.29	89895.71	71385.3	69312.09	68277.29	22247.86	29220.62	27923.24	23222.37	30577.58	25261.44	31074.55	22220.65	27403.38	29217.46	1.7254918602525438	1.991931146938216e-09	0.3355260807935409	-1.5755031819072467	down
MW2768	TG(a-25:0/20:0/i-15:0)[rac]	C63H122O6	189.1282	234.1256	0.7142	5.3842	1	--	HMDB0069566	--	--	1	-	-	23777.75	3943.25	12446.31	25448.8	32008.28	24677.04	26833.99	70817.42	54204.81	363.78	148128.26	17052.72	20652.15	31321.46	76957.89	127858.64	65507.1	125131.35	83469.43	49881.52	1.0585720221160742	0.012776633492460351	2.7173125245632006	1.4421805028834942	up
MW5628	1-Palmitoyl-sn-glycero-3-phosphocholine	C24H50NO7P	496.3399	495.3325	0.7133	9.6031	2-search-DB	17364168	HMDB0010382	--	--	1	-	-	312936.4	130858.12	204342.54	293672.71	263560.04	339920.47	335448.2	112157.4	137797.1	48742.92	123512.0	81229.15	83854.9	64308.84	53719.26	157006.89	91053.3	139644.91	75673.28	93727.43	1.1131009413953483	0.0052505005253089855	0.4421923856535537	-1.1772539120544288	down
MW7012	Condurango glycoside C	C53H80O17	495.2769	988.5396	0.7111	4.359	1	--	--	C17769	--	1	-	-	134543.78	79009.12	112370.03	138019.49	134232.75	137375.75	133457.34	154841.88	165316.46	108969.89	23767.5	42924.29	34805.39	47969.91	17751.48	19514.51	14860.49	25443.64	58822.59	7624.83	1.6431469067737885	1.1404641001080682e-08	0.2260814885497903	-2.145085225180673	down
MW8649	PE-NMe(20:4(5Z,8Z,11Z,14Z)/24:1(15Z))	C50H90NO8P	470.7779	863.6404	0.7109	4.7971	1	--	HMDB0113449	--	--	1	-	-	29832.41	1928.91	2976.98	25902.95	24966.46	26935.81	24814.74	23543.47	26037.69	34267.43	57311.51	171127.32	45655.5	76706.68	193284.65	156967.77	136189.24	130462.58	96144.67	49386.08	1.3816925994470008	0.00046471634812397843	5.032556631948784	2.3312915020541083	up
MW1410	Gln Glu Gln	C15H25N5O8	402.1644	403.1703	0.7093	0.802	1	--	--	--	17495.0	1	-	-	127954.31	192126.91	53988.5	139175.64	127640.33	130321.55	139209.94	129026.07	125960.47	198742.86	446234.46	966099.86	346361.47	328110.01	438019.97	462768.58	462598.03	438821.66	194634.69	248335.04	1.2582004526988708	0.0014605139494379932	3.1755999197681533	1.667029164960719	up
MW284	21-Hydroxypregnenolone	C21H32O3	367.2123	332.2351	0.7084	6.4715	2-MetDNA	1164-98-3	HMDB04026	C05485	--	1	-	-	1524858.37	170782.59	517032.67	1029648.65	1172672.19	1404108.29	1448980.51	2432291.78	1877461.89	10299.24	2005814.77	433130.67	1745896.24	1905275.08	2003686.89	4691167.05	1982290.85	4268532.7	3280124.48	2284082.18	1.029629098645435	0.014138899788835875	2.1228608749401148	1.0860098250299581	up
MW7625	Glycocholic Acid	C26H43NO6	466.3163	465.309	0.7077	6.4666	2-MetDNA	475-31-0	HMDB0000138	C01921	202.0	1	-	-	1716.7	1178.22	1022.25	1615.79	1526.82	2268.16	2708.78	167.16	291.03	820.24	1807.92	8739.04	160.63	156.18	18898.1	13667.69	18247.9	13121.16	5709.72	20569.34	1.1298520193816797	0.006603621130857732	7.591178469637967	2.924323869873501	up
MW6041	4-(Dimethylamino)cinnamaldehyde	C11H13NO	176.1032	175.0997	0.7073	0.8299	1	6203-18-5	--	--	85013.0	1	-	-	399718.88	161579.0	430950.03	363498.41	414045.15	363824.97	356926.07	106103.03	109428.22	197698.23	1308.48	3305.07	1852.13	673.53	5817.27	5997.4	4601.93	6077.37	7518.03	4913.23	1.5203607471738982	6.923097787454462e-05	0.014486137391248825	-6.109183226305941	down
MW1731	L-Glutamine	C5H10N2O3	145.0616	146.0691	0.7062	0.8242	2-search-DB	56-85-9	HMDB0000641	C00064	18.0	1	-	-	1647896.73	2232680.6	969319.34	1468670.72	1794956.33	1580042.9	1607499.57	1271263.83	1275126.51	2011198.36	5560705.04	11897152.78	3835357.69	4484784.87	8918978.55	6640348.5	9091843.46	8158271.33	3231274.39	3387733.97	1.381200620264923	0.00044638139326703204	4.111726437853015	2.0397442820703224	up
MW2230	PGB3	C20H28O4	287.2012	332.1987	0.7057	5.382999999999999	1	36614-32-1	--	--	36190.0	1	-	-	31056.43	5754.7	16123.84	25931.49	28597.02	21213.37	30898.95	57192.31	56506.04	639.15	117014.12	16000.69	23457.17	29653.93	65498.18	106332.03	60153.34	101126.0	72701.39	47939.41	1.05632202528532	0.01254037204088135	2.336053999568476	1.2240736235369498	up
MW2957	Trimethaphan	C22H25N2OS	350.1452	365.1688	0.7047	0.9213	1	--	HMDB0015248	C07174	--	1	-	-	8238.3	3266.59	7642.09	7167.44	7271.63	7647.52	7354.7	1171.71	1673.51	275.51	337.25	818.49	744.94	209.46	203.64	183.65	527.04	1031.75	1247.4	852.65	1.2946089406421812	0.0013726600925041106	0.11905606374132165	-3.070286993332025	down
MW9179	Stearoyl-L-carnitine	C25H49NO4	428.3736	427.3662	0.7041	10.1681	2-search-DB	25597095	HMDB0000848	--	--	1	-	-	272890.44	474084.06	413746.11	257279.95	267838.68	375669.84	313405.96	275943.4	327244.76	696212.18	241415.99	31203.71	61650.63	55456.03	297182.93	200288.5	254503.18	168720.03	117615.87	26760.71	1.240610592620655	0.0006890281509411022	0.3959370466451359	-1.3366570325440998	down
MW7581	Glucohirsutin;8-Methylsulfinyloctyl glucosinolate	C16H31NO10S3	516.0923	493.111	0.7018	4.834	1	--	--	C17271	--	1	-	-	7147.8	849.93	15730.44	4529.35	7295.19	5939.18	658.9	4435.51	9898.11	10674.77	38238.34	26973.63	82410.15	48353.02	41598.42	51060.93	36962.05	27339.6	35275.21	61020.5	1.5037099064492316	3.49969904587039e-05	6.6890609742406015	2.74180369623418	up
MW1625	Imidazoleacetic acid riboside	C10H14N2O6	239.0687	258.0852	0.7016	1.6785	1	--	HMDB0002331	C05131	--	1	-	-	34125.35	2387.92	31334.71	34138.55	24331.07	28628.69	35726.5	562.89	1125.83	21501.49	7354.73	551.38	469.23	379.41	2397.67	3323.65	773.37	3468.29	2964.55	3041.21	1.2480375876102958	0.0025347792135943675	0.11560433548580168	-3.1127325909365	down
MW7588	Glutathionylspermidine;N1-(gamma-L-Glutamyl-L-cysteinyl-glycyl)-spermidine	C17H34N6O5S	267.0669	434.2311	0.7008	4.0965	1	33932-35-3	--	C05730	--	1	-	-	15624.91	6936.12	9191.68	11500.64	11889.01	15884.36	12726.01	1632.37	1775.47	10664.6	109.81	2406.62	388.96	146.45	337.62	158.59	272.42	500.84	92.97	222.22	1.4500082550707831	0.0002218194607833248	0.047395777589755266	-4.3990976522052	down
MW818	Caftaric acid	C13H12O9	347.0226	312.0481	0.6986	1.0958	1	--	HMDB0013680	--	--	1	-	-	65048.08	40964.76	22451.77	68486.99	64102.6	65484.79	63588.8	34845.46	38356.16	59430.37	1483.01	1622.36	9901.97	5974.21	2407.64	8139.8	3189.85	7726.51	16878.89	5965.23	1.5838889620685042	5.1303119357341595e-06	0.1210679788716722	-3.0461107561289626	down
MW5770	2-(S-Glutathionyl)acetyl glutathione	C22H34N6O13S2	627.1757	654.1625	0.6967	4.7185	1	--	HMDB0060343	C14863	--	1	-	-	3895.43	5212.98	49154.64	16486.3	1092.96	12079.24	12084.14	1343.77	5891.71	3149.29	141160.9	157426.54	194877.9	136019.53	169505.87	125246.21	196792.75	137021.71	249244.37	102086.78	1.645445442730521	4.804762791279882e-07	14.57900039550519	3.8658199000195803	up
MW3089	zinniol	C15H22O4	265.1475	266.1518	0.6947	13.2118	2-search-DB	--	--	C10840	--	1	-	-	1965987.78	4093023.27	1705755.9	1065944.64	2664829.91	1369050.5	3231784.8	2898527.29	6968430.67	3694971.96	924314.01	1514332.58	476626.53	633836.07	505019.44	496355.76	511420.94	566096.8	466109.26	582353.59	1.2295489908327502	0.0021634969834833373	0.22511281722964124	-2.151279893149887	down
MW8399	N2,N2-Dimethylguanosine	C12H17N5O5	312.1309	311.123	0.693	4.2509	1	--	HMDB0004824	--	--	1	-	-	13044.57	911.33	206871.2	7502.12	8171.4	11457.73	7246.05	18090.64	18799.36	4163.89	361081.25	15483.99	100030.53	366761.09	136372.19	1316620.38	310161.3	793136.24	880731.24	183003.3	1.092371087740985	0.011674544272038468	15.0658451110347	3.913209697345252	up
MW6972	CL(i-14:0/i-15:0/i-16:0/i-21:0)	C75H146O17P2	220.5751	439.1301	0.6917	4.6512	1	--	HMDB0091837	--	--	1	-	-	2326.47	1197.43	6340.56	2391.42	1940.72	1046.89	1635.79	3117.93	4111.81	2897.04	749.07	4081.2	7488.51	5148.39	12641.92	14809.62	12350.7	18075.48	11091.4	9728.82	1.2369097566083964	0.002373233551799152	3.560871522910043	1.8322303838603964	up
MW2614	Suxibuzone	C24H26N2O6	423.1615	438.1791	0.6917	1.5435	1	--	HMDB0042019	D01289	--	1	-	-	35098.59	55308.11	14001.46	40797.32	25582.1	36262.29	42143.86	17339.94	14223.69	83112.26	374.75	496.87	16629.82	3502.32	1088.57	5448.17	6518.06	6623.4	4434.73	327.31	1.3254562545085389	0.0009675433308489117	0.12489088811536395	-3.0012598713467113	down
MW8513	Oleana-1,9(11)-dien-28-oic acid, 2-cyano-3,12-dioxo-	C31H41NO4	492.2654	491.3036	0.6913	4.9088	2-search-DB	218600443	--	D09584	--	1	-	-	67295.05	3162.37	57006.98	41785.4	54839.95	44810.34	19986.08	13171.03	20870.22	3633.44	56456.94	92934.25	98158.0	15928.83	144682.46	169606.05	146085.06	164822.54	101786.16	196923.45	1.3017508411882068	0.000722522175306641	3.636025885037172	1.8623624701815893	up
MW1463	Glucosisymbrin;1-Methyl-2-hydroxyetyl glucosinolate	C10H19NO10S2	376.0335	377.045	0.6912	1.0124	1	--	--	C17275	--	1	-	-	73816.26	95722.03	136592.77	73910.59	73703.25	67624.78	66539.19	54194.23	52071.03	55473.7	132933.41	144957.33	150038.3	278313.28	233857.53	242168.62	241542.3	188789.08	147933.53	225007.14	1.5031255948737108	1.3068323738837085e-05	2.6486310511964	1.4052468932808209	up
MW1147	DELTALINE	C27H41NO8	506.2867	507.2832	0.6906	4.6434	1	3836-11-9	--	C08679	44191.0	1	-	-	581619.06	62632.34	134647.99	590566.54	551090.65	574543.11	605658.97	591864.54	530717.37	62516.62	148896.77	25002.89	81263.14	50385.39	103302.12	77142.12	105534.75	72382.32	109867.63	51846.88	1.2682860738097324	0.0012352814183124654	0.1926391789083388	-2.3760269469056827	down
MW9069	Saccharopine	C11H20N2O6	300.1199	276.1321	0.6893	1.6864	2-MetDNA	997-68-2	HMDB0000279	C00449	383.0	1	-	-	50928.5	10231.14	19155.68	19092.8	16784.43	22700.47	28171.47	43398.85	55888.26	8263.05	73134.1	43220.56	93401.13	110675.55	79995.03	109394.91	73339.23	103140.81	100886.12	112720.52	1.5414484237803576	2.022037077583133e-06	3.2769845308689827	1.7123688625995377	up
MW1190	Diclofop-methyl	C16H14Cl2O4	374.9972	340.0269	0.6866	4.5225	1	51338273	--	C11021	--	1	-	-	4405.83	27.41	2960.74	4599.36	5088.61	4577.58	4867.58	424.63	641.85	116.97	53.67	94.03	75.13	49.33	105.66	58.49	16.76	148.42	29.41	45.6	1.1974299229760517	0.003730455931604447	0.024413075737191887	-5.3562021219699885	down
MW5607	1-O-(cis-9-Octadecenyl)-2-O-acetyl-sn-glycero-3-phosphocholine	C28H56NO7P	594.3405	549.3794	0.6851	9.6885	2-search-DB	86288-90-1	--	--	43412.0	1	-	-	1396.08	2112.72	2078.99	1205.15	1081.29	1666.95	936.01	2124.38	1396.33	1169.95	4205.79	17679.87	9538.01	10998.79	7299.86	14622.7	7882.49	12063.1	78.73	12789.37	1.3345997690174471	0.0006697315694062173	6.4055690160438035	2.679326732965344	up
MW2125	ostruthin	C19H22O3	297.1526	298.1569	0.6846	13.232999999999999	2-search-DB	--	--	C09281	--	1	-	-	708567.01	657281.85	793282.35	699914.11	661364.68	703052.23	723940.31	658376.08	675607.54	1019706.51	348570.44	330802.09	230043.55	266365.3	276126.53	374087.97	301851.17	347976.5	366879.35	414180.61	1.6585995064702628	8.579169817595088e-08	0.44608165615846096	-1.1646202722933634	down
MW5634	1-Stearoyl-2-hydroxy-sn-glycero-3-phosphocholine	C26H54NO7P	524.3711	523.3638	0.6824	11.0002	2-search-DB	19420576	HMDB0010384	--	--	1	-	-	270059.77	63495.77	181798.22	197134.81	210772.79	323399.28	279238.73	104837.93	161526.69	46648.98	140406.96	32790.48	49399.2	33169.54	61325.21	111705.84	63760.24	53401.75	33691.28	45977.5	1.1795707641588036	0.0023579015753944256	0.34021620936199065	-1.5554762160581217	down
MW2209	Pentacarboxylporphyrin I	C37H38N4O10	245.043	246.0528	0.6816	0.841	1	--	HMDB0000789	--	--	1	-	-	24769.48	121738.15	85182.45	31584.72	69552.16	15615.82	32510.23	21047.93	30815.78	53017.46	111538.94	138912.48	79803.92	320023.95	141920.09	102174.56	138969.38	110303.16	219558.55	72229.96	1.1528363874094962	0.0029907811932066808	2.954578020838304	1.5629520963195531	up
MW9289	TG(20:0/i-12:0/14:0)	C49H94O6	459.0806	486.0985	0.6806	4.7858	1	--	HMDB0064366	--	--	1	-	-	6687.21	13897.14	90586.72	3579.75	841.37	2178.35	1721.22	58317.85	5197.72	3894.49	583659.69	151209.55	525039.37	418498.91	181702.66	244714.56	199746.29	293174.73	994427.87	354769.66	1.310482999248137	0.0011797463440024515	21.117735985663487	4.4003832677779915	up
MW8048	Levothyroxine sodium anhydrous	C15H10I4NO4.Na	560.7621	798.6686	0.6802	4.7887	1	55-03-8	--	C08212	--	1	-	-	135407.12	308441.18	594063.95	92675.09	66765.61	76258.79	68596.62	439948.23	267410.06	166185.78	5243827.39	1548586.34	4874317.05	3136564.04	2050248.5	2603833.69	2187450.74	1951314.83	8072495.89	3818521.12	1.3766619477501738	0.0005532075893228907	16.01585046665164	4.001428504391988	up
MW8638	PE-NMe(14:0/20:3(5Z,8Z,11Z))	C40H74NO8P	582.4742	727.5152	0.6797	4.9632	1	--	HMDB0112985	--	--	1	-	-	592.38	5150.6	2894.09	2579.5	799.36	3290.72	915.28	5983.22	5091.95	1572.45	55802.38	87145.48	159669.19	12794.56	77717.88	42057.25	70463.1	117287.34	56840.23	114911.52	1.4098459197176687	0.00028754420907321066	27.52689009700532	4.78276972279897	up
MW161	19(R)-hydroxy-PGF1	C20H36O6	371.2346	372.2512	0.6793	5.4744	2-search-DB	81371-59-7	--	--	36115.0	1	-	-	276165.78	81356.08	42827.64	257709.29	286306.43	272982.2	288135.76	122762.39	219952.19	179701.23	629979.51	83874.21	149247.56	270392.58	375670.7	890122.84	399478.65	701154.7	489930.3	375117.64	1.0253634328758914	0.017299509054870182	2.1524586340466594	1.1059855121730169	up
MW6726	Calycanthine	C22H26N4	231.82	346.2157	0.6775	3.8118	1	--	--	C10573	--	1	-	-	76042.89	95317.98	215224.37	62388.23	42185.99	68548.3	59052.52	38930.9	31117.25	93486.45	193.57	266.56	11357.77	3030.69	300.45	647.09	246.6	766.25	12348.97	10050.54	1.3095068058122183	0.0015706321846612773	0.050119834607635416	-4.318474535911796	down
MW8209	Met Val His Leu Thr	C26H45N7O7S	586.3023	599.3101	0.6773	4.0545	1	--	--	--	264054.0	1	-	-	47104.46	31220.69	2162.32	59805.06	83060.16	61693.36	44841.19	65933.52	65534.05	45313.29	46238.57	21580.96	29503.01	21652.17	15043.5	6814.53	7746.06	5295.81	18663.68	19624.05	1.1816379479395989	0.001623801932703656	0.37926670339024704	-1.3987153748827752	down
MW2295	Pindone	C14H14O3	229.0825	230.0943	0.6753	1.5867	1	83-26-1	--	C19141	72882.0	1	-	-	117887.3	29406.53	154999.53	103721.03	153833.08	103697.38	105316.17	28486.99	23523.82	130390.72	1252.0	941.23	364.83	598.1	614.01	645.95	1472.66	922.97	1203.59	656.36	1.4611176514903563	0.00022755606423041465	0.009115990112298649	-6.777384924883957	down
MW1897	Melampodinin	C25H30O12	521.1645	522.1737	0.6749	0.8497	1	60295-53-6	--	C09501	--	1	-	-	25469.98	13928.48	17448.59	23469.85	26938.39	22287.73	34647.51	13233.48	16466.44	11314.72	11481.11	2365.96	9506.8	4506.49	5338.98	8987.37	3695.95	7242.81	19286.68	8692.67	1.2743315646931987	0.00041805589076405764	0.3952377028317561	-1.3392075186784955	down
MW9112	Ser Glu Lys Arg	C20H38N8O8	260.1486	518.2813	0.6727	2.4723	1	--	--	--	224853.0	1	-	-	160628.21	148891.72	524948.42	153039.02	158345.65	170768.46	139208.15	75584.19	50382.14	133051.05	7081.44	8634.4	5032.85	5299.8	5003.52	9239.64	2856.89	2813.57	4891.15	5272.86	1.245305259225003	0.0029716375606810377	0.03272952028531105	-4.933263732734996	down
MW5517	(6Z,9Z,12Z,15Z)-Octadecatetraenoyl-CoA;Stearidonoyl-CoA	C39H62N7O17P3S	998.2887	1025.3136	0.6695	11.6896	1	--	HMDB06519	C16163	--	1	-	-	2380511.08	3169753.37	6400205.1	13172308.84	2248765.7	8442973.06	12810105.01	8345190.71	12691530.81	2690284.07	29410448.66	7925430.71	26184127.52	30303432.46	17316738.2	24125367.19	6653693.72	17558897.78	6702869.35	5492307.95	1.0127842956536832	0.013571082518056887	2.3727636665368594	1.246568411490641	up
MW9518	Thr Trp Asp	C19H24N4O7	421.1732	420.1645	0.6683	4.5592	1	--	--	--	18424.0	1	-	-	32685.07	1312.98	5857.99	44201.87	38243.64	37178.22	43783.46	9744.06	5910.3	2279.13	127.91	2866.97	137.02	91.51	100.8	89.09	1460.57	1906.97	291.62	3469.13	1.1457637747756657	0.0056346001330603935	0.047657080991074366	-4.391165600996613	down
MW2395	Proteacin	C20H27NO12	458.1396	473.1533	0.6678	1.1625	1	22660-96-4	--	C08339	--	1	-	-	7471.02	18419.0	17007.63	4044.94	7613.37	5577.94	7265.78	16818.9	18762.2	15441.63	50778.34	15556.83	24074.51	18022.46	57149.32	26010.78	33848.67	24131.84	37712.4	15125.32	1.1976807157624567	0.003032495699387314	2.55365914272476	1.3525659698651136	up
MW9050	Ryanodine;Ryania	C25H35NO9	1004.4874	493.2312	0.6674	4.3772	1	15662-33-6	--	C08705	--	1	-	-	8400.32	95918.96	100127.39	8929.73	5738.01	3960.04	45505.78	133519.05	64189.96	27341.08	111220.52	176972.63	121945.11	197932.69	63598.05	349443.44	78705.0	294489.21	139009.29	87189.8	1.1202566450075462	0.0050032705057009175	3.2828326671667982	1.7149412146074743	up
MW5732	16alpha,17-Dihydroxypregn-4-ene-3,20-dione cyclic acetal with 2-furyl methyl ketone	C27H34O5	425.2388	438.2406	0.6666	4.2371	1	7148-96-1	--	C14880	--	1	-	-	1385.81	84748.32	15567.92	3561.16	1754.25	13102.93	1515.73	28765.36	46110.06	46627.46	29960.5	77241.41	44350.09	102821.2	126345.43	45406.7	111343.69	63429.41	112110.68	27651.99	1.1197902548920189	0.0034204056182695693	3.0462455632374894	1.6070322447094094	up
MW9441	TG(i-22:0/13:0/16:0)	C54H104O6	659.0032	694.0112	0.6654	1.1106	1	--	HMDB0067782	--	--	1	-	-	166125.42	98488.85	33850.68	165945.82	133125.39	174250.48	177491.76	276873.42	262583.61	44338.3	27826.58	16099.2	45587.06	34187.03	15976.48	55714.05	16507.57	32907.61	38525.07	86683.67	1.250155415993666	0.0012045264619393744	0.24135454985586374	-2.050774071118642	down
MW6219	7-XYLOTAXOL	C52H59NO18	504.6872	985.3732	0.6626	4.7864	1	90332-66-4	--	--	85010.0	1	-	-	86327.67	192442.28	359037.35	55998.11	45677.34	39232.23	52059.58	222320.62	209862.54	98023.64	2722243.33	927644.57	2268509.81	2000378.15	1243034.68	1564744.03	1068463.07	1128468.88	3485375.5	1799928.49	1.4864689408390137	0.00010330155563446684	13.379162305352954	3.741915883830361	up
MW9540	TOLTERODINE	C22H31NO	348.2276	325.2406	0.6612	3.8328	1	124937-51-5	HMDB0015170	C07750	43895.0	1	-	-	27863.34	46134.61	114100.81	33467.9	20483.08	25046.89	32762.03	15662.88	6954.65	31784.11	373.39	287.24	291.52	1739.93	223.64	359.63	499.61	972.67	132.57	336.42	1.1968822541047162	0.004760352372047588	0.014725386954169013	-6.08555064403643	down
MW6193	6-O-Methylguanine	C6H7N5O	166.0627	165.0651	0.6586	1.4614	2-search-DB	20535-83-5	--	--	64619.0	1	-	-	358939.1	417681.43	201027.99	352937.48	299705.48	437709.95	327709.33	317639.47	343077.7	346387.15	515640.38	1802874.97	601476.71	673128.07	716858.91	877191.97	595225.75	539888.18	618856.27	576247.79	1.0698184909531372	0.0079570468111116	2.2091676518607652	1.1435029077516825	up
MW7801	Indoleacrylic acid	C11H9NO2	170.0619	187.0633	0.6557	4.1424	1	--	HMDB0000734	--	--	1	-	-	37411.92	70026.24	42330.37	68263.31	68799.2	43580.23	73586.22	65301.62	70322.38	78119.39	70715.29	21244.85	19102.04	24110.36	15194.85	18162.1	7106.95	15010.33	20031.06	8169.39	1.3921788264664003	4.267891964260672e-05	0.3542702564868298	-1.4970777488785911	down
MW6143	5-Hydroxyisourate	C5H4N4O4	207.0144	184.0233	0.652	0.7398	1	--	HMDB0030097	C11821	--	1	-	-	21602.8	14259.21	9272.11	18538.89	19761.45	29755.61	18270.88	12880.47	15336.47	12803.36	41068.08	52483.09	48134.65	23716.93	37343.16	49604.36	38474.11	49506.06	25643.37	30782.71	1.4535486640277824	3.3489639848621255e-05	2.300287828387144	1.2018143927375835	up
MW2936	Traumatin	C12H20O3	195.1136	212.1412	0.6515	4.436	1	--	HMDB0037326	C16309	--	1	-	-	3473.0	11913.92	406.29	1813.53	5069.39	2976.79	5232.34	11668.07	7374.71	5319.09	27399.32	16032.88	22535.38	13297.65	14375.53	17454.0	15127.48	15045.36	11781.62	13882.73	1.443257995091942	2.1319634351712242e-05	3.0215497167002163	1.5952886803949418	up
MW487	Ac-Tyr-OEt	C13H17NO4	384.1007	251.1158	0.6514	4.1477	1	840-97-1	--	C01657	44264.0	1	-	-	53143.43	51237.69	17530.51	61245.48	47596.12	59335.13	65995.87	30988.15	27920.34	57804.44	46509.67	10201.42	18831.9	15339.94	7507.99	13032.01	10440.38	17984.72	17270.92	21296.02	1.3278073560073542	0.00022624264699864184	0.3773604942973854	-1.405984699146987	down
MW9728	Val Ser His	C14H23N5O5	383.2037	341.1699	0.6499	1.909	1	--	--	--	16886.0	1	-	-	7608.48	12266.04	11763.41	8143.49	8164.42	6621.47	12146.02	24280.57	13363.26	18575.6	12127.92	945.56	5557.5	2499.12	3191.28	3132.54	1134.33	1416.14	3685.33	2308.32	1.2598873957716925	0.0006808574761799155	0.29282707066855085	-1.7718791638269116	down
MW5918	25-Hydroxycholecalciferol (25-hydroxyvitamin D3)	C27H44O2	464.3499	400.3341	0.6499	13.3171	1	19356-17-3	--	--	218.0	1	-	-	29842.6	30525.92	13882.3	12854.87	22241.1	11362.4	18428.38	13569.42	11591.41	14392.44	2925.56	4071.65	3319.98	2981.62	4347.94	4791.28	5109.42	3719.05	3226.76	6109.07	1.4343712375578743	0.0001855166386611586	0.22722110433864434	-2.1378312560364385	down
MW7055	cycloguanil	C11H14ClN5	541.1507	251.0938	0.6498	4.0584	1	--	HMDB0060974	--	--	1	-	-	63054.83	65036.82	1405.17	66478.79	48450.18	61963.33	65504.0	84723.21	55434.19	105987.85	63043.45	18921.1	35460.24	20983.39	5425.61	4151.54	3323.33	9192.11	4991.33	18104.94	1.2577758050107632	0.0006414418424146304	0.2970641450627086	-1.7511536090738593	down
MW2086	Nocardicin D	C23H23N3O9	506.1181	485.1434	0.6498	4.2219999999999995	1	61425-17-0	--	C17353	--	1	-	-	7442.17	9614.23	489.62	10825.91	8299.71	2230.69	4173.85	32545.9	21532.32	4150.83	29251.86	38773.04	29369.0	34024.67	30305.12	26193.49	28424.91	27415.64	27455.66	30140.89	1.4589892252643168	7.184341778727646e-05	2.974715915456685	1.5727518980234834	up
MW2015	N-acetyl-S-farnesyl-L-Cysteine	C20H33NO3S	404.1667	367.2181	0.6498	1.6112	1	135304-07-3	--	--	43436.0	1	-	-	30464.9	45529.1	40658.22	33301.11	39167.77	30424.51	30689.95	27048.08	22210.2	124684.38	656.23	5865.5	8672.35	17262.35	13122.86	6442.66	19594.84	8268.12	20386.05	774.57	1.1260325339245965	0.0074015689186683956	0.23821480037329595	-2.0696650437263657	down
MW6324	Ala Asn His Asp	C17H25N7O8	519.1923	455.1765	0.6498	4.7779	1	--	--	--	108002.0	1	-	-	19986.84	74107.18	132479.3	54199.8	21960.76	17216.63	84286.83	528836.38	399441.11	29205.84	1531636.77	452767.51	1899914.19	832489.04	666258.96	785021.37	700334.68	790205.8	2042105.89	932412.95	1.3695294823874398	0.00039549594159348	7.808611115523419	2.9650659651490425	up
MW5731	16,17-Didehydropregnenolone	C21H30O2	361.2374	314.2246	0.6498	6.263999999999999	1	--	--	C06392	--	1	-	-	18652.07	1178.32	12563.08	22610.74	17032.31	17020.62	25206.49	44674.17	39842.39	1601.39	139538.09	2606.24	35269.89	31819.39	45864.95	90140.2	118588.21	78127.96	73233.49	69891.31	1.1742915289965283	0.004911261609144967	3.4188757769052427	1.7735220041405406	up
MW5702	13-Deoxycarminomycin	C26H29NO9	517.2181	499.1842	0.6498	0.789	1	76034-18-9	--	C12428	--	1	-	-	9657.54	43234.62	21817.3	9481.64	9656.62	9873.53	5856.57	1530.93	3861.22	48956.75	46243.48	152365.31	31737.24	80646.28	249829.78	42108.71	192159.2	45746.17	44268.06	44895.8	1.030895673468133	0.012066126584569785	5.673266871929116	2.5041797303499114	up
MW1085	Cyflumetofen	C24H24F3NO4	466.1646	447.1657	0.6497	4.6852	1	400882-07-7	--	C18517	--	1	-	-	2173.44	4622.5	894.59	1473.56	1159.88	4711.9	6083.4	5733.27	14435.74	4848.71	15799.7	8646.21	13954.18	7114.33	15496.74	18820.34	12161.52	17782.04	20857.68	12030.56	1.4064520795456816	6.689187453770593e-05	3.092167477765672	1.6286184605300922	up
MW8283	Morfamquat;Morfamquat dichloride	C26H36N4O4.2Cl	605.1647	538.2114	0.6496	4.0681	1	4636-83-3	--	C11194	--	1	-	-	34763.89	44852.91	10310.34	36240.47	31158.33	33852.98	42230.88	43879.84	36877.68	42642.21	5789.85	2492.02	3481.89	5722.69	2948.85	2786.79	876.27	1689.57	316.32	1936.92	1.6314172023695186	1.919238943266761e-06	0.07858862402021606	-3.669535697359732	down
MW9252	Tetraethylammonium cation	C8H20N	130.1591	130.1596	0.6495	4.46	1	66-40-0	--	C07512	--	1	-	-	51109.06	37326.72	72828.63	46210.9	150512.53	121087.83	44656.17	41383.28	44236.03	41882.24	150723.25	85762.15	57431.38	91532.36	210679.26	231648.45	105936.22	239883.78	72642.36	235375.8	1.0688137523524492	0.007640837509084429	2.275090670642671	1.1859240431046842	up
MW2213	Pentoxifylline alcohol	C13H20N4O3	299.1524	280.1535	0.6495	13.244000000000002	1	6493-06-7	--	--	1768.0	1	-	-	48371.23	40460.25	58569.51	46812.51	61245.16	46822.7	40587.69	50169.87	45609.28	68449.24	46651.6	19965.76	10583.28	13265.2	16038.28	21028.75	12704.86	13209.51	17297.94	29874.47	1.5155130941460142	2.598259308893655e-06	0.3956234722857209	-1.3378000713544589	down
MW404	5-(3'-Carboxy-3'-oxopropenyl)-4,6-dihydroxypicolinate;5-(3-Carboxy-3-oxopropenyl)-4,6-dihydroxypyridine-2-carboxylate	C10H7NO7	272.0212	253.0223	0.6495	6.5133	1	--	--	C05641	--	1	-	-	32553.46	173.81	25269.51	31690.9	30379.5	35002.44	34363.18	694.89	578.18	189.79	148.35	4915.0	5788.13	3574.53	373.2	3796.34	2993.7	94.38	255.97	4662.45	1.0704091406780392	0.01104151885373747	0.13935387530549412	-2.843174971840841	down
MW5966	3-Hydroxypropenoate	C3H4O3	130.0498	88.016	0.6495	1.4607	1	--	--	C12069	--	1	-	-	983620.64	1258612.3	1008389.46	912134.44	1069895.53	815009.86	881206.57	965770.13	950502.97	638299.42	1578720.49	3549177.83	2106046.42	4574367.78	2592523.88	2952821.23	2658192.09	2763052.6	1417053.49	1690636.64	1.3750216997971865	0.00042735005830476255	2.729240533751729	1.448499547986429	up
MW7389	Erythratidine	C19H25NO4	370.1416	331.1784	0.6494	4.2278	1	41431-22-5	--	C09424	--	1	-	-	115400.29	39176.67	23832.6	91145.97	102088.7	98117.61	104680.7	57284.68	50861.4	632.68	34069.3	18846.51	26596.59	20912.81	560.7	26339.91	16091.27	24108.57	23912.54	28562.19	1.1324810360082227	0.004655771722914678	0.322004583288021	-1.6348468716411335	down
MW6770	CAY10593	C26H27ClN4O2	526.1981	462.1823	0.6494	0.7938	1	--	--	--	45491.0	1	-	-	3858.3	21034.83	12562.51	1789.6	3159.7	1503.55	768.09	11128.58	890.66	21965.77	40107.06	145149.35	47819.54	103140.21	127171.84	44667.21	142487.58	53082.01	33892.69	59719.5	1.3300649507079028	0.0006137683011806375	10.135022569464967	3.3412773964024782	up
MW9778	Zaltoprofen	C17H14O3S	298.0659	298.0664	0.6494	1.3709	1	74711436	--	D01547	--	1	-	-	839761.54	1588141.71	276510.88	670309.79	676593.99	866954.92	677291.35	797837.63	755381.12	1021972.63	2993941.56	2841287.84	1813799.75	2823633.72	1718119.77	1860556.9	2480796.5	2017731.69	1935094.89	1962838.81	1.5429772611276875	1.0514655480469116e-06	2.747334841332593	1.4580327547860417	up
MW1845	Lys Asp Trp Ser Phe	C33H43N7O9	700.3111	681.3122	0.6494	10.6252	1	--	--	--	264073.0	1	-	-	16720.51	20991.92	22461.34	17593.71	13852.69	17676.11	17705.73	19716.32	14657.5	14538.37	34761.22	109594.6	71756.02	95812.35	46012.35	113934.79	47626.22	38800.33	2331.86	88309.05	1.2020327436851443	0.002750206870911565	3.688950579316508	1.8832104614500311	up
MW6154	5-O-Methylvisamminol	C16H18O5	357.0687	290.1154	0.6494	12.6263	1	80681421	--	C09016	--	1	-	-	5276.38	1380.47	2560.41	3423.12	4708.19	3605.79	2845.06	2384.98	2537.6	1208.66	4706.97	4782.05	8065.81	6989.66	8900.36	14532.14	11446.77	12656.96	2640.59	1808.3	1.1327638876073096	0.007490854647293512	2.556896840898263	1.35439395560236	up
MW3060	Validamine 7-phosphate	C7H16NO7P	256.0591	257.0664	0.6493	0.8584	1	--	--	C21216	--	1	-	-	10841.21	42088.84	12609.77	9581.98	14093.04	13616.54	10241.17	27518.3	18127.96	14423.33	74948.12	24510.35	88793.03	25540.1	53525.76	104150.29	72913.21	116095.27	50878.08	52839.13	1.3651044425315901	0.0005708165624450636	3.8361160373783063	1.939646360611076	up
MW8959	PS(18:2(9Z,12Z)/24:1(15Z))	C48H88NO10P	834.6007	869.6146	0.6493	4.7629	1	--	HMDB0112442	--	--	1	-	-	59044.63	14299.19	82014.96	61906.35	55647.53	72206.57	87720.19	511741.37	309867.83	13385.93	811434.25	246993.61	1026680.66	259111.9	387165.28	437802.05	434155.32	379661.74	971727.79	302937.79	1.2019685478814734	0.0021652670981694815	4.146968853309764	2.052057211617086	up
MW9661	Tyr Leu Pro Ala Val	C28H43N5O7	638.2353	561.3162	0.6493	4.2933	1	--	--	--	264946.0	1	-	-	1100.9	303621.72	350958.63	125171.72	113525.03	964.03	976.92	306165.25	322489.37	156477.93	1800168.44	1665845.38	1258944.5	1488151.04	633130.31	800909.6	621135.53	700037.19	268246.84	598046.27	1.302711711073998	0.0007383203528040972	5.848884193210449	2.5481614242751864	up
MW7260	Dihydrouracil	C4H6N2O2	132.0768	114.0429	0.6493	1.5145	1	504-07-4	HMDB0000076	C00429	285.0	1	-	-	210753.17	311974.91	162206.19	197654.42	145713.49	174248.82	130021.97	162457.44	176256.01	566404.5	622217.75	436237.06	249830.3	508200.14	868113.29	587663.25	861503.48	589875.35	838634.71	637622.62	1.3893214642304157	8.144282255014833e-05	2.7706676979321165	1.4702336905041038	up
MW1208	Dihydrothymine	C5H8N2O2	127.0513	128.0586	0.6493	4.0777	1	--	HMDB0000079	C00906	--	1	-	-	35865.82	12886.5	19564.41	42955.26	34841.31	37638.51	44324.25	10799.71	9703.02	31526.82	1974.02	1565.37	618.31	722.94	887.84	461.82	761.39	897.53	556.38	590.2	1.4878839152785974	0.00013030526193417476	0.03225854705302047	-4.954174729787293	down
MW7340	dTDP-D-galacturonate	C16H24N2O17P2	543.0411	578.055	0.6493	4.1558	1	--	--	C03034	--	1	-	-	644.38	995.18	17613.95	271.78	4210.53	490.19	2648.31	3800.71	5110.34	7691.62	4810.79	63275.78	13732.63	17646.14	29007.64	15527.0	41345.9	14903.51	28338.6	3963.24	1.0374765878938441	0.009402585913505807	5.348834636436424	2.4192246022855115	up
MW5706	13(S),14(S)-epoxy Fluprostenol isopropyl ester	C26H35F3O7	583.1868	516.2335	0.6493	0.8144	1	--	--	--	96486.0	1	-	-	10748.04	19796.99	16727.02	12657.51	14410.92	9512.62	6321.25	10128.82	11738.5	17490.56	28600.23	38997.76	44062.73	48150.69	61366.22	35812.99	63895.02	34831.87	23123.02	44542.2	1.4983054343575044	3.343380065859763e-05	3.268551232384404	1.708651310645266	up
MW2240	Phaseolic acid	C13H12O8	277.0353	296.0532	0.6492	0.9878	1	53755-04-7	HMDB29318	C10483	--	1	-	-	20200.22	4139.74	160202.4	12219.38	16255.09	12840.85	25233.27	22188.32	27955.73	13960.22	90199.2	110766.13	171091.97	95770.87	75650.74	171532.1	95154.74	186514.72	12510.61	84821.84	1.1240401200609411	0.002577792019204881	3.470905808787329	1.7953122147663183	up
MW2228	PG(20:2(11Z,14Z)/18:2(9Z,12Z))	C44H79O10P	797.5338	798.5411	0.6492	13.1473	1	--	HMDB0116577	--	--	1	-	-	2591246.0	4303498.35	5035975.33	4529961.16	1706473.55	5130377.03	3407346.9	8829898.16	7913633.94	5103361.28	820684.56	1763068.28	1767178.52	567571.9	1189042.74	533300.81	546430.51	1396961.62	769087.85	686532.03	1.396012915468141	0.0002926527759164945	0.2067866623289465	-2.2737849595847566	down
MW2182	PE-NMe(11D3/11M5)	C47H82NO10P	850.5604	851.5676	0.6492	13.4006	1	--	HMDB0113759	--	--	1	-	-	148183.2	66451.0	100039.4	90481.8	41106.47	29853.86	22950.67	19294.0	26707.74	34706.87	8957.56	5933.59	9879.31	11774.2	9727.92	13698.94	19503.58	20162.78	12653.78	18168.37	1.0828560102270128	0.008744983197516784	0.22501837393784874	-2.1518852849707035	down
MW7181	DG(15:0/14:1(9Z)/0:0)	C32H60O5	474.0513	410.0355	0.6492	0.9021	1	--	HMDB0007067	--	--	1	-	-	18266.68	19210.05	1045.5	18273.82	17954.86	19860.45	18089.59	14410.66	9777.58	23760.26	15521.54	7566.97	7984.31	5017.89	1706.55	4588.52	1307.65	4774.64	16478.38	3067.69	1.1316123025385785	0.002540181899192446	0.4233698901552418	-1.2400094256088627	down
MW8160	Mannitol 1-phosphate	C6H15O9P	542.1247	262.0454	0.6491	4.7135	1	--	HMDB0001530	C00644	--	1	-	-	14874.36	24045.53	1347.43	15086.78	12756.97	1100.78	2004.78	5735.14	4761.96	22454.14	24137.97	86458.84	90427.56	25165.82	182442.69	89032.3	111480.98	120304.83	62629.54	57240.79	1.355623109021492	0.0006901938166860265	8.153390484033128	3.027400110550992	up
MW1821	Liposidomycin B	C42H67N5O21S	1028.4038	1009.4049	0.6491	4.0371	1	--	--	C12006	--	1	-	-	118560.44	137882.76	288654.69	126524.63	127823.38	120648.21	117141.47	78258.16	58935.55	74114.97	16458.79	2544.94	27451.84	704.14	953.41	1167.08	1630.22	785.02	209.84	1447.49	1.4540347711124406	0.00019593735007097728	0.042731981323593606	-4.548539978782985	down
MW1840	LY293111	C33H33FO6	565.2008	544.2261	0.6491	0.8438	1	161172-51-6	--	D04074	45192.0	1	-	-	10211.99	17923.86	15416.89	7784.04	13644.25	7756.76	12955.11	5319.4	14836.25	9831.43	19158.42	22032.47	30351.45	29375.91	53525.62	41442.02	60385.29	51348.34	37589.45	26879.19	1.4335863323835685	0.00021574392923905401	3.2165302933143662	1.6855052760648113	up
MW5993	3-Oxopentanoic acid	C5H8O3	155.0105	116.0473	0.6491	1.6188	1	10191-25-0	HMDB03771	C02233	--	1	-	-	62546.32	109160.65	39871.43	53181.78	59263.53	60156.34	56289.46	19404.83	17472.08	140324.4	6853.24	812.22	3510.29	13694.15	11338.17	3702.71	4125.88	3034.98	22567.37	8670.97	1.3070540453789208	0.0013609307747270072	0.12678270927546811	-2.9795700918665404	down
MW2088	Nodakenin	C20H24O9	389.1241	408.142	0.6491	5.7422	1	495-31-8	--	C09279	--	1	-	-	11687.62	27309.04	8302.91	22187.69	10139.89	8907.85	14883.17	5115.66	7579.2	10334.11	15444.48	15704.64	33848.33	29534.3	38545.78	43458.43	44398.72	41862.47	63367.42	42058.89	1.351841567375259	0.00032907288528287806	2.9120742469936447	1.54204713932919	up
MW1169	DG(8:0/14:0/0:0)	C25H48O5	809.3249	790.3259	0.649	1.5364	1	--	HMDB0092913	--	--	1	-	-	17607.78	23756.87	2411.51	14994.35	16112.13	17408.93	14006.41	5911.72	7282.56	33105.4	9289.65	4888.91	5240.85	3481.28	3163.68	4236.27	616.63	4618.59	760.4	4377.69	1.202988250572323	0.0031825476113216213	0.2665437333704855	-1.907555831169906	down
MW1282	ent-Fisetinidol-(4beta->8)-catechin-(6->4beta)-ent-fisetinidol	C45H38O16	855.1907	834.216	0.649	1.1124	1	88269-47-0	--	C10225	--	1	-	-	7840.15	15456.42	18958.72	3516.02	867.21	4274.94	4959.62	10888.41	9705.33	18878.18	26049.09	43447.63	38710.88	42984.95	63802.58	34385.53	42699.55	33011.52	42411.05	30657.88	1.5513036191085539	1.046656660097822e-06	4.175999370706382	2.062121494503858	up
MW2129	Oxaloacetate 4-methyl ester	C5H6O5	145.0142	146.0215	0.649	0.9848	1	--	--	C03716	--	1	-	-	192497.79	187984.95	169521.48	155622.49	216616.95	192415.04	190009.39	129333.1	141981.42	342239.77	79951.26	61294.3	97565.17	65299.86	21769.26	142576.96	30370.01	141573.24	135334.07	146438.24	1.2595990969685211	0.000655628918153273	0.4807432024643565	-1.0566616363659649	down
MW7812	Integerrimine	C18H25NO5	688.3805	335.1733	0.649	4.9088	1	480-79-5	--	C10328	--	1	-	-	5762.2	5340.12	17054.45	4256.65	5890.33	4834.43	4277.88	19167.73	1394.86	7010.85	78255.65	18859.07	78357.42	33722.04	52698.4	42132.62	58618.19	51165.65	72463.5	40439.58	1.5298508500330823	3.0397090501333302e-05	7.023811600290707	2.8122541479809646	up
MW7649	Haplophytine	C37H40N4O7	699.3025	652.2897	0.649	0.7784	1	16625-20-0	--	C09208	--	1	-	-	29665.54	57796.03	12812.18	26653.78	22691.92	25515.07	22281.19	6564.79	9445.26	73740.72	101408.22	110371.58	53981.74	74236.97	89397.86	36635.48	87472.31	36359.05	84732.99	31091.75	1.1420940045880423	0.0019226821307210238	2.4574175579266773	1.2971430174751477	up
MW7828	Iprovalicarb	C18H28N2O3	658.4539	320.21	0.6489	8.3234	1	140923-17-7	--	C18866	72628.0	1	-	-	16655.85	2634.7	5647.26	16409.29	12932.72	12950.84	16088.54	8446.18	4497.1	4309.76	11948.97	3017.33	657.93	397.5	831.36	849.26	674.67	791.06	722.75	151.24	1.184859402202398	0.0015048584295849741	0.19928033819272592	-2.3271287198391177	down
MW5477	(-)-alpha-Bisabolol;Levomenol	C15H26O	223.2057	222.1984	0.6489	11.6265	1	23089-26-1	HMDB36197	C09621	--	1	-	-	5924.88	4388.38	6377.05	6348.03	7455.9	8389.73	8382.17	8698.4	8130.73	4953.89	16436.55	21600.67	23009.29	16831.73	18570.64	20739.27	16658.98	21215.79	20542.09	9367.78	1.6040262845032285	2.057245615953437e-06	2.678856484278737	1.4216172930259665	up
MW2462	Resveratrol 3-sulfate	C14H12O6S	289.0175	308.0355	0.6488	0.9394	1	--	HMDB0041772	--	--	1	-	-	16705.6	16471.37	1681.46	15224.43	18643.77	22483.6	21802.29	4801.28	6178.4	30426.42	700.92	157.12	1017.65	1465.68	448.06	1467.26	2406.55	849.5	5182.0	434.25	1.3562219707398095	0.0007178393444174843	0.091497968314961	-3.4501164806345725	down
MW7881	Kanokoside B;Suspensolide F	C21H34O12	496.2389	478.205	0.6488	2.4706	1	--	--	C17429	--	1	-	-	10035644.14	8425799.1	39271975.12	8810835.07	8904310.1	10042067.18	7644588.17	4073736.91	3641601.78	5325633.08	573769.88	149288.94	71201.11	73934.72	150797.42	131176.1	144312.42	114082.21	59932.5	113002.61	1.0898950899742	0.010818327369823385	0.01489503343751766	-6.069024827510762	down
MW9627	Trp Lys Phe	C26H33N5O4	556.1723	479.2533	0.6487	0.778	1	--	--	--	15988.0	1	-	-	22793.24	82282.35	28896.69	27573.12	18950.95	28109.48	27162.21	23507.14	28412.14	43156.87	201307.33	319304.46	122024.17	245384.44	267620.93	123949.04	257800.44	137152.98	124137.64	118085.1	1.4653342297915135	7.401312835356223e-05	5.793562613265173	2.5344507720277085	up
MW2533	Ser Gln Phe	C17H24N4O6	379.1623	380.1696	0.6487	4.3154	1	--	--	--	16334.0	1	-	-	17830.95	7147.18	23185.15	21183.55	20656.2	20379.98	22530.27	3726.15	3947.51	13429.65	599.06	108.43	416.36	1835.69	71.4	2219.28	430.92	2518.59	86.2	301.33	1.4541842121669677	0.0002096445646292766	0.055755422191856086	-4.1647440764203765	down
MW1912	Met-Trp-OH	C21H21N3O6S	424.0972	443.1151	0.6487	4.2193	1	--	--	--	65029.0	1	-	-	8204.56	5270.97	2857.29	14008.19	8585.38	14054.93	2376.72	12544.27	22079.72	2608.63	31349.67	53030.74	37287.31	55485.47	63020.69	67802.25	62359.59	54277.19	51693.23	64746.55	1.6558164962410369	5.2510794388163694e-08	5.8434910173445145	2.5468305212741944	up
MW7482	Furcatin	C20H28O10	505.0873	428.1682	0.6487	4.7858	1	499-33-2	--	C10458	--	1	-	-	20097.38	47573.15	102996.98	6065.97	2336.97	5350.0	13861.61	52674.6	36744.15	22672.08	713835.9	255431.12	649035.81	448911.66	268718.81	342524.17	269058.96	300191.5	1070085.33	483939.56	1.39361397123041	0.0004160327259699549	15.470851271836276	3.951480677056837	up
MW7197	DG(i-14:0/a-25:0/0:0)	C42H82O5	631.6024	666.6162	0.6487	4.78	1	--	HMDB0093423	--	--	1	-	-	3291.64	2788.3	5976.44	1086.24	2991.35	1963.65	1467.51	7632.89	2895.92	1344.52	93505.65	19674.44	108198.47	60541.97	28458.79	60370.13	39143.83	20672.01	100263.43	66218.53	1.4033960155719472	0.0004021794866877314	18.99098270080659	4.247242655503727	up
MW3042	Val-Trp-OH	C21H21N3O6	821.2788	411.14300000000003	0.6487	0.9365	1	--	--	--	65022.0	1	-	-	5774.08	6592.81	2088.93	6192.01	4455.93	3399.66	4487.01	7537.55	7743.48	1094.93	19000.53	9066.46	13745.03	10539.14	8302.04	10263.45	9525.27	7680.86	11401.46	7756.89	1.3165366488560022	0.00042583452098465276	2.1731613350702768	1.1197952838913396	up
MW2321	Pradimicinone I	C28H23NO11	530.1092	549.1271	0.6486	1.4327	1	116276-03-0	--	C06777	--	1	-	-	45208.71	21362.66	7955.65	56170.45	53335.83	52004.96	47646.84	132947.05	44203.36	17105.73	1539.04	5094.73	1075.53	962.04	331.97	1441.33	357.56	2702.74	2785.48	1105.76	1.2330026115970525	0.0021680400722383746	0.03639815639261429	-4.7799908116197525	down
MW2535	Ser Glu Glu Glu Ile	C24H39N5O13	586.2366	605.2544	0.6485	4.3663	1	--	--	--	264762.0	1	-	-	4297.66	14848.91	23002.48	6749.26	5121.89	10104.1	13651.28	21943.94	12882.71	16113.43	6539.1	712.73	680.15	483.78	5405.68	480.14	4092.32	124.56	9467.43	4061.9	1.2649723874933123	0.0009708885768430203	0.2489812816870923	-2.005890809751781	down
MW6004	3,16-DIDEOXYMEXICANOLIDE-3 -DIOL	C27H36O7	490.28	472.2461	0.6485	5.4571	1	--	--	--	43636.0	1	-	-	1549.8	365.59	1373.65	1046.86	1712.18	1627.83	907.84	555.27	550.13	78.13	11192.6	78.01	1915.64	3154.53	16431.48	13654.79	15489.98	11529.37	11268.14	3272.8	1.2742537180384392	0.0027548579431102014	9.00837694834181	3.171267197103462	up
MW1599	Ile Arg Asn Asp	C20H36N8O8	553.2142	516.2656	0.6484	4.3611	1	--	--	--	165301.0	1	-	-	35110.75	904.53	339.38	23522.27	20214.86	33596.02	26144.1	13459.2	18180.76	8227.33	5447.98	234.46	4260.55	1177.83	1869.37	763.77	3284.66	672.71	425.43	536.16	1.2164827756535626	0.0024418693178521445	0.103912093097799	-3.266564532685857	down
MW6688	Bruceine D	C20H26O9	410.1572	410.1577	0.6484	2.1555	1	21499-66-1	--	C08752	--	1	-	-	32172.07	24375.45	44913.31	30125.52	29955.76	34210.11	40622.77	17582.66	18418.13	30174.26	323.6	425.13	1247.93	1469.1	2682.63	2492.99	1381.97	713.15	362.74	1129.9	1.6614099009462682	1.997834774321083e-06	0.040420222717537896	-4.628778918710164	down
MW9278	TG(20:0/16:0/i-22:0)	C61H118O6	195.0288	212.0321	0.6484	4.3428	1	--	HMDB0063478	--	--	1	-	-	36432.93	160.83	4047.35	28999.78	30340.01	28234.81	31912.6	4402.98	2212.86	348.46	4936.07	1699.13	153.27	148.16	153.78	258.37	266.16	234.41	5191.41	97.82	1.042597734742644	0.011815803474409131	0.07863052710709349	-3.668766664113667	down
MW7339	dTDP-beta-L-rhodinose	C16H26N2O13P2	481.0771	516.091	0.6484	0.8267	1	--	--	C12447	--	1	-	-	14975.15	31011.26	34378.55	11111.84	7049.75	10571.73	10621.22	10583.29	8904.38	13424.51	11091.9	3347.59	56652.0	77973.96	57336.0	66356.98	49629.08	76462.83	33950.29	36902.0	1.179046135905925	0.0034111441394076127	3.077360021196123	1.6216932348351425	up
MW2587	stevioside; LC-ESI-QQ; MS2; CE	C38H60O18	841.3266	804.378	0.6483	0.9311	1	57817-89-7	--	C09189	--	1	-	-	3305.25	16485.14	1472.64	5269.1	3484.41	2775.07	1657.33	1870.21	888.28	9195.25	16537.2	24063.58	15537.89	19936.04	21283.95	3719.18	23241.59	3793.09	7481.62	5931.18	1.0416809730088343	0.0065147067019583815	3.0499384949317583	1.6087801495766283	up
MW2797	TG(i-20:0/22:0/a-21:0)[rac]	C66H128O6	505.2741	524.2919999999999	0.6483	4.6103	1	--	HMDB0065794	--	--	1	-	-	59343.75	7385.35	13181.34	59600.3	58594.86	60342.17	62661.29	71755.49	67653.12	15436.58	24504.83	7721.37	11447.62	2984.45	19134.25	5622.35	13716.15	2206.96	16984.05	5000.69	1.2534123116598752	0.0010751826194841548	0.2296916562883933	-2.1222296441357797	down
MW8079	Luliconazole	C14H9Cl2N3S2	706.9303	352.9615	0.6483	4.0015	1	187164-19-8	--	C13478	--	1	-	-	19300.47	7900.89	18782.16	41779.19	22109.77	23072.22	23986.03	28665.63	22120.86	9484.79	1160.44	927.88	2382.99	3617.02	1093.5	246.99	161.9	1265.16	725.66	1875.29	1.490946233393122	7.570963786778214e-05	0.06195536588266379	-4.0126269518468565	down
MW7556	Glu Ala Leu Val Lys	C25H46N6O8	603.309	558.3377	0.6483	4.073	1	--	--	--	264501.0	1	-	-	28400.61	30294.19	1984.61	32048.43	29276.6	20066.45	20299.26	26183.26	26733.99	22556.08	4246.91	2995.06	2604.68	4383.47	1524.98	3027.8	648.11	1264.74	720.27	227.17	1.5336533587917012	2.0368901545270508e-05	0.090997617424703	-3.458027417810255	down
MW1020	Clionamide	C19H18BrN3O4	412.0302	431.0481	0.6483	0.9943	1	68835-91-6	--	C17092	--	1	-	-	22684.61	18489.87	40916.04	20420.33	22249.44	22606.6	20528.22	18694.96	18835.56	30431.57	77044.38	32425.9	63197.36	54809.79	57201.28	39941.25	39344.8	38797.63	75599.96	34053.79	1.3333832020113356	0.0004149599390064453	2.1725694191230964	1.1194022755550188	up
MW6531	Asp Phe Lys	C19H28N4O6	431.1902	408.2009	0.6483	0.8526	1	--	--	--	18300.0	1	-	-	31669.16	20239.76	36857.61	29045.68	34641.43	29870.48	31418.48	13566.74	2904.44	32339.57	7836.44	4495.82	3367.59	243.38	560.68	2828.15	262.15	187.25	528.62	4858.79	1.5284305194071912	4.65525386631673e-05	0.09586192672841537	-3.382898252805587	down
MW6506	Asn Pro Met	C14H24N4O5S1	402.1805	360.1467	0.6483	1.2882	1	--	--	--	16580.0	1	-	-	21823.68	21927.14	8334.02	18153.7	22664.54	17650.72	15822.13	10925.03	12919.02	482.62	1414.25	4092.4	4541.25	583.3	4081.38	4811.05	8645.88	2491.82	2236.61	3125.03	1.310058069923542	0.0004940609058494246	0.23903350041737834	-2.064715269572187	down
MW5727	16-phenoxy tetranor PGF2 methyl amide	C23H33NO5	442.1991	403.2359	0.6483	4.5848	1	--	--	--	64705.0	1	-	-	7370.05	752.5	9297.64	4409.48	5900.43	8105.66	10614.81	5335.47	4648.76	507.66	17646.95	17180.05	12587.5	12675.53	23062.0	36239.17	15819.55	33637.36	22822.17	7205.79	1.3321319397659581	0.0007568816975410133	3.4925795267714115	1.804292966478683	up
MW893	Cercosporin	C29H26O10	571.1012	534.1526	0.6482	2.4004	1	35082-49-6	--	C10309	--	1	-	-	3720.86	4267.35	388.87	1185.6	990.3	1708.87	1969.69	5496.62	4917.84	3390.89	8979.52	8681.96	6664.83	6395.41	9428.13	3507.21	14668.81	4942.84	9526.96	5132.98	1.2765900195774136	0.0007072564415042545	2.779504074810009	1.4748274971084196	up
MW639	Arg Leu Asn Asp Phe	C29H45N9O9	698.3015	663.334	0.6481	0.9279999999999999	1	--	--	--	264434.0	1	-	-	11516.33	17502.36	15722.43	8376.94	5320.6	11091.18	8530.7	7403.92	5558.53	3061.03	56164.82	33516.89	31482.65	18520.7	29243.58	25987.07	29520.99	22554.36	7533.73	11364.38	1.1922936453292958	0.0028599067249024264	2.8260821550779824	1.4988034058702944	up
MW6292	Acrolein	C3H4O	130.0864	56.0262	0.6481	1.7181	1	--	HMDB0041822	C01471	--	1	-	-	527138.98	201088.16	66286.96	512970.13	302802.17	331584.18	552153.03	130807.94	129769.93	705526.51	73357.12	24364.83	138155.61	141183.62	154903.09	108739.52	151635.82	106579.37	117650.69	36364.9	1.126149083757564	0.006738809861230403	0.3043050930610229	-1.716409614888314	down
MW7007	Codeine-6-glucuronide	C24H29NO9	517.2180000000001	475.1842	0.6481	1.4346	1	--	HMDB0060464	C16577	--	1	-	-	74511.33	210909.23	13701.43	60511.12	65579.27	66562.8	70668.1	45808.16	42412.28	271405.79	511391.64	728137.49	212406.62	444971.6	526744.83	196968.01	407498.7	157788.07	337037.83	156028.05	1.224744996315713	0.0011744981584238554	3.9899083530047528	1.9963556085568803	up
MW7593	Gly Asp Ile Val Ile	C23H41N5O8	480.2816	515.2955	0.648	4.6691	1	--	--	--	264162.0	1	-	-	30080.77	524.8	20670.92	27169.16	27467.18	50071.9	31965.71	35016.67	37052.23	1036.52	7180.79	1270.46	2617.13	1397.69	547.61	298.69	1119.37	1093.9	1417.09	262.8	1.3308803734660408	0.0007059989867009697	0.06590746516856584	-3.9234143049404353	down
MW9747	Vat Yellow 4;C.I. Vat Yellow 4;Dibenzo[b,def]chrysene-7,14-dione	C24H12O2	297.0698	332.0837	0.648	0.7916	1	128-66-5	--	C19545	--	1	-	-	2085702.17	2115419.43	3526557.74	2004005.33	4220021.02	2030737.25	1636770.96	1914152.84	1831689.75	2136474.11	9223703.87	13863748.39	3770594.05	15148393.02	4833129.92	12406133.5	4743812.95	12107050.39	5073827.14	4714406.62	1.2654869933093142	0.0015435958851324075	3.654434313737846	1.869648102230592	up
MW5981	3-Methylthiopropyl glucosinolate	C11H21NO9S3	430.0272	407.0378	0.648	1.1114	1	26888-03-9	--	C08412	--	1	-	-	31080.08	24733.79	19967.63	50617.86	51587.65	30488.22	30160.24	50816.55	72149.2	8303.28	17900.83	1983.12	25841.75	3124.79	1666.83	7306.53	1553.09	15501.42	21539.04	19339.05	1.14541184420783	0.002120155181744048	0.31293604159992644	-1.67606026806611	down
MW6032	3beta-Fluoro-5alpha-androstan-17beta-ol	C19H31FO	317.2252	294.2359	0.648	2.5026	1	--	--	C15330	--	1	-	-	25860.53	6519.27	27203.11	35103.82	25936.07	32390.69	37918.7	80653.86	69161.1	12348.1	1509.04	2507.82	1697.24	5137.97	948.78	2952.69	1418.29	895.07	4685.48	1204.58	1.2696344513087672	0.0014502943699244515	0.06501633765959751	-3.9430538978059215	down
MW6133	5-Aminoimidazole	C3H5N3	147.0642	83.0483	0.648	4.14	1	--	HMDB0003929	C05239	--	1	-	-	27435.01	28367.56	402.96	39496.98	34808.98	36555.55	39752.58	53551.7	46923.94	41783.88	16857.9	2626.19	2537.4	6941.77	2019.84	11533.02	684.29	7762.23	24148.93	5627.43	1.353772062147803	0.00014613032342559022	0.2312913914019612	-2.112216524602076	down
MW456	7''-O-Phosphohygromycin	C20H38N3O16P	623.2183	607.1990000000001	0.648	3.8169	1	--	--	C03368	--	1	-	-	32842.89	16845.23	24533.33	52068.49	29837.97	46683.92	49798.72	4836.88	6053.32	29474.54	12865.13	131.33	135.66	4696.77	254.27	131.81	6178.43	3940.69	7632.27	6045.65	1.3141784139301982	0.001017555581979497	0.14339779303571984	-2.801905274480207	down
MW6371	alpha-Antiarin;Antiarigenin 3-O-beta-D-antiaroside	C29H42O11	633.226	566.2727	0.648	4.7853	1	23605-05-2	--	C08847	--	1	-	-	1035.35	5288.59	4053.7	2539.73	1363.93	476.48	2134.18	1778.01	1967.03	339.8	34404.44	18123.97	37857.74	37218.06	28087.93	34267.39	25233.43	32186.98	38764.84	40945.87	1.6935174300879197	1.1626556782909625e-07	15.592971759276915	3.9628240026406822	up
MW1886	Malyngamide K	C24H38ClNO3	460.2026	423.254	0.6479	4.1682	1	--	--	--	65425.0	1	-	-	12296.72	9839.79	11863.27	16318.64	12141.49	11459.71	17596.36	2425.81	3240.83	18249.81	437.99	3706.66	233.41	124.89	4283.79	130.03	3554.96	116.91	3667.91	2687.23	1.4224287630944454	0.00022332910838251	0.16411141998829964	-2.6072524600135987	down
MW8906	Proguanil	C11H16ClN5	507.2262	253.1094	0.6479	2.4775	1	--	HMDB0015263	--	--	1	-	-	104645.26	95915.91	336681.9	86970.78	96199.26	110052.28	89572.2	48006.67	44452.21	66453.47	8382.02	517.94	549.37	3988.13	700.4	307.28	4862.92	611.05	101.57	426.52	1.2385922428680645	0.0030650224206308337	0.018951018246499925	-5.721580822660173	down
MW9080	Sapanisertib	C15H15N7O	354.1051	309.1338	0.6479	4.5760000000000005	1	1224844-38-5	--	D11183	--	1	-	-	15236.16	2241.03	3967.54	13454.66	10790.05	12843.15	10368.5	3603.78	531.18	735.54	1445.93	462.88	228.34	873.84	994.27	179.21	188.73	450.03	871.47	395.02	1.1659075933761591	0.004504222082234375	0.08254830890861915	-3.598617529501593	down
MW7084	Cytochalasin A;(7S,13E,16R,21E)-7-Hydroxy-16-methyl-10-phenyl-24-oxa[14]cytochalasa-6(12),13,21-triene-1,20,23-trione	C29H35NO5	478.2588	477.2515	0.6477	4.1162	1	14110-64-6	--	C19953	--	1	-	-	47891.98	55135.05	47925.89	29073.9	32363.38	31244.28	23623.35	322.53	475.46	3027.74	842.95	4043.95	364.12	445.89	163.99	183.58	342.21	171.32	3290.47	979.9	1.224965649396396	0.002874559596184911	0.03994480521061476	-4.645848295737618	down
MW8123	Lys Val Lys	C17H35N5O4	418.2402	373.2689	0.6476	0.856	1	--	--	--	18536.0	1	-	-	692.73	3073.37	10740.81	3927.69	4547.31	3908.49	2715.2	6057.16	772.01	14542.14	14558.12	46484.79	32597.71	49435.3	46932.01	24455.12	50007.61	15504.66	56190.11	17955.99	1.410400248788738	0.00017326453647942868	6.9467023403340855	2.7963282805289222	up
MW1030	Cobalt-precorrin 5B	C43H50CoN4O16	974.2039	937.2554	0.6476	0.8715	1	--	METPA1266	C16243	--	1	-	-	2386.64	4393.53	4324.09	4270.3	4017.07	1997.25	4257.54	2909.4	2620.82	2456.13	3905.7	16111.2	14138.65	70983.69	25268.85	20168.22	23130.37	13960.52	12587.45	38712.86	1.090921498349688	0.007565850250533108	7.105198590541308	2.8288749734068532	up
MW9447	TG(i-22:0/a-25:0/i-24:0)[rac]	C74H144O6	594.1675	288.0668	0.6475	4.0655	1	--	HMDB0069398	--	--	1	-	-	19483.26	23815.89	17373.99	25139.4	28258.48	25234.01	32360.74	29057.65	20528.42	30729.02	22631.64	5334.66	13923.18	10381.47	1249.88	2645.41	3854.44	879.83	5325.9	6850.93	1.5132208791164758	3.830803363856684e-06	0.2900114715062088	-1.7858181272064753	down
MW7714	His Val Phe Gly Glu	C27H37N7O8	632.2416	587.2704	0.6475	12.4197	1	--	--	--	264605.0	1	-	-	40369.61	34495.37	40157.7	32709.9	28434.21	26874.7	28116.11	30074.78	32109.08	32825.74	6841.52	5885.39	3400.53	4278.33	10010.95	13100.3	7947.48	10714.61	21881.61	52365.78	1.2186459729222874	0.002501735266351973	0.4182716717070263	-1.2574878030295584	down
MW1451	Glu Tyr Glu	C19H25N3O9	420.1412	439.1591	0.6475	4.452	1	--	--	--	19273.0	1	-	-	12318.04	1843.39	13096.44	12412.33	13797.72	13777.45	15012.44	175.14	1005.05	12784.91	83.23	69.43	1374.0	135.07	931.35	225.75	53.83	279.13	90.13	44.35	1.3630002934196137	0.000846123779803006	0.03415267736134773	-4.871857508344796	down
MW7523	Gigantine	C13H19NO3	492.3069	237.1365	0.6473	6.4043	1	32829-58-6	--	C09445	--	1	-	-	16321.51	1127.4	2697.49	18229.89	20200.65	28601.21	30195.08	17286.75	11948.2	532.67	7816.4	233.5	2331.48	978.39	1684.83	3339.51	1907.41	1563.53	2064.45	1052.91	1.1362558842304498	0.004966328362030958	0.15612530442769632	-2.679223709949889	down
MW7211	Dialifos	C14H17ClNO4PS2	435.0363	393.0025	0.6473	4.1542	1	10311849	--	C19028	--	1	-	-	1745.31	835.56	7628.83	264.68	2636.68	218.58	1957.93	1032.59	1760.21	6149.75	2998.26	32762.98	6094.03	7078.47	22423.09	8739.81	23261.48	6855.49	15091.08	3585.96	1.0431824669992027	0.009635268686373249	5.319439193862845	2.411274156463304	up
MW8112	Lys Lys Gly Ala Glu	C22H41N7O8	578.3144	531.3017	0.6472	4.2939	1	--	--	--	264650.0	1	-	-	6090.06	19410.89	35341.12	3230.14	2654.68	5157.34	2671.5	23791.14	29248.85	19145.47	155556.76	154714.88	93891.68	135275.07	29520.08	95463.69	56014.03	66930.24	19489.88	51204.98	1.2581660988815488	0.0013175231470500595	5.847446718947829	2.5478068110180714	up
MW2925	trans-2-Enoyl-OPC4-CoA	C35H54N7O18P3S	1001.2651	985.2459	0.6471	4.1201	1	--	HMDB11120	C16336	--	1	-	-	2213.61	2039.32	1676.2	3947.07	3316.29	3832.54	2263.74	8840.11	14484.74	641.25	55239.46	10035.23	40940.96	61608.17	26724.85	31911.18	26020.56	31180.68	57222.26	33501.46	1.4807877675861083	9.004743291513371e-05	8.65532158575439	3.1135874234687493	up
MW2397	Protodeoxyviolaceinic acid;Protodeoxyviolaceinate	C21H15N3O2	681.2254	341.1164	0.6471	1.2617	1	--	--	C21131	--	1	-	-	4018.06	26851.72	8439.77	5440.07	6551.48	8085.24	5073.05	1591.44	4847.89	42967.56	39320.58	57255.42	11192.4	57298.95	83297.44	22141.33	63150.42	22791.05	70833.23	12930.47	1.1331542838748336	0.0032890099695918273	3.8660373378317088	1.950855571031953	up
MW7831	Irinotecan carboxylate;CPT-11 carboxylate form	C33H39N4O7	645.3158	603.2819	0.6471	0.8979	1	--	--	C11365	--	1	-	-	2099.46	7718.47	4891.62	937.66	904.68	1685.17	3238.39	1052.91	1106.91	4639.88	25993.27	17534.05	13249.24	9888.31	9354.04	5038.62	9817.06	2020.26	8847.41	3708.87	1.0682827959275554	0.00738846234653303	3.729463150504949	1.8989679720767043	up
MW7791	Imicyafos	C11H21N4O2PS	381.0314	304.1123	0.647	0.7326	1	140163-89-9	--	C18469	--	1	-	-	27541.0	36722.95	31895.61	23261.77	27145.47	23634.86	27647.41	19030.18	22883.63	35002.98	29170.07	98983.62	55646.48	96064.96	92880.76	81222.78	92184.72	77914.51	57374.8	70439.73	1.4742205884437358	6.043271165499389e-05	2.7364477886736003	1.4523043302379757	up
MW7302	DL-a-TOCHOPHERYL ACETATE	C31H52O3	536.4075	472.3916	0.647	4.053	1	7695-91-2	--	--	44039.0	1	-	-	304847.39	341165.44	488.6	310860.25	264503.86	313517.85	357894.23	314072.49	270104.03	474854.78	298573.7	130815.87	190677.35	103695.48	48007.68	48251.9	35190.18	41380.27	59758.14	105793.77	1.2426197568108068	0.0008124373835706236	0.35976734440107305	-1.4748638538474783	down
MW7841	Isoformosanine	C21H24N2O4	413.1449	368.1736	0.647	1.2717	1	--	--	C17593	--	1	-	-	40858.66	32489.68	13457.89	26846.38	31607.14	25139.51	24162.68	49275.75	14917.64	114399.76	431267.75	139440.09	164480.57	117374.1	290675.72	58167.21	577375.94	57310.46	228084.07	216804.81	1.1474277007667306	0.005487861361186514	6.1126882122926425	2.6118069819480416	up
MW9752	Vicianose;O-alpha-L-Arabinopyranosyl-(1-6)-D-glucopyranose	C11H20O10	335.0949	312.1056	0.6469	0.8183	1	14116-69-9	--	C01625	--	1	-	-	50486.91	15651.05	64423.82	46739.33	49073.74	43268.82	38856.83	89621.5	93847.91	5587.74	21061.21	7777.26	39686.73	10906.55	7101.67	30667.63	9827.43	32082.22	13750.67	20551.3	1.0290772962139618	0.00791935374906971	0.3887241408106176	-1.3631813892007643	down
MW1378	Gabexate	C16H23N3O4	641.3304	321.1689	0.6469	9.5538	1	--	--	D08004	--	1	-	-	7356.66	22238.44	17273.32	5305.1	6112.66	7568.44	8465.78	4099.42	6942.19	19068.37	40260.81	39532.12	24333.54	32072.18	31302.64	50201.12	30249.47	42862.16	3827.32	31708.41	1.3404048444269059	0.00023708819402103507	3.1250462748483727	1.6438775529747174	up
MW7088	D-Alanyl-D-alanine	C6H12N2O3	202.1186	160.0848	0.6469	2.1239	1	--	HMDB0003459	C00993	--	1	-	-	572652.14	388068.92	184051.09	585761.79	482257.01	558833.42	615450.01	323165.95	301367.8	314099.65	89920.88	37623.38	16334.03	15240.84	42365.75	17278.25	45606.21	21825.47	40810.3	14084.73	1.5734761570087732	1.2139578313502855e-05	0.07885179890722993	-3.664712521062865	down
MW6919	CITCO;6-(4-Chlorophenyl)imidazo[2,1-b][1,3]thiazole-5-carbaldehyde O-(3,4-dichlorobenzyl)oxime	C19H12Cl3N3OS	501.93	434.9767	0.6469	4.006	1	338404-52-7	--	C15639	--	1	-	-	8739.99	8577.45	22185.93	9117.77	5849.55	7543.21	8684.38	2352.19	2523.9	15273.85	674.04	562.28	462.49	230.04	398.84	289.62	291.94	498.3	154.11	406.23	1.3474324781384013	0.001169339440100165	0.04367603459924696	-4.517014311623549	down
MW8736	PGF2 dimethyl amide	C22H39NO4	426.2591	381.2879	0.6468	13.3016	1	68192-15-4	--	--	36145.0	1	-	-	21567.79	21013.48	13125.72	15580.79	18296.35	25947.71	13242.4	10423.99	11293.11	16094.32	409.62	2679.26	1237.03	1068.2	1247.23	2969.71	1562.2	1500.16	275.58	1727.9	1.6175119246048677	3.7547023677344e-06	0.08810416214696992	-3.5046460143639293	down
MW8204	Met Met Leu	C16H31N3O4S2	358.1617	393.1756	0.6468	4.5767	1	--	--	--	15986.0	1	-	-	6246.67	28905.97	20354.96	5845.35	8531.92	2107.12	5938.92	5128.13	1560.73	24461.58	22798.73	49275.97	16918.16	30337.42	26679.08	43759.94	34944.2	38405.86	1381.31	31813.26	1.1034535404113697	0.0029322029474800285	2.7164490538483435	1.441721989969084	up
MW8000	Leu Asp Gln	C15H26N4O7	174.0873	374.1802	0.6468	0.8528	1	--	--	--	19105.0	1	-	-	409907.17	93603.98	621444.96	300795.11	253388.12	260334.33	339705.48	46530.21	55579.64	101707.09	312.82	3339.34	879.12	3975.4	4337.33	3733.1	4237.4	4834.5	6010.9	4427.93	1.2708061677074314	0.0021778055766895218	0.014533989862223262	-6.104425384650978	down
MW7254	Dihydroclavaminic acid;Dihydroclavaminate	C8H12N2O4	239.0429	200.0797	0.6468	1.3062	1	--	--	C06659	--	1	-	-	9198.92	1136.39	8149.93	10319.83	9351.02	10397.09	10509.67	1483.04	1265.06	3951.35	188.85	1213.92	849.28	906.21	407.34	664.3	551.66	829.77	92.24	924.59	1.310561984197858	0.0013601625774940596	0.1007896621620594	-3.3105804234342044	down
MW6248	Abrusoside A	C36H54O10	691.3431	646.3717	0.6468	4.006	1	124962-06-7	--	C08920	--	1	-	-	31285.24	24285.7	18823.6	31505.13	42073.82	30715.18	33496.27	68627.52	59297.7	28078.15	2039.86	16018.85	5059.66	3036.99	28543.1	6000.61	13159.5	3111.43	9565.99	460.64	1.3246962242807987	0.0002047500648733032	0.2362829770450887	-2.0814124004773458	down
MW7647	Halstoctacosanolide A	C48H76O12	921.4529	844.5337	0.6467	4.8628	1	--	--	C15766	--	1	-	-	13560.25	2366.66	23041.79	16762.23	16994.13	19221.23	19212.16	9672.59	12217.23	2919.72	245.91	150.88	170.86	642.18	370.99	210.08	203.79	213.22	374.35	163.66	1.4579271597195138	0.0001820879267993439	0.02019534156531989	-5.629833643118428	down
MW6317	AGK2	C23H13Cl2N3O2	905.0401	433.0385	0.6467	4.4892	1	304896-28-4	--	--	45470.0	1	-	-	7556.38	6882.46	17210.64	3485.7	6668.52	3203.22	5558.5	10054.26	9292.06	3039.29	20280.43	14719.51	50273.4	70025.47	31386.39	28340.62	45292.42	24231.63	169024.95	32508.04	1.0028715169073792	0.018154713864935827	6.6631390948146985	2.7362020105661022	up
MW2956	Trimeprazine	C18H22N2S	314.1696	298.1504	0.6467	13.2314	1	84-96-8	HMDB0015376	C07172	2942.0	1	-	-	44189.23	38582.83	64661.11	64070.44	55356.82	47465.23	35048.47	48716.78	46262.9	50877.25	28968.17	31901.27	18720.89	10952.97	22642.23	21601.65	42604.2	24921.32	19116.22	23060.65	1.4562111815034666	9.490321048461713e-06	0.4936878757160344	-1.0183288799463617	down
MW1202	Dihydroberberine	C20H19NO4	356.1304	337.1314	0.6466	4.2259	1	483158	HMDB0033524	--	--	1	-	-	7700.7	2996.75	1174.85	5698.72	4900.39	5759.32	8108.28	6243.75	15816.06	1011.06	50714.91	68809.41	32756.86	25693.57	32342.24	33968.96	36801.42	41390.96	24713.06	27105.82	1.5132411739768044	2.4471440146735424e-05	6.30025191096161	2.6554095148711587	up
MW181	2-AminoAMP	C10H15N6O6P	365.07800000000003	346.0791	0.6466	3.9207	1	--	--	C01655	--	1	-	-	2963.5	1333.31	2512.97	2924.56	3572.6	3870.98	2531.6	1829.99	2266.12	570.1	8461.93	8320.74	15807.61	15028.94	10204.59	14486.57	10021.04	11087.9	11251.45	12948.28	1.6433805233382224	3.9119118574361156e-07	4.825252412953376	2.2706044129281384	up
MW6805	Cefclidin	C21H26N8O6S2	551.1491	550.1417	0.6466	4.6432	1	105239-91-6	--	C11202	--	1	-	-	77181.98	4837.0	12377.6	87572.25	3555.77	56569.2	73786.79	136748.14	4383.73	114921.63	1411818.42	603307.46	1151473.78	452831.24	573987.79	511283.88	354804.85	622930.94	1127831.1	694685.07	1.4611279333586622	0.00014053205328882825	13.122061897027333	3.713922526344456	up
MW6546	Atalanine	C34H30N2O9	628.2291	610.1951	0.6465	4.8012	1	50906-85-9	--	C10644	--	1	-	-	1972.91	7213.74	46401.14	17359.77	1672.86	3314.34	11135.71	5875.43	4942.44	4330.86	165395.18	45414.57	264580.65	176837.1	112761.75	121593.44	95195.3	115965.27	304531.89	182957.39	1.4374734954341668	0.00018971245333822587	15.210561393677942	3.92700149613706	up
MW2897	Thr Phe Met	C18H27N3O5S1	396.1599	397.1671	0.6464	4.7182	1	--	--	--	16225.0	1	-	-	72314.08	34224.7	49140.18	67494.05	66640.26	88693.68	76200.41	57456.16	49898.61	46181.21	4035.52	5713.03	1734.47	12628.45	12118.26	22832.57	381.07	24341.6	20060.64	25047.43	1.562913504476718	1.080325191759855e-06	0.2119103186563457	-2.238474255587424	down
MW7384	Ergocalciferol	C28H44O	511.2143	396.3392	0.6463	2.1091	1	--	HMDB0000900	C05441	--	1	-	-	31087.78	2056.73	5796.18	33970.85	30776.32	34670.31	35319.54	30524.8	28805.25	3467.35	6752.09	6064.97	2027.28	242.57	273.83	384.08	656.52	270.16	2062.74	579.82	1.3194386857513294	0.00074314001038188	0.08167481135752512	-3.6139649722678273	down
MW9573	Trazodone hydrochloride (Desyrel)	C19H23Cl2N5O	815.2631	407.12800000000004	0.6463	4.9652	1	--	--	D00820	--	1	-	-	13091.25	15080.3	10495.78	14583.42	2546.3	2917.39	7051.29	15905.03	4838.02	9246.55	102936.04	108589.07	214239.25	39741.03	87847.21	68192.29	8591.12	149617.92	108393.32	122735.78	1.3456844238977828	0.0006574497107087487	10.556937457162961	3.40011946782492	up
MW9538	Tolazamide	C14H21N3O3S	661.2238	311.1304	0.6462	12.5429	1	--	HMDB0014977	D00379	--	1	-	-	8706.67	8936.15	9395.89	8337.51	9200.97	9374.95	9166.57	5997.89	37.91	7891.06	234.33	119.27	2091.62	2577.54	1031.01	1829.4	48.09	2243.0	74.97	2743.07	1.5095832551678636	3.12759584990425e-05	0.16863136972054332	-2.5680551556979347	down
MW7234	Dicyclomine	C19H35NO2	327.3007	309.2668	0.6462	11.2314	1	77-19-0	HMDB0014942	C06951	1997.0	1	-	-	13188.1	4244.92	5063.26	8362.09	6864.82	12008.29	5645.34	6659.71	6042.33	4301.97	19111.99	26441.33	28724.74	31511.48	27013.3	21615.96	16911.42	25367.45	33248.05	9331.21	1.5048914384687426	2.130557188685336e-05	3.305805280210244	1.7250017489652696	up
MW1259	dTDP-4-oxo-5-C-methyl-L-rhamnose;dTDP-4-oxo-6-deoxy-5-C-methyl-L-mannose	C17H26N2O15P2	576.1	560.0808	0.6461	1.8083	1	--	--	C11460	--	1	-	-	24156.62	88257.24	9588.04	34264.3	30753.96	22550.94	24778.91	51465.54	39601.64	85166.98	154738.45	282961.84	158434.47	165681.93	226338.91	189712.52	262051.23	121875.05	155071.4	162032.83	1.5544756561763458	2.099096721028284e-06	4.576159451057259	2.1941373220555063	up
MW8434	Nemonapride	C21H26ClN3O2	405.2053	387.1714	0.6461	6.6176	1	75272-39-8	--	C12915	--	1	-	-	1795.3	1028.32	1116.45	750.32	1292.22	2261.98	830.18	1857.64	1719.65	6835.07	44696.65	578.18	9257.79	8007.67	32289.26	56559.16	14429.17	49793.07	64196.78	5106.79	1.1767898776465169	0.006465869052230086	14.620650655073376	3.869935611099752	up
MW8091	Lys Asn Gly Glu Arg	C23H42N10O9	679.2326	602.3136	0.6461	4.9254	1	--	--	--	264090.0	1	-	-	2955.05	2952.08	2325.39	6058.88	1882.02	4174.75	7857.22	8824.28	6123.73	2260.55	37136.74	12017.41	116973.66	32760.87	31774.61	42448.86	10182.43	47023.22	87456.87	44426.44	1.224304794761499	0.0029920138226073997	10.177513957715632	3.3473132949173188	up
MW6933	CL(8:0/8:0/8:0/8:0)	C41H78O17P2	922.5054	904.4714	0.6461	5.0391	1	--	HMDB0116797	--	--	1	-	-	60876.4	24229.74	3882.35	52465.58	63060.85	55567.8	56588.57	21466.57	22302.61	26598.44	11418.11	8034.86	3976.55	9879.51	5930.82	4708.53	5818.48	6928.26	4020.61	6603.33	1.3156014234956903	0.0009619347430486136	0.17393357169179707	-2.5233916743833684	down
MW6949	CL(i-14:0/a-17:0/a-17:0/18:2(9Z,11Z))[rac]	C75H142O17P2	331.1623	264.2089	0.6459999999999999	2.4698	1	--	HMDB0092895	--	--	1	-	-	6199975.3	5614961.32	24021841.57	5274571.6	5493158.31	6271426.85	4773898.81	2673887.36	2161464.96	3652549.46	355146.65	109753.64	49622.09	58297.57	113868.87	98519.77	119994.1	88818.22	42740.72	84275.88	1.1058421863161514	0.009617529303418552	0.016950043735954618	-5.882567193842991	down
MW6229	8-Hydroxy-2,3,4-trichlorodibenzofuran	C12H5Cl3O2	610.8343	285.9355	0.6459999999999999	4.6886	1	103124-63-6	--	C15236	--	1	-	-	1013.23	20594.97	10938.77	1323.09	3773.22	7482.14	3453.7	12340.22	15654.0	24568.07	211370.13	182003.92	272535.64	31142.59	30994.83	20327.89	63039.48	39541.3	106677.74	167937.28	1.1141499813282922	0.00572249009638344	11.128684086962995	3.4762111059454712	up
MW9038	Rivaroxaban	C19H18ClN3O5S	871.1386	435.0656	0.6459999999999999	4.78	1	366789-02-8	--	D07086	--	1	-	-	2898.14	1672.96	1524.16	4468.83	2608.1	432.39	954.93	4006.98	2835.51	4847.02	42379.05	13672.88	80523.18	41421.24	52270.88	46853.91	54044.48	36460.03	83860.5	54070.38	1.5502914737564817	3.884523531416113e-05	19.26001542152812	4.267536953237646	up
MW8695	Penitrem A	C37H44ClNO6	672.2489999999999	633.2857	0.6459	0.7877	1	12627-35-9	--	C20070	--	1	-	-	4798.84	17856.88	1723.27	2060.14	3394.56	2183.72	2078.89	946.07	1371.43	25227.5	32991.17	63769.0	28726.34	35413.59	113771.28	17722.74	118271.41	18926.95	38686.12	40449.29	1.1706647086150879	0.0037613179146570867	8.253036357117711	3.0449249958966518	up
MW9523	THTC;2-n-Tetrahydrothiophenecarboxylic acid	C5H8O2S	133.0317	132.0245	0.6458	1.0941	1	--	--	C11074	--	1	-	-	106275.07	100507.74	128775.93	96277.59	102625.78	97910.77	92982.32	138637.35	105603.23	131433.87	49407.81	43658.0	43178.54	50739.86	61481.66	52812.12	61301.97	48044.51	59473.59	42326.13	1.638931897061261	1.771116015154615e-07	0.4654045329296991	-1.1034428325683592	down
MW1820	Linustatin	C16H27NO11	817.3094	409.1584	0.6458	0.8079999999999999	1	72229-40-4	--	C08333	66912.0	1	-	-	79874.1	197758.88	45064.05	80905.48	82503.21	78837.06	77682.91	68789.46	82610.13	207651.17	287727.86	504430.03	231546.24	354649.3	334930.44	173835.77	342588.8	172646.89	193142.65	202625.9	1.2919338513934486	0.00034415169196410603	2.793440816143776	1.4820432546358202	up
MW9739	Val Tyr Trp	C25H30N4O5	950.4773	466.2216	0.6457	4.8982	1	--	--	--	19345.0	1	-	-	24930.52	1088.68	1843.88	28582.36	34870.3	25144.75	24508.04	24385.05	29763.71	1859.17	7497.12	4410.97	4477.38	1587.16	376.0	3166.9	2026.03	461.15	5021.6	687.46	1.1907105329376737	0.0025819026168888053	0.15083919164757048	-2.728916770726905	down
MW8190	Met-TyrMe-OH	C20H22N2O7S	435.1221	434.1148	0.6457	2.157	1	--	--	--	65092.0	1	-	-	179294.85	9606.76	107227.37	196490.84	209136.5	227989.66	227046.35	43761.14	34156.83	14961.47	52983.11	104.39	191.61	14917.69	172.09	69.39	325.23	224.89	35639.0	28561.6	1.1750564994415296	0.003979367342592511	0.10657918598897373	-3.230002375387188	down
MW6760	CAY10502	C30H37NO7	590.2102	523.257	0.6457	4.82	1	--	--	--	45142.0	1	-	-	1557.96	4236.86	4061.86	1195.53	1458.85	590.49	2199.65	10618.47	8724.66	709.02	35067.43	21867.61	104833.78	99538.14	36321.86	60282.39	49390.81	28981.28	117638.65	77776.0	1.3946868388492508	0.0003984005294246114	17.868121408579388	4.159316057358895	up
MW9539	Tolbutamide	C12H18N2O3S	293.0932	270.1038	0.6456	4.1610000000000005	1	--	HMDB0015256	C07148	--	1	-	-	25362.69	20431.42	6679.68	25710.94	24894.44	23096.51	23258.44	25848.33	23669.59	23182.52	23143.5	36214.64	45653.33	32624.76	55521.29	60738.74	62121.08	47702.55	37050.31	77790.39	1.3194562974247026	0.0006627900883615089	2.1543725118684818	1.1072677273937286	up
MW9443	TG(i-22:0/15:0/21:0)	C61H118O6	549.1425	502.1298	0.6456	6.4542	1	--	HMDB0067885	--	--	1	-	-	389.07	138.28	391.24	668.89	426.52	523.07	328.28	1457.85	3111.63	217.6	10307.4	8392.59	8909.61	9847.08	9716.44	9346.29	9582.5	9549.84	8436.73	7984.33	1.753856306740167	2.150864559317695e-14	12.031839559460199	3.5887853292899528	up
MW8615	Panfuran S;Dihydroxymethylfuratrizine	C11H11N5O5	587.1592	293.07599999999996	0.6456	4.7109	1	794-93-4	--	C19289	--	1	-	-	2600.57	18593.23	30763.66	12004.64	2735.42	2289.85	4483.04	10632.89	10270.02	18718.64	90385.14	136515.99	136888.81	38848.9	182532.68	64667.09	73010.02	128444.78	119442.99	114155.54	1.5123695077680297	3.4463541780015306e-05	9.59300678845782	3.261983077902796	up
MW7508	Ganglioside GT3 (d18:1/16:0)	C79H138N4O37	246.1826	246.1831	0.6455	1.0379	1	--	HMDB0012069	--	--	1	-	-	43048.27	28382.3	42263.69	77852.94	73532.13	40467.66	30210.04	34718.58	36332.03	21583.66	14650.82	9154.0	16979.11	16134.97	13074.35	25854.06	14331.72	19903.09	17548.24	18693.94	1.2407868634078532	0.0014544174821416026	0.3882532161600854	-1.3649302194209856	down
MW7075	Cys Gly Glu	C10H17N3O6S1	632.2016	307.0838	0.6454	4.8726	1	--	--	--	23211.0	1	-	-	4098.35	2600.94	3355.25	5779.11	3530.22	2818.13	4562.7	33136.03	26615.54	1696.11	40555.87	60685.71	87221.47	9672.42	60718.05	22394.44	34530.28	54003.89	73803.89	55087.94	1.3501689372247463	0.00024862979402663046	5.654388281617981	2.499370955105955	up
MW6707	C20915;Tabtoxin biosynthesis intermediate 5	C11H21N3O6	256.129	291.143	0.6454	4.1546	1	--	--	C20915	--	1	-	-	5649.92	187.35	6320.7	6270.01	4296.86	4233.82	5613.08	88.04	203.69	40.11	45.46	59.57	53.01	49.0	94.84	103.27	172.53	78.57	453.8	33.49	1.1510677715334796	0.005941839915130104	0.034754272939297184	-4.8466658257698985	down
MW694	Asp Ile Asp	C14H23N3O8	342.1306	361.1485	0.6454	4.3857	1	--	--	--	16575.0	1	-	-	66254.9	15094.41	92096.06	66974.18	59755.15	67659.08	69474.38	30844.83	34659.7	55659.11	1695.77	1105.7	1380.34	2222.46	2220.89	1719.05	866.85	466.13	2133.93	1210.89	1.5643279902206844	3.366083702563568e-05	0.026898421728724708	-5.216334664983213	down
MW1781	Lazabemide	C8H10ClN3O	180.0332	199.0512	0.6454	0.8431	1	103878-84-8	--	D04681	--	1	-	-	13644.35	60656.82	6993.3	11638.55	17282.73	11621.12	11665.8	24539.96	22155.42	49964.12	75942.96	62442.73	66463.01	62441.99	69352.16	48279.67	60104.96	52132.38	46184.7	37093.36	1.3666915390503334	0.00010735444973572944	2.5218649963197692	1.3344910455498786	up
MW2026	N-Monomethyl-2-aminoethylphosphonate;2-Methylaminoethylphosphonate	C3H10NO3P	277.0722	139.0398	0.6453	1.1056	1	--	--	C05679	--	1	-	-	8694.79	8105.52	41830.33	6775.63	9835.8	7724.97	9649.92	17168.44	12750.83	987.71	24012.93	72350.53	31618.42	28912.55	30436.0	39673.16	27695.25	47300.61	32800.65	33281.59	1.2380778627002471	0.00047510819645577295	2.9798409118102938	1.5752353099260428	up
MW899	Chartreusin	C32H32O14	621.1612	640.1792	0.6453	1.6126	1	6377-18-0	--	C09181	67494.0	1	-	-	29194.88	669.89	1841.67	23361.47	31154.56	28036.83	32735.71	2084.72	904.26	2269.18	1194.75	1132.86	339.26	1018.65	299.8	232.97	1092.37	1427.35	567.62	3027.0	1.0380238158106705	0.01334574492048528	0.06786479388245249	-3.8811928459892826	down
MW199	2-Hydroxyethylclavam;Hydroxyethylclavam	C7H11NO3	173.0933	157.0739	0.6453	0.8872	1	79416-52-7	--	C17361	--	1	-	-	161066.26	361207.1	30920.9	142690.07	123251.33	154480.17	150322.0	240528.93	246868.88	275795.17	443968.64	601582.81	566594.97	367895.37	393852.55	471090.37	382598.9	464431.2	435131.66	357657.22	1.4930568606539154	3.5179049901848365e-06	2.376519776072121	1.2488504069936963	up
MW7520	Gibberellin 2-O-beta-D-glucoside	C25H32O11	575.1479	508.1945	0.6452	0.8964	1	--	--	C04070	--	1	-	-	5978.34	11787.21	2393.84	5270.35	7855.42	8079.7	7776.65	3382.3	1386.25	26117.3	7567.51	25985.6	20921.08	20554.42	26759.95	16138.26	27914.07	18021.55	6856.92	14285.77	1.0421905709688517	0.0046870872009418816	2.3117734984635248	1.2090000532663303	up
MW1164	Dexmedetomidine	C13H16N2	237.08	200.1313	0.6452	5.8184	1	--	HMDB0014771	C07450	--	1	-	-	223641.14	37298.33	167456.27	221295.02	188916.46	227700.15	201109.75	113605.39	267171.23	10402.39	490792.0	257694.08	239907.78	318562.17	610787.01	434117.98	1103119.0	651753.11	1082169.67	413442.64	1.2278988039096264	0.0029584032561081413	3.377763482421728	1.7560683113590982	up
MW7738	Hypericin	C30H16O8	1031.1582	504.0845	0.6452	4.8791	1	--	HMDB0034271	C07606	--	1	-	-	31352.96	15632.85	18057.14	29555.42	32313.86	31779.91	40900.47	48451.51	40574.35	10517.34	6699.32	6534.48	3159.08	8651.93	4238.4	5169.31	5495.12	4658.3	8748.94	6830.19	1.4447892784028964	0.00013274270679788997	0.2011964732674433	-2.3133230782337986	down
MW2690	TG(20:0/i-16:0/i-14:0)	C53H102O6	279.0192	260.0202	0.6451	4.3066	1	--	HMDB0063881	--	--	1	-	-	84281.13	31307.85	29079.52	93448.45	77046.85	92863.69	93152.21	11882.91	5752.86	614.7	277.04	12352.24	11692.75	413.73	340.28	257.1	251.98	136.73	7474.69	191.32	1.1925473000189624	0.0036620091801810094	0.06427786048700251	-3.95953428061488	down
MW9082	SAQUINAVIR MESYLATE	C38H50N6O5	734.4002	670.3843	0.6451	4.8049	1	--	--	C12560	--	1	-	-	6203.67	11684.01	10744.73	2302.05	2668.78	4116.46	1887.74	14889.21	7840.68	3787.73	45116.99	22266.84	44473.34	68092.43	44841.8	81761.61	52817.15	75221.99	76239.54	53627.62	1.5990743238458998	8.859428074536402e-06	8.53623890851668	3.0936005542444525	up
MW7591	Gly Ala Asn Val Arg	C20H37N9O7	557.3153	515.2816	0.6451	4.7592	1	--	--	--	264502.0	1	-	-	8919.01	7951.43	8767.65	6145.9	1260.24	4970.65	6405.41	11666.28	5280.09	1989.94	64897.72	27149.12	71732.19	40242.99	29835.32	44295.88	27385.58	27120.95	76918.61	56448.15	1.4822329650522728	9.580744490767347e-05	7.355611096555054	2.878845204069661	up
MW5751	19-Hydroxy-8-O-methyltetrangulol	C20H14O5	686.202	334.0841	0.645	13.209000000000001	1	--	--	C12400	--	1	-	-	237539.09	221441.26	161483.9	140847.47	168228.92	338469.78	519897.47	467753.77	725236.09	592638.36	41768.66	49965.91	79993.21	94232.21	59665.71	2424.45	23189.17	31489.01	93752.5	228626.58	1.261422575929495	0.0015817829192196731	0.19731363789129305	-2.3414374194231367	down
MW8467	Nimesulide	C13H12N2O5S	291.0435	308.0467	0.645	4.3621	1	51803-78-2	--	D01049	44341.0	1	-	-	21715.91	17450.29	17909.01	41562.01	41921.86	48467.28	42894.43	1696.24	790.89	18888.24	8079.9	7769.2	6922.59	4736.72	4739.58	495.09	5055.89	981.6	5596.71	474.36	1.188468778540669	0.004183052313308883	0.17707193034430524	-2.4975925624284456	down
MW8192	Met Arg	C11H23N5O3S1	305.1517	305.1522	0.645	2.4611	1	60461-10-1	--	--	23655.0	1	-	-	21732.22	42564.08	70543.99	19565.38	21106.23	28462.21	19435.1	13177.4	10045.38	13550.34	9833.12	20213.83	3282.99	3889.75	6709.99	4325.83	9747.98	3650.49	8868.97	6804.45	1.065772426982615	0.011372590012034226	0.2972046564422726	-1.7504713754659371	down
MW6948	CL(i-14:0/a-17:0/a-15:0/a-17:0)[rac]	C72H140O17P2	286.0709	244.0372	0.645	1.4485	1	--	HMDB0092739	--	--	1	-	-	11184.55	17915.31	5000.78	11028.88	17173.57	8087.34	3552.02	5183.45	9779.28	13587.74	12043.12	49371.32	29851.38	54156.58	57590.67	33064.01	59487.0	38276.64	33707.65	39615.16	1.458186318567715	6.597538449946049e-05	3.9726015221344073	1.9900840889528577	up
MW9775	YM-201636	C25H21N7O3	935.3483	467.1706	0.6449	4.9752	1	371942-69-7	--	--	45562.0	1	-	-	809.07	555.21	587.39	1107.85	980.98	1508.73	861.31	1483.73	1204.48	1615.67	18869.75	944.15	17963.13	10987.03	25735.81	24900.15	23564.63	18438.71	21706.36	15704.48	1.5573358319046078	5.31406452583689e-05	16.689116163077426	4.060835648095443	up
MW7289	Disperse Blue 1;1,4,5,8-Tetraamino-9,10-anthracenedione	C14H12N4O2	268.0954	268.096	0.6449	3.7136	1	2475-45-8	--	C19236	--	1	-	-	31828.19	486.08	70896.35	25438.2	32807.96	34019.99	28078.71	20219.64	25608.54	115.44	1406.94	3427.06	705.88	1244.21	704.76	4329.89	1680.77	3938.01	401.69	878.27	1.221444505054883	0.0030221188061187072	0.06945284789448276	-3.8478223370510047	down
MW2040	N3'-Acetyltobramycin	C20H39N5O10	525.2889	509.2697	0.6449	13.2374	1	--	--	C03010	--	1	-	-	9663.35	1699.66	48326.39	17592.68	11832.29	16825.46	25483.96	27138.3	31053.86	12500.05	3237.53	893.54	874.92	2272.04	294.31	9369.73	361.81	5853.73	750.23	4009.97	1.2310714791594852	0.002373869583952001	0.13812765936392962	-2.8559258539907537	down
MW1380	Galb1-3[Neu5Aca2,6]GalNAca-Thr	C32H53N3O22	814.2886	831.3121	0.6448	0.9365	1	--	--	--	3613.0	1	-	-	7101.12	38131.41	7773.82	7973.93	10278.15	6561.77	4646.93	4317.36	2649.81	56042.24	96336.61	105792.37	43646.51	35228.7	79097.47	34813.42	78630.09	36765.4	17075.3	23647.16	1.1125995268794784	0.0033655652797613023	3.787779321669322	1.9213522809627444	up
MW7455	Flumetover;N-Ethyl-N-methyl-4-(trifluoromethyl)-2-(3,4-dimethoxyphenyl)benzamide;EMTDB	C19H20F3NO3	757.2682	367.1395	0.6448	4.8492	1	154025-04-4	--	C10939	--	1	-	-	3337.23	5295.12	3979.41	2461.58	3021.6	4600.29	906.12	10863.29	7259.75	1155.52	39579.4	28379.22	63381.29	41702.16	38465.43	63552.9	48840.37	39529.3	65394.27	57672.94	1.656070207245529	1.0731103884527854e-06	11.345576051815407	3.5040579560791056	up
MW1289	Epothilone D;Desoxyepothilone b	C27H41NO5S	507.2899	491.2705	0.6448	4.6435	1	189453-10-9	--	C12039	--	1	-	-	185913.61	22183.17	54992.54	184187.52	177188.54	184582.73	193064.37	191258.16	170085.16	20770.76	46457.91	1668.34	26885.07	15816.16	45377.71	24060.82	34055.15	23871.22	36249.78	16247.05	1.2851932221487128	0.0009490782707002775	0.1955526774460967	-2.3543708057520085	down
MW6175	6''-O-Carbamoylkanamycin A	C19H37N5O12	642.1188	527.2439	0.6448	4.2863	1	--	--	C20699	--	1	-	-	721.62	8213.92	569.02	3460.82	383.19	354.35	494.11	9719.15	8328.01	2718.4	95952.15	95458.43	70676.55	81569.39	35028.81	48554.53	43589.57	42373.43	7703.77	38197.28	1.405606524259854	0.0002626124317131358	15.99149004693302	3.9992324666741377	up
MW2621	Tandutinib	C31H42N6O4	578.3462	562.3268	0.6447	10.3266	1	387867132	--	D06005	--	1	-	-	30154.6	42693.03	49275.46	31174.9	24294.98	30861.92	37010.71	21217.74	18817.1	30419.4	105349.93	101052.16	64018.65	123740.69	55796.23	194546.14	60821.17	135311.02	982.63	139241.6	1.1772843437275542	0.003844984363897924	3.1047756291595983	1.634489013890282	up
MW2923	Trandolaprilat	C22H30N2O5	803.4235	402.2155	0.6447	4.6685	1	--	HMDB0060583	C21515	--	1	-	-	11024.65	8217.34	8074.62	10752.46	9972.37	10762.32	9925.41	1510.47	1228.4	14139.19	322.02	2057.71	2396.53	527.83	284.98	1876.38	1109.25	2075.43	272.19	1982.6	1.4236631524345478	0.0003105677862285282	0.15074567884044374	-2.72981144735446	down
MW7524	Ginkgetin	C32H22O10	566.1209	566.1213	0.6447	4.0049	1	--	HMDB0033762	C10048	--	1	-	-	112533.21	72168.23	419793.25	132523.22	100291.21	140835.99	155583.74	95083.61	110526.79	78069.38	468.98	283.37	814.62	2484.36	506.96	1925.81	8063.0	2455.66	330.31	943.21	1.2920192875548202	0.0017925096997831863	0.012894150362270616	-6.2771394774093485	down
MW7984	Latanoprost-d4	C26H36D4O5	475.2758	436.3127	0.6446	4.7982	1	--	--	--	96388.0	1	-	-	18156.22	14510.45	49282.11	15511.51	15128.43	18506.49	11452.39	727.27	228.37	2512.04	831.84	488.27	404.99	850.7	514.27	2909.85	117.49	458.61	174.56	3355.41	1.0517839902929542	0.013808272946231008	0.06921186604580014	-3.8528367874928695	down
MW7736	Hydroxytolbutamide	C12H18N2O4S	269.0954	286.0987	0.6446	0.9135	1	5719-85-7	--	--	2869.0	1	-	-	71061.25	292570.18	83658.31	55845.01	85096.46	48089.56	46292.84	32352.62	40750.09	169901.87	89502.89	239978.1	172314.2	248136.73	294042.41	174105.61	308537.86	171713.45	143920.51	227234.26	1.0960286082886368	0.003150127515390517	2.235787976465761	1.1607833814705717	up
MW1718	L-2-Amino-6-oxoheptanedioate;L-2-Amino-6-oxopimelate	C7H11NO5	188.0563	189.0637	0.6446	0.9546	1	--	--	C03871	--	1	-	-	60673.2	28866.83	34240.53	67060.34	71940.91	71777.12	77186.51	34903.84	40899.41	50618.73	3625.26	1392.25	4474.01	11181.19	12287.79	10343.83	6790.12	10841.52	5432.88	11805.6	1.5608311172452314	1.5427251457648486e-05	0.14526046560009154	-2.7832859854714584	down
MW7702	His Leu Tyr Lys	C27H41N7O6	524.2978	559.3118	0.6446	4.82	1	--	--	--	155467.0	1	-	-	55724.75	59719.36	93147.87	62761.68	40558.32	54249.2	75899.15	186169.85	156076.98	36855.02	236898.54	90079.08	385057.18	307034.27	115751.34	137565.0	90903.69	109183.9	457725.5	280698.96	1.0448923720593868	0.009686860931001665	2.6924004951129152	1.42889302708709	up
MW6488	Asn Arg Gln Lys	C21H40N10O7	589.2795	544.3081	0.6446	4.0049	1	--	--	--	197347.0	1	-	-	20586.12	1393.93	6557.44	27892.4	27074.1	21061.14	20039.89	11408.54	19267.44	9538.81	815.38	969.44	463.79	992.23	371.67	258.82	193.74	291.41	640.75	657.67	1.4082891661193642	0.00029149015252753215	0.034309589363074745	-4.8652443307809605	down
MW8437	Neostigmine methylsulfate	C12H19N2O2.CH3SO4	686.2738	334.1199	0.6445	10.6141	1	51-60-5	--	C08200	--	1	-	-	17982.11	89650.15	15434.89	16706.07	16744.98	18554.6	13128.52	18847.1	46205.47	20956.03	73813.36	164909.73	80872.8	73135.64	107119.01	107283.11	75035.74	131154.93	3199.37	108636.47	1.236082842894875	0.0008900053363382836	3.3739120743698847	1.7544223768491296	up
MW9119	Ser Ile Tyr	C18H27N3O6	448.1434	381.19	0.6444	0.7711	1	--	--	--	15945.0	1	-	-	26104.53	32608.78	1184.04	23678.06	27094.34	13789.88	21324.57	18274.08	25971.4	12102.76	91416.44	39978.29	67061.68	29863.95	19968.26	49608.69	37833.76	33109.47	36173.72	36017.95	1.1181519541283145	0.0058092530218729005	2.181897225403305	1.1255831475400777	up
MW6602	Benzoin	C14H12O2	425.1748	212.0837	0.6444	2.157	1	--	HMDB0032039	C01408	--	1	-	-	10136.85	12103.37	18920.66	10432.35	10304.64	14522.41	14275.71	3317.81	3574.34	12547.74	286.05	632.61	1030.15	902.45	1861.28	226.65	778.78	528.41	826.8	316.08	1.5294111887205522	7.425986485012509e-05	0.06709221372726128	-3.897710843153556	down
MW9521	Thr Tyr Ser	C16H23N3O7	414.125	369.1536	0.6444	1.4448	1	81161-89-9	--	--	16361.0	1	-	-	3526.96	20032.4	23625.06	1376.65	4133.13	3757.31	2686.35	706.61	2896.02	19982.14	11266.68	69753.65	35309.47	60380.85	75968.76	34671.7	84783.95	33885.28	41699.65	36541.83	1.3463777369369925	0.00027923132693045695	5.854042841722996	2.549433303880443	up
MW8493	O-Feruloylgalactarate;O-Feruloylgalactaric acid;2'-(E)-O-Feruloylgalactaric acid	C16H18O11	425.048	386.0849	0.6443	10.6337	1	--	--	C03156	--	1	-	-	12557.55	30062.82	11148.05	13977.68	11152.05	11852.66	12877.62	14395.75	16366.3	27457.89	29897.4	46012.21	44877.62	37935.14	50887.49	46449.19	23613.83	37185.88	2372.55	37867.16	1.1837894711335877	0.0018611298041191987	2.2063766845473953	1.1416791166483709	up
MW8180	Mephosfolan	C8H16NO3PS2	561.0512	269.0309	0.6443	4.1595	1	950107	--	C19007	--	1	-	-	1611.85	972.32	777.79	2042.91	3918.38	2901.08	2300.32	1956.44	1532.67	2633.41	4249.22	14296.06	13994.44	18462.12	18291.73	19279.59	23947.48	7897.2	33020.71	4305.0	1.3476094855286458	0.0008975514894113123	7.639959858905603	2.933565058220453	up
MW7640	GYKI 52466;4-(8-Methyl-9H-1,3-dioxolo[4,5-h][2,3]benzodiazepin-5-yl)benzenamine	C17H15N3O2	332.0795	293.1164	0.6443	3.3334	1	102771-26-6	--	C15040	--	1	-	-	12541.12	12061.66	5172.62	12107.71	13760.25	13507.06	13003.16	11916.28	14046.17	9211.69	22001.57	39276.6	30748.07	29691.0	28593.1	22793.04	33965.25	29339.55	29319.86	19184.41	1.5726113296220499	2.309033920729412e-06	2.4283472822961185	1.2799747587511865	up
MW6595	Benzeneacetic acid, 3-[3-[[[2-chloro-3-(trifluoromethyl)phenyl]methyl](2,2-diphenylethyl)amino]propoxy]-	C33H31ClF3NO3	658.1137	581.1945	0.6443	4.8349	1	405911093	--	C15631	--	1	-	-	1581.89	3992.82	8072.49	3884.02	454.44	3062.61	2278.04	10386.94	3370.21	1567.99	58313.48	21115.67	102868.78	64833.13	63793.6	58461.92	67802.7	54771.89	72292.38	88422.46	1.6044385052908638	6.887247148345509e-06	16.886197283672413	4.077772569404757	up
MW51	(R)-lipoic acid	C8H14O2S2	222.0628	206.0435	0.6443	4.0166	1	--	HMDB0001451	C16241	--	1	-	-	5608.89	4549.98	4715.45	3528.8	4240.02	5488.5	5410.58	6207.32	4658.82	6257.15	13948.96	16290.4	22277.32	24999.11	15801.97	25191.63	16848.33	20562.17	10993.34	25828.5	1.5772166702554398	9.689728641960773e-06	3.8041999379854254	1.9275930721605905	up
MW6741	Carbamorph	C8H16N2OS2	458.1746	220.0704	0.6442	0.7794	1	31848-11-0	--	C18923	--	1	-	-	52838.2	105315.49	71604.26	56532.87	53034.04	52382.05	56907.2	36073.81	30950.3	117782.06	164229.72	319844.67	158444.86	292043.66	244606.64	174589.66	237899.98	172354.35	187444.22	116036.4	1.4609942767818946	2.844859292154222e-05	3.2640163652480467	1.7066482907662135	up
MW6422	Apodine	C21H22N2O4	433.1114	366.158	0.6442	0.8169	1	57932-86-2	--	C09034	--	1	-	-	25304.29	20612.74	12660.06	25864.3	22716.34	24759.24	24783.75	23471.07	23182.03	18582.78	7562.08	2681.75	9956.79	9658.79	3972.02	2077.76	3604.71	3008.51	10057.35	1460.36	1.6189542115886193	1.1485605838481598e-08	0.2434935021983756	-2.038044821435021	down
MW1808	Leu Trp	C17H23N3O3	298.156	317.1739	0.6442	13.234000000000002	1	5156-22-9	--	--	23823.0	1	-	-	308439.13	174855.02	259714.3	197404.03	175321.14	176858.05	185782.93	160843.85	185490.15	264677.87	102783.43	85175.01	57702.5	63947.79	58211.78	97102.03	101885.62	68876.6	136963.18	109815.67	1.5108215272046075	1.0510039269674824e-05	0.42235537688726393	-1.2434706771989832	down
MW7390	Estra-1,3,5(10)-triene-3,17beta-diol 3-phosphate;Estra-1,3,5(10)-triene-3,17beta-diol 3-(dihydrogen phosphate);17beta-Estradiol 3-phosphate	C18H25O5P	416.1597	352.144	0.6441	1.2856	1	--	--	C15424	--	1	-	-	3927.49	7885.91	14856.73	2575.35	2447.12	2412.9	1620.82	5051.16	2102.24	8528.77	14437.07	40177.38	8683.24	4716.97	44586.82	29715.97	47602.76	29471.66	12865.42	13945.56	1.1846133162608328	0.003400096155478845	4.789147668021371	2.259768920150584	up
MW6127	5'-S-Methyl-5'-thioinosine;5'-Deoxy-5'-methylthioinosine;S-Methyl-5'-thioinosine	C11H14N4O4S	597.1544	298.0736	0.644	12.651	1	17298-58-7	--	C19787	--	1	-	-	5620.14	4499.33	9480.04	8323.71	6603.74	6868.49	5803.63	4472.9	4105.94	1142.91	11165.39	11786.47	22475.78	18814.07	12761.14	15910.36	14930.17	14638.05	7643.21	4863.3	1.2859826442824758	0.0007906661219284696	2.3715033670450696	1.245801916747938	up
MW2643	Tetraethyl dithiopyrophosphate	C8H20O5P2S2	342.9975	322.0227	0.6439	2.9821	1	3689-24-5	--	C18691	--	1	-	-	31274.33	15396.08	1698.03	31896.26	21928.2	40715.42	42109.56	15810.0	13100.57	19859.59	17635.25	2116.28	2184.87	23902.69	3248.26	10264.9	3640.66	5255.89	16456.5	422.09	1.0371257250614043	0.007487950227346684	0.3641220911044038	-1.4575058238660958	down
MW9269	TG(16:0/20:4(5Z,8Z,11Z,14Z)/20:4(5Z,8Z,11Z,14Z))	C59H98O6	415.1452	414.1378	0.6439	0.7949	1	--	HMDB0005392	--	--	1	-	-	52537.74	93075.32	30670.37	52038.1	48303.98	52734.38	51298.24	34985.93	34719.93	96259.86	88075.31	115209.03	120641.67	98595.81	260436.73	80661.01	245110.12	83703.12	148183.99	181227.34	1.2032478012145886	0.0022050915759650367	2.6011381135309044	1.3791430045927255	up
MW8997	Ranunculin	C11H16O8	575.1582	276.0845	0.6439	4.627	1	644-69-9	--	C08512	--	1	-	-	4467.71	3197.52	72587.35	22259.87	31820.07	21892.61	707.48	1155.5	2998.6	2273.11	953103.9	450283.42	700736.61	232670.28	145072.96	209789.09	143582.18	194526.39	551172.77	430130.48	1.276180843598206	0.001483930863605971	24.553577985088378	4.61786136648322	up
MW7157	Deoxylimononic acid D-ring-lactone	C26H34O9	557.1735	490.2203	0.6439	0.7811	1	--	--	C04251	--	1	-	-	1757.15	15574.09	1966.48	2297.73	2050.51	1849.28	1566.05	1267.63	1101.95	6429.79	37791.94	66073.07	22752.3	55841.69	48982.52	26989.49	56560.69	29852.73	35462.03	27808.34	1.5308064559749015	1.4479728602583026e-05	11.380571355909233	3.5085010841350983	up
MW8974	Pyraclostrobin	C19H18ClN3O4	387.0982	387.0986	0.6438	3.9511	1	175013-18-0	--	C18561	72366.0	1	-	-	16962.61	19309.99	360.94	16964.11	13668.86	16374.73	17636.36	16805.81	14096.05	18222.95	7179.44	5513.98	2139.75	2933.99	1208.81	1903.29	1233.75	2555.22	1458.61	1738.57	1.4933784861547024	2.8724434127917725e-05	0.1852723636542792	-2.4322803985867165	down
MW9356	TG(a-21:0/8:0/a-25:0)[rac]	C57H110O6	649.2461	602.2332	0.6438	4.7675	1	--	HMDB0065822	--	--	1	-	-	123882.88	45063.17	125515.75	108201.14	94871.44	120124.61	139095.79	926513.06	555842.81	14724.32	1654563.64	549409.39	2005748.48	657672.25	907931.53	888223.67	886654.7	805086.78	2034856.81	716921.67	1.3033052247348824	0.000641942922969411	4.92807551033783	2.301024361867903	up
MW7569	Glu Gly Asn Ile Asp	C21H34N6O11	511.2148	546.2286	0.6438	2.3363	1	--	--	--	264486.0	1	-	-	48454.41	2731.86	10680.07	45026.37	45450.91	55960.83	57652.86	43538.67	87399.44	1648.18	17518.71	8385.1	2836.53	887.37	318.45	323.04	513.03	115.31	3613.63	1023.04	1.210635231247164	0.002154831882990729	0.08916015713211804	-3.4874570306296424	down
MW9691	Undecaprenyl phosphate alpha-L-Ara4N;4-Amino-4-deoxy-alpha-L-arabinopyranosyl ditrans,octacis-undecaprenyl phosphate	C60H100NO7P	978.7312	977.7237	0.6437	4.7955	1	--	--	C16157	--	1	-	-	15884.18	24225.57	15931.93	18900.38	23000.52	21554.69	22971.46	5689.46	10069.48	29119.68	1431.79	1911.84	258.02	2516.52	2138.59	912.99	3580.06	2174.94	206.83	566.2	1.5678302159505	2.442429380385294e-05	0.08378970932868812	-3.577083120218944	down
MW2718	TG(21:0/i-16:0/18:0)	C58H112O6	609.1459	628.1639	0.6437	1.2072	1	--	HMDB0064949	--	--	1	-	-	24423.96	11524.22	17086.89	24432.82	26135.59	28328.0	27674.46	37947.63	28448.74	14061.52	12742.59	5986.87	20929.24	4637.97	575.14	5516.7	1484.88	5320.74	5351.22	8373.91	1.3896847130469592	4.61484132839481e-05	0.2954183476952776	-1.7591686638185977	down
MW9488	Thioridazine 5-sulfoxide	C21H26N2OS2	351.1348	386.1487	0.6437	4.7094	1	7776-05-8	--	--	2836.0	1	-	-	15644.87	731.89	1487.61	5815.02	15315.2	9084.09	2250.14	3238.85	8266.86	4081.41	5090.53	14174.82	15819.09	11654.73	19544.22	40647.84	19706.36	31187.02	3659.95	19347.43	1.0410069662830688	0.011847054770612228	2.743372695587744	1.4559506300430605	up
MW6352	Alangimarine	C19H16N2O3	321.1235	320.1161	0.6437	4.9044	1	77156-16-2	--	C09329	--	1	-	-	5219.06	4724.21	2930.79	1310.79	9196.35	3442.67	4279.54	1595.46	3931.05	1954.57	777.82	11094.64	4061.47	10766.82	14765.01	15900.21	16241.53	19084.82	1092.34	15026.74	1.067392211363174	0.009022692102963735	2.8200813331989094	1.4957367715994727	up
MW8845	Polythiazide	C11H13ClF3N3O4S3	502.9866	438.9709	0.6437	4.796	1	--	HMDB0015419	C07766	--	1	-	-	928.1	3691.77	13653.78	9385.05	11551.9	832.82	4928.11	3757.18	2853.32	648.57	117332.55	39796.45	158523.89	93861.59	67319.9	56523.57	49588.8	65676.76	143064.72	82390.01	1.4792496592684858	0.00011139298707217657	16.734983706869155	4.064795241308847	up
MW6548	Atovaquone	C22H19ClO3	367.1095	366.1023	0.6437	2.4811	1	--	HMDB0015249	C06835	--	1	-	-	39890.08	50093.52	133156.6	29089.14	43413.93	33268.87	33122.44	23968.94	21346.55	31162.09	1478.47	691.89	346.56	517.68	833.04	732.3	928.71	947.43	7360.88	942.45	1.252216572412449	0.002600749575330196	0.03370353515396243	-4.890956266569238	down
MW9704	V-PYRRO/NO	C6H11N3O2	175.1191	157.0851	0.6436	3.7115	1	179344-98-0	--	--	62984.0	1	-	-	69930.31	14110.68	189333.0	58787.15	54309.9	64475.0	68758.31	54198.15	36446.53	8152.07	2129.41	2658.39	3066.12	761.92	3759.97	5003.94	2692.38	2969.88	4684.54	1334.93	1.1867849907097936	0.004593110806276072	0.04698694957858604	-4.411596079637222	down
MW8680	PE(18:2(9Z,12Z)/20:0)	C43H82NO8P	852.8014	834.7676	0.6436	4.8465	1	--	HMDB0009097	--	--	1	-	-	14913.06	9769.81	12684.75	9142.98	13465.2	12140.71	14732.01	12360.88	14888.59	5273.91	64003.29	22728.54	60312.46	52244.5	32386.99	45164.48	37760.19	31318.42	78215.84	52687.33	1.4950642720842555	8.345005829565857e-05	3.994424483483969	1.997987654683871	up
MW7785	Ile Ser Asn Asp	C17H29N5O9	447.1959	447.1965	0.6436	0.8941	1	--	--	--	165701.0	1	-	-	4606.63	11877.11	6665.55	8060.23	5842.01	9445.49	4256.69	12909.66	4170.3	3976.72	78794.27	87549.43	57980.82	37878.98	35570.0	40513.15	37099.76	40180.88	10985.9	22227.48	1.3379035652041116	0.000669689314804174	6.249522805822389	2.6437460342616528	up
MW7416	EXALAMIDE	C13H19NO2	239.1754	221.1416	0.6436	3.6495	1	53370-90-4	--	D01585	44112.0	1	-	-	444.35	300.48	421.11	534.95	273.41	712.98	747.3	576.76	379.58	585.45	1702.42	2095.54	10446.21	10224.6	11114.42	4153.36	8329.6	2727.48	25605.68	9076.2	1.153707338314913	0.005603248554633172	17.1762770855061	4.1023454647563735	up
MW1216	Dihydrozeatin-O-glucoside	C16H25N5O6	404.1553	383.1805	0.6436	0.8108	1	--	HMDB12214	C16448	--	1	-	-	12573.31	26272.42	8259.7	18390.84	12807.66	18036.53	14878.84	14850.08	18268.78	24737.49	5314.38	49038.3	50096.77	45379.28	78004.82	46417.82	63968.01	40690.83	30743.19	32351.39	1.256335516823527	0.001549052255723954	2.6142427369050485	1.3863931040524486	up
MW1128	DCI;Dichloroisoproterenol	C11H15Cl2NO	268.0279	247.0531	0.6436	1.6835	1	59-61-0	--	C11772	--	1	-	-	239279.65	3201.62	173949.73	226186.4	206529.57	232290.94	356012.73	18307.12	16055.41	8062.07	58499.65	27281.18	153.76	193.15	20718.83	73.3	122.94	145.13	63.05	26304.67	1.1078938503542617	0.00825376667961029	0.09024791846642424	-3.4699625325981702	down
MW5738	17-Hydroxy-4Z,7Z,10Z,13Z,15E,19Z-docosahexaenoic acid	C22H32O3	362.2691	344.2351	0.6436	11.2655	1	90780522	HMDB0010213	--	--	1	-	-	2872.9	1292.48	2129.35	2011.42	2588.12	2029.94	3304.07	3740.67	1399.29	1815.57	13954.72	17553.36	18906.37	25549.59	12436.92	2317.73	18090.22	18065.1	15893.6	7250.8	1.4432707253774733	0.00015554488075094456	6.47082640860152	2.6939499748846543	up
MW5537	(R)-N-Methylcoclaurine;(R)-1,2,3,4-Tetrahydro-1-[(4-hydroxyphenyl)methyl]-6-methoxy-2-methyl-7-isoquinolinol	C18H21NO3	338.1152	299.1521	0.6436	4.4527	1	5096-70-8	--	C05243	--	1	-	-	44828.64	23854.07	40694.14	40905.83	52938.46	31401.18	39242.61	4103.99	1427.73	25904.41	9329.7	430.6	8113.29	7144.25	8144.87	7321.58	649.15	7634.99	12929.88	10652.36	1.2601182766820358	0.0017921664724553051	0.2369813914173767	-2.077154316624084	down
MW3081	Wyerone acid	C14H12O4	260.093	244.0736	0.6436	5.7356	1	54954-14-2	--	C08466	--	1	-	-	6829.98	10440.73	1010.68	8836.63	5384.39	9373.18	9345.99	2267.52	1327.8	19221.04	1369.35	843.36	295.83	520.3	785.15	612.33	440.91	215.52	494.14	1167.05	1.2275117882021016	0.003573106640799039	0.0910876234535969	-3.456601148866272	down
MW7438	Fenothiocarb sulfoxide	C13H19NO3S	561.2066	269.1086	0.6435	4.7842	1	103614-75-1	--	C11085	--	1	-	-	12638.8	6305.45	19505.15	9812.74	4189.39	4334.44	5096.47	18623.39	2547.57	6962.78	924640.43	287719.46	868688.17	803307.07	389063.31	498925.96	409182.24	449164.86	1294389.01	707002.29	1.4946037091259599	9.895364150986025e-05	73.67656348003214	6.203133865790838	up
MW9416	TG(i-21:0/14:0/15:0)	C53H102O6	528.024	464.0083	0.6435	4.0696	1	--	HMDB0066094	--	--	1	-	-	8699.11	14166.21	2380.8	13265.8	10871.4	7567.19	13627.07	8394.99	5399.82	16902.83	1192.75	236.76	627.33	200.73	378.47	197.42	479.59	142.58	1840.49	273.34	1.5084099004038105	7.35298211757378e-05	0.05499331425792015	-4.184599954287217	down
MW9462	TG(i-24:0/i-14:0/20:0)	C61H118O6	676.9016	562.0265	0.6435	4.7108	1	--	HMDB0069797	--	--	1	-	-	1173.79	78726.1	2920.27	2127.49	26333.9	2896.87	31968.42	76148.03	14876.0	65709.52	109409.02	298797.59	298796.08	118889.87	498109.73	233968.44	288089.79	345592.32	211438.57	184161.08	1.4562047652048582	0.00010636124512955082	8.542159134171744	3.0946007745829487	up
MW398	4,8,12-Trimethyltridecanoyl-CoA	C37H66N7O17P3S	1042.2937	1005.3449	0.6435	1.5185	1	--	HMDB60167	C07296	--	1	-	-	3634.67	1723.27	762.81	3651.89	493.2	2286.49	379.68	448.21	4776.41	4743.43	30422.38	43610.51	11238.62	42885.68	34232.28	21265.82	29628.14	8278.65	20450.66	5152.63	1.3582831759184366	0.0005668252834004523	10.793219319076021	3.432053339966747	up
MW2944	Trichilin A	C35H46O13	711.2425	674.2938	0.6434	1.2037	1	77182-69-5	--	C08786	--	1	-	-	26683.63	12888.81	3985.69	14627.02	18276.6	18153.19	12715.26	2976.37	6742.91	6580.42	1337.2	436.35	655.49	1717.47	2457.17	1955.09	2585.87	395.64	546.78	2407.71	1.2863801733555564	0.0012229535455421064	0.11724323970172265	-3.0924233561976857	down
MW1156	Derrustone	C18H14O6	325.0718	326.079	0.6434	4.8346	1	2204-59-3	--	--	44053.0	1	-	-	27686.93	28597.19	29308.09	34363.76	51669.31	36063.53	48179.77	12860.69	13519.62	33620.45	637.89	2081.22	856.36	1993.67	4528.23	5564.8	2035.88	3488.7	2510.12	2401.83	1.541318030739664	4.132742980086065e-05	0.0826249866479602	-3.5972780562911355	down
MW9393	TG(i-20:0/17:0/10:0)	C50H96O6	721.1972	756.2113	0.6433	4.0563	1	--	HMDB0063037	--	--	1	-	-	76293.49	68027.54	1289.11	54181.52	46342.89	68795.05	47050.89	52423.46	27436.49	56494.34	52125.11	14643.75	24456.1	12188.96	512.19	1765.44	3181.5	1950.84	5683.48	13986.22	1.2613956372649298	0.000519836997369169	0.26185928664260605	-1.9331363250985325	down
MW1196	Digalacturonate	C12H18O13	407.0234	370.0747	0.6433	4.5272	1	5894-59-7	--	C02273	63147.0	1	-	-	5749.99	123.56	4077.15	4547.66	6031.12	5937.05	5591.76	548.72	858.47	493.37	170.59	71.03	150.61	144.77	339.14	82.08	198.15	433.32	157.92	193.68	1.2095661740584724	0.003366074971925633	0.057165952321707	-4.128700046995326	down
MW888	Cefprozil	C18H19N3O5S	370.0866	389.1045	0.6433	7.2271	1	--	HMDB0015281	C06888	--	1	-	-	4029.7	98.19	6005.0	4748.84	3358.9	4683.97	4598.98	420.3	398.0	115.0	161.92	108.1	245.25	181.1	70.42	102.29	252.23	27.95	69.18	190.93	1.1755968088657278	0.005067125824334579	0.04952651169067024	-4.335655178812427	down
MW66	1-(4-Amino-2-methylpyrimid-5-ylmethyl)-3-(beta-hydroxyethyl)-2-methylpyridinium bromide;Pyrithiamine bromide;Pyrithiamine	C14H19N4O.Br	354.0934	338.0742	0.6433	4.4301	1	--	--	C04905	--	1	-	-	45357.83	13258.2	36076.71	52738.11	41412.79	48757.53	48300.72	10829.94	19223.35	36414.59	16554.08	18232.88	16710.41	17419.65	17784.45	511.52	17702.14	13477.79	16552.17	17263.65	1.2241095181124872	0.002505200056538355	0.43195742926528574	-1.211038957531389	down
MW8752	Phe Cys Tyr	C21H25N3O5S1	414.1483	431.1515	0.6432	0.7935	1	--	--	--	15973.0	1	-	-	74719.4	127918.46	18876.11	77832.81	85397.85	75953.97	75437.8	46152.48	51899.87	160839.46	131870.35	176479.89	187652.11	151390.51	391202.45	122928.35	387471.89	126968.92	232378.82	284905.13	1.2106182219009536	0.0018414593012880587	2.7587051533680804	1.4639912716587222	up
MW8420	Nap-Phe-OH	C27H22N2O6	493.13699999999994	470.1478	0.6432	4.6263	1	--	--	--	65011.0	1	-	-	1825.28	2520.34	33458.13	11112.32	12292.74	767.07	1094.97	855.4	3377.8	1645.45	434937.72	178132.77	304977.19	112348.28	61298.7	98537.9	60808.71	85054.68	262004.59	185944.35	1.2683642989008703	0.001666902673025839	25.87466029485348	4.693468016662711	up
MW788	BQ 518	C32H38N6O7S	671.2269	650.2523	0.6432	4.2197	1	--	--	C11589	--	1	-	-	2697.48	1163.69	736.97	2792.06	2099.24	5857.8	3122.31	4711.81	4006.26	634.16	13725.65	20072.12	7304.72	15191.38	22064.28	20167.07	19722.77	18661.9	8006.66	12722.79	1.5506875501978408	1.3441909430326927e-05	5.666040778124188	2.502340984735045	up
MW5	(-)-Acanthocarpan	C17H12O7	655.1092	328.0583	0.6431	1.254	1	70285-12-0	--	C10198	--	1	-	-	4996.28	6147.62	7133.94	3742.42	4377.76	4285.09	3419.65	3892.35	4042.22	11587.14	6793.41	13170.22	4232.89	16904.35	23537.17	12181.85	16260.49	11060.85	19532.56	9537.83	1.2047048013906567	0.001900613538537727	2.484157325937207	1.312756544799117	up
MW7558	Glu Asn Val Glu	C19H31N5O10	490.2143	489.2071	0.6431	1.526	1	--	--	--	132223.0	1	-	-	89234.14	6152.67	36951.89	82512.96	77808.37	80782.86	90215.22	54197.56	47053.36	18421.87	26058.04	23430.08	23891.01	21864.99	21906.58	28185.74	21983.57	27086.62	439.68	25284.12	1.1464903131044881	0.004326302018888122	0.3773680255923354	-1.4059559063782234	down
MW684	Asp Arg Val Lys Asp	C25H45N9O10	612.3112	631.3289	0.643	0.8116	1	--	--	--	264545.0	1	-	-	34349.79	26158.47	4077.58	33125.02	29830.87	34430.07	35245.76	14718.03	11862.99	32479.06	294.79	6001.14	388.27	4196.34	454.89	1609.95	4216.58	784.65	1223.28	4862.47	1.4882417785035045	9.028289371072008e-05	0.093774704652345	-3.4146573757138197	down
MW7030	Creatine ethyl ester	C6H13N3O2	341.1908	159.1008	0.643	4.9892	1	15366-32-2	--	--	263486.0	1	-	-	56271.06	42627.69	18000.32	61919.69	50366.79	54901.36	52907.25	6118.5	5216.61	68926.54	13566.43	11525.62	7820.98	423.3	8506.57	1792.63	8771.73	581.4	8779.59	9292.1	1.3240615903295243	0.0010544853727763703	0.1703040396249965	-2.5538154386270477	down
MW508	Acrinathrin	C26H21F6NO5	524.1002	541.1324	0.643	1.1288	1	101007061	--	C18408	--	1	-	-	69279.46	78732.46	23306.04	114140.51	69897.36	66170.56	73178.83	39935.35	42481.22	46213.97	2655.74	2102.16	5406.8	5934.7	2534.29	20762.47	2526.67	9777.3	7459.24	9559.14	1.4848248759892129	5.6354704278215183e-05	0.11024316974851564	-3.18123882028548	down
MW429	5,6-Dihydroxy-3-methyl-2-oxo-1,2-dihydroquinoline	C10H9NO3	381.10900000000004	191.0582	0.643	1.2698	1	--	--	C06725	--	1	-	-	17043.68	93666.79	19378.03	31700.67	28609.06	32701.25	21558.93	11219.89	8051.8	81086.07	114795.93	103918.24	90667.27	179539.61	137946.32	42554.0	90768.23	25234.73	96399.28	33640.54	1.051437783285873	0.005909143321720807	2.653394911896448	1.4078394117274506	up
MW8234	Methylazoxymethanol;CH3-N(O)=N-CH2OH	C2H6N2O2	132.0766	90.0429	0.6429	0.8240000000000001	1	590-96-5	--	C02390	--	1	-	-	92360.1	166926.46	169378.72	82477.64	82817.69	72258.01	74060.26	78297.35	85170.25	211385.72	143982.53	207769.6	124631.43	253175.26	426211.75	262315.88	401931.39	244482.52	301442.79	285457.1	1.2807234605061226	0.0006035839355549908	2.377655537164114	1.2495397197843554	up
MW8002	Leu Cys His Asp	C19H30N6O7S	525.153	486.1897	0.6429	4.053	1	--	--	--	176001.0	1	-	-	354767.18	421982.33	254743.78	386044.25	336534.27	373883.79	412769.3	391037.27	316023.48	510090.3	86831.96	62501.07	28016.52	66083.41	24335.87	29845.62	21991.94	28048.31	3253.26	6812.17	1.710151896080926	6.697136398215039e-09	0.0951921071263675	-3.3930142326460553	down
MW7867	Jasmolin II	C22H30O5	397.1985	374.2093	0.6429	4.4767	1	1172-63-0	--	C16781	--	1	-	-	4216.44	1182.28	4490.28	1857.38	451.38	1980.49	1782.8	2531.64	3338.43	2014.68	17511.14	2577.03	15459.03	12356.88	8936.18	19483.43	9863.56	18403.27	1421.04	14479.25	1.3388259062298402	0.0008592122099262597	5.052915398099456	2.3371160248471874	up
MW6544	Astemizole	C28H31FN4O	500.2821	458.2482	0.6429	2.4128	1	--	HMDB0014775	C06832	--	1	-	-	12958.39	227.48	13697.0	7387.15	12071.47	13640.4	7892.43	2541.76	4919.25	694.16	77.56	233.47	106.56	405.87	167.48	67.28	129.67	77.6	187.51	831.47	1.272027234927302	0.0018143850128072442	0.03004715670195868	-5.056627711519135	down
MW9066	S9947;2'-(Benzyloxycarbonylaminomethyl)biphenyl-2-carboxylic acid 2-(2-pyridyl)ethylamide	C29H27N3O3	512.2179	465.2052	0.6429	2.3308	1	--	--	C13771	--	1	-	-	9971.33	307.67	7184.35	11180.85	9205.66	13315.92	11773.22	18146.18	9846.13	799.06	1584.9	405.71	435.94	79.21	147.67	61.43	218.83	165.93	596.06	244.8	1.351427304678413	0.0005969791869273678	0.042957201633439385	-4.5409561750606695	down
MW7246	Difenacoum	C31H24O3	508.1885	444.1725	0.6428	11.7155	1	56073075	--	C16807	--	1	-	-	413.13	528.24	178.91	653.06	250.1	363.13	476.71	324.75	507.5	393.34	1050.5	1809.68	709.38	573.56	1267.0	787.47	886.95	1380.91	2608.3	560.9	1.1590475506233155	0.004719051753145103	2.8454438512351827	1.5086537112421896	up
MW2999	Tyr Leu Met	C20H31N3O5S1	462.1469	425.1984	0.6428	1.2867	1	--	--	--	16784.0	1	-	-	11654.21	17030.0	3616.59	8522.15	11883.02	13811.04	13036.97	3746.1	11711.83	19211.09	1689.69	1327.22	434.48	1810.1	2983.73	538.44	3171.37	3021.47	3116.21	1013.49	1.4373921967804246	0.00017742937738878385	0.1672710399831908	-2.5797404049755337	down
MW480	9-Fluoro-16alpha-hydroxyandrost-4-ene-3,11,17-trione	C19H23FO4	353.157	334.158	0.6428	0.8881	1	--	--	C15105	--	1	-	-	53232.25	86798.41	48354.16	46546.67	50139.58	51626.22	49868.72	73907.54	71231.33	54114.58	132787.41	168737.77	197288.31	126934.54	110164.01	164254.85	118596.78	163437.68	136934.69	130227.91	1.6046693426888328	5.42234301147291e-07	2.4740795568655227	1.3068918925737643	up
MW3064	Verapamil	C27H38N2O4	473.282	454.2832	0.6427	13.2537	1	--	HMDB0001850	C07188	--	1	-	-	38653.84	14180.8	30849.24	33437.97	40796.91	51750.07	44070.75	26490.26	44527.77	37729.0	11298.67	5380.57	12227.43	22177.89	43212.27	10818.96	13476.29	11206.9	14302.06	14317.63	1.2620976142027152	0.00041169615179102964	0.43703316379051904	-1.1941853336495187	down
MW9618	Trp-HoPhe-OH	C27H25N3O6	534.187	487.1743	0.6427	0.7877	1	--	--	--	65352.0	1	-	-	1628.21	11897.54	2797.12	1856.23	1578.21	537.93	1149.83	9843.42	1801.85	10473.38	22670.74	139415.32	32439.25	40238.92	61201.07	21414.95	72617.21	22587.92	16012.62	33977.88	1.095983920558803	0.0063056757794169105	10.618374188430188	3.4084909825127445	up
MW8830	Piperonyl sulfoxide	C18H28O3S	649.359	324.1759	0.6427	4.7669999999999995	1	120627	--	C19147	--	1	-	-	107274.23	66713.1	117940.68	118270.04	84766.55	125625.44	149796.76	841086.69	516489.14	3391.81	1386306.8	464904.31	1795215.61	574203.44	709291.39	811078.1	776399.88	686407.18	1745179.01	703997.09	1.2849527113343846	0.0007708448739733845	4.529036855080753	2.179204279380494	up
MW2969	Trp Gln Gln	C21H28N6O6	459.1996	460.207	0.6426	4.1682	1	--	--	--	17761.0	1	-	-	41102.02	33218.58	37045.46	40251.1	40353.86	40120.41	48984.29	8453.17	11013.45	59189.08	215.55	6964.33	150.5	4682.82	126.14	4964.44	87.1	280.16	6961.42	88.86	1.5234340994833315	6.342842939938328e-05	0.06816563312707019	-3.8748116266775	down
MW6962	CL(i-14:0/i-14:0/i-12:0/i-21:0)	C70H136O17P2	697.1489999999999	337.0798	0.6426	3.9979	1	--	HMDB0091285	--	--	1	-	-	83720.61	32050.07	52618.45	84650.16	79695.61	89042.41	93130.34	78039.93	72033.48	51803.12	295.67	281.2	840.75	2984.25	4194.96	289.28	221.99	293.86	13306.36	326.87	1.646025947426594	8.863842679027168e-07	0.03213685603384829	-4.959627393500912	down
MW7839	Isoclavulanic acid	C8H9NO5	217.0821	199.0481	0.6425	2.4291	1	62319-53-3	--	C11833	--	1	-	-	265730.87	33857.15	419372.03	221440.48	267478.98	278054.62	209532.93	135997.82	134488.45	19276.21	72508.45	77831.94	64463.96	70350.93	68927.5	66406.7	63658.7	62088.94	67421.18	2309.33	1.131494700172947	0.005959344881146384	0.31027526922655	-1.688379384762877	down
MW1307	Ethylene oxide	C2H4O	87.045	44.0262	0.6425	2.9621	1	75-21-8	HMDB31305	C06548	--	1	-	-	178440.22	70126.41	62963.6	179900.08	162861.11	186049.93	199781.35	97505.17	91540.19	111711.85	64579.82	11758.59	20403.04	98117.32	30876.76	46281.05	25082.96	42025.37	49718.06	16489.58	1.3514061496156924	0.00021044581727081116	0.30228848010706644	-1.7260020944499666	down
MW7276	Dinex	C12H14N2O5	555.17	266.0903	0.6425	0.7794	1	131895	--	C19038	--	1	-	-	157603.0	464684.2	168736.6	148435.54	128448.79	149628.9	145879.26	149848.09	151223.63	272506.64	1211536.76	1945936.5	738016.62	1480205.42	1594821.3	786165.04	1585023.46	815382.86	709012.78	831542.17	1.4793358772852812	5.844003447069211e-05	6.039068259687759	2.5943259798783176	up
MW2189	PE-NMe(15:0/22:1(13Z))	C43H84NO8P	810.5419	773.5935	0.6425	13.2222	1	--	HMDB0113032	--	--	1	-	-	7305.54	263.39	96.69	10786.78	246.74	15101.34	15858.87	26584.49	22132.68	23670.95	296.03	257.15	79.5	206.25	755.89	115.02	1003.33	980.08	290.03	3239.01	1.1493287352319614	0.0057478330023051855	0.05917607304764285	-4.078842227995619	down
MW9491	Thr-Leu-OH	C16H22N2O7	372.1767	354.1427	0.6424	4.4444	1	--	--	--	65228.0	1	-	-	13571.64	9435.09	7948.05	13271.55	12855.32	13119.08	15571.23	2176.88	1332.21	14157.51	2062.97	1328.61	699.65	554.86	148.13	161.5	779.26	224.32	371.57	103.79	1.4700875882377968	0.00017249266724884244	0.06220755586698036	-4.0067663658533	down
MW9396	TG(i-20:0/19:0/20:0)	C62H120O6	594.1584	530.1424	0.6424	12.9689	1	--	HMDB0064265	--	--	1	-	-	19995.17	19006.33	42750.93	60944.73	12822.29	39911.55	31727.44	15562.98	17239.93	7212.51	51992.08	58587.4	35998.83	113696.46	54904.01	99420.1	89392.97	45749.8	32025.0	26761.92	1.0684539094956582	0.007031003977067676	2.277650103943552	1.1875461350719094	up
MW6366	Allosamidine	C25H42N4O14	661.2328	622.2698	0.6424	4.8106	1	103782-08-7	--	C05346	--	1	-	-	5462.39	7714.02	10292.59	5545.28	3465.07	4542.55	6190.0	60259.77	47276.35	5606.01	195689.18	75629.18	156326.53	134820.6	87699.2	120458.42	46614.1	85042.04	123339.28	100401.94	1.4910724094701675	2.3801168685794253e-05	7.201736149685428	2.8483447444166505	up
MW6969	CL(i-14:0/i-14:0/i-19:0/i-21:0)	C77H150O17P2	612.1298	612.1301	0.6423	0.8219	1	--	HMDB0091482	--	--	1	-	-	4613.77	25300.99	13750.78	8855.79	7555.13	7737.28	9185.6	4452.3	3098.97	10200.21	47446.06	22099.94	17936.92	33146.87	39406.97	28405.8	36116.14	31300.24	52758.13	25849.97	1.4609002408875735	2.773111849377336e-05	3.529964595557062	1.8196537137881277	up
MW1896	Melampodin A	C21H24O9	419.1346	420.142	0.6423	5.0253	1	35852-26-7	--	C09500	--	1	-	-	8085.45	39166.86	25480.35	12159.46	13641.33	18436.54	12871.07	1938.82	9271.79	22779.62	33506.25	20497.49	32161.83	37125.93	40022.6	30657.81	41067.25	32796.26	38296.69	42910.12	1.3070940460932354	0.0002856320662129788	2.130497965315417	1.091190673703056	up
MW8660	PE-NMe2(16:0/24:0)	C47H94NO8P	870.6351	831.6717	0.6423	4.7794	1	--	HMDB0113960	--	--	1	-	-	520.3	2195.3	3728.03	1051.34	3748.36	958.81	581.51	11077.71	7113.22	1890.21	52498.12	42252.56	81109.7	57376.52	36089.93	69431.75	58123.08	72267.12	75270.75	69026.67	1.6814424635150378	2.586701061678375e-07	18.66575748696401	4.222322151640424	up
MW8248	Metrizamide	C18H22I3N3O8	789.8612	788.8541	0.6423	5.5403	1	--	HMDB0015518	D01311	--	1	-	-	33802.38	10346.38	1152.83	25841.51	28070.17	30890.27	33387.95	7946.47	9570.8	9173.88	221.91	766.83	238.32	1649.45	1190.48	333.67	1205.73	256.8	373.44	2315.65	1.2988202196055385	0.0012657442639007483	0.04496877317509106	-4.474932664414791	down
MW7473	Fortimicin FU-10	C12H24N2O9	387.1611	340.1482	0.6423	3.7108	1	--	--	C17971	--	1	-	-	8479.1	391.29	16431.95	7581.49	8846.58	10328.89	4125.36	5066.2	6702.11	354.9	280.04	335.64	200.94	184.28	214.08	636.12	682.44	325.31	277.14	495.66	1.2569048025751752	0.002048988934902721	0.05316590899408809	-4.233354731460265	down
MW375	4-Hydroxy-4-methylglutamate	C6H11NO5	158.0457	177.0637	0.6422	0.9565	1	--	--	C06034	--	1	-	-	59192.73	30065.33	57339.58	75798.15	78927.01	66355.96	73056.9	25451.39	20199.23	53004.75	9906.4	23061.02	9600.76	19564.64	31026.42	27978.02	31622.54	22571.01	3282.09	36825.01	1.2712532621460644	0.0009169215371364203	0.3994095155790781	-1.3240593907604188	down
MW6759	CAY10498	C18H19N6	337.2011	319.1671	0.6422	4.2417	1	863202-33-9	--	--	44978.0	1	-	-	21411.66	16161.64	6629.25	20382.49	16552.25	15288.51	14821.47	6343.78	489.24	2995.02	1826.89	464.12	224.6	181.13	510.97	732.45	441.93	1241.88	294.29	265.79	1.3310912666922128	0.0008098157671735822	0.051076061667733916	-4.291208902625208	down
MW8197	Met Gly Phe	C16H23N3O4S1	336.1375	353.1409	0.6422	2.4118	1	--	--	--	16841.0	1	-	-	15112.63	36.75	5259.37	9971.22	11498.54	14784.58	7281.35	6760.87	5819.76	51.83	113.75	87.13	72.8	66.47	516.64	45.62	539.37	511.87	34.58	85.87	1.2649015037546067	0.001599761759296718	0.027085191487250068	-5.206351899344953	down
MW1045	Conivaptan HCl (Vaprisol)	C32H27ClN4O2	1067.3569	534.1823	0.6421	0.9388	1	168626-94-6	--	D01236	--	1	-	-	3966.93	5515.83	1430.43	4331.4	3178.44	3638.07	1519.27	299.21	825.81	3817.79	33162.7	7651.87	6777.63	14776.96	15118.24	6329.36	18712.43	11350.66	17602.55	4468.58	1.2224760755430382	0.003052774913332517	4.766333206886468	2.2528798116035635	up
MW6112	4,4'-Diaponeurosporenic acid	C30H40O2	882.6393	432.3028	0.6421	4.8423	1	--	--	C16146	--	1	-	-	1300.4	3061.69	3741.84	1307.89	1592.82	1708.18	1549.88	2269.86	3121.82	1273.78	40761.48	8049.16	64885.8	33176.92	41854.53	35688.61	50624.24	31915.85	41525.75	55926.33	1.5669850754448853	2.4798085327429274e-05	19.323661038524172	4.272296546294664	up
MW8188	Met-Phe-OH	C19H20N2O6S	481.0234	404.1042	0.6421	4.0696	1	--	--	--	65003.0	1	-	-	26907.37	21991.04	17609.57	22771.05	21143.43	21791.8	27952.32	20952.2	24554.78	40247.81	24071.15	2404.01	9920.73	5183.6	1177.54	455.73	869.25	1863.12	1753.3	4787.8	1.4902052660512797	5.418708586969858e-06	0.21342687705423896	-2.2281862272946107	down
MW260	2,4-Decadienoyl-CoA	C31H50N7O17P3S	297.1026	281.0834	0.642	3.9216	1	--	HMDB0001168	--	--	1	-	-	41724.54	24175.5	34414.34	45768.12	42387.1	43428.95	62934.47	40656.18	33805.1	16469.2	123880.24	84987.12	165125.41	162022.25	136382.31	217954.87	107868.03	140054.12	125361.64	151489.12	1.5997310050378095	3.4440455122055197e-06	3.668374820323852	1.8751410554530223	up
MW7020	Coproporphyrin I	C36H38N4O8	655.2761	654.269	0.642	0.7877	1	--	HMDB0000643	C05769	--	1	-	-	20199.46	53900.62	2440.56	19246.84	20767.23	18218.28	19481.42	11477.92	14194.8	57653.83	103333.74	75356.19	65471.38	44637.83	138844.42	27471.06	129384.95	28270.22	111373.82	75821.49	1.2240295083370574	0.0014569671145301948	3.3671263050709115	1.7515178394553592	up
MW6440	Arg Arg His	C18H33N11O4	509.3054	467.2717	0.642	4.6179	1	--	--	--	19165.0	1	-	-	852306.42	87103.29	153492.94	859740.18	778900.72	857012.38	890518.72	704230.54	663159.3	84759.99	194729.16	17557.55	88919.8	52290.4	109239.61	78814.3	102392.24	69041.6	123887.07	51778.02	1.2799402495314318	0.0011481424444903597	0.14982568152605144	-2.738643158442604	down
MW9361	TG(a-21:0/i-12:0/12:0)[rac]	C48H92O6	724.1156	660.0996	0.642	4.7842	1	--	HMDB0065159	--	--	1	-	-	2298.58	2225.91	5816.94	1795.63	516.94	1634.77	1439.52	6772.08	3244.12	781.0	50306.42	25545.31	77382.34	62523.49	74790.79	68397.93	49217.97	56445.76	87561.95	93573.3	1.6263908860566183	4.217406046829858e-06	24.344329171676	4.605513841375261	up
MW9039	Rivastigmine tartrate (Exelon)	C18H28N2O8	467.13800000000003	400.1846	0.6419	4.0759	1	--	--	D02558	--	1	-	-	20535.97	26570.68	20516.1	26389.18	31336.9	31471.83	32807.69	26108.75	18635.93	33987.18	4998.93	1572.07	1149.77	2110.59	327.08	1790.61	1191.24	829.02	245.21	3945.04	1.705875498154893	5.341654517675967e-08	0.06766860109402956	-3.885369625603882	down
MW2349	Pro Leu Gly	C13H23N3O4	266.1509	285.1689	0.6419	13.2068	1	33676-42-5	--	--	21515.0	1	-	-	161147.25	527107.75	99142.15	131072.24	180853.31	134064.08	391577.78	275907.82	724169.67	459490.03	76281.16	109133.0	35271.18	383574.57	39358.95	45504.75	63036.02	43387.89	39968.46	55213.44	1.0134367662045765	0.010917373904681286	0.28877294737035125	-1.7919924999015786	down
MW7443	Fenson	C12H9ClO3S	558.9814	267.9961	0.6419	4.7842	1	80-38-6	--	C19030	--	1	-	-	2414.27	9400.66	19942.23	956.37	1838.83	1793.31	3152.98	4391.9	2308.24	4517.82	109860.49	61974.85	145500.48	97677.91	74357.73	68722.79	73558.23	58369.94	228031.68	121220.38	1.4425262862813415	0.00019066734735789318	20.491797066089394	4.356974604597662	up
MW7345	Dyphylline	C10H14N4O4	272.1355	254.1015	0.6419	1.7280000000000002	1	--	HMDB0014789	C07819	--	1	-	-	51788.48	80365.73	73703.37	47581.02	33878.11	54959.58	43842.61	39490.08	41938.98	99158.57	4541.5	11579.54	28509.67	11868.14	7901.18	17904.91	6081.9	10128.62	6620.02	10125.26	1.504897170185712	4.727287291948778e-05	0.20338699820522627	-2.297700639017336	down
MW598	Amitriptyline HCl	C20H24ClN	350.1084	313.1597	0.6419	1.3616	1	--	--	D00809	--	1	-	-	3031.23	1553.64	3655.48	1511.28	3082.17	2720.15	3816.44	3373.15	4014.53	1846.48	44578.75	5935.24	19730.33	25228.02	35028.18	14200.3	58833.2	30404.41	70589.49	11928.68	1.2944776803197742	0.0018932183411071535	11.063156036364845	3.4676911032895488	up
MW6408	Androsterone sulfate	C19H30O5S	758.3965	370.1814	0.6418	4.635	1	--	HMDB0002759	--	--	1	-	-	133106.47	33586.12	37821.07	132922.44	120365.47	134025.92	141756.83	71727.93	67269.83	31815.03	31756.47	16295.81	1550.22	12797.84	1402.78	415.01	654.55	739.09	25249.49	307.52	1.382781312711651	0.00029763018045254213	0.10080613813549227	-3.3103446069620035	down
MW6986	CL(i-14:0/i-17:0/i-16:0/i-24:0)	C80H156O17P2	973.3162	467.1766	0.6417	4.618	1	--	HMDB0092831	--	--	1	-	-	1340.1	1428.1	631.82	4352.66	4719.82	5050.9	3209.81	1102.27	969.15	8245.55	6416.43	3159.46	14513.96	19088.12	42810.07	21666.97	42475.82	8580.17	44364.45	42554.92	1.21951889807606	0.0029151733024340713	7.91075510673368	2.9838154111007924	up
MW701	Asp Phe Val Glu	C23H32N4O9	1015.4263	508.2169	0.6417	4.1617	1	--	--	--	121423.0	1	-	-	28151.73	938.35	17075.79	39216.56	41440.66	36358.7	43981.42	23975.34	20658.61	3658.25	21945.24	1574.82	1172.69	781.22	1189.79	1452.78	1884.57	375.64	962.74	261.99	1.2447704521338727	0.0010436648641247164	0.12370644254510015	-3.0150074580667447	down
MW6049	4-Aminomethylindole	C9H9N2	209.0923	145.0766	0.6416	2.5610000000000004	1	3468-18-6	--	--	44973.0	1	-	-	43451.26	4971.66	8059.75	41860.55	32010.29	37409.58	40196.68	43810.81	38012.4	10391.57	13031.64	4904.31	11101.34	7803.7	6392.26	10708.42	6591.11	9457.24	14493.15	5819.76	1.206190794778791	0.002158301423296386	0.3008347309923509	-1.7329569609237807	down
MW479	9-Fluoro-11beta-hydroxy-16beta-methylandrosta-1,4-diene-3,17-dione	C20H25FO3	313.161	332.1788	0.6416	0.8426	1	3109-01-1	--	C14885	--	1	-	-	136145.48	100963.71	60853.09	78067.44	75433.78	73743.06	77380.95	107522.63	38174.93	132550.28	3326.26	9424.49	4163.45	7026.08	13998.48	5271.93	6981.28	2044.5	1565.76	3239.03	1.5875846906293625	1.312905279753253e-05	0.06475814123490843	-3.948794613486703	down
MW5925	3'-Hydroxyflavone	C15H10O3	283.0344	238.063	0.6415	4.1243	1	70460-18-3	--	C20871	--	1	-	-	20723.64	8226.38	4351.83	23264.32	22016.37	22342.61	27412.21	1603.51	769.31	516.86	3661.38	219.94	2078.01	2363.92	431.1	1913.67	1949.98	370.17	3530.52	2817.98	1.0686393618839336	0.010180374917347305	0.14735278643791708	-2.762653752836337	down
MW6099	4-O-beta-D-Glucosyl-sinapate	C17H22O10	450.1372	386.1213	0.6415	0.7283	1	--	--	C02919	--	1	-	-	33470.47	40458.38	26803.73	44306.61	44307.79	30419.38	35268.34	24142.27	41396.05	44203.22	26892.19	3438.18	16448.2	11207.08	11165.45	12498.6	7925.69	8439.42	8635.64	5283.23	1.5495591603085908	3.0293910243356065e-07	0.30685573161234403	-1.7043675637453968	down
MW5825	2-N,6-N-Bis(2,3-dihydroxybenzoyl)-L-lysine	C20H22N2O8	401.1342	418.1376	0.6414	3.7107	1	--	--	C06446	--	1	-	-	85828.49	463.45	239809.94	77214.1	103214.51	89005.14	72276.32	59387.56	67819.46	47428.19	517.89	3074.6	1407.28	1439.13	923.73	12905.34	4582.14	6600.41	1541.71	2492.38	1.251511492160511	0.0024755694785940532	0.042120873195180576	-4.5693208450231815	down
MW9259	Tetrahydrosarcinapterin;H4SPT;5,6,7,8-Tetrahydrosarcinapterin	C35H52N7O19P	950.2766	905.3056	0.6413	4.8972	1	137360-17-9	--	C18802	--	1	-	-	29310.29	3482.89	3077.04	33955.03	33363.69	26457.36	29859.46	30011.83	24106.69	1559.53	6339.24	3628.42	6805.97	4800.39	953.68	633.16	4204.56	876.9	7263.42	8582.19	1.1915215211273544	0.002702721797076088	0.20488497717370094	-2.2871138897063945	down
MW7145	Deidaclin;NSC 370273	C12H17NO6	565.2007	271.1056	0.6413	4.7919	1	88824-26-4	--	C08329	--	1	-	-	3377.91	3198.37	13082.57	1542.68	1261.58	5234.29	4706.77	4619.58	7842.7	667.41	97084.35	50584.33	88166.48	79292.49	51457.86	69048.92	63729.84	69527.46	157360.72	102554.15	1.5593270325422033	2.3099412625150492e-05	18.20198419374066	4.186023821709093	up
MW2898	Thr Pro Met	C14H25N3O5S1	366.1503	347.1515	0.6413	0.8509	1	--	--	--	15726.0	1	-	-	10628.83	2839.77	21021.32	8948.14	8391.93	1812.82	7185.96	1597.84	815.1	9686.31	42241.79	72123.47	20918.29	4069.38	42732.75	50356.32	38194.64	50458.36	8085.75	14400.27	1.1768558915933058	0.003350495682701042	4.711234721578894	2.2361052112718327	up
MW7966	L-Threonylcarbamoyladenylate;L-Threonylcarbamoyl-AMP;TC-AMP	C15H21N6O11P	606.9754	492.1006	0.6413	3.9591	1	--	--	C20641	--	1	-	-	23057.04	1175.22	96340.35	19541.57	20822.06	21295.87	22652.69	29258.39	23071.42	2388.91	197.53	1254.79	108.47	780.98	604.98	946.4	168.63	542.2	3970.06	112.38	1.039061675694965	0.014705205859308937	0.033460332124926516	-4.9014044242368815	down
MW7582	Glucoiberin	C11H21NO10S3	885.0285	423.0328	0.6412	4.539	1	--	HMDB0038406	--	--	1	-	-	4674.93	7882.37	311.13	3986.87	2717.24	2291.72	4464.01	5108.04	5159.56	3983.11	8069.74	12140.91	10220.97	10102.38	9322.29	1078.09	11119.14	2260.1	11196.66	12005.19	1.0731911986341738	0.004954237336429603	2.156670029655748	1.1088054611553069	up
MW6761	CAY10503	C18H14O3	261.0909	278.0943	0.6411	4.2119	1	--	--	--	64659.0	1	-	-	178487.51	80567.33	117416.62	173404.84	158161.49	175323.17	165826.83	52227.67	52116.77	162414.32	15548.46	547.99	3442.73	1273.96	5108.64	2127.66	3932.05	1659.83	1335.73	2484.68	1.5691361418797316	2.538999103105975e-05	0.028467516404826625	-5.134539556432333	down
MW6753	Castasterone	C28H48O5	506.3839	464.3502	0.6411	4.1146	1	80736-41-0	--	C15794	--	1	-	-	17988.89	85100.23	33895.48	19165.69	13829.28	23561.16	24827.09	41375.12	35276.7	85561.05	1733.3	960.75	1926.96	6583.01	722.1	1486.3	295.41	3682.72	1293.77	468.24	1.282262298524446	0.0018587928224902683	0.050324571117888295	-4.312593217684887	down
MW8704	Pentobarbital sodium	C11H17N2O3.Na	248.1131	248.1137	0.6409999999999999	0.8619	1	57-33-0	--	C07423	--	1	-	-	22529.04	20764.7	13650.27	10508.86	14231.83	15837.38	15172.16	14516.78	10771.12	18037.6	15442.36	26045.21	47911.18	29330.83	35895.09	21675.08	39472.03	20798.77	55192.32	28917.3	1.2070828145026633	0.0023538162164715845	2.0553820305046013	1.0394065702039317	up
MW9764	Wortmannin	C23H24O8	543.0223	428.1471	0.6409	4.065	1	19545-26-7	--	C15181	45282.0	1	-	-	30048.92	29164.6	1547.02	39956.09	29266.85	29668.5	40776.51	29730.34	27396.94	56404.59	25449.73	4780.2	10777.0	7903.55	3888.6	510.76	1277.85	647.36	2139.39	7567.88	1.3644224657842299	0.00019260983656519442	0.20684878817185712	-2.273351589349959	down
MW2496	S-(2-Hydroxyethyl)-N-acetyl-L-cysteine	C7H13NO4S	228.0311	207.0565	0.6409	6.513	1	15060-26-1	METPA1182	C14876	--	1	-	-	24351.52	10130.94	19706.61	25524.22	22299.38	26226.04	26832.5	9372.26	215.45	216.37	246.0	276.72	3714.68	186.76	1853.01	347.94	200.22	3063.85	3583.47	4861.4	1.2691706901257735	0.0017146444977714616	0.11119950115023297	-3.1687777788556115	down
MW2410	PS(22:5(4Z,7Z,10Z,13Z,16Z)/22:5(4Z,7Z,10Z,13Z,16Z))	C50H78NO10P	864.5182	883.5363	0.6409	13.2767	1	--	HMDB0112835	--	--	1	-	-	28683.18	29616.68	27468.86	26075.96	25746.89	23341.82	27833.76	25616.06	25148.66	23066.59	8202.87	9063.97	12825.81	11883.3	10930.35	9245.85	11653.29	9870.36	9364.0	10117.38	1.7303703827305834	1.8743590393273166e-12	0.3928323875166671	-1.3480142156841746	down
MW9054	S-(Formylmethyl)glutathione	C12H19N3O7S	372.0836	349.0944	0.6409	4.0766	1	--	HMDB0060507	C14871	--	1	-	-	16395.61	9130.29	12800.52	14988.65	16111.75	17794.19	14724.3	310.51	474.33	9935.0	2891.85	2519.06	2317.38	2159.47	2083.18	2447.51	2474.93	160.33	419.82	2645.98	1.3146346648608302	0.0012311687847492596	0.17857793647813897	-2.4853742501497704	down
MW9542	Toluene-cis-dihydrodiol;(1S,2R)-3-Methylcyclohexa-3,5-diene-1,2-diol	C7H10O2	144.1021	126.0681	0.6407	3.0421	1	--	--	C04592	--	1	-	-	569063.86	186955.5	92602.66	570963.42	517788.85	593841.32	606766.52	569851.22	517366.62	157705.39	209175.49	153177.97	117063.43	134830.34	101442.68	75963.06	92762.21	71391.62	159107.95	72426.11	1.308878661363039	0.0007371548591069621	0.2709026918162796	-1.8841533659812355	down
MW9189	STROPHANTHIDIN SEMICARBAZIDE	C24H35N3O6	576.1278	461.2526	0.6407	1.284	1	--	--	--	44254.0	1	-	-	41658.77	48906.75	12881.63	35630.22	39736.18	33203.98	33001.88	30805.53	42591.09	2217.07	9848.74	102122.96	44418.56	39247.94	140420.11	121820.28	155031.03	120418.66	81092.17	86605.12	1.1968865099695498	0.0035538564113017906	2.810145209586908	1.4906446812427223	up
MW8778	Phenacemide	C9H10N2O2	254.9932	178.0742	0.6407	3.3216	1	--	HMDB0015253	C07428	--	1	-	-	31924.76	14162.29	15843.3	30084.07	27825.25	26801.79	36961.13	23807.82	21379.82	4401.15	7398.58	3288.08	607.69	307.29	196.96	1635.23	905.33	445.88	839.83	175.15	1.4994758481655852	4.0977764877656015e-05	0.06775559199486705	-3.883516170092872	down
MW5854	2-propenyl glucosinolate	C10H17NO9S2	741.0585	359.0345	0.6407	1.1195	1	3952-98-5	--	C08427	--	1	-	-	36231.18	108332.87	23746.65	42861.98	39597.73	38538.55	39140.8	31714.87	29672.71	99986.7	101893.31	125687.27	131390.73	62107.74	96988.06	134580.3	94747.3	60055.76	128057.13	141412.39	1.265008428032964	0.0003175392581563576	2.198585414468428	1.1365755819643977	up
MW5604	1-Nitro-7-hydroxy-8-glutathionyl-7,8-dihydronaphthalene	C20H24N4O9S	611.0016	496.1264	0.6407	4.6845	1	--	HMDB0060330	C14803	--	1	-	-	4438.54	1432.69	2698.21	580.23	1651.85	3717.86	836.37	4702.54	7773.87	1199.13	109046.67	106756.2	138655.99	21486.7	23253.49	9871.53	26764.02	10682.85	62680.09	88298.05	1.1461568043977854	0.004413620807356813	20.58108992056502	4.3632474804893935	up
MW7035	Cryptolepine	C16H12N2	465.2074	232.1	0.6406	3.8662	1	480-26-2	--	C09142	--	1	-	-	13754.36	1838.89	810.52	9359.22	9022.81	10581.44	11569.94	2706.64	915.74	2857.69	443.26	106.66	524.91	74.34	87.84	63.94	177.33	353.14	1324.74	151.81	1.1817970296790403	0.004038358891872869	0.052161990625579004	-4.260857262482348	down
MW6181	6-(3'-Triphosphoryl-1'-methylglyceryl)-7-methyl-7,8-dihydrobiopterin	C11H20N5O13P3	637.9022	523.0269999999999	0.6406	4.2869	1	--	METPA0768	C06149	--	1	-	-	594.02	207654.67	243401.92	3453.71	2067.75	3277.29	2294.02	242195.35	256186.33	118733.7	1374351.7	1200597.62	895035.0	1094675.09	472159.93	595853.0	483224.05	531860.89	189960.39	450783.03	1.3182613529280325	0.0005624121714142039	6.749494443143657	2.754779444136118	up
MW8536	Orotidine	C10H12N2O8	577.1262	288.0594	0.6406	1.286	1	314-50-1	HMDB0000788	--	5754.0	1	-	-	15357.49	20029.68	8060.76	5253.45	11142.69	7536.73	7110.38	10153.03	19046.59	1237.4	6763.83	39132.55	16232.03	11532.24	58790.81	51216.19	62525.53	48882.34	34959.99	36455.93	1.2484387674257484	0.0021156890099462327	3.492783064991108	1.804377040448048	up
MW9587	Tricamba	C8H5Cl3O3	525.8945	253.9304	0.6406	4.8395	1	2307-49-5	--	C19057	--	1	-	-	1089.51	3906.68	2985.85	3641.59	393.77	396.96	518.87	2639.74	780.28	5949.36	82523.89	16390.1	103776.24	25926.63	45412.51	26923.72	41512.45	38023.35	85541.03	66732.97	1.4009605384679755	0.0003943891196751105	23.887916705712925	4.5782091349774605	up
MW7510	Gatifloxacin	C19H22FN3O4	398.1489	375.1594	0.6406	1.4438	1	--	HMDB0015178	C07661	--	1	-	-	4279.17	5786.63	1512.46	795.81	4000.48	1928.31	1878.38	7678.44	2295.13	14132.28	16690.98	41153.26	18798.05	31851.51	36169.62	17924.34	38856.55	20061.45	7442.29	14131.15	1.3445384747157298	0.0003402441186790745	5.488714657025333	2.4564683395684512	up
MW8619	Paramethasone acetate	C24H31FO6	476.2444	434.2105	0.6405	1.4445	1	1597-82-6	--	C12656	--	1	-	-	23374.61	19891.2	580.18	21255.79	20409.19	20721.56	22766.25	13468.93	13700.23	16488.27	61010.07	80172.77	51993.21	50270.84	81052.94	35434.2	85912.32	34481.46	51108.57	25673.29	1.4036384720594686	0.00020069833365578968	3.2266992887194736	1.6900591325543024	up
MW6774	CAY10654	C17H25ClN2O3	703.3002	340.1554	0.6405	0.8949	1	1298023-69-4	--	--	96451.0	1	-	-	652.78	7745.37	12719.65	1125.1	3478.79	1772.55	473.47	3056.89	717.34	3564.35	58747.29	91831.82	27554.02	29030.61	38368.08	18884.2	36330.98	18280.64	9853.83	7815.15	1.1429908517420715	0.004446762981485445	9.536448604483793	3.2534521032750514	up
MW6185	6-Acetylpicropolin	C24H28O9	460.1729	460.1733	0.6405	0.7773	1	116187-56-5	--	C09055	--	1	-	-	2832.26	5646.52	5052.29	2130.73	1713.34	2627.25	1618.33	481.59	3387.72	6152.17	12744.15	24222.43	9985.99	22766.55	19660.14	12107.0	18875.73	10611.65	12100.38	4613.85	1.3998744144921749	0.00018595385500920692	4.6674336803382825	2.2226295233134334	up
MW8691	Pefloxacin mesylate	C18H24FN3O6S	430.1444	429.13699999999994	0.6404	1.9826	1	--	--	D02307	--	1	-	-	13830.12	149.95	12854.93	17137.32	14734.69	19815.48	15597.92	920.57	434.72	8082.2	3988.41	2416.8	2075.65	265.66	96.98	249.41	836.24	1888.38	92.56	2228.99	1.1941199109151737	0.0041176522196128785	0.13653308921868826	-2.8726774597381546	down
MW8111	Lys Leu Thr Arg	C22H44N8O6	499.3352	516.3384	0.6404	3.8086	1	--	--	--	171413.0	1	-	-	58041.02	96172.95	238922.03	60767.0	67267.95	61708.27	74883.55	51250.17	24328.44	84775.41	347.99	167.46	250.6	3557.46	445.4	5973.04	481.37	1329.47	163.39	216.99	1.2960432592753974	0.001841943574656312	0.01580846421694878	-5.983158972250089	down
MW1789	Leu Ala	C9H18N2O3	183.1137	202.1317	0.6404	4.3857	1	--	--	--	44685.0	1	-	-	75889.18	30856.52	43918.68	68981.09	70424.77	75055.82	84077.52	14489.28	16602.24	66800.39	1841.09	1267.57	482.89	660.8	1467.52	663.94	819.89	1006.17	890.27	96.74	1.5032054272681712	0.00010545297037272466	0.01681037436444596	-5.894504336246705	down
MW9667	Tyr Tyr Thr	C22H27N3O7	522.1042	445.1849	0.6403	4.2939	1	--	--	--	18125.0	1	-	-	752.6	38194.28	513.14	1243.11	469.87	3102.14	543.32	39849.37	55675.84	11857.19	253788.2	226728.19	164463.54	195272.02	101722.55	114075.83	85462.29	86120.04	34821.07	81479.35	1.3459720255987628	0.0004305589747233296	8.829996624197786	3.142412886316092	up
MW8324	N-Acetylanthranilate;2-(Acetylamino)-benzoic acid;N-Acetylanthranilic acid	C9H9NO3	144.0442	179.0582	0.6403	6.5123	1	89-52-1	HMDB32388	C06332	--	1	-	-	32649.83	398.26	28203.55	28717.02	27352.22	31409.73	33908.53	1736.38	1175.41	949.98	166.67	347.69	3711.39	1599.73	202.75	3245.91	184.96	166.89	6574.94	5329.28	1.1135724090990622	0.007643280021037704	0.1154429219675121	-3.1147483735328483	down
MW8288	Mosapride	C21H25ClFN3O3	536.0317	421.1568	0.6403	4.0519	1	--	--	D08236	--	1	-	-	879854.95	974285.8	5514.29	942244.01	815250.23	973332.74	1063123.03	920099.14	840408.82	1304828.69	952121.77	308756.02	596777.62	319977.59	144447.5	173546.71	188624.08	112167.98	197956.62	347799.24	1.2236140297203435	0.0008931938567112498	0.3833234863813804	-1.3833656995459798	down
MW6208	7-Hydroxymethyl-12-methylbenz[a]anthracene sulfate	C20H16O4S	370.1109	352.0769	0.6403	1.0541	1	--	HMDB0060420	C19562	--	1	-	-	11804.37	21809.52	4215.98	9792.82	8588.79	10225.36	10126.0	14695.59	12904.38	22252.47	41018.0	31047.68	29700.82	22638.54	35970.84	30739.15	35625.2	25799.13	27097.03	28310.51	1.5394805167122676	8.861353797983622e-07	2.4359942880322696	1.2845107503882602	up
MW6121	5''-Phosphoribostamycin	C17H35N4O13P	581.2064	534.1938	0.6403	4.7925	1	--	--	C18004	--	1	-	-	1756.82	2212.67	2589.93	500.39	5709.62	2739.62	2048.17	14721.44	9217.25	1445.39	66058.56	22279.18	98636.31	38082.54	29438.75	50951.45	57153.25	34958.27	74720.46	65434.13	1.4973819378758968	7.550406631508771e-05	12.522045210554873	3.646398310045415	up
MW7467	FLUTRIMAZOLE	C22H16F2N2	329.1247	346.1282	0.6403	1.7929	1	119006-77-8	--	D07193	44373.0	1	-	-	45759.39	1598.84	30730.89	43583.22	35096.31	42647.95	47121.13	21758.83	16291.95	23056.05	18229.53	5545.59	7909.75	5642.75	1391.1	1721.33	410.53	1422.14	10416.78	7871.53	1.3521537046153027	0.0004280384936292791	0.19685389528747071	-2.344802834479228	down
MW50	(R)-Acetoin;(R)-2-Acetoin;(R)-3-Hydroxy-2-butanone;(R)-Dimethylketol;(R)-3-Hydroxybutan-2-one	C4H8O2	69.0344	88.0524	0.6402	2.9658	1	53584-56-8	--	C00810	--	1	-	-	30228.97	9811.57	5730.98	29873.69	24271.66	26882.94	29422.85	12668.7	8411.98	15868.05	6460.21	1129.32	1569.98	11846.32	3302.1	6381.13	3822.87	4215.22	8410.6	1766.05	1.2689585164643051	0.0010358900667704304	0.25316274837593705	-1.9818629598173685	down
MW453	6,7-Dimethyl-8-(D-ribityl)lumazine	C13H18N4O6	307.1046	326.1226	0.6402	4.2194	1	5118-16-1	HMDB03826	C04332	--	1	-	-	19450.38	8757.38	964.49	23209.41	12793.28	14875.72	16893.56	16557.83	27495.14	4766.78	55324.22	28646.72	27800.48	23330.06	46139.02	15910.07	40759.93	13890.47	34918.97	18586.38	1.092198089207172	0.006421493393424361	2.09452527946378	1.0666232966355382	up
MW8435	Nemorensine;C(16a)-Homo-21-norsenecionan-11,16a-dione, 12,15-epoxy-1,2,15,20-tetrahydro-, (1alpha,12R,15R)-	C18H27NO5	401.2046	337.1889	0.6402	0.8816	1	50906-96-2	--	C10353	--	1	-	-	2932.29	5175.47	10558.59	1271.39	3257.96	864.26	3421.97	9581.47	9110.31	1653.29	21813.43	31252.68	35383.22	42167.13	35274.45	20064.98	37976.42	20216.71	23106.97	19750.54	1.5648192665353569	3.116830617763422e-06	6.000931064043323	2.5851863569325753	up
MW9126	Ser Thr Thr Ala Val	C19H35N5O9	993.4505	477.2435	0.6402	4.5351	1	--	--	--	264155.0	1	-	-	2905.1	16329.93	7183.7	14429.02	12563.29	12566.9	8354.93	3149.31	7881.21	11004.89	26451.42	18046.47	25378.07	44256.29	39022.17	27177.82	43804.15	22480.25	67645.45	32324.6	1.3808571380551236	0.0003348994647790993	3.5964810205183704	1.8465859906816784	up
MW5613	1-O-Hexadecyl-2-O-(4Z,7Z,10Z,13Z,16Z,19Z-docosahexaenoyl)-sn-glyceryl-3-phosphorylcholine	C46H82NO7P	792.5899	791.5829	0.6401	11.2072	2-search-DB	132213855	HMDB0013409	--	--	1	-	-	23049706.8	109200176.63	116549548.31	101909468.41	76841989.58	35410697.28	32235766.45	56426455.06	87233769.36	23725518.83	6138247.77	10819825.11	10343751.53	8494298.35	9217557.79	9138728.91	8778989.4	7904625.1	9401066.25	11855002.49	1.330796779055987	0.0008155657001827957	0.13898949906400487	-2.846952206331124	down
MW7834	Isoastragaloside II	C43H70O15	849.4605	826.4715	0.6401	4.7509	1	--	--	C17794	--	1	-	-	1648.21	1822.63	5425.9	3061.63	2015.38	5592.24	1246.02	2640.92	1819.27	801.51	34491.01	23270.11	58849.75	36739.88	27347.66	29574.99	33257.39	3870.64	63386.31	55022.39	1.4303208139358108	0.00021249539892583235	14.02984577185218	3.8104272445859446	up
MW3017	UDP-2,4-bis(acetamido)-2,4,6-trideoxy-beta-L-altropyranose;UDP-2,4-diacetamido-2,4,6-trideoxy-beta-L-altrose	C19H30N4O16P2	648.1327	632.1132	0.6401	3.9204	1	--	--	C19971	--	1	-	-	1464.64	632.46	197.34	702.89	947.68	2132.98	1553.0	2087.81	2005.34	397.92	13776.07	4663.52	13974.28	15204.08	16996.98	10953.59	20402.44	6414.04	15301.3	12440.16	1.5736300107255534	2.013804950182324e-05	10.734682058989977	3.42420755681426	up
MW786	Bosentan	C27H29N5O6S	550.1767	551.1839	0.64	1.2624	1	--	HMDB0014699	D07538	--	1	-	-	1485.02	8075.01	4373.26	2442.11	2060.1	1336.88	2164.04	7306.72	594.47	11277.72	80422.92	31411.75	13302.27	39612.5	52721.77	21818.89	27642.08	17903.53	50607.48	14157.05	1.3003750193617565	0.0012627066690137304	8.502917038486617	3.0879578618389227	up
MW670	Asn Glu Thr Glu	C18H29N5O11	472.1683	491.1864	0.64	0.9614	1	--	--	--	193002.0	1	-	-	31903.21	11114.21	14639.43	31906.6	28870.16	28192.59	24738.86	7079.78	8406.14	17848.76	10556.46	6495.23	584.11	4535.85	4796.91	5050.56	4781.52	5770.21	1109.47	1034.39	1.3436012626402352	0.00048383305191462784	0.21844048263080354	-2.1946878454131173	down
MW8559	p-Aminobenzamidine dihydrochloride	C7H9N3.2HCl	207.0326	207.033	0.6399	12.6025	1	2498-50-2	--	C11628	--	1	-	-	4711.27	1843.87	2867.82	4265.12	5595.55	4158.76	3088.54	2487.73	1835.21	1028.12	7646.02	6821.95	7070.32	6180.43	8237.88	12274.65	10504.32	9355.43	4472.37	2958.0	1.3223702857139157	0.0005948026456522504	2.3687784231787288	1.2441432544111088	up
MW7731	Hydroxymethylphosphonate;P-(Hydroxymethyl)-phosphonic acid	CH5O4P	176.0082	111.9925	0.6399	0.8243	1	2617-47-2	--	C06455	--	1	-	-	13912.91	7311.4	6887.0	12948.3	8477.17	15761.16	15370.72	17788.28	15519.02	3807.66	1765.03	1353.94	903.67	518.73	252.55	1058.02	759.53	631.79	629.36	1053.21	1.5126909996729654	4.5784745418395663e-05	0.07578159000377133	-3.7220087798503614	down
MW5692	11-deoxy-11-methylene-PGD2	C21H34O4	373.2349	350.2457	0.6399	3.1128	1	100648-29-1	--	--	36167.0	1	-	-	24330.47	1892.14	28037.74	23587.28	18379.75	23974.5	25302.64	53177.8	50677.22	2160.44	274.91	117.9	9821.16	8483.33	152.83	11292.53	165.07	12979.77	8767.28	10509.91	1.0773256518549437	0.006377548994947864	0.2487464017769085	-2.0072524382809487	down
MW2907	Tiamulin	C28H47NO4S	530.2713	493.3226	0.6398	13.253	1	--	--	C12065	--	1	-	-	15678.1	8651.16	3666.8	13689.74	14907.09	23815.69	29353.41	9333.83	9006.47	15839.04	5190.31	1911.15	1274.4	1488.62	3325.56	803.46	2843.21	679.57	4718.3	2120.11	1.3495998405390186	0.0006942107140961214	0.1691987283985774	-2.563209368864252	down
MW6520	Asp Gln Met	C14H24N4O7S1	434.1702	392.1366	0.6398	10.7593	1	--	--	--	17381.0	1	-	-	4776.82	3635.81	1563.7	2280.4	1949.23	1802.94	2044.97	1581.65	2227.64	1846.23	1680.35	6372.29	3642.36	3474.59	6386.88	2214.49	5493.06	4625.0	10706.94	8617.99	1.034128411908237	0.009690001532687658	2.2444250990852157	1.1663459514633607	up
MW9719	Val Leu Phe	C20H31N3O4	441.2474	377.2315	0.6398	5.0251	1	--	--	--	16183.0	1	-	-	2865.43	3578.47	476.7	380.08	2752.68	1005.18	2408.81	2026.96	2139.69	2670.48	3214.88	6357.14	1295.45	2394.26	11160.68	11880.46	12294.62	12595.6	1265.93	18112.15	1.0643664876489425	0.010438459225237793	3.968147423622767	1.9884656253665656	up
MW2199	PE(16:1(5Z)/16:1(5Z))	C37H70NO8P	703.503	687.4839	0.6398	10.6839	1	--	--	--	46703.0	1	-	-	1631.5	2770.88	17851.6	5187.34	2109.55	2979.46	3936.4	1491.74	545.36	7485.62	16193.07	29477.94	14162.94	30794.94	11715.29	44109.12	15216.13	44911.37	591.66	49063.68	1.1693718592802456	0.00284943340437386	5.571628710497733	2.478099120937877	up
MW9363	TG(a-21:0/i-15:0/i-17:0)[rac]	C56H108O6	561.0955	494.1424	0.6397	4.7863	1	--	HMDB0066122	--	--	1	-	-	41044.19	89641.67	201599.58	29662.35	3309.95	12418.75	5643.23	137480.39	106966.49	48221.8	1268021.93	484910.68	1172807.38	1090240.67	648043.84	779434.63	557401.75	615890.98	1635529.5	1016967.8	1.530021215193983	3.699096316056478e-05	13.712142338537172	3.777382085386518	up
MW7067	Cyclothialidine	C26H35N5O12S	718.1196	641.2003	0.6397	4.8008	1	147214-63-9	--	C12057	--	1	-	-	4894.43	13333.66	26660.35	3851.1	1240.46	1790.93	989.67	4315.92	1140.4	4010.51	134330.25	63803.79	200908.84	177973.27	80003.89	77060.14	81635.11	64427.0	260372.34	170525.27	1.4152055834915505	0.00025879249016102737	21.068520747201035	4.397017118791272	up
MW5664	1,2-Dipentadecanoyl-sn-glycero-3-phosphocholine	C38H76NO8P	706.5379	705.5309	0.6395	4.7711	1	3355279	HMDB0007934	--	--	1	-	-	3593.67	6014.47	13886.7	2130.62	8837.8	1776.03	654.03	57598.47	51874.12	1935.89	159821.53	46021.68	121545.82	125685.4	84918.8	122325.25	95060.68	103138.2	143778.13	134103.61	1.5851350334635546	6.766381681393067e-07	7.662746507459787	2.9378615804666364	up
MW8928	Prostaglandin D2-d9	C20H23D9O5	745.5525	361.2815	0.6394	4.8672	1	--	--	--	96462.0	1	-	-	2006.64	2238.01	21312.39	3291.83	2065.78	2226.77	5262.81	1316.5	2901.49	1620.34	6932.73	28462.38	90325.35	63615.43	14998.78	73415.82	22919.03	46902.42	18244.35	65491.34	1.229783894351082	0.002003766819136713	9.748704188907693	3.285210466608208	up
MW6243	9-Oxo-nonanoic acid	C9H16O3	190.144	172.1099	0.6394	0.8182	1	--	HMDB0094711	C16322	--	1	-	-	62956.2	39521.68	38273.5	66633.23	59618.85	57523.48	58100.78	27107.01	29723.47	43814.72	12127.29	21925.1	21154.91	13842.43	33162.76	14299.08	31560.09	13925.19	26877.49	19966.49	1.3908172425574234	0.00011164132009444456	0.4321384901930776	-1.2104343586655342	down
MW283	20,21,21-Trifluoro-3-methoxy-19-nor-17alpha-pregna-1,3,5(10),20-tetraen-17-ol;17-(Trifluorovinyl)-3-(methyl ether)-17beta-estradiol	C21H25F3O2	731.3543	366.1807	0.6394	5.0423	1	--	--	C15340	--	1	-	-	2381.3	728.06	4408.41	3638.54	4933.86	3522.97	4782.97	3400.78	1784.24	347.84	12152.31	887.92	1267.44	4512.09	13288.75	10053.95	14489.37	8850.96	2967.67	12457.24	1.0364480366793745	0.013574541937316538	2.703992152085421	1.4350909644293153	up
MW7280	Dioncophylline C	C23H25NO3	749.3563	363.1834	0.6393	4.3638	1	--	--	C12337	--	1	-	-	53101.12	75632.46	12022.84	56766.06	58930.49	56204.99	57601.29	8902.13	27214.78	139277.09	1196.31	364.4	3837.69	4421.96	515.49	1335.31	291.42	489.04	305.77	438.99	1.3174056401198495	0.0013727194544655645	0.024184553102176157	-5.369770310797281	down
MW8166	Medazepam	C16H15ClN2	315.0638	270.0924	0.6393	2.7236	1	2898126	--	D01292	--	1	-	-	9541.26	1862.42	2498.37	6902.26	7535.52	7206.52	6572.71	9502.79	11532.29	2915.46	15614.84	34598.4	14258.01	17914.63	25984.77	15491.21	16904.05	22228.46	20561.94	26949.07	1.4558511782209649	2.503505933654813e-05	3.1861155508736236	1.671798590042561	up
MW2082	Nitric acid	HNO3	61.9885	62.9956	0.6393	3.9582	1	7697372	--	C00244	--	1	-	-	568430.0	565303.83	686380.86	590064.58	535968.98	523946.01	507707.69	462304.99	550181.3	475285.94	1585505.97	1887220.86	1349938.61	1189931.44	1337873.11	1852377.11	1241672.13	1430579.8	960990.45	915692.27	1.5634734682744658	1.7458087748787523e-05	2.5160726571640826	1.3311735838296055	up
MW7256	DIHYDROGAMBOGIC ACID	C38H46O8	613.3162	630.3193	0.6393	4.0678	1	--	--	--	43965.0	1	-	-	27166.76	44147.22	1547.32	39893.67	28410.85	22206.25	45780.43	37863.02	32607.35	51394.82	19172.25	10562.01	11023.31	7552.17	4423.96	3113.52	4475.51	1829.45	4203.74	6533.0	1.3944719055856922	0.00021546985754422016	0.2201964493196723	-2.183136889337492	down
MW1382	GalNAca1-3[Fuca1-2]Galb1-4[Fuca1-3]GlcNAcb-Sp	C36H61N5O24	946.363	947.3706	0.6393	1.204	1	--	--	--	85040.0	1	-	-	9353.3	12285.02	502.89	8981.2	8383.64	7935.28	9621.98	1275.94	2512.14	18965.3	1225.98	793.97	610.22	1784.95	190.38	1053.46	1431.9	686.95	621.11	328.26	1.2415313400828858	0.002810773666785266	0.10934028960609618	-3.193102993012375	down
MW9746	Valrubicin	C34H36F3NO13	688.2002	723.2139	0.6392	13.2092	1	--	HMDB0014529	--	--	1	-	-	60497.73	45161.24	34604.82	31507.61	49032.14	68437.67	99346.61	116728.24	152467.55	129930.2	5737.35	24567.24	36041.19	24248.85	17839.36	23796.74	651.28	1613.74	24404.7	60908.51	1.2069722135730347	0.002235518953237556	0.27904672637388445	-1.8414213733221292	down
MW7076	Cys Gly Lys	C11H22N4O4S1	651.2358	306.1362	0.6392	4.7841	1	--	--	--	21672.0	1	-	-	979.34	1961.19	2019.37	715.46	587.44	1674.93	300.02	5313.78	3033.13	892.88	38809.6	13492.85	53658.67	46179.61	27427.32	21770.1	18324.19	21377.39	51538.94	57221.31	1.4669341473083597	0.00011769689095067894	20.014257155183167	4.322956164851054	up
MW7759	Ile Cys Phe Arg	C24H39N7O5S	601.2893	537.2733	0.6391	0.8985	1	--	--	--	159973.0	1	-	-	2765.1	8005.07	6622.9	4525.31	1703.72	3016.94	4279.11	4883.53	5583.59	5750.65	19869.6	9795.52	15799.83	6039.08	18435.54	1845.97	16745.29	2524.4	14812.61	12684.33	1.086833886342789	0.007130457199702527	2.5151131027038405	1.3306232783771288	up
MW8141	Macarpine	C22H18NO6	506.9882	392.1134	0.6391	4.8755	1	23594-80-1	--	C06165	--	1	-	-	462.63	485.9	1690.92	2590.95	5295.76	3158.79	465.54	2314.86	1447.28	6397.37	39480.98	47023.27	27316.83	47177.34	63193.16	47439.32	56955.78	47387.94	33232.23	38367.55	1.6809958477369529	3.0990883148093535e-07	18.41112299465241	4.202505722086015	up
MW115	1,6-Dihydroxy-5-methylcyclohexa-2,4-dienecarboxylate;1,2-Dihydroxy-3-methylcyclohexa-3,5-dienecarboxylate	C8H10O4	151.0399	170.0579	0.639	4.1529	1	--	--	C06720	--	1	-	-	56298.8	1218.48	4588.65	20391.71	60234.3	50703.84	59567.95	31022.04	34086.19	1778.69	2538.65	3522.76	5705.62	4237.3	10342.72	6989.22	9027.64	7711.22	1010.65	7327.44	1.0899321289917159	0.007565392975926114	0.18260371161207745	-2.453212004976414	down
MW8487	Nostoxanthin	C40H56O4	642.4514	600.4179	0.639	4.2939	1	--	--	C16284	--	1	-	-	1583.29	63200.51	936.37	12032.1	953.05	2229.18	724.4	33085.68	48382.83	12969.52	288404.1	273975.99	206140.09	250157.58	121315.32	123660.65	109770.81	117784.68	42453.86	129015.14	1.3870502684835917	0.00023283412213984984	9.441835357379595	3.2390673260722886	up
MW6613	Berberastine	C20H18NO5	705.2445	352.1185	0.6389	0.7794	1	2435-73-6	--	C09360	--	1	-	-	2887.35	12888.1	450.4	1712.89	2020.11	2406.88	1978.77	1456.19	843.17	3677.26	65380.03	53734.59	21009.01	14031.54	23854.09	16693.95	22795.58	18216.11	17458.16	13270.91	1.22192997689304	0.002303997658986745	8.787405280543728	3.1354372334567158	up
MW7058	Cyclohex-2-enone;2-Cyclohexen-1-one	C6H8O	114.0915	96.0575	0.6389	4.2358	1	930-68-7	--	C02395	--	1	-	-	27557.11	25939.53	58308.75	22799.0	26396.47	27460.78	24093.69	31294.62	38382.62	22021.9	55805.53	32736.0	44773.05	30644.37	119241.04	78311.73	117146.49	68618.57	48982.27	78041.11	1.1546731703245423	0.004802577468069039	2.216237480422227	1.1481124813286867	up
MW7718	Hodgkinsine	C33H38N6	582.3314	518.3158	0.6389	4.9752	1	18210-71-4	--	C09211	--	1	-	-	897.49	1264.63	7292.0	811.17	871.14	2375.4	579.3	3750.17	4884.98	1652.2	46444.17	57740.23	76692.77	28764.62	47253.5	52576.79	42080.21	55541.11	23804.64	71616.83	1.5914835721358762	6.749419636837354e-06	20.613051757123497	4.365486206214731	up
MW8723	PG(20:1(11Z)/18:2(9Z,12Z))	C44H81O10P	877.4755	800.5567	0.6389	4.8084	1	--	HMDB0116576	--	--	1	-	-	673.13	5318.23	23233.14	7701.53	4474.52	2349.32	1602.75	9994.25	5473.3	1665.16	85059.59	51783.37	184967.5	87269.08	66249.01	69331.97	80593.4	82428.74	123403.44	118400.2	1.5211577577829076	3.8315167914584555e-05	15.195347451953927	3.9255577583280186	up
MW9480	Thimerosal	C9H10HgO2S	422.9741	384.0108	0.6389	4.1424	1	--	--	D00864	43346.0	1	-	-	13021.41	273.6	820.12	9372.0	11193.6	8865.04	10388.1	5464.19	5702.63	114.35	2225.39	61.88	326.9	64.96	212.37	437.84	121.25	155.72	284.23	179.01	1.193255524283555	0.0029149765342342303	0.06240201646736704	-4.002263540487413	down
MW983	CL(i-14:0/a-17:0/i-15:0/i-19:0)[rac]	C74H144O17P2	325.1599	344.1776	0.6388	0.9395	1	--	HMDB0092755	--	--	1	-	-	133355.41	234752.04	182966.98	121809.44	128780.28	115581.54	120185.45	142086.67	89822.33	171923.82	77561.22	71020.73	935.68	4571.48	811.06	42790.12	1319.43	36980.88	22570.07	850.19	1.540308877899304	1.652367874809504e-06	0.1799884456973447	-2.474023798722255	down
MW7555	Glu Ala Ile	C14H25N3O6	332.1815	331.1743	0.6388	1.3127	1	--	--	--	15701.0	1	-	-	17668.6	4820.48	41528.92	16733.83	18391.05	17588.88	19478.69	1067.44	3700.64	15954.11	221.53	2872.61	2250.09	1848.06	383.15	164.83	222.48	1434.88	4923.5	3118.92	1.2214237757260582	0.003779396879533483	0.11113080108765136	-3.169669364408747	down
MW9213	Tamoxifen	C26H29NO	372.2324	371.2249	0.6388	3.1064	1	--	HMDB0014813	C07108	--	1	-	-	93304.0	24088.58	110316.94	104518.3	95893.76	120149.2	108607.99	206281.19	185272.15	35238.99	645.1	1211.45	76.28	674.55	103.2	11687.79	209.03	14634.13	482.58	18045.22	1.4114284001104245	0.00023734772920668584	0.044081022369241	-4.50369850511408	down
MW9551	trans-2-[(Dimethylamino)methylimino]-5-[2-(5-nitro-2- furyl)-vinyl]-1,3,4-oxadiazole;N,N-dimethyl-N'-(5-(2-(5-nitro-2-furyl)vinyl)-1,3,4-oxadiazol-2-yl)-Formamidine	C11H11N5O4	555.1693	277.0811	0.6388	1.0605	1	25962-77-0	--	C19232	--	1	-	-	9158.57	27904.71	5279.53	4013.94	14253.04	13109.06	7723.74	5356.9	7255.43	74880.55	175267.27	305304.21	94763.39	226741.55	205232.18	93778.04	244615.57	89671.27	117123.62	77359.54	1.3921828110435748	0.00020499386155648693	9.647805993614009	3.270200896576192	up
MW257	2,3,6-Trihydroxypyridine	C5H5NO3	126.0195	127.0269	0.6387	1.6605	1	--	METPA0397	C03458	--	1	-	-	66250.58	33030.73	134580.61	53188.17	133209.14	82339.19	124091.76	16349.72	15998.72	135271.27	311.42	133.07	499.32	1702.92	977.53	767.4	1250.26	294.65	808.61	460.16	1.387710095478915	0.0007130540932731716	0.009071195122598814	-6.78449164748483	down
MW8715	Petromyzonol 24-sulfate;5alpha-Cholan-3alpha,7alpha,12alpha-triol 24-sulfate	C24H42O7S	551.1844	474.2651	0.6387	1.8845	1	--	--	C16259	--	1	-	-	268.04	2416.44	3586.27	162.27	1676.52	274.71	295.25	1350.29	1952.76	2584.25	9038.28	1776.29	9782.69	5909.97	16958.33	19215.82	17047.97	15212.54	13566.17	16321.92	1.477430967898521	0.0001348435908197961	8.569485405167915	3.0992085735673656	up
MW9761	Voriconazole	C16H14F3N5O	721.2196	349.115	0.6387	0.7751	1	--	HMDB0014720	C07622	--	1	-	-	4182.95	4770.51	1742.14	5490.31	1001.76	1170.74	1540.54	1012.23	1323.77	1138.12	59616.91	165155.9	37487.8	45420.99	72274.84	42207.07	71329.62	43727.61	26939.16	28300.57	1.2589701737459338	0.0015988786045213115	25.347995363895286	4.663799751665348	up
MW6171	5alpha-Pregn-2-en-20-one	C21H32O	339.2084	300.2453	0.6387	3.7916	1	--	--	C15420	--	1	-	-	8906.67	748.75	7715.28	9949.44	8405.63	9595.54	10164.75	2159.63	1187.37	11551.62	158.58	66.91	173.69	674.85	326.17	436.15	75.19	259.39	160.47	90.65	1.4081955213906254	0.0004972281805029447	0.03441160775327813	-4.8609608916116125	down
MW8064	Loperamide hydrochloride	C29H34Cl2N2O2	535.1888	512.1997	0.6386	1.4434	1	34552-83-5	--	D00729	--	1	-	-	4145.91	7894.83	719.58	2032.16	3386.76	2056.87	3272.95	725.95	237.15	10998.46	9942.04	21561.24	6489.71	13973.68	18749.69	6029.19	19666.47	7144.63	8907.13	7043.99	1.162385901485938	0.0017868224439960274	3.3692044289048235	1.7524079676759128	up
MW8743	Phaclofen	C9H13ClNO3P	537.0273	249.0322	0.6385	1.2946	1	114012-12-3	--	--	374.0	1	-	-	8621.83	10512.93	1062.18	6162.51	5180.98	6264.81	4952.92	6033.28	9365.61	2016.6	4465.69	23156.93	8829.55	2837.0	24596.03	26747.97	26532.07	27476.09	16613.0	25187.64	1.2214408783626032	0.0025532167355411745	3.0983988838968552	1.6315228867923617	up
MW8483	Norsanguinine	C15H17NO3	304.0922	259.1208	0.6385	2.5610000000000004	1	--	--	C12253	--	1	-	-	18531.0	10455.16	6815.84	19344.41	15016.52	18786.55	21616.42	23727.44	22099.72	4653.21	973.25	1746.6	744.61	3487.29	742.34	1230.34	1318.19	1910.26	103.84	929.06	1.4941459235138008	5.481857886017638e-05	0.08187572428718777	-3.6104204258444534	down
MW8542	OSU03012	C26H19F3N4O	502.1847	460.1511	0.6384	0.8962	1	--	--	--	96406.0	1	-	-	442.07	3557.18	476.88	784.06	467.95	1283.92	1523.72	458.8	912.4	2078.6	19768.51	22324.68	13151.85	14796.49	13475.36	11214.45	12861.16	6260.63	5301.88	5397.91	1.4415122689241568	0.00014361641885625795	10.391897596945663	3.377387214359065	up
MW7903	L-alpha-Amino-gamma-oxalylaminobutyric acid	C6H10N2O5	237.0719	190.05900000000003	0.6384	4.6497	1	66592-71-0	--	C08266	--	1	-	-	36631.06	22657.6	6875.75	38805.08	39772.67	39638.99	35056.86	27620.58	37024.47	10162.63	34619.45	42188.93	96741.28	71761.17	89270.78	135102.71	90929.86	128938.59	87581.8	85918.75	1.4150935763981969	0.00022436507482932568	2.933104372743744	1.5524284094380858	up
MW8972	Puerarin xyloside	C26H28O13	587.1164	548.153	0.6383	3.9994	1	--	--	C17057	--	1	-	-	39809.3	7488.96	18369.53	44496.5	37534.62	40268.77	57790.72	41285.65	33206.72	23285.62	1845.32	842.06	414.28	1738.13	500.42	287.97	135.46	274.61	224.66	152.88	1.5342992971470344	4.119886017842633e-05	0.01867572166081153	-5.742692197557635	down
MW1856	Lys Tyr Arg Arg	C27H47N11O6	637.3906	621.3711	0.6383	10.7919	1	--	--	--	175373.0	1	-	-	4868.4	6504.39	7951.83	3024.88	3484.63	3008.66	4753.09	2411.43	655.91	1060.52	16545.88	13582.87	6746.18	19220.8	8800.89	44873.38	8355.25	28665.98	531.61	22100.85	1.08224929494993	0.00996213266567542	4.491168956206356	2.16709099682157	up
MW7505	Ganglioside GT3 (d18:0/14:0)	C77H136N4O37	456.4049	414.3709	0.6382	10.7506	1	--	HMDB0012053	--	--	1	-	-	161152.25	112289.79	33664.5	298448.02	270519.62	345915.05	179938.92	49754.82	45715.63	210933.26	36127.15	10164.85	10680.29	10169.8	31641.0	23122.44	38412.15	14118.8	25247.12	4587.35	1.2562074968462382	0.0020213936013081493	0.1195733421491068	-3.0640323059870846	down
MW8909	Propamocarb hydrochloride	C9H21N2O2.Cl	224.1286	224.1292	0.6382	3.1023	1	25606-41-1	--	C18421	--	1	-	-	13221.11	673.25	970.77	12623.11	8079.78	12451.72	13294.25	2407.86	2498.39	533.17	431.22	1374.58	1251.81	256.06	228.8	261.94	139.6	575.6	214.41	290.49	1.1005725816172076	0.008057001178169073	0.07526971281317314	-3.73178672280763	down
MW7653	HDBA	C14H13NO5	293.1134	275.0794	0.6381	4.2599	1	125697-93-0	--	--	44870.0	1	-	-	316637.55	122628.55	191105.67	301855.74	293027.85	333406.34	335478.63	113269.2	99071.88	190154.45	21739.08	38926.58	1300.0	5611.73	44911.54	35233.69	41766.29	1237.24	52048.82	50532.09	1.4878606408337665	8.368403281894361e-05	0.1277116085786451	-2.9690384275000814	down
MW8185	Mesoporphyrin IX	C34H38N4O4	633.2428	566.2893	0.6381	4.3526	1	--	HMDB0002379	--	--	1	-	-	6197.06	8956.75	13940.08	1771.5	6584.01	7803.52	789.83	3818.44	1022.57	835.32	97676.03	44838.79	86728.9	71211.28	32155.01	54307.21	38130.48	54618.41	23057.54	40289.97	1.473386735032966	0.00010199891453230334	10.4992900105725	3.392219867268454	up
MW699	Asp Lys Val Lys	C21H40N6O7	487.2884	488.2958	0.6381	13.2402	1	--	--	--	123028.0	1	-	-	8121.52	34253.63	23119.88	49022.27	36462.82	21557.68	18633.84	17664.32	42495.18	24028.1	5598.16	22235.29	14237.29	10802.98	9754.15	12726.13	10820.74	12648.99	14085.55	16382.91	1.1133593855272363	0.005242552111030899	0.4695400452151161	-1.090679890001769	down
MW9649	Tyr Ala Leu	C18H27N3O5	407.2287	365.1951	0.638	2.1254	1	--	--	--	17388.0	1	-	-	211509.34	91397.33	216352.62	226712.76	283689.29	327269.77	120958.4	210741.97	59715.05	174771.96	51673.97	26439.82	3735.95	14725.37	17650.49	16705.51	11104.33	14571.26	12923.95	3105.42	1.4921847396213048	8.036230442500582e-05	0.08976881606499452	-3.4776418218864493	down
MW7005	Cobyrinate;Cobyrinic acid;Cob(II)yrinate;Cob(II)yrinic acid	C45H59CoN4O14	1005.2889	938.336	0.638	4.377	1	--	--	C05773	--	1	-	-	3615.86	48321.03	24402.39	3828.29	12385.44	6641.41	5397.78	48118.75	15803.99	10262.6	29304.23	65518.39	41180.27	65228.35	21783.63	134486.69	20944.72	101785.92	44833.29	28048.7	1.0161557526603169	0.013515058811222551	3.093868446785877	1.6294118537990394	up
MW8836	Plantagoside	C21H22O12	580.9859	466.1111	0.6379	4.7509	1	78708-33-5	--	C17531	--	1	-	-	22466.16	6157.05	32514.68	5243.79	23907.7	17874.15	22898.35	29168.77	11734.31	7637.88	84365.65	35410.16	97840.93	88754.87	83052.73	60486.84	41346.1	64553.52	62243.14	98043.69	1.507574642306579	1.2719690438366327e-05	3.9871175199679465	1.995346129282138	up
MW8445	Neu5Gc2-3Gal1-4GlcNAcSp	C27H45N5O20	801.2993	759.2658	0.6379	4.9543	1	485388-18-9	--	--	3615.0	1	-	-	1374.69	506.37	12640.12	1486.03	3138.62	1994.59	1442.34	526.39	1005.4	1829.11	37029.54	1688.14	47432.82	36694.75	61686.53	48247.24	65429.05	47506.12	59027.57	32312.48	1.5384139294976629	4.8547711191506566e-05	16.846283061063858	4.074358407309097	up
MW700	Asp Phe Glu	C18H23N3O8	390.1305	409.1485	0.6379	4.8759	1	--	--	--	15648.0	1	-	-	50556.38	13942.4	14458.07	48214.71	47091.08	46672.64	49452.79	17789.38	10413.16	29607.74	11283.64	703.61	368.06	2009.6	1857.07	652.35	1010.67	1147.97	270.8	1024.77	1.4121202730854432	0.00027028191741875694	0.06193979951453137	-4.012989476440215	down
MW2548	Ser Trp	C14H17N3O4	581.2363	291.1219	0.6378	10.8663	1	94421-70-2	--	--	23978.0	1	-	-	74777.73	107581.46	11042.06	68383.57	59379.41	109211.61	121711.97	101637.16	67517.38	139038.44	114741.2	5049.06	6319.44	5634.42	4518.0	7441.8	5436.26	5436.87	6890.59	2601.14	1.2696248428314647	0.00040238177887164664	0.19071538259037496	-2.3905068826376543	down
MW2324	Prebetanin	C24H26N2O16S	667.0486	630.1003	0.6378	4.5272	1	13798-16-8	HMDB29411	C08567	--	1	-	-	30765.66	262.97	8406.17	28890.66	28029.78	26554.58	29155.06	8219.65	1261.45	11063.06	5209.37	244.87	251.92	1336.99	412.33	283.3	1772.65	268.47	276.63	3365.56	1.2189666116228317	0.002925914266749572	0.07776006401518716	-3.684826783146424	down
MW7655	Hematoporphyrin	C34H38N4O6	563.265	598.2791	0.6378	12.1958	1	14459-29-1	--	--	5638.0	1	-	-	36069.5	1858.84	22538.51	67523.26	65771.45	75948.97	78280.02	169468.87	89849.62	2857.18	25720.84	10131.28	1718.18	4407.79	1366.55	278.61	975.67	715.12	27475.87	1291.55	1.0749935245859203	0.0076684262616149345	0.12141193263697884	-3.042017875021985	down
MW1948	Methyl oxalate	C4H6O4	99.0085	118.0266	0.6377	0.9118	1	553-90-2	--	C10900	--	1	-	-	36673.7	32545.85	28285.83	40040.28	31964.57	47161.02	42119.18	53223.63	34509.28	24131.42	80670.0	68062.25	68016.96	98050.42	77608.46	144178.18	83321.4	90123.58	120625.95	93579.63	1.5328742930918136	2.241755526035457e-05	2.493524783008318	1.318186541942477	up
MW2357	Pro Thr Val Asn Cys	C21H36N6O8S	553.206	532.2315	0.6376	9.5121	1	--	--	--	264900.0	1	-	-	9402.92	19461.47	1997.3	18147.23	12222.79	27591.82	32121.73	28079.67	18783.67	34131.5	29473.29	222.82	1538.79	2955.14	1354.79	1257.96	228.77	1262.33	458.35	775.35	1.1776281956021302	0.0015564022683061866	0.19573918206438445	-2.352995518729072	down
MW6799	CE(15D3)	C51H86O3	823.5765	746.6577	0.6376	4.1084	1	--	HMDB0112209	--	--	1	-	-	79537.84	54426.13	24260.68	78181.22	79226.19	77023.5	81548.22	92639.67	84257.48	68157.06	132254.62	13665.12	35344.42	24803.8	10764.18	7722.84	6948.52	18264.06	12669.5	17463.5	1.067276384141245	0.005723381879841743	0.3891518257586544	-1.3615949691485023	down
MW8225	Methyl geranate	C11H18O2	249.0838	182.1307	0.6376	2.5563	1	1189-09-9	HMDB0059816	--	265098.0	1	-	-	26282.27	7425.27	9515.65	24479.34	19006.59	28031.46	30880.8	20091.57	19700.36	7446.64	5419.02	3295.82	4575.31	1456.71	4120.61	3718.87	1918.18	2446.37	4450.32	1911.36	1.419178212347182	0.00021519198308074452	0.1727293302730816	-2.5334150146452816	down
MW6554	Austrobailignan 1	C21H18O7	446.1213	382.1053	0.6375	12.6269	1	55955-07-2	--	C10546	--	1	-	-	188636.26	73530.49	89226.68	99373.42	213312.54	179512.03	126616.09	92809.28	68043.24	30294.32	189842.6	202583.48	142392.75	158400.02	277288.88	569337.01	494960.85	496676.72	134659.72	91215.96	1.0017209944555987	0.02043190562334651	2.374260698295916	1.247478354309744	up
MW7732	Hydroxyphenylacetylglycine	C10H11NO4	227.1029	209.0688	0.6375	2.5389	1	--	HMDB0000735	C05596	--	1	-	-	521758.85	223456.98	274006.05	526494.08	473747.71	548881.28	575317.97	343445.34	310846.7	337046.23	121997.82	55808.36	49471.14	77830.74	67116.07	54634.14	67153.89	42875.04	74348.05	37108.24	1.5815874059056954	9.687749220783398e-06	0.15679402742807916	-2.6730574892862853	down
MW8376	N-Succinyl-L-citrulline	C10H17N3O6	573.2125	275.1117	0.6375	4.8309	1	--	--	C18048	--	1	-	-	1371.03	2909.55	4168.13	3088.6	3353.18	1505.6	2883.43	11258.75	7080.4	423.8	52863.93	22825.53	72252.49	57369.12	46843.33	56131.1	28088.42	41388.59	38260.12	66346.93	1.5943039072771457	6.969637954816753e-06	12.679764484272447	3.6644560437930966	up
MW1235	Diphacinone	C23H16O3	359.10900000000004	340.1099	0.6374	1.9724	1	82666	--	D07136	--	1	-	-	9367.38	17997.61	2676.31	9239.19	6490.43	11953.38	10671.03	10900.54	12090.62	18742.91	49729.49	19262.92	46335.77	48930.59	47690.36	63542.49	56594.8	64592.32	38205.95	52462.71	1.6094841553056642	2.645147991678743e-06	4.425225235041686	2.1457508873330364	up
MW1873	Magnocurarine	C19H24NO3	313.1685	314.1756	0.6374	13.232999999999999	1	6801-40-7	--	C16991	--	1	-	-	300066.88	211484.67	212171.38	234528.54	242050.63	262886.14	304553.77	245246.88	250153.36	328804.52	113272.37	115710.59	91238.93	81707.93	90649.0	104158.86	109552.42	82327.05	100400.09	156549.23	1.6645946444412223	3.7157421720682616e-08	0.4033904099041355	-1.3097513087753718	down
MW6463	Arg Thr Asp Arg	C20H38N10O8	529.2839	546.2874	0.6372	4.0687	1	--	--	--	221933.0	1	-	-	30518.51	32618.85	18014.7	27688.38	24200.65	33310.93	36362.64	78496.46	70490.97	56904.22	9099.52	12281.81	9488.38	13286.85	11398.4	6618.02	10093.36	7085.5	8262.2	2305.89	1.3263751814098104	0.0007810310467671553	0.2200649569019137	-2.1839986658274357	down
MW8504	Octamethyltrisiloxane	C8H24O2Si3	473.2239	236.1084	0.6372	2.3398	1	107-51-7	--	C07261	--	1	-	-	20592.65	25740.08	19247.17	19170.69	21109.2	28626.82	29977.44	9349.6	10438.14	49669.54	1095.68	223.4	118.92	267.87	427.87	238.88	1478.12	412.06	120.73	448.21	1.5007148728432376	0.00013547034452586194	0.020655405815279863	-5.597336784776024	down
MW2948	Triclofos	C2H4Cl3O4P	246.8904	227.8913	0.6372	10.5268	1	306-52-5	--	C07165	--	1	-	-	52472.94	67447.36	15859.8	8748.68	10471.91	9916.93	2121.39	5232.1	9929.55	18249.73	29988.64	82914.13	57133.09	45942.96	100711.9	63812.15	128519.9	53603.27	80227.26	60531.84	1.2890239814396045	0.00038574372636790216	3.509023554406653	1.8110696318984203	up
MW582	Alpha-dihydroartemisinin	C15H24O5	300.1815	284.1624	0.6371	6.7292	1	--	HMDB0060593	D07362	--	1	-	-	88902.78	22940.48	48070.27	92806.99	80265.76	92287.81	95548.57	47402.32	39337.54	3729.41	2055.44	4019.47	1596.36	5317.69	37370.69	1782.3	42273.18	1833.77	2527.32	11995.05	1.2539762346002894	0.0008576514275259491	0.18120846123389853	-2.4642777736357293	down
MW386	4-Phospho-L-aspartate;L-4-Aspartyl phosphate	C4H8NO7P	229.0229	213.0038	0.6371	0.7571	1	22138-53-0	HMDB12250	C03082	--	1	-	-	16414.19	14999.43	11807.29	14479.1	12700.11	15322.88	17458.25	12263.41	10378.85	12939.14	22064.88	67148.69	32456.6	34590.28	51112.16	60744.37	52360.33	58536.45	17330.03	36749.37	1.3936401641852028	0.00037610955765672886	3.1211075891098936	1.6420580899069044	up
MW8144	MAG 22:0	C25H50O4	456.4045	414.3709	0.6371	10.3844	1	--	HMDB0032296	--	--	1	-	-	63881.69	45329.98	4554.99	63895.31	59065.46	74417.65	67581.1	67013.67	53072.23	30729.95	14350.89	977.25	3668.77	16538.32	29959.44	11509.9	29512.42	5544.77	6973.95	1718.42	1.3701656036273948	0.0001034279856293022	0.22803502490633276	-2.1326726635767645	down
MW2875	Thifensulfuron-methyl	C12H13N5O6S2	403.0502	387.0307	0.637	4.6929	1	79277273	--	C10957	--	1	-	-	10902.34	8699.11	9352.73	9532.74	10296.96	11618.69	9458.66	19063.52	20257.99	6386.66	3782.54	6990.99	3956.71	6890.75	3147.17	4826.51	4355.69	5405.81	3175.5	3615.63	1.2874303468902548	0.0007441915491957281	0.399303794949182	-1.324441311600728	down
MW1836	LPA 20:2	C23H43O7P	499.223	462.2746	0.637	4.2196	1	--	HMDB0114758	--	--	1	-	-	4448.08	5365.74	25208.45	2970.66	7107.07	10161.72	6605.86	7738.91	3048.03	1189.8	44080.24	22398.17	17069.51	19386.19	28970.1	12468.77	29124.65	11523.72	23551.69	12638.73	1.1875742593891594	0.0014683689521534859	2.995650444069361	1.5828692886733366	up
MW558	Ala Ser Leu Cys Cys	C18H33N5O7S2	514.1808	495.1821	0.637	1.6364	1	--	--	--	264359.0	1	-	-	32698.2	37295.67	37523.14	47286.42	41458.3	62603.04	30473.49	22388.11	10485.83	74676.63	3925.7	2094.12	2992.38	4821.1	19584.12	1201.31	11291.89	1032.9	5202.21	3162.56	1.430898504389449	0.00018942128133476403	0.1393546147418661	-2.843167316665451	down
MW9763	Withanolide D	C28H38O6	547.1857	470.2668	0.6369	4.0367	1	30655-48-2	HMDB03218	C08842	--	1	-	-	91488.79	1204.96	30083.26	90842.32	84444.8	98892.22	97926.27	49003.06	44521.38	1262.01	23342.91	5256.77	157.98	456.42	188.16	9538.9	174.13	88.77	10565.57	12161.78	1.236201300025472	0.001938434442144676	0.1050273672994244	-3.251162790589716	down
MW6496	Asn Asp Gly Val Glu	C20H32N6O11	599.1664	532.2129	0.6369	4.618	1	--	--	--	264747.0	1	-	-	704.72	2960.69	4992.17	1774.54	1381.62	1709.07	1415.12	2983.81	7616.62	685.71	227289.65	82129.6	224972.78	97254.0	18771.71	65741.6	24727.21	37836.01	120146.95	120853.09	1.2373823616701234	0.0022888357439483	38.88498619779462	5.281141321588217	up
MW30	(2R,4R)-tert-butyl 4-(hydroxymethyl)-2-phenylthiazolidine-3-carboxylate	C15H21NO3S	276.1062	295.1242	0.6369	5.0126	1	--	--	--	65471.0	1	-	-	55678.74	37004.9	60150.14	59653.77	57362.7	58956.18	58950.42	15914.68	15968.18	62338.43	1968.95	1011.88	1331.85	648.87	1109.84	4724.58	1195.17	388.42	1299.99	439.47	1.5853196021457483	2.062235681164394e-05	0.02929390117153446	-5.093255855005851	down
MW6844	Chalcomycin	C35H56O14	700.3662	700.367	0.6369	4.065	1	20283-48-1	--	C15678	--	1	-	-	136806.52	164364.86	105814.2	141403.74	117074.79	141151.21	174331.37	134632.06	78150.18	164150.61	30282.27	22857.17	5164.43	16804.01	4483.52	3091.83	6002.58	11372.02	2105.07	1621.14	1.6957050259194308	5.851562507438563e-08	0.07643096235178565	-3.7096989941530825	down
MW8552	Oxine-copper	C18H12CuN2O2	703.0465	351.0195	0.6368	4.3521	1	10380286	--	C18879	--	1	-	-	3214.79	3119.6	15089.02	2866.61	2618.9	1219.71	3678.91	1059.77	895.01	2117.83	142681.61	81103.04	92800.33	111266.8	51736.41	97432.06	55910.81	62122.66	46250.69	62521.95	1.5567094981836394	2.1515938154115492e-05	22.403093632551702	4.485626061999175	up
MW1927	Met Met	C10H20N2O3S2	261.0738	280.0915	0.6368	4.4525	1	--	--	--	23875.0	1	-	-	19539.78	11213.42	11026.15	18753.16	11645.75	21772.15	28586.9	6505.95	3993.28	21571.76	383.85	187.23	3298.92	737.77	729.39	204.6	263.46	2313.04	4165.18	2972.6	1.4375737171668783	0.00026354349705014056	0.098675426869062	-3.3411653345563024	down
MW1850	Lys Leu Asn His Gln	C27H46N10O8	675.2989	638.35	0.6368	4.7926	1	--	--	--	264999.0	1	-	-	233816.16	7522.22	172171.1	184972.69	167934.59	199022.3	111653.81	6857.34	4070.26	2014.91	21197.94	12747.19	34233.67	11723.95	1646.72	24277.14	12431.46	29684.81	755.43	36500.94	1.0265280327782922	0.014250346989599146	0.16990205400488925	-2.5572248010188168	down
MW378	4-Hydroxyprotoasukamycin	C31H34N2O6	549.2408	530.2417	0.6368	1.1955	1	--	--	C21146	--	1	-	-	4603.31	13980.28	5204.78	4049.74	2046.27	3173.94	2740.96	477.57	4667.08	12199.94	42860.02	39904.5	15601.6	17811.02	36175.29	16896.33	30168.34	14362.93	13779.19	9431.78	1.277686542331744	0.0009271435743913576	4.459423071748445	2.1568570766555144	up
MW7383	Epoxymurin A	C35H62O3	531.4774	530.4699	0.6367	4.7614	1	--	HMDB0040920	C08484	--	1	-	-	12487.27	8132.17	12699.73	37621.76	9749.43	25878.19	45993.59	328338.84	175620.85	9346.15	560104.29	166745.36	619897.63	149633.92	219028.51	240191.42	254124.58	201855.2	717667.71	175436.25	1.1518873091729698	0.003889096873448387	4.962973095657791	2.3112046337875034	up
MW5800	2-Hydroxy-6-oxo-6-phenylhexa-2,4-dienoate;2,6-Dioxo-6-phenylhexa-3-enoate	C12H10O4	437.1229	218.0579	0.6367	2.1923	1	--	--	C01273	--	1	-	-	16405.58	76.43	7707.27	18098.52	18242.26	18986.89	17027.49	2426.0	1927.9	216.8	4847.07	55.92	2067.84	2403.4	61.26	3058.44	1894.62	2712.48	2458.89	97.11	1.0223738691450213	0.013104698824266115	0.19440244062362966	-2.3628817635285224	down
MW8304	Myristyltrimethylaminium bromide;Tetradecyltrimethylammonium bromide;MTAB	C17H38N.Br	318.2153	335.2188	0.6367	11.2844	1	1119-97-7	--	C11279	--	1	-	-	3233.06	2158.96	4547.57	2220.93	2595.36	3749.34	6169.67	5125.45	2127.19	3345.71	15266.96	11613.05	10649.68	23021.12	6403.33	2144.35	11706.97	11450.12	11007.85	8463.95	1.2342384090280198	0.0015531291292574846	3.167482771642185	1.6633367723782464	up
MW2981	Tryptophanol	C10H11NO	142.066	161.0841	0.6366	4.5765	1	--	HMDB0003447	C00955	--	1	-	-	3182.13	8292.48	4027.07	1540.18	4886.4	6234.7	3146.62	5660.56	1791.16	6771.51	26870.4	25758.12	17299.26	10166.96	19489.64	10006.8	21424.07	20987.85	22651.5	11562.93	1.4974257736778749	2.8196506519850317e-05	4.089743857231741	2.0320104892615483	up
MW7899	Kylinone	C15H21Br2ClO	476.9183	409.9648	0.6366	4.06	1	72036-07-8	--	C17181	--	1	-	-	43832.38	52104.41	27886.15	41666.39	39741.97	44466.11	45708.45	42967.78	31066.33	69499.85	45601.93	6728.57	30918.15	8088.76	3020.66	3947.91	2981.69	3844.05	3106.47	12383.32	1.4126299981622823	4.3154858301512336e-05	0.2748019307065829	-1.8635359545922383	down
MW7546	Gln Phe His	C20H26N6O5	497.15	430.1965	0.6366	4.3223	1	--	--	--	19334.0	1	-	-	92607.45	27727.65	14893.68	91832.66	79030.59	94335.49	112066.82	3631.69	4923.61	1654.25	15927.52	350.49	8781.76	8198.45	307.23	10932.04	5914.04	11118.34	12602.49	15656.32	1.0214255294292558	0.01439680196227886	0.17177733266917145	-2.541388420479228	down
MW6516	Asp Asp Asp	C12H17N3O10	727.1904	363.0914	0.6366	4.0607	1	--	--	--	22750.0	1	-	-	23076.73	22531.28	883.47	13461.36	21984.22	18464.85	24296.05	21428.83	21866.78	26275.15	18382.62	9160.26	11523.34	4834.62	1228.04	2097.94	1739.46	1481.96	3366.22	8002.99	1.2965973675623004	0.0003116992942664878	0.3182058851265402	-1.6519675767408408	down
MW5782	2-Carboxy-D-arabinitol 1-phosphate;2-Carboxyarabinitol 1-phosphate	C6H13O10P	323.0372	276.0246	0.6366	4.0448	1	106777-19-9	--	C04234	--	1	-	-	12647.01	8624.44	27407.13	16545.16	6550.85	15477.42	10826.03	6083.24	306.44	9919.61	3530.92	2968.21	740.45	1414.71	1775.7	420.99	197.86	1327.4	314.4	665.91	1.2907865405725771	0.0017954401296331921	0.116765991478252	-3.09830794969344	down
MW724	Azatadine	C20H22N2	579.3495	290.1783	0.6365	10.3266	1	--	HMDB0014857	C07774	--	1	-	-	13046.39	14560.54	18579.48	14102.23	11356.64	13434.36	14049.71	3996.57	3062.11	13090.69	40076.4	34614.98	29380.06	56345.44	25045.44	75910.7	24437.01	62597.42	519.81	54740.95	1.2052145730221466	0.002803210499453441	3.3842433084459658	1.758833294010434	up
MW5522	(E)-2-Butenyl-4-methyl-threonine;2-Butenyl-4-methylthreonine	C9H17NO3	188.1279	187.1208	0.6365	0.8226	1	81135-57-1	--	C12029	--	1	-	-	140976.83	73203.78	61454.87	124358.57	131897.83	125230.41	127487.19	65169.27	68826.91	73466.98	1536.36	5222.0	3440.91	3853.56	2652.76	2717.2	4135.74	1347.93	2858.66	2436.32	1.607270522596035	6.84008103663999e-06	0.030442770803557288	-5.0377565154723785	down
MW8216	Methallenestril	C18H22O3	573.3213	286.1569	0.6364	4.8332	1	517-18-0	--	C07621	--	1	-	-	8466.6	7475.38	18149.94	7095.09	9015.37	5745.48	6337.14	44734.67	43848.32	6466.13	151164.81	74681.19	197214.61	90615.9	102359.97	113133.96	69647.45	91054.26	68212.05	127493.7	1.503745945187286	2.599163717725783e-05	6.89982503477313	2.7865597786059446	up
MW7842	Isolychnose;3F-alpha-D-Galactosylraffinose	C24H42O21	713.235	666.2219	0.6363	13.1154	1	546-35-0	--	C03989	--	1	-	-	56455.86	41789.93	91428.65	25508.54	28347.05	54414.18	96110.35	130133.18	132766.22	115511.26	29189.38	7202.34	5288.78	6396.4	1752.03	2889.8	4802.59	5606.14	21496.92	141706.62	1.033987329595703	0.009295888881408709	0.2929983048298278	-1.7710357770680834	down
MW9450	TG(i-22:0/i-18:0/12:0)	C55H106O6	578.1272	514.1111	0.6363	12.6441	1	--	HMDB0067650	--	--	1	-	-	27811.16	4882.54	20133.92	21142.37	10021.84	12807.2	8055.78	7178.77	4682.84	2553.85	16363.23	15370.15	44571.06	47605.31	19528.67	96309.03	95061.35	93008.93	12802.21	7705.41	1.0047012006134264	0.020501878936814457	3.758902784407212	1.9103116037908117	up
MW7665	Heptaethylene glycol	C14H30O8	344.2278	326.1941	0.6362	4.4768	1	--	HMDB0061835	--	--	1	-	-	1589.22	1930.97	10011.2	351.28	636.98	1320.24	917.99	15289.9	11632.24	3022.85	27088.68	15917.68	6710.9	14014.21	17965.47	13105.64	24564.52	26219.54	12401.91	14952.89	1.323441332567594	0.00022992333945013487	3.7030152536664236	1.8887004923514488	up
MW7449	Filiforminol	C15H19BrO2	355.0283	310.0568	0.6362	0.8353	1	62311-76-6	--	C17135	--	1	-	-	9424.94	4524.31	16047.4	8450.26	5793.37	9478.99	9252.88	6265.58	5809.82	4570.56	20319.36	5419.11	15766.54	15333.5	10373.0	21066.31	12113.06	21314.04	25115.56	19723.31	1.2252830786769968	0.001335149593635371	2.0917827614847933	1.0647330307424596	up
MW379	4-Imidazolone-5-acetate;Imidazolone acetate;(5-Hydroxyimidazole)-4-acetate;5-Hydroxy-4-imidazoleacetate	C5H6N2O3	283.0681	142.0378	0.6362	2.583	1	--	--	C05133	--	1	-	-	23682.78	16821.58	24485.72	8345.29	7819.45	25983.68	23541.8	24008.32	24331.77	10785.48	80858.29	53659.01	67839.6	130913.27	90510.37	158677.99	100394.95	158220.42	55765.61	126571.52	1.502526322395034	7.618807397801192e-05	5.39188292754065	2.43078917202234	up
MW5673	1,2,5,6-Tetrahydro-4H-pyrrolo[3,2,1-ij]quinolin-4-one	C11H11NO	240.0372	173.0841	0.6362	2.4181	1	--	HMDB0037113	C18487	--	1	-	-	2993.66	2278.37	916.44	2275.99	2466.38	2954.03	2822.03	10437.34	10949.41	1373.66	20551.43	49160.51	77388.4	35157.22	24178.1	40993.51	26727.05	39137.35	33245.15	88746.58	1.3759203293226279	0.0003357119254023128	11.029008564302961	3.4632312028020955	up
MW2310	ponasterone A	C27H44O6	445.2957	464.3138	0.6361	8.05	1	13408-56-5	--	C08835	57640.0	1	-	-	12655.14	1396.32	4888.88	11082.96	11698.31	13018.06	10300.35	6671.97	8394.08	2531.91	4058.33	1120.01	4311.72	3804.81	2405.21	7219.93	2316.78	5813.48	1054.43	4838.11	1.01844734040047	0.00856021399668201	0.4470439621104	-1.161511382494388	down
MW2518	Scutellarein	C15H10O6	322.9961	286.0477	0.6361	4.1316	1	529-53-3	--	C10184	--	1	-	-	1252.52	2995.48	27655.52	1779.91	2666.42	4211.26	5071.99	4524.27	14803.61	9487.52	11548.98	41132.35	91816.55	58850.98	57093.53	113933.12	57868.5	127011.5	59246.69	42949.58	1.3871095309939192	0.00042767625933643735	8.884689147531514	3.1513213009405074	up
MW8431	NCGC00385450-01!6-[(2S,3R,4S,5S,6R)-6-[[(2R,3R,4S,5R,6R)-3,5-dihydroxy-6-(hydroxymethyl)-4-[(2S,3R,4S,5S,6R)-3,4,5-trihydroxy-6-[[(2R,3R,4S,5S,6R)-3,4,5-trihydroxy-6-(hydroxymethyl)oxan-2-yl]oxymethyl]oxan-2-yl]oxyoxan-2-yl]oxymethyl]-3,4,5-trihydroxyoxan-2-yl]oxy-5-hydroxy-8-methoxy-2-methylbenzo[g]chromen-4-one	C39H52O25	921.2875	920.2798	0.6361	4.8627	1	--	--	C17674	--	1	-	-	16814.12	4406.58	29063.22	18471.78	19442.14	23993.69	23890.87	19093.85	16195.31	2667.0	6287.37	251.95	4532.16	3393.81	558.76	443.99	2068.87	470.29	4920.91	559.59	1.40759933345007	0.00021840382389767105	0.1349568739249509	-2.8894296336448284	down
MW1427	Glu Asp Ile	C15H25N3O8	356.1461	375.1642	0.6361	4.7016	1	--	--	--	18064.0	1	-	-	115998.8	46700.58	88621.59	115774.73	82038.57	91629.18	92369.84	54595.77	64896.59	132393.51	36032.52	13587.39	10222.46	31172.04	18323.91	30453.81	24836.3	25329.86	7758.15	22639.27	1.5373459605559088	1.7971818822612695e-05	0.24898411238916004	-2.0058744076488075	down
MW8938	Protorifamycin I	C35H45NO10	662.2939	639.3043	0.636	5.0092	1	69239-55-0	HMDB39057	C12246	--	1	-	-	19627.68	990.14	1919.15	24010.85	23144.39	20895.14	19792.36	8809.15	10035.45	2482.13	95.31	1029.5	74.21	190.42	1072.13	1280.67	251.3	215.28	3800.79	3414.22	1.2087969927109907	0.002677562876438781	0.08673706464163787	-3.527207569476741	down
MW7192	DG(8:0/i-14:0/0:0)	C25H48O5	585.1022	562.1132	0.636	4.8386	1	--	HMDB0092915	--	--	1	-	-	632.67	1537.82	4147.43	583.09	920.34	1226.14	2670.46	4780.58	5630.56	455.34	45261.21	23647.29	74462.68	45503.12	54453.67	48103.79	45376.43	54060.54	70875.2	55774.53	1.6605101994702491	1.333048425787284e-06	22.914833803642594	4.518209917080926	up
MW1607	Ile Glu Val His Gly	C24H39N7O8	574.261	553.286	0.6359	4.6436	1	--	--	--	264397.0	1	-	-	6951.13	838.99	2020.53	6733.55	7341.86	8067.66	11942.39	8096.43	7928.77	1003.22	2029.23	87.69	1042.62	676.47	1688.99	1575.55	2071.72	1227.9	1646.98	352.82	1.2179187167033791	0.002111315188169569	0.2035300067148651	-2.296686586158101	down
MW6417	ANTIMYCIN A (A1 shown)	C27H38N2O9	649.1324	534.2577	0.6359	4.7675	1	--	--	--	44177.0	1	-	-	110889.07	41329.61	119189.32	95414.2	77588.36	119947.08	141632.92	807692.36	517356.62	22128.67	1583756.72	540000.63	2026125.64	669679.55	771635.86	888296.45	856551.73	768079.02	2047399.98	746119.57	1.3083100470283224	0.0006964368405960941	5.3077215480557225	2.4080926865000367	up
MW5675	1,3-Benzenedisulfonic acid, 4-[2-[4-formyl-5-hydroxy-6-methyl-3-[(phosphonooxy)methyl]-2-pyridinyl]diazenyl]-	C14H14N3O12PS2	574.9912	510.9757	0.6359	4.6263	1	149017-66-3	--	C13745	--	1	-	-	663.56	2392.38	19533.41	611.46	16769.39	1175.92	1644.61	49781.54	2728.02	908.06	540266.97	241397.69	397091.89	101396.18	58824.7	92609.29	64152.91	84417.1	384089.69	189917.29	1.1778670382915672	0.0040535625559702014	22.39061069023635	4.484821972240914	up
MW7283	Diphenyleneiodonium Chloride	C12H8ClI	650.8609	313.9359	0.6358	4.8001	1	4673-26-1	--	--	62974.0	1	-	-	5476.75	9395.2	15761.7	3386.09	4179.97	2761.68	2311.79	22684.27	10972.48	1478.31	108826.67	67849.79	121073.03	130254.26	89061.65	77826.01	95462.79	83813.98	171422.24	93199.36	1.6295028110987135	2.1896532975577588e-06	13.248477200865624	3.7277546386376117	up
MW5942	3-bromo-7-Nitroindazole	C7H4BrN3O2	499.9315	240.9487	0.6358	1.1207	1	74209-34-0	--	--	64872.0	1	-	-	9662.37	6211.1	10179.89	12087.49	7516.64	7860.6	9038.18	6674.17	6758.41	3514.34	2066.38	24780.15	16395.92	20148.12	13661.55	53704.8	13389.44	26529.01	20321.32	39309.21	1.0780632624012834	0.00952473389812352	2.89681332283648	1.5344667170917103	up
MW8210	Met Val Ile	C16H31N3O4S1	723.414	361.2035	0.6358	4.7444	1	--	--	--	15908.0	1	-	-	1760.69	4019.21	1651.44	1102.7	1044.28	650.1	5380.61	9776.7	4944.56	3522.83	93127.74	149028.42	96001.37	120502.81	131216.38	92016.35	156746.84	100738.16	158548.49	196603.0	1.6439651305140746	1.1969651968702587e-06	38.23959386904368	5.256995295867424	up
MW1539	His Ala Gln Lys	C20H34N8O6	519.2090000000001	482.2601	0.6358	4.4334	1	--	--	--	151747.0	1	-	-	13319.5	12079.17	14183.51	14764.08	13621.03	15454.61	14430.46	2420.71	2137.51	19996.55	272.44	366.83	579.92	296.2	312.57	1740.65	225.62	2163.31	313.23	148.13	1.5041507348406475	0.00010358436897926708	0.05243893881018205	-4.2532176992718576	down
MW8456	Nicotinamide riboside	C11H15N2O5	255.0978	255.0981	0.6358	0.8052	1	--	HMDB0000855	C03150	--	1	-	-	1853.41	7988.13	3515.41	1705.19	1321.18	451.5	629.75	2338.23	1911.32	2010.12	679.58	62758.51	46613.53	25160.64	29370.67	46693.04	34175.33	57618.78	2339.34	20054.08	1.2756971650494626	0.0015159682925159324	13.718605949020915	3.7780619807263	up
MW2807	TG(i-20:0/i-13:0/i-13:0)	C49H94O6	437.1068	416.1319	0.6358	4.6167	1	--	HMDB0064086	--	--	1	-	-	10792.14	10130.6	6221.77	9181.83	19749.31	21007.65	13375.71	15660.27	20884.75	23397.39	18536.23	32169.12	25479.76	40838.46	32775.24	23811.57	37729.3	33165.74	31804.2	41471.08	1.3934490769743244	3.225615056517393e-05	2.112883641657106	1.0792133189876971	up
MW7191	DG(8:0/i-13:0/0:0)	C24H46O5	636.1041	671.1183	0.6356	4.7842	1	--	HMDB0092909	--	--	1	-	-	2059.0	4816.74	5461.19	2210.29	5798.71	1226.16	4521.79	17554.46	9780.48	2059.1	83379.63	29501.65	24940.37	57976.12	31975.48	48844.69	54688.1	53697.21	79494.08	90751.6	1.5007624530366954	5.987401972786687e-05	10.00666325210965	3.3228890788364684	up
MW5514	(5-Phenyl-1,2,4-triazol-3-yl)urea;3-Phenyl-5-ureido-1,2,4-triazole	C9H9N5O	250.0937	203.0807	0.6356	2.0496	1	--	--	C15383	--	1	-	-	33154.58	43366.21	14887.94	40486.88	36240.7	36404.42	41602.94	63131.06	51118.58	20526.99	672871.46	279991.58	375333.64	159950.82	290877.74	297804.42	278739.73	260208.04	513649.73	413277.53	1.508589428246312	7.718764963542449e-05	9.300383019755053	3.217290132276851	up
MW9511	Thr Lys Pro Arg	C21H40N8O6	1023.6039	500.3071	0.6355	4.4932	1	--	--	--	234933.0	1	-	-	8089.72	5226.39	3664.27	4103.5	7072.91	5185.03	7596.61	13760.37	14152.52	6338.49	38174.52	36030.42	28182.26	25406.1	32025.89	35884.32	27531.42	24401.97	26153.79	27087.22	1.6717958908323483	2.8193964159049483e-09	4.00157827237494	2.0005691291594028	up
MW8438	Neosurugatoxin	C30H34BrN5O15	801.1578	783.1235	0.6355	4.9586	1	80680-43-9	HMDB30173	C16761	--	1	-	-	390.82	1001.12	563.18	997.82	943.09	1568.47	1009.61	3227.94	2458.38	386.09	14506.5	622.11	30529.71	10125.8	32479.58	20111.45	41800.09	25136.79	32095.46	17676.97	1.4289292020172175	0.00038925656294574784	17.9399913282727	4.165107287783277	up
MW7880	Kandelin A-1;Cinchonain-1a-(4beta->8)-catechin	C39H32O15	723.1711	740.1741	0.6355	4.7426	1	88903-77-9	--	C10233	--	1	-	-	4129.7	6109.97	5062.97	15740.45	2590.18	8543.72	1697.3	23883.31	14821.47	1635.65	220824.33	431982.7	98287.01	187564.82	393067.37	222174.04	468186.81	231516.67	296453.22	168131.06	1.5072523504026678	7.552200727141123e-05	32.2768754678517	5.012429021544801	up
MW6123	5'-Adenylyl sulfate (APS)	C10H14N5O10PS	471.9914	427.0199	0.6355	4.7868	1	485-84-7	--	--	3531.0	1	-	-	1998.03	2366.27	996.58	4226.45	2329.14	1018.15	5406.46	111785.36	63114.8	74336.97	469763.54	91735.57	704286.6	200042.66	149131.09	231702.51	165177.13	132348.53	698018.24	211587.71	1.182408865197248	0.004183322532663985	11.412713987435675	3.5125700057621843	up
MW5495	(+/-)-6-Hydroxy-3-oxo-alpha-ionone	C13H18O3	286.1416	222.1256	0.6355	4.1321	1	--	HMDB36819	C04223	--	1	-	-	48063.06	3015.23	64381.1	53645.33	41096.43	41631.78	58939.8	7268.5	7626.14	9960.49	4071.94	2410.87	6863.59	6225.87	3364.47	6089.15	2460.52	2519.84	2284.99	2330.61	1.2148473136157656	0.003527579129439013	0.11507343281931365	-3.1193733002004302	down
MW7051	Cyclic adenosine diphosphate ribose	C15H21N5O13P2	559.0947	541.0611	0.6355	4.7842	1	119340-53-3	--	C13050	--	1	-	-	3266.11	2394.97	4197.38	405.68	522.15	2964.23	531.35	1287.21	6114.75	1427.21	62742.87	20106.52	75183.76	48220.48	27049.7	44836.27	35592.81	38690.85	56583.76	52607.87	1.5835516137524783	1.4232748129560745e-05	19.97378265971588	4.320035672918766	up
MW8289	Mosesin 4	C35H60O10	717.3380000000001	640.4186	0.6354	3.9796	1	101691-14-9	--	C17024	--	1	-	-	60883.62	9452.78	9094.88	61333.07	51278.35	63411.7	56550.74	18919.67	9543.57	31584.81	9945.36	1409.15	2728.34	2504.92	938.66	2677.49	563.36	4843.9	544.7	204.07	1.2983053390720343	0.0012637239091986155	0.07084995024501738	-3.8190893497759886	down
MW8768	Phe Ser Lys	C18H28N4O5	380.2053	380.20599999999996	0.6354	4.6352	1	--	--	--	22881.0	1	-	-	19130.66	3548.85	1326.61	18533.06	17276.78	22664.27	20508.38	11057.99	10196.05	2169.64	828.75	715.36	456.73	571.74	496.72	665.75	656.43	445.6	746.99	414.89	1.302729150835264	0.0011116668499998894	0.047455512434748236	-4.397280509264695	down
MW9515	Thr Ser Phe	C16H23N3O6	430.07800000000003	353.1587	0.6354	0.9081	1	--	--	--	16360.0	1	-	-	13879.1	15186.45	2926.23	14051.56	14403.69	11941.23	9014.04	2933.32	6798.2	22131.61	428.24	1569.39	3638.29	3728.48	3184.55	3939.83	2518.74	4761.58	6173.49	6904.81	1.1991758634297018	0.0027993803295082607	0.3253190315880141	-1.6200728704963168	down
MW9472	Thiabendazole	C10H7N3S	265.0521	201.0361	0.6353	2.5527	1	--	HMDB0014868	C07131	--	1	-	-	21616.56	4052.33	6401.76	21356.25	17129.49	25625.26	20802.1	15826.52	6383.05	4191.62	6241.47	3396.41	4861.58	4314.08	504.17	4399.69	823.3	4418.24	4472.14	5106.17	1.1962094283147189	0.002973827391265947	0.2687677659871392	-1.89556797254098	down
MW8659	PE-NMe2(16:0/22:6(4Z,7Z,10Z,13Z,16Z,19Z))	C45H78NO8P	830.5101	791.5465	0.6353	4.9744	1	--	HMDB0113959	--	--	1	-	-	17329.95	17017.9	3077.88	10646.85	12815.67	14899.85	17899.9	18947.02	15262.33	15388.61	34773.76	37533.68	18254.13	15415.45	32308.0	35610.61	42313.4	36201.46	22386.99	15667.1	1.2742056748356956	0.0010999181180645033	2.0271670720564665	1.0194649956101742	up
MW2084	Nitrovin;Difurazone	C14H12N6O6	381.0563	360.0818	0.6353	3.9207	1	804-36-4	--	C19487	--	1	-	-	23627.22	28405.89	4775.85	22968.42	29329.23	16690.68	24154.6	17320.35	28508.96	14843.19	86044.06	48221.14	91723.52	83282.5	107642.6	61330.81	92001.53	91789.41	89638.74	84610.08	1.6625676012175354	1.1696590281303492e-07	3.970501184596903	1.9893211259818249	up
MW9590	Trichloroethylene	C2HCl3	193.9304	129.9144	0.6353	1.6269	1	--	HMDB0029593	C06790	--	1	-	-	69029.77	60623.33	111350.39	71795.81	77888.97	51171.16	45080.08	24290.1	49810.26	137192.81	39326.56	109514.23	109556.63	113745.1	284137.93	121444.43	235222.65	140507.71	121338.36	134894.83	1.0040346536212978	0.011808395664775113	2.0189379133614884	1.0135965454080005	up
MW2825	TG(i-21:0/18:0/i-16:0)	C58H112O6	480.1071	461.1084	0.6352	4.3605	1	--	HMDB0066413	--	--	1	-	-	2698.06	3716.54	6533.62	3478.27	5719.49	4388.01	2987.2	8421.57	6624.44	5473.84	6903.37	11816.84	13654.39	11368.55	14184.1	11445.59	6694.52	13239.99	14888.6	9363.06	1.437384091016654	2.908458779996761e-05	2.2693175441597537	1.1822584985346525	up
MW9169	Spirodiclofen	C21H24Cl2O4	838.2438	410.1052	0.6352	4.3841	1	148477-71-8	--	C18553	72358.0	1	-	-	5140.67	19577.13	17852.6	3902.74	3726.67	4519.09	4522.98	34763.37	16752.72	12516.28	24477.66	37839.26	24501.85	59022.74	11684.19	87855.28	18580.75	67740.93	40123.62	20672.88	1.085188174121107	0.008013050402113106	3.1839509062111513	1.6708180909344017	up
MW45	(N-Sulfoindol-3-yl)methylglucosinolate	C16H20N2O12S3	544.0368	528.0178	0.6352	1.4129	1	29702-28-1	--	C08428	--	1	-	-	30327.19	19329.98	19848.69	27049.46	25592.12	18344.01	22202.62	26892.34	10705.31	7953.44	107143.65	19111.75	36517.85	25065.42	29964.04	47096.02	43758.45	39431.85	63213.78	59437.68	1.0820381116410511	0.009720038413543065	2.2605110726222883	1.1766489844023658	up
MW7165	Desomorphine	C17H21NO2	316.1287	271.1572	0.6351	5.1068	1	427-00-9	--	--	85025.0	1	-	-	16894.9	9904.09	10534.86	16931.26	16051.08	18074.8	16328.02	2877.49	2525.72	14700.48	217.31	277.05	295.07	871.72	556.18	1000.71	232.47	240.64	213.57	171.74	1.5016020426153618	0.0001023769089612936	0.032658002110193096	-4.936419654658345	down
MW6788	CDP-DG(a-13:0/i-20:0)	C45H83N3O15P2	1009.5633	967.5299	0.635	4.783	1	--	HMDB0116076	--	--	1	-	-	3778.07	1380.82	12419.09	4978.04	1460.87	1602.3	1302.25	4706.74	5987.59	3392.2	116482.41	13196.78	97373.43	58884.7	23758.16	36331.68	33843.19	33477.99	161378.76	63476.8	1.2200861627468484	0.0031525500581440985	15.562923499992808	3.960041191379009	up
MW8026	Leu Leu Val Val Ala	C25H47N5O6	531.3868	513.3526	0.6348	4.7675	1	--	--	--	264448.0	1	-	-	65894.12	15566.77	9232.03	49537.57	45211.83	79065.71	79049.09	499075.58	287882.82	24598.41	866852.66	282707.12	998517.85	266865.47	362108.6	360822.14	405243.14	307898.38	1041569.68	293930.73	1.1717997733850063	0.003109620823515613	4.490046942815416	2.166730528220984	up
MW9668	Tyr Tyr Tyr	C27H29N3O7	584.1199	507.2006	0.6348	3.9979	1	7390-78-5	--	--	16919.0	1	-	-	22292.51	6308.69	1376.75	24152.99	16981.19	22133.92	22473.46	14367.84	11056.62	5631.47	860.04	1438.61	240.69	1080.44	228.9	220.77	504.57	234.27	202.28	553.25	1.3840484332776577	0.0004192338212175802	0.037907023136840884	-4.721391024596837	down
MW2529	Ser Asp His Arg	C19H31N9O8	550.1779	513.2296	0.6348	0.826	1	--	--	--	224413.0	1	-	-	110787.61	246961.94	171039.0	94047.73	148798.48	144139.98	91505.8	57590.68	72719.97	219475.62	293451.3	231131.92	214275.78	325977.54	393688.46	256970.95	394476.96	275707.51	315117.09	250311.28	1.4216736973313615	2.1473552235863086e-05	2.174623068115563	1.1207653573353893	up
MW815	Caffeate;Caffeic acid;3,4-Dihydroxycinnamic acid	C9H8O4	179.0352	180.0423	0.6348	4.1536	1	331-39-5	HMDB01964	C01481	--	1	-	-	192850.21	117437.51	39912.03	322908.47	199578.08	178044.53	281283.94	69560.54	76464.63	237428.55	110617.55	7085.59	1200.36	9356.06	106577.73	4985.39	100220.3	8719.95	220930.8	5736.01	1.0184795596187677	0.00801805242545369	0.3354359134862337	-1.5758909353984862	down
MW865	CAY10641	C28H27NO6	472.1763	473.1838	0.6348	4.6365	1	1233706-89-2	--	--	64781.0	1	-	-	68880.17	46032.43	37216.59	78466.95	69001.72	70666.04	80446.88	129930.5	115549.49	60340.17	15431.5	1586.64	3917.97	1816.27	821.23	384.05	579.65	267.93	19096.56	507.58	1.534229956674089	1.5933653315976762e-05	0.058701340093241926	-4.090462750769787	down
MW1669	Isosorbide Mononitrate	C6H9NO6	212.0175	191.043	0.6348	0.9782	1	--	HMDB0015155	C07714	--	1	-	-	92015.91	15111.37	137217.87	86625.04	91606.75	91341.31	98539.2	47584.83	54250.18	27986.5	884.95	22819.5	972.09	855.2	382.27	21373.51	13275.66	19552.56	1569.51	29903.53	1.3796682887208112	0.00035183116152854844	0.1503326727730502	-2.7337695013017322	down
MW8508	Okenone	C41H54O2	543.3982	578.4124	0.6347	4.0652	1	--	--	C16280	--	1	-	-	18167.32	27072.52	17812.3	29280.7	23414.46	25754.62	27693.27	24955.82	17835.16	43990.36	22939.99	3657.35	8840.19	4442.27	2118.01	2826.22	2514.55	614.76	3157.28	4400.41	1.484886507205179	7.373917427622838e-06	0.21685984258009905	-2.205165170850512	down
MW1557	His Ser Ser	C12H19N5O6	310.1154	329.1335	0.6347	4.1534	1	--	--	--	18463.0	1	-	-	29663.01	49338.07	25002.59	24844.45	33128.16	27439.14	36552.23	58208.03	47589.44	29505.13	345284.62	62358.6	216396.85	385560.24	361019.24	640340.32	365590.87	579009.12	308381.64	390534.41	1.5057878331056322	0.00012541792738289442	10.1156292553843	3.3385141622265286	up
MW7059	Cyclohexa-1,5-diene-1-carbonyl-CoA;Cyclohexa-1,5-dienecarbonyl-CoA;S-1,5-Cyclohexadiene-1-carboxylate coenzymeA	C28H42N7O17P3S	950.0767	873.1571	0.6347	4.8994	1	148471-94-7	HMDB12207	C06322	--	1	-	-	20550.45	848.18	994.79	21660.31	17919.91	20296.81	22344.13	16937.06	9152.15	1758.55	5068.05	816.57	3278.99	2451.71	2215.47	317.82	2244.15	1778.31	4237.88	483.46	1.1569584157961932	0.004087746159831379	0.1728220262453464	-2.53264099353275	down
MW228	2-Phenylglycine	C8H9NO2	132.0452	151.0633	0.6347	4.5272	1	2835-06-5	HMDB0002210	--	43382.0	1	-	-	21503.5	376.11	12879.18	27543.29	26303.96	23178.19	25994.39	3793.97	2140.47	745.57	161.87	66.95	229.62	43.2	137.63	78.55	67.29	34.4	186.42	112.03	1.1975385677032142	0.00369766157611213	0.007738963051220962	-7.013644013005807	down
MW2845	TG(i-21:0/i-20:0/i-16:0)	C60H116O6	371.0774	390.0951	0.6346	4.8371	1	--	HMDB0067540	--	--	1	-	-	32313.13	27789.01	9693.93	43832.58	50152.63	39640.73	24288.35	8261.99	13914.63	27160.46	597.42	1645.07	405.65	1088.19	1244.05	568.55	2062.98	773.51	768.75	408.26	1.43515858257627	0.00021980733347855383	0.034515496696161496	-4.856611944201315	down
MW8643	PE-NMe(16:0/16:1(9Z))	C38H74NO8P	721.5488	703.5152	0.6346	4.7842	1	--	HMDB0112949	--	--	1	-	-	2834.65	7259.43	22673.06	3512.73	4556.66	2957.4	2176.97	16917.6	13326.29	6384.03	177041.27	52326.16	190031.23	129392.58	73093.9	85792.16	81939.49	82962.28	234511.88	159064.54	1.4569456940929415	0.00015686527819686578	15.328977944236975	3.9381896037603616	up
MW889	Cellobionate;Cellobionic acid;4-O-beta-D-Glucopyranosyl-D-gluconate	C12H22O12	379.0854	358.1111	0.6346	2.3415	1	--	--	C20888	--	1	-	-	4023.55	17099.27	565.74	2628.71	3160.62	6311.33	3039.38	17502.5	17972.97	11453.6	38610.99	20470.52	18338.84	29383.56	52458.36	24203.2	68212.72	20025.53	37702.66	25824.25	1.3177853932398054	0.0006717566048077668	4.002387244057768	2.000860759461061	up
MW8705	Pentostatin	C11H16N4O4	286.1512	268.1172	0.6345	1.6768	1	--	HMDB0014692	C02267	--	1	-	-	55853.71	8057.87	62898.17	52315.29	48050.14	81384.44	62050.81	30853.09	39702.79	17717.09	1370.22	656.9	8594.2	4103.48	1888.52	3220.79	332.12	2263.57	5940.51	985.24	1.4568090963724352	0.00016608432975021822	0.06397169738543605	-3.966422426425861	down
MW8093	Lys Gln Asp Lys	C21H39N7O8	518.2931	517.286	0.6345	2.4145	1	--	--	--	172727.0	1	-	-	27523.33	137.14	24120.85	21778.12	24888.48	27112.52	17981.97	13489.59	12214.8	102.73	2686.3	1945.02	170.32	575.04	766.04	797.61	848.68	121.53	110.95	264.83	1.3363859936096387	0.0007834113690117139	0.04893028046785839	-4.353128637467112	down
MW2902	Thr Trp Glu	C20H26N4O7	450.1997	434.1802	0.6345	4.2858	1	--	--	--	15826.0	1	-	-	32414.01	11904.65	9153.28	41152.91	32572.07	36642.21	42223.13	11816.3	14367.85	30389.9	557.99	7982.53	6974.76	4453.47	322.94	141.69	368.22	150.34	167.61	5434.67	1.4276173830210122	0.0002324319941189249	0.10110643117092223	-3.3060533278807944	down
MW7595	Gly Leu Arg Val Phe	C28H46N8O6	635.3256	590.354	0.6344	2.4187	1	--	--	--	264830.0	1	-	-	64796.08	315.11	92859.79	43902.44	55839.07	66023.35	34249.13	25314.52	27403.75	270.17	10907.55	234.97	6989.96	243.42	2434.56	8636.19	365.98	7665.31	308.74	12348.78	1.1837408061462833	0.003833368717113708	0.1219919799677551	-3.035141790058819	down
MW9658	Tyr Ile Lys Lys	C27H46N6O6	589.3114	550.3479	0.6343	4.1141	1	--	--	--	258447.0	1	-	-	32920.85	3700.5	68201.12	36312.47	38583.99	2151.45	38794.01	25236.17	99016.55	1100.38	85458.48	358925.01	113132.1	300857.57	152480.8	119083.18	182615.7	97907.03	155012.43	54572.21	1.191558591219766	0.002291690362930693	4.681972896803568	2.227116582941968	up
MW6473	Arnebinol	C16H20O2	511.2816	244.1463	0.6343	4.2582	1	87064-17-3	--	C09917	--	1	-	-	12371.62	18074.82	2350.84	9689.91	8133.35	8697.57	7035.61	154.38	1107.14	7686.64	158.94	295.97	369.67	408.94	345.39	178.83	321.05	292.7	185.19	498.2	1.248509268290398	0.002237793041475328	0.04056844264711585	-4.623498268754014	down
MW8575	PA(15:0/20:3(5Z,8Z,11Z))	C38H69O8P	729.4447	684.4730000000001	0.6342	5.0886	1	--	HMDB0114820	--	--	1	-	-	40.7	158.24	305.79	46.02	36.1	103.52	147.95	108.02	188.27	82.32	86.11	1590.72	206.55	179.45	1245.53	312.09	1157.58	664.45	1061.83	60.1	1.0084658922835463	0.015123925517383797	5.394237959455352	2.4314191655026756	up
MW5911	2,7,11-Cembratrien-4,6-diol	C20H34O2	421.1311	306.2559	0.6342	0.7796	1	57605-80-8	--	C09072	--	1	-	-	20068.91	10823.64	15566.88	22910.18	21137.86	18409.61	25746.39	22684.36	23967.26	20094.16	17900.95	2545.89	3658.51	2233.38	1120.45	1649.33	1428.06	1635.99	4409.04	3682.94	1.5467488248710826	4.943983993976386e-07	0.1999140555858284	-2.3225481860309194	down
MW9613	Tris(2-methyl-1-aziridinyl)phosphine oxide;Metepa	C9H18N3OP	448.2711	215.1187	0.6341	4.7214	1	57-39-6	--	C19556	--	1	-	-	848.02	10831.95	16286.69	3201.42	3881.02	3126.21	791.56	4510.81	2057.92	11263.6	34832.66	62348.99	40096.48	38364.79	71063.65	42326.95	63639.82	41525.04	45713.96	20876.26	1.5630449350935705	6.708938514640281e-06	8.112589613938225	3.0201625096134963	up
MW7561	Glu Asp Gln Asp	C18H27N5O12	1049.295	505.1656	0.6341	4.0759	1	--	--	--	128542.0	1	-	-	35299.12	51217.74	30705.73	42953.86	38393.31	39890.77	54589.18	46596.98	32126.05	67988.1	5208.35	1294.56	3399.77	824.69	803.08	586.65	508.29	258.81	6169.04	6082.14	1.6718919858181476	6.793304221976087e-07	0.05715693102641881	-4.128927735059526	down
MW6693	Bullatanocin	C37H66O8	639.4828	638.4758	0.6341	4.8432	1	--	HMDB0034739	C08505	--	1	-	-	614.48	1569.06	2122.61	1048.79	475.85	4122.62	1051.23	782.0	1986.73	877.14	76854.32	11519.59	128686.54	112897.86	73028.59	100681.76	63616.29	93684.78	142776.68	144208.3	1.5341504526591845	4.849537685969034e-05	64.70455362987363	6.0157953413874425	up
MW730	BAEOMYCESIC ACID	C19H18O8	395.0747	374.1002	0.6341	3.9706	1	644-66-6	--	--	44070.0	1	-	-	1356.69	886.06	1377.85	1385.89	1355.9	1399.82	1736.17	1641.5	1661.16	251.29	8007.81	3017.49	24212.43	23525.85	24380.5	22371.36	20414.34	18593.25	15755.15	23682.53	1.5426009923783124	4.528385596191406e-05	14.094089714250257	3.817018397404032	up
MW434	6-(2-Hydroxyethyl)-5,6-dihydrosanguinarine	C22H19NO5	358.1082	377.1263	0.6341	2.3337	1	--	--	C12198	--	1	-	-	2105.7	28018.88	20781.03	7210.44	8620.27	8070.01	815.82	25151.01	14967.85	3360.47	64661.75	27950.52	36242.76	25675.89	74635.12	23885.51	77175.62	19420.61	56660.22	22313.41	1.2287995015661541	0.0019808631713359144	3.5987916355027663	1.84751257485808	up
MW1426	Glu Asp Glu	C14H21N3O10	372.1046	391.1227	0.634	1.8527	1	--	--	--	16008.0	1	-	-	68252.88	21182.96	58557.48	57992.93	67338.15	63091.52	71457.51	13550.37	10852.09	69372.61	4733.57	848.39	477.06	1556.59	1242.01	826.16	1682.78	1800.78	3641.35	547.65	1.4846820174257205	0.00015417444515485005	0.03459860838814429	-4.853142178268171	down
MW6293	Acrylic acid	C3H4O2	119.0341	72.0211	0.634	2.0673	1	--	HMDB0031647	C00511	--	1	-	-	21724.03	11218.58	55633.79	3077.18	18854.1	3247.1	9441.2	61320.12	34145.44	30171.18	259401.01	361293.3	133248.43	69252.41	81622.99	56826.52	75740.59	121959.19	92310.32	51744.08	1.0477863627049486	0.009339380909024144	5.2380524554809345	2.3890305073561846	up
MW7	(-)-Neplanocin A	C11H13N5O3	244.0837	263.1018	0.634	1.5278	1	72877-50-0	--	--	96433.0	1	-	-	54617.63	82210.58	38288.8	48211.82	60895.08	47254.14	62261.5	28525.75	31734.12	89402.97	113541.1	144245.55	64701.35	113673.12	169039.7	71575.66	135579.25	121222.18	83421.84	94780.81	1.2895722115060675	0.0003360877668647605	2.045961851584789	1.032779245257955	up
MW9605	Trimetrexate	C19H23N5O3	777.3238	369.1801	0.6339	3.7125	1	--	HMDB0015288	C11154	--	1	-	-	20236.3	17746.31	477.0	13867.64	16698.79	18457.83	16538.56	15502.33	8281.86	26559.55	6065.2	3417.65	4443.96	5971.37	2134.14	1131.52	2524.26	1248.86	7828.0	5951.14	1.3486780796218587	0.0005000033931542034	0.2637631030166778	-1.9226853302139528	down
MW2876	Thiocyanic acid	CHNS	57.9759	58.983000000000004	0.6339	6.513	1	463569	--	C01755	--	1	-	-	65075.47	36203.57	47627.63	61967.08	62963.23	64959.18	66624.69	1726.66	1737.38	39140.5	16619.36	248.25	14316.8	10015.0	10878.59	177.79	176.38	8701.52	15546.47	12972.61	1.2849616685024297	0.0013927268930012152	0.20010644932422247	-2.321160429602063	down
MW8838	PM-Toxin A;(4R,12R,20R,28R)-4,12,20,28-Tetrahydroxy-2,10,18,26-tritriacontanetetrone	C33H60O8	584.4286	584.4288	0.6339	4.8244	1	88212-12-8	--	C08553	--	1	-	-	97513.51	83853.89	418494.01	88934.01	62878.83	76111.46	89808.3	578814.62	328356.65	40874.64	1937136.82	620038.12	2640986.52	721389.02	968531.95	1035042.41	1148216.8	768994.41	2598569.92	971461.26	1.3219323579233124	0.0009087852162968039	7.188079053325574	2.845606275460768	up
MW1816	Lex-lactose	C32H55NO25	410.1611	394.1416	0.6339	13.2228	1	--	HMDB0006696	--	--	1	-	-	3312.87	2167.55	3717.67	1885.19	1661.75	1613.13	1645.47	1714.57	412.35	2567.15	11681.22	18225.84	9370.76	11620.72	9796.69	11226.07	40069.79	11016.37	11890.77	7767.84	1.2299640993748473	0.0027552314979121736	6.892846548167187	2.7850998977093604	up
MW682	Asp-Ser-OH	C12H12N2O9	309.0362	328.0543	0.6339	4.1648	1	--	--	--	65158.0	1	-	-	10527.14	323.8	617.08	10503.43	11000.72	10766.14	10812.6	1141.25	5759.01	8840.18	1062.5	789.15	551.79	3184.84	820.19	1237.85	600.87	275.85	391.34	622.69	1.2307049037830466	0.00244722610115059	0.13567914117455418	-2.8817291518542514	down
MW6354	Albendazole-2-aminosulfone	C10H13N3O2S	281.1064	239.0728	0.6339	2.5925	1	80983-34-2	--	C16627	--	1	-	-	24148.84	10727.38	14651.72	28960.14	25201.39	29158.59	29348.42	16575.52	9469.11	3773.95	2112.69	6390.91	11653.28	5458.7	9328.88	13224.16	9387.87	12870.37	3398.62	8358.71	1.1023762785095241	0.00501634079124865	0.4280090842874512	-1.2242866774259586	down
MW1529	Hexachlorobenzene	C6Cl6	236.8174	281.8131	0.6338	13.2412	1	--	HMDB0032566	C11042	--	1	-	-	39204.95	40251.65	41916.28	36060.54	37370.39	37994.58	31373.81	32101.24	15389.75	32366.82	182873.08	94639.7	104984.63	97526.32	100912.49	90577.49	92346.22	82781.6	86917.8	72879.87	1.5028785754832743	5.0477486526224654e-05	2.9254401382018966	1.5486536973221623	up
MW7462	Flupentixol	C23H25F3N2OS	434.1633	434.164	0.6338	0.7273	1	2709-56-0	--	C11191	--	1	-	-	36054.69	43318.05	14622.58	35814.14	38022.05	42337.89	41642.93	45351.28	27072.75	48853.03	40155.41	4173.91	8258.3	3362.3	1727.21	1575.82	2377.49	4295.08	6287.55	2121.05	1.45577213839367	9.435184404019812e-06	0.19923943696174265	-2.327424855724922	down
MW6739	Caracurine V	C38H40N4O2	585.3221	584.3151	0.6338	4.7839	1	630-87-5	--	C09100	--	1	-	-	9408.46	13507.66	5284.83	3571.29	3849.99	5959.63	10134.11	23723.83	49251.15	7020.01	77284.08	82830.75	239007.73	143990.39	229957.6	130013.81	150238.46	95765.31	152860.89	155669.97	1.5429132718136138	2.1958233809198638e-05	11.066801046776972	3.4681663539620526	up
MW8315	N-1-Desalkylflurazepam	C15H10ClFN2O	306.0807	288.0466	0.6337	1.264	1	2886-65-9	--	--	2913.0	1	-	-	68365.0	1670.97	1355.99	45138.86	74406.45	47252.94	35313.22	70295.52	138576.42	732.18	15266.54	7194.09	633.79	6181.64	2296.71	5295.53	755.47	11917.11	3252.16	1205.67	1.0112972162587643	0.01146560093064094	0.11177368269239428	-3.161347551774413	down
MW5929	3-(2,4-Cyclopentadien-1-ylidene)pregn-4-en-20-one	C26H34O	345.2575	362.26099999999997	0.6336	1.3727	1	--	--	C14968	--	1	-	-	32380.86	16998.69	3380.94	28579.08	19373.72	32299.09	23820.09	17144.11	19156.19	20170.64	24093.29	12216.56	8695.63	12649.75	3264.23	10095.35	2984.84	9583.26	10810.94	1136.77	1.101492595991385	0.003163884683635217	0.44786260097764025	-1.1588718967375504	down
MW1787	Lercanidipine	C36H41N3O6	630.2981	611.2995	0.6335	4.9842	1	--	HMDB0014669	D08111	--	1	-	-	21015.77	11546.1	8520.08	21318.02	21213.03	20555.91	23115.99	1697.3	3021.66	18855.69	8620.24	8869.42	307.28	6606.51	9353.01	6780.93	8861.44	7089.31	6876.47	7629.01	1.0279748762198042	0.013532905010402892	0.4705941387204191	-1.0874447430706782	down
MW1148	Demethyldecarbamoylnovobiocin	C29H33NO10	574.2096	555.2104	0.6335	0.9217	1	--	--	C12475	--	1	-	-	16555.61	10291.44	11721.73	14135.4	14637.03	15375.65	15067.13	9093.24	15775.84	9260.69	5703.75	4753.03	7382.77	4407.11	2644.97	3962.56	2158.8	3149.29	3435.74	2671.1	1.5934223005004824	3.360446535061308e-07	0.3052685330173289	-1.7118492102216032	down
MW5647	1,1,1,3,3,3-Hexachloro-2-propanone	C3Cl6O	376.6832	261.808	0.6335	3.7188	1	--	HMDB0031489	C19122	--	1	-	-	16498.7	357.25	39504.35	11297.97	15131.4	15486.12	13206.1	10393.52	7461.7	7392.27	2974.45	162.42	612.4	309.79	395.0	1047.23	291.94	541.45	324.64	723.37	1.2271795058818984	0.003206904749977018	0.05399490584978883	-4.211032887163831	down
MW7517	Gentamicin C1	C21H43N5O7	541.3317	477.3162	0.6334	4.7145	1	25876-10-2	--	C07656	--	1	-	-	3385.77	4049.1	15417.5	439.43	866.32	510.15	3897.71	10554.35	1407.47	10519.74	22304.89	20114.77	21661.26	21973.88	21411.1	22438.44	21782.0	22432.73	21321.47	19076.75	1.6131852791138266	2.5175139037104757e-06	4.2023041658814515	2.071180589123616	up
MW2604	Sulfamoxole	C11H13N3O3S	283.0869	267.0678	0.6333	2.3541	1	--	HMDB0015688	D02516	--	1	-	-	10048.06	203.95	184.73	7390.16	9110.43	7897.18	7771.52	12992.61	15744.01	101.02	355.89	608.32	66.05	241.23	260.33	892.68	356.43	1057.1	121.04	206.34	1.1613725312494971	0.0036022717441898905	0.058303415823963124	-4.100275780655451	down
MW7734	Hydroxysenkirkine	C19H28NO7	400.2203	382.1866	0.6333	4.1689	1	26782-43-4	--	C19435	--	1	-	-	2984.45	4190.75	13904.38	2182.6	798.12	1102.95	740.72	3299.89	1296.13	1662.47	3900.0	73013.46	12463.38	40658.77	63425.37	8821.17	49540.61	10791.05	82360.78	2654.78	1.0592794414575035	0.010165035957762528	10.808544184742086	3.434100312789488	up
MW5945	3-Butynoate;But-3-ynoate	C4H4O2	85.0289	84.0211	0.6332	3.0485	2-MetDNA	2345-51-9	--	C06144	--	1	-	-	584010.9	197636.71	83701.98	581082.96	557932.77	604280.06	644857.87	624900.8	566615.73	160728.19	219324.08	168634.51	206369.63	152483.54	99778.56	88253.26	113980.15	60463.7	146917.03	60766.38	1.2803534445275968	0.0009474011871174869	0.2859407089962849	-1.8062120657327685	down
MW9190	Strychnine	C21H22N2O2	317.165	334.1681	0.633	2.4126	1	57-24-9	--	C06522	3463.0	1	-	-	1571479.07	4689.3	826942.08	1139339.22	1468613.76	1598725.44	908855.66	682849.5	748728.45	684412.11	284885.11	1553.17	22899.77	57804.09	499.88	15168.42	741.49	8941.23	366.54	22548.27	1.4253303161594164	0.00020500468625065865	0.0431161105405244	-4.535629149833298	down
MW8130	LysoPA(20:2(11Z,14Z)/0:0)	C23H43O7P	947.5391	462.2746	0.633	4.8681	1	--	HMDB0114758	--	--	1	-	-	3438.21	1598.18	9071.29	4078.22	2344.76	3198.91	1236.19	1855.3	3134.58	1261.18	42270.48	26080.41	66682.89	11682.83	19428.69	12944.49	16634.03	11424.67	50921.37	21084.06	1.2266170757943973	0.0025264099554094172	8.942420144012106	3.1606653299829137	up
MW9081	Saphenic acid	C15H12N2O3	286.1189	268.0848	0.6329	2.0507	1	--	--	C12117	--	1	-	-	7193.68	130.79	10102.41	10388.93	11819.48	8787.16	9158.63	533.01	573.28	152.16	1505.69	103.94	371.96	455.94	407.47	490.65	403.31	134.43	111.86	247.01	1.1340327304656146	0.0065325348842749644	0.07192885463225149	-3.797285558414628	down
MW2761	TG(a-21:0/i-18:0/19:0)[rac]	C61H118O6	411.0934	430.1111	0.6329	13.225999999999999	1	--	HMDB0066969	--	--	1	-	-	33667.48	25859.98	44375.49	27220.44	30447.44	39081.25	34989.93	50629.81	35766.16	62337.61	139282.68	137830.07	85436.2	86921.77	107720.27	111143.03	27816.23	52820.81	86933.45	23434.95	1.1302996277662565	0.005048095876204029	2.2356764642624682	1.1607114237909988	up
MW8043	Leucyl-Valine	C11H22N2O3	231.1701	230.16299999999998	0.6329	2.7539	1	--	HMDB0028942	--	--	1	-	-	14271.69	23662.54	12142.36	16959.24	9832.59	19008.78	16953.69	36165.21	27215.86	10996.58	47140.06	59349.53	60487.14	40111.97	49649.23	66407.43	62608.59	57542.01	65975.38	43601.33	1.6307819200173057	3.5911735525865035e-08	2.9532449214122383	1.5623010084374558	up
MW9654	Tyr Gln Arg	C20H31N7O6	430.2195	465.2336	0.6328	2.4748	1	--	--	--	23032.0	1	-	-	22546.03	20518.73	82081.76	22475.21	26575.65	26795.82	19321.37	12454.86	9603.32	16785.8	949.49	243.49	146.79	334.62	129.5	577.07	282.4	154.95	155.82	217.44	1.2291446097795435	0.003362028272050592	0.012315125238970506	-6.343424890340373	down
MW9434	TG(i-21:0/i-19:0/i-17:0)	C60H116O6	1079.2060000000001	520.1217	0.6328	4.9254	1	--	HMDB0066864	--	--	1	-	-	2203.18	4495.15	4947.55	2641.3	3130.48	2122.72	877.07	1959.65	5549.39	4944.3	107743.34	5607.22	59555.94	56565.39	39746.31	59151.77	51810.9	58657.79	110483.97	60955.38	1.4697634162694115	0.00019430200190048916	18.565967231088763	4.214588572113192	up
MW1775	Landomycin J	C43H54O17	861.3345	842.3361	0.6327	1.5195	1	--	--	C18824	--	1	-	-	3094.05	17214.06	415.91	2440.41	2850.81	880.28	3422.92	8665.19	8098.94	26261.5	54650.73	61208.91	21453.35	39007.94	72279.79	19036.77	64361.32	17665.99	28831.08	22669.94	1.2896407926868378	0.0006814335831875504	5.4696421946586815	2.451446459914485	up
MW7959	L-threo-7,8-Dihydrobiopterin	C9H13N5O3	284.0729	239.1018	0.6327	1.4512	1	--	--	C20263	--	1	-	-	4664.41	9133.79	1020.35	2098.07	7468.07	4213.6	3623.19	1174.68	5769.19	7367.84	3864.44	23720.48	23687.25	32953.48	43475.98	15723.47	47249.18	22923.24	23798.73	23449.82	1.378156807886343	0.000391374717399527	5.60559183670838	2.486866700382804	up
MW1276	Elymoclavine;Dihydrolysergol	C16H18N2O	291.0903	254.1419	0.6326	6.5155	1	548-43-6	--	C06068	--	1	-	-	41534.24	17800.5	39134.64	48255.99	43590.9	32152.25	48619.39	85428.6	74224.02	9750.68	167544.18	29442.09	133715.44	156099.96	177506.26	181202.0	188612.62	143175.07	189318.45	101945.52	1.4883216513295483	5.3965518207690506e-05	3.3339180366391425	1.7372186365415527	up
MW6563	Azatadine maleate	C28H30N2O8	522.2	522.2002	0.6326	2.4678	1	--	--	D00662	--	1	-	-	23350.88	23027.94	92773.64	26538.88	27888.65	28075.8	19034.48	8956.85	10776.06	17378.41	687.94	123.42	2082.75	139.5	2331.27	129.2	478.69	155.61	224.29	116.55	1.1690798253287706	0.005693153368269705	0.023287195728433376	-5.424319270804185	down
MW529	Agaritine	C12H17N3O4	266.1144	267.1219	0.6326	6.9118	1	2757-90-6	--	C01550	--	1	-	-	45185.08	1421.93	65325.27	40739.99	38105.71	41755.84	42292.24	68956.24	51914.99	60361.95	168025.12	102153.59	27723.56	42882.97	133399.08	92806.51	117662.25	63272.59	186485.99	75096.13	1.0773521853546082	0.008434672926123871	2.213545306087867	1.1463589023263911	up
MW6122	5''-Phosphoribosylparomamine	C17H34N3O14P	577.2119	535.1778	0.6326	4.7780000000000005	1	--	--	C21260	--	1	-	-	2447.28	9881.88	21323.47	3714.98	3788.68	6236.69	3822.59	139949.33	102998.04	3877.15	389446.81	107298.71	489111.49	301496.52	170597.61	202338.86	179277.67	215913.36	494459.99	245109.77	1.4135582279101024	0.00017392708263101647	9.378103428971583	3.2292961903022337	up
MW2777	TG(i-19:0/i-19:0/i-20:0)	C61H118O6	372.115	356.0955	0.6325	2.371	1	--	HMDB0063877	--	--	1	-	-	13090.14	568.15	52.87	8542.97	6104.8	6973.66	11376.34	26239.9	16778.26	3978.16	1806.9	2384.16	174.42	569.35	1161.14	1824.61	1617.14	2262.7	1922.27	170.39	1.0308367479858755	0.01123904959535028	0.14826362450342964	-2.7537634093378527	down
MW8347	N-dodecanoyl-L-Homoserine lactone-3-hydrazone-biotin	C26H43N5O5S	520.2949	537.2985	0.6325	4.6589	1	--	--	--	64900.0	1	-	-	14040.33	747.92	18908.68	997.65	12436.71	886.52	8548.13	1197.86	10638.22	18271.0	102304.96	67557.52	88326.07	38795.23	39305.65	1398.9	3631.24	23543.76	113329.28	76595.8	1.1285359757207376	0.004830241734342514	6.400935492959633	2.6782827695540363	up
MW1548	His Leu	C12H20N4O3	267.1465	268.1535	0.6324	13.1859	1	7763-65-7	--	C05010	23852.0	1	-	-	82876.77	100945.27	59456.96	43829.71	56081.0	49664.4	78456.49	86649.48	249217.42	81702.33	26255.3	54632.09	16339.23	31097.96	21238.02	28945.44	20598.35	28104.0	24725.98	27308.77	1.048959742298972	0.009940120565851186	0.31415398412179063	-1.670456218332544	down
MW2760	TG(a-21:0/i-18:0/18:0)[rac]	C60H116O6	385.0926	404.1107	0.6323	5.7418	1	--	HMDB0066781	--	--	1	-	-	9150.8	32466.37	8399.09	6846.58	10463.95	12716.71	10808.86	2308.83	5465.73	15932.8	12783.11	27252.17	31555.15	24076.7	47023.29	70404.33	38407.03	57242.5	19918.81	14452.88	1.1570009089661761	0.004274886187395756	2.9950838741575136	1.58259640472918	up
MW9207	Sumaresinolic acid	C30H48O4	536.3714	472.3553	0.6323	11.2792	1	559-64-8	--	C17070	--	1	-	-	11070.54	28952.62	10639.97	14354.15	6540.53	12311.32	11981.19	11918.97	9228.38	16083.82	76654.19	102217.39	49428.21	29378.73	74703.3	60975.47	54609.56	38429.09	51118.7	38751.1	1.4548816336643768	8.843391498266996e-05	4.330171987103541	2.1144243274955934	up
MW7568	Glu Glu Phe Leu Val	C30H45N5O10	618.3137	635.3166	0.6323	4.063	1	--	--	--	264784.0	1	-	-	160255.46	202886.24	12925.91	181773.13	142485.8	168113.13	183171.89	145377.45	186508.09	200698.66	127081.95	52703.65	87473.62	51446.52	23402.76	13683.73	36808.61	6502.15	26841.31	44587.01	1.3845193158592166	7.427611399661605e-05	0.2970158877334705	-1.7513879903217993	down
MW9154	Sodium lauryl sulfate	C12H25NaO4S	288.1364	288.1371	0.6322	4.4364	1	151-21-3	--	C11166	58284.0	1	-	-	18660.4	311.61	19389.43	15516.33	16567.63	13590.95	19878.32	6681.96	485.21	350.16	2636.05	1154.96	252.56	898.76	198.19	426.18	1191.4	1379.34	3475.01	912.51	1.1786609384852489	0.0044414057320548254	0.11240002871706513	-3.1532856907345543	down
MW2100	O-Ethyl S,S-diphenyl phosphorodithioate	C14H15O2PS2	619.0363	310.0251	0.6322	1.3283	1	--	HMDB0031781	C14436	--	1	-	-	477788.05	224825.16	479915.94	418975.35	476572.51	520582.56	464821.98	764337.9	934161.5	72805.92	95230.42	64506.89	453419.49	112503.52	79340.17	164204.05	49518.78	258951.83	357794.81	429899.55	1.0111037660303586	0.007957537032045194	0.42718936026232734	-1.2270523797156647	down
MW6738	Captan	C9H8Cl3NO2S	615.9024	298.9341	0.6322	4.9163	1	133-06-2	--	C14438	--	1	-	-	1862.92	521.3	714.68	1431.53	2846.37	513.55	1074.73	6534.59	900.26	387.3	90984.98	2186.92	59731.88	40562.93	52617.29	72065.45	61510.42	51742.42	102430.12	48131.02	1.5130027273768372	0.00011224253986762469	34.66703142805573	5.115492397324126	up
MW7167	Desvenlafaxine	C16H25NO2	308.1601	263.1885	0.6321	2.4111	1	--	HMDB0015646	D07793	--	1	-	-	23452.34	6316.74	9498.28	15775.94	19533.82	23689.68	16322.92	8114.56	10906.55	174.79	549.84	265.64	94.33	292.41	533.06	382.99	161.67	570.23	516.37	255.26	1.373519782387307	0.0004629723242403988	0.02707166883854932	-5.207072364250354	down
MW8903	Proanthocyanidin A2	C30H24O12	643.0797	576.1268	0.632	4.0938	1	--	HMDB0037655	C10237	--	1	-	-	46201.67	77640.02	3797.15	52801.06	47166.14	57574.27	60704.91	62004.71	54427.64	57941.62	44882.91	20088.14	31255.98	24242.97	30529.02	6482.22	18290.66	4706.11	11283.88	17844.75	1.259294475748712	0.0005742027506516768	0.402888875446871	-1.3115461244944375	down
MW308	3-Dehydro-L-threonate	C4H6O5	115.0034	134.0215	0.632	0.9406	1	--	METPA0357	C03064	--	1	-	-	451330.1	449644.11	195241.82	426595.12	434935.68	463165.51	465569.9	176292.7	167856.62	985214.56	142129.19	92049.95	157782.84	152888.96	156089.69	172359.51	160872.9	176799.19	342484.2	94301.05	1.1103448209424185	0.007359172769819201	0.3908485824904823	-1.3553182893982716	down
MW6397	Amisulpride	C17H27N3O4S	436.1253	369.1722	0.6319	2.1745	1	--	HMDB0015633	D07310	--	1	-	-	23835.93	131.56	13007.18	29035.02	29967.13	33856.86	31381.99	5942.33	2957.88	1160.81	43.38	34.91	2360.55	28.8	78.74	2746.82	61.93	47.08	4119.54	2627.39	1.150424028868681	0.0053823223552983395	0.07093282804566108	-3.817402721723581	down
MW6644	BILA 2185BS	C35H46N4O4S	682.3402	618.3240000000001	0.6318	4.0441	1	154612-58-5	--	C15657	--	1	-	-	26582.68	38640.33	10029.23	30949.24	27637.05	32326.04	29133.93	9965.35	6393.04	2533.54	2105.21	590.9	1365.49	881.04	1528.18	207.03	1265.52	501.74	2047.48	315.14	1.3433429798699597	0.000709144640290779	0.050458510214485296	-4.308758578345625	down
MW6990	Clenbuterol	C12H18Cl2N2O	299.0687	276.0796	0.6318	0.7431	1	37148-27-9	HMDB0015477	D07713	85074.0	1	-	-	115087.17	154891.9	255987.79	118792.85	98872.26	103970.85	117959.22	132236.88	151421.1	148618.42	673230.38	297555.61	270405.04	1040479.4	313133.7	261355.79	298228.21	850164.09	255914.43	304387.32	1.110168083218622	0.007024846730222674	3.2656520520354264	1.707371083139472	up
MW1383	Gambierol	C43H64O11	777.4192	756.4449	0.6318	10.7462	1	146763-62-4	--	C20004	--	1	-	-	1616.09	2910.36	7509.11	2035.94	2234.28	3150.61	1644.56	2294.99	1841.11	1730.61	9036.61	14448.69	10641.4	20516.69	6643.52	19879.33	8242.09	18717.56	116.75	18893.42	1.2691911635782251	0.001133476750787049	4.714389754246382	2.237071035905501	up
MW1434	Glu Glu Asn	C14H22N4O9	779.2696	390.1387	0.6318	0.8305	1	--	--	--	15669.0	1	-	-	13103.22	13406.52	7966.42	11510.35	13152.69	11054.9	13969.75	8187.8	7999.95	5808.24	7857.76	1218.77	8336.68	2881.48	2643.04	2877.34	2413.47	2840.76	8562.08	5561.41	1.3147906929313966	0.00014662267373522267	0.4257051442428701	-1.232073571061291	down
MW9773	YC-1	C19H16N2O2	631.2313	304.1212	0.6317	4.7858	1	170632-47-0	--	--	64877.0	1	-	-	7360.63	52917.71	114519.2	3086.87	4648.62	15735.66	2984.4	74486.8	46235.62	4815.58	677029.89	262697.86	641404.8	507352.18	295742.45	416302.86	319042.66	397867.45	875739.41	565265.11	1.5380864413004312	2.9344500521173186e-05	15.173132994537886	3.9234471032807283	up
MW2677	TG(20:0/a-15:0/15:0)	C53H102O6	908.3402	892.3306	0.6317	1.1955	1	--	HMDB0064432	--	--	1	-	-	43455.92	108593.62	27906.01	19093.52	25393.0	22600.2	14654.3	5878.84	3489.03	72139.46	130449.97	187439.79	80678.88	97516.5	143216.56	63522.74	133098.89	61935.59	57108.93	39916.85	1.125217276675586	0.002493787399600929	2.8988152523907798	1.5354633903317492	up
MW2406	PS(15:0/22:1(13Z))	C43H82NO10P	802.5599	803.5676	0.6317	13.3877	1	--	HMDB0112335	--	--	1	-	-	13152.52	28565.36	55017.41	65167.72	88441.42	82857.2	72142.77	62653.49	24389.67	63577.22	22653.86	40354.82	37132.82	25316.89	38822.66	23990.92	19892.85	17912.6	10587.01	8573.15	1.1596091682132723	0.0038990637658601283	0.4411027259676413	-1.1808134187287218	down
MW2207	Penitrem E	C37H45NO6	580.3065	599.3247	0.6316	9.5456	1	78213-66-8	--	C20597	--	1	-	-	1747.33	1493.88	1590.97	882.82	873.83	998.65	1170.54	728.98	227.76	2278.57	5453.12	4255.04	2028.01	2525.61	2927.91	5765.86	2190.76	3065.15	888.24	3733.8	1.208396174868795	0.001875528379351272	2.7376466752770083	1.4529362622575523	up
MW9227	Terminalin;Gallagic acid	C28H10O16	566.9827	601.9969	0.6315	4.238	1	155144-63-1	--	C10242	--	1	-	-	1937.07	11852.7	425.71	888.18	729.15	954.16	662.98	4139.22	4282.45	418.86	2335.73	10266.69	3645.47	24697.3	15251.27	5929.4	14662.02	6531.83	15295.48	2819.04	1.019936739653306	0.011318472173500795	3.85821141340896	1.947932199042809	up
MW7758	Ile Cys Lys	C15H30N4O4S1	362.19800000000004	362.1988	0.6312	4.1558	1	--	--	--	21408.0	1	-	-	2784.73	4506.77	5372.3	1393.87	2844.74	2714.39	3440.98	2704.77	3205.89	1406.35	8840.8	44127.43	10484.88	10692.78	25701.4	8990.89	30497.44	14004.42	21695.74	4516.76	1.1660572686748805	0.004167164849027272	5.9112356003119695	2.563459722302227	up
MW5598	1-Methylseleno-N-acetyl-D-galactosamine	C9H17NO5Se	637.0172	299.0272	0.6312	1.1071	1	--	--	C18893	--	1	-	-	85287.33	60924.98	47221.32	91428.12	89238.16	86558.59	91871.62	107523.68	111606.65	40677.22	14794.06	17142.29	42984.74	17610.52	15555.63	30827.1	14301.25	34808.73	30119.47	59079.52	1.4297345625620246	2.373028212848971e-05	0.3412661018169944	-1.551030977166982	down
MW7837	Isocarbamid	C8H15N3O2	249.132	185.1164	0.6309	3.2512	1	30979-48-7	--	C19047	--	1	-	-	6088.3	3712.92	16721.98	5752.16	6791.05	7292.57	6054.28	5767.12	4566.84	9548.63	12491.96	13440.21	30342.5	7470.94	29805.87	16374.53	24304.82	12957.25	41604.77	19818.82	1.1939794898481488	0.002581197405810909	2.8855275925243284	1.5288351266797926	up
MW784	Boc-Phe(NMe)-Gly-OMe	C18H26N2O5	371.1586	350.1842	0.6309	0.843	1	--	--	--	65476.0	1	-	-	27801.43	32738.46	20637.74	26506.89	28773.91	31022.54	28354.14	21234.48	21824.57	46266.8	20801.27	8092.83	13408.15	16478.91	15321.26	10556.59	16144.36	10780.33	11333.1	7425.02	1.4317937478561162	5.1879412500040306e-05	0.4570815724564821	-1.1294764379702324	down
MW1709	KOdiA-PC	C32H58NO11P	700.3238	663.3747	0.6309	4.7349	1	439904-33-3	--	--	44814.0	1	-	-	86416.29	69411.03	109934.43	97236.3	91370.65	110726.63	115296.09	47137.54	44910.79	109421.17	544.73	643.1	2564.99	3187.39	1259.57	2626.49	755.23	902.23	827.78	906.42	1.6630630059958311	2.385897479635099e-06	0.016122644373446095	-5.9547678012700676	down
MW7484	Furosemide	C12H11ClN2O5S	331.0153	330.0077	0.6308	4.3563	1	54-31-9	HMDB0001933	C07017	2981.0	1	-	-	25310.51	11736.2	7222.64	22934.07	25252.6	27122.63	24570.03	483.81	813.52	13504.55	4654.6	3362.88	3006.18	2135.16	3019.27	2563.63	2954.68	238.88	229.99	4026.05	1.2202082002142178	0.0030472056891364674	0.16477651918936306	-2.601417423134456	down
MW6350	Ala Tyr Glu Asp	C21H28N4O10	1031.3249	496.1805	0.6307	4.8811	1	--	--	--	111142.0	1	-	-	21994.56	13771.06	10308.07	50343.59	32963.54	41652.54	42486.88	76428.27	50403.36	15018.75	14399.35	2044.29	12427.58	2089.05	6950.62	9330.15	5992.77	635.89	11715.41	12762.96	1.2057139962622685	0.002191354406235791	0.22046861949364305	-2.1813547711802603	down
MW2222	PERSEITOL	C7H16O7	211.0825	212.0896	0.6307	5.5076	1	527-06-0	--	C08255	44475.0	1	-	-	454.79	11833.35	129628.95	10442.96	5355.31	5304.58	883.76	124429.78	31352.24	5778.84	190889.31	110465.97	155793.64	204516.3	12718.1	146926.6	4076.98	225222.55	118302.21	101171.95	1.0878977787726007	0.004452372708636931	3.902371459430176	1.9643511119221344	up
MW8270	MLS000069824-01!NORETHYNODREL	C20H26O2	635.3494	298.1933	0.6307	4.7842	1	--	--	C14249	--	1	-	-	6948.49	3846.67	82548.3	1186.17	2678.73	4945.21	2094.72	42087.78	8104.68	2244.0	211412.58	166194.97	243271.34	361324.05	260277.71	277260.21	278896.91	247293.34	329125.95	324130.95	1.6798204702250827	1.705611268612752e-08	17.22687121752436	4.106588794775983	up
MW9318	TG(21:0/i-17:0/i-22:0)	C63H122O6	585.1857	543.1523	0.6306	0.8134	1	--	HMDB0066957	--	--	1	-	-	1019.14	2075.7	2544.03	1856.73	458.72	1233.12	997.53	2955.92	559.25	2658.48	5851.3	8819.41	8031.33	9345.34	6522.39	8522.17	9742.33	5870.22	3528.84	14033.84	1.4735451825858683	3.523294157348599e-05	4.9067201267588585	2.2947589842139307	up
MW8139	m-Carboxyphenyl phenylacetamidomethylphosphonate	C16H16NO6P	416.0251	349.0715	0.6305	0.8338	1	--	--	C04684	--	1	-	-	50068.53	91410.11	94599.54	64353.7	32702.83	46557.16	42710.48	41573.53	35353.39	124192.58	163301.12	95518.48	124224.23	117449.84	117289.95	130621.41	117064.8	132273.24	150132.72	101475.12	1.3837886186532815	7.009348138230734e-05	2.003700287327541	1.0026667269346714	up
MW9191	SU 11652	C22H27ClN4O2	491.1017	414.1823	0.6304	4.9175	1	326914-10-7	--	--	45563.0	1	-	-	11283.17	1559.9	3323.0	11155.42	11341.92	8737.08	1235.43	4487.11	1455.22	11278.77	108273.7	7664.45	50875.83	40922.22	25196.34	37415.64	32430.68	44740.36	79387.83	39197.52	1.2963357437664762	0.0015147071109338165	7.077522942884449	2.8232445208575463	up
MW5867	2,2-Dimethyl-8-prenylchromene 6-carboxylic acid	C17H20O3	272.1405	272.1412	0.6303	4.7128	1	151731-50-9	--	C09003	--	1	-	-	8862.71	386.94	9919.29	8960.43	8143.04	8608.28	10016.51	409.63	124.75	1125.96	1383.76	371.51	630.82	105.54	504.27	122.49	234.44	310.51	275.69	829.12	1.1708245158898436	0.00517387145346289	0.0843061773903179	-3.56821784373358	down
MW6775	Caylin-1	C30H28Cl4N4O4	715.0393	648.0865	0.6303	4.0569	1	--	--	--	64651.0	1	-	-	128048.13	171129.39	4154.86	163311.59	138060.85	165386.16	198215.53	145915.57	129225.62	218099.36	147501.71	24903.59	88338.32	35026.15	9249.06	11579.81	21077.61	8764.13	28978.11	49564.11	1.29817272035157	0.00031294240695338644	0.2907758577407696	-1.7820206033586723	down
MW5733	16beta-Fluoroandrost-4-ene-3,17-dione	C19H25FO2	631.3567	304.1839	0.6302	4.7842	1	--	--	C14886	--	1	-	-	978.39	28654.42	14348.19	23738.0	13463.37	21106.58	27656.4	23352.7	10204.44	39438.02	344241.18	113272.87	392996.7	255102.94	198320.81	261361.91	207701.95	218892.35	451253.96	304453.22	1.5706175578896922	2.013174644467864e-05	13.538932616262764	3.759042098946166	up
MW9606	Trimipramine maleate	C20H26N2.C4H4O4	455.1916	410.2206	0.6302	0.8542	1	521-78-8	HMDB01848	C14029	--	1	-	-	14600.63	14774.79	6445.39	14552.23	14519.37	12759.3	13360.35	1189.08	2753.65	19203.83	26530.22	40466.53	36217.44	56080.11	30625.38	26077.47	30739.89	23239.68	38707.56	26747.3	1.433271280844122	2.095685344398325e-05	2.9382939282202254	1.5549787211411017	up
MW8713	Petasitenine	C19H27NO7	458.0981	381.1788	0.6302	1.4358	1	--	HMDB0030328	C10359	--	1	-	-	9303.32	15390.78	1209.71	4993.71	12918.69	5823.8	7287.18	2235.01	2749.05	9476.78	13758.6	103820.82	27717.13	25355.86	63429.75	38906.16	63058.78	43881.36	18073.88	28768.21	1.2051914327417408	0.0025984523172040497	5.978180795856113	2.579706528555125	up
MW356	4-(beta-D-Ribofuranosyl)aniline 5'-phosphate	C11H16NO7P	342.0148	305.0664	0.6302	4.3112	1	--	--	C20559	--	1	-	-	35232.88	8295.68	5769.58	33238.86	26852.41	34926.74	40386.24	3575.33	890.34	281.61	278.05	4271.32	5596.31	3324.29	445.85	4410.42	3368.19	4943.17	4442.61	322.12	1.0235638264663474	0.014246167103213771	0.16575552757626869	-2.592871113093078	down
MW8799	Phosphocreatine	C4H10N3O5P	234.0254	211.0358	0.6301	0.8444	1	--	HMDB0001511	C02305	--	1	-	-	18337.72	3211.41	16019.6	17726.44	18427.72	16166.18	19574.08	2929.81	2178.57	2244.77	334.54	2100.96	267.04	1565.05	251.63	2144.92	1579.06	2076.93	2705.12	2404.82	1.2318005101922442	0.002710592307605457	0.13208833013885904	-2.920425083219332	down
MW8739	PGP(22:6(4Z,7Z,10Z,13Z,16Z,19Z)/16:1(9Z))	C44H74O13P2	914.4948	872.4605	0.6301	13.1029	1	--	HMDB0116507	--	--	1	-	-	559743.6	998289.04	998632.0	323011.29	873032.41	975139.27	333993.7	857289.37	784336.21	786783.2	102793.61	75769.35	329856.98	64048.43	76444.24	79602.79	61535.89	61512.64	148615.82	551366.27	1.4731460610475755	1.6701400573545628e-05	0.2071420848913204	-2.27130740035448	down
MW7652	HC Toxin	C21H32N4O6	503.1852	436.2322	0.6301	4.7925	1	83209-65-8	--	--	64768.0	1	-	-	945.28	2692.72	4519.18	836.82	460.21	482.92	3000.35	1821.56	2366.39	567.01	104256.52	17031.82	87746.63	49356.14	18850.34	27660.34	26106.17	35026.68	96644.65	51794.56	1.3242540049801224	0.0010523846222075068	29.07873928073234	4.861892816935002	up
MW6483	Asn-Asn-OH	C13H14N4O8	393.0446	354.0812	0.6301	4.1143	1	--	--	--	65307.0	1	-	-	16638.45	1085.13	6613.89	15236.48	18145.51	15513.73	13272.64	14856.63	21565.22	402.3	27407.23	148218.69	46983.45	105975.44	66727.97	49435.19	66916.38	44728.1	65654.93	18259.15	1.2295436755425315	0.001987877314377912	5.191815728827653	2.3762391792106508	up
MW7146	Delavaine A	C38H54N2O11	714.3719	714.3728	0.63	4.0552	1	109291-57-8	--	C08674	--	1	-	-	1068870.84	1264495.2	134606.44	1161314.05	1016152.68	1225621.62	1276290.74	1083579.69	928515.54	1605536.98	1078563.2	365195.76	694098.8	319782.53	177575.55	156305.67	166936.76	134793.79	228912.32	369768.17	1.3134947294679666	0.00023975116796990907	0.34295755808375217	-1.5438980448177717	down
MW7789	Ile Tyr Lys Ile Arg	C33H57N9O7	730.4018	691.4381	0.6299	4.7612	1	--	--	--	264483.0	1	-	-	102499.23	19628.56	74327.23	113202.66	58647.02	121115.0	131381.0	752174.37	490575.92	10637.04	1164103.8	387304.8	1377763.37	554946.68	823112.27	874508.21	687858.35	653766.19	1425984.47	637161.28	1.3780241737546106	0.0001419242280902295	4.581455693108873	2.1958060672200124	up
MW1284	Epicatechin-(2beta->7,4beta->8)-epicatechin-(4beta->8)-epicatechin	C45H36O18	880.21	864.1902	0.6298	0.8551	1	--	HMDB0037672	C17631	--	1	-	-	7606.6	15207.86	42700.43	10099.74	9894.61	12553.33	8396.48	4986.28	3897.89	9116.77	41067.72	39059.23	55079.89	63297.39	82380.65	105962.86	78206.89	113482.11	68800.99	90525.09	1.5280643267431362	1.1783319392164274e-05	5.928514215692932	2.567670586688344	up
MW8904	Probenazole	C10H9NO3S	270.0434	223.0303	0.6297	2.3222	1	27605-76-1	--	C18483	--	1	-	-	42511.16	322.25	6203.86	45714.68	36143.48	34936.2	68193.78	4468.27	3921.29	1204.29	31.12	20.2	207.26	85.09	171.44	87.05	173.49	202.56	29.94	151.29	1.0673189136197592	0.011090272148246668	0.004759229627411232	-7.715056220091123	down
MW8267	MK 0524	C21H19ClFNO4S	511.9895	435.0707	0.6297	4.8506	1	571170-77-9	--	D08940	45200.0	1	-	-	405.39	1049.28	1104.33	3650.89	4262.9	1518.97	413.54	1662.05	6680.3	891.63	48092.36	10634.43	33919.49	23096.98	24990.85	20984.98	15482.75	19196.53	52759.67	31540.99	1.4539160658525063	0.00018645361282333933	12.971736120610295	3.697299675862861	up
MW6325	Ala Asn Lys Glu Lys	C24H44N8O9	606.3566	588.3231	0.6297	4.6255	1	--	--	--	264254.0	1	-	-	25336.1	591.81	780.91	29004.39	24600.45	25576.22	30771.77	6949.65	7417.67	907.03	492.45	362.81	1078.33	1958.1	2406.63	3150.17	2100.44	2507.66	4450.44	420.46	1.066157731530776	0.009630754254993623	0.12457541333192924	-3.0049087341034424	down
MW5602	1-Myristoyl-sn-glycero-3-phosphocholine	C22H46NO7P	973.5662	467.3012	0.6296	4.6263	1	20559164	HMDB0010379	--	--	1	-	-	1678.56	1967.87	1692.32	1721.93	3028.07	7350.87	4790.93	5916.82	827.52	1712.77	5427.14	4303.15	12336.46	24130.86	43821.68	14517.02	48761.83	14392.98	48446.14	47779.7	1.2036890149860446	0.003397578925790173	8.600100496421037	3.1043535185171938	up
MW8923	Prorocentrolide	C56H85NO13	1043.6172	979.6021	0.6296	4.726	1	117120-34-0	--	C20023	--	1	-	-	1999.96	1996.73	3227.85	1136.74	2343.13	1824.53	3276.99	2593.29	1034.26	1879.49	82658.56	31815.0	123884.61	34814.88	48206.17	19285.94	50022.6	16450.6	189937.52	27367.75	1.1241005235670931	0.007418436181205581	29.29876173991705	4.872767787881963	up
MW8775	Phe Tyr Val Lys	C29H41N5O6	520.2915	555.3057	0.6295	2.4611	1	--	--	--	143427.0	1	-	-	78676.02	74556.07	300685.96	67538.07	81549.35	87522.23	62688.44	46223.88	36691.23	47207.39	1229.75	696.33	8538.86	248.84	472.19	231.8	11573.28	130.39	13555.51	540.45	1.1463654912728165	0.0067300464016756215	0.0421326525464798	-4.5689174432268675	down
MW7156	Deoxycorticosterone	C21H30O3	397.1725	330.2195	0.6295	4.6823	1	64-85-7	HMDB0000016	C03205	5089.0	1	-	-	572640.7	276717.77	37657.94	577634.05	523373.55	588656.24	593207.61	357077.88	366843.78	299362.54	89114.5	68477.37	83101.99	531.04	17670.92	19944.06	6995.78	8166.31	89385.42	18069.3	1.4660557443098197	9.043838309546491e-05	0.09574057163778776	-3.3847257697987296	down
MW2123	Oryzalin	C12H18N4O6S	345.0877	346.0947	0.6294	3.9698	1	19044-88-3	--	C18877	--	1	-	-	661.37	3359.67	5455.96	523.07	486.67	680.23	596.5	9060.01	10425.9	1978.01	7209.02	4376.82	43192.17	44038.33	33576.18	38344.41	32435.55	32115.69	23169.63	49273.55	1.4166897363647235	0.0002253388424465914	9.261375931121883	3.2112265457039624	up
MW1087	Cymiazole	C12H14N2S	199.0696	218.0878	0.6294	0.7264	1	61676-87-7	--	--	263521.0	1	-	-	391139.23	199705.37	407424.02	396272.35	386596.28	390256.7	396609.6	210569.99	205128.22	263628.4	74237.59	37482.31	45397.05	43314.01	45249.18	27044.24	45203.31	26062.72	36338.29	24325.61	1.6303263360476663	3.402433799497533e-06	0.12461138537265333	-3.004492205736822	down
MW6651	Biperiden hydrochloride	C21H30ClNO	386.1645	347.2016	0.6294	3.7028	1	--	--	D02246	--	1	-	-	13149.42	287.83	31588.53	10103.46	14240.8	16959.95	9834.78	10608.89	10463.63	89.62	433.57	767.4	971.36	511.52	641.88	1466.05	723.36	496.39	690.73	575.75	1.2089632814421434	0.003452011592087451	0.062031890211717004	-4.010846102951113	down
MW7541	Gln Glu Tyr	C19H26N4O8	899.34	438.1751	0.6294	4.9171	1	--	--	--	17547.0	1	-	-	2565.64	14722.98	6849.09	2237.24	1302.18	435.93	977.3	2539.99	667.02	1949.57	197521.25	17182.3	108136.24	97905.45	75854.88	101964.25	87836.33	108967.62	196823.62	121542.63	1.4919500058718584	0.00012474301715992246	32.52070316355271	5.023286546630042	up
MW7303	dl-alpha-Tocopherol nicotinate;Tocopheryl nicotinate	C35H53NO3	577.4367	535.4025	0.6293	4.788	1	51898-34-1	--	C12981	--	1	-	-	2224.5	2532.74	2528.84	1311.51	1093.39	1796.12	2322.08	10457.95	3465.08	935.54	97899.85	16332.54	147658.92	61538.5	31245.36	49243.98	46775.62	35613.57	79003.49	78587.3	1.3589288213095962	0.0006629846719442466	22.460748750773956	4.489334117061459	up
MW1621	Imazalil	C14H14Cl2N2O	277.0301	296.0483	0.6292	4.6851	1	35554-44-0	HMDB31794	C18739	--	1	-	-	16747.44	23156.26	17332.96	13274.51	18631.87	17096.73	12824.57	20765.79	22104.51	17611.08	22499.66	27894.58	38023.85	44076.92	25293.44	62468.24	22901.77	58994.24	37902.05	46361.91	1.2942162619254791	0.0013104435356123742	2.1521908737228603	1.1058060334530453	up
MW7447	Fexofenadine	C32H39NO4	578.2074	501.2879	0.6292	4.2939	1	--	HMDB0005030	C06999	--	1	-	-	14184.18	61602.33	55158.78	22672.67	839.66	3557.11	972.29	33027.95	56705.53	12681.57	323929.88	300725.45	208342.52	301192.6	54661.38	144077.13	74297.65	125198.37	14242.99	76297.94	1.146850927863531	0.004293186173728378	6.2086957077271805	2.6342902259934617	up
MW6804	Cefadroxil	C16H17N3O5S	765.1405	363.0889	0.6292	1.4109	1	--	HMDB0015271	C06878	--	1	-	-	3866.89	16804.34	315.61	9636.12	2249.91	11497.43	3875.24	5716.92	11280.22	9676.75	22749.86	47234.99	22919.47	45135.62	41791.98	31797.06	65806.63	31883.17	34118.34	10607.34	1.4052461805608272	0.00021657695364954492	4.725669429145417	2.2405187131854944	up
MW1330	Fetidine	C40H46N2O8	701.3248	682.3254	0.6291	4.7351	1	7072-86-8	--	C09441	--	1	-	-	10781.42	8286.2	20593.83	14843.96	15180.59	19322.23	13424.09	3221.66	1953.0	19391.41	166.14	333.88	2715.54	122.3	2964.14	1886.42	3066.07	501.24	148.99	2849.86	1.4125118545914663	0.00039114660656878683	0.116179268099383	-3.1055754485090783	down
MW3056	Val Val Arg	C16H32N6O4	371.2415	372.2485	0.6291	6.0238	1	--	--	--	16915.0	1	-	-	227191.57	80965.36	68074.72	210678.41	203395.05	137973.43	232765.7	115668.61	113324.0	57901.02	358413.9	33796.43	271429.57	252775.78	168164.52	353877.12	175797.06	480135.78	364600.17	447991.76	1.0497993338239515	0.010060373390164173	2.0076704603354285	1.0055224843006654	up
MW5668	1,2,3,4,6,7,8,9-Octachlorodibenzofuran;Octachlorodibenzofuran;OCDF;PCDF 135	C12Cl8O	439.7449	439.7457	0.629	4.2309	1	39001-02-0	--	C18113	--	1	-	-	692.08	151173.46	105468.24	1436.03	1325.5	3101.69	25425.64	40220.0	47091.43	2104.82	37188.91	470153.24	315358.26	121066.21	562929.83	139880.48	198366.5	292680.48	173613.31	129801.52	1.1601941264118287	0.0033856748240454998	6.457110113724013	2.6908886297132675	up
MW1439	Glu Leu	C11H20N2O5	241.11900000000003	260.1372	0.629	6.3447	1	--	--	--	44684.0	1	-	-	665662.2	298972.49	297568.84	677368.4	587884.77	1014887.48	1034446.78	201865.35	197424.72	842442.39	12484.66	11016.76	9327.03	11012.54	15668.93	4876.75	9909.37	7997.84	11700.22	4061.84	1.4371851816586445	0.00032194273572252373	0.016852375237152526	-5.8909042451711215	down
MW6979	CL(i-14:0/i-16:0/i-13:0/18:2(9Z,11Z))	C70H132O17P2	459.0377	344.1624	0.6289	0.8205	1	--	HMDB0092276	--	--	1	-	-	33005.97	52561.22	30881.51	30067.49	30241.28	33202.17	31918.4	17461.81	19153.89	54204.42	49611.67	108362.22	72031.86	164931.65	134634.22	38577.35	125079.19	47027.58	64513.84	49438.76	1.1228783508922102	0.004702045493865121	2.5675174759006785	1.3603740963329307	up
MW1064	Cucurbic acid	C12H20O3	228.1602	212.1412	0.6289	7.1777	1	58240-50-9	HMDB29388	C08482	--	1	-	-	21134.42	6607.2	71623.31	13094.21	9267.64	12083.39	13491.92	6608.18	6435.9	2664.25	88774.42	13132.57	30120.44	35731.53	42195.63	47170.57	43928.6	39025.85	26623.95	64731.11	1.002113731495055	0.009216766726761144	2.646669274270933	1.404177928048547	up
MW1132	Deaminohydroxyblasticidin S	C17H25N7O6	845.3653	423.1866	0.6288	3.9373	1	--	--	C03860	--	1	-	-	24922.2	13332.53	11793.08	26013.63	21885.48	21624.68	22070.26	2284.21	1848.16	10972.77	6050.13	571.68	3775.08	2207.97	2292.39	4231.31	804.44	4407.37	4011.19	286.08	1.2773633499138382	0.0013344268443084605	0.182699764588796	-2.4524533198535177	down
MW1290	Epoxy Fluor 7	C23H19NO5	388.1188	389.1263	0.6288	4.4774	1	863223-43-2	--	--	64657.0	1	-	-	46612.58	83684.58	1721.61	50367.21	38241.56	50850.25	47980.18	57985.83	53120.34	104171.13	4625.81	756.14	842.37	1879.95	1587.05	857.43	2460.4	1914.24	3283.12	485.55	1.4546089441607508	0.00018424509777595336	0.034955726784208566	-4.838327358598606	down
MW7089	D-Cathinone	C9H11NO	216.0371	149.0841	0.6287	4.6515	1	71031-15-7	--	C08301	63533.0	1	-	-	4482.32	2115.26	510.83	3238.89	6109.47	4433.38	5271.19	2940.21	4513.22	1673.11	3945.4	6519.63	13435.67	7816.89	13734.22	16123.14	10682.31	16214.54	13754.68	11808.07	1.4365876279418117	0.00012080900048916443	3.2315500392769416	1.6922263313521235	up
MW8131	LysoPA(20:3(5Z,8Z,11Z)/0:0)	C23H41O7P	483.2486	460.259	0.6287	4.0171	1	--	HMDB0114747	--	--	1	-	-	764.11	3406.49	1984.87	786.88	835.15	1404.86	664.43	887.67	2003.88	780.97	412.29	18052.48	1453.37	12218.97	9216.58	6454.89	13481.27	5335.93	7963.96	816.97	1.0765527932906234	0.008712822689298119	5.577704039629243	2.4796713850856458	up
MW9405	TG(i-20:0/i-13:0/8:0)	C44H84O6	448.9806	334.1053	0.6287	4.2358	1	--	HMDB0063275	--	--	1	-	-	9231.49	8470.93	15778.16	9919.24	9739.69	8576.29	8019.33	1470.1	558.44	11179.83	3013.69	50766.48	35784.88	11399.68	59405.72	18685.5	30208.47	34920.93	22725.75	14940.75	1.1029063310077256	0.006037129738057105	3.3981185988052114	1.7647362053538749	up
MW8754	Phe Glu His Phe Leu	C35H45N7O8	758.2858	691.3330000000001	0.6286	0.8989	1	--	--	--	264821.0	1	-	-	9977.55	8191.64	12924.92	9233.62	10022.96	9073.7	9296.96	9950.99	11175.0	5242.02	54970.82	89326.2	23593.97	34420.4	47022.44	15746.55	46704.08	15541.63	9558.2	9299.56	1.0274178255745487	0.012267765743573343	3.640616047894318	1.8641825971385784	up
MW8563	p-FLUOROPHENYLALANINE	C9H10FNO2	230.0821	183.0696	0.6286	1.9872	1	51-65-0	--	C11217	44126.0	1	-	-	34468.85	32741.66	20239.01	41267.89	40805.19	37194.1	37336.19	33426.72	31800.95	33285.28	6333.2	5385.29	10534.47	7204.44	4211.75	4268.27	2984.43	2351.54	4411.16	4899.79	1.6972192837217728	8.222441763597e-09	0.153501411582661	-2.703676172360695	down
MW7236	dIDP	C10H14N4O10P2	847.0269	412.0185	0.6286	4.0678	1	--	HMDB0003536	C01344	--	1	-	-	16733.6	30196.31	11287.47	15216.32	20949.95	18265.56	22437.02	18260.84	14738.19	30409.7	3998.61	1308.07	802.22	3188.41	581.19	1103.42	1579.06	230.64	599.24	850.23	1.613117120007886	5.142845248954292e-06	0.07174534809347301	-3.800970898056773	down
MW6447	Arg Glu Ser Leu Glu	C25H44N8O11	633.3203	632.313	0.6286	3.7033	2-search-DB	--	--	--	264281.0	1	-	-	175232.84	1150.43	308247.38	108134.82	108005.46	123955.46	88675.02	85300.52	54709.69	61229.77	822.83	2029.54	4108.83	916.98	4741.97	6722.77	6299.46	12526.78	459.65	1631.12	1.2434308350034882	0.002708510066421413	0.03611917730777968	-4.791091157075094	down
MW2183	PE-NMe(14:0/16:1(9Z))	C36H70NO8P	691.5027	675.4839	0.6285	13.3578	1	--	HMDB0112940	--	--	1	-	-	1435.66	9138.81	14234.28	24338.68	13958.24	7166.38	5338.57	7093.51	7873.94	7554.12	3933.93	18002.99	46669.6	32693.93	30832.08	20977.63	13737.85	17968.76	22219.6	19188.44	1.0259526549947915	0.008852523652624943	2.3053068519106734	1.20495879588921	up
MW2591	Stovaine;Amylocaine	C14H21NO2	272.1061	235.1572	0.6283	1.0865	1	644-26-8	--	C14169	--	1	-	-	19789.5	45549.02	24383.13	11292.63	14002.7	14205.27	19543.88	46027.35	33940.44	29109.2	43606.14	65904.37	49554.16	44424.15	114786.04	48499.34	160664.07	51640.07	70235.64	44725.16	1.1241314152857358	0.006087708994361945	2.691710913209552	1.4285234744080086	up
MW9459	TG(i-24:0/8:0/8:0)	C43H82O6	513.0323	398.1577	0.6283	1.5281	1	--	HMDB0069359	--	--	1	-	-	9137.01	1678.9	42096.13	4492.65	9059.73	4398.22	7860.45	3628.54	6901.17	11266.55	13016.45	11900.43	28577.87	27348.75	22197.83	37209.97	18882.69	51672.0	22833.23	47749.44	1.052754985330035	0.00511874746881765	2.799348185200164	1.4850909416519826	up
MW6412	Anteisopentadecanoyl-CoA	C36H64N7O17P3S	1009.3638	991.3292	0.6282	4.7853	1	--	HMDB0100000	--	--	1	-	-	446.12	548.63	8418.15	518.93	630.82	661.23	445.01	5344.18	3399.25	1604.49	184999.54	34203.97	178911.13	80019.23	45836.93	69913.04	47027.51	54621.56	235698.17	88095.88	1.2894832245753194	0.0016188119142463422	46.29766800912575	5.532867622359944	up
MW7409	Etizolam	C17H15ClN4S	360.1042	342.0706	0.6282	3.7068	1	--	HMDB0041890	D01514	--	1	-	-	58950.89	1381.23	147464.1	51512.37	60360.32	71061.87	51666.5	44908.28	43381.61	256.4	12503.34	1863.07	1254.11	909.62	1753.53	3698.62	1174.89	2133.59	904.7	636.02	1.205574194104334	0.0035329014432199397	0.050535483460134936	-4.306559458630847	down
MW1650	Iprobenfos	C13H21O3PS	304.1145	288.0949	0.6282	4.8367	1	--	HMDB0031768	C15230	--	1	-	-	131235.88	82567.44	132523.75	143305.2	129287.44	146781.25	146291.43	58460.53	64086.58	144176.6	1543.9	808.63	810.21	708.57	8127.43	13722.87	1758.58	524.24	644.39	570.75	1.6515166590399948	2.3135483576650114e-06	0.02478931949771451	-5.334137521849394	down
MW1089	Cys Ala Pro Pro Thr	C20H33N5O7S	506.2093	487.2101	0.6281	4.0371	1	--	--	--	264598.0	1	-	-	34641.91	41216.6	93079.72	33396.03	33482.43	31701.6	30432.95	20409.65	14164.46	18488.66	995.19	658.33	245.17	5920.16	172.11	316.29	336.43	270.72	9435.0	10800.26	1.3155096148272445	0.0011792284188703109	0.08304414971926619	-3.5899776527525327	down
MW6097	4-Nitro-6-oxohepta-2,4-dienedioate	C7H5NO7	237.9962	215.0066	0.628	0.7863	1	--	--	C20367	--	1	-	-	50965.89	82311.33	55229.92	49486.24	42762.2	44380.16	45194.74	46298.1	57337.79	55544.93	91128.85	238904.86	103126.32	258338.97	67329.71	120220.82	77980.68	130400.88	56451.13	124937.93	1.0621666632149935	0.007895871348613392	2.3962097692721573	1.2607542102309204	up
MW2639	Ternatin C5;Delphinidin 3-O-(6''-O-malonyl)-beta-D-glucoside-3',5'-di-O-beta-D-glucoside	C36H43O25	891.2280000000001	875.2093	0.628	2.3541	1	--	--	C16303	--	1	-	-	13414.14	274.25	349.23	11662.79	14277.7	13845.24	11344.16	22602.81	16330.34	4502.25	1820.33	821.82	245.44	1385.07	1974.31	1512.25	764.27	209.36	1120.85	2919.23	1.2238313015895128	0.002122258797953725	0.1176113052587633	-3.0879013505563147	down
MW9656	Tyr Glu Arg Arg	C26H42N10O8	737.1942	622.3187	0.6279	0.7794	1	--	--	--	256973.0	1	-	-	3047.42	4318.76	951.2	1280.93	2857.32	1582.82	2553.94	1250.0	738.36	3072.53	13051.75	104862.93	13264.29	29541.39	44083.5	28018.29	40215.88	28016.69	11545.01	13095.24	1.0885944542104902	0.007422548547698866	15.041368790317216	3.910863955596215	up
MW8523	Oleyloxyethyl Phosphorylcholine	C25H52NO5P	519.3925	477.3583	0.6279	4.7774	1	84601-19-4	--	--	63061.0	1	-	-	29799.94	16806.66	21093.87	24898.45	10240.41	31464.38	18899.57	298931.17	208132.96	6254.37	777275.25	184753.79	1004938.05	432938.35	316890.35	376866.83	415965.49	391128.2	1028178.18	397705.61	1.337907284454554	0.0006072603378342474	7.99169698550586	2.9985018827054595	up
MW789	Brassicanal A	C10H9NOS	172.0223	191.0405	0.6279	0.7535	1	--	HMDB38591	C11048	--	1	-	-	72625.39	153597.3	107165.59	73248.45	72104.15	77321.11	74574.6	63129.68	61843.3	164402.53	83552.18	35633.76	34151.63	44128.64	49916.45	29401.24	51047.42	30056.44	56458.14	45605.02	1.1637316484610478	0.003787482364624056	0.4999400768750759	-1.000172911951957	down
MW3016	UDP-2-acetamido-3-amino-2,3-dideoxy-alpha-D-glucuronate	C17H26N4O17P2	619.0691	620.0768	0.6279	4.6852	1	--	--	C20359	--	1	-	-	2313.61	2099.37	865.75	1692.28	3892.21	2761.0	2033.98	3627.75	5182.78	483.17	2139.99	5884.79	7696.04	6678.59	9372.6	14504.57	11274.75	15211.95	9827.19	9952.14	1.3980023131637356	0.00030739966205481335	3.708840208561272	1.8909681121972897	up
MW6316	AG-879	C18H24N2OS	339.1505	316.1609	0.6278	2.4748	1	148741-30-4	--	--	96449.0	1	-	-	83497.99	68366.15	234849.87	69111.38	81871.0	78195.28	61721.68	40754.33	29704.77	49914.09	4328.57	798.37	138.18	482.61	151.36	568.16	1214.13	1563.89	652.79	698.06	1.2873716672203526	0.0018633356766826238	0.013278569836528824	-6.234756419660404	down
MW2704	TG(21:0/20:0/22:0)	C66H128O6	634.1409	618.1221	0.6277	0.8583	1	--	HMDB0066458	--	--	1	-	-	16086.01	21223.86	25530.43	16944.28	17883.29	16225.96	13642.08	10052.07	6977.74	15517.59	14610.73	57070.01	13647.62	45237.61	32390.25	77404.57	30795.08	18860.98	44236.71	87569.34	1.0385224927043764	0.01025137626925501	2.635021102449718	1.3978145156680506	up
MW1480	Gly Pro Glu	C12H19N3O6	282.1092	301.1274	0.6277	5.0334	1	--	--	--	20209.0	1	-	-	152593.18	13559.78	85430.23	143941.41	145061.1	153060.8	146922.01	162242.65	152274.97	1774.36	287987.95	219547.99	205440.5	272135.43	301242.34	219700.15	312082.99	212195.86	380395.02	435158.2	1.4051599084043145	4.17390385008814e-05	2.4600083195857088	1.2986631946721363	up
MW392	4,4'-Diaminostilbene dihydrochloride	C14H14N2.2HCl	281.0621	282.0691	0.6277	4.5356	1	--	--	C15452	--	1	-	-	2210.51	16456.48	9808.36	4960.18	2572.2	7242.9	7218.47	7492.91	6817.62	9790.27	14851.9	11407.59	34667.22	34028.47	15097.96	53666.06	15053.13	44881.18	44377.83	29660.39	1.309403134456067	0.0010312976152067914	3.992116524227604	1.997153831514816	up
MW8763	Phe Lys Glu Ala Phe	C32H44N6O8	704.3384	640.3221	0.6276	3.9976	1	--	--	--	264813.0	1	-	-	53468.71	24144.04	2128.86	57034.12	50992.59	48498.37	56956.6	54484.5	42896.55	33914.7	1085.89	290.4	2002.49	3189.58	4610.02	213.98	907.35	876.01	2844.75	833.71	1.5156407047517548	4.534769614687814e-05	0.0397018235036054	-4.6546509179432105	down
MW6699	C-12 NBD-dihydro-Ceramide	C36H63N5O6	662.4847	661.4778	0.6275	4.8506	1	474943-05-0	--	--	44980.0	1	-	-	3741.69	3394.28	2655.55	3809.74	565.45	6319.18	3387.4	12015.33	11080.52	3764.24	35636.12	30408.03	74077.61	31767.61	45206.19	40389.06	39441.7	40925.69	69048.28	52378.12	1.5869554918437392	7.336825545707851e-06	9.052785562483717	3.178361781017253	up
MW5490	(+)-Luguine	C19H13NO5	358.069	335.0794	0.6275	12.5972	1	69735-28-0	--	C09575	--	1	-	-	1516.4	921.32	1502.71	1903.63	1279.34	1614.09	1335.05	968.5	573.69	570.17	2811.08	1735.94	3781.71	4053.9	3382.02	5299.75	4990.98	5530.97	1600.04	1133.94	1.2880668243009374	0.0015686487046204574	2.8166279575540223	1.4939690137522719	up
MW8605	Palmitoyl Serinol	C19H39NO3	371.3271	329.293	0.6274	6.9361	1	126127-31-9	HMDB0013654	--	64849.0	1	-	-	15712.99	15888.56	5331.2	14823.25	14016.53	20014.0	18076.15	3598.25	4177.23	22913.21	1091.62	529.39	1227.13	1271.3	1314.19	350.13	537.45	230.33	1614.51	173.49	1.4533220442718624	0.000232507942924608	0.06198034252642689	-4.012045461959147	down
MW6807	CEFIXIME TRIHYDRATE	C16H15N5O7S2	495.0754	453.0413	0.6273	4.7011	1	--	--	D07640	--	1	-	-	9135.9	18844.98	865.01	8331.48	7368.71	7529.06	749.57	14876.68	6723.12	20873.59	56282.93	89495.25	18538.42	59184.43	33022.95	26293.99	38893.15	27113.37	10131.87	11756.43	1.0822559600470325	0.0066568326782499385	3.8900333794692656	1.9597825346942863	up
MW9588	Trichlamide	C13H16Cl3NO3	717.0029	339.0196	0.6272	3.9718	1	70193-21-4	--	C18916	--	1	-	-	25255.61	6581.06	4752.42	24473.62	21024.31	25631.29	28221.58	4127.02	3773.5	7975.3	378.88	2055.81	112.16	1137.03	438.08	299.54	188.99	1141.76	2319.66	2325.49	1.2597420798983792	0.0020661959913415183	0.06848698332998608	-3.868026374982525	down
MW8661	PE-NMe2(18:0/22:6(4Z,7Z,10Z,13Z,16Z,19Z))	C47H82NO8P	934.4535	819.5778	0.6272	3.9410000000000003	1	--	HMDB0114008	--	--	1	-	-	30905.9	23655.97	42186.39	25606.62	25022.64	49319.81	45328.45	2373.34	2225.93	51850.81	7442.19	298.67	207.17	3556.64	3989.87	3034.16	4452.72	274.28	6194.63	7755.54	1.3391878489076352	0.0011638010830485664	0.1246528613737808	-3.0040120949910922	down
MW7206	Diacetoxyscirpenol	C19H26O7	430.1833	366.1679	0.6271	1.9299	1	--	HMDB0035104	--	--	1	-	-	1800.4	2674.23	577.94	1039.45	1389.8	342.09	1145.99	971.24	604.08	77.57	2149.78	7002.13	1777.65	3523.55	2797.96	8086.36	3798.87	6744.03	67.14	5584.21	1.1481090031701298	0.004453420146141183	3.9096772128602746	1.9670495020009455	up
MW6823	Cephaloglycin	C18H19N3O6S	370.0858	405.0995	0.6271	6.4332	1	--	HMDB0014827	C13440	--	1	-	-	31154.24	25098.72	33823.0	35454.03	30199.89	35070.93	33740.81	5411.5	3748.59	25195.59	11785.83	11019.72	9936.65	9212.2	10917.51	8686.27	10717.43	9034.3	342.62	10211.69	1.289025167395873	0.0014210467321447726	0.3548288066349089	-1.4948049558732477	down
MW7385	Ergocornine	C31H39N5O5	584.2848	561.2951	0.6271	4.0009	1	564-36-3	--	C09162	--	1	-	-	17262.41	3065.04	5455.2	13437.26	16137.38	17834.2	20876.21	22471.96	17008.93	10196.13	2185.83	1228.58	720.22	1703.5	289.83	374.19	81.02	141.05	151.66	97.33	1.4926292270828752	7.298443083677251e-05	0.048511068789170136	-4.365542224633882	down
MW9391	TG(i-20:0/15:0/i-21:0)	C59H114O6	270.9676	232.0042	0.627	1.5683	1	--	HMDB0063431	--	--	1	-	-	48644.09	14892.31	90277.08	40196.92	33020.51	24565.24	30477.08	28179.93	41398.67	9070.97	27483.21	22095.47	66284.34	78717.69	63612.94	118954.28	69398.83	114796.27	98069.35	89909.15	1.0696519585683604	0.006871645369684718	2.0772779818741705	1.0546942909231876	up
MW1469	Glutamylglutamic acid	C10H16N2O7	257.0776	276.0958	0.627	3.8943	1	--	HMDB0028818	C01425	--	1	-	-	276391.72	82766.7	111805.24	284282.52	266700.27	332330.83	259398.2	68228.99	72399.47	163746.73	30856.18	22452.89	19396.62	19804.85	44198.23	12106.49	56633.94	13490.18	11378.35	12615.89	1.3683815488614894	0.000547591412304662	0.12665651841199796	-2.981006767235543	down
MW8764	Phe Phe Lys	C24H32N4O4	463.2313	440.2424	0.627	0.8975	1	--	--	--	23440.0	1	-	-	21766.92	58077.38	13593.49	23470.46	24423.38	21675.19	23091.13	15297.97	15428.44	56168.76	142860.71	162111.23	61835.67	69956.97	111111.02	45724.41	106520.47	46244.17	52086.77	32451.91	1.1489399596963086	0.0033166406894679147	3.0436786465534373	1.6058160462602344	up
MW7411	Etofenprox	C25H28O3	359.2002	376.2038	0.6268	2.5152	1	80844-07-1	--	C18410	--	1	-	-	11782.95	10982.76	18161.61	13919.83	7285.91	12391.9	15220.65	9545.72	7260.7	15096.63	3555.98	1365.07	118.35	126.19	135.93	703.73	812.49	944.97	319.94	126.98	1.6454427625804593	1.3750482164915872e-06	0.0674863989459481	-3.889259415765369	down
MW6514	Asp Asp	C8H12N2O7	249.0715	248.0645	0.6268	4.3353	1	108867-30-7	--	--	23685.0	1	-	-	18996.2	153.74	5008.06	22202.59	17780.05	16805.1	16068.03	863.68	955.3	178.15	3215.38	127.7	115.61	95.51	127.42	596.61	336.52	139.1	1618.75	247.2	1.0520492653845708	0.011095369557410695	0.06685930538960863	-3.902727823095993	down
MW7458	Fluocinolone Acetonide	C24H30F2O6	516.2165	452.20099999999996	0.6268	1.4403	1	--	HMDB0014729	D01825	--	1	-	-	339464.54	977010.07	65638.79	298385.79	296584.42	297856.23	316041.41	214317.84	195594.79	1251366.79	2454690.47	3446493.66	1008040.55	1661414.2	2495839.94	957251.92	1914005.5	735909.63	1591278.53	912157.07	1.23721205567446	0.0010066508122042654	4.039517518572069	2.0141829872514805	up
MW2757	TG(a-21:0/i-16:0/8:0)[rac]	C48H92O6	696.2819999999999	680.2621	0.6268	10.3345	1	--	HMDB0064611	--	--	1	-	-	2624.22	2380.4	4168.85	2586.48	2317.34	2702.94	3403.71	2258.46	2250.73	1185.15	19686.29	19647.54	8921.26	18062.85	3372.71	27235.75	5906.39	22503.58	129.91	17792.76	1.2247173005281875	0.002660051234107725	5.535879509766492	2.4688125425855327	up
MW9487	Thiophene-2-carbonyl-CoA	C26H38N7O17P3S2	895.1310000000001	877.0978	0.6268	4.9629	1	--	--	C07347	--	1	-	-	18142.54	8433.34	7883.55	23288.52	22946.5	24846.48	26634.24	24633.28	24043.03	6627.4	2764.12	3048.24	3789.45	5111.93	2845.55	3118.46	1512.09	857.43	857.67	1464.39	1.4572685281014282	0.00010504209703657244	0.13531833559065426	-2.8855707576167857	down
MW9642	Tuliposide A	C11H18O8	325.1133	278.1002	0.6268	1.5098	1	19870-30-5	--	C08561	--	1	-	-	1632.0	3088.09	2714.05	2122.29	1382.24	883.83	926.87	4464.62	4938.52	2995.58	2526.93	2420.83	13310.93	10719.43	1614.06	16874.1	1190.8	16479.64	5892.76	15745.47	1.0024999620447677	0.016691489886340283	3.4505582730139737	1.7868297974125755	up
MW6749	Carnitine;gamma-Trimethyl-hydroxybutyrobetaine;3-Hydroxy-4-trimethylammoniobutanoate	C7H16NO3	325.233	162.113	0.6266	1.3543	1	406-76-8	--	C00487	--	1	-	-	25242.36	36208.97	20588.52	25347.94	20920.13	23266.99	27014.36	10013.31	5767.25	64225.83	202.2	7712.24	1558.33	3763.41	6073.28	1288.81	7461.0	1521.1	2164.97	4966.46	1.302349245609017	0.0016646951332775282	0.14196603299529467	-2.8163823052360195	down
MW7047	Cyanopeptolin A	C46H72N10O12	979.5217	956.5331	0.6266	4.7343	1	--	--	C15742	--	1	-	-	4193.16	10734.93	42621.15	2132.49	10107.9	1814.41	3650.12	40564.68	27404.45	8641.75	107390.06	47545.32	123385.16	22187.93	50402.22	100275.19	41568.79	62708.87	124906.41	38400.98	1.2904712189614238	0.0009814310061971672	4.732958487351665	2.242742268293362	up
MW7929	L-Homophenylalanine	C10H13NO2	197.1288	179.0946	0.6266	4.1369	1	943-73-7	--	C17235	43203.0	1	-	-	24602.12	79925.72	3316.81	23851.48	30143.66	31352.42	34548.16	72896.88	81535.43	70869.56	144501.03	95933.65	131605.14	89251.68	75876.53	119261.74	84249.42	70137.14	108952.42	76960.37	1.3126673293451758	0.0002621805859015499	2.200079886590707	1.1375559100661974	up
MW8246	Metosulam	C14H13Cl2N5O4S	439.9955	417.0065	0.6265	4.2358	1	--	HMDB0034850	C18867	--	1	-	-	10904.97	51479.21	379.26	1033.59	415.42	7458.15	1077.09	7781.71	14155.3	973.17	13029.27	148256.54	104051.67	38137.41	182857.27	46884.97	72374.76	96483.82	53191.84	38564.23	1.2030665363915043	0.00247593062285748	8.298656242293497	3.052877747359908	up
MW6359	Aliskiren	C30H53N3O6	618.3472	551.3934	0.6264	4.7816	1	--	HMDB0015387	D03208	--	1	-	-	34679.31	40623.37	16218.61	31985.71	36349.75	27341.1	2323.52	77303.58	47100.71	1236.71	150030.85	124366.33	143282.38	90518.15	94773.83	120270.79	100499.76	99863.0	139291.86	103805.45	1.6102859676931036	8.16735974320838e-08	3.701908955691633	1.8882694141746237	up
MW9326	TG(22:0/12:0/15:0)	C52H100O6	645.2335	680.2469	0.6264	4.8423	1	--	HMDB0068116	--	--	1	-	-	1298.72	6794.72	5584.62	2809.83	543.47	1759.36	1711.52	933.29	7362.89	3166.44	52575.02	33284.96	79336.44	53719.74	49145.9	62222.55	53096.19	46409.86	65607.41	86516.97	1.6506766766903955	1.1684568907279378e-06	18.20483618573646	4.186249853791793	up
MW9007	Retinyl palmitate	C36H60O2	569.4302	524.4593	0.6264	4.1146	1	--	HMDB0003648	C02588	--	1	-	-	14630.09	70411.07	336.65	19090.24	16951.15	27309.01	29105.16	38606.02	34677.65	75597.34	3372.49	1122.96	1467.67	8148.51	2123.98	3098.91	575.79	3110.36	866.48	2100.76	1.218184333875713	0.0032033534737356192	0.07954320835220048	-3.652117435772665	down
MW1372	Fulvestrant	C32H47F5O3S	622.3354	606.3166	0.6263	10.0981	1	--	HMDB0015082	--	--	1	-	-	18937.3	59398.47	56464.76	18551.04	18847.16	22879.75	18260.03	17579.34	25673.76	15076.55	67785.66	132251.26	161150.01	176364.7	56271.04	237117.47	111662.25	200680.35	4609.56	117993.09	1.2688346050392871	0.001496375621128787	4.6596752081657264	2.2202293986781108	up
MW263	2,4-Dihydroxypyrimidine-5-carboxylic acid	C5H4N2O4	192.9654	156.0171	0.6262	5.4678	1	--	--	C03030	--	1	-	-	5548.12	1362.02	636.54	3764.03	4743.63	5984.17	8001.93	3971.96	10842.88	319.91	70918.82	4885.16	20302.29	22893.63	30403.71	59027.95	26668.1	39120.64	82455.38	32099.05	1.3153991464160355	0.0015437688330787519	8.60593458489051	3.10533187416808	up
MW1084	Cyflufenamide	C20H17F5N2O2	428.1406	412.121	0.6261	0.8673	1	180409603	--	C18516	--	1	-	-	15246.68	3258.84	12513.3	12449.94	14871.89	14440.27	15875.06	27809.55	31649.17	5218.58	670.77	2009.25	3440.62	2871.97	318.46	3227.8	462.98	2386.58	2039.66	3088.23	1.3006715687376424	0.0009292106606989703	0.13380213349639428	-2.9018269747216783	down
MW9224	Telomestatin	C26H14N8O7S	600.1041	582.0706	0.6261	3.8857	1	--	--	C12040	--	1	-	-	29240.11	12355.47	1745.26	11241.65	17399.24	18901.11	7679.17	3935.99	1041.34	7610.56	891.29	101.56	264.8	170.82	653.49	1088.82	525.98	93.75	134.46	210.07	1.177467011812506	0.003896652099058983	0.03720237265170729	-4.7484615549012315	down
MW2619	Talampicillin hydrochloride	C24H23N3O6S.HCl	1033.2083	517.1074	0.6261	2.342	1	39878-70-1	--	C13978	--	1	-	-	466.85	2373.38	127.8	645.15	183.62	318.1	261.98	1534.91	741.07	4102.06	10688.44	1479.85	5911.45	6194.15	18838.34	1501.09	22010.12	1388.82	11645.65	3773.43	1.0590214065899741	0.012317294618856195	7.757504472371715	2.9555926234996126	up
MW6067	4-Hydroxy-17.beta.-estradiol	C18H24O3	599.3338	288.1725	0.626	4.6102	1	5976-61-4	HMDB05896	C14209	--	1	-	-	1692.61	7161.61	1982.43	571.56	800.9	2685.11	1451.88	857.87	5837.6	8627.89	207789.32	63153.61	210876.87	47039.35	16572.79	35309.32	28923.48	28749.48	109866.99	121976.44	1.1386799309778792	0.005550555312868219	27.479396554282893	4.7802784179042765	up
MW5828	2-O-[2-O-(alpha-D-Mannopyranosyl)-alpha-D-glucopyranosyl]-3-phospho-D-glycerate	C15H27O17P	574.1148	510.0986	0.626	4.2933	1	--	--	C19793	--	1	-	-	34501.07	26648.05	656.16	39826.16	37711.94	34331.95	1738.7	77693.21	88834.56	13938.49	426675.57	392032.9	291050.72	343055.4	146201.37	183968.66	127050.42	160634.32	68688.71	133607.24	1.307248055654084	0.0008318251942296285	6.386881695527449	2.675111727659228	up
MW9620	Trp-Nap-OH	C30H25N3O6	568.1452	523.1743	0.6259	4.6097	1	--	--	--	65332.0	1	-	-	5158.87	6474.71	10978.37	1424.06	1336.92	3285.47	1324.44	3250.81	793.8	7600.06	71021.39	18884.38	40501.15	11018.2	22926.73	8177.84	31897.59	9762.65	86771.02	41960.74	1.1362076172397744	0.005959511020109686	8.237862173356032	3.0422699888574027	up
MW2356	Pro Thr Leu	C15H27N3O5	310.1769	329.1951	0.6259	13.2222	1	--	--	--	19982.0	1	-	-	71850.45	157080.34	105325.94	78734.38	88909.48	85376.12	129005.75	130798.48	239042.71	220082.66	15326.09	72868.39	15915.95	70487.0	28060.79	21269.75	19409.27	25917.24	26095.84	22267.3	1.364785995702178	0.0003647851303492322	0.2431603779344781	-2.0400199286650613	down
MW8414	Nalmefene	C21H25NO3	406.13699999999994	339.1834	0.6259	1.4447	1	55096-26-9	--	C08027	--	1	-	-	19035.61	42870.67	962.78	14075.72	21056.38	9372.06	12544.77	10548.34	5616.0	25354.79	48660.18	91218.31	38814.48	66708.52	91038.71	41505.07	93413.15	44307.37	52699.73	44979.36	1.408593696984897	6.754192955472457e-05	3.7992803637725943	1.9257261780466155	up
MW8183	Mersalyl acid	C13H17HgNO6	468.0733	485.0762	0.6259	4.6678	1	486-67-9	--	C11336	--	1	-	-	20529.53	51705.4	59541.98	22192.16	1873.74	22141.9	27484.17	24524.34	8476.73	44836.84	151691.29	448580.43	147650.05	129021.65	133215.41	157247.9	117835.41	103611.48	110537.07	19159.05	1.0917178097206792	0.0066308635722014545	5.3600894634399685	2.42225708041888	up
MW9705	Val Ala Val His Val	C24H41N7O6	600.2305	523.3118	0.6258	4.9155	1	--	--	--	264140.0	1	-	-	2661.52	953.99	1292.45	782.18	1780.12	2910.07	2569.67	602.22	10096.47	5168.53	161463.76	5829.84	97637.51	96846.55	87850.07	112316.65	73719.17	101180.44	174517.89	105838.72	1.5234813528075095	8.043989313221038e-05	35.298359800147274	5.141529242599964	up
MW9537	Tofenacin	C17H21NO	322.1153	255.1623	0.6257	4.187	1	15301936	HMDB0060632	--	--	1	-	-	39074.71	29941.24	45835.48	36730.05	36163.22	37307.74	32414.52	3895.66	23573.46	36869.77	18142.9	15396.18	126529.99	7426.28	64714.15	122043.37	88196.23	104492.68	169416.18	129519.47	1.0139985837219505	0.016412826867118396	2.628533415411808	1.394258075386288	up
MW9466	Thalicarpine	C41H48N2O8	741.313	696.3411	0.6257	0.895	1	5373-42-2	--	C09655	--	1	-	-	4800.0	20231.04	15251.76	1430.33	1747.82	2412.64	3125.83	3685.46	3565.72	15161.71	106369.75	59204.54	29263.42	28657.63	35593.85	14379.32	32338.08	13666.79	23055.95	12188.09	1.0260376137035463	0.012038780894133991	4.967174706993794	2.3124254905804524	up
MW5623	1-Oleoylglycerophosphocholine;1-Oleoyl-sn-glycero-3-phosphocholine	C26H53NO7P	561.3188	522.356	0.6257	4.7919	1	--	--	C03916	--	1	-	-	3288.04	52171.81	226725.22	8097.41	7066.66	6535.96	8456.55	101030.44	73589.82	5201.33	407874.25	144874.03	403322.82	285755.61	158116.97	242783.27	163607.3	187189.2	490465.15	309333.18	1.3690113932363015	0.00012947411476595512	5.675600193139171	2.504772965069584	up
MW8007	Leu Glu	C11H20N2O5	261.1442	260.1372	0.6256	4.2202	2-search-DB	--	--	--	23841.0	1	-	-	197283.94	178715.69	92864.22	149716.08	127623.76	169727.21	176535.25	45578.51	42066.15	242057.53	213752.42	62008.57	47608.35	64767.2	35343.74	58524.51	50637.0	59809.44	45776.1	11936.38	1.0059888958844767	0.01041404180046406	0.4571636786683073	-1.1292173078849537	down
MW2341	Pro Asp His	C15H21N5O6	348.1316	367.1492	0.6256	1.2209999999999999	1	--	--	--	16702.0	1	-	-	14393.67	30200.67	11521.54	21659.26	20554.72	19293.02	20308.21	15486.35	15716.16	105563.76	47405.05	158166.5	100899.52	122026.97	107910.3	43112.75	188119.23	37276.59	126053.84	4810.84	1.0529438218640583	0.006797989695472617	3.406591129962078	1.768328800920025	up
MW2032	N-Sulfonyloxy-PhIP	C13H12N4O4S	319.0509	320.0579	0.6256	4.4441	1	--	--	C20288	--	1	-	-	12817.82	4502.48	8671.93	12672.78	11821.67	14096.21	14019.02	468.86	639.32	85.27	122.03	382.34	268.76	50.18	127.15	308.21	74.46	166.18	1189.02	163.87	1.231885750943018	0.002726842130254801	0.03574393298056428	-4.8061578038738215	down
MW6735	Capsazepine	C19H21ClN2O2S	394.1354	376.1012	0.6256	4.0229	1	138977-28-3	--	--	45065.0	1	-	-	216.08	838.04	9163.34	195.87	1244.87	2248.45	662.22	331.94	769.98	206.96	23195.95	6684.69	11917.24	29172.5	30075.37	6923.38	26461.01	3576.15	80622.57	10266.86	1.024551353318114	0.015587268292188703	14.41613074900411	3.849612095924233	up
MW709	Asulam	C8H10N2O4S	211.0179	230.0361	0.6256	5.5078	1	3337-71-1	--	C18350	--	1	-	-	6238.62	40572.7	230603.52	14490.9	6924.15	6593.93	5397.23	146039.05	50570.73	17185.51	438677.03	198958.41	253527.06	362934.45	40771.24	196001.24	10846.68	351774.42	167957.85	163085.72	1.0900873658405366	0.004781131735019286	4.164060349321182	2.0579909776275964	up
MW6941	CL(i-14:0/a-13:0/i-24:0/i-20:0)[rac]	C80H156O17P2	857.1352	834.1466	0.6254	4.7995	1	--	HMDB0091225	--	--	1	-	-	5877.57	10442.3	27580.42	3064.17	1901.59	7950.12	1753.78	3933.3	7465.29	5247.18	82726.67	52923.67	120759.82	123532.61	57531.11	110136.32	78647.13	67849.91	120361.68	129352.55	1.5997323452673913	3.6325006985098564e-06	12.5481943136355	3.6494078700444224	up
MW2903	Thr Tyr Glu Lys Tyr	C33H46N6O11	683.304	702.3225	0.6254	10.6756	1	--	--	--	264556.0	1	-	-	68944.47	102331.63	74538.76	86713.3	61138.87	95452.38	101227.47	55247.62	55716.84	97075.77	152381.44	178290.43	248940.85	339175.44	156074.31	396833.22	142138.98	221726.76	5770.4	179244.33	1.1264870098287436	0.006242524302381002	2.530822623125767	1.3396063973323478	up
MW6573	Bacteriohopanetetrol-acetylglucosamine	C43H75NO9	791.5786	749.5442	0.6254	11.2565	1	--	--	C21120	--	1	-	-	27224292.48	21564700.79	17838009.97	6367766.34	29654567.01	8404550.97	8274139.92	10289414.16	12886981.49	13245038.17	3817365.14	3208052.96	2214666.53	1988867.6	4080138.01	6108151.4	6895781.86	6698230.24	2962229.2	19584088.24	1.0634387081946424	0.005856455672206342	0.3695522970004648	-1.4361495538327542	down
MW8348	N-dodecanoyl-L-Homoserine lactone-3-hydrazone-fluorescein	C37H40N4O8S	701.2634	700.2567	0.6253	4.9543	1	--	--	--	64901.0	1	-	-	1411.31	1649.18	441.95	1442.35	1153.2	419.77	383.47	1013.92	1748.01	385.67	34258.69	4426.88	43666.29	35541.79	43849.05	38512.84	62117.57	39184.24	45629.06	45892.03	1.5992255305934355	1.57203400775391e-05	39.11683648743187	5.289717794205082	up
MW6755	CAY10404	C17H12F3NO3S	431.0651	367.04900000000004	0.6252	4.6438	1	--	--	--	63043.0	1	-	-	2480.47	2641.67	1600.03	1828.64	2904.92	3454.68	3663.38	1248.6	3740.64	1255.26	4383.34	7455.4	16530.44	13233.6	17137.69	21540.65	15273.58	20870.59	15836.83	11965.75	1.532956640788527	5.410798526385813e-05	5.811354045746101	2.538874350804584	up
MW9415	TG(i-21:0/13:0/i-24:0)	C61H118O6	584.2226000000002	584.2226000000002	0.6252	4.7832	1	--	HMDB0065871	--	--	1	-	-	51221.16	17637.09	3168.42	37208.18	28526.41	63961.52	58220.9	347271.57	220910.82	6880.9	764372.05	267966.15	482363.48	377511.44	520465.99	463334.35	592056.69	375711.79	669233.06	497262.67	1.5508313429556906	1.687614481214155e-06	6.000282452732102	2.5850304146486103	up
MW1199	Dihydralazine	C8H10N6	211.0717	190.0967	0.6252	2.7738	1	484-23-1	--	D07170	--	1	-	-	11235.98	2476.34	4147.02	8212.78	9621.68	10536.4	8759.27	4889.93	2309.66	8241.94	3638.2	666.04	2808.95	2299.66	3250.49	3041.72	2629.34	2877.57	2865.08	1873.05	1.2337487987964737	0.002006019961045464	0.3684471326546549	-1.4404704685891914	down
MW1760	L-Theanine	C7H14N2O3	155.0822	174.1004	0.6252	1.8289	1	3081-61-6	HMDB0034365	C01047	44433.0	1	-	-	25878.47	7697.69	23693.78	26703.69	33219.96	29025.11	29099.14	6659.16	9767.3	28311.49	1168.38	719.39	534.51	595.45	1339.13	1129.02	1307.73	1061.29	305.99	606.28	1.513362767154511	8.787734763438037e-05	0.039840669495676516	-4.649614298644411	down
MW9042	ROCCELLIC ACID	C17H32O4	339.1936	300.2301	0.6251	11.2512	1	22139-54-4	--	--	43927.0	1	-	-	3760.75	1323.76	3407.56	1390.88	1849.46	2394.63	2621.26	7108.22	1510.65	3437.04	10997.04	14591.83	8342.12	22025.83	5843.63	1689.47	16430.82	13852.06	9582.17	5190.76	1.200899060359439	0.0022410273538233773	3.768398091806718	1.9139513786286648	up
MW2630	TBS-Corey Lactone Aldehyde	C14H24O4Si	283.1368	284.1444	0.625	13.2496	1	64091-14-1	--	--	63031.0	1	-	-	8414.93	10055.05	14841.71	8230.05	9515.48	10797.44	11420.63	6005.68	9674.78	12282.39	3095.79	3133.68	1624.84	1325.34	2335.57	4595.57	3250.57	3832.2	2722.0	3992.33	1.6052885319696604	1.7519699668651108e-06	0.295421172297318	-1.7591548697536499	down
MW563	Alanyl-Valine	C8H16N2O3	187.1085	188.1161	0.625	2.3504	1	--	HMDB0028700	--	--	1	-	-	22179.78	688.35	24223.4	19180.59	16665.47	20150.2	16765.13	5449.85	2978.78	35190.68	124808.1	110644.46	105549.75	24142.77	112115.48	64389.73	130532.44	62260.97	169659.13	8984.6	1.316601960759475	0.0009992664368221199	5.5855812941439655	2.481707430491752	up
MW6766	CAY10578	C10H3I4NO4	731.6062	708.6241	0.6249	11.1506	1	19231-60-8	--	--	45324.0	1	-	-	6995496.0	8178767.06	8614249.75	7380550.79	3637445.15	8144149.15	7931267.89	2110551.4	5439097.72	2030452.58	509220.05	973479.27	94274.88	114669.22	12137.14	728071.01	20474.58	451428.44	1344625.93	1643062.89	1.4935679508120083	6.811250229584439e-05	0.0974403878694674	-3.3593363137529395	down
MW484	9(10H)-Anthracenone, 10,10-bis(4-pyridinylmethyl)-	C26H20N2O	395.1568	376.1576	0.6248	4.7181	1	122955-42-4	--	C13779	--	1	-	-	295694.07	136172.53	19609.14	308390.51	289386.75	323033.22	344661.44	220605.41	210778.63	196731.09	35736.12	36972.96	28889.59	1880.24	2350.82	3239.09	3484.4	5163.73	70166.62	2554.88	1.485899642326492	5.9599726345805506e-05	0.08120825199738042	-3.622229855088325	down
MW57	(S)-4-Hydroxymandelate;(S)-2-Hydroxy-2-(4-hydroxyphenyl)acetate;L-4-Hydroxymandelate;L-p-Hydroxymandelate	C8H8O4	187.0415	168.0423	0.6247	1.1327	1	--	--	C03198	--	1	-	-	13485.68	20117.12	24630.71	14670.38	25256.5	9955.0	16840.64	40689.63	40567.97	15970.93	117348.63	124644.94	86587.42	55770.5	101786.27	61193.57	160516.82	71817.01	108865.99	47070.77	1.4623739955838229	9.613605633286822e-05	4.210922307112609	2.0741362575594016	up
MW7333	dTDP-4-hydroxyamino-4,6-dideoxy-alpha-D-glucose	C16H27N3O15P2	581.1261	563.0917	0.6247	4.0037	1	--	--	C21348	--	1	-	-	43794.04	16787.12	30408.33	55917.67	46473.73	54231.31	64208.87	35422.73	44599.07	24535.04	3019.71	639.75	2046.15	5179.96	320.02	909.31	278.97	380.43	189.66	352.58	1.5846196104530192	1.1293783574169415e-05	0.03198185994064863	-4.9666023469814125	down
MW6125	5'-Deoxy-5-fluorocytidine	C9H12FN3O4	287.1147	245.0812	0.6247	4.9246	1	--	HMDB0060405	C16635	--	1	-	-	12468.35	6811.98	991.6	11518.68	4404.48	10921.27	9250.3	7422.57	7640.2	5525.27	21099.28	14682.04	15492.38	19784.13	24964.18	45015.53	28058.11	43443.17	24817.63	22689.28	1.4163510612037358	0.0002731313386160081	3.379205298701704	1.756684002002623	up
MW9437	TG(i-21:0/i-21:0/i-15:0)	C60H116O6	738.1805	755.1844	0.6246	0.7807	1	--	HMDB0064892	--	--	1	-	-	2652.9	7219.15	12573.69	1777.38	4018.36	1313.17	2363.87	4654.62	1016.16	4132.59	1307.88	36896.29	13542.44	31427.86	36177.8	20408.35	36180.81	19623.75	7055.22	14777.55	1.2245638429422223	0.0018249595977237962	5.2106448197816535	2.3814619177509413	up
MW9161	Spectinomycin	C14H24N2O7	399.1113	332.1584	0.6246	3.7105	1	1695-77-8	HMDB0015055	C02078	2476.0	1	-	-	283.68	401.77	65.16	565.22	62.44	386.5	487.03	1399.93	778.3	293.95	28687.14	1813.98	19280.97	12455.65	13910.39	1868.51	9069.2	2095.01	49026.03	2870.3	1.0047260105798093	0.019055227811509326	29.864051075576103	4.900337976040438	up
MW7513	GDP-4-Dehydro-6-deoxy-D-mannose	C16H23N5O15P2	629.0999	587.0666	0.6246	0.8221	1	--	HMDB0001346	C01222	--	1	-	-	3802.34	21196.33	12825.09	7268.72	6951.34	5708.09	6473.23	2005.6	754.47	21149.64	21754.96	45634.81	22872.27	66366.48	82452.52	51951.45	76057.61	48595.38	41488.88	36556.83	1.438801225262418	9.818259782682913e-05	5.601997280303989	2.4859412830031187	up
MW823	Calcium propionate	C6H10CaO4	202.0401	186.0205	0.6246	1.1	1	4075-81-4	--	C18379	--	1	-	-	13539.79	17761.46	3199.32	15251.31	6069.19	10182.4	9619.42	31923.54	25037.89	8056.0	43614.86	14622.94	28030.4	22684.88	39992.23	32357.97	72176.66	37314.46	59051.62	25240.15	1.2297409730813642	0.0021053048425039877	2.6669888834155095	1.4152118114374932	up
MW6361	all-trans-Undecaprenyl phosphate	C55H91O4P	910.6806	846.6655	0.6245	4.1167	1	--	--	C00348	--	1	-	-	4935.21	30125.85	222.86	8521.87	5112.51	7429.63	12658.27	16889.34	12076.19	34950.43	762.8	270.02	649.2	1666.96	428.6	1412.15	398.66	531.9	888.08	958.07	1.1449414397573705	0.0064769156795867295	0.05993312176088623	-4.06050266766593	down
MW2027	N-Nitrosodiethylamine (NDEA)	C4H10N2O	101.0718	102.0793	0.6245	0.8026	1	--	--	C14422	--	1	-	-	4965.86	7256.94	888.12	1422.67	2986.39	2237.91	2845.48	3412.05	1525.19	22848.62	38127.45	120335.06	5229.57	28256.42	90516.61	49791.04	86689.48	96729.37	18512.85	12999.65	1.181693897099258	0.003755898150498158	10.8592153521695	3.440847957842683	up
MW5923	3'-Deoxydihydrostreptomycin	C21H41N7O11	585.3208	567.2864	0.6245	4.2309	1	26086-49-7	--	C03755	--	1	-	-	37624.41	147681.95	2554.34	34849.07	1721.55	1327.03	23716.44	27704.45	24637.43	1967.12	23697.68	367403.16	260352.83	105539.2	405558.04	113001.71	160714.16	237535.44	131249.98	96732.49	1.1811550046300645	0.0026730463861811423	6.260323139690897	2.6462371268060765	up
MW2326	Precorrin 2;Dihydrosirohydrochlorin	C42H48N4O16	880.3251	864.3065	0.6243	3.9476	1	82542-92-5	--	C02463	--	1	-	-	25136.83	1008.7	10101.39	21489.34	18552.91	22520.18	20527.54	16985.03	14351.26	320.48	137.92	258.21	4925.1	587.71	1624.21	3044.75	133.25	86.17	4104.45	4992.78	1.2912456123364626	0.0009378852614822953	0.13175751882562484	-2.924042802376445	down
MW576	alpha-D-Galactosyl-N-acetyllactosamine	C20H35NO16	544.1887	545.1956	0.6242	0.8533	1	--	--	C04428	--	1	-	-	13496.61	4607.14	8776.77	14297.41	13061.51	16612.19	14782.36	15199.56	19161.66	4318.41	1887.55	3261.47	12458.39	3527.22	5069.66	8745.94	3180.71	6557.55	5261.54	6068.03	1.1343649353584322	0.0021713005855544558	0.4506188461087369	-1.150020442612193	down
MW9545	Torasemide	C16H20N4O3S	415.0786	348.1256	0.6242	3.2067	1	--	HMDB0014359	D00382	--	1	-	-	2732.38	1761.42	1428.34	3043.28	250.78	2246.43	267.92	3984.29	1551.06	586.07	14479.51	2612.14	21426.5	35604.55	24165.9	40941.34	23354.72	43052.12	18704.09	27981.01	1.4694054166009076	0.0001909100192380545	14.134119651780727	3.8211101221269934	up
MW9516	Thr Thr Asp Glu Tyr	C26H37N5O13	674.2521	627.2388	0.6242	4.9171	1	--	--	--	264347.0	1	-	-	3458.14	14308.02	3533.37	917.25	2261.25	1626.01	2360.65	9857.41	3675.85	1467.88	138621.26	12427.91	41610.29	49584.97	77114.09	91852.31	92305.07	83596.72	135323.26	60924.7	1.4710813131431808	0.00021586612846962775	18.022446137575198	4.1717229324009315	up
MW695	Asp Ile Lys Asp	C20H35N5O9	977.4804	489.2435	0.6242	4.1617	1	--	--	--	122442.0	1	-	-	222942.71	191735.19	204466.95	271407.37	275072.25	279176.36	308732.38	286459.48	236869.04	204386.4	200639.05	146055.9	140810.91	117172.74	112456.49	842.66	115340.91	86682.02	130308.59	2038.65	1.4527107530440857	1.845483317755449e-05	0.42412038815319936	-1.2374542576014098	down
MW8494	O-Phosphoethanolamine	C2H8NO4P	300.0718	141.0191	0.6241	1.3725	1	--	HMDB0000224	C00346	--	1	-	-	6041.13	12383.06	3166.85	7475.44	4593.43	8772.29	8375.67	15833.66	12926.94	12225.49	33622.09	32776.28	24719.85	39928.02	20931.96	22522.84	21052.21	17397.32	26505.32	22890.72	1.481767346508336	9.664381758424632e-06	2.8579942514736265	1.5150030146216815	up
MW1371	Fucoxanthin	C42H58O6	639.4049	658.4233	0.6241	10.8501	1	3351-86-8	HMDB02741	C08596	--	1	-	-	3805.1	3868.6	5651.7	4313.17	1760.23	4087.01	5089.15	2170.42	1989.51	3580.2	4476.54	17679.05	4317.78	13029.61	7355.63	28392.29	7377.97	21914.88	875.61	13475.12	1.0132723406877593	0.015208876533245303	3.2739690305049503	1.711040674973873	up
MW6947	CL(i-14:0/a-15:0/i-24:0/a-13:0)[rac]	C75H146O17P2	282.0376	218.0215	0.6241	4.1211	1	--	HMDB0092170	--	--	1	-	-	60745.28	31363.79	19120.71	60450.98	55882.18	62975.01	63721.96	1768.46	1575.74	38106.72	17222.54	12330.0	12122.35	9769.97	12157.94	9833.01	11208.31	398.99	15192.15	12548.38	1.144602823155474	0.0059422521752574425	0.285015297660668	-1.810888739585796	down
MW6457	Arg Phe Lys	C21H35N7O4	488.2379	449.2751	0.6241	4.0843	1	--	--	--	16596.0	1	-	-	81996.85	97824.13	265446.95	81485.46	100822.19	94658.38	94291.79	9527.09	10968.62	80219.89	31250.23	33604.63	20601.41	1042.15	29319.52	2788.91	27350.02	20817.26	26175.97	752.66	1.1009550785935245	0.009631942965262694	0.2111797075001034	-2.243456883749234	down
MW3051	Val Ser Glu Ile Asn	C23H40N6O10	541.2623	560.2806	0.6241	4.2113	1	--	--	--	264911.0	1	-	-	733.89	641.75	838.96	1478.49	1757.47	1191.24	2095.32	1877.86	1178.12	1111.69	15300.32	2092.78	3989.45	10704.07	11357.96	16009.24	12069.82	13256.24	8467.94	6976.49	1.4800764942034452	0.00019634059550473359	7.76644253800333	2.95725391548652	up
MW33	(4S)-4-Hydroxy-2-oxoglutarate;(S)-2-Hydroxy-4-oxopentanedioate;L-4-Hydroxy-2-oxoglutarate	C5H6O6	142.9982	162.0164	0.624	0.9213	1	--	--	C20485	--	1	-	-	1685.87	4879.35	547.4	3448.33	308.71	543.93	1520.63	2613.05	5494.53	4312.5	91332.71	91769.91	40690.51	46947.65	89402.32	49885.89	88958.67	50110.69	152396.57	51994.77	1.5019371771212384	8.871914564914764e-05	29.718418177587232	4.893285422470341	up
MW7531	Glepidotin B	C20H20O5	417.0505	340.1311	0.624	4.9286	1	87440-56-0	--	C09753	--	1	-	-	786.73	1274.88	939.57	1824.5	1480.09	1028.04	2604.32	2802.37	5764.04	203.06	6088.34	307.46	4723.19	360.03	5218.75	5525.94	5422.9	5582.32	5052.46	5106.36	1.060842207058312	0.009554514963071876	2.319257948641194	1.2136632859303813	up
MW9078	Sanggenon C	C40H36O12	708.2208	708.2207	0.624	4.6009	1	80651-76-9	--	C09834	--	1	-	-	949.39	5540.21	5291.04	1396.86	2278.93	4163.79	1652.98	6326.45	4367.92	925.0	128688.79	70204.16	112583.25	3522.68	11811.35	3938.46	40099.96	5737.27	77320.73	19772.21	1.0083028985576241	0.015866235342772244	14.400785952572267	3.848075646758813	up
MW9195	Sudan III;C.I. Solvent Red 23	C22H16N4O	416.1479	352.1324	0.6239	0.7977	1	85-86-9	--	C19527	--	1	-	-	6779.98	13736.16	2053.77	6677.19	4110.34	6317.56	10077.04	8861.28	5239.03	14205.17	13823.69	18396.47	19800.8	16011.6	36121.2	12435.63	41112.92	13021.3	22373.1	35626.12	1.229791511531271	0.0014539268344447391	2.9301831521165416	1.5509908436209408	up
MW9640	Tubastatin A	C20H21N3O2	688.3612	335.1634	0.6239	4.0687	1	--	--	--	64761.0	1	-	-	26865.59	7893.24	4906.41	26219.43	23627.33	26970.0	26341.26	3253.94	1395.92	29996.42	1237.65	1334.58	1046.75	1739.23	330.69	662.94	530.46	450.46	599.42	457.54	1.3151015536410324	0.0013639554019804305	0.047274140677887586	-4.402804955841204	down
MW9420	TG(i-21:0/18:0/12:0)	C54H104O6	576.99	554.0003	0.6238	4.7780000000000005	1	--	HMDB0066591	--	--	1	-	-	36999.08	37058.47	76365.2	38200.21	23319.94	39823.63	41995.85	299201.37	186852.46	32465.72	944545.52	265305.09	1194984.47	691375.63	526643.91	535646.18	485094.7	432648.55	1194069.19	538648.81	1.4323330334925528	0.0001793888128311644	8.382510798929133	3.0673824365996114	up
MW8257	Midodrine	C12H18N2O4	531.2431	254.1267	0.6238	4.1202	1	--	HMDB0014356	C07890	--	1	-	-	190677.02	74780.07	277370.51	186109.01	175935.51	188610.11	201644.45	76450.83	60315.14	54956.0	29957.25	490.9	1318.29	11146.89	3741.15	2291.14	2608.41	820.46	1023.98	761.14	1.450558066893934	0.00020219886950590668	0.036425772051513115	-4.778896638951369	down
MW1467	Glutaminyltyrosine	C14H19N3O5	617.2571	309.1325	0.6237	4.8107	1	--	HMDB0028809	--	--	1	-	-	31262.02	5844.23	4262.95	14060.72	12024.75	14526.66	14678.36	5213.65	12006.54	17518.02	389.76	389.13	462.4	748.48	414.91	793.3	438.02	1255.31	334.45	4271.86	1.3374435257318509	0.0007695163925535178	0.07228136827148683	-3.7902323733922887	down
MW7872	JWH 007	C25H25NO	749.3498	355.1936	0.6237	3.7904	1	155471-10-6	--	--	64750.0	1	-	-	58422.83	2740.34	106482.75	70956.33	71887.75	83270.73	62915.68	37750.13	9367.7	512.75	1072.76	931.78	1596.45	691.7	1156.82	2539.57	1381.77	1466.65	690.71	752.47	1.2663833978795305	0.0020714239296079295	0.024351595840462176	-5.359839869800571	down
MW1796	Leu Glu His	C17H27N5O6	378.1779	397.1961	0.6237	4.2071	1	--	--	--	16180.0	1	-	-	10461.05	739.21	979.46	9645.35	11411.28	11289.06	12972.03	21457.29	14983.38	4100.54	1635.83	519.15	2369.1	163.39	1066.91	205.96	1283.26	290.84	397.94	210.96	1.253311757590757	0.0016102145384164323	0.08306254727089775	-3.589658074347895	down
MW9693	Uracil 5-carbaldehyde;5-Formyluracil	C5H4N2O3	281.0514	140.0222	0.6237	12.5358	1	1195-08-0	--	C17206	--	1	-	-	13796.1	7965.17	10641.03	49737.85	16881.86	12142.89	10553.64	7528.11	7619.31	3005.08	25607.82	21414.32	77505.0	41099.25	28295.75	47114.23	42197.78	43196.37	46720.68	29247.67	1.2368450352632154	0.0008965454851082268	2.8769277042624415	1.5245289673363047	up
MW8355	N-Hydroxyl-tryptamine	C10H12N2O	159.092	176.095	0.6236	4.1295	1	--	METPA1432	C17203	--	1	-	-	158193.74	196021.59	157107.53	147680.97	137699.86	165478.15	180530.02	185457.82	148115.85	218902.0	161821.63	85601.51	77203.25	80631.31	56341.59	69391.6	63712.42	66245.54	83166.25	56295.34	1.5336242979528492	1.4972856727486964e-06	0.4721663095291882	-1.0826329902314011	down
MW996	CL(i-14:0/i-14:0/i-17:0/a-15:0)[rac]	C69H134O17P2	551.1727	532.1733	0.6236	0.8293	1	--	HMDB0091409	--	--	1	-	-	144244.88	373574.83	263722.67	145511.6	162212.02	135474.97	218830.79	97712.83	105189.98	352863.15	453289.18	388129.81	297769.62	457600.22	635757.29	427761.76	617451.36	440780.48	483545.96	378623.6	1.4195159122989178	2.1202751042934906e-05	2.2911133192645408	1.1960488166076286	up
MW1499	Gomisin G	C30H32O9	552.2244	536.2046	0.6235	1.5373	1	--	--	C17819	--	1	-	-	33587.91	34164.29	10069.27	28887.68	31854.45	27331.7	28302.61	18088.34	21262.35	53765.17	401.54	4218.61	5297.75	876.48	744.39	4020.46	1740.08	6772.64	1728.07	8144.89	1.512270312520928	5.199865235473507e-05	0.11814578187463833	-3.081359972788245	down
MW6569	Azithromycin	C38H72N2O12	815.4611	748.5085	0.6235	4.9678	1	83905-01-5	HMDB01916	C06838	--	1	-	-	4195.77	1511.54	1757.38	597.97	1706.82	1486.89	818.33	2303.08	1299.68	5226.75	48076.25	42575.66	90390.51	26511.75	43416.67	20113.21	2778.88	56514.43	44262.65	58705.45	1.3823912323729524	0.00038968942478719037	20.73005676846913	4.3736521621053965	up
MW8165	MECLOFENOXATE	C12H16ClNO3	302.0528	257.0819	0.6235	4.7662	1	51-68-3	--	C08195	43853.0	1	-	-	18569.58	17854.1	1212.42	19965.86	17863.77	17610.63	18269.04	15965.46	16981.25	13038.99	3780.95	5657.39	6000.54	1342.74	2221.84	10480.48	3635.76	12995.33	1439.46	5952.19	1.3189648056616012	0.0001414635076474545	0.3400896580523494	-1.5560129597720551	down
MW1767	Lacosamide	C13H18N2O3	231.1135	250.1317	0.6233	5.0091	1	175481-36-4	--	D07299	--	1	-	-	12245.51	9604.25	13789.79	11776.19	11291.0	9055.32	13177.63	2005.46	2704.1	13253.85	214.23	670.0	457.71	1084.17	1572.43	1103.11	471.63	2065.38	2338.21	521.46	1.5041720908550331	8.875159148413202e-05	0.1061476333906622	-3.235855888821808	down
MW5804	2-hydroxyhexadecanoic acid	C16H32O3	290.2687	272.2351	0.6233	6.0886	1	764-67-0	HMDB0031057	--	34495.0	1	-	-	10724.22	20789.77	6661.86	9124.27	11428.01	8805.73	6040.34	8729.31	10261.42	18295.42	7236.58	31719.2	38429.01	20105.36	27236.09	9655.96	21487.42	15420.4	32817.12	28748.25	1.0765980061013594	0.004923606744681007	2.100438885498738	1.0706908096899008	up
MW7536	Gln Cys Tyr	C17H24N4O6S1	451.1045	412.1417	0.6231	4.7094	1	--	--	--	15927.0	1	-	-	3742.17	1528.0	676.56	582.74	1173.84	554.09	652.49	33880.54	23399.02	41976.0	55690.8	198446.17	189782.93	77944.45	394749.66	165893.92	217291.45	249622.83	137368.69	119382.8	1.4090949846272645	0.0003270574846670989	16.698249764596735	4.061624988708573	up
MW7116	D-Phenylalanine;D-alpha-Amino-beta-phenylpropionic acid	C9H11NO2	183.1132	165.079	0.6231	4.095	1	673-06-3	--	C02265	--	1	-	-	53349.11	32929.59	14116.32	55045.45	46835.98	56571.09	62101.31	10075.64	9034.61	47558.55	770.39	1065.11	421.42	648.57	1026.17	732.48	737.46	1343.68	538.52	4237.55	1.4401348321642176	0.00026804631064983434	0.02972349169342521	-5.072252586923238	down
MW7004	Cobalt-precorrin 6;Cobalt-precorrin 6A	C44H53CoN4O16	917.2642	952.2789	0.6231	1.0952	1	--	--	C11542	--	1	-	-	4119.28	1153.31	7626.14	3370.1	3062.55	2615.86	1968.97	2289.58	5217.71	876.85	12601.8	10469.91	31341.72	13674.6	22210.13	16798.73	29838.55	17767.28	30215.39	8054.16	1.4466321890935565	0.00019422904976867068	5.974308947116673	2.5787718451057406	up
MW6966	CL(i-14:0/i-14:0/i-17:0/i-19:0)	C73H142O17P2	723.1913	740.1952	0.6231	4.0626	1	--	HMDB0091420	--	--	1	-	-	43669.9	48074.48	923.24	56369.36	42475.72	53747.0	44928.92	40390.85	48680.45	97905.69	45157.36	13939.42	31795.68	10858.0	4633.04	6228.2	5976.73	4824.14	4128.97	13583.94	1.2136888170358786	0.0014458283248879795	0.2957578606723146	-1.7575115817668971	down
MW600	Amodiaquine	C20H22ClN3O	371.1648	355.1451	0.6231	4.5356	1	--	HMDB0014751	C07626	--	1	-	-	30039.8	6565.37	26561.19	27413.04	30188.04	35383.21	32046.23	5012.01	2489.57	43467.19	560.43	200.96	413.83	251.93	143.65	227.56	192.06	2126.48	3902.6	1306.05	1.3948893467769097	0.0005914901783284723	0.038992012439913515	-4.680677573326966	down
MW6335	Ala Leu Ala	C12H23N3O4	291.2024	273.1689	0.6231	1.2636	1	--	--	--	18225.0	1	-	-	15603.78	202.54	13694.43	18235.79	15689.09	13559.84	16831.24	4580.28	195.92	1474.58	147.96	2220.54	1545.64	276.99	3559.3	1835.8	1271.59	2094.69	98.04	524.59	1.1583244256628868	0.0050714761481100564	0.13565984317184335	-2.8819343647758218	down
MW1342	Flunitrazepam	C16H12FN3O3	294.0687	313.0863	0.623	1.2663	1	1622-62-4	HMDB0015510	D01230	85044.0	1	-	-	79904.64	127519.75	156210.76	122164.61	109622.15	105877.74	127351.75	43115.37	63438.53	149394.84	546414.79	155687.21	210101.68	324475.34	375155.42	263523.52	202911.38	282009.08	382459.22	175335.93	1.321474255615245	0.0007797628392561838	2.6904602557030834	1.4278529950203112	up
MW2551	Ser Val Gln Glu Ser	C21H36N6O11	529.2268	548.2442	0.6229	4.2219	1	--	--	--	264450.0	1	-	-	22574.57	13853.32	64445.18	22756.05	21744.65	22951.42	27838.93	8744.26	8376.05	10550.97	4388.34	889.16	332.82	676.6	996.67	1857.96	2278.94	1850.9	1169.56	1989.98	1.239206662791448	0.002999680904464419	0.07340630659850944	-3.7679521742874216	down
MW8168	Medrysone;11beta-Hydroxy-6alpha-methylpregn-4-ene-3,20-dione	C22H32O3	706.5035	344.2351	0.6229	4.1031	1	2668-66-8	HMDB14398	C14643	--	1	-	-	62512.77	20870.42	1034.23	59504.41	52999.96	61114.54	73697.31	77195.47	60358.11	62183.96	30203.18	14176.75	38809.14	13104.38	6025.22	1718.4	7522.02	4850.97	11225.32	10229.24	1.3134597251600801	0.000406349080943154	0.25940187387018804	-1.9467391935033669	down
MW9694	Urate-3-ribonucleoside;Uric acid ribonucleoside	C10H12N4O7	300.0698	300.0706	0.6228	0.8189	1	--	HMDB29920	C05513	--	1	-	-	28889.9	15670.0	30002.19	26368.12	21617.44	27437.89	30079.6	25933.83	31605.78	28831.99	60585.8	97717.42	84542.51	108438.61	30837.67	78698.53	78741.35	81893.74	74378.75	33932.77	1.4223150627237324	0.00020687708032382545	2.738988436804924	1.4536431754264945	up
MW7388	Eriojaposide A	C24H38O11	1005.4892	502.2414	0.6228	4.3841	1	--	HMDB38028	C17888	--	1	-	-	3294.17	22591.86	19157.78	3377.18	4666.74	3684.23	4010.37	38728.32	16321.13	9987.32	27862.93	45238.89	34836.54	53711.09	19257.86	81269.63	23715.42	71496.5	40922.31	28289.8	1.2348046485463684	0.0012685691785889136	3.390589902486984	1.761536298539949	up
MW8087	Lys-Phe4Cl-OH	C20H22ClN3O6	480.0914	435.1197	0.6228	0.7566	1	--	--	--	64976.0	1	-	-	2267.69	8376.13	5964.64	1844.31	4496.39	4222.73	2943.17	466.11	1023.16	7779.2	28010.2	117977.91	27920.31	42192.08	131019.86	74223.39	75676.53	67130.48	21119.51	40064.39	1.328071387487011	0.000893371471782898	15.87807542899278	3.988964149854744	up
MW9648	Tyr Ala Glu Leu Arg	C29H46N8O9	651.3466	650.3388	0.6227	4.1131	1	--	--	--	264972.0	1	-	-	22039.53	98112.55	37475.56	29091.12	11973.67	31594.55	22371.31	47064.24	41412.82	97902.05	2102.39	32243.31	3322.33	6692.57	1498.09	3002.07	1845.99	2794.43	277.89	1823.27	1.2117706387038565	0.002946826586442326	0.12664602150067403	-2.9811263384165163	down
MW8690	PE(24:1(15Z)/20:4(5Z,8Z,11Z,14Z))	C49H88NO8P	687.444	610.5172	0.6227	5.4655	1	--	HMDB0009762	--	--	1	-	-	3968.03	120.69	281.68	3432.14	4417.7	3706.37	4316.6	2127.89	2535.76	233.46	28225.0	447.33	3819.28	9730.73	11069.95	50145.4	11760.64	45941.91	20891.23	12441.19	1.1003335789625843	0.011760271459937357	7.735488649309157	2.9514924293172475	up
MW1487	Glycerol tributanoate	C15H26O6	603.3391	302.1729	0.6227	4.6504	1	--	HMDB0031094	C13870	--	1	-	-	10418.59	304.63	683.34	9901.59	10160.43	9297.03	12615.57	4676.49	6028.54	894.55	367.96	1381.17	532.76	1399.94	100.66	82.32	1286.51	93.6	1799.29	1771.84	1.1732963160119632	0.003918246325024036	0.1356716972839345	-2.8818083059423363	down
MW1470	Glutamylphenylalanine	C14H18N2O5	275.1033	294.1216	0.6227	6.6129	1	--	HMDB0029156	--	--	1	-	-	175472.64	99066.62	138498.62	244110.1	227345.36	207542.03	179243.36	32931.35	22591.44	248688.49	65094.57	57888.1	35358.18	42522.9	1627.94	32972.33	1022.58	36803.23	487.75	961.72	1.3469465423968932	0.0006458182842912858	0.1743833970740316	-2.519665406258734	down
MW7002	CMP-3-deoxy-D-manno-octulosonate;CMP-KDO;CMP-beta-KDO	C17H26N3O15P	526.1074	543.1102	0.6227	4.0939	1	--	--	C04121	--	1	-	-	8058.29	35077.01	3255.16	309.29	785.6	6247.48	857.54	34595.78	62274.68	738.84	97066.74	75980.41	42676.45	41576.23	41839.92	29078.09	50579.76	21680.12	47684.79	5180.33	1.0050449917744697	0.011505738866072158	2.978605932588421	1.5746372687011942	up
MW55	(S)-2-Hydroxypropylphosphonate	C3H9O4P	279.04	140.0238	0.6227	1.5023	1	--	--	C06452	--	1	-	-	33612.81	4548.4	1015.44	26500.26	29620.63	26365.72	25822.8	37874.85	41091.62	2139.81	21857.32	1358.86	736.26	3486.52	4333.38	7706.76	3292.89	8379.16	4488.43	3627.93	1.048454505820093	0.006059692573039565	0.259271636136189	-1.9474637083794923	down
MW2485	Ro 31-6045	C21H15N3O2	681.2261	341.1164	0.6225	1.5185	1	113963-68-1	--	--	45525.0	1	-	-	541.91	10298.84	2826.62	1748.49	1442.22	1683.23	913.83	3763.71	2613.42	15348.53	21331.32	23473.37	3706.77	23211.58	31103.74	5099.25	34741.51	5718.91	39233.86	8967.38	1.126912704415203	0.004572024148177005	4.773770543554279	2.255129223388267	up
MW8618	Papyriferic acid	C35H56O8	643.3613	604.3975	0.6225	4.828	1	78782-15-7	--	C08632	--	1	-	-	1810.43	2289.26	13250.87	1308.24	2648.97	2750.84	1432.81	4216.24	4960.41	1241.43	47842.61	31418.91	47903.63	49822.76	33241.14	41577.18	25947.18	26735.63	57110.61	49047.84	1.6338423794417738	5.900477834135456e-07	11.435622606831059	3.5154630095949937	up
MW6207	7-hydroxymethotrexate	C20H22N8O6	512.2005	470.1662	0.6225	0.8019	1	--	HMDB0061104	--	--	1	-	-	2781.31	16165.56	822.52	5192.21	1558.06	785.27	2427.42	1388.86	2640.77	2388.53	3198.31	199934.82	52700.78	50401.05	76243.3	48997.89	91993.3	57996.43	1954.1	20319.83	1.0271331848106515	0.011835399622717105	16.700727320306132	4.061839028637577	up
MW9784	Zoledronate	C5H10N2O7P2	566.9824	271.9963	0.6224	4.8091	1	--	HMDB0014543	D08689	--	1	-	-	2794.48	8326.53	11010.57	5341.19	2924.19	1742.07	623.26	17426.64	15465.78	5149.32	113590.11	78835.85	178052.93	124043.97	79370.08	128647.16	83857.25	96785.67	66330.3	156209.0	1.5932201746921213	7.008507810747777e-06	15.616657978366485	3.965013839410045	up
MW8249	Metrizoic acid	C12H11I3N2O4	650.7752	627.7853	0.6223	4.1146	1	1949-45-7	--	C14165	--	1	-	-	40120.23	185312.79	80670.03	51117.08	36076.49	57670.09	50548.93	99866.01	82243.92	193480.25	5434.26	12636.37	4256.07	15077.98	9072.45	13620.55	3382.32	13667.56	2989.9	1168.03	1.2879265751499638	0.0017076139454600494	0.09269746950259662	-3.431326233727415	down
MW875	CDP-DG(a-13:0/18:2(9Z,11Z))	C43H75N3O15P2	972.4151	935.4673	0.6223	4.5512	1	--	HMDB0116045	--	--	1	-	-	27466.57	8098.82	14214.68	28361.88	25709.1	25545.4	27686.03	19621.77	18911.43	1713.76	174.75	2721.86	154.17	2345.06	365.82	246.32	581.39	410.79	3568.7	224.7	1.461663532394661	0.00011034606970319782	0.05469817377477988	-4.192363523668241	down
MW7257	Dihydromethanophenazine;2-(Dihydropentaprenyloxy)-dihydrophenazine	C37H52N2O	540.4069999999999	540.408	0.6222	4.9171	1	--	--	C11904	--	1	-	-	7720.58	902.74	8354.76	7569.02	7467.3	6691.27	7463.16	734.17	2320.84	6914.15	56885.8	4761.38	47046.53	42271.62	23849.69	49977.63	20493.75	36064.61	68085.22	45945.55	1.4322199275955014	0.00025944061315337204	7.043034137844978	2.816197075540015	up
MW1194	Difenoconazole	C19H17Cl2N3O3	386.0464	405.0647	0.6222	6.1572	1	119446-68-3	--	C18459	72265.0	1	-	-	16334.91	513.45	13065.17	15936.08	17002.25	16245.45	21814.67	2386.51	1224.3	603.8	3562.24	310.22	3979.49	2546.59	225.82	3922.11	207.35	3734.22	3159.91	566.15	1.04563968610309	0.011825378548664648	0.21130810007249354	-2.242580023731707	down
MW5494	(+/-)-5-[(tert-Butylamino)-2'-hydroxypropoxy]-3,4-dihydro-1(2H)-naphthalenone;(+/-)-Bunolol	C17H25NO3	256.1692	291.1834	0.6222	3.7965	1	--	--	C04883	--	1	-	-	61198.97	96751.49	529788.01	78027.06	51813.59	83095.08	98860.68	117969.45	76247.4	161273.61	806.22	754.71	12835.11	1860.81	1100.44	1838.36	627.88	621.36	23893.74	350.86	1.034322170203771	0.017076452705165775	0.03298055665881496	-4.922240440419165	down
MW6795	CE 14:1	C41H70O2	661.4915	594.5376	0.6221	10.7508	1	--	HMDB0062458	--	--	1	-	-	87875.84	183037.12	71349.29	78192.09	70929.79	138292.33	141337.72	75086.14	134370.42	91164.28	332095.19	355477.81	201431.2	259405.33	253007.69	286188.93	256012.75	335010.87	8124.65	178860.91	1.2242412858831957	0.00168547337475807	2.300797644705564	1.2021341040238271	up
MW8722	PG(16:1(9Z)/0:0)	C22H43O9P	521.2272	482.2645	0.6221	4.3797	1	--	--	--	80001.0	1	-	-	23442.24	12624.25	7528.95	20644.33	23452.51	20413.74	26505.73	3250.91	1642.65	39311.72	4280.83	3071.3	2229.71	530.14	829.87	1941.55	271.08	2614.3	3440.0	206.16	1.2863011379690958	0.0018769806877216707	0.10857433433493442	-3.2032449871762187	down
MW8222	METHYL 3 ,12-DIHYDROXY-11-KETOISOALLOSPIROSTAN-3-HEMISUCCINATE	C32H48O8	624.3513	560.3349	0.6221	4.1192	1	--	--	--	44253.0	1	-	-	52021.96	12336.34	38550.12	40021.1	42414.08	59780.02	41189.44	93687.36	65451.21	18455.08	425.01	1358.69	2289.72	2497.53	279.77	1623.16	644.42	2311.78	1672.71	1164.14	1.4374789297928885	0.0001791348557111901	0.03075387721811568	-5.023087883689326	down
MW7200	DG(i-19:0/a-25:0/0:0)	C47H92O5	736.6933	736.6945	0.6221	4.8327	1	--	HMDB0094113	--	--	1	-	-	1350.27	6730.44	3009.1	5356.51	3561.9	4175.36	4271.16	6063.12	5453.24	7652.1	79720.26	39607.7	91960.09	86179.52	43805.35	82244.46	55964.65	56432.48	50664.08	95856.67	1.6157032550527453	4.913055588573648e-06	14.329890893514087	3.840955719980415	up
MW1468	Glutamylalanine	C8H14N2O5	199.072	218.0903	0.622	1.8269	1	--	HMDB0003764	--	--	1	-	-	477965.37	178689.48	401960.44	627008.93	474098.72	486744.48	483142.87	125034.19	179670.03	328910.15	13601.31	8507.35	9116.02	11712.31	15896.39	9587.14	11065.53	9371.67	6197.05	3381.38	1.5208940833638922	6.653350541263391e-05	0.02615739396223025	-5.256637376195963	down
MW2198	PE(14:0/0:0)	C19H40NO7P	424.2465	425.2542	0.6219	8.1049	1	--	--	--	40777.0	1	-	-	40110.93	73585.08	3118.69	42404.57	34802.9	70905.92	73895.56	9194.96	6785.79	92292.09	26185.35	8908.31	8035.88	6786.47	3975.29	4527.79	1461.17	3135.91	5094.09	2872.37	1.1786329377456952	0.004672358685034342	0.1587635590697659	-2.655048285570336	down
MW9310	TG(21:0/a-17:0/19:0)[rac]	C60H116O6	534.1536	551.1574	0.6218	4.7338	1	--	HMDB0066804	--	--	1	-	-	13331.58	23718.28	4813.25	3565.43	33049.99	5588.35	3804.16	234131.12	208539.25	203833.85	1118763.16	1935231.12	763644.77	993502.04	1437954.39	1128506.5	2032417.4	894256.31	1542207.18	665283.31	1.556592342148397	1.814492261048261e-05	17.037292596158537	4.090624189346178	up
MW1471	Glutamylproline	C10H16N2O5	225.0877	244.1059	0.6218	4.0952	1	--	HMDB0028827	--	--	1	-	-	368159.55	168000.76	169317.35	364786.76	354629.27	379542.63	369916.83	172614.11	148516.85	253973.7	91877.29	52946.4	46603.66	65513.97	56098.09	50804.33	56285.59	47903.5	59840.08	38596.75	1.502344532970259	7.008376924742544e-05	0.2060295880663104	-2.2790765560649637	down
MW5837	2-Oxo-10-methylthiodecanoic acid;10-Methylthio-2-decanoic acid	C11H20O3S	277.0842	232.1133	0.6218	0.9185	1	--	--	C17232	--	1	-	-	112385.05	219051.0	87084.43	114256.25	129120.3	101499.49	69783.19	63621.4	64774.32	210665.07	115669.11	318879.82	183269.62	258988.35	374630.47	221879.76	383204.44	242024.05	186460.05	350501.45	1.2479740626743547	0.0005750784610579746	2.2482648569128947	1.1688120023056299	up
MW9026	Ribosylhopane	C35H60O4	586.4825	544.4492	0.6217	11.2275	1	--	--	C21118	--	1	-	-	41879.43	104093.95	984.35	32195.51	35856.49	46222.72	44645.04	19458.57	11742.82	129388.24	16038.78	263.14	8148.2	5270.57	14385.34	4511.39	19111.08	1882.86	15744.13	725.0	1.0267808156556015	0.015300543926289616	0.1845371009214969	-2.4380171976558853	down
MW6478	Ascorbate 2-sulfate	C6H8O9S	294.9517	255.9889	0.6217	13.1961	1	--	--	C02812	--	1	-	-	2793.43	4005.7	4620.93	4794.58	5095.1	4337.47	4141.46	4377.53	5436.9	3578.77	14272.38	13575.62	14749.48	14421.05	13153.67	11345.04	11475.72	11126.67	6351.07	4501.08	1.4812190102211038	8.817765714962525e-05	2.662501183945948	1.412782166868079	up
MW9496	Thr Arg Glu Glu Lys	C26H47N9O11	700.3033	661.3395	0.6216	0.7807	1	--	--	--	264414.0	1	-	-	3103.06	15236.26	3054.54	4161.68	4631.96	2473.64	4247.33	1642.45	2739.7	16277.65	23758.4	27049.74	12764.54	18997.78	17620.39	4912.92	21054.46	5315.81	18669.29	5164.71	1.0405277714892447	0.005892431411713775	2.6978062741854147	1.4317867540287472	up
MW7301	DL-3-Hydroxybutyryl-CoA	C25H42N7O18P3S	920.1045	853.1519999999999	0.6215	5.1996	1	103404-51-9	--	--	456.0	1	-	-	16774.88	18244.83	12831.21	10561.9	18099.89	16563.18	23411.53	20786.18	29921.65	6657.68	60543.01	104134.9	77260.08	80505.35	54225.83	50877.22	48970.06	36410.5	68503.85	35559.43	1.4549726986577418	6.869709445676398e-05	3.548920515748569	1.827380263094408	up
MW9332	TG(22:0/22:0/i-16:0)	C63H122O6	599.0109	560.0472	0.6214	4.7343	1	--	HMDB0067711	--	--	1	-	-	1288.37	1102.23	39428.31	1048.1	2079.0	2629.4	1570.13	5709.97	6117.44	2299.57	46456.04	119564.11	199002.99	47684.55	70474.78	63746.48	69971.03	57122.79	167887.47	63004.98	1.3231690616413716	0.0006911081971205125	14.301867856693553	3.838131673472224	up
MW9755	Vindesine	C43H55N5O7	800.4222	753.4101	0.6213	4.9281	1	--	HMDB0014454	D06304	--	1	-	-	21991.61	62944.96	17268.54	30476.44	31116.29	42684.1	25874.06	77252.12	75005.4	38824.88	938.79	385.06	1192.87	2780.54	7201.88	727.81	5659.98	1002.8	544.33	2207.98	1.4064039057854147	0.00024932883979953644	0.05347186273139139	-4.2250762548273775	down
MW6055	4-Chlorochalcone;3-(4-Chlorophenyl)-1-phenyl-2-propen-1-one	C15H11ClO	309.0027	242.0498	0.6213	1.3468	1	956-04-7	--	C14585	--	1	-	-	27647.16	267.39	9399.31	35749.53	28497.65	35597.96	30107.32	2378.59	1428.59	15751.84	267.06	3419.99	3183.34	268.88	4271.14	3575.9	5022.24	3892.32	287.78	6600.02	1.1141710347827642	0.0077026865948835906	0.1647992183501446	-2.601218695115287	down
MW9679	UDP-3-O-(3-hydroxytetradecanoyl)-N-acetylglucosamine;UDP-3-O-(beta-hydroxymyristoyl)-N-acetylglucosamine;UDP-3-O-[(3R)-3-hydroxymyristoyl]-N-acetylglucosamine	C31H53N3O19P2	856.265	833.2749	0.6213	0.7968	1	--	--	C04738	--	1	-	-	2846.61	13334.8	456.66	1293.06	3306.62	986.9	1650.11	454.86	1011.04	11200.31	10842.58	24020.07	7810.3	12794.9	19674.13	5761.98	16594.29	5585.23	10005.89	13793.65	1.1408953104134318	0.001601106971988352	3.4723495298564875	1.795912178084771	up
MW9141	Sirohydrochlorin	C42H46N4O16	939.2109	862.2909	0.6212	4.7343	1	65207-12-7	METPA0681	C05778	--	1	-	-	2851.32	1992.31	837.18	3354.64	3247.39	4829.2	1329.05	15042.99	8633.78	1072.58	80284.02	61060.97	81111.26	83833.49	52384.93	65629.13	58186.29	28684.01	70929.93	44206.67	1.6391778832616417	1.2668626904459688e-06	14.501141919369195	3.8580946073030153	up
MW8900	Pro Val	C10H18N2O3	261.1449	214.1317	0.6211	3.2286	1	20488-27-1	--	--	23999.0	1	-	-	595075.16	7755.47	299257.17	828364.43	754879.62	741070.26	632266.56	34978.72	3785.0	100657.33	2909.83	100620.39	58464.71	60379.83	85247.62	65120.52	79151.0	66178.26	83752.21	2330.54	1.0489081520243564	0.012236541719107548	0.15111089352942286	-2.7263204272742256	down
MW2912	Tilmicosin	C46H80N2O13	867.5579	868.566	0.621	4.8266	1	--	--	D02492	--	1	-	-	7095.15	6792.97	16916.01	7249.07	7580.83	7512.92	7286.54	900.5	4403.6	6467.47	555.54	228.57	211.8	208.99	2330.98	449.07	2370.29	2663.63	2520.14	2789.87	1.2971919783179136	0.0011622657725062005	0.19844703404442848	-2.3331740946628483	down
MW6381	alpha,alpha'-Trehalose 6-mycolate	C44H82O13	885.528	818.5755	0.621	4.5266	1	--	--	C04218	--	1	-	-	4671.32	5685.53	722.25	4444.98	2928.51	3303.99	3066.42	4777.07	2858.31	2292.7	5609.09	10960.1	11323.01	10215.93	9757.58	2616.35	5533.34	1446.09	8464.54	14874.19	1.045819751952085	0.007293380483993117	2.3251139245168786	1.2173014062460048	up
MW5521	(9Z,12Z)-(8R)-Hydroxyoctadeca-9,12-dienoic acid;Laetisaric acid;8-Hydroxylinoleic acid	C18H32O3	615.4589	296.2351	0.621	4.0626	1	138231-04-6	--	C08318	--	1	-	-	59984.13	79665.31	30048.98	63099.28	70694.27	79727.14	86177.6	81011.34	62519.11	77166.54	65316.63	15914.78	35669.05	11928.45	2897.12	4311.56	3546.16	5396.58	6873.69	15951.32	1.4843318168660906	5.323193160631168e-06	0.2431631240801068	-2.0400036355981466	down
MW1619	Ile Thr Val Lys Leu	C27H52N6O7	609.3389	572.3897	0.621	5.3908	1	--	--	--	264861.0	1	-	-	4622.59	714.51	1325.6	3603.4	2813.21	4860.9	4751.33	3085.61	2173.94	114.06	751.15	254.64	66.83	73.13	81.65	114.06	95.42	83.02	175.36	69.67	1.3219935172234891	0.0008517485772339378	0.06288688996851967	-3.9910968999951737	down
MW6582	BEC	C5H12BNO4S	238.0289	193.058	0.6209	4.2873	1	63107-40-4	--	--	45393.0	1	-	-	19462.45	923.63	1339.34	18296.15	17517.6	19828.52	21159.96	12925.72	10818.58	766.49	4981.73	784.13	939.21	1747.02	339.86	358.53	147.17	467.24	2357.67	3783.3	1.1957608993835966	0.0028634101918235733	0.12927553372750825	-2.951478833736996	down
MW6794	CE 12:0	C39H68O2	635.4746	568.5219	0.6209	4.783	1	--	HMDB0002262	--	--	1	-	-	840.63	9549.79	24790.0	3246.37	553.77	1271.06	3272.27	16434.6	5843.33	4184.48	168790.7	140736.69	184492.48	222259.71	177219.7	266543.06	147431.59	191157.0	234440.17	254412.09	1.6961157202869719	1.3188068304643946e-07	28.39817492852173	4.827726309611065	up
MW9137	Sinapoylcholine	[C16H24NO5]+	352.1983	310.1649	0.6209	4.2366	1	--	--	C00933	--	1	-	-	2228.94	9439.9	19530.31	1461.29	5468.06	2810.94	1151.07	2013.59	3575.01	4268.51	2079.55	46088.11	34950.19	13363.55	55186.53	19842.84	22031.04	30023.26	21302.18	14845.42	1.1834112900768914	0.002436133013789581	4.999510468429544	2.3217868390185177	up
MW9308	TG(21:0/a-13:0/i-22:0)[rac]	C59H114O6	578.1083	593.1315	0.6209	4.2939	1	--	HMDB0064896	--	--	1	-	-	16344.43	20463.39	799.0	1213.06	1765.17	16260.37	19357.38	32361.95	56166.78	18449.37	312398.84	278446.26	203581.86	249861.29	106670.18	120270.1	134132.48	112422.91	43153.48	116136.48	1.3657113446930167	0.00040331591642069634	9.155287914842653	3.194605256506972	up
MW9347	TG(a-21:0/14:0/i-21:0)[rac]	C59H114O6	835.0297	406.0206	0.6209	4.7612	1	--	HMDB0066222	--	--	1	-	-	3581.86	4092.83	4526.66	7320.52	4728.81	4214.95	10243.57	155314.69	78023.14	2116.85	192296.38	57082.18	246017.49	84612.9	96370.88	113588.11	155537.29	96505.34	236886.75	81511.79	1.2556156864853258	0.0008365204190594354	4.9620289514432026	2.3109301528002115	up
MW7045	Cyanidin 3-O-(2-O-beta-D-glucuronosyl)-beta-D-glucoside	C27H29O17	692.0944	625.1405	0.6208	4.0129	1	--	--	C19762	--	1	-	-	28507.5	9110.84	12964.41	20599.75	24541.83	26244.33	28594.11	24416.7	15127.21	17454.79	1278.15	1004.09	466.93	240.0	1569.4	2339.22	1911.33	922.63	290.2	422.61	1.6037120692745384	6.744446287885082e-06	0.050320321974979265	-4.312715036432328	down
MW7639	GW 7647	C29H46N2O3S	502.3229	502.3229	0.6208	4.7121	1	265129-71-3	--	C15622	45134.0	1	-	-	72132.31	5582.13	15459.54	72823.76	45791.64	55376.87	73907.63	4816.99	2891.29	26844.14	7944.04	327.55	445.03	436.29	330.73	352.86	342.03	534.51	3818.97	349.87	1.188849707419844	0.004097293224552956	0.0396188445803715	-4.6576693828051345	down
MW7604	Gly Trp Ser	C16H20N4O5	366.1776	348.1434	0.6208	3.2878	1	--	--	--	18314.0	1	-	-	39375.74	6686.1	40814.36	40637.06	32169.42	40996.68	34945.56	25023.51	18537.91	9713.59	1264.89	3105.54	501.32	858.45	396.45	170.45	378.52	280.16	6142.87	458.3	1.4885891180263615	8.938724956026043e-05	0.046926110366312654	-4.413465307243449	down
MW9575	Tri-N-acetylchitotriose	C24H41N3O16	650.2386	627.2487	0.6208	4.9005	1	38864-21-0	HMDB0006698	--	58520.0	1	-	-	3739.94	4450.82	1500.18	1835.14	2552.24	617.89	2090.15	10591.88	3407.03	2844.98	116922.66	53795.02	123994.38	78389.45	56689.5	94768.47	50422.7	46276.55	49849.08	87091.64	1.561954229126174	2.2540158081250954e-05	22.545162465339985	4.4947460012742315	up
MW134	13-Apo-beta-carotenone	C18H26O	515.389	258.1984	0.6208	11.5861	1	--	--	C20696	--	1	-	-	30183.46	39025.58	100958.08	202602.56	162567.97	76621.01	89080.81	69508.15	49534.94	49797.75	8429.24	43810.07	2019.77	8818.21	10998.95	218.06	5397.51	960.44	4880.57	1917.66	1.2695329685747443	0.0015241867547376505	0.10053162371269216	-3.3142787009760077	down
MW5885	2,4-Bis(acetamido)-2,4,6-trideoxy-beta-L-altropyranose	C10H18N2O5	247.1293	246.1216	0.6207	1.8843	1	--	--	C19972	--	1	-	-	153792.58	52098.09	16243.45	142846.09	121626.53	141161.14	161545.22	25902.18	19923.12	111210.24	61637.27	57405.41	28497.48	47610.69	10407.5	32161.43	16716.05	22544.3	17064.99	21646.75	1.086855757255511	0.008578287410862511	0.3335893947076418	-1.5838546707507617	down
MW8419	Nap-His-OH	C24H20N4O6	575.0127	460.1383	0.6205	4.2951	1	--	--	--	65217.0	1	-	-	1023.75	6822.23	1089.81	440.69	2125.66	937.77	1102.19	4927.3	5501.68	5511.01	68942.39	70372.46	42387.78	55192.14	15921.67	23241.35	23124.4	25573.11	3946.61	22967.11	1.25624903914826	0.0015587009981913506	11.928225576951974	3.576307540960785	up
MW6504	Asn Phe Glu Tyr Ile	C33H44N6O10	667.3092	684.3119	0.6205	10.6587	1	--	--	--	264632.0	1	-	-	24276.15	34102.16	11458.92	21673.66	18817.26	19201.86	15099.52	23855.69	35252.12	24675.17	17755.5	75007.7	65579.53	48219.08	61451.77	83724.97	51103.15	71442.37	3179.27	58215.11	1.1627974971105115	0.003883266396114185	2.3452237795556816	1.229725590225469	up
MW1909	meso-2,6-Diaminoheptanedioate	C7H14N2O4	189.0877	190.0954	0.6204	0.8324	1	922-54-3	--	C00680	63450.0	1	-	-	8236.88	5249.84	4255.68	5174.23	6081.68	5387.52	5869.13	4791.86	4826.51	6313.85	20741.75	18248.36	7311.11	10103.82	15668.63	10712.11	16340.58	12315.67	4195.0	9249.17	1.2312914008234122	0.002213070206798268	2.2226814017005303	1.1523011678307462	up
MW6964	CL(i-14:0/i-14:0/i-17:0/a-17:0)[rac]	C71H138O17P2	706.1208	642.1043	0.6204	0.7462	1	--	HMDB0091415	--	--	1	-	-	10393.51	15017.05	4615.54	9153.69	5461.25	7702.03	9053.45	7171.84	10128.78	18554.71	14127.36	40405.09	24701.94	37492.35	38274.96	24037.86	39348.07	22367.11	23852.23	24737.64	1.4328402265421778	4.5609517988016476e-05	2.975209314784243	1.5729911698587191	up
MW6160	5-Valerolactone;delta-Valerolactone;gamma-Valerolactone	C5H8O2	101.0599	100.0524	0.6204	1.6435	1	542-28-9	--	C02240	--	1	-	-	82106.92	43051.07	107075.17	74648.53	73212.84	81458.08	70885.63	41345.41	43822.2	54334.69	76311.91	79051.6	233483.55	235148.65	106934.12	166386.72	109141.81	119560.79	360365.02	206231.74	1.1202541291978811	0.005868202190360271	2.5189965618088763	1.3328491529317537	up
MW1496	Glycyltyrosine	C11H14N2O4	219.0771	238.0954	0.6202	2.1564	1	--	HMDB0028853	--	--	1	-	-	9971.46	558.46	169.6	6558.58	10048.58	11404.05	11270.1	16668.57	17060.79	3002.68	4640.47	282.73	3727.08	200.65	718.92	188.48	177.32	618.81	3268.03	3352.35	1.101748207101336	0.005286139061934045	0.19806563892995352	-2.335949476371776	down
MW9144	SM-17466	C20H21N4O5S2	528.0481	461.0953	0.6201	1.1421	1	--	--	C12018	--	1	-	-	42744.25	134368.4	66029.36	125438.39	116502.95	121017.14	123696.35	82862.82	77528.14	181226.97	173207.58	354048.55	223293.38	366050.08	295372.6	306552.54	308945.25	287641.22	232173.86	107813.96	1.4027575417966534	9.211308907824496e-05	2.4781243402123345	1.309248576706646	up
MW8914	Propericiazine	C21H23N3OS	748.347	365.1562	0.6201	3.7758	1	--	HMDB0015546	D01485	--	1	-	-	156262.0	6498.69	278802.3	183250.55	185812.21	212747.19	161853.02	98734.27	35426.91	1137.23	5471.25	2115.66	5418.75	1693.21	4295.28	5177.5	2823.9	3963.26	4127.08	2013.43	1.2763120163137358	0.0018524047711863797	0.028094384960120043	-5.153574372483723	down
MW530	AGC	C15H25NO3S	298.1486	299.1555	0.6198	0.9455	1	--	--	--	43439.0	1	-	-	337537.65	498604.9	132277.58	337631.92	321751.96	338954.63	332228.31	394426.4	384038.93	476742.7	133265.32	231860.75	137775.69	153897.68	239410.36	88596.27	231914.24	109583.51	183954.48	103721.18	1.3844921935309382	9.869605365762087e-05	0.4541054976111637	-1.138900592086023	down
MW5868	2,2,2-Trichloro-1,1-bis(p-chlorophenyl)ethanol	C14H9Cl5O	482.7851	367.9096	0.6198	4.7347	1	115322	--	C14301	--	1	-	-	6895.66	23996.32	2219.91	1569.68	1864.53	6273.86	2809.85	1881.27	1605.18	25385.82	30466.21	83392.48	26433.44	25840.51	91620.84	47982.96	99042.04	42388.6	48160.04	30103.1	1.3275852418550336	0.0005647071476636388	7.052557727247348	2.818146569739968	up
MW2009	N-.gamma.-Acetyl-N-2-formyl-5-methoxykynurenamine	C13H16N2O4	245.0927	264.111	0.6198	3.6836	1	52450-38-1	HMDB04259	--	--	1	-	-	29406.79	20341.02	11170.23	24151.5	26604.21	22754.89	30910.73	20775.75	16163.85	34047.34	20631.77	12112.5	13617.74	10668.48	11903.35	8833.36	7885.7	6702.82	15468.55	6038.02	1.3232548825049475	0.00027318974048712893	0.4818011587452958	-1.0534902315847818	down
MW7029	Creatine	C4H9N3O2	114.0658	131.0695	0.6198	1.4669999999999999	1	57-00-1	HMDB0000064	C00300	7.0	1	-	-	117072.5	140608.43	116400.01	98677.04	105928.55	83974.53	103209.55	338834.28	377830.55	142470.11	667078.47	269802.33	368864.16	511853.01	262418.54	349209.01	238072.52	298243.71	590901.95	342152.54	1.2286336319123814	0.0011198931449523757	2.3991279537476045	1.2625101035731632	up
MW7177	DG(13D5/13M5/0:0)	C50H86O7	865.5898	798.6374	0.6198	4.51	1	--	HMDB0116410	--	--	1	-	-	3045.93	11464.69	36971.15	2059.59	4469.8	3787.03	6461.96	2907.44	3893.37	4561.61	38814.26	11322.83	39183.29	30040.81	36202.58	7120.03	23525.28	5078.45	47681.68	44118.38	1.0863984528407542	0.0037117099159731694	3.5553686599164034	1.829999162167463	up
MW6731	Candoxatril	C29H41NO7	557.3226	515.2883	0.6197	1.3598	1	--	HMDB0014754	D01070	--	1	-	-	220146.44	326086.61	594637.37	248027.41	237360.14	239498.79	222628.97	191467.95	165994.93	229967.78	87861.56	206881.9	10914.19	126070.93	163828.43	114450.66	161802.57	89516.45	43492.77	11242.19	1.1989236077446674	0.002069786133004986	0.3797202430619688	-1.3969911831396136	down
MW2407	PS(18:0/22:6(4Z,7Z,10Z,13Z,16Z,19Z))	C46H78NO10P	851.5548	835.5363	0.6197	12.2326	1	--	HMDB0010167	--	--	1	-	-	14174437.19	45974716.63	20095319.98	46610822.0	48269719.05	10842232.13	28905689.3	25361795.21	10388015.5	22080022.42	2804842.35	9886506.06	12396470.55	23881951.19	10582230.36	6789548.58	13103343.25	6607665.46	9318214.23	6928484.0	1.1063843670374711	0.005567348451282699	0.3751309759388483	-1.414533698354916	down
MW9666	Tyr Thr Val Thr Leu	C28H45N5O9	596.3296	595.3217	0.6195	4.6935	1	--	--	--	264343.0	1	-	-	1226.79	2280.97	20207.9	3015.65	6183.09	1828.15	2561.2	4229.49	5391.22	2999.65	143700.07	31104.03	95552.98	26938.85	104125.67	21996.17	110559.33	22546.45	138205.78	38049.93	1.278329013355583	0.0018713348242581497	14.677863260857329	3.8755700571192913	up
MW7577	Glu Tyr Arg	C20H30N6O7	581.092	466.2176	0.6195	4.8174	1	--	--	--	16022.0	1	-	-	2152.02	4960.05	969.42	3040.85	1776.02	1697.14	3794.16	35101.08	38234.65	1221.31	30350.98	46343.64	63400.94	71279.59	45812.37	40327.26	59288.47	55654.29	22571.27	46506.77	1.4472832325590308	1.3429469604922e-05	5.180771130120811	2.373166851348472	up
MW2511	Sanggenon E	C45H44O12	811.2588	776.2833	0.6194	1.2038	1	81381-69-3	--	C17871	--	1	-	-	32044.68	28665.23	15554.57	34436.67	35680.03	32879.07	31268.76	21560.51	28887.26	9611.69	36327.71	14058.03	23802.4	4699.01	7636.0	10934.92	9071.16	10584.9	8994.94	4647.49	1.0735748551180566	0.003465706388392066	0.4832303460675912	-1.0492170385138244	down
MW9506	Thr Leu Arg	C16H32N6O5	389.2511	388.2434	0.6192	3.6961	2-search-DB	--	--	--	22344.0	1	-	-	139297.48	2131.4	347362.92	124122.42	138560.24	156211.34	118713.79	96310.59	92179.79	179.65	1670.29	7335.57	12460.47	7866.06	10240.87	16934.83	10182.05	12563.36	7347.62	8596.02	1.1691239747689608	0.005063010694384987	0.07834706623641861	-3.6739769368434816	down
MW5827	2-nonenoylglycine	C11H19NO3	260.1489	213.1365	0.6192	1.7513	1	--	HMDB0094807	--	--	1	-	-	143113.07	60539.11	97084.96	239026.09	215908.31	123397.95	140619.93	111764.3	168454.62	74055.17	40840.11	19543.08	21864.55	31430.54	28379.98	19943.22	12290.55	35264.85	10018.56	26879.71	1.4360762902299622	0.00014235156103776194	0.17937532416708796	-2.478946655858186	down
MW9212	Talc	Mg3Si4O10(OH)2	794.5989999999999	377.8175	0.6191	11.2396	1	14807-96-6	--	C19292	--	1	-	-	1883434.18	1755651.5	2344289.4	2081628.49	4807380.15	3171334.63	2743710.57	8479587.23	1259890.47	2669388.74	864625.6	558762.86	876935.93	777952.79	290912.45	298425.61	332184.69	378602.84	791020.02	406373.95	1.1795462628521942	0.004042568135460091	0.17873265641500838	-2.4841248402300056	down
MW2023	N-Desmethylclozapine	C17H17ClN4	623.2204	312.1142	0.619	0.7932	1	6104-71-8	--	--	1900.0	1	-	-	8934.8	18637.11	2314.07	7634.12	6917.43	4458.94	4708.72	4161.23	4033.02	18012.41	17417.64	58963.08	8840.01	29620.22	31524.97	21063.24	31282.31	23107.28	12120.6	5436.07	1.0188280051675205	0.010193591152650536	2.9992466031046767	1.584600147898435	up
MW1602	Ile Gln Asn Glu	C20H34N6O9	501.2319	502.2387	0.619	4.1758	1	--	--	--	164902.0	1	-	-	11747.96	24225.02	18071.11	15078.43	15956.2	15767.89	15052.17	13343.47	5590.71	22387.39	3471.16	893.84	177.14	2720.87	682.1	577.34	793.46	916.36	4256.86	1571.6	1.5937635762643618	7.795974853761342e-06	0.10215426946956928	-3.291178593079012	down
MW9	(+)-AS 115	C21H32FNO4	400.2308	381.2315	0.619	2.8225	1	926657-43-4	--	--	45188.0	1	-	-	2622.34	357.9	6427.33	3300.74	97.44	111.08	101.02	581.07	5571.57	11369.35	26903.89	40369.54	8133.79	13033.13	30641.85	11770.56	39076.27	14969.76	14365.06	4398.72	1.220979436061401	0.00200604371084895	6.668750392929367	2.7374164509420837	up
MW117	10-DEACETYL-7-XYLOSYLTAXOL C	C49H63NO17	956.4076	937.4096	0.619	0.9334	1	90332-65-3	--	--	84944.0	1	-	-	1906.65	3957.93	3480.39	2586.62	3223.22	2114.1	2181.17	707.63	596.85	2616.6	16428.81	12085.09	10049.68	4008.68	12040.5	6346.34	11281.78	5334.03	3995.65	1918.36	1.2125140127539742	0.0026931689781666394	3.572305354120206	1.8368554046602636	up
MW5725	16-Dehydroprogesterone	C21H28O2	359.2221	312.2089	0.6188	6.1372	1	--	HMDB0000995	C03207	--	1	-	-	20108.67	770.93	9995.12	26042.16	18549.51	25819.93	26442.78	15260.03	13605.55	834.02	22065.24	2767.76	24839.34	10520.39	47699.46	64548.16	54450.14	58099.47	53062.75	42738.68	1.0706999561872643	0.010594583870944516	2.4188181062284078	1.2743022835349471	up
MW2463	RG-108	C19H14N2O4	667.1828	334.0954	0.6188	4.6768	1	48208-26-0	--	--	64811.0	1	-	-	35656.92	186.42	7995.36	36097.89	33765.81	40628.72	42969.0	6941.34	6093.1	653.73	107.27	2825.73	88.24	237.89	4041.18	73.6	3711.62	187.89	74.92	87.31	1.1249083569837397	0.006606105711136872	0.054200401358767365	-4.205552654871603	down
MW5649	1,2-Benzenediol bis(trimethylsilyl) ether	C12H22O2Si2	277.1047	254.1158	0.6187	4.0787	1	--	HMDB0094664	--	--	1	-	-	1184.44	747.32	159.39	1654.85	634.86	723.38	228.55	2118.77	1029.52	724.28	4449.78	2763.36	1348.95	2161.99	1306.0	1380.79	2533.04	2586.48	1626.13	1845.89	1.153341371353388	0.0027696299404221425	2.39017376832628	1.257115507574004	up
MW7204	Di-n-pentyl phthalate	C18H26O4	324.2174	306.1831	0.6186	10.7791	1	131180	--	C14300	--	1	-	-	29134.09	13894.72	26165.04	29267.04	38834.78	32086.62	21778.46	27542.05	21073.58	15370.14	73385.59	75125.72	47842.96	86363.73	74276.24	59357.31	60055.21	62277.01	85973.91	49918.48	1.590303783740025	6.551387552579194e-07	2.643877564937981	1.4026553687719807	up
MW9139	Sinigrin	C10H17NO9S2	757.0314	359.0345	0.6186	1.1213	1	--	HMDB0034070	--	--	1	-	-	35506.58	43325.31	19862.16	34548.32	34595.68	33992.96	31782.47	24966.41	22569.86	38929.16	19481.97	88597.98	66428.53	97712.34	40704.07	88062.17	77455.8	95752.62	61001.03	91582.55	1.3075916545101616	0.0006717453978575453	2.2706246406550186	1.1830892323224498	up
MW9116	Ser Ile Arg Arg	C21H42N10O6	513.3251	530.3289	0.6184	4.6014	1	--	--	--	226573.0	1	-	-	8799.0	1451.59	35883.06	10243.72	12881.67	798.2	12161.55	899.72	694.58	28143.33	60649.99	113212.68	19183.96	152817.71	105195.3	65833.53	96525.92	60925.27	21492.58	34951.83	1.2496671110851394	0.0013254779047206775	6.527439605517932	2.7065172042083034	up
MW5600	1-Myristoyl-2-hydroxy-sn-glycero-3-phosphoethanolamine	C19H40NO7P	472.2675	425.2542	0.6184	4.7804	1	123060402	HMDB0011500	--	--	1	-	-	2145.89	13355.82	26971.25	7318.0	3443.3	3738.19	4312.24	51355.13	25054.13	5936.51	198099.51	51382.2	272529.91	159602.04	98892.94	82970.91	45714.32	57312.03	300813.47	143567.67	1.2640575467197903	0.0017271533280103454	9.823020827197798	3.2961667579647136	up
MW6660	Bispyribac	C19H18N4O8	878.2579	430.1125	0.6182	0.7705	1	125401-75-4	--	C10915	68684.0	1	-	-	18923.15	61939.81	7305.75	20643.99	20173.67	17946.81	19467.65	6651.08	13088.17	71297.36	97406.32	133117.7	59996.24	98823.1	107294.4	37102.39	104560.41	41363.36	77983.96	57921.71	1.2707416476335909	0.00031419616391469414	3.1680302212452083	1.6635860979909542	up
MW1606	Ile Glu Lys	C17H32N4O6	369.2139	388.2322	0.618	4.1682	1	--	--	--	18816.0	1	-	-	130437.94	31873.02	96805.53	145413.6	122713.87	129640.84	137256.45	257859.93	217907.54	55810.17	828.81	1163.06	326.02	1038.3	20141.75	166.95	18941.77	170.8	33953.2	33785.34	1.393045682131273	0.000244913245861252	0.08336307254398402	-3.5844477372269448	down
MW8103	Lys His Phe Arg	C27H42N10O5	587.3419	586.3340000000001	0.618	4.8733	1	--	--	--	169973.0	1	-	-	21161.26	1113.58	13783.08	20839.51	19052.59	20083.93	23816.89	19322.0	27496.81	11069.71	6967.64	2093.42	4985.63	1013.85	2459.38	816.98	2697.84	3525.21	6310.96	6324.17	1.41175598728347	0.0001544244397968869	0.20926754771706169	-2.256579492695053	down
MW1910	Met-Arg-Phe-Ala acetate salt	C23H37N7O5S	560.2068	523.2577	0.6176	0.7967	1	67368-29-0	--	--	44690.0	1	-	-	189898.85	378508.98	117731.41	196476.31	201679.55	192441.9	192940.41	189611.18	195907.33	406898.44	514335.2	715038.53	412899.51	560861.73	505707.09	339182.61	548783.16	312337.58	397581.3	341086.81	1.3073964514008858	0.0001736545770115131	2.054650593797511	1.0388930754375183	up
MW8543	OTK	C19H33F3O	686.5313	334.2484	0.6176	4.005	1	177987-23-4	--	--	64851.0	1	-	-	27497.4	15674.33	96651.88	33812.08	30786.14	30983.85	34684.59	27270.05	22149.17	16786.35	1029.79	252.73	2061.03	822.65	3275.05	418.42	165.35	690.59	4494.86	604.13	1.2944750053827356	0.001675193780615063	0.04107871212441997	-4.605465237934535	down
MW3004	Tyr Thr Gln	C18H26N4O7	409.1724	410.1802	0.6174	4.2908	1	--	--	--	16374.0	1	-	-	18830.54	17223.42	17192.96	18297.35	16885.65	19681.22	18976.69	4039.65	2885.96	30071.76	126.94	278.78	194.78	202.89	302.8	2446.29	185.52	3374.45	136.13	3601.26	1.4820877465361328	0.00013785618132450768	0.06612320916206946	-3.918699445031809	down
MW546	Ala Glu Val Asp	C17H28N4O9	451.1841	432.1856	0.6173	4.3528	1	--	--	--	105022.0	1	-	-	69595.61	26156.01	29018.68	77086.46	82371.55	86592.22	83886.78	25383.24	20315.07	63599.46	229.11	216.64	19337.58	12904.91	11253.84	16061.83	384.68	16424.45	22376.52	410.39	1.3606781855826597	0.0003958909030426701	0.17659406542933975	-2.501491233891482	down
MW8406	N6-Methyl-2'-deoxyadenosine	C11H15N5O3	265.1166	265.1175	0.6173	4.806	1	--	--	C03795	--	1	-	-	93618.04	53175.71	43152.07	73168.65	83825.65	79273.52	139357.67	8493.71	12332.96	79078.81	28778.19	24938.63	26277.12	826.18	30541.67	22156.29	28187.55	24433.92	28115.64	29810.3	1.1166298312786842	0.0077297728521355845	0.366752820936099	-1.4471200322337712	down
MW382	4-Methylphenyl acetone	C10H13O	186.0448	149.0966	0.6171	1.1116	1	--	--	--	265046.0	1	-	-	3283.11	24992.13	1878.16	31029.48	4560.42	4445.45	994.35	13662.95	27253.15	1712.04	49745.87	52811.96	19531.09	21863.58	41426.64	25018.91	62525.67	28280.4	38394.79	18191.17	1.2306943023301395	0.00108047294138918	3.143714803564217	1.652470342868031	up
MW5734	17-[(Benzylamino)methyl]estra-1,3,5(10)-triene-3,17beta-diol	C26H33NO2	506.1256	391.2511	0.6169	4.664	1	--	--	C15163	--	1	-	-	1427.33	31595.09	1636.76	13540.66	11676.36	2858.96	2757.25	3947.14	4843.36	30530.7	169641.81	107557.87	136495.31	84974.11	74360.11	34114.57	88263.27	25243.07	311006.13	170047.06	1.2238053932818362	0.002392316625592209	11.465145700067005	3.5191827838164036	up
MW6999	Clorobiocin;Chlorobiocin	C35H37ClN2O11	763.1611	696.2086	0.6168	1.454	1	39868-96-7	--	C12032	--	1	-	-	10767.12	15859.1	4261.38	11684.37	10972.87	5428.59	6394.83	5675.29	6923.14	14118.37	5618.46	28029.97	18776.93	22715.74	29745.97	16901.35	18611.29	19235.47	24391.22	20368.8	1.2810514138727571	0.0004054459977591751	2.21963475942786	1.150322300848818	up
MW9086	Sativanine B	C30H38N4O4	519.2961	518.2893	0.6167	3.71	1	72361-60-5	--	C10013	--	1	-	-	65652.22	641.91	160554.32	63658.1	63148.98	57884.5	59352.34	48513.92	40863.5	40675.43	833.49	740.43	555.78	1214.96	2083.03	2648.36	1545.52	1299.1	613.02	1131.44	1.322932828376719	0.0012462758005849749	0.02107534859832981	-5.5682996954082045	down
MW6161	5 -Androst-16-en-3 -ol	C19H30O	341.1825	274.2297	0.6167	4.5431	1	1153-51-1	--	--	41837.0	1	-	-	9036.33	729.81	506.47	8593.72	7704.09	10985.81	10248.24	1383.08	985.7	387.54	1585.84	213.77	264.1	247.0	403.94	492.93	779.72	410.66	583.32	235.98	1.0441901078865392	0.01211508407242285	0.10318786553770223	-3.276654769066855	down
MW8846	Portulacaxanthin III	C11H12N2O6	554.1723	268.0695	0.6166	0.7787	1	135545-99-2	--	C08566	--	1	-	-	225563.38	903822.81	295164.32	267974.65	259633.08	260738.47	258289.13	254070.54	266250.42	485839.38	2196256.29	3553904.38	1331944.48	2687810.82	2883251.58	1430301.54	2859212.24	1451344.86	1344168.83	1483253.57	1.4774629373589552	5.471125368125009e-05	6.102771335237034	2.6094645350778825	up
MW7328	dTDP-3-amino-2,3,6-trideoxy-C-methyl-D-erythro-hexopyranos-4-ulose	C17H27N3O13P2	1087.2122	543.1019	0.6165	5.1934	1	--	--	C12319	--	1	-	-	125700.9	136990.74	81784.22	119538.28	123161.55	107280.17	109783.42	105081.48	117993.19	109314.42	624828.57	697319.58	232206.61	332318.33	348388.5	176235.99	275917.61	202854.87	1375118.58	681306.42	1.0688684769581562	0.00962767371375803	4.351901809383836	2.1216460058729267	up
MW9546	Torcetrapib	C26H25F9N2O4	639.1309	600.1671	0.6165	0.7459	1	262352170	--	D06195	--	1	-	-	7938.67	21055.56	6762.45	12624.87	11518.78	8274.03	8462.79	6905.91	4441.4	25690.49	32114.5	73805.49	31784.23	72808.73	71499.0	41586.98	71064.08	40684.28	34621.92	40680.36	1.4560378763520034	4.7632175005852394e-05	4.492190847675762	2.1674192209590384	up
MW2187	PE-NMe(15:0/18:2(9Z,12Z))	C39H74NO8P	752.4646	715.5152	0.6165	4.6259	1	--	HMDB0113020	--	--	1	-	-	3500.24	83.1	5505.0	125.22	3502.42	4712.77	4437.91	6691.41	5356.88	4827.63	6660.63	81.61	286.1	251.35	152.41	157.96	136.88	62.96	263.66	2227.06	1.0264045033040925	0.008164787292438809	0.2653571341918891	-1.913992758405028	down
MW5987	3-Oxo-5,6-dehydrosuberyl-CoA;3-Oxo-5,6-didehydrosuberoyl-CoA	C29H44N7O20P3S	1012.0777	935.1575	0.6165	4.3772	1	--	--	C19945	--	1	-	-	2449.01	5875.11	2203.64	926.72	1137.82	615.03	1642.44	9430.46	5106.48	1677.69	6110.58	20809.58	11106.33	22916.78	7242.1	39600.27	3477.64	41069.65	13339.14	11137.59	1.1199314105542468	0.007357084950329542	5.691713343892044	2.508863004141386	up
MW9430	TG(i-21:0/i-15:0/i-22:0)	C61H118O6	589.0606	544.0887	0.6164	4.1139	1	--	HMDB0066074	--	--	1	-	-	427.85	9300.32	16037.47	22311.44	20418.8	435.3	17101.15	59735.5	73248.47	2533.84	61691.52	192542.55	68714.96	210458.25	79392.67	80588.46	94011.53	86767.58	83529.41	38286.3	1.2045497898092667	0.0016766712762397947	4.495520652796699	2.168488212449173	up
MW2534	Ser Gln Tyr Lys	C23H36N6O8	561.2087	524.2595	0.6164	0.8026	1	--	--	--	229067.0	1	-	-	47886.16	94449.56	30760.71	49349.69	43886.75	46706.69	55525.72	47551.22	56245.29	102077.39	125383.1	181115.19	107905.28	136584.96	161886.51	81211.6	125659.75	84778.33	86919.97	87610.16	1.2794953444299204	0.00030974447795174945	2.0525320887756995	1.0374047769145007	up
MW1988	Mucronine B	C28H36N4O4	508.2925	492.2737	0.6164	4.6434	1	38840-26-5	--	C10010	--	1	-	-	31742.05	5591.55	7685.81	34688.82	31380.1	34799.28	35596.56	32917.08	29219.07	2025.19	9189.41	383.06	3198.18	2037.71	9895.04	4928.85	5692.2	2232.01	6796.76	1465.1	1.26060205628733	0.001117107494264476	0.1865221147335443	-2.422581403146982	down
MW2417	Pyochelin	C14H16N2O3S2	345.0353	324.0602	0.6163	2.9494	1	69772-54-9	--	C12037	--	1	-	-	76939.54	10916.2	23473.13	80276.69	65562.93	76547.04	72541.97	19831.76	29598.61	35305.24	1658.87	329.03	997.14	25341.3	5393.65	7946.2	1790.2	3878.64	6622.52	604.67	1.329439125480301	0.0006394238250433974	0.1111262437063526	-3.1697285293401096	down
MW2739	TG(22:0/i-22:0/i-20:0)	C67H130O6	457.1663	438.1679	0.6162	0.8632	1	--	HMDB0069162	--	--	1	-	-	12335.52	5561.54	976.56	7664.63	10581.09	11606.68	11388.41	11044.14	14061.8	5835.45	11508.21	23964.41	16172.91	13111.74	16746.42	32302.96	21972.67	33576.87	4237.92	13980.23	1.0581014804253368	0.010247624892287355	2.0599928703074664	1.042639344209532	up
MW6988	Clarithromycin	C38H69NO13	786.4409	747.4769	0.6162	4.8017	1	--	HMDB0015342	C06912	--	1	-	-	7407.86	15535.28	29425.07	2071.58	7623.58	7918.66	4633.03	39938.83	25089.05	2674.33	142838.39	29141.86	357674.94	220769.15	23721.53	32511.66	46190.38	17675.04	377328.55	276450.55	1.0101509782500755	0.01450195414517404	10.710590850990886	3.4209661636106534	up
MW8911	Propaquizafop	C22H22ClN3O5	482.0885	443.1248	0.6161	0.7543	1	111479-05-1	--	C18886	--	1	-	-	1417.32	1953.98	407.47	592.3	488.85	329.83	527.95	2405.14	404.21	565.0	4893.05	21417.06	7163.69	6497.36	14174.83	22137.34	34802.77	15788.21	2860.58	7515.29	1.2333114020013431	0.002940332277485483	15.095625299024976	3.9160586130584223	up
MW6203	7-Dehydrologanin tetraacetate	C25H32O14	574.2137	556.1792	0.6161	4.2933	1	--	--	C11668	--	1	-	-	194416.12	81713.43	292160.6	200604.16	202226.61	205924.42	221291.06	211674.32	191359.32	89498.26	1036354.46	968748.03	747809.53	870338.67	381887.08	452981.15	347741.89	425497.06	179304.38	348384.44	1.1899026378328177	0.0027660297086726077	3.0457153943508386	1.6067811360661135	up
MW8035	Leu Tyr	C15H22N2O4	295.1659	294.158	0.6159	4.3358	2-search-DB	19659-00-8	--	--	24011.0	1	-	-	136455.53	116055.86	92112.83	139861.37	127164.25	144518.42	150819.07	127127.72	125436.98	92239.46	398663.26	59860.4	150918.72	215730.45	285572.47	340580.16	281600.09	307058.03	321940.77	276471.27	1.3151201337861311	0.0014824157296286671	2.1076957632936137	1.0756666352558732	up
MW5848	2-Oxosuberate;2-Oxooctanedionic acid;alpha-Ketosuberate	C8H12O5	189.0745	188.0685	0.6158	4.1295	1	--	--	C16589	--	1	-	-	358977.56	391338.61	294680.41	309577.47	274325.7	330303.4	371732.17	341533.87	299393.3	451945.76	365132.11	179261.8	185209.07	155068.53	117026.05	156091.48	119032.8	145647.66	168374.59	118660.5	1.4576846129139969	1.5572491471957447e-05	0.4992991619784782	-1.0020236096303488	down
MW9246	TETRACYCLINE HYDROCHLORIDE	C22H25ClN2O8	519.0926	480.1299	0.6158	4.7780000000000005	1	--	--	D02122	--	1	-	-	47478.4	49209.05	1740.71	18673.79	34402.22	48284.21	57393.55	374468.44	243767.56	35853.43	1103735.88	330863.83	1522533.97	611132.69	535385.43	637929.11	539315.12	486605.88	1486885.09	668260.11	1.36905967246677	0.00045386946808311033	8.694059154893225	3.1200299118318666	up
MW7152	Delphinidin 3,3',5'-tri-O-glucoside	C33H41O22	831.2436	789.2089	0.6158	5.6567	1	132548-17-5	--	C08640	--	1	-	-	23884.64	12540.05	4252.01	13590.47	22509.88	20874.94	14463.33	34079.45	40636.61	12052.15	936.94	953.91	3973.67	1310.71	623.48	598.47	1094.86	1165.31	4839.32	260.57	1.3435309221956413	0.0004821430057798741	0.07922848111153298	-3.6578370451765263	down
MW7006	Cochlearine	C15H19NO3	338.056	261.1365	0.6157	3.9367	1	52418-07-2	--	C10853	--	1	-	-	19159.74	54.05	6040.42	20260.58	18607.86	17965.48	21865.35	631.67	1155.5	63.38	49.87	1803.4	1160.58	1474.1	120.76	37.22	1407.54	1425.11	2045.42	77.0	1.0532993400106128	0.011889214913538391	0.09074323539471983	-3.462066090757162	down
MW652	Aripiprazole	C23H27Cl2N3O2	428.1306	447.148	0.6155	3.6834	1	--	HMDB0005042	C12564	--	1	-	-	48736.8	45874.03	13554.35	51299.23	48750.54	47522.77	47201.27	46147.62	38374.07	67903.04	38789.07	28095.76	24837.89	21709.76	19194.21	9952.28	19421.3	11163.11	24545.83	12078.11	1.3374979070640545	0.0002045332731159626	0.4607027542730018	-1.1180918718874502	down
MW9579	Triamifos	C12H19N6OP	336.1692	294.1358	0.6155	4.062	1	1031476	--	C18927	--	1	-	-	102308.38	185954.57	1061.81	85029.13	82596.68	82844.74	72756.66	51796.99	77263.82	94099.4	29625.61	2271.73	2586.69	8188.08	1565.07	10499.87	10283.17	10756.19	1966.69	12633.2	1.3430749921042728	0.00056041937829039	0.10814285367960057	-3.2089897629360227	down
MW7751	Ile-Phe4Cl-OH	C20H21ClN2O6	420.1088	420.1088	0.6154	3.7117	1	--	--	--	64968.0	1	-	-	9752.12	323.08	28455.18	9238.48	12331.48	12587.46	5393.65	5384.86	10162.05	6836.44	579.58	588.83	1166.0	523.84	746.67	1938.96	249.66	1179.85	2337.18	964.18	1.1957822774642428	0.004015966819003189	0.10227213909747493	-3.2895149142257027	down
MW9365	TG(a-21:0/i-17:0/i-14:0)[rac]	C55H106O6	645.1102	322.0511	0.6154	4.834	1	--	HMDB0066070	--	--	1	-	-	2079.0	8421.39	9176.3	1518.81	1425.68	864.85	1157.91	8014.69	7478.14	1212.91	70635.69	41171.85	121091.77	73975.65	67027.91	78344.19	76208.43	70897.66	80016.67	108734.98	1.6451786385174012	1.5223146960010837e-06	19.059513882574183	4.252439418324982	up
MW1357	Forasartan	C23H28N8	397.2262	416.2437	0.6153	13.2229	1	--	HMDB0015434	D04243	--	1	-	-	46051.25	43508.54	56246.45	42558.69	56534.85	55408.4	62688.38	91455.49	190486.11	118963.28	12453.0	27971.84	10377.25	20343.82	26777.96	29287.27	17444.61	16707.21	29743.8	24638.99	1.1502041267459748	0.004780427353166854	0.2824261595841474	-1.8240543711705184	down
MW8245	METOLACHLOR	C15H22ClNO2	325.1681	283.1339	0.6153	2.5501	1	51218-45-2	--	C10953	44587.0	1	-	-	29234.65	26951.52	19781.17	28795.52	25997.36	28757.5	26736.86	10339.15	11040.02	18637.41	1130.47	394.53	151.95	153.78	254.15	470.39	61.69	210.75	5611.33	170.25	1.6122364831332403	3.3766197471849193e-06	0.038048552011666	-4.716014638682912	down
MW8941	PS(14:0/18:3(6Z,9Z,12Z))	C38H68NO10P	774.4285	729.4581	0.6153	4.9022	1	--	HMDB0112294	--	--	1	-	-	9294.84	8647.82	17491.07	5131.25	13200.75	7961.9	4719.49	18735.96	13640.69	1633.46	59944.78	13540.02	81180.93	31584.19	51478.78	46179.54	63869.44	46107.45	75251.9	45630.22	1.4963736695235883	7.378916821348575e-05	5.124242924078238	2.357338870889479	up
MW9547	Toyocamycin	C12H13N5O4	621.156	291.0968	0.6153	0.7511	1	606-58-6	--	--	96312.0	1	-	-	243337.76	496440.21	99166.21	258728.4	248312.4	251437.1	246790.34	248991.36	254307.6	399698.97	832583.88	619981.13	564150.85	629139.6	576099.47	379424.85	561314.17	375098.72	618906.04	502801.59	1.3923373129089505	4.0903585289227475e-05	2.0600899017434178	1.0427072975877665	up
MW6328	Ala Asp Ser Glu	C15H24N4O10	841.3049	420.1492	0.6153	4.7842	1	--	--	--	104583.0	1	-	-	983.19	11024.1	64093.5	3093.82	1543.89	2143.71	2657.22	40411.59	4635.59	2540.47	373995.95	123290.32	368433.81	276202.23	150124.86	189268.4	140481.0	168344.89	511714.81	257459.19	1.4436686133074703	0.00017821816568877111	19.22460449068664	4.26488201270024	up
MW9786	Zwittergent 3-14	C19H41NO3S	727.5679	363.2807	0.6152	3.9575	1	14933-09-6	--	C11216	--	1	-	-	53804.18	7794.78	257603.05	47699.28	43381.26	53091.49	57458.82	51130.7	56609.62	13675.44	589.8	1915.46	1100.22	562.06	484.26	479.2	613.23	411.36	266.41	135.02	1.010334534935327	0.01866915020371062	0.01020947308536062	-6.613947779656304	down
MW7032	Croconazole	C18H15ClN2O	310.0864	310.0873	0.6152	4.3457	1	77175-51-0	--	C11096	--	1	-	-	61468.02	21623.84	19354.47	64114.84	69786.59	60257.05	49901.75	2356.78	2506.19	146.45	11642.34	5050.21	6288.69	278.13	3682.23	301.24	85.46	4309.45	93.46	7972.23	1.1054072901659318	0.007322119358882955	0.11294917516978888	-3.1462543596393235	down
MW435	6-(alpha-D-Glucosaminyl)-1D-myo-inositol	C12H23NO10	340.1245	341.1322	0.6152	0.9296	1	--	HMDB0011668	C15658	--	1	-	-	65995.03	41911.1	32452.4	65951.04	69284.24	65311.96	67060.2	104920.27	85749.69	55264.3	96000.51	74893.09	171386.46	135063.0	146445.17	198101.59	140718.97	179909.67	140523.62	121348.44	1.4495121359937748	6.912257648262678e-05	2.1477137574947784	1.102801726954243	up
MW6938	CL(i-14:0/a-13:0/i-18:0/i-22:0)[rac]	C76H148O17P2	362.1187	362.1188	0.6151	2.4748	1	--	HMDB0091012	--	--	1	-	-	46226.79	43608.07	91510.23	38148.96	48837.34	47678.06	38899.15	22805.41	20819.69	24118.28	775.08	1341.97	3432.07	727.13	1865.54	887.79	1007.06	1322.53	142.08	1153.8	1.488863645385417	0.00012633081372830744	0.02994201044556801	-5.061685095884287	down
MW9105	Ser Asn Ser	C10H18N4O7	635.2237	306.1176	0.615	4.7858	1	--	--	--	15777.0	1	-	-	1272.76	6532.64	46866.53	10606.79	8483.21	2457.38	667.34	9288.46	8803.71	23366.09	130237.69	77861.37	158978.38	177708.23	167323.73	229361.23	146341.65	205060.95	221123.84	245355.83	1.6326844428364058	1.4961268652592343e-06	14.866316599505632	3.8939753326007938	up
MW727	Azomycin;2-Nitroimidazole	C3H3N3O2	94.005	113.0225	0.6149	12.8237	1	527-73-1	--	C14531	--	1	-	-	201960.92	146353.09	145296.7	81387.95	147361.8	141821.62	130433.01	122403.94	145834.48	132347.11	617987.74	344373.18	317063.8	614590.24	308668.54	310183.48	325743.97	334339.56	329180.63	301515.78	1.4409806394074618	0.00014493557651637797	2.7262365465405254	1.4469107454576235	up
MW2691	TG(20:0/i-17:0/14:0)	C54H104O6	385.1461	366.1467	0.6148	0.8465	1	--	HMDB0064132	--	--	1	-	-	16058.82	43811.19	15680.35	10014.27	32075.04	16626.33	15961.66	13869.59	19409.84	21377.08	49124.32	145945.4	42033.13	66532.94	131201.74	59204.62	101350.78	67222.15	40207.61	32303.62	1.2264203623119223	0.0020249247784500527	3.5880093127741386	1.8431836348156	up
MW1699	Kelevan	C17H12Cl10O4	650.7361	629.7621	0.6148	3.8681	1	4234791	--	C18962	--	1	-	-	14657.06	197.11	1268.51	13661.49	13443.12	14702.87	15537.42	6241.09	5169.87	6723.21	3946.79	171.17	2697.5	735.44	2126.48	253.38	2033.17	305.2	2618.29	227.73	1.2090694015775518	0.002562514106274831	0.16500940211295093	-2.599379864384292	down
MW7843	Isomontanolide	C22H30O7	830.4314	406.1992	0.6147	4.9756	1	38114-47-5	--	C09486	--	1	-	-	15231.34	29128.82	11059.87	19430.3	21409.1	28801.65	33755.18	8459.86	16855.12	11753.08	54082.91	65357.14	42409.48	40744.16	55821.08	40346.78	55511.28	61896.51	35997.78	33826.67	1.4822133860442943	5.7620930748988175e-06	2.4810244638264054	1.3109359608115734	up
MW2713	TG(21:0/i-12:0/16:0)	C52H100O6	823.1569999999999	804.1572	0.6147	1.2072	1	--	HMDB0065039	--	--	1	-	-	31842.43	19389.67	7078.24	30234.74	48770.95	38171.44	39208.35	49753.09	48852.01	4367.37	9976.51	991.76	16957.1	6724.77	1223.99	6395.22	485.02	1885.23	5710.65	6733.62	1.2876572127600907	0.0006936157864677095	0.17969646891730995	-2.4763660350964773	down
MW607	Angiotensin I/II (107)	C41H62N12O11	897.4578	898.4661	0.6147	13.1816	1	51833-78-4	HMDB01035	C15850	--	1	-	-	333989.21	231909.64	116414.79	278887.75	236904.77	118910.77	510313.56	620075.17	513015.6	418294.22	159175.92	124580.65	159732.82	106377.4	186621.03	194268.75	99581.49	109370.39	111695.27	190377.99	1.1121953116583738	0.006202203931190525	0.4267248066712027	-1.2286221141321094	down
MW6505	Asn Pro His	C15H22N6O5	771.2927	366.1652	0.6146	4.9155	1	--	--	--	15947.0	1	-	-	762.18	781.2	7169.76	2900.73	607.79	2016.21	1366.52	20716.14	1410.15	1061.85	195778.22	2365.5	111211.39	141055.37	89664.24	141828.89	99936.25	125530.79	234503.6	148615.32	1.4912060882487914	0.00012758625650981215	33.26644511198418	5.055995801404912	up
MW9779	ZAPRINAST	C13H13N5O2	236.0935	271.1069	0.6145	4.4684	1	37762-06-4	--	--	44292.0	1	-	-	6744.35	17303.63	12578.14	5430.96	3191.65	7414.16	6195.03	4552.53	3398.56	10237.29	39958.35	20444.32	15099.25	23774.63	22982.07	30299.18	29391.88	25064.33	6968.67	14765.58	1.3201644101488903	0.0004643157719762629	2.968971384738787	1.5699631885437024	up
MW2153	PA(18:3(6Z,9Z,12Z)/22:6(4Z,7Z,10Z,13Z,16Z,19Z))	C43H67O8P	763.4329	742.4574	0.6145	5.4745	1	--	HMDB0114997	--	--	1	-	-	369.36	1781.14	130.41	934.22	1124.92	1272.83	1177.77	281.26	282.24	1824.53	510.82	3082.67	533.42	861.86	5995.19	9220.62	7926.67	6118.15	3083.75	4674.58	1.1088997800000735	0.008665621919650823	4.576663528960591	2.194296230557	up
MW7827	Ipratropium bromide	C20H30NO3	703.4065	332.222	0.6145	4.4351	1	--	HMDB0014476	C07052	--	1	-	-	954.66	48925.49	3622.63	832.53	8079.41	1035.86	900.44	19060.26	52476.78	2294.45	167635.83	573332.53	49387.42	188414.08	197869.22	104247.9	218689.42	97183.94	62212.92	9761.93	1.0056209387313255	0.01398324791618302	12.076312624513767	3.594108104979869	up
MW9166	Spinosyn B	C40H63NO10	756.4075	717.4452	0.6144	4.8492	1	--	--	C11055	--	1	-	-	4057.27	3377.09	4437.17	1038.04	885.75	3685.96	2541.3	5790.57	7112.99	635.5	55041.48	36827.29	92945.47	56255.93	67713.48	69209.05	86488.09	74642.17	87743.01	83101.99	1.6812598598468045	5.904465512999152e-07	21.15414979720896	4.402868798638881	up
MW9339	TG(22:0/i-19:0/i-22:0)	C66H128O6	597.1255	490.1839	0.6143	4.2578	1	--	HMDB0068568	--	--	1	-	-	2849.0	6356.18	49123.63	2726.62	2931.74	20262.78	4171.88	2935.19	50620.39	60893.32	398107.93	181800.14	588159.56	19781.29	220108.57	68081.27	237797.94	39213.62	318923.36	164607.69	1.1487151442357637	0.00517912903832561	11.024662700232804	3.4626626120628625	up
MW7566	Glu Gln Arg Arg	C22H41N11O8	588.3219	587.314	0.6142	4.7508	1	--	--	--	132974.0	1	-	-	17740.02	16466.56	64663.72	11088.37	12017.13	6498.28	10639.54	45876.31	14644.92	8932.74	71812.27	34908.94	100823.26	51926.56	50756.59	70709.18	69055.1	68792.05	190289.08	63021.2	1.1911320840091255	0.00255789152126294	3.701889780670141	1.8882619413328028	up
MW568	Alizarin cyanin green;C.I. Acid green 25	C28H20N2O8S2.2Na	621.039	622.0456	0.6141	1.3451	1	4403-90-1	--	C20337	--	1	-	-	35732.79	12032.29	8424.56	38025.02	36666.57	29559.96	37292.81	54092.73	68661.95	3472.77	4091.28	1047.71	17548.51	1760.61	278.33	4198.36	1187.91	6604.44	14100.72	16530.85	1.1496829432625306	0.002983837393807988	0.20789115495068933	-2.2660997170673904	down
MW6174	6'''-Deamino-6'''-hydroxyneomycin C;6'''-Hydroxyneomycin C;Neomycin Y2	C23H45N5O14	692.2146	615.2963	0.614	5.0476	1	--	--	C17588	--	1	-	-	19306.63	7380.11	3863.31	19925.21	25456.93	19486.37	21706.22	7377.73	8168.05	12952.39	1471.62	2298.64	920.59	888.28	2918.35	499.88	610.3	784.02	1373.27	3099.75	1.4019312093653369	0.0003542566499990917	0.10207663009161674	-3.292275488320489	down
MW1004	CL(i-14:0/i-16:0/i-12:0/i-17:0)	C68H132O17P2	751.1524	376.0794	0.614	2.3379	1	--	HMDB0092247	--	--	1	-	-	1606.46	2036.02	82.66	861.74	510.7	941.43	1165.86	1404.63	1610.84	1004.12	5530.25	2000.24	3331.49	4478.38	10883.88	2492.92	12623.9	1418.33	6371.32	3687.1	1.142931919768876	0.006675322297265197	4.705599200317877	2.234378444162179	up
MW1982	Mosapride citrate hydrate;AS 4370	C21H25ClFN3O3.C6H8O7.2H2O	630.1878	649.205	0.6139	1.3534	1	636582-62-2	--	C13494	--	1	-	-	72885.1	49234.27	40189.16	77779.62	79338.04	77729.7	74565.21	55726.69	67892.63	55485.32	12616.43	22883.67	13945.81	37201.88	27136.64	24432.27	27449.39	28228.07	22558.5	15641.66	1.5696079006335308	8.376413055096793e-07	0.3566151516994396	-1.4875600940633709	down
MW8686	PE(20:4(5Z,8Z,11Z,14Z)/14:1(9Z))	C39H68NO8P	809.6616	764.6894	0.6139	4.3602	1	--	HMDB0009383	--	--	1	-	-	1190.53	19410.3	1084.17	3938.06	574.8	737.94	3248.15	6103.32	8804.76	8628.58	29186.15	35076.77	61713.25	68384.52	24739.83	26237.27	19204.0	26656.2	3616.66	19680.94	1.2058848594507916	0.0021305597284179602	5.8542818110218775	2.54949219528168	up
MW9041	Robenacoxib	C16H13F4NO2	374.1005	327.0882	0.6139	12.6025	1	220991-32-2	--	C20708	--	1	-	-	2806.33	1931.71	1781.73	2588.52	6092.85	3147.89	2499.48	1924.8	1747.38	767.1	4941.37	4692.23	6056.7	4967.19	8922.01	11876.26	10949.84	10456.87	2804.13	2935.85	1.21419573961012	0.0028758451213684853	2.7128685424863144	1.4398191406171916	up
MW7415	Evoxanthidine	C15H11NO4	577.1015	269.0688	0.6138	4.7779	1	668-35-9	--	C10668	--	1	-	-	13527.88	10533.96	67513.63	26617.35	17945.28	10325.42	8898.23	231570.83	149072.26	7569.72	609327.62	204904.3	798280.23	424328.33	277025.43	320294.64	315794.79	347596.7	828269.58	341736.0	1.3994651369673718	0.00023575090271438305	8.218849719530656	3.038936493657272	up
MW6104	4-Quinolone-3-Carboxamide Furan CB2 Agonist	C30H36N2O4	530.3007	488.2675	0.6137	4.9171	1	1314230-75-5	--	--	96482.0	1	-	-	2030.7	11425.39	2418.77	1398.52	5522.21	3756.15	4484.88	18502.25	12728.49	5108.39	162757.11	65892.64	69082.43	38716.31	70203.7	37185.58	62056.97	56283.83	164815.6	80518.81	1.3670869428384025	0.0006104867913652714	11.985216936360636	3.5831841173645382	up
MW2873	Thiamine pyrophosphate	C12H19N4O7P2S	406.0266	425.045	0.6137	4.5212	1	--	HMDB0001372	C00068	--	1	-	-	10551.52	522.66	6440.54	10419.92	11298.59	9362.93	9795.18	967.21	929.57	640.87	269.99	256.94	429.21	315.78	78.26	93.09	205.07	373.03	830.95	185.49	1.1898339304822665	0.003923522063198868	0.04985820378772075	-4.326025281137575	down
MW1007	CL(i-14:0/i-16:0/i-13:0/i-19:0)	C71H138O17P2	357.0622	338.0638	0.6136	4.3873	1	--	HMDB0092280	--	--	1	-	-	24701.61	3371.14	17903.74	20711.47	22110.48	21209.55	22854.52	5029.8	5433.08	15085.9	687.94	1166.85	1249.48	896.69	422.6	1019.31	251.08	689.79	1706.35	357.31	1.4415050637745597	0.00026165426407518544	0.053325744648629526	-4.22902398306009	down
MW1375	Furafylline	C12H12N4O3	279.0894	260.0909	0.6136	6.122999999999999	1	80288-49-9	--	--	24065.0	1	-	-	122585.22	48987.54	65890.12	134893.14	123199.39	125783.8	23783.47	136884.45	125841.75	29785.11	358029.79	129705.23	181199.38	302865.02	198431.62	161802.54	197718.46	152499.34	283523.65	204245.72	1.3143505231768515	0.0004226791915221243	2.314358025779334	1.2106120632621362	up
MW6372	Alpha-Calacorene	C15H20	267.1093	200.1565	0.6134	1.5643	1	--	--	--	265068.0	1	-	-	73449.29	25125.84	51751.21	80490.44	67015.9	85783.57	75831.53	20834.29	19896.65	54580.82	1288.54	7730.48	5648.08	1146.78	273.15	625.2	1016.66	281.98	490.48	9173.59	1.5015363465731624	9.523682068791385e-05	0.049886370588597725	-4.32521047782066	down
MW52	(R)-Lisofylline	C13H20N4O3	299.152	280.1535	0.6134	0.951	1	100324-81-0	--	D04748	45571.0	1	-	-	47576.61	71335.57	7939.34	45180.54	47700.21	47713.71	45374.62	52793.74	54229.06	64351.21	6800.05	31901.14	19591.41	18533.01	33272.7	17528.34	33564.73	11644.93	26964.95	12680.22	1.2755111108768145	0.0004951496649916067	0.4388348726145465	-1.1882499188522324	down
MW9131	Serratanidine	C16H25NO4	318.1682	295.1784	0.6133	2.4091	1	19637-58-2	--	C09899	--	1	-	-	106699.99	247.62	38162.2	75428.13	103937.61	110503.19	65061.4	41048.09	57919.01	33602.62	11909.77	7263.22	579.86	438.81	5180.44	7189.63	185.45	387.27	7188.52	746.02	1.3508991738211718	0.0005906949919495951	0.06491993343258988	-3.9451946691944735	down
MW8956	PS(18:0/24:1(15Z))	C48H92NO10P	856.6436	873.6459	0.6133	4.0626	1	--	HMDB0112385	--	--	1	-	-	132520.33	172822.38	2748.45	160128.78	126051.94	163469.64	189690.22	139560.51	102082.06	249581.71	124111.3	19867.64	52727.91	21564.97	5801.41	3673.79	5836.16	5574.94	12490.37	33823.96	1.355218654663082	0.00020304999334778997	0.1984299554802544	-2.333298259885348	down
MW939	Cimifugin	C16H18O6	327.0845	306.1103	0.6133	3.0705	1	37921-38-3	--	C09000	--	1	-	-	20822.91	3630.73	20451.5	22222.46	22689.21	29734.19	27223.65	62030.37	38236.49	3330.76	106312.01	89988.99	92340.44	138236.08	180418.71	109229.55	189284.98	90485.33	61486.44	60454.67	1.4473317414661775	0.00010706929476156795	4.466298124788341	2.1590795540709826	up
MW5938	3-AMINOPROPANESULPHONIC ACID	C3H9NO3S	205.9831	139.0303	0.6133	0.8676	1	3687-18-1	--	C03349	43475.0	1	-	-	38820.66	2229.05	24307.98	31536.96	30236.26	32348.99	38027.24	8417.37	8680.62	2503.25	8744.98	608.03	7762.85	6781.85	6198.12	9114.76	6012.09	8718.39	9519.49	8642.39	1.0346554440660058	0.012394635726599271	0.3321057897442743	-1.5902852206991265	down
MW8278	Mono-(2-ethyl-5-carboxypentyl) phthalate	C16H20O6	308.125	308.126	0.6132	1.3688	1	--	HMDB0094647	--	--	1	-	-	791.9	4306.14	11561.74	667.68	1584.58	2435.31	3328.8	8227.02	7458.17	2089.46	12506.92	25485.11	40274.91	12876.56	29447.87	51723.83	36250.56	54932.08	13705.94	24047.31	1.3865898266322378	0.0004360104578303537	7.09647615592639	2.8271028141410808	up
MW8253	MGDG 32:0	C41H78O10	772.5924	730.5595	0.6132	1.0032	1	--	HMDB0031680	--	--	1	-	-	6665.36	9407.56	322.62	4074.81	5140.13	4330.13	2964.94	3588.55	1262.94	11378.77	15436.32	17578.81	14185.24	15245.35	18763.03	12249.29	7567.0	11093.24	14105.6	16864.87	1.4417117750261688	7.2573347795779585e-06	2.9121072798026533	1.5420635042963613	up
MW7553	Glu-Phe	C14H18N2O5	277.1187	294.1216	0.6131	4.9899	2-search-DB	--	HMDB0029156	--	--	1	-	-	129488.53	65901.45	124225.63	128839.99	124022.27	132393.27	129437.55	25901.28	26542.63	132473.13	3890.04	2740.72	1312.3	2296.14	2544.24	530.26	637.54	696.73	2597.09	261.99	1.5428327189214313	5.5587470155945725e-05	0.01717681322664411	-5.8633937882562135	down
MW6840	Cetiedil	C20H31NO2S	721.4053	349.2076	0.613	4.7861	1	14176-10-4	--	C13786	--	1	-	-	2073.18	3376.55	43706.5	2470.1	939.82	1578.0	13357.96	14591.51	5536.19	4501.75	379293.12	110980.65	370862.56	294673.23	172334.26	240227.99	175126.19	204238.02	485783.63	294359.1	1.5324095672967464	4.4210087791144565e-05	29.608515800665923	4.887940268594802	up
MW8980	Pyriprole	C18H10Cl2F5N5S	492.9943	492.9954	0.6129	4.6263	1	394730-71-3	--	C18580	--	1	-	-	1298.83	10475.7	6258.24	650.77	619.45	667.07	660.86	778.26	814.43	665.77	223305.29	104800.12	153099.95	59908.16	34083.18	44374.15	34809.89	49241.2	128807.13	98207.62	1.299004224897436	0.0011919477753016866	40.658012143622926	5.345467775376348	up
MW9471	THF-L-glutamate;Tetrahydropteroyldiglutamate;(6S)-H4PteGlu2	C24H30N8O9	613.1775	574.2136	0.6128	4.053	1	--	--	C09332	--	1	-	-	96240.67	126120.95	85534.88	106160.11	103470.13	111594.85	123853.06	105920.57	93058.31	150744.42	98253.46	39110.03	67090.58	34455.97	9843.78	6945.42	13785.86	5349.97	22452.56	38858.96	1.5288009506108828	4.771364901975446e-06	0.3048401332386625	-1.713875243851211	down
MW9103	Ser Arg His	C15H26N8O5	462.2179	398.2026	0.6128	3.8929	1	--	--	--	17750.0	1	-	-	44080.72	30296.29	29872.61	41677.9	38591.16	47840.25	43706.78	4604.5	3444.78	58369.99	536.19	73.94	153.96	304.7	49.99	143.57	1995.41	112.26	230.56	177.6	1.4690794295786735	0.0002070803831395397	0.011031666264605241	-6.502205472270117	down
MW7121	D-Xylonate	C5H10O6	189.0365	166.0477	0.6128	2.1463	1	526-91-0	METPA0050	C00502	--	1	-	-	15812.5	32800.15	32875.98	3225.46	16039.8	12700.98	2903.39	29822.5	25912.46	2407.12	103231.04	92582.51	41289.12	35043.96	134337.01	112942.93	87813.85	96567.29	128422.4	25676.84	1.4182583999725074	0.000265439865728703	4.916362627144451	2.2975913317171983	up
MW8344	N-Desmethyldroloxifene	C25H27NO2	440.158	373.2042	0.6126	3.978	1	83647330	HMDB0142480	--	--	1	-	-	19293.68	2475.55	526.06	21552.07	15968.29	19999.18	24641.91	3972.06	1633.64	10371.79	4366.53	302.04	1317.48	424.63	1000.21	521.83	853.9	101.9	2839.17	153.0	1.159514645465945	0.004984722422368793	0.09864878116462404	-3.3415549636471313	down
MW2838	TG(i-21:0/i-15:0/20:0)	C59H114O6	839.13	802.1804	0.6124	1.2039	1	--	HMDB0065258	--	--	1	-	-	61670.97	33818.97	33054.16	51018.52	46472.91	51958.33	53920.2	63015.75	61131.01	16808.39	19687.3	6391.77	42039.3	11913.48	4050.7	20369.94	9322.33	24794.2	15943.62	32590.17	1.2939689991931929	0.0002019962333996445	0.3956756034083928	-1.3376099806174069	down
MW2234	PGP(20:3(5Z,8Z,11Z)/18:2(9Z,12Z))	C44H78O13P2	875.4855	876.4918	0.6124	13.1888	1	--	HMDB0116453	--	--	1	-	-	361943.02	239201.59	340614.95	350333.36	281027.89	335970.96	830160.99	1176413.12	1014440.74	529831.35	32387.32	22533.14	62006.86	20120.4	38362.17	12106.8	63449.98	25340.34	100862.13	68023.12	1.3082493334172176	0.001090233267002692	0.08153797029309474	-3.6163841451941865	down
MW7830	IRIGENIN, 7-BENZYL ETHER	C25H22O8	527.0499	450.1315	0.6124	4.8989	1	--	--	--	43631.0	1	-	-	4275.27	17521.47	35202.3	10298.8	6007.39	9549.26	9383.58	18798.63	13413.15	5133.71	5205.52	7932.33	8286.66	2247.48	1549.69	2014.32	1363.85	2434.45	2315.6	4945.61	1.0468227601002356	0.012533948975672816	0.29552753451132224	-1.7586355412956265	down
MW1401	Glaucolide B	C21H26O10	875.2969	438.1526	0.6124	6.4548	1	11091-27-3	--	C09465	--	1	-	-	3238.04	13159.98	22145.69	4194.11	4263.47	2430.08	4146.27	24109.36	25931.97	12236.0	122874.35	25780.98	48496.22	43166.78	31025.85	45660.65	35621.72	25098.38	147112.11	22650.69	1.0593380973226785	0.012257626666131541	4.725630070078132	2.240506697243944	up
[truncated: 764 more rows]
